# Supplementary material for: An integrated leaf trait analysis of two Paleogene leaf floras
Source: PeerJ. 2023 Apr 10;11:e15140. doi: 10.7717/peerj.15140 (PMC10100813; doi:10.7717/peerj.15140)
Supplement: Supplemental Information 12 [file peerj-11-15140-s012.xlsx]

## Sheet: data
collection	specimen_ID	locality	specimen
Senckenberg Natural History Collections Dresden, Museum of Mineralogy and Geology, Paleobotanical collection	Sf._3	Seifhennersdorf	Acer_angustilobum
Senckenberg Natural History Collections Dresden, Museum of Mineralogy and Geology, Paleobotanical collection	Sf._6:1,2	Seifhennersdorf	Acer_angustilobum
Senckenberg Natural History Collections Dresden, Museum of Mineralogy and Geology, Paleobotanical collection	Sf._10	Seifhennersdorf	Acer_angustilobum
Senckenberg Natural History Collections Dresden, Museum of Mineralogy and Geology, Paleobotanical collection	Sf._25:1,2 (I)	Seifhennersdorf	Acer_angustilobum
Senckenberg Natural History Collections Dresden, Museum of Mineralogy and Geology, Paleobotanical collection	Sf._26	Seifhennersdorf	Acer_angustilobum
Senckenberg Natural History Collections Dresden, Museum of Mineralogy and Geology, Paleobotanical collection	Sf._34	Seifhennersdorf	Acer_angustilobum
Senckenberg Natural History Collections Dresden, Museum of Mineralogy and Geology, Paleobotanical collection	Sf._44a	Seifhennersdorf	Acer_angustilobum
Senckenberg Natural History Collections Dresden, Museum of Mineralogy and Geology, Paleobotanical collection	Sf._58	Seifhennersdorf	Acer_angustilobum
Senckenberg Natural History Collections Dresden, Museum of Mineralogy and Geology, Paleobotanical collection	Sf._59/8404	Seifhennersdorf	Acer_angustilobum
Senckenberg Natural History Collections Dresden, Museum of Mineralogy and Geology, Paleobotanical collection	Sf._61	Seifhennersdorf	Acer_angustilobum
Senckenberg Natural History Collections Dresden, Museum of Mineralogy and Geology, Paleobotanical collection	Sf._62	Seifhennersdorf	Acer_angustilobum
Senckenberg Natural History Collections Dresden, Museum of Mineralogy and Geology, Paleobotanical collection	Sf._63	Seifhennersdorf	Acer_angustilobum
Senckenberg Natural History Collections Dresden, Museum of Mineralogy and Geology, Paleobotanical collection	Sf._68	Seifhennersdorf	Acer_angustilobum
Senckenberg Natural History Collections Dresden, Museum of Mineralogy and Geology, Paleobotanical collection	Sf._69	Seifhennersdorf	Acer_angustilobum
Senckenberg Natural History Collections Dresden, Museum of Mineralogy and Geology, Paleobotanical collection	Sf._71	Seifhennersdorf	Acer_angustilobum
Senckenberg Natural History Collections Dresden, Museum of Mineralogy and Geology, Paleobotanical collection	Sf._73	Seifhennersdorf	Acer_angustilobum
Senckenberg Natural History Collections Dresden, Museum of Mineralogy and Geology, Paleobotanical collection	Sf._80	Seifhennersdorf	Acer_angustilobum
Senckenberg Natural History Collections Dresden, Museum of Mineralogy and Geology, Paleobotanical collection	Sf._845a	Seifhennersdorf	Acer_angustilobum
Senckenberg Natural History Collections Dresden, Museum of Mineralogy and Geology, Paleobotanical collection	Sf._953	Seifhennersdorf	Acer_angustilobum
Senckenberg Natural History Collections Dresden, Museum of Mineralogy and Geology, Paleobotanical collection	Sf._2991	Seifhennersdorf	Acer_angustilobum
Senckenberg Natural History Collections Dresden, Museum of Mineralogy and Geology, Paleobotanical collection	Sf._2994	Seifhennersdorf	Acer_angustilobum
Senckenberg Natural History Collections Dresden, Museum of Mineralogy and Geology, Paleobotanical collection	Sf._2995	Seifhennersdorf	Acer_angustilobum
Senckenberg Natural History Collections Dresden, Museum of Mineralogy and Geology, Paleobotanical collection	Sf._3002	Seifhennersdorf	Acer_angustilobum
Senckenberg Natural History Collections Dresden, Museum of Mineralogy and Geology, Paleobotanical collection	Sf._3005:1,2	Seifhennersdorf	Acer_angustilobum
Senckenberg Natural History Collections Dresden, Museum of Mineralogy and Geology, Paleobotanical collection	Sf._3006	Seifhennersdorf	Acer_angustilobum
Senckenberg Natural History Collections Dresden, Museum of Mineralogy and Geology, Paleobotanical collection	Sf._3008	Seifhennersdorf	Acer_angustilobum
Senckenberg Natural History Collections Dresden, Museum of Mineralogy and Geology, Paleobotanical collection	Sf._3011	Seifhennersdorf	Acer_angustilobum
Senckenberg Natural History Collections Dresden, Museum of Mineralogy and Geology, Paleobotanical collection	Sf._3014	Seifhennersdorf	Acer_angustilobum
Senckenberg Natural History Collections Dresden, Museum of Mineralogy and Geology, Paleobotanical collection	Sf._3015:1,2	Seifhennersdorf	Acer_angustilobum
Senckenberg Natural History Collections Dresden, Museum of Mineralogy and Geology, Paleobotanical collection	Sf._3030	Seifhennersdorf	Acer_angustilobum
Senckenberg Natural History Collections Dresden, Museum of Mineralogy and Geology, Paleobotanical collection	Sf._3031:1,2	Seifhennersdorf	Acer_angustilobum
Senckenberg Natural History Collections Dresden, Museum of Mineralogy and Geology, Paleobotanical collection	Sf._3038a	Seifhennersdorf	Acer_angustilobum
Senckenberg Natural History Collections Dresden, Museum of Mineralogy and Geology, Paleobotanical collection	Sf._3040/2352	Seifhennersdorf	Acer_angustilobum
Senckenberg Natural History Collections Dresden, Museum of Mineralogy and Geology, Paleobotanical collection	Sf._3045:1,2	Seifhennersdorf	Acer_angustilobum
Senckenberg Natural History Collections Dresden, Museum of Mineralogy and Geology, Paleobotanical collection	Sf._3047:1,2	Seifhennersdorf	Acer_angustilobum
Senckenberg Natural History Collections Dresden, Museum of Mineralogy and Geology, Paleobotanical collection	Sf._3052	Seifhennersdorf	Acer_angustilobum
Senckenberg Natural History Collections Dresden, Museum of Mineralogy and Geology, Paleobotanical collection	Sf._3053	Seifhennersdorf	Acer_angustilobum
Senckenberg Natural History Collections Dresden, Museum of Mineralogy and Geology, Paleobotanical collection	Sf._3056/3039	Seifhennersdorf	Acer_angustilobum
Senckenberg Natural History Collections Dresden, Museum of Mineralogy and Geology, Paleobotanical collection	Sf._3297	Seifhennersdorf	Acer_angustilobum
Senckenberg Natural History Collections Dresden, Museum of Mineralogy and Geology, Paleobotanical collection	Sf._3329	Seifhennersdorf	Acer_angustilobum
Senckenberg Natural History Collections Dresden, Museum of Mineralogy and Geology, Paleobotanical collection	Sf._3330:1,2	Seifhennersdorf	Acer_angustilobum
Senckenberg Natural History Collections Dresden, Museum of Mineralogy and Geology, Paleobotanical collection	Sf._3505:1,2	Seifhennersdorf	Acer_angustilobum
Senckenberg Natural History Collections Dresden, Museum of Mineralogy and Geology, Paleobotanical collection	Sf._3524	Seifhennersdorf	Acer_angustilobum
Senckenberg Natural History Collections Dresden, Museum of Mineralogy and Geology, Paleobotanical collection	Sf._3714:1,2	Seifhennersdorf	Acer_angustilobum
Senckenberg Natural History Collections Dresden, Museum of Mineralogy and Geology, Paleobotanical collection	Sf._3746:1,2	Seifhennersdorf	Acer_angustilobum
Senckenberg Natural History Collections Dresden, Museum of Mineralogy and Geology, Paleobotanical collection	Sf._3755:1,2	Seifhennersdorf	Acer_angustilobum
Senckenberg Natural History Collections Dresden, Museum of Mineralogy and Geology, Paleobotanical collection	Sf._3766	Seifhennersdorf	Acer_angustilobum
Senckenberg Natural History Collections Dresden, Museum of Mineralogy and Geology, Paleobotanical collection	Sf._3768	Seifhennersdorf	Acer_angustilobum
Senckenberg Natural History Collections Dresden, Museum of Mineralogy and Geology, Paleobotanical collection	Sf._4050:1,2	Seifhennersdorf	Acer_angustilobum
Senckenberg Natural History Collections Dresden, Museum of Mineralogy and Geology, Paleobotanical collection	Sf._4072	Seifhennersdorf	Acer_angustilobum
Senckenberg Natural History Collections Dresden, Museum of Mineralogy and Geology, Paleobotanical collection	Sf._4120/4124	Seifhennersdorf	Acer_angustilobum
Senckenberg Natural History Collections Dresden, Museum of Mineralogy and Geology, Paleobotanical collection	Sf._4132	Seifhennersdorf	Acer_angustilobum
Senckenberg Natural History Collections Dresden, Museum of Mineralogy and Geology, Paleobotanical collection	Sf._4189:1,2	Seifhennersdorf	Acer_angustilobum
Senckenberg Natural History Collections Dresden, Museum of Mineralogy and Geology, Paleobotanical collection	Sf._4203	Seifhennersdorf	Acer_angustilobum
Senckenberg Natural History Collections Dresden, Museum of Mineralogy and Geology, Paleobotanical collection	Sf._4225	Seifhennersdorf	Acer_angustilobum
Senckenberg Natural History Collections Dresden, Museum of Mineralogy and Geology, Paleobotanical collection	Sf._4404a	Seifhennersdorf	Acer_angustilobum
Senckenberg Natural History Collections Dresden, Museum of Mineralogy and Geology, Paleobotanical collection	Sf._4404b	Seifhennersdorf	Acer_angustilobum
Senckenberg Natural History Collections Dresden, Museum of Mineralogy and Geology, Paleobotanical collection	Sf._4418	Seifhennersdorf	Acer_angustilobum
Senckenberg Natural History Collections Dresden, Museum of Mineralogy and Geology, Paleobotanical collection	Sf._4461/4670a	Seifhennersdorf	Acer_angustilobum
Senckenberg Natural History Collections Dresden, Museum of Mineralogy and Geology, Paleobotanical collection	Sf._4468	Seifhennersdorf	Acer_angustilobum
Senckenberg Natural History Collections Dresden, Museum of Mineralogy and Geology, Paleobotanical collection	Sf._4470	Seifhennersdorf	Acer_angustilobum
Senckenberg Natural History Collections Dresden, Museum of Mineralogy and Geology, Paleobotanical collection	Sf._4476	Seifhennersdorf	Acer_angustilobum
Senckenberg Natural History Collections Dresden, Museum of Mineralogy and Geology, Paleobotanical collection	Sf._4478	Seifhennersdorf	Acer_angustilobum
Senckenberg Natural History Collections Dresden, Museum of Mineralogy and Geology, Paleobotanical collection	Sf._4480:1,2	Seifhennersdorf	Acer_angustilobum
Senckenberg Natural History Collections Dresden, Museum of Mineralogy and Geology, Paleobotanical collection	Sf._4484	Seifhennersdorf	Acer_angustilobum
Senckenberg Natural History Collections Dresden, Museum of Mineralogy and Geology, Paleobotanical collection	Sf._4492/4496	Seifhennersdorf	Acer_angustilobum
Senckenberg Natural History Collections Dresden, Museum of Mineralogy and Geology, Paleobotanical collection	Sf._4495	Seifhennersdorf	Acer_angustilobum
Senckenberg Natural History Collections Dresden, Museum of Mineralogy and Geology, Paleobotanical collection	Sf._4497	Seifhennersdorf	Acer_angustilobum
Senckenberg Natural History Collections Dresden, Museum of Mineralogy and Geology, Paleobotanical collection	Sf._4503:1,2a	Seifhennersdorf	Acer_angustilobum
Senckenberg Natural History Collections Dresden, Museum of Mineralogy and Geology, Paleobotanical collection	Sf._4504/4487a	Seifhennersdorf	Acer_angustilobum
Senckenberg Natural History Collections Dresden, Museum of Mineralogy and Geology, Paleobotanical collection	Sf._4504/4487b	Seifhennersdorf	Acer_angustilobum
Senckenberg Natural History Collections Dresden, Museum of Mineralogy and Geology, Paleobotanical collection	Sf._4509b	Seifhennersdorf	Acer_angustilobum
Senckenberg Natural History Collections Dresden, Museum of Mineralogy and Geology, Paleobotanical collection	Sf._4511:1,2	Seifhennersdorf	Acer_angustilobum
Senckenberg Natural History Collections Dresden, Museum of Mineralogy and Geology, Paleobotanical collection	Sf._4518	Seifhennersdorf	Acer_angustilobum
Senckenberg Natural History Collections Dresden, Museum of Mineralogy and Geology, Paleobotanical collection	Sf._4519	Seifhennersdorf	Acer_angustilobum
Senckenberg Natural History Collections Dresden, Museum of Mineralogy and Geology, Paleobotanical collection	Sf._4522	Seifhennersdorf	Acer_angustilobum
Senckenberg Natural History Collections Dresden, Museum of Mineralogy and Geology, Paleobotanical collection	Sf._4523	Seifhennersdorf	Acer_angustilobum
Senckenberg Natural History Collections Dresden, Museum of Mineralogy and Geology, Paleobotanical collection	Sf._4532	Seifhennersdorf	Acer_angustilobum
Senckenberg Natural History Collections Dresden, Museum of Mineralogy and Geology, Paleobotanical collection	Sf._4536	Seifhennersdorf	Acer_angustilobum
Senckenberg Natural History Collections Dresden, Museum of Mineralogy and Geology, Paleobotanical collection	Sf._4538	Seifhennersdorf	Acer_angustilobum
Senckenberg Natural History Collections Dresden, Museum of Mineralogy and Geology, Paleobotanical collection	Sf._4561	Seifhennersdorf	Acer_angustilobum
Senckenberg Natural History Collections Dresden, Museum of Mineralogy and Geology, Paleobotanical collection	Sf._4564	Seifhennersdorf	Acer_angustilobum
Senckenberg Natural History Collections Dresden, Museum of Mineralogy and Geology, Paleobotanical collection	Sf._4565/4459	Seifhennersdorf	Acer_angustilobum
Senckenberg Natural History Collections Dresden, Museum of Mineralogy and Geology, Paleobotanical collection	Sf._4566	Seifhennersdorf	Acer_angustilobum
Senckenberg Natural History Collections Dresden, Museum of Mineralogy and Geology, Paleobotanical collection	Sf._4567	Seifhennersdorf	Acer_angustilobum
Senckenberg Natural History Collections Dresden, Museum of Mineralogy and Geology, Paleobotanical collection	Sf._4571	Seifhennersdorf	Acer_angustilobum
Senckenberg Natural History Collections Dresden, Museum of Mineralogy and Geology, Paleobotanical collection	Sf._4572/4560	Seifhennersdorf	Acer_angustilobum
Senckenberg Natural History Collections Dresden, Museum of Mineralogy and Geology, Paleobotanical collection	Sf._4574	Seifhennersdorf	Acer_angustilobum
Senckenberg Natural History Collections Dresden, Museum of Mineralogy and Geology, Paleobotanical collection	Sf._4581	Seifhennersdorf	Acer_angustilobum
Senckenberg Natural History Collections Dresden, Museum of Mineralogy and Geology, Paleobotanical collection	Sf._4582:1,2	Seifhennersdorf	Acer_angustilobum
Senckenberg Natural History Collections Dresden, Museum of Mineralogy and Geology, Paleobotanical collection	Sf._4585	Seifhennersdorf	Acer_angustilobum
Senckenberg Natural History Collections Dresden, Museum of Mineralogy and Geology, Paleobotanical collection	Sf._4589/4578	Seifhennersdorf	Acer_angustilobum
Senckenberg Natural History Collections Dresden, Museum of Mineralogy and Geology, Paleobotanical collection	Sf._4595	Seifhennersdorf	Acer_angustilobum
Senckenberg Natural History Collections Dresden, Museum of Mineralogy and Geology, Paleobotanical collection	Sf._4598	Seifhennersdorf	Acer_angustilobum
Senckenberg Natural History Collections Dresden, Museum of Mineralogy and Geology, Paleobotanical collection	Sf._4600	Seifhennersdorf	Acer_angustilobum
Senckenberg Natural History Collections Dresden, Museum of Mineralogy and Geology, Paleobotanical collection	Sf._4601	Seifhennersdorf	Acer_angustilobum
Senckenberg Natural History Collections Dresden, Museum of Mineralogy and Geology, Paleobotanical collection	Sf._4603a	Seifhennersdorf	Acer_angustilobum
Senckenberg Natural History Collections Dresden, Museum of Mineralogy and Geology, Paleobotanical collection	Sf._4606	Seifhennersdorf	Acer_angustilobum
Senckenberg Natural History Collections Dresden, Museum of Mineralogy and Geology, Paleobotanical collection	Sf._4612	Seifhennersdorf	Acer_angustilobum
Senckenberg Natural History Collections Dresden, Museum of Mineralogy and Geology, Paleobotanical collection	Sf._4613	Seifhennersdorf	Acer_angustilobum
Senckenberg Natural History Collections Dresden, Museum of Mineralogy and Geology, Paleobotanical collection	Sf._4624	Seifhennersdorf	Acer_angustilobum
Senckenberg Natural History Collections Dresden, Museum of Mineralogy and Geology, Paleobotanical collection	Sf._4630	Seifhennersdorf	Acer_angustilobum
Senckenberg Natural History Collections Dresden, Museum of Mineralogy and Geology, Paleobotanical collection	Sf._4635	Seifhennersdorf	Acer_angustilobum
Senckenberg Natural History Collections Dresden, Museum of Mineralogy and Geology, Paleobotanical collection	Sf._4646	Seifhennersdorf	Acer_angustilobum
Senckenberg Natural History Collections Dresden, Museum of Mineralogy and Geology, Paleobotanical collection	Sf._4647	Seifhennersdorf	Acer_angustilobum
Senckenberg Natural History Collections Dresden, Museum of Mineralogy and Geology, Paleobotanical collection	Sf._4656	Seifhennersdorf	Acer_angustilobum
Senckenberg Natural History Collections Dresden, Museum of Mineralogy and Geology, Paleobotanical collection	Sf._4662	Seifhennersdorf	Acer_angustilobum
Senckenberg Natural History Collections Dresden, Museum of Mineralogy and Geology, Paleobotanical collection	Sf._4672/4607	Seifhennersdorf	Acer_angustilobum
Senckenberg Natural History Collections Dresden, Museum of Mineralogy and Geology, Paleobotanical collection	Sf._4679	Seifhennersdorf	Acer_angustilobum
Senckenberg Natural History Collections Dresden, Museum of Mineralogy and Geology, Paleobotanical collection	Sf._7833:1,2	Seifhennersdorf	Acer_angustilobum
Senckenberg Natural History Collections Dresden, Museum of Mineralogy and Geology, Paleobotanical collection	Sf._8138:1,2	Seifhennersdorf	Acer_angustilobum
Senckenberg Natural History Collections Dresden, Museum of Mineralogy and Geology, Paleobotanical collection	Sf._8140	Seifhennersdorf	Acer_angustilobum
Senckenberg Natural History Collections Dresden, Museum of Mineralogy and Geology, Paleobotanical collection	Sf._8141:1,2	Seifhennersdorf	Acer_angustilobum
Senckenberg Natural History Collections Dresden, Museum of Mineralogy and Geology, Paleobotanical collection	Sf._8143:1,2	Seifhennersdorf	Acer_angustilobum
Senckenberg Natural History Collections Dresden, Museum of Mineralogy and Geology, Paleobotanical collection	Sf._8162	Seifhennersdorf	Acer_angustilobum
Senckenberg Natural History Collections Dresden, Museum of Mineralogy and Geology, Paleobotanical collection	Sf._8164:1,2	Seifhennersdorf	Acer_angustilobum
Senckenberg Natural History Collections Dresden, Museum of Mineralogy and Geology, Paleobotanical collection	Sf._8165:1,2	Seifhennersdorf	Acer_angustilobum
Senckenberg Natural History Collections Dresden, Museum of Mineralogy and Geology, Paleobotanical collection	Sf._8168	Seifhennersdorf	Acer_angustilobum
Senckenberg Natural History Collections Dresden, Museum of Mineralogy and Geology, Paleobotanical collection	Sf._8169	Seifhennersdorf	Acer_angustilobum
Senckenberg Natural History Collections Dresden, Museum of Mineralogy and Geology, Paleobotanical collection	Sf._8171:1,2	Seifhennersdorf	Acer_angustilobum
Senckenberg Natural History Collections Dresden, Museum of Mineralogy and Geology, Paleobotanical collection	Sf._8172:1,2	Seifhennersdorf	Acer_angustilobum
Senckenberg Natural History Collections Dresden, Museum of Mineralogy and Geology, Paleobotanical collection	Sf._8173:1,2	Seifhennersdorf	Acer_angustilobum
Senckenberg Natural History Collections Dresden, Museum of Mineralogy and Geology, Paleobotanical collection	Sf._8174	Seifhennersdorf	Acer_angustilobum
Senckenberg Natural History Collections Dresden, Museum of Mineralogy and Geology, Paleobotanical collection	Sf._8176 (I):1,2	Seifhennersdorf	Acer_angustilobum
Senckenberg Natural History Collections Dresden, Museum of Mineralogy and Geology, Paleobotanical collection	Sf._8194:1,2	Seifhennersdorf	Acer_angustilobum
Senckenberg Natural History Collections Dresden, Museum of Mineralogy and Geology, Paleobotanical collection	Sf._8203	Seifhennersdorf	Acer_angustilobum
Senckenberg Natural History Collections Dresden, Museum of Mineralogy and Geology, Paleobotanical collection	Sf._8233:1,2b	Seifhennersdorf	Acer_angustilobum
Senckenberg Natural History Collections Dresden, Museum of Mineralogy and Geology, Paleobotanical collection	Sf._8350:1,2	Seifhennersdorf	Acer_angustilobum
Senckenberg Natural History Collections Dresden, Museum of Mineralogy and Geology, Paleobotanical collection	Sf._8353	Seifhennersdorf	Acer_angustilobum
Senckenberg Natural History Collections Dresden, Museum of Mineralogy and Geology, Paleobotanical collection	Sf._8358	Seifhennersdorf	Acer_angustilobum
Senckenberg Natural History Collections Dresden, Museum of Mineralogy and Geology, Paleobotanical collection	Sf._8359	Seifhennersdorf	Acer_angustilobum
Senckenberg Natural History Collections Dresden, Museum of Mineralogy and Geology, Paleobotanical collection	Sf._8360	Seifhennersdorf	Acer_angustilobum
Senckenberg Natural History Collections Dresden, Museum of Mineralogy and Geology, Paleobotanical collection	Sf._8361	Seifhennersdorf	Acer_angustilobum
Senckenberg Natural History Collections Dresden, Museum of Mineralogy and Geology, Paleobotanical collection	Sf._8363	Seifhennersdorf	Acer_angustilobum
Senckenberg Natural History Collections Dresden, Museum of Mineralogy and Geology, Paleobotanical collection	Sf._8364	Seifhennersdorf	Acer_angustilobum
Senckenberg Natural History Collections Dresden, Museum of Mineralogy and Geology, Paleobotanical collection	Sf._8365	Seifhennersdorf	Acer_angustilobum
Senckenberg Natural History Collections Dresden, Museum of Mineralogy and Geology, Paleobotanical collection	Sf._8384	Seifhennersdorf	Acer_angustilobum
Senckenberg Natural History Collections Dresden, Museum of Mineralogy and Geology, Paleobotanical collection	Sf._8419	Seifhennersdorf	Acer_angustilobum
Senckenberg Natural History Collections Dresden, Museum of Mineralogy and Geology, Paleobotanical collection	Sf._8631:1,2	Seifhennersdorf	Acer_angustilobum
Senckenberg Natural History Collections Dresden, Museum of Mineralogy and Geology, Paleobotanical collection	Sf._8662a	Seifhennersdorf	Acer_angustilobum
Senckenberg Natural History Collections Dresden, Museum of Mineralogy and Geology, Paleobotanical collection	Sf._3028:1,2	Seifhennersdorf	Acer_cfdasycarpoides
Senckenberg Natural History Collections Dresden, Museum of Mineralogy and Geology, Paleobotanical collection	Sf._3693:1,2	Seifhennersdorf	Acer_cfdasycarpoides
Senckenberg Natural History Collections Dresden, Museum of Mineralogy and Geology, Paleobotanical collection	Sf._4071	Seifhennersdorf	Acer_cfdasycarpoides
Senckenberg Natural History Collections Dresden, Museum of Mineralogy and Geology, Paleobotanical collection	Sf._4118	Seifhennersdorf	Acer_cfdasycarpoides
Senckenberg Natural History Collections Dresden, Museum of Mineralogy and Geology, Paleobotanical collection	Sf._4121	Seifhennersdorf	Acer_cfdasycarpoides
Senckenberg Natural History Collections Dresden, Museum of Mineralogy and Geology, Paleobotanical collection	Sf._4460	Seifhennersdorf	Acer_cfdasycarpoides
Senckenberg Natural History Collections Dresden, Museum of Mineralogy and Geology, Paleobotanical collection	Sf._4599	Seifhennersdorf	Acer_cfdasycarpoides
Senckenberg Natural History Collections Dresden, Museum of Mineralogy and Geology, Paleobotanical collection	Sf._7641	Seifhennersdorf	Acer_cfdasycarpoides
Senckenberg Natural History Collections Dresden, Museum of Mineralogy and Geology, Paleobotanical collection	Sf._8247	Seifhennersdorf	Acer_cfdasycarpoides
Senckenberg Natural History Collections Dresden, Museum of Mineralogy and Geology, Paleobotanical collection	Sf._8 (II)	Seifhennersdorf	Acer_cftricuspidatum
Senckenberg Natural History Collections Dresden, Museum of Mineralogy and Geology, Paleobotanical collection	Sf._16:1,2	Seifhennersdorf	Acer_cftricuspidatum
Senckenberg Natural History Collections Dresden, Museum of Mineralogy and Geology, Paleobotanical collection	Sf._18	Seifhennersdorf	Acer_cftricuspidatum
Senckenberg Natural History Collections Dresden, Museum of Mineralogy and Geology, Paleobotanical collection	Sf._21	Seifhennersdorf	Acer_cftricuspidatum
Senckenberg Natural History Collections Dresden, Museum of Mineralogy and Geology, Paleobotanical collection	Sf._30	Seifhennersdorf	Acer_cftricuspidatum
Senckenberg Natural History Collections Dresden, Museum of Mineralogy and Geology, Paleobotanical collection	Sf._31	Seifhennersdorf	Acer_cftricuspidatum
Senckenberg Natural History Collections Dresden, Museum of Mineralogy and Geology, Paleobotanical collection	Sf. 36:1,2	Seifhennersdorf	Acer_cftricuspidatum
Senckenberg Natural History Collections Dresden, Museum of Mineralogy and Geology, Paleobotanical collection	Sf._37:1,2	Seifhennersdorf	Acer_cftricuspidatum
Senckenberg Natural History Collections Dresden, Museum of Mineralogy and Geology, Paleobotanical collection	Sf._38	Seifhennersdorf	Acer_cftricuspidatum
Senckenberg Natural History Collections Dresden, Museum of Mineralogy and Geology, Paleobotanical collection	Sf._39	Seifhennersdorf	Acer_cftricuspidatum
Senckenberg Natural History Collections Dresden, Museum of Mineralogy and Geology, Paleobotanical collection	Sf._41	Seifhennersdorf	Acer_cftricuspidatum
Senckenberg Natural History Collections Dresden, Museum of Mineralogy and Geology, Paleobotanical collection	Sf._45	Seifhennersdorf	Acer_cftricuspidatum
Senckenberg Natural History Collections Dresden, Museum of Mineralogy and Geology, Paleobotanical collection	Sf._46	Seifhennersdorf	Acer_cftricuspidatum
Senckenberg Natural History Collections Dresden, Museum of Mineralogy and Geology, Paleobotanical collection	Sf._49/48	Seifhennersdorf	Acer_cftricuspidatum
Senckenberg Natural History Collections Dresden, Museum of Mineralogy and Geology, Paleobotanical collection	Sf._52	Seifhennersdorf	Acer_cftricuspidatum
Senckenberg Natural History Collections Dresden, Museum of Mineralogy and Geology, Paleobotanical collection	Sf._60	Seifhennersdorf	Acer_cftricuspidatum
Senckenberg Natural History Collections Dresden, Museum of Mineralogy and Geology, Paleobotanical collection	Sf._72	Seifhennersdorf	Acer_cftricuspidatum
Senckenberg Natural History Collections Dresden, Museum of Mineralogy and Geology, Paleobotanical collection	Sf._82a	Seifhennersdorf	Acer_cftricuspidatum
Senckenberg Natural History Collections Dresden, Museum of Mineralogy and Geology, Paleobotanical collection	Sf._82b	Seifhennersdorf	Acer_cftricuspidatum
Senckenberg Natural History Collections Dresden, Museum of Mineralogy and Geology, Paleobotanical collection	Sf._1372:1,2	Seifhennersdorf	Acer_cftricuspidatum
Senckenberg Natural History Collections Dresden, Museum of Mineralogy and Geology, Paleobotanical collection	Sf._2842b	Seifhennersdorf	Acer_cftricuspidatum
Senckenberg Natural History Collections Dresden, Museum of Mineralogy and Geology, Paleobotanical collection	Sf._3022	Seifhennersdorf	Acer_cftricuspidatum
Senckenberg Natural History Collections Dresden, Museum of Mineralogy and Geology, Paleobotanical collection	Sf._3029	Seifhennersdorf	Acer_cftricuspidatum
Senckenberg Natural History Collections Dresden, Museum of Mineralogy and Geology, Paleobotanical collection	Sf._3032	Seifhennersdorf	Acer_cftricuspidatum
Senckenberg Natural History Collections Dresden, Museum of Mineralogy and Geology, Paleobotanical collection	Sf._3042	Seifhennersdorf	Acer_cftricuspidatum
Senckenberg Natural History Collections Dresden, Museum of Mineralogy and Geology, Paleobotanical collection	Sf._3050	Seifhennersdorf	Acer_cftricuspidatum
Senckenberg Natural History Collections Dresden, Museum of Mineralogy and Geology, Paleobotanical collection	Sf._3123	Seifhennersdorf	Acer_cftricuspidatum
Senckenberg Natural History Collections Dresden, Museum of Mineralogy and Geology, Paleobotanical collection	Sf._3696:1,2	Seifhennersdorf	Acer_cftricuspidatum
Senckenberg Natural History Collections Dresden, Museum of Mineralogy and Geology, Paleobotanical collection	Sf._3712:1,2	Seifhennersdorf	Acer_cftricuspidatum
Senckenberg Natural History Collections Dresden, Museum of Mineralogy and Geology, Paleobotanical collection	Sf._3717:1,2	Seifhennersdorf	Acer_cftricuspidatum
Senckenberg Natural History Collections Dresden, Museum of Mineralogy and Geology, Paleobotanical collection	Sf._3718:1,2	Seifhennersdorf	Acer_cftricuspidatum
Senckenberg Natural History Collections Dresden, Museum of Mineralogy and Geology, Paleobotanical collection	Sf._3735	Seifhennersdorf	Acer_cftricuspidatum
Senckenberg Natural History Collections Dresden, Museum of Mineralogy and Geology, Paleobotanical collection	Sf._3760:1,2	Seifhennersdorf	Acer_cftricuspidatum
Senckenberg Natural History Collections Dresden, Museum of Mineralogy and Geology, Paleobotanical collection	Sf._3761a	Seifhennersdorf	Acer_cftricuspidatum
Senckenberg Natural History Collections Dresden, Museum of Mineralogy and Geology, Paleobotanical collection	Sf._4069	Seifhennersdorf	Acer_cftricuspidatum
Senckenberg Natural History Collections Dresden, Museum of Mineralogy and Geology, Paleobotanical collection	Sf._4086	Seifhennersdorf	Acer_cftricuspidatum
Senckenberg Natural History Collections Dresden, Museum of Mineralogy and Geology, Paleobotanical collection	Sf._4129	Seifhennersdorf	Acer_cftricuspidatum
Senckenberg Natural History Collections Dresden, Museum of Mineralogy and Geology, Paleobotanical collection	Sf._4142	Seifhennersdorf	Acer_cftricuspidatum
Senckenberg Natural History Collections Dresden, Museum of Mineralogy and Geology, Paleobotanical collection	Sf._4402	Seifhennersdorf	Acer_cftricuspidatum
Senckenberg Natural History Collections Dresden, Museum of Mineralogy and Geology, Paleobotanical collection	Sf._4403	Seifhennersdorf	Acer_cftricuspidatum
Senckenberg Natural History Collections Dresden, Museum of Mineralogy and Geology, Paleobotanical collection	Sf._4469	Seifhennersdorf	Acer_cftricuspidatum
Senckenberg Natural History Collections Dresden, Museum of Mineralogy and Geology, Paleobotanical collection	Sf._4494/4508	Seifhennersdorf	Acer_cftricuspidatum
Senckenberg Natural History Collections Dresden, Museum of Mineralogy and Geology, Paleobotanical collection	Sf._4579	Seifhennersdorf	Acer_cftricuspidatum
Senckenberg Natural History Collections Dresden, Museum of Mineralogy and Geology, Paleobotanical collection	Sf._4583:1,2	Seifhennersdorf	Acer_cftricuspidatum
Senckenberg Natural History Collections Dresden, Museum of Mineralogy and Geology, Paleobotanical collection	Sf._4586/4591	Seifhennersdorf	Acer_cftricuspidatum
Senckenberg Natural History Collections Dresden, Museum of Mineralogy and Geology, Paleobotanical collection	Sf._4592	Seifhennersdorf	Acer_cftricuspidatum
Senckenberg Natural History Collections Dresden, Museum of Mineralogy and Geology, Paleobotanical collection	Sf._4604	Seifhennersdorf	Acer_cftricuspidatum
Senckenberg Natural History Collections Dresden, Museum of Mineralogy and Geology, Paleobotanical collection	Sf._4605	Seifhennersdorf	Acer_cftricuspidatum
Senckenberg Natural History Collections Dresden, Museum of Mineralogy and Geology, Paleobotanical collection	Sf._4626/4625	Seifhennersdorf	Acer_cftricuspidatum
Senckenberg Natural History Collections Dresden, Museum of Mineralogy and Geology, Paleobotanical collection	Sf._4629	Seifhennersdorf	Acer_cftricuspidatum
Senckenberg Natural History Collections Dresden, Museum of Mineralogy and Geology, Paleobotanical collection	Sf._4631	Seifhennersdorf	Acer_cftricuspidatum
Senckenberg Natural History Collections Dresden, Museum of Mineralogy and Geology, Paleobotanical collection	Sf._4632	Seifhennersdorf	Acer_cftricuspidatum
Senckenberg Natural History Collections Dresden, Museum of Mineralogy and Geology, Paleobotanical collection	Sf._4651	Seifhennersdorf	Acer_cftricuspidatum
Senckenberg Natural History Collections Dresden, Museum of Mineralogy and Geology, Paleobotanical collection	Sf._4653	Seifhennersdorf	Acer_cftricuspidatum
Senckenberg Natural History Collections Dresden, Museum of Mineralogy and Geology, Paleobotanical collection	Sf._4655	Seifhennersdorf	Acer_cftricuspidatum
Senckenberg Natural History Collections Dresden, Museum of Mineralogy and Geology, Paleobotanical collection	Sf._4673/4669	Seifhennersdorf	Acer_cftricuspidatum
Senckenberg Natural History Collections Dresden, Museum of Mineralogy and Geology, Paleobotanical collection	Sf._7887	Seifhennersdorf	Acer_cftricuspidatum
Senckenberg Natural History Collections Dresden, Museum of Mineralogy and Geology, Paleobotanical collection	Sf._7888	Seifhennersdorf	Acer_cftricuspidatum
Senckenberg Natural History Collections Dresden, Museum of Mineralogy and Geology, Paleobotanical collection	Sf._8139	Seifhennersdorf	Acer_cftricuspidatum
Senckenberg Natural History Collections Dresden, Museum of Mineralogy and Geology, Paleobotanical collection	Sf._8163:1,2	Seifhennersdorf	Acer_cftricuspidatum
Senckenberg Natural History Collections Dresden, Museum of Mineralogy and Geology, Paleobotanical collection	Sf._8183/8184	Seifhennersdorf	Acer_cftricuspidatum
Senckenberg Natural History Collections Dresden, Museum of Mineralogy and Geology, Paleobotanical collection	Sf._8290	Seifhennersdorf	Acer_cftricuspidatum
Senckenberg Natural History Collections Dresden, Museum of Mineralogy and Geology, Paleobotanical collection	Sf._8291	Seifhennersdorf	Acer_cftricuspidatum
Senckenberg Natural History Collections Dresden, Museum of Mineralogy and Geology, Paleobotanical collection	Sf._8310:2	Seifhennersdorf	Acer_cftricuspidatum
Senckenberg Natural History Collections Dresden, Museum of Mineralogy and Geology, Paleobotanical collection	Sf._8327	Seifhennersdorf	Acer_cftricuspidatum
Senckenberg Natural History Collections Dresden, Museum of Mineralogy and Geology, Paleobotanical collection	Sf._8344	Seifhennersdorf	Acer_cftricuspidatum
Senckenberg Natural History Collections Dresden, Museum of Mineralogy and Geology, Paleobotanical collection	Sf._8368:1,2	Seifhennersdorf	Acer_cftricuspidatum
Senckenberg Natural History Collections Dresden, Museum of Mineralogy and Geology, Paleobotanical collection	Sf._8369	Seifhennersdorf	Acer_cftricuspidatum
Senckenberg Natural History Collections Dresden, Museum of Mineralogy and Geology, Paleobotanical collection	Sf._8370	Seifhennersdorf	Acer_cftricuspidatum
Senckenberg Natural History Collections Dresden, Museum of Mineralogy and Geology, Paleobotanical collection	Sf._8385	Seifhennersdorf	Acer_cftricuspidatum
Senckenberg Natural History Collections Dresden, Museum of Mineralogy and Geology, Paleobotanical collection	Sf._8397	Seifhennersdorf	Acer_cftricuspidatum
Senckenberg Natural History Collections Dresden, Museum of Mineralogy and Geology, Paleobotanical collection	Sf._8653	Seifhennersdorf	Acer_cftricuspidatum
Senckenberg Natural History Collections Dresden, Museum of Mineralogy and Geology, Paleobotanical collection	Sf._8661:1,2	Seifhennersdorf	Acer_cftricuspidatum
Senckenberg Natural History Collections Dresden, Museum of Mineralogy and Geology, Paleobotanical collection	Sf._33a	Seifhennersdorf	Acer_engelhardtii
Senckenberg Natural History Collections Dresden, Museum of Mineralogy and Geology, Paleobotanical collection	Sf._55:1,2	Seifhennersdorf	Acer_engelhardtii
Senckenberg Natural History Collections Dresden, Museum of Mineralogy and Geology, Paleobotanical collection	Sf._67	Seifhennersdorf	Acer_engelhardtii
Senckenberg Natural History Collections Dresden, Museum of Mineralogy and Geology, Paleobotanical collection	Sf._74	Seifhennersdorf	Acer_engelhardtii
Senckenberg Natural History Collections Dresden, Museum of Mineralogy and Geology, Paleobotanical collection	Sf._75	Seifhennersdorf	Acer_engelhardtii
Senckenberg Natural History Collections Dresden, Museum of Mineralogy and Geology, Paleobotanical collection	Sf._76	Seifhennersdorf	Acer_engelhardtii
Senckenberg Natural History Collections Dresden, Museum of Mineralogy and Geology, Paleobotanical collection	Sf._4671/4675	Seifhennersdorf	Acer_engelhardtii
Senckenberg Natural History Collections Dresden, Museum of Mineralogy and Geology, Paleobotanical collection	Sf._8371	Seifhennersdorf	Acer_engelhardtii
Senckenberg Natural History Collections Dresden, Museum of Mineralogy and Geology, Paleobotanical collection	Sf._65	Seifhennersdorf	Acer_palaeosaccharinum
Senckenberg Natural History Collections Dresden, Museum of Mineralogy and Geology, Paleobotanical collection	Sf._66	Seifhennersdorf	Acer_palaeosaccharinum
Senckenberg Natural History Collections Dresden, Museum of Mineralogy and Geology, Paleobotanical collection	Sf._3001	Seifhennersdorf	Acer_palaeosaccharinum
Senckenberg Natural History Collections Dresden, Museum of Mineralogy and Geology, Paleobotanical collection	Sf._3013	Seifhennersdorf	Acer_palaeosaccharinum
Senckenberg Natural History Collections Dresden, Museum of Mineralogy and Geology, Paleobotanical collection	Sf._3048	Seifhennersdorf	Acer_palaeosaccharinum
Senckenberg Natural History Collections Dresden, Museum of Mineralogy and Geology, Paleobotanical collection	Sf._3688	Seifhennersdorf	Acer_palaeosaccharinum
Senckenberg Natural History Collections Dresden, Museum of Mineralogy and Geology, Paleobotanical collection	Sf._3710:1,2a	Seifhennersdorf	Acer_palaeosaccharinum
Senckenberg Natural History Collections Dresden, Museum of Mineralogy and Geology, Paleobotanical collection	Sf._4023	Seifhennersdorf	Acer_palaeosaccharinum
Senckenberg Natural History Collections Dresden, Museum of Mineralogy and Geology, Paleobotanical collection	Sf._4145:1,2a	Seifhennersdorf	Acer_palaeosaccharinum
Senckenberg Natural History Collections Dresden, Museum of Mineralogy and Geology, Paleobotanical collection	Sf._4472	Seifhennersdorf	Acer_palaeosaccharinum
Senckenberg Natural History Collections Dresden, Museum of Mineralogy and Geology, Paleobotanical collection	Sf._4474	Seifhennersdorf	Acer_palaeosaccharinum
Senckenberg Natural History Collections Dresden, Museum of Mineralogy and Geology, Paleobotanical collection	Sf._4477	Seifhennersdorf	Acer_palaeosaccharinum
Senckenberg Natural History Collections Dresden, Museum of Mineralogy and Geology, Paleobotanical collection	Sf._4512	Seifhennersdorf	Acer_palaeosaccharinum
Senckenberg Natural History Collections Dresden, Museum of Mineralogy and Geology, Paleobotanical collection	Sf._4542	Seifhennersdorf	Acer_palaeosaccharinum
Senckenberg Natural History Collections Dresden, Museum of Mineralogy and Geology, Paleobotanical collection	Sf._4608	Seifhennersdorf	Acer_palaeosaccharinum
Senckenberg Natural History Collections Dresden, Museum of Mineralogy and Geology, Paleobotanical collection	Sf._4623	Seifhennersdorf	Acer_palaeosaccharinum
Senckenberg Natural History Collections Dresden, Museum of Mineralogy and Geology, Paleobotanical collection	Sf._4633	Seifhennersdorf	Acer_palaeosaccharinum
Senckenberg Natural History Collections Dresden, Museum of Mineralogy and Geology, Paleobotanical collection	Sf._4678	Seifhennersdorf	Acer_palaeosaccharinum
Senckenberg Natural History Collections Dresden, Museum of Mineralogy and Geology, Paleobotanical collection	Sf._7886	Seifhennersdorf	Acer_palaeosaccharinum
Senckenberg Natural History Collections Dresden, Museum of Mineralogy and Geology, Paleobotanical collection	Sf._8366	Seifhennersdorf	Acer_palaeosaccharinum
Senckenberg Natural History Collections Dresden, Museum of Mineralogy and Geology, Paleobotanical collection	Sf._8367	Seifhennersdorf	Acer_palaeosaccharinum
Senckenberg Natural History Collections Dresden, Museum of Mineralogy and Geology, Paleobotanical collection	Sf._4490	Seifhennersdorf	Acer_pseudomonspessulanum
Senckenberg Natural History Collections Dresden, Museum of Mineralogy and Geology, Paleobotanical collection	Sf._7471	Seifhennersdorf	Acer_pseudomonspessulanum
Senckenberg Natural History Collections Dresden, Museum of Mineralogy and Geology, Paleobotanical collection	Sf._8347	Seifhennersdorf	Acer_pseudomonspessulanum
Senckenberg Natural History Collections Dresden, Museum of Mineralogy and Geology, Paleobotanical collection	Sf._8676	Seifhennersdorf	Acer_pseudomonspessulanum
Senckenberg Natural History Collections Dresden, Museum of Mineralogy and Geology, Paleobotanical collection	Sf._1	Seifhennersdorf	Acer_rueminianum
Senckenberg Natural History Collections Dresden, Museum of Mineralogy and Geology, Paleobotanical collection	Sf._5:1,2	Seifhennersdorf	Acer_rueminianum
Senckenberg Natural History Collections Dresden, Museum of Mineralogy and Geology, Paleobotanical collection	Sf._22:1,2	Seifhennersdorf	Acer_rueminianum
Senckenberg Natural History Collections Dresden, Museum of Mineralogy and Geology, Paleobotanical collection	Sf._35	Seifhennersdorf	Acer_rueminianum
Senckenberg Natural History Collections Dresden, Museum of Mineralogy and Geology, Paleobotanical collection	Sf._64	Seifhennersdorf	Acer_rueminianum
Senckenberg Natural History Collections Dresden, Museum of Mineralogy and Geology, Paleobotanical collection	Sf._358/1680	Seifhennersdorf	Acer_rueminianum
Senckenberg Natural History Collections Dresden, Museum of Mineralogy and Geology, Paleobotanical collection	Sf._1249:1,2	Seifhennersdorf	Acer_rueminianum
Senckenberg Natural History Collections Dresden, Museum of Mineralogy and Geology, Paleobotanical collection	Sf._3017	Seifhennersdorf	Acer_rueminianum
Senckenberg Natural History Collections Dresden, Museum of Mineralogy and Geology, Paleobotanical collection	Sf._3041:1,2	Seifhennersdorf	Acer_rueminianum
Senckenberg Natural History Collections Dresden, Museum of Mineralogy and Geology, Paleobotanical collection	Sf._3044	Seifhennersdorf	Acer_rueminianum
Senckenberg Natural History Collections Dresden, Museum of Mineralogy and Geology, Paleobotanical collection	Sf._4164	Seifhennersdorf	Acer_rueminianum
Senckenberg Natural History Collections Dresden, Museum of Mineralogy and Geology, Paleobotanical collection	Sf._4339/8660	Seifhennersdorf	Acer_rueminianum
Senckenberg Natural History Collections Dresden, Museum of Mineralogy and Geology, Paleobotanical collection	Sf._4341	Seifhennersdorf	Acer_rueminianum
Senckenberg Natural History Collections Dresden, Museum of Mineralogy and Geology, Paleobotanical collection	Sf._4514	Seifhennersdorf	Acer_rueminianum
Senckenberg Natural History Collections Dresden, Museum of Mineralogy and Geology, Paleobotanical collection	Sf._4525	Seifhennersdorf	Acer_rueminianum
Senckenberg Natural History Collections Dresden, Museum of Mineralogy and Geology, Paleobotanical collection	Sf._4540	Seifhennersdorf	Acer_rueminianum
Senckenberg Natural History Collections Dresden, Museum of Mineralogy and Geology, Paleobotanical collection	Sf._4584	Seifhennersdorf	Acer_rueminianum
Senckenberg Natural History Collections Dresden, Museum of Mineralogy and Geology, Paleobotanical collection	Sf._4587	Seifhennersdorf	Acer_rueminianum
Senckenberg Natural History Collections Dresden, Museum of Mineralogy and Geology, Paleobotanical collection	Sf._4588/4577	Seifhennersdorf	Acer_rueminianum
Senckenberg Natural History Collections Dresden, Museum of Mineralogy and Geology, Paleobotanical collection	Sf._4610/4628	Seifhennersdorf	Acer_rueminianum
Senckenberg Natural History Collections Dresden, Museum of Mineralogy and Geology, Paleobotanical collection	Sf._4611:1,2	Seifhennersdorf	Acer_rueminianum
Senckenberg Natural History Collections Dresden, Museum of Mineralogy and Geology, Paleobotanical collection	Sf._4622/4676	Seifhennersdorf	Acer_rueminianum
Senckenberg Natural History Collections Dresden, Museum of Mineralogy and Geology, Paleobotanical collection	Sf._4636	Seifhennersdorf	Acer_rueminianum
Senckenberg Natural History Collections Dresden, Museum of Mineralogy and Geology, Paleobotanical collection	Sf._4663a	Seifhennersdorf	Acer_rueminianum
Senckenberg Natural History Collections Dresden, Museum of Mineralogy and Geology, Paleobotanical collection	Sf._4665:1,2	Seifhennersdorf	Acer_rueminianum
Senckenberg Natural History Collections Dresden, Museum of Mineralogy and Geology, Paleobotanical collection	Sf._4677/5437b	Seifhennersdorf	Acer_rueminianum
Senckenberg Natural History Collections Dresden, Museum of Mineralogy and Geology, Paleobotanical collection	Sf._8166:1,2	Seifhennersdorf	Acer_rueminianum
Senckenberg Natural History Collections Dresden, Museum of Mineralogy and Geology, Paleobotanical collection	Sf._8167	Seifhennersdorf	Acer_rueminianum
Senckenberg Natural History Collections Dresden, Museum of Mineralogy and Geology, Paleobotanical collection	Sf._8355	Seifhennersdorf	Acer_rueminianum
Senckenberg Natural History Collections Dresden, Museum of Mineralogy and Geology, Paleobotanical collection	Sf._8356	Seifhennersdorf	Acer_rueminianum
Senckenberg Natural History Collections Dresden, Museum of Mineralogy and Geology, Paleobotanical collection	Sf._8357:1,2	Seifhennersdorf	Acer_rueminianum
Senckenberg Natural History Collections Dresden, Museum of Mineralogy and Geology, Paleobotanical collection	Sf._8597	Seifhennersdorf	Acer_rueminianum
Senckenberg Natural History Collections Dresden, Museum of Mineralogy and Geology, Paleobotanical collection	Sf._20 (II)	Seifhennersdorf	Acer_sp
Senckenberg Natural History Collections Dresden, Museum of Mineralogy and Geology, Paleobotanical collection	Sf._57	Seifhennersdorf	Acer_sp
Senckenberg Natural History Collections Dresden, Museum of Mineralogy and Geology, Paleobotanical collection	Sf._70 (I)	Seifhennersdorf	Acer_sp
Senckenberg Natural History Collections Dresden, Museum of Mineralogy and Geology, Paleobotanical collection	Sf._78	Seifhennersdorf	Acer_sp
Senckenberg Natural History Collections Dresden, Museum of Mineralogy and Geology, Paleobotanical collection	Sf._79	Seifhennersdorf	Acer_sp
Senckenberg Natural History Collections Dresden, Museum of Mineralogy and Geology, Paleobotanical collection	Sf._2065	Seifhennersdorf	Acer_sp
Senckenberg Natural History Collections Dresden, Museum of Mineralogy and Geology, Paleobotanical collection	Sf._2241	Seifhennersdorf	Acer_sp
Senckenberg Natural History Collections Dresden, Museum of Mineralogy and Geology, Paleobotanical collection	Sf._2277:1,2	Seifhennersdorf	Acer_sp
Senckenberg Natural History Collections Dresden, Museum of Mineralogy and Geology, Paleobotanical collection	Sf._2297	Seifhennersdorf	Acer_sp
Senckenberg Natural History Collections Dresden, Museum of Mineralogy and Geology, Paleobotanical collection	Sf._2856	Seifhennersdorf	Acer_sp
Senckenberg Natural History Collections Dresden, Museum of Mineralogy and Geology, Paleobotanical collection	Sf._2992	Seifhennersdorf	Acer_sp
Senckenberg Natural History Collections Dresden, Museum of Mineralogy and Geology, Paleobotanical collection	Sf._2996	Seifhennersdorf	Acer_sp
Senckenberg Natural History Collections Dresden, Museum of Mineralogy and Geology, Paleobotanical collection	Sf._2997	Seifhennersdorf	Acer_sp
Senckenberg Natural History Collections Dresden, Museum of Mineralogy and Geology, Paleobotanical collection	Sf._2998:1,2	Seifhennersdorf	Acer_sp
Senckenberg Natural History Collections Dresden, Museum of Mineralogy and Geology, Paleobotanical collection	Sf._3000	Seifhennersdorf	Acer_sp
Senckenberg Natural History Collections Dresden, Museum of Mineralogy and Geology, Paleobotanical collection	Sf._3003	Seifhennersdorf	Acer_sp
Senckenberg Natural History Collections Dresden, Museum of Mineralogy and Geology, Paleobotanical collection	Sf._3004/2999	Seifhennersdorf	Acer_sp
Senckenberg Natural History Collections Dresden, Museum of Mineralogy and Geology, Paleobotanical collection	Sf._3007	Seifhennersdorf	Acer_sp
Senckenberg Natural History Collections Dresden, Museum of Mineralogy and Geology, Paleobotanical collection	Sf._3009	Seifhennersdorf	Acer_sp
Senckenberg Natural History Collections Dresden, Museum of Mineralogy and Geology, Paleobotanical collection	Sf._3010	Seifhennersdorf	Acer_sp
Senckenberg Natural History Collections Dresden, Museum of Mineralogy and Geology, Paleobotanical collection	Sf._3016	Seifhennersdorf	Acer_sp
Senckenberg Natural History Collections Dresden, Museum of Mineralogy and Geology, Paleobotanical collection	Sf._3018	Seifhennersdorf	Acer_sp
Senckenberg Natural History Collections Dresden, Museum of Mineralogy and Geology, Paleobotanical collection	Sf._3019	Seifhennersdorf	Acer_sp
Senckenberg Natural History Collections Dresden, Museum of Mineralogy and Geology, Paleobotanical collection	Sf._3021	Seifhennersdorf	Acer_sp
Senckenberg Natural History Collections Dresden, Museum of Mineralogy and Geology, Paleobotanical collection	Sf._3023:1,2a	Seifhennersdorf	Acer_sp
Senckenberg Natural History Collections Dresden, Museum of Mineralogy and Geology, Paleobotanical collection	Sf._3024	Seifhennersdorf	Acer_sp
Senckenberg Natural History Collections Dresden, Museum of Mineralogy and Geology, Paleobotanical collection	Sf._3025	Seifhennersdorf	Acer_sp
Senckenberg Natural History Collections Dresden, Museum of Mineralogy and Geology, Paleobotanical collection	Sf._3026	Seifhennersdorf	Acer_sp
Senckenberg Natural History Collections Dresden, Museum of Mineralogy and Geology, Paleobotanical collection	Sf._3027	Seifhennersdorf	Acer_sp
Senckenberg Natural History Collections Dresden, Museum of Mineralogy and Geology, Paleobotanical collection	Sf._3033	Seifhennersdorf	Acer_sp
Senckenberg Natural History Collections Dresden, Museum of Mineralogy and Geology, Paleobotanical collection	Sf._3034:1,2	Seifhennersdorf	Acer_sp
Senckenberg Natural History Collections Dresden, Museum of Mineralogy and Geology, Paleobotanical collection	Sf._3035:1,2	Seifhennersdorf	Acer_sp
Senckenberg Natural History Collections Dresden, Museum of Mineralogy and Geology, Paleobotanical collection	Sf._3036	Seifhennersdorf	Acer_sp
Senckenberg Natural History Collections Dresden, Museum of Mineralogy and Geology, Paleobotanical collection	Sf._3037:1,2	Seifhennersdorf	Acer_sp
Senckenberg Natural History Collections Dresden, Museum of Mineralogy and Geology, Paleobotanical collection	Sf._3043	Seifhennersdorf	Acer_sp
Senckenberg Natural History Collections Dresden, Museum of Mineralogy and Geology, Paleobotanical collection	Sf._3046	Seifhennersdorf	Acer_sp
Senckenberg Natural History Collections Dresden, Museum of Mineralogy and Geology, Paleobotanical collection	Sf._3049:1,2	Seifhennersdorf	Acer_sp
Senckenberg Natural History Collections Dresden, Museum of Mineralogy and Geology, Paleobotanical collection	Sf._3051	Seifhennersdorf	Acer_sp
Senckenberg Natural History Collections Dresden, Museum of Mineralogy and Geology, Paleobotanical collection	Sf._3054	Seifhennersdorf	Acer_sp
Senckenberg Natural History Collections Dresden, Museum of Mineralogy and Geology, Paleobotanical collection	Sf._3224	Seifhennersdorf	Acer_sp
Senckenberg Natural History Collections Dresden, Museum of Mineralogy and Geology, Paleobotanical collection	Sf._3430:1,2	Seifhennersdorf	Acer_sp
Senckenberg Natural History Collections Dresden, Museum of Mineralogy and Geology, Paleobotanical collection	Sf._3715:1,2	Seifhennersdorf	Acer_sp
Senckenberg Natural History Collections Dresden, Museum of Mineralogy and Geology, Paleobotanical collection	Sf._3716:1,2	Seifhennersdorf	Acer_sp
Senckenberg Natural History Collections Dresden, Museum of Mineralogy and Geology, Paleobotanical collection	Sf._3720:1,2	Seifhennersdorf	Acer_sp
Senckenberg Natural History Collections Dresden, Museum of Mineralogy and Geology, Paleobotanical collection	Sf._3749	Seifhennersdorf	Acer_sp
Senckenberg Natural History Collections Dresden, Museum of Mineralogy and Geology, Paleobotanical collection	Sf._3759	Seifhennersdorf	Acer_sp
Senckenberg Natural History Collections Dresden, Museum of Mineralogy and Geology, Paleobotanical collection	Sf._3762	Seifhennersdorf	Acer_sp
Senckenberg Natural History Collections Dresden, Museum of Mineralogy and Geology, Paleobotanical collection	Sf._3763	Seifhennersdorf	Acer_sp
Senckenberg Natural History Collections Dresden, Museum of Mineralogy and Geology, Paleobotanical collection	Sf._3771	Seifhennersdorf	Acer_sp
Senckenberg Natural History Collections Dresden, Museum of Mineralogy and Geology, Paleobotanical collection	Sf._4008	Seifhennersdorf	Acer_sp
Senckenberg Natural History Collections Dresden, Museum of Mineralogy and Geology, Paleobotanical collection	Sf._4020	Seifhennersdorf	Acer_sp
Senckenberg Natural History Collections Dresden, Museum of Mineralogy and Geology, Paleobotanical collection	Sf._4060:1,2	Seifhennersdorf	Acer_sp
Senckenberg Natural History Collections Dresden, Museum of Mineralogy and Geology, Paleobotanical collection	Sf._4081:1,2	Seifhennersdorf	Acer_sp
Senckenberg Natural History Collections Dresden, Museum of Mineralogy and Geology, Paleobotanical collection	Sf._4117	Seifhennersdorf	Acer_sp
Senckenberg Natural History Collections Dresden, Museum of Mineralogy and Geology, Paleobotanical collection	Sf._4123	Seifhennersdorf	Acer_sp
Senckenberg Natural History Collections Dresden, Museum of Mineralogy and Geology, Paleobotanical collection	Sf._4161	Seifhennersdorf	Acer_sp
Senckenberg Natural History Collections Dresden, Museum of Mineralogy and Geology, Paleobotanical collection	Sf._4237	Seifhennersdorf	Acer_sp
Senckenberg Natural History Collections Dresden, Museum of Mineralogy and Geology, Paleobotanical collection	Sf._4349:1,2	Seifhennersdorf	Acer_sp
Senckenberg Natural History Collections Dresden, Museum of Mineralogy and Geology, Paleobotanical collection	Sf._4350	Seifhennersdorf	Acer_sp
Senckenberg Natural History Collections Dresden, Museum of Mineralogy and Geology, Paleobotanical collection	Sf._4471	Seifhennersdorf	Acer_sp
Senckenberg Natural History Collections Dresden, Museum of Mineralogy and Geology, Paleobotanical collection	Sf._4473	Seifhennersdorf	Acer_sp
Senckenberg Natural History Collections Dresden, Museum of Mineralogy and Geology, Paleobotanical collection	Sf._4475	Seifhennersdorf	Acer_sp
Senckenberg Natural History Collections Dresden, Museum of Mineralogy and Geology, Paleobotanical collection	Sf._4479:1,2	Seifhennersdorf	Acer_sp
Senckenberg Natural History Collections Dresden, Museum of Mineralogy and Geology, Paleobotanical collection	Sf._4481:1,2	Seifhennersdorf	Acer_sp
Senckenberg Natural History Collections Dresden, Museum of Mineralogy and Geology, Paleobotanical collection	Sf._4485	Seifhennersdorf	Acer_sp
Senckenberg Natural History Collections Dresden, Museum of Mineralogy and Geology, Paleobotanical collection	Sf._4488	Seifhennersdorf	Acer_sp
Senckenberg Natural History Collections Dresden, Museum of Mineralogy and Geology, Paleobotanical collection	Sf._4490	Seifhennersdorf	Acer_sp
Senckenberg Natural History Collections Dresden, Museum of Mineralogy and Geology, Paleobotanical collection	Sf._4491	Seifhennersdorf	Acer_sp
Senckenberg Natural History Collections Dresden, Museum of Mineralogy and Geology, Paleobotanical collection	Sf._4498	Seifhennersdorf	Acer_sp
Senckenberg Natural History Collections Dresden, Museum of Mineralogy and Geology, Paleobotanical collection	Sf._4501	Seifhennersdorf	Acer_sp
Senckenberg Natural History Collections Dresden, Museum of Mineralogy and Geology, Paleobotanical collection	Sf._4502	Seifhennersdorf	Acer_sp
Senckenberg Natural History Collections Dresden, Museum of Mineralogy and Geology, Paleobotanical collection	Sf._4505/4506	Seifhennersdorf	Acer_sp
Senckenberg Natural History Collections Dresden, Museum of Mineralogy and Geology, Paleobotanical collection	Sf._4507	Seifhennersdorf	Acer_sp
Senckenberg Natural History Collections Dresden, Museum of Mineralogy and Geology, Paleobotanical collection	Sf._4510c	Seifhennersdorf	Acer_sp
Senckenberg Natural History Collections Dresden, Museum of Mineralogy and Geology, Paleobotanical collection	Sf._4513	Seifhennersdorf	Acer_sp
Senckenberg Natural History Collections Dresden, Museum of Mineralogy and Geology, Paleobotanical collection	Sf._4573/4568	Seifhennersdorf	Acer_sp
Senckenberg Natural History Collections Dresden, Museum of Mineralogy and Geology, Paleobotanical collection	Sf._4576	Seifhennersdorf	Acer_sp
Senckenberg Natural History Collections Dresden, Museum of Mineralogy and Geology, Paleobotanical collection	Sf._4593	Seifhennersdorf	Acer_sp
Senckenberg Natural History Collections Dresden, Museum of Mineralogy and Geology, Paleobotanical collection	Sf._4594:1,2a	Seifhennersdorf	Acer_sp
Senckenberg Natural History Collections Dresden, Museum of Mineralogy and Geology, Paleobotanical collection	Sf._4596	Seifhennersdorf	Acer_sp
Senckenberg Natural History Collections Dresden, Museum of Mineralogy and Geology, Paleobotanical collection	Sf._4597	Seifhennersdorf	Acer_sp
Senckenberg Natural History Collections Dresden, Museum of Mineralogy and Geology, Paleobotanical collection	Sf._4602	Seifhennersdorf	Acer_sp
Senckenberg Natural History Collections Dresden, Museum of Mineralogy and Geology, Paleobotanical collection	Sf._4609	Seifhennersdorf	Acer_sp
Senckenberg Natural History Collections Dresden, Museum of Mineralogy and Geology, Paleobotanical collection	Sf._4615	Seifhennersdorf	Acer_sp
Senckenberg Natural History Collections Dresden, Museum of Mineralogy and Geology, Paleobotanical collection	Sf._4618	Seifhennersdorf	Acer_sp
Senckenberg Natural History Collections Dresden, Museum of Mineralogy and Geology, Paleobotanical collection	Sf._4619/4614	Seifhennersdorf	Acer_sp
Senckenberg Natural History Collections Dresden, Museum of Mineralogy and Geology, Paleobotanical collection	Sf._4627	Seifhennersdorf	Acer_sp
Senckenberg Natural History Collections Dresden, Museum of Mineralogy and Geology, Paleobotanical collection	Sf._4634	Seifhennersdorf	Acer_sp
Senckenberg Natural History Collections Dresden, Museum of Mineralogy and Geology, Paleobotanical collection	Sf._4637	Seifhennersdorf	Acer_sp
Senckenberg Natural History Collections Dresden, Museum of Mineralogy and Geology, Paleobotanical collection	Sf._4638	Seifhennersdorf	Acer_sp
Senckenberg Natural History Collections Dresden, Museum of Mineralogy and Geology, Paleobotanical collection	Sf._4639	Seifhennersdorf	Acer_sp
Senckenberg Natural History Collections Dresden, Museum of Mineralogy and Geology, Paleobotanical collection	Sf._4640	Seifhennersdorf	Acer_sp
Senckenberg Natural History Collections Dresden, Museum of Mineralogy and Geology, Paleobotanical collection	Sf._4641	Seifhennersdorf	Acer_sp
Senckenberg Natural History Collections Dresden, Museum of Mineralogy and Geology, Paleobotanical collection	Sf._4642	Seifhennersdorf	Acer_sp
Senckenberg Natural History Collections Dresden, Museum of Mineralogy and Geology, Paleobotanical collection	Sf._4645	Seifhennersdorf	Acer_sp
Senckenberg Natural History Collections Dresden, Museum of Mineralogy and Geology, Paleobotanical collection	Sf._4650	Seifhennersdorf	Acer_sp
Senckenberg Natural History Collections Dresden, Museum of Mineralogy and Geology, Paleobotanical collection	Sf._4652	Seifhennersdorf	Acer_sp
Senckenberg Natural History Collections Dresden, Museum of Mineralogy and Geology, Paleobotanical collection	Sf._4654	Seifhennersdorf	Acer_sp
Senckenberg Natural History Collections Dresden, Museum of Mineralogy and Geology, Paleobotanical collection	Sf._4657	Seifhennersdorf	Acer_sp
Senckenberg Natural History Collections Dresden, Museum of Mineralogy and Geology, Paleobotanical collection	Sf._4658	Seifhennersdorf	Acer_sp
Senckenberg Natural History Collections Dresden, Museum of Mineralogy and Geology, Paleobotanical collection	Sf._4659	Seifhennersdorf	Acer_sp
Senckenberg Natural History Collections Dresden, Museum of Mineralogy and Geology, Paleobotanical collection	Sf._4660	Seifhennersdorf	Acer_sp
Senckenberg Natural History Collections Dresden, Museum of Mineralogy and Geology, Paleobotanical collection	Sf._4664	Seifhennersdorf	Acer_sp
Senckenberg Natural History Collections Dresden, Museum of Mineralogy and Geology, Paleobotanical collection	Sf._4674	Seifhennersdorf	Acer_sp
Senckenberg Natural History Collections Dresden, Museum of Mineralogy and Geology, Paleobotanical collection	Sf._5534	Seifhennersdorf	Acer_sp
Senckenberg Natural History Collections Dresden, Museum of Mineralogy and Geology, Paleobotanical collection	Sf._5664	Seifhennersdorf	Acer_sp
Senckenberg Natural History Collections Dresden, Museum of Mineralogy and Geology, Paleobotanical collection	Sf._6397	Seifhennersdorf	Acer_sp
Senckenberg Natural History Collections Dresden, Museum of Mineralogy and Geology, Paleobotanical collection	Sf._7556b	Seifhennersdorf	Acer_sp
Senckenberg Natural History Collections Dresden, Museum of Mineralogy and Geology, Paleobotanical collection	Sf._7937b	Seifhennersdorf	Acer_sp
Senckenberg Natural History Collections Dresden, Museum of Mineralogy and Geology, Paleobotanical collection	Sf._8038:1,2	Seifhennersdorf	Acer_sp
Senckenberg Natural History Collections Dresden, Museum of Mineralogy and Geology, Paleobotanical collection	Sf._8142:1,2	Seifhennersdorf	Acer_sp
Senckenberg Natural History Collections Dresden, Museum of Mineralogy and Geology, Paleobotanical collection	Sf._8144:1,2	Seifhennersdorf	Acer_sp
Senckenberg Natural History Collections Dresden, Museum of Mineralogy and Geology, Paleobotanical collection	Sf._8150	Seifhennersdorf	Acer_sp
Senckenberg Natural History Collections Dresden, Museum of Mineralogy and Geology, Paleobotanical collection	Sf._8170/8659	Seifhennersdorf	Acer_sp
Senckenberg Natural History Collections Dresden, Museum of Mineralogy and Geology, Paleobotanical collection	Sf._8185	Seifhennersdorf	Acer_sp
Senckenberg Natural History Collections Dresden, Museum of Mineralogy and Geology, Paleobotanical collection	Sf._8351	Seifhennersdorf	Acer_sp
Senckenberg Natural History Collections Dresden, Museum of Mineralogy and Geology, Paleobotanical collection	Sf._8354	Seifhennersdorf	Acer_sp
Senckenberg Natural History Collections Dresden, Museum of Mineralogy and Geology, Paleobotanical collection	Sf._8377	Seifhennersdorf	Acer_sp
Senckenberg Natural History Collections Dresden, Museum of Mineralogy and Geology, Paleobotanical collection	Sf._8386	Seifhennersdorf	Acer_sp
Senckenberg Natural History Collections Dresden, Museum of Mineralogy and Geology, Paleobotanical collection	Sf._8387	Seifhennersdorf	Acer_sp
Senckenberg Natural History Collections Dresden, Museum of Mineralogy and Geology, Paleobotanical collection	Sf._8388	Seifhennersdorf	Acer_sp
Senckenberg Natural History Collections Dresden, Museum of Mineralogy and Geology, Paleobotanical collection	Sf._8390	Seifhennersdorf	Acer_sp
Senckenberg Natural History Collections Dresden, Museum of Mineralogy and Geology, Paleobotanical collection	Sf._8391/8389	Seifhennersdorf	Acer_sp
Senckenberg Natural History Collections Dresden, Museum of Mineralogy and Geology, Paleobotanical collection	Sf._8392	Seifhennersdorf	Acer_sp
Senckenberg Natural History Collections Dresden, Museum of Mineralogy and Geology, Paleobotanical collection	Sf._8393	Seifhennersdorf	Acer_sp
Senckenberg Natural History Collections Dresden, Museum of Mineralogy and Geology, Paleobotanical collection	Sf._8394	Seifhennersdorf	Acer_sp
Senckenberg Natural History Collections Dresden, Museum of Mineralogy and Geology, Paleobotanical collection	Sf._8395	Seifhennersdorf	Acer_sp
Senckenberg Natural History Collections Dresden, Museum of Mineralogy and Geology, Paleobotanical collection	Sf._8398	Seifhennersdorf	Acer_sp
Senckenberg Natural History Collections Dresden, Museum of Mineralogy and Geology, Paleobotanical collection	Sf._8399	Seifhennersdorf	Acer_sp
Senckenberg Natural History Collections Dresden, Museum of Mineralogy and Geology, Paleobotanical collection	Sf._8418	Seifhennersdorf	Acer_sp
Senckenberg Natural History Collections Dresden, Museum of Mineralogy and Geology, Paleobotanical collection	Sf._8579	Seifhennersdorf	Acer_sp
Senckenberg Natural History Collections Dresden, Museum of Mineralogy and Geology, Paleobotanical collection	Sf._8639	Seifhennersdorf	Acer_sp
Senckenberg Natural History Collections Dresden, Museum of Mineralogy and Geology, Paleobotanical collection	Sf._8658	Seifhennersdorf	Acer_sp
Senckenberg Natural History Collections Dresden, Museum of Mineralogy and Geology, Paleobotanical collection	Sf._8691	Seifhennersdorf	Acer_sp
Senckenberg Natural History Collections Dresden, Museum of Mineralogy and Geology, Paleobotanical collection	Sf._8	Seifhennersdorf	Ailanthus_prescheri
Senckenberg Natural History Collections Dresden, Museum of Mineralogy and Geology, Paleobotanical collection	Sf._462	Seifhennersdorf	Ailanthus_prescheri
Senckenberg Natural History Collections Dresden, Museum of Mineralogy and Geology, Paleobotanical collection	Sf._968:1,2	Seifhennersdorf	Ailanthus_prescheri
Senckenberg Natural History Collections Dresden, Museum of Mineralogy and Geology, Paleobotanical collection	Sf._1256:1,2	Seifhennersdorf	Ailanthus_prescheri
Senckenberg Natural History Collections Dresden, Museum of Mineralogy and Geology, Paleobotanical collection	Sf._1341	Seifhennersdorf	Ailanthus_prescheri
Senckenberg Natural History Collections Dresden, Museum of Mineralogy and Geology, Paleobotanical collection	Sf._1415	Seifhennersdorf	Ailanthus_prescheri
Senckenberg Natural History Collections Dresden, Museum of Mineralogy and Geology, Paleobotanical collection	Sf._2244	Seifhennersdorf	Ailanthus_prescheri
Senckenberg Natural History Collections Dresden, Museum of Mineralogy and Geology, Paleobotanical collection	Sf._2261:1,2	Seifhennersdorf	Ailanthus_prescheri
Senckenberg Natural History Collections Dresden, Museum of Mineralogy and Geology, Paleobotanical collection	Sf._2265	Seifhennersdorf	Ailanthus_prescheri
Senckenberg Natural History Collections Dresden, Museum of Mineralogy and Geology, Paleobotanical collection	Sf._2286	Seifhennersdorf	Ailanthus_prescheri
Senckenberg Natural History Collections Dresden, Museum of Mineralogy and Geology, Paleobotanical collection	Sf._2299:1,2	Seifhennersdorf	Ailanthus_prescheri
Senckenberg Natural History Collections Dresden, Museum of Mineralogy and Geology, Paleobotanical collection	Sf._2300:1,2	Seifhennersdorf	Ailanthus_prescheri
Senckenberg Natural History Collections Dresden, Museum of Mineralogy and Geology, Paleobotanical collection	Sf._2302	Seifhennersdorf	Ailanthus_prescheri
Senckenberg Natural History Collections Dresden, Museum of Mineralogy and Geology, Paleobotanical collection	Sf._2304:1,2	Seifhennersdorf	Ailanthus_prescheri
Senckenberg Natural History Collections Dresden, Museum of Mineralogy and Geology, Paleobotanical collection	Sf._2308	Seifhennersdorf	Ailanthus_prescheri
Senckenberg Natural History Collections Dresden, Museum of Mineralogy and Geology, Paleobotanical collection	Sf._2431	Seifhennersdorf	Ailanthus_prescheri
Senckenberg Natural History Collections Dresden, Museum of Mineralogy and Geology, Paleobotanical collection	Sf._4509	Seifhennersdorf	Ailanthus_prescheri
Senckenberg Natural History Collections Dresden, Museum of Mineralogy and Geology, Paleobotanical collection	Sf._5573/6519	Seifhennersdorf	Ailanthus_prescheri
Senckenberg Natural History Collections Dresden, Museum of Mineralogy and Geology, Paleobotanical collection	Sf._6532	Seifhennersdorf	Ailanthus_prescheri
Senckenberg Natural History Collections Dresden, Museum of Mineralogy and Geology, Paleobotanical collection	Sf._6520a/6528	Seifhennersdorf	Ailanthus_prescheri
Senckenberg Natural History Collections Dresden, Museum of Mineralogy and Geology, Paleobotanical collection	Sf._6523	Seifhennersdorf	Ailanthus_prescheri
Senckenberg Natural History Collections Dresden, Museum of Mineralogy and Geology, Paleobotanical collection	Sf._6524	Seifhennersdorf	Ailanthus_prescheri
Senckenberg Natural History Collections Dresden, Museum of Mineralogy and Geology, Paleobotanical collection	Sf._6525	Seifhennersdorf	Ailanthus_prescheri
Senckenberg Natural History Collections Dresden, Museum of Mineralogy and Geology, Paleobotanical collection	Sf._6526	Seifhennersdorf	Ailanthus_prescheri
Senckenberg Natural History Collections Dresden, Museum of Mineralogy and Geology, Paleobotanical collection	Sf._6529	Seifhennersdorf	Ailanthus_prescheri
Senckenberg Natural History Collections Dresden, Museum of Mineralogy and Geology, Paleobotanical collection	Sf._6533	Seifhennersdorf	Ailanthus_prescheri
Senckenberg Natural History Collections Dresden, Museum of Mineralogy and Geology, Paleobotanical collection	Sf._8287 (A2/a/7)	Seifhennersdorf	Ailanthus_prescheri
Senckenberg Natural History Collections Dresden, Museum of Mineralogy and Geology, Paleobotanical collection	Sf._8407	Seifhennersdorf	Ailanthus_prescheri
Senckenberg Natural History Collections Dresden, Museum of Mineralogy and Geology, Paleobotanical collection	Sf._8592	Seifhennersdorf	Ailanthus_prescheri
Senckenberg Natural History Collections Dresden, Museum of Mineralogy and Geology, Paleobotanical collection	Sf._2313	Seifhennersdorf	Alnus_gaudinii
Senckenberg Natural History Collections Dresden, Museum of Mineralogy and Geology, Paleobotanical collection	Sf._2715	Seifhennersdorf	Alnus_gaudinii
Senckenberg Natural History Collections Dresden, Museum of Mineralogy and Geology, Paleobotanical collection	Sf._4443	Seifhennersdorf	Alnus_gaudinii
Senckenberg Natural History Collections Dresden, Museum of Mineralogy and Geology, Paleobotanical collection	Sf._4465	Seifhennersdorf	Alnus_gaudinii
Senckenberg Natural History Collections Dresden, Museum of Mineralogy and Geology, Paleobotanical collection	Sf._4555	Seifhennersdorf	Alnus_gaudinii
Senckenberg Natural History Collections Dresden, Museum of Mineralogy and Geology, Paleobotanical collection	Sf._5331:1,2	Seifhennersdorf	Alnus_gaudinii
Senckenberg Natural History Collections Dresden, Museum of Mineralogy and Geology, Paleobotanical collection	Sf._5352	Seifhennersdorf	Alnus_gaudinii
Senckenberg Natural History Collections Dresden, Museum of Mineralogy and Geology, Paleobotanical collection	Sf._6058	Seifhennersdorf	Alnus_gaudinii
Senckenberg Natural History Collections Dresden, Museum of Mineralogy and Geology, Paleobotanical collection	Sf._6160	Seifhennersdorf	Alnus_gaudinii
Senckenberg Natural History Collections Dresden, Museum of Mineralogy and Geology, Paleobotanical collection	Sf._6197	Seifhennersdorf	Alnus_gaudinii
Senckenberg Natural History Collections Dresden, Museum of Mineralogy and Geology, Paleobotanical collection	Sf._6226:1,2	Seifhennersdorf	Alnus_gaudinii
Senckenberg Natural History Collections Dresden, Museum of Mineralogy and Geology, Paleobotanical collection	Sf._6406	Seifhennersdorf	Alnus_gaudinii
Senckenberg Natural History Collections Dresden, Museum of Mineralogy and Geology, Paleobotanical collection	Sf._6411	Seifhennersdorf	Alnus_gaudinii
Senckenberg Natural History Collections Dresden, Museum of Mineralogy and Geology, Paleobotanical collection	Sf._6426	Seifhennersdorf	Alnus_gaudinii
Senckenberg Natural History Collections Dresden, Museum of Mineralogy and Geology, Paleobotanical collection	Sf._6603	Seifhennersdorf	Alnus_gaudinii
Senckenberg Natural History Collections Dresden, Museum of Mineralogy and Geology, Paleobotanical collection	Sf._6608	Seifhennersdorf	Alnus_gaudinii
Senckenberg Natural History Collections Dresden, Museum of Mineralogy and Geology, Paleobotanical collection	Sf._7463/5541	Seifhennersdorf	Alnus_gaudinii
Senckenberg Natural History Collections Dresden, Museum of Mineralogy and Geology, Paleobotanical collection	Sf._8281	Seifhennersdorf	Alnus_gaudinii
Senckenberg Natural History Collections Dresden, Museum of Mineralogy and Geology, Paleobotanical collection	Sf._15	Seifhennersdorf	Alnus_phocaeensis
Senckenberg Natural History Collections Dresden, Museum of Mineralogy and Geology, Paleobotanical collection	Sf._1267	Seifhennersdorf	Alnus_phocaeensis
Senckenberg Natural History Collections Dresden, Museum of Mineralogy and Geology, Paleobotanical collection	Sf._3299	Seifhennersdorf	Alnus_phocaeensis
Senckenberg Natural History Collections Dresden, Museum of Mineralogy and Geology, Paleobotanical collection	Sf._3507:1,2	Seifhennersdorf	Alnus_phocaeensis
Senckenberg Natural History Collections Dresden, Museum of Mineralogy and Geology, Paleobotanical collection	Sf._4699	Seifhennersdorf	Alnus_phocaeensis
Senckenberg Natural History Collections Dresden, Museum of Mineralogy and Geology, Paleobotanical collection	Sf._7872	Seifhennersdorf	Alnus_phocaeensis
Senckenberg Natural History Collections Dresden, Museum of Mineralogy and Geology, Paleobotanical collection	Sf._2693	Seifhennersdorf	Ampelopsis_hibschii
Senckenberg Natural History Collections Dresden, Museum of Mineralogy and Geology, Paleobotanical collection	Sf._3545	Seifhennersdorf	Ampelopsis_hibschii
Senckenberg Natural History Collections Dresden, Museum of Mineralogy and Geology, Paleobotanical collection	Sf._8647	Seifhennersdorf	Ampelopsis_hibschii
Senckenberg Natural History Collections Dresden, Museum of Mineralogy and Geology, Paleobotanical collection	Sf._1352	Seifhennersdorf	Apocynophyllum_neriifolium
Senckenberg Natural History Collections Dresden, Museum of Mineralogy and Geology, Paleobotanical collection	Sf._2740	Seifhennersdorf	Apocynophyllum_neriifolium
Senckenberg Natural History Collections Dresden, Museum of Mineralogy and Geology, Paleobotanical collection	Sf._2874	Seifhennersdorf	Apocynophyllum_neriifolium
Senckenberg Natural History Collections Dresden, Museum of Mineralogy and Geology, Paleobotanical collection	Sf._6097	Seifhennersdorf	Apocynophyllum_neriifolium
Senckenberg Natural History Collections Dresden, Museum of Mineralogy and Geology, Paleobotanical collection	Sf._7547:1,2	Seifhennersdorf	Apocynophyllum_neriifolium
Senckenberg Natural History Collections Dresden, Museum of Mineralogy and Geology, Paleobotanical collection	Sf._8277	Seifhennersdorf	Apocynophyllum_neriifolium
Senckenberg Natural History Collections Dresden, Museum of Mineralogy and Geology, Paleobotanical collection	Sf._669b	Seifhennersdorf	Betulaceae_indet
Senckenberg Natural History Collections Dresden, Museum of Mineralogy and Geology, Paleobotanical collection	Sf._852:1,2b	Seifhennersdorf	Betulaceae_indet
Senckenberg Natural History Collections Dresden, Museum of Mineralogy and Geology, Paleobotanical collection	Sf._958	Seifhennersdorf	Betulaceae_indet
Senckenberg Natural History Collections Dresden, Museum of Mineralogy and Geology, Paleobotanical collection	Sf._1323	Seifhennersdorf	Betulaceae_indet
Senckenberg Natural History Collections Dresden, Museum of Mineralogy and Geology, Paleobotanical collection	Sf._1373:1,2b	Seifhennersdorf	Betulaceae_indet
Senckenberg Natural History Collections Dresden, Museum of Mineralogy and Geology, Paleobotanical collection	Sf._1614:1,2	Seifhennersdorf	Betulaceae_indet
Senckenberg Natural History Collections Dresden, Museum of Mineralogy and Geology, Paleobotanical collection	Sf._1640:1,2 (I)	Seifhennersdorf	Betulaceae_indet
Senckenberg Natural History Collections Dresden, Museum of Mineralogy and Geology, Paleobotanical collection	Sf._1648 (II)	Seifhennersdorf	Betulaceae_indet
Senckenberg Natural History Collections Dresden, Museum of Mineralogy and Geology, Paleobotanical collection	Sf._1703 (II)	Seifhennersdorf	Betulaceae_indet
Senckenberg Natural History Collections Dresden, Museum of Mineralogy and Geology, Paleobotanical collection	Sf._2053	Seifhennersdorf	Betulaceae_indet
Senckenberg Natural History Collections Dresden, Museum of Mineralogy and Geology, Paleobotanical collection	Sf._2083	Seifhennersdorf	Betulaceae_indet
Senckenberg Natural History Collections Dresden, Museum of Mineralogy and Geology, Paleobotanical collection	Sf._2088	Seifhennersdorf	Betulaceae_indet
Senckenberg Natural History Collections Dresden, Museum of Mineralogy and Geology, Paleobotanical collection	Sf._2111	Seifhennersdorf	Betulaceae_indet
Senckenberg Natural History Collections Dresden, Museum of Mineralogy and Geology, Paleobotanical collection	Sf._2141	Seifhennersdorf	Betulaceae_indet
Senckenberg Natural History Collections Dresden, Museum of Mineralogy and Geology, Paleobotanical collection	Sf._2174	Seifhennersdorf	Betulaceae_indet
Senckenberg Natural History Collections Dresden, Museum of Mineralogy and Geology, Paleobotanical collection	Sf._2180	Seifhennersdorf	Betulaceae_indet
Senckenberg Natural History Collections Dresden, Museum of Mineralogy and Geology, Paleobotanical collection	Sf._2201	Seifhennersdorf	Betulaceae_indet
Senckenberg Natural History Collections Dresden, Museum of Mineralogy and Geology, Paleobotanical collection	Sf._2396	Seifhennersdorf	Betulaceae_indet
Senckenberg Natural History Collections Dresden, Museum of Mineralogy and Geology, Paleobotanical collection	Sf._2420	Seifhennersdorf	Betulaceae_indet
Senckenberg Natural History Collections Dresden, Museum of Mineralogy and Geology, Paleobotanical collection	Sf._2943:1,2	Seifhennersdorf	Betulaceae_indet
Senckenberg Natural History Collections Dresden, Museum of Mineralogy and Geology, Paleobotanical collection	Sf._2954	Seifhennersdorf	Betulaceae_indet
Senckenberg Natural History Collections Dresden, Museum of Mineralogy and Geology, Paleobotanical collection	Sf._3313	Seifhennersdorf	Betulaceae_indet
Senckenberg Natural History Collections Dresden, Museum of Mineralogy and Geology, Paleobotanical collection	Sf._3432:1,2	Seifhennersdorf	Betulaceae_indet
Senckenberg Natural History Collections Dresden, Museum of Mineralogy and Geology, Paleobotanical collection	Sf._4680	Seifhennersdorf	Betulaceae_indet
Senckenberg Natural History Collections Dresden, Museum of Mineralogy and Geology, Paleobotanical collection	Sf._4688	Seifhennersdorf	Betulaceae_indet
Senckenberg Natural History Collections Dresden, Museum of Mineralogy and Geology, Paleobotanical collection	Sf._4695	Seifhennersdorf	Betulaceae_indet
Senckenberg Natural History Collections Dresden, Museum of Mineralogy and Geology, Paleobotanical collection	Sf._4696	Seifhennersdorf	Betulaceae_indet
Senckenberg Natural History Collections Dresden, Museum of Mineralogy and Geology, Paleobotanical collection	Sf._4704	Seifhennersdorf	Betulaceae_indet
Senckenberg Natural History Collections Dresden, Museum of Mineralogy and Geology, Paleobotanical collection	Sf._4715:1,2	Seifhennersdorf	Betulaceae_indet
Senckenberg Natural History Collections Dresden, Museum of Mineralogy and Geology, Paleobotanical collection	Sf._4721	Seifhennersdorf	Betulaceae_indet
Senckenberg Natural History Collections Dresden, Museum of Mineralogy and Geology, Paleobotanical collection	Sf._4723	Seifhennersdorf	Betulaceae_indet
Senckenberg Natural History Collections Dresden, Museum of Mineralogy and Geology, Paleobotanical collection	Sf._4728	Seifhennersdorf	Betulaceae_indet
Senckenberg Natural History Collections Dresden, Museum of Mineralogy and Geology, Paleobotanical collection	Sf._4730	Seifhennersdorf	Betulaceae_indet
Senckenberg Natural History Collections Dresden, Museum of Mineralogy and Geology, Paleobotanical collection	Sf._4732	Seifhennersdorf	Betulaceae_indet
Senckenberg Natural History Collections Dresden, Museum of Mineralogy and Geology, Paleobotanical collection	Sf._4733	Seifhennersdorf	Betulaceae_indet
Senckenberg Natural History Collections Dresden, Museum of Mineralogy and Geology, Paleobotanical collection	Sf._4735	Seifhennersdorf	Betulaceae_indet
Senckenberg Natural History Collections Dresden, Museum of Mineralogy and Geology, Paleobotanical collection	Sf._4743	Seifhennersdorf	Betulaceae_indet
Senckenberg Natural History Collections Dresden, Museum of Mineralogy and Geology, Paleobotanical collection	Sf._4753	Seifhennersdorf	Betulaceae_indet
Senckenberg Natural History Collections Dresden, Museum of Mineralogy and Geology, Paleobotanical collection	Sf._4765	Seifhennersdorf	Betulaceae_indet
Senckenberg Natural History Collections Dresden, Museum of Mineralogy and Geology, Paleobotanical collection	Sf._4778	Seifhennersdorf	Betulaceae_indet
Senckenberg Natural History Collections Dresden, Museum of Mineralogy and Geology, Paleobotanical collection	Sf._4813	Seifhennersdorf	Betulaceae_indet
Senckenberg Natural History Collections Dresden, Museum of Mineralogy and Geology, Paleobotanical collection	Sf._4817	Seifhennersdorf	Betulaceae_indet
Senckenberg Natural History Collections Dresden, Museum of Mineralogy and Geology, Paleobotanical collection	Sf._4822	Seifhennersdorf	Betulaceae_indet
Senckenberg Natural History Collections Dresden, Museum of Mineralogy and Geology, Paleobotanical collection	Sf._4830	Seifhennersdorf	Betulaceae_indet
Senckenberg Natural History Collections Dresden, Museum of Mineralogy and Geology, Paleobotanical collection	Sf._4864a	Seifhennersdorf	Betulaceae_indet
Senckenberg Natural History Collections Dresden, Museum of Mineralogy and Geology, Paleobotanical collection	Sf._4916	Seifhennersdorf	Betulaceae_indet
Senckenberg Natural History Collections Dresden, Museum of Mineralogy and Geology, Paleobotanical collection	Sf._4946	Seifhennersdorf	Betulaceae_indet
Senckenberg Natural History Collections Dresden, Museum of Mineralogy and Geology, Paleobotanical collection	Sf._4986:1,2	Seifhennersdorf	Betulaceae_indet
Senckenberg Natural History Collections Dresden, Museum of Mineralogy and Geology, Paleobotanical collection	Sf._5033	Seifhennersdorf	Betulaceae_indet
Senckenberg Natural History Collections Dresden, Museum of Mineralogy and Geology, Paleobotanical collection	Sf._5056:1,2	Seifhennersdorf	Betulaceae_indet
Senckenberg Natural History Collections Dresden, Museum of Mineralogy and Geology, Paleobotanical collection	Sf._5130	Seifhennersdorf	Betulaceae_indet
Senckenberg Natural History Collections Dresden, Museum of Mineralogy and Geology, Paleobotanical collection	Sf._5165	Seifhennersdorf	Betulaceae_indet
Senckenberg Natural History Collections Dresden, Museum of Mineralogy and Geology, Paleobotanical collection	Sf._5196	Seifhennersdorf	Betulaceae_indet
Senckenberg Natural History Collections Dresden, Museum of Mineralogy and Geology, Paleobotanical collection	Sf._5281	Seifhennersdorf	Betulaceae_indet
Senckenberg Natural History Collections Dresden, Museum of Mineralogy and Geology, Paleobotanical collection	Sf._5381b	Seifhennersdorf	Betulaceae_indet
Senckenberg Natural History Collections Dresden, Museum of Mineralogy and Geology, Paleobotanical collection	Sf._6085b	Seifhennersdorf	Betulaceae_indet
Senckenberg Natural History Collections Dresden, Museum of Mineralogy and Geology, Paleobotanical collection	Sf._8098	Seifhennersdorf	Betulaceae_indet
Senckenberg Natural History Collections Dresden, Museum of Mineralogy and Geology, Paleobotanical collection	Sf._669:1,4a	Seifhennersdorf	Betula_alboides
Senckenberg Natural History Collections Dresden, Museum of Mineralogy and Geology, Paleobotanical collection	Sf._1371:1,2	Seifhennersdorf	Betula_alboides
Senckenberg Natural History Collections Dresden, Museum of Mineralogy and Geology, Paleobotanical collection	Sf._1643 (II)	Seifhennersdorf	Betula_alboides
Senckenberg Natural History Collections Dresden, Museum of Mineralogy and Geology, Paleobotanical collection	Sf._1647	Seifhennersdorf	Betula_alboides
Senckenberg Natural History Collections Dresden, Museum of Mineralogy and Geology, Paleobotanical collection	Sf._1705	Seifhennersdorf	Betula_alboides
Senckenberg Natural History Collections Dresden, Museum of Mineralogy and Geology, Paleobotanical collection	Sf._1832	Seifhennersdorf	Betula_alboides
Senckenberg Natural History Collections Dresden, Museum of Mineralogy and Geology, Paleobotanical collection	Sf._1911	Seifhennersdorf	Betula_alboides
Senckenberg Natural History Collections Dresden, Museum of Mineralogy and Geology, Paleobotanical collection	Sf._1998	Seifhennersdorf	Betula_alboides
Senckenberg Natural History Collections Dresden, Museum of Mineralogy and Geology, Paleobotanical collection	Sf._2140	Seifhennersdorf	Betula_alboides
Senckenberg Natural History Collections Dresden, Museum of Mineralogy and Geology, Paleobotanical collection	Sf._2171	Seifhennersdorf	Betula_alboides
Senckenberg Natural History Collections Dresden, Museum of Mineralogy and Geology, Paleobotanical collection	Sf._2178	Seifhennersdorf	Betula_alboides
Senckenberg Natural History Collections Dresden, Museum of Mineralogy and Geology, Paleobotanical collection	Sf._2197	Seifhennersdorf	Betula_alboides
Senckenberg Natural History Collections Dresden, Museum of Mineralogy and Geology, Paleobotanical collection	Sf._2198	Seifhennersdorf	Betula_alboides
Senckenberg Natural History Collections Dresden, Museum of Mineralogy and Geology, Paleobotanical collection	Sf._2200	Seifhennersdorf	Betula_alboides
Senckenberg Natural History Collections Dresden, Museum of Mineralogy and Geology, Paleobotanical collection	Sf._2210	Seifhennersdorf	Betula_alboides
Senckenberg Natural History Collections Dresden, Museum of Mineralogy and Geology, Paleobotanical collection	Sf._2217	Seifhennersdorf	Betula_alboides
Senckenberg Natural History Collections Dresden, Museum of Mineralogy and Geology, Paleobotanical collection	Sf._2220	Seifhennersdorf	Betula_alboides
Senckenberg Natural History Collections Dresden, Museum of Mineralogy and Geology, Paleobotanical collection	Sf._2224	Seifhennersdorf	Betula_alboides
Senckenberg Natural History Collections Dresden, Museum of Mineralogy and Geology, Paleobotanical collection	Sf._2229	Seifhennersdorf	Betula_alboides
Senckenberg Natural History Collections Dresden, Museum of Mineralogy and Geology, Paleobotanical collection	Sf._2237	Seifhennersdorf	Betula_alboides
Senckenberg Natural History Collections Dresden, Museum of Mineralogy and Geology, Paleobotanical collection	Sf._2366	Seifhennersdorf	Betula_alboides
Senckenberg Natural History Collections Dresden, Museum of Mineralogy and Geology, Paleobotanical collection	Sf._2421	Seifhennersdorf	Betula_alboides
Senckenberg Natural History Collections Dresden, Museum of Mineralogy and Geology, Paleobotanical collection	Sf._3066	Seifhennersdorf	Betula_alboides
Senckenberg Natural History Collections Dresden, Museum of Mineralogy and Geology, Paleobotanical collection	Sf._3293a	Seifhennersdorf	Betula_alboides
Senckenberg Natural History Collections Dresden, Museum of Mineralogy and Geology, Paleobotanical collection	Sf._3293b	Seifhennersdorf	Betula_alboides
Senckenberg Natural History Collections Dresden, Museum of Mineralogy and Geology, Paleobotanical collection	Sf._3315,1	Seifhennersdorf	Betula_alboides
Senckenberg Natural History Collections Dresden, Museum of Mineralogy and Geology, Paleobotanical collection	Sf._3316a	Seifhennersdorf	Betula_alboides
Senckenberg Natural History Collections Dresden, Museum of Mineralogy and Geology, Paleobotanical collection	Sf._3316b	Seifhennersdorf	Betula_alboides
Senckenberg Natural History Collections Dresden, Museum of Mineralogy and Geology, Paleobotanical collection	Sf._3433:1,2	Seifhennersdorf	Betula_alboides
Senckenberg Natural History Collections Dresden, Museum of Mineralogy and Geology, Paleobotanical collection	Sf._3458	Seifhennersdorf	Betula_alboides
Senckenberg Natural History Collections Dresden, Museum of Mineralogy and Geology, Paleobotanical collection	Sf._3730	Seifhennersdorf	Betula_alboides
Senckenberg Natural History Collections Dresden, Museum of Mineralogy and Geology, Paleobotanical collection	Sf._4095	Seifhennersdorf	Betula_alboides
Senckenberg Natural History Collections Dresden, Museum of Mineralogy and Geology, Paleobotanical collection	Sf._4205	Seifhennersdorf	Betula_alboides
Senckenberg Natural History Collections Dresden, Museum of Mineralogy and Geology, Paleobotanical collection	Sf._4253:1,2	Seifhennersdorf	Betula_alboides
Senckenberg Natural History Collections Dresden, Museum of Mineralogy and Geology, Paleobotanical collection	Sf._4255a	Seifhennersdorf	Betula_alboides
Senckenberg Natural History Collections Dresden, Museum of Mineralogy and Geology, Paleobotanical collection	Sf._4304b	Seifhennersdorf	Betula_alboides
Senckenberg Natural History Collections Dresden, Museum of Mineralogy and Geology, Paleobotanical collection	Sf._4360	Seifhennersdorf	Betula_alboides
Senckenberg Natural History Collections Dresden, Museum of Mineralogy and Geology, Paleobotanical collection	Sf._4361	Seifhennersdorf	Betula_alboides
Senckenberg Natural History Collections Dresden, Museum of Mineralogy and Geology, Paleobotanical collection	Sf._4681	Seifhennersdorf	Betula_alboides
Senckenberg Natural History Collections Dresden, Museum of Mineralogy and Geology, Paleobotanical collection	Sf._4689	Seifhennersdorf	Betula_alboides
Senckenberg Natural History Collections Dresden, Museum of Mineralogy and Geology, Paleobotanical collection	Sf._4692	Seifhennersdorf	Betula_alboides
Senckenberg Natural History Collections Dresden, Museum of Mineralogy and Geology, Paleobotanical collection	Sf._4701:1,2	Seifhennersdorf	Betula_alboides
Senckenberg Natural History Collections Dresden, Museum of Mineralogy and Geology, Paleobotanical collection	Sf._4705	Seifhennersdorf	Betula_alboides
Senckenberg Natural History Collections Dresden, Museum of Mineralogy and Geology, Paleobotanical collection	Sf._4717	Seifhennersdorf	Betula_alboides
Senckenberg Natural History Collections Dresden, Museum of Mineralogy and Geology, Paleobotanical collection	Sf._4718a	Seifhennersdorf	Betula_alboides
Senckenberg Natural History Collections Dresden, Museum of Mineralogy and Geology, Paleobotanical collection	Sf._4719	Seifhennersdorf	Betula_alboides
Senckenberg Natural History Collections Dresden, Museum of Mineralogy and Geology, Paleobotanical collection	Sf._4722	Seifhennersdorf	Betula_alboides
Senckenberg Natural History Collections Dresden, Museum of Mineralogy and Geology, Paleobotanical collection	Sf._4724	Seifhennersdorf	Betula_alboides
Senckenberg Natural History Collections Dresden, Museum of Mineralogy and Geology, Paleobotanical collection	Sf._4725	Seifhennersdorf	Betula_alboides
Senckenberg Natural History Collections Dresden, Museum of Mineralogy and Geology, Paleobotanical collection	Sf._4726	Seifhennersdorf	Betula_alboides
Senckenberg Natural History Collections Dresden, Museum of Mineralogy and Geology, Paleobotanical collection	Sf._4727:1,2	Seifhennersdorf	Betula_alboides
Senckenberg Natural History Collections Dresden, Museum of Mineralogy and Geology, Paleobotanical collection	Sf._4734	Seifhennersdorf	Betula_alboides
Senckenberg Natural History Collections Dresden, Museum of Mineralogy and Geology, Paleobotanical collection	Sf._4736:1,2	Seifhennersdorf	Betula_alboides
Senckenberg Natural History Collections Dresden, Museum of Mineralogy and Geology, Paleobotanical collection	Sf._4877a	Seifhennersdorf	Betula_alboides
Senckenberg Natural History Collections Dresden, Museum of Mineralogy and Geology, Paleobotanical collection	Sf._4877b	Seifhennersdorf	Betula_alboides
Senckenberg Natural History Collections Dresden, Museum of Mineralogy and Geology, Paleobotanical collection	Sf._4931 (II)	Seifhennersdorf	Betula_alboides
Senckenberg Natural History Collections Dresden, Museum of Mineralogy and Geology, Paleobotanical collection	Sf._4718a	Seifhennersdorf	Betula_alboides
Senckenberg Natural History Collections Dresden, Museum of Mineralogy and Geology, Paleobotanical collection	Sf._5238	Seifhennersdorf	Betula_alboides
Senckenberg Natural History Collections Dresden, Museum of Mineralogy and Geology, Paleobotanical collection	Sf._7554	Seifhennersdorf	Betula_alboides
Senckenberg Natural History Collections Dresden, Museum of Mineralogy and Geology, Paleobotanical collection	Sf._7889	Seifhennersdorf	Betula_alboides
Senckenberg Natural History Collections Dresden, Museum of Mineralogy and Geology, Paleobotanical collection	Sf._8263	Seifhennersdorf	Betula_alboides
Senckenberg Natural History Collections Dresden, Museum of Mineralogy and Geology, Paleobotanical collection	Sf._8264a	Seifhennersdorf	Betula_alboides
Senckenberg Natural History Collections Dresden, Museum of Mineralogy and Geology, Paleobotanical collection	Sf._8270:1b	Seifhennersdorf	Betula_alboides
Senckenberg Natural History Collections Dresden, Museum of Mineralogy and Geology, Paleobotanical collection	Sf._8312	Seifhennersdorf	Betula_alboides
Senckenberg Natural History Collections Dresden, Museum of Mineralogy and Geology, Paleobotanical collection	Sf._8654	Seifhennersdorf	Betula_alboides
Senckenberg Natural History Collections Dresden, Museum of Mineralogy and Geology, Paleobotanical collection	Sf._8680	Seifhennersdorf	Betula_alboides
Senckenberg Natural History Collections Dresden, Museum of Mineralogy and Geology, Paleobotanical collection	Sf._35 (II)	Seifhennersdorf	Carpinus_grandis
Senckenberg Natural History Collections Dresden, Museum of Mineralogy and Geology, Paleobotanical collection	Sf._365:1,2	Seifhennersdorf	Carpinus_grandis
Senckenberg Natural History Collections Dresden, Museum of Mineralogy and Geology, Paleobotanical collection	Sf._1196	Seifhennersdorf	Carpinus_grandis
Senckenberg Natural History Collections Dresden, Museum of Mineralogy and Geology, Paleobotanical collection	Sf._1265	Seifhennersdorf	Carpinus_grandis
Senckenberg Natural History Collections Dresden, Museum of Mineralogy and Geology, Paleobotanical collection	Sf._1284a	Seifhennersdorf	Carpinus_grandis
Senckenberg Natural History Collections Dresden, Museum of Mineralogy and Geology, Paleobotanical collection	Sf._1301	Seifhennersdorf	Carpinus_grandis
Senckenberg Natural History Collections Dresden, Museum of Mineralogy and Geology, Paleobotanical collection	Sf._1305:1,2	Seifhennersdorf	Carpinus_grandis
Senckenberg Natural History Collections Dresden, Museum of Mineralogy and Geology, Paleobotanical collection	Sf._1349a	Seifhennersdorf	Carpinus_grandis
Senckenberg Natural History Collections Dresden, Museum of Mineralogy and Geology, Paleobotanical collection	Sf._1361	Seifhennersdorf	Carpinus_grandis
Senckenberg Natural History Collections Dresden, Museum of Mineralogy and Geology, Paleobotanical collection	Sf._1362	Seifhennersdorf	Carpinus_grandis
Senckenberg Natural History Collections Dresden, Museum of Mineralogy and Geology, Paleobotanical collection	Sf._1366:1,2	Seifhennersdorf	Carpinus_grandis
Senckenberg Natural History Collections Dresden, Museum of Mineralogy and Geology, Paleobotanical collection	Sf._1369	Seifhennersdorf	Carpinus_grandis
Senckenberg Natural History Collections Dresden, Museum of Mineralogy and Geology, Paleobotanical collection	Sf._1370	Seifhennersdorf	Carpinus_grandis
Senckenberg Natural History Collections Dresden, Museum of Mineralogy and Geology, Paleobotanical collection	Sf._1376	Seifhennersdorf	Carpinus_grandis
Senckenberg Natural History Collections Dresden, Museum of Mineralogy and Geology, Paleobotanical collection	Sf._1380:1,2	Seifhennersdorf	Carpinus_grandis
Senckenberg Natural History Collections Dresden, Museum of Mineralogy and Geology, Paleobotanical collection	Sf._1382	Seifhennersdorf	Carpinus_grandis
Senckenberg Natural History Collections Dresden, Museum of Mineralogy and Geology, Paleobotanical collection	Sf._1383	Seifhennersdorf	Carpinus_grandis
Senckenberg Natural History Collections Dresden, Museum of Mineralogy and Geology, Paleobotanical collection	Sf._1384	Seifhennersdorf	Carpinus_grandis
Senckenberg Natural History Collections Dresden, Museum of Mineralogy and Geology, Paleobotanical collection	Sf._1385	Seifhennersdorf	Carpinus_grandis
Senckenberg Natural History Collections Dresden, Museum of Mineralogy and Geology, Paleobotanical collection	Sf._1445	Seifhennersdorf	Carpinus_grandis
Senckenberg Natural History Collections Dresden, Museum of Mineralogy and Geology, Paleobotanical collection	Sf._1455	Seifhennersdorf	Carpinus_grandis
Senckenberg Natural History Collections Dresden, Museum of Mineralogy and Geology, Paleobotanical collection	Sf._1495	Seifhennersdorf	Carpinus_grandis
Senckenberg Natural History Collections Dresden, Museum of Mineralogy and Geology, Paleobotanical collection	Sf._1497	Seifhennersdorf	Carpinus_grandis
Senckenberg Natural History Collections Dresden, Museum of Mineralogy and Geology, Paleobotanical collection	Sf._1499	Seifhennersdorf	Carpinus_grandis
Senckenberg Natural History Collections Dresden, Museum of Mineralogy and Geology, Paleobotanical collection	Sf._1537	Seifhennersdorf	Carpinus_grandis
Senckenberg Natural History Collections Dresden, Museum of Mineralogy and Geology, Paleobotanical collection	Sf._1539	Seifhennersdorf	Carpinus_grandis
Senckenberg Natural History Collections Dresden, Museum of Mineralogy and Geology, Paleobotanical collection	Sf._1541	Seifhennersdorf	Carpinus_grandis
Senckenberg Natural History Collections Dresden, Museum of Mineralogy and Geology, Paleobotanical collection	Sf._1544	Seifhennersdorf	Carpinus_grandis
Senckenberg Natural History Collections Dresden, Museum of Mineralogy and Geology, Paleobotanical collection	Sf._1545	Seifhennersdorf	Carpinus_grandis
Senckenberg Natural History Collections Dresden, Museum of Mineralogy and Geology, Paleobotanical collection	Sf._1547	Seifhennersdorf	Carpinus_grandis
Senckenberg Natural History Collections Dresden, Museum of Mineralogy and Geology, Paleobotanical collection	Sf._1549	Seifhennersdorf	Carpinus_grandis
Senckenberg Natural History Collections Dresden, Museum of Mineralogy and Geology, Paleobotanical collection	Sf._1550	Seifhennersdorf	Carpinus_grandis
Senckenberg Natural History Collections Dresden, Museum of Mineralogy and Geology, Paleobotanical collection	Sf._1553	Seifhennersdorf	Carpinus_grandis
Senckenberg Natural History Collections Dresden, Museum of Mineralogy and Geology, Paleobotanical collection	Sf._1555	Seifhennersdorf	Carpinus_grandis
Senckenberg Natural History Collections Dresden, Museum of Mineralogy and Geology, Paleobotanical collection	Sf._1556	Seifhennersdorf	Carpinus_grandis
Senckenberg Natural History Collections Dresden, Museum of Mineralogy and Geology, Paleobotanical collection	Sf._1557	Seifhennersdorf	Carpinus_grandis
Senckenberg Natural History Collections Dresden, Museum of Mineralogy and Geology, Paleobotanical collection	Sf._1558	Seifhennersdorf	Carpinus_grandis
Senckenberg Natural History Collections Dresden, Museum of Mineralogy and Geology, Paleobotanical collection	Sf._1559	Seifhennersdorf	Carpinus_grandis
Senckenberg Natural History Collections Dresden, Museum of Mineralogy and Geology, Paleobotanical collection	Sf._1560	Seifhennersdorf	Carpinus_grandis
Senckenberg Natural History Collections Dresden, Museum of Mineralogy and Geology, Paleobotanical collection	Sf._1562	Seifhennersdorf	Carpinus_grandis
Senckenberg Natural History Collections Dresden, Museum of Mineralogy and Geology, Paleobotanical collection	Sf._1564	Seifhennersdorf	Carpinus_grandis
Senckenberg Natural History Collections Dresden, Museum of Mineralogy and Geology, Paleobotanical collection	Sf._1565	Seifhennersdorf	Carpinus_grandis
Senckenberg Natural History Collections Dresden, Museum of Mineralogy and Geology, Paleobotanical collection	Sf._1566	Seifhennersdorf	Carpinus_grandis
Senckenberg Natural History Collections Dresden, Museum of Mineralogy and Geology, Paleobotanical collection	Sf._1567	Seifhennersdorf	Carpinus_grandis
Senckenberg Natural History Collections Dresden, Museum of Mineralogy and Geology, Paleobotanical collection	Sf._1568	Seifhennersdorf	Carpinus_grandis
Senckenberg Natural History Collections Dresden, Museum of Mineralogy and Geology, Paleobotanical collection	Sf._1569	Seifhennersdorf	Carpinus_grandis
Senckenberg Natural History Collections Dresden, Museum of Mineralogy and Geology, Paleobotanical collection	Sf._1570	Seifhennersdorf	Carpinus_grandis
Senckenberg Natural History Collections Dresden, Museum of Mineralogy and Geology, Paleobotanical collection	Sf._1571	Seifhennersdorf	Carpinus_grandis
Senckenberg Natural History Collections Dresden, Museum of Mineralogy and Geology, Paleobotanical collection	Sf._1572:1,2	Seifhennersdorf	Carpinus_grandis
Senckenberg Natural History Collections Dresden, Museum of Mineralogy and Geology, Paleobotanical collection	Sf._1573a	Seifhennersdorf	Carpinus_grandis
Senckenberg Natural History Collections Dresden, Museum of Mineralogy and Geology, Paleobotanical collection	Sf._1573b	Seifhennersdorf	Carpinus_grandis
Senckenberg Natural History Collections Dresden, Museum of Mineralogy and Geology, Paleobotanical collection	Sf._1575	Seifhennersdorf	Carpinus_grandis
Senckenberg Natural History Collections Dresden, Museum of Mineralogy and Geology, Paleobotanical collection	Sf._1576	Seifhennersdorf	Carpinus_grandis
Senckenberg Natural History Collections Dresden, Museum of Mineralogy and Geology, Paleobotanical collection	Sf._1577	Seifhennersdorf	Carpinus_grandis
Senckenberg Natural History Collections Dresden, Museum of Mineralogy and Geology, Paleobotanical collection	Sf._1578	Seifhennersdorf	Carpinus_grandis
Senckenberg Natural History Collections Dresden, Museum of Mineralogy and Geology, Paleobotanical collection	Sf._1579	Seifhennersdorf	Carpinus_grandis
Senckenberg Natural History Collections Dresden, Museum of Mineralogy and Geology, Paleobotanical collection	Sf._1580	Seifhennersdorf	Carpinus_grandis
Senckenberg Natural History Collections Dresden, Museum of Mineralogy and Geology, Paleobotanical collection	Sf._1581a	Seifhennersdorf	Carpinus_grandis
Senckenberg Natural History Collections Dresden, Museum of Mineralogy and Geology, Paleobotanical collection	Sf._1581b	Seifhennersdorf	Carpinus_grandis
Senckenberg Natural History Collections Dresden, Museum of Mineralogy and Geology, Paleobotanical collection	Sf._1582:1,2 (I)	Seifhennersdorf	Carpinus_grandis
Senckenberg Natural History Collections Dresden, Museum of Mineralogy and Geology, Paleobotanical collection	Sf._1583	Seifhennersdorf	Carpinus_grandis
Senckenberg Natural History Collections Dresden, Museum of Mineralogy and Geology, Paleobotanical collection	Sf._1584	Seifhennersdorf	Carpinus_grandis
Senckenberg Natural History Collections Dresden, Museum of Mineralogy and Geology, Paleobotanical collection	Sf._1586 (I)	Seifhennersdorf	Carpinus_grandis
Senckenberg Natural History Collections Dresden, Museum of Mineralogy and Geology, Paleobotanical collection	Sf._1587	Seifhennersdorf	Carpinus_grandis
Senckenberg Natural History Collections Dresden, Museum of Mineralogy and Geology, Paleobotanical collection	Sf._1588	Seifhennersdorf	Carpinus_grandis
Senckenberg Natural History Collections Dresden, Museum of Mineralogy and Geology, Paleobotanical collection	Sf._1589	Seifhennersdorf	Carpinus_grandis
Senckenberg Natural History Collections Dresden, Museum of Mineralogy and Geology, Paleobotanical collection	Sf._1590	Seifhennersdorf	Carpinus_grandis
Senckenberg Natural History Collections Dresden, Museum of Mineralogy and Geology, Paleobotanical collection	Sf._1591	Seifhennersdorf	Carpinus_grandis
Senckenberg Natural History Collections Dresden, Museum of Mineralogy and Geology, Paleobotanical collection	Sf._1592	Seifhennersdorf	Carpinus_grandis
Senckenberg Natural History Collections Dresden, Museum of Mineralogy and Geology, Paleobotanical collection	Sf._1594	Seifhennersdorf	Carpinus_grandis
Senckenberg Natural History Collections Dresden, Museum of Mineralogy and Geology, Paleobotanical collection	Sf._1595	Seifhennersdorf	Carpinus_grandis
Senckenberg Natural History Collections Dresden, Museum of Mineralogy and Geology, Paleobotanical collection	Sf._1596	Seifhennersdorf	Carpinus_grandis
Senckenberg Natural History Collections Dresden, Museum of Mineralogy and Geology, Paleobotanical collection	Sf._1598	Seifhennersdorf	Carpinus_grandis
Senckenberg Natural History Collections Dresden, Museum of Mineralogy and Geology, Paleobotanical collection	Sf._1599	Seifhennersdorf	Carpinus_grandis
Senckenberg Natural History Collections Dresden, Museum of Mineralogy and Geology, Paleobotanical collection	Sf._1600	Seifhennersdorf	Carpinus_grandis
Senckenberg Natural History Collections Dresden, Museum of Mineralogy and Geology, Paleobotanical collection	Sf._1601	Seifhennersdorf	Carpinus_grandis
Senckenberg Natural History Collections Dresden, Museum of Mineralogy and Geology, Paleobotanical collection	Sf._1603:1,2	Seifhennersdorf	Carpinus_grandis
Senckenberg Natural History Collections Dresden, Museum of Mineralogy and Geology, Paleobotanical collection	Sf._1604	Seifhennersdorf	Carpinus_grandis
Senckenberg Natural History Collections Dresden, Museum of Mineralogy and Geology, Paleobotanical collection	Sf._1605	Seifhennersdorf	Carpinus_grandis
Senckenberg Natural History Collections Dresden, Museum of Mineralogy and Geology, Paleobotanical collection	Sf._1606	Seifhennersdorf	Carpinus_grandis
Senckenberg Natural History Collections Dresden, Museum of Mineralogy and Geology, Paleobotanical collection	Sf._1607	Seifhennersdorf	Carpinus_grandis
Senckenberg Natural History Collections Dresden, Museum of Mineralogy and Geology, Paleobotanical collection	Sf._1608	Seifhennersdorf	Carpinus_grandis
Senckenberg Natural History Collections Dresden, Museum of Mineralogy and Geology, Paleobotanical collection	Sf._1609 (I)	Seifhennersdorf	Carpinus_grandis
Senckenberg Natural History Collections Dresden, Museum of Mineralogy and Geology, Paleobotanical collection	Sf._1610	Seifhennersdorf	Carpinus_grandis
Senckenberg Natural History Collections Dresden, Museum of Mineralogy and Geology, Paleobotanical collection	Sf._1611	Seifhennersdorf	Carpinus_grandis
Senckenberg Natural History Collections Dresden, Museum of Mineralogy and Geology, Paleobotanical collection	Sf._1612	Seifhennersdorf	Carpinus_grandis
Senckenberg Natural History Collections Dresden, Museum of Mineralogy and Geology, Paleobotanical collection	Sf._1613 (I)	Seifhennersdorf	Carpinus_grandis
Senckenberg Natural History Collections Dresden, Museum of Mineralogy and Geology, Paleobotanical collection	Sf._1616 (I)	Seifhennersdorf	Carpinus_grandis
Senckenberg Natural History Collections Dresden, Museum of Mineralogy and Geology, Paleobotanical collection	Sf._1617	Seifhennersdorf	Carpinus_grandis
Senckenberg Natural History Collections Dresden, Museum of Mineralogy and Geology, Paleobotanical collection	Sf._1618	Seifhennersdorf	Carpinus_grandis
Senckenberg Natural History Collections Dresden, Museum of Mineralogy and Geology, Paleobotanical collection	Sf._1619 (I)	Seifhennersdorf	Carpinus_grandis
Senckenberg Natural History Collections Dresden, Museum of Mineralogy and Geology, Paleobotanical collection	Sf._1620	Seifhennersdorf	Carpinus_grandis
Senckenberg Natural History Collections Dresden, Museum of Mineralogy and Geology, Paleobotanical collection	Sf._1621	Seifhennersdorf	Carpinus_grandis
Senckenberg Natural History Collections Dresden, Museum of Mineralogy and Geology, Paleobotanical collection	Sf._1622	Seifhennersdorf	Carpinus_grandis
Senckenberg Natural History Collections Dresden, Museum of Mineralogy and Geology, Paleobotanical collection	Sf._1623	Seifhennersdorf	Carpinus_grandis
Senckenberg Natural History Collections Dresden, Museum of Mineralogy and Geology, Paleobotanical collection	Sf._1624	Seifhennersdorf	Carpinus_grandis
Senckenberg Natural History Collections Dresden, Museum of Mineralogy and Geology, Paleobotanical collection	Sf._1625	Seifhennersdorf	Carpinus_grandis
Senckenberg Natural History Collections Dresden, Museum of Mineralogy and Geology, Paleobotanical collection	Sf._1626	Seifhennersdorf	Carpinus_grandis
Senckenberg Natural History Collections Dresden, Museum of Mineralogy and Geology, Paleobotanical collection	Sf._1627	Seifhennersdorf	Carpinus_grandis
Senckenberg Natural History Collections Dresden, Museum of Mineralogy and Geology, Paleobotanical collection	Sf._1628	Seifhennersdorf	Carpinus_grandis
Senckenberg Natural History Collections Dresden, Museum of Mineralogy and Geology, Paleobotanical collection	Sf._1629	Seifhennersdorf	Carpinus_grandis
Senckenberg Natural History Collections Dresden, Museum of Mineralogy and Geology, Paleobotanical collection	Sf._1630	Seifhennersdorf	Carpinus_grandis
Senckenberg Natural History Collections Dresden, Museum of Mineralogy and Geology, Paleobotanical collection	Sf._1631	Seifhennersdorf	Carpinus_grandis
Senckenberg Natural History Collections Dresden, Museum of Mineralogy and Geology, Paleobotanical collection	Sf._1632	Seifhennersdorf	Carpinus_grandis
Senckenberg Natural History Collections Dresden, Museum of Mineralogy and Geology, Paleobotanical collection	Sf._1633	Seifhennersdorf	Carpinus_grandis
Senckenberg Natural History Collections Dresden, Museum of Mineralogy and Geology, Paleobotanical collection	Sf._1634	Seifhennersdorf	Carpinus_grandis
Senckenberg Natural History Collections Dresden, Museum of Mineralogy and Geology, Paleobotanical collection	Sf._1635	Seifhennersdorf	Carpinus_grandis
Senckenberg Natural History Collections Dresden, Museum of Mineralogy and Geology, Paleobotanical collection	Sf._1636	Seifhennersdorf	Carpinus_grandis
Senckenberg Natural History Collections Dresden, Museum of Mineralogy and Geology, Paleobotanical collection	Sf._1637	Seifhennersdorf	Carpinus_grandis
Senckenberg Natural History Collections Dresden, Museum of Mineralogy and Geology, Paleobotanical collection	Sf._1638	Seifhennersdorf	Carpinus_grandis
Senckenberg Natural History Collections Dresden, Museum of Mineralogy and Geology, Paleobotanical collection	Sf._1639	Seifhennersdorf	Carpinus_grandis
Senckenberg Natural History Collections Dresden, Museum of Mineralogy and Geology, Paleobotanical collection	Sf._1641:1,2	Seifhennersdorf	Carpinus_grandis
Senckenberg Natural History Collections Dresden, Museum of Mineralogy and Geology, Paleobotanical collection	Sf._1642:1,2	Seifhennersdorf	Carpinus_grandis
Senckenberg Natural History Collections Dresden, Museum of Mineralogy and Geology, Paleobotanical collection	Sf._1643 (I)	Seifhennersdorf	Carpinus_grandis
Senckenberg Natural History Collections Dresden, Museum of Mineralogy and Geology, Paleobotanical collection	Sf._1644	Seifhennersdorf	Carpinus_grandis
Senckenberg Natural History Collections Dresden, Museum of Mineralogy and Geology, Paleobotanical collection	Sf._1645	Seifhennersdorf	Carpinus_grandis
Senckenberg Natural History Collections Dresden, Museum of Mineralogy and Geology, Paleobotanical collection	Sf._1646	Seifhennersdorf	Carpinus_grandis
Senckenberg Natural History Collections Dresden, Museum of Mineralogy and Geology, Paleobotanical collection	Sf._1649	Seifhennersdorf	Carpinus_grandis
Senckenberg Natural History Collections Dresden, Museum of Mineralogy and Geology, Paleobotanical collection	Sf._1650	Seifhennersdorf	Carpinus_grandis
Senckenberg Natural History Collections Dresden, Museum of Mineralogy and Geology, Paleobotanical collection	Sf._1651	Seifhennersdorf	Carpinus_grandis
Senckenberg Natural History Collections Dresden, Museum of Mineralogy and Geology, Paleobotanical collection	Sf._1652 (I)	Seifhennersdorf	Carpinus_grandis
Senckenberg Natural History Collections Dresden, Museum of Mineralogy and Geology, Paleobotanical collection	Sf._1653	Seifhennersdorf	Carpinus_grandis
Senckenberg Natural History Collections Dresden, Museum of Mineralogy and Geology, Paleobotanical collection	Sf._1654	Seifhennersdorf	Carpinus_grandis
Senckenberg Natural History Collections Dresden, Museum of Mineralogy and Geology, Paleobotanical collection	Sf._1655 (I)	Seifhennersdorf	Carpinus_grandis
Senckenberg Natural History Collections Dresden, Museum of Mineralogy and Geology, Paleobotanical collection	Sf._1656	Seifhennersdorf	Carpinus_grandis
Senckenberg Natural History Collections Dresden, Museum of Mineralogy and Geology, Paleobotanical collection	Sf._1657	Seifhennersdorf	Carpinus_grandis
Senckenberg Natural History Collections Dresden, Museum of Mineralogy and Geology, Paleobotanical collection	Sf._1658	Seifhennersdorf	Carpinus_grandis
Senckenberg Natural History Collections Dresden, Museum of Mineralogy and Geology, Paleobotanical collection	Sf._1659	Seifhennersdorf	Carpinus_grandis
Senckenberg Natural History Collections Dresden, Museum of Mineralogy and Geology, Paleobotanical collection	Sf._1660	Seifhennersdorf	Carpinus_grandis
Senckenberg Natural History Collections Dresden, Museum of Mineralogy and Geology, Paleobotanical collection	Sf._1661	Seifhennersdorf	Carpinus_grandis
Senckenberg Natural History Collections Dresden, Museum of Mineralogy and Geology, Paleobotanical collection	Sf._1662	Seifhennersdorf	Carpinus_grandis
Senckenberg Natural History Collections Dresden, Museum of Mineralogy and Geology, Paleobotanical collection	Sf._1664	Seifhennersdorf	Carpinus_grandis
Senckenberg Natural History Collections Dresden, Museum of Mineralogy and Geology, Paleobotanical collection	Sf._1665	Seifhennersdorf	Carpinus_grandis
Senckenberg Natural History Collections Dresden, Museum of Mineralogy and Geology, Paleobotanical collection	Sf._1666	Seifhennersdorf	Carpinus_grandis
Senckenberg Natural History Collections Dresden, Museum of Mineralogy and Geology, Paleobotanical collection	Sf._1667:1,2	Seifhennersdorf	Carpinus_grandis
Senckenberg Natural History Collections Dresden, Museum of Mineralogy and Geology, Paleobotanical collection	Sf._1668	Seifhennersdorf	Carpinus_grandis
Senckenberg Natural History Collections Dresden, Museum of Mineralogy and Geology, Paleobotanical collection	Sf._1669	Seifhennersdorf	Carpinus_grandis
Senckenberg Natural History Collections Dresden, Museum of Mineralogy and Geology, Paleobotanical collection	Sf._1670 (I)	Seifhennersdorf	Carpinus_grandis
Senckenberg Natural History Collections Dresden, Museum of Mineralogy and Geology, Paleobotanical collection	Sf._1670 (II)	Seifhennersdorf	Carpinus_grandis
Senckenberg Natural History Collections Dresden, Museum of Mineralogy and Geology, Paleobotanical collection	Sf._1671	Seifhennersdorf	Carpinus_grandis
Senckenberg Natural History Collections Dresden, Museum of Mineralogy and Geology, Paleobotanical collection	Sf._1672	Seifhennersdorf	Carpinus_grandis
Senckenberg Natural History Collections Dresden, Museum of Mineralogy and Geology, Paleobotanical collection	Sf._1673	Seifhennersdorf	Carpinus_grandis
Senckenberg Natural History Collections Dresden, Museum of Mineralogy and Geology, Paleobotanical collection	Sf._1676	Seifhennersdorf	Carpinus_grandis
Senckenberg Natural History Collections Dresden, Museum of Mineralogy and Geology, Paleobotanical collection	Sf._1677	Seifhennersdorf	Carpinus_grandis
Senckenberg Natural History Collections Dresden, Museum of Mineralogy and Geology, Paleobotanical collection	Sf._1679	Seifhennersdorf	Carpinus_grandis
Senckenberg Natural History Collections Dresden, Museum of Mineralogy and Geology, Paleobotanical collection	Sf._1680 (II)	Seifhennersdorf	Carpinus_grandis
Senckenberg Natural History Collections Dresden, Museum of Mineralogy and Geology, Paleobotanical collection	Sf._1681	Seifhennersdorf	Carpinus_grandis
Senckenberg Natural History Collections Dresden, Museum of Mineralogy and Geology, Paleobotanical collection	Sf._1682 (I)	Seifhennersdorf	Carpinus_grandis
Senckenberg Natural History Collections Dresden, Museum of Mineralogy and Geology, Paleobotanical collection	Sf._1683	Seifhennersdorf	Carpinus_grandis
Senckenberg Natural History Collections Dresden, Museum of Mineralogy and Geology, Paleobotanical collection	Sf._1684	Seifhennersdorf	Carpinus_grandis
Senckenberg Natural History Collections Dresden, Museum of Mineralogy and Geology, Paleobotanical collection	Sf._1686	Seifhennersdorf	Carpinus_grandis
Senckenberg Natural History Collections Dresden, Museum of Mineralogy and Geology, Paleobotanical collection	Sf._1687	Seifhennersdorf	Carpinus_grandis
Senckenberg Natural History Collections Dresden, Museum of Mineralogy and Geology, Paleobotanical collection	Sf._1688	Seifhennersdorf	Carpinus_grandis
Senckenberg Natural History Collections Dresden, Museum of Mineralogy and Geology, Paleobotanical collection	Sf._1689	Seifhennersdorf	Carpinus_grandis
Senckenberg Natural History Collections Dresden, Museum of Mineralogy and Geology, Paleobotanical collection	Sf._1690	Seifhennersdorf	Carpinus_grandis
Senckenberg Natural History Collections Dresden, Museum of Mineralogy and Geology, Paleobotanical collection	Sf._1691:1,2	Seifhennersdorf	Carpinus_grandis
Senckenberg Natural History Collections Dresden, Museum of Mineralogy and Geology, Paleobotanical collection	Sf._1692	Seifhennersdorf	Carpinus_grandis
Senckenberg Natural History Collections Dresden, Museum of Mineralogy and Geology, Paleobotanical collection	Sf._1693:1,2	Seifhennersdorf	Carpinus_grandis
Senckenberg Natural History Collections Dresden, Museum of Mineralogy and Geology, Paleobotanical collection	Sf._1694	Seifhennersdorf	Carpinus_grandis
Senckenberg Natural History Collections Dresden, Museum of Mineralogy and Geology, Paleobotanical collection	Sf._1695	Seifhennersdorf	Carpinus_grandis
Senckenberg Natural History Collections Dresden, Museum of Mineralogy and Geology, Paleobotanical collection	Sf._1696	Seifhennersdorf	Carpinus_grandis
Senckenberg Natural History Collections Dresden, Museum of Mineralogy and Geology, Paleobotanical collection	Sf._1697	Seifhennersdorf	Carpinus_grandis
Senckenberg Natural History Collections Dresden, Museum of Mineralogy and Geology, Paleobotanical collection	Sf._1698 (I)	Seifhennersdorf	Carpinus_grandis
Senckenberg Natural History Collections Dresden, Museum of Mineralogy and Geology, Paleobotanical collection	Sf._1699	Seifhennersdorf	Carpinus_grandis
Senckenberg Natural History Collections Dresden, Museum of Mineralogy and Geology, Paleobotanical collection	Sf._1700	Seifhennersdorf	Carpinus_grandis
Senckenberg Natural History Collections Dresden, Museum of Mineralogy and Geology, Paleobotanical collection	Sf._1701	Seifhennersdorf	Carpinus_grandis
Senckenberg Natural History Collections Dresden, Museum of Mineralogy and Geology, Paleobotanical collection	Sf._1702	Seifhennersdorf	Carpinus_grandis
Senckenberg Natural History Collections Dresden, Museum of Mineralogy and Geology, Paleobotanical collection	Sf._1704	Seifhennersdorf	Carpinus_grandis
Senckenberg Natural History Collections Dresden, Museum of Mineralogy and Geology, Paleobotanical collection	Sf._1707	Seifhennersdorf	Carpinus_grandis
Senckenberg Natural History Collections Dresden, Museum of Mineralogy and Geology, Paleobotanical collection	Sf._1711:1,2	Seifhennersdorf	Carpinus_grandis
Senckenberg Natural History Collections Dresden, Museum of Mineralogy and Geology, Paleobotanical collection	Sf._1715	Seifhennersdorf	Carpinus_grandis
Senckenberg Natural History Collections Dresden, Museum of Mineralogy and Geology, Paleobotanical collection	Sf._1716:1,2	Seifhennersdorf	Carpinus_grandis
Senckenberg Natural History Collections Dresden, Museum of Mineralogy and Geology, Paleobotanical collection	Sf._1717	Seifhennersdorf	Carpinus_grandis
Senckenberg Natural History Collections Dresden, Museum of Mineralogy and Geology, Paleobotanical collection	Sf._1718	Seifhennersdorf	Carpinus_grandis
Senckenberg Natural History Collections Dresden, Museum of Mineralogy and Geology, Paleobotanical collection	Sf._1719	Seifhennersdorf	Carpinus_grandis
Senckenberg Natural History Collections Dresden, Museum of Mineralogy and Geology, Paleobotanical collection	Sf._1720	Seifhennersdorf	Carpinus_grandis
Senckenberg Natural History Collections Dresden, Museum of Mineralogy and Geology, Paleobotanical collection	Sf._1722:1,2	Seifhennersdorf	Carpinus_grandis
Senckenberg Natural History Collections Dresden, Museum of Mineralogy and Geology, Paleobotanical collection	Sf._1723:1,2	Seifhennersdorf	Carpinus_grandis
Senckenberg Natural History Collections Dresden, Museum of Mineralogy and Geology, Paleobotanical collection	Sf._1724	Seifhennersdorf	Carpinus_grandis
Senckenberg Natural History Collections Dresden, Museum of Mineralogy and Geology, Paleobotanical collection	Sf._1725	Seifhennersdorf	Carpinus_grandis
Senckenberg Natural History Collections Dresden, Museum of Mineralogy and Geology, Paleobotanical collection	Sf._1726	Seifhennersdorf	Carpinus_grandis
Senckenberg Natural History Collections Dresden, Museum of Mineralogy and Geology, Paleobotanical collection	Sf._1727:1,2	Seifhennersdorf	Carpinus_grandis
Senckenberg Natural History Collections Dresden, Museum of Mineralogy and Geology, Paleobotanical collection	Sf._1728	Seifhennersdorf	Carpinus_grandis
Senckenberg Natural History Collections Dresden, Museum of Mineralogy and Geology, Paleobotanical collection	Sf._1729	Seifhennersdorf	Carpinus_grandis
Senckenberg Natural History Collections Dresden, Museum of Mineralogy and Geology, Paleobotanical collection	Sf._1730	Seifhennersdorf	Carpinus_grandis
Senckenberg Natural History Collections Dresden, Museum of Mineralogy and Geology, Paleobotanical collection	Sf._1731	Seifhennersdorf	Carpinus_grandis
Senckenberg Natural History Collections Dresden, Museum of Mineralogy and Geology, Paleobotanical collection	Sf._1732:1,2	Seifhennersdorf	Carpinus_grandis
Senckenberg Natural History Collections Dresden, Museum of Mineralogy and Geology, Paleobotanical collection	Sf._1734:1,2	Seifhennersdorf	Carpinus_grandis
Senckenberg Natural History Collections Dresden, Museum of Mineralogy and Geology, Paleobotanical collection	Sf._1735	Seifhennersdorf	Carpinus_grandis
Senckenberg Natural History Collections Dresden, Museum of Mineralogy and Geology, Paleobotanical collection	Sf._1736	Seifhennersdorf	Carpinus_grandis
Senckenberg Natural History Collections Dresden, Museum of Mineralogy and Geology, Paleobotanical collection	Sf._1737	Seifhennersdorf	Carpinus_grandis
Senckenberg Natural History Collections Dresden, Museum of Mineralogy and Geology, Paleobotanical collection	Sf._1738	Seifhennersdorf	Carpinus_grandis
Senckenberg Natural History Collections Dresden, Museum of Mineralogy and Geology, Paleobotanical collection	Sf._1739	Seifhennersdorf	Carpinus_grandis
Senckenberg Natural History Collections Dresden, Museum of Mineralogy and Geology, Paleobotanical collection	Sf._1740	Seifhennersdorf	Carpinus_grandis
Senckenberg Natural History Collections Dresden, Museum of Mineralogy and Geology, Paleobotanical collection	Sf._1741	Seifhennersdorf	Carpinus_grandis
Senckenberg Natural History Collections Dresden, Museum of Mineralogy and Geology, Paleobotanical collection	Sf._1742	Seifhennersdorf	Carpinus_grandis
Senckenberg Natural History Collections Dresden, Museum of Mineralogy and Geology, Paleobotanical collection	Sf._1743:1,2	Seifhennersdorf	Carpinus_grandis
Senckenberg Natural History Collections Dresden, Museum of Mineralogy and Geology, Paleobotanical collection	Sf._1745	Seifhennersdorf	Carpinus_grandis
Senckenberg Natural History Collections Dresden, Museum of Mineralogy and Geology, Paleobotanical collection	Sf._1747	Seifhennersdorf	Carpinus_grandis
Senckenberg Natural History Collections Dresden, Museum of Mineralogy and Geology, Paleobotanical collection	Sf._1748	Seifhennersdorf	Carpinus_grandis
Senckenberg Natural History Collections Dresden, Museum of Mineralogy and Geology, Paleobotanical collection	Sf._1749	Seifhennersdorf	Carpinus_grandis
Senckenberg Natural History Collections Dresden, Museum of Mineralogy and Geology, Paleobotanical collection	Sf._1753	Seifhennersdorf	Carpinus_grandis
Senckenberg Natural History Collections Dresden, Museum of Mineralogy and Geology, Paleobotanical collection	Sf._1754:1,2	Seifhennersdorf	Carpinus_grandis
Senckenberg Natural History Collections Dresden, Museum of Mineralogy and Geology, Paleobotanical collection	Sf._1755	Seifhennersdorf	Carpinus_grandis
Senckenberg Natural History Collections Dresden, Museum of Mineralogy and Geology, Paleobotanical collection	Sf._1756	Seifhennersdorf	Carpinus_grandis
Senckenberg Natural History Collections Dresden, Museum of Mineralogy and Geology, Paleobotanical collection	Sf._1757	Seifhennersdorf	Carpinus_grandis
Senckenberg Natural History Collections Dresden, Museum of Mineralogy and Geology, Paleobotanical collection	Sf._1759	Seifhennersdorf	Carpinus_grandis
Senckenberg Natural History Collections Dresden, Museum of Mineralogy and Geology, Paleobotanical collection	Sf._1760	Seifhennersdorf	Carpinus_grandis
Senckenberg Natural History Collections Dresden, Museum of Mineralogy and Geology, Paleobotanical collection	Sf._1761	Seifhennersdorf	Carpinus_grandis
Senckenberg Natural History Collections Dresden, Museum of Mineralogy and Geology, Paleobotanical collection	Sf._1762	Seifhennersdorf	Carpinus_grandis
Senckenberg Natural History Collections Dresden, Museum of Mineralogy and Geology, Paleobotanical collection	Sf._1765:1,2	Seifhennersdorf	Carpinus_grandis
Senckenberg Natural History Collections Dresden, Museum of Mineralogy and Geology, Paleobotanical collection	Sf._1766a	Seifhennersdorf	Carpinus_grandis
Senckenberg Natural History Collections Dresden, Museum of Mineralogy and Geology, Paleobotanical collection	Sf._1766b	Seifhennersdorf	Carpinus_grandis
Senckenberg Natural History Collections Dresden, Museum of Mineralogy and Geology, Paleobotanical collection	Sf._1768	Seifhennersdorf	Carpinus_grandis
Senckenberg Natural History Collections Dresden, Museum of Mineralogy and Geology, Paleobotanical collection	Sf._1769	Seifhennersdorf	Carpinus_grandis
Senckenberg Natural History Collections Dresden, Museum of Mineralogy and Geology, Paleobotanical collection	Sf._1770	Seifhennersdorf	Carpinus_grandis
Senckenberg Natural History Collections Dresden, Museum of Mineralogy and Geology, Paleobotanical collection	Sf._1771	Seifhennersdorf	Carpinus_grandis
Senckenberg Natural History Collections Dresden, Museum of Mineralogy and Geology, Paleobotanical collection	Sf._1772	Seifhennersdorf	Carpinus_grandis
Senckenberg Natural History Collections Dresden, Museum of Mineralogy and Geology, Paleobotanical collection	Sf._1773	Seifhennersdorf	Carpinus_grandis
Senckenberg Natural History Collections Dresden, Museum of Mineralogy and Geology, Paleobotanical collection	Sf._1774	Seifhennersdorf	Carpinus_grandis
Senckenberg Natural History Collections Dresden, Museum of Mineralogy and Geology, Paleobotanical collection	Sf._1775	Seifhennersdorf	Carpinus_grandis
Senckenberg Natural History Collections Dresden, Museum of Mineralogy and Geology, Paleobotanical collection	Sf._1778:1,2	Seifhennersdorf	Carpinus_grandis
Senckenberg Natural History Collections Dresden, Museum of Mineralogy and Geology, Paleobotanical collection	Sf._1779	Seifhennersdorf	Carpinus_grandis
Senckenberg Natural History Collections Dresden, Museum of Mineralogy and Geology, Paleobotanical collection	Sf._1780	Seifhennersdorf	Carpinus_grandis
Senckenberg Natural History Collections Dresden, Museum of Mineralogy and Geology, Paleobotanical collection	Sf._1781	Seifhennersdorf	Carpinus_grandis
Senckenberg Natural History Collections Dresden, Museum of Mineralogy and Geology, Paleobotanical collection	Sf._1784	Seifhennersdorf	Carpinus_grandis
Senckenberg Natural History Collections Dresden, Museum of Mineralogy and Geology, Paleobotanical collection	Sf._1785	Seifhennersdorf	Carpinus_grandis
Senckenberg Natural History Collections Dresden, Museum of Mineralogy and Geology, Paleobotanical collection	Sf._1786	Seifhennersdorf	Carpinus_grandis
Senckenberg Natural History Collections Dresden, Museum of Mineralogy and Geology, Paleobotanical collection	Sf._1787	Seifhennersdorf	Carpinus_grandis
Senckenberg Natural History Collections Dresden, Museum of Mineralogy and Geology, Paleobotanical collection	Sf._1788	Seifhennersdorf	Carpinus_grandis
Senckenberg Natural History Collections Dresden, Museum of Mineralogy and Geology, Paleobotanical collection	Sf._1790:1,2	Seifhennersdorf	Carpinus_grandis
Senckenberg Natural History Collections Dresden, Museum of Mineralogy and Geology, Paleobotanical collection	Sf._1792	Seifhennersdorf	Carpinus_grandis
Senckenberg Natural History Collections Dresden, Museum of Mineralogy and Geology, Paleobotanical collection	Sf._1793	Seifhennersdorf	Carpinus_grandis
Senckenberg Natural History Collections Dresden, Museum of Mineralogy and Geology, Paleobotanical collection	Sf._1794	Seifhennersdorf	Carpinus_grandis
Senckenberg Natural History Collections Dresden, Museum of Mineralogy and Geology, Paleobotanical collection	Sf._1795	Seifhennersdorf	Carpinus_grandis
Senckenberg Natural History Collections Dresden, Museum of Mineralogy and Geology, Paleobotanical collection	Sf._1796	Seifhennersdorf	Carpinus_grandis
Senckenberg Natural History Collections Dresden, Museum of Mineralogy and Geology, Paleobotanical collection	Sf._1797	Seifhennersdorf	Carpinus_grandis
Senckenberg Natural History Collections Dresden, Museum of Mineralogy and Geology, Paleobotanical collection	Sf._1798	Seifhennersdorf	Carpinus_grandis
Senckenberg Natural History Collections Dresden, Museum of Mineralogy and Geology, Paleobotanical collection	Sf._1799	Seifhennersdorf	Carpinus_grandis
Senckenberg Natural History Collections Dresden, Museum of Mineralogy and Geology, Paleobotanical collection	Sf._1802	Seifhennersdorf	Carpinus_grandis
Senckenberg Natural History Collections Dresden, Museum of Mineralogy and Geology, Paleobotanical collection	Sf._1803	Seifhennersdorf	Carpinus_grandis
Senckenberg Natural History Collections Dresden, Museum of Mineralogy and Geology, Paleobotanical collection	Sf._1804	Seifhennersdorf	Carpinus_grandis
Senckenberg Natural History Collections Dresden, Museum of Mineralogy and Geology, Paleobotanical collection	Sf._1806	Seifhennersdorf	Carpinus_grandis
Senckenberg Natural History Collections Dresden, Museum of Mineralogy and Geology, Paleobotanical collection	Sf._1807	Seifhennersdorf	Carpinus_grandis
Senckenberg Natural History Collections Dresden, Museum of Mineralogy and Geology, Paleobotanical collection	Sf._1808	Seifhennersdorf	Carpinus_grandis
Senckenberg Natural History Collections Dresden, Museum of Mineralogy and Geology, Paleobotanical collection	Sf._1809	Seifhennersdorf	Carpinus_grandis
Senckenberg Natural History Collections Dresden, Museum of Mineralogy and Geology, Paleobotanical collection	Sf._1810	Seifhennersdorf	Carpinus_grandis
Senckenberg Natural History Collections Dresden, Museum of Mineralogy and Geology, Paleobotanical collection	Sf._1811	Seifhennersdorf	Carpinus_grandis
Senckenberg Natural History Collections Dresden, Museum of Mineralogy and Geology, Paleobotanical collection	Sf._1812	Seifhennersdorf	Carpinus_grandis
Senckenberg Natural History Collections Dresden, Museum of Mineralogy and Geology, Paleobotanical collection	Sf._1814	Seifhennersdorf	Carpinus_grandis
Senckenberg Natural History Collections Dresden, Museum of Mineralogy and Geology, Paleobotanical collection	Sf._1816a	Seifhennersdorf	Carpinus_grandis
Senckenberg Natural History Collections Dresden, Museum of Mineralogy and Geology, Paleobotanical collection	Sf._1817	Seifhennersdorf	Carpinus_grandis
Senckenberg Natural History Collections Dresden, Museum of Mineralogy and Geology, Paleobotanical collection	Sf._1818	Seifhennersdorf	Carpinus_grandis
Senckenberg Natural History Collections Dresden, Museum of Mineralogy and Geology, Paleobotanical collection	Sf._1819	Seifhennersdorf	Carpinus_grandis
Senckenberg Natural History Collections Dresden, Museum of Mineralogy and Geology, Paleobotanical collection	Sf._1820	Seifhennersdorf	Carpinus_grandis
Senckenberg Natural History Collections Dresden, Museum of Mineralogy and Geology, Paleobotanical collection	Sf._1821	Seifhennersdorf	Carpinus_grandis
Senckenberg Natural History Collections Dresden, Museum of Mineralogy and Geology, Paleobotanical collection	Sf._1822	Seifhennersdorf	Carpinus_grandis
Senckenberg Natural History Collections Dresden, Museum of Mineralogy and Geology, Paleobotanical collection	Sf._1823	Seifhennersdorf	Carpinus_grandis
Senckenberg Natural History Collections Dresden, Museum of Mineralogy and Geology, Paleobotanical collection	Sf._1824	Seifhennersdorf	Carpinus_grandis
Senckenberg Natural History Collections Dresden, Museum of Mineralogy and Geology, Paleobotanical collection	Sf._1825	Seifhennersdorf	Carpinus_grandis
Senckenberg Natural History Collections Dresden, Museum of Mineralogy and Geology, Paleobotanical collection	Sf._1826	Seifhennersdorf	Carpinus_grandis
Senckenberg Natural History Collections Dresden, Museum of Mineralogy and Geology, Paleobotanical collection	Sf._1827	Seifhennersdorf	Carpinus_grandis
Senckenberg Natural History Collections Dresden, Museum of Mineralogy and Geology, Paleobotanical collection	Sf._1828	Seifhennersdorf	Carpinus_grandis
Senckenberg Natural History Collections Dresden, Museum of Mineralogy and Geology, Paleobotanical collection	Sf._1830	Seifhennersdorf	Carpinus_grandis
Senckenberg Natural History Collections Dresden, Museum of Mineralogy and Geology, Paleobotanical collection	Sf._1831	Seifhennersdorf	Carpinus_grandis
Senckenberg Natural History Collections Dresden, Museum of Mineralogy and Geology, Paleobotanical collection	Sf._1833a	Seifhennersdorf	Carpinus_grandis
Senckenberg Natural History Collections Dresden, Museum of Mineralogy and Geology, Paleobotanical collection	Sf._1833b	Seifhennersdorf	Carpinus_grandis
Senckenberg Natural History Collections Dresden, Museum of Mineralogy and Geology, Paleobotanical collection	Sf._1834	Seifhennersdorf	Carpinus_grandis
Senckenberg Natural History Collections Dresden, Museum of Mineralogy and Geology, Paleobotanical collection	Sf._1835	Seifhennersdorf	Carpinus_grandis
Senckenberg Natural History Collections Dresden, Museum of Mineralogy and Geology, Paleobotanical collection	Sf._1837	Seifhennersdorf	Carpinus_grandis
Senckenberg Natural History Collections Dresden, Museum of Mineralogy and Geology, Paleobotanical collection	Sf._1839	Seifhennersdorf	Carpinus_grandis
Senckenberg Natural History Collections Dresden, Museum of Mineralogy and Geology, Paleobotanical collection	Sf._1840/1841	Seifhennersdorf	Carpinus_grandis
Senckenberg Natural History Collections Dresden, Museum of Mineralogy and Geology, Paleobotanical collection	Sf._1843	Seifhennersdorf	Carpinus_grandis
Senckenberg Natural History Collections Dresden, Museum of Mineralogy and Geology, Paleobotanical collection	Sf._1844	Seifhennersdorf	Carpinus_grandis
Senckenberg Natural History Collections Dresden, Museum of Mineralogy and Geology, Paleobotanical collection	Sf._1846	Seifhennersdorf	Carpinus_grandis
Senckenberg Natural History Collections Dresden, Museum of Mineralogy and Geology, Paleobotanical collection	Sf._1848	Seifhennersdorf	Carpinus_grandis
Senckenberg Natural History Collections Dresden, Museum of Mineralogy and Geology, Paleobotanical collection	Sf._1849	Seifhennersdorf	Carpinus_grandis
Senckenberg Natural History Collections Dresden, Museum of Mineralogy and Geology, Paleobotanical collection	Sf._1851	Seifhennersdorf	Carpinus_grandis
Senckenberg Natural History Collections Dresden, Museum of Mineralogy and Geology, Paleobotanical collection	Sf._1853	Seifhennersdorf	Carpinus_grandis
Senckenberg Natural History Collections Dresden, Museum of Mineralogy and Geology, Paleobotanical collection	Sf._1854	Seifhennersdorf	Carpinus_grandis
Senckenberg Natural History Collections Dresden, Museum of Mineralogy and Geology, Paleobotanical collection	Sf._1855a	Seifhennersdorf	Carpinus_grandis
Senckenberg Natural History Collections Dresden, Museum of Mineralogy and Geology, Paleobotanical collection	Sf._1855b	Seifhennersdorf	Carpinus_grandis
Senckenberg Natural History Collections Dresden, Museum of Mineralogy and Geology, Paleobotanical collection	Sf._1856	Seifhennersdorf	Carpinus_grandis
Senckenberg Natural History Collections Dresden, Museum of Mineralogy and Geology, Paleobotanical collection	Sf._1857/1850	Seifhennersdorf	Carpinus_grandis
Senckenberg Natural History Collections Dresden, Museum of Mineralogy and Geology, Paleobotanical collection	Sf._1860	Seifhennersdorf	Carpinus_grandis
Senckenberg Natural History Collections Dresden, Museum of Mineralogy and Geology, Paleobotanical collection	Sf._1861	Seifhennersdorf	Carpinus_grandis
Senckenberg Natural History Collections Dresden, Museum of Mineralogy and Geology, Paleobotanical collection	Sf._1862:1,2a	Seifhennersdorf	Carpinus_grandis
Senckenberg Natural History Collections Dresden, Museum of Mineralogy and Geology, Paleobotanical collection	Sf._1863	Seifhennersdorf	Carpinus_grandis
Senckenberg Natural History Collections Dresden, Museum of Mineralogy and Geology, Paleobotanical collection	Sf._1865	Seifhennersdorf	Carpinus_grandis
Senckenberg Natural History Collections Dresden, Museum of Mineralogy and Geology, Paleobotanical collection	Sf._1866	Seifhennersdorf	Carpinus_grandis
Senckenberg Natural History Collections Dresden, Museum of Mineralogy and Geology, Paleobotanical collection	Sf._1868	Seifhennersdorf	Carpinus_grandis
Senckenberg Natural History Collections Dresden, Museum of Mineralogy and Geology, Paleobotanical collection	Sf._1869	Seifhennersdorf	Carpinus_grandis
Senckenberg Natural History Collections Dresden, Museum of Mineralogy and Geology, Paleobotanical collection	Sf._1870a	Seifhennersdorf	Carpinus_grandis
Senckenberg Natural History Collections Dresden, Museum of Mineralogy and Geology, Paleobotanical collection	Sf._1870b	Seifhennersdorf	Carpinus_grandis
Senckenberg Natural History Collections Dresden, Museum of Mineralogy and Geology, Paleobotanical collection	Sf._1871	Seifhennersdorf	Carpinus_grandis
Senckenberg Natural History Collections Dresden, Museum of Mineralogy and Geology, Paleobotanical collection	Sf._1872	Seifhennersdorf	Carpinus_grandis
Senckenberg Natural History Collections Dresden, Museum of Mineralogy and Geology, Paleobotanical collection	Sf._1873	Seifhennersdorf	Carpinus_grandis
Senckenberg Natural History Collections Dresden, Museum of Mineralogy and Geology, Paleobotanical collection	Sf._1875	Seifhennersdorf	Carpinus_grandis
Senckenberg Natural History Collections Dresden, Museum of Mineralogy and Geology, Paleobotanical collection	Sf._1876	Seifhennersdorf	Carpinus_grandis
Senckenberg Natural History Collections Dresden, Museum of Mineralogy and Geology, Paleobotanical collection	Sf._1878	Seifhennersdorf	Carpinus_grandis
Senckenberg Natural History Collections Dresden, Museum of Mineralogy and Geology, Paleobotanical collection	Sf._1879	Seifhennersdorf	Carpinus_grandis
Senckenberg Natural History Collections Dresden, Museum of Mineralogy and Geology, Paleobotanical collection	Sf._1880	Seifhennersdorf	Carpinus_grandis
Senckenberg Natural History Collections Dresden, Museum of Mineralogy and Geology, Paleobotanical collection	Sf._1881	Seifhennersdorf	Carpinus_grandis
Senckenberg Natural History Collections Dresden, Museum of Mineralogy and Geology, Paleobotanical collection	Sf._1883	Seifhennersdorf	Carpinus_grandis
Senckenberg Natural History Collections Dresden, Museum of Mineralogy and Geology, Paleobotanical collection	Sf._1884	Seifhennersdorf	Carpinus_grandis
Senckenberg Natural History Collections Dresden, Museum of Mineralogy and Geology, Paleobotanical collection	Sf._1885	Seifhennersdorf	Carpinus_grandis
Senckenberg Natural History Collections Dresden, Museum of Mineralogy and Geology, Paleobotanical collection	Sf._1886	Seifhennersdorf	Carpinus_grandis
Senckenberg Natural History Collections Dresden, Museum of Mineralogy and Geology, Paleobotanical collection	Sf._1888	Seifhennersdorf	Carpinus_grandis
Senckenberg Natural History Collections Dresden, Museum of Mineralogy and Geology, Paleobotanical collection	Sf._1890	Seifhennersdorf	Carpinus_grandis
Senckenberg Natural History Collections Dresden, Museum of Mineralogy and Geology, Paleobotanical collection	Sf._1891	Seifhennersdorf	Carpinus_grandis
Senckenberg Natural History Collections Dresden, Museum of Mineralogy and Geology, Paleobotanical collection	Sf._1892	Seifhennersdorf	Carpinus_grandis
Senckenberg Natural History Collections Dresden, Museum of Mineralogy and Geology, Paleobotanical collection	Sf._1893	Seifhennersdorf	Carpinus_grandis
Senckenberg Natural History Collections Dresden, Museum of Mineralogy and Geology, Paleobotanical collection	Sf._1894	Seifhennersdorf	Carpinus_grandis
Senckenberg Natural History Collections Dresden, Museum of Mineralogy and Geology, Paleobotanical collection	Sf._1895	Seifhennersdorf	Carpinus_grandis
Senckenberg Natural History Collections Dresden, Museum of Mineralogy and Geology, Paleobotanical collection	Sf._1896	Seifhennersdorf	Carpinus_grandis
Senckenberg Natural History Collections Dresden, Museum of Mineralogy and Geology, Paleobotanical collection	Sf._1897	Seifhennersdorf	Carpinus_grandis
Senckenberg Natural History Collections Dresden, Museum of Mineralogy and Geology, Paleobotanical collection	Sf._1899	Seifhennersdorf	Carpinus_grandis
Senckenberg Natural History Collections Dresden, Museum of Mineralogy and Geology, Paleobotanical collection	Sf._1900	Seifhennersdorf	Carpinus_grandis
Senckenberg Natural History Collections Dresden, Museum of Mineralogy and Geology, Paleobotanical collection	Sf._1901	Seifhennersdorf	Carpinus_grandis
Senckenberg Natural History Collections Dresden, Museum of Mineralogy and Geology, Paleobotanical collection	Sf._1902	Seifhennersdorf	Carpinus_grandis
Senckenberg Natural History Collections Dresden, Museum of Mineralogy and Geology, Paleobotanical collection	Sf._1904	Seifhennersdorf	Carpinus_grandis
Senckenberg Natural History Collections Dresden, Museum of Mineralogy and Geology, Paleobotanical collection	Sf._1908	Seifhennersdorf	Carpinus_grandis
Senckenberg Natural History Collections Dresden, Museum of Mineralogy and Geology, Paleobotanical collection	Sf._1912	Seifhennersdorf	Carpinus_grandis
Senckenberg Natural History Collections Dresden, Museum of Mineralogy and Geology, Paleobotanical collection	Sf._1913/1903	Seifhennersdorf	Carpinus_grandis
Senckenberg Natural History Collections Dresden, Museum of Mineralogy and Geology, Paleobotanical collection	Sf._1915	Seifhennersdorf	Carpinus_grandis
Senckenberg Natural History Collections Dresden, Museum of Mineralogy and Geology, Paleobotanical collection	Sf._1916	Seifhennersdorf	Carpinus_grandis
Senckenberg Natural History Collections Dresden, Museum of Mineralogy and Geology, Paleobotanical collection	Sf._1918	Seifhennersdorf	Carpinus_grandis
Senckenberg Natural History Collections Dresden, Museum of Mineralogy and Geology, Paleobotanical collection	Sf._1919	Seifhennersdorf	Carpinus_grandis
Senckenberg Natural History Collections Dresden, Museum of Mineralogy and Geology, Paleobotanical collection	Sf._1920	Seifhennersdorf	Carpinus_grandis
Senckenberg Natural History Collections Dresden, Museum of Mineralogy and Geology, Paleobotanical collection	Sf._1921	Seifhennersdorf	Carpinus_grandis
Senckenberg Natural History Collections Dresden, Museum of Mineralogy and Geology, Paleobotanical collection	Sf._1923	Seifhennersdorf	Carpinus_grandis
Senckenberg Natural History Collections Dresden, Museum of Mineralogy and Geology, Paleobotanical collection	Sf._1924	Seifhennersdorf	Carpinus_grandis
Senckenberg Natural History Collections Dresden, Museum of Mineralogy and Geology, Paleobotanical collection	Sf._1925	Seifhennersdorf	Carpinus_grandis
Senckenberg Natural History Collections Dresden, Museum of Mineralogy and Geology, Paleobotanical collection	Sf._1929	Seifhennersdorf	Carpinus_grandis
Senckenberg Natural History Collections Dresden, Museum of Mineralogy and Geology, Paleobotanical collection	Sf._1930	Seifhennersdorf	Carpinus_grandis
Senckenberg Natural History Collections Dresden, Museum of Mineralogy and Geology, Paleobotanical collection	Sf._1931	Seifhennersdorf	Carpinus_grandis
Senckenberg Natural History Collections Dresden, Museum of Mineralogy and Geology, Paleobotanical collection	Sf._1932	Seifhennersdorf	Carpinus_grandis
Senckenberg Natural History Collections Dresden, Museum of Mineralogy and Geology, Paleobotanical collection	Sf._1933	Seifhennersdorf	Carpinus_grandis
Senckenberg Natural History Collections Dresden, Museum of Mineralogy and Geology, Paleobotanical collection	Sf._1934	Seifhennersdorf	Carpinus_grandis
Senckenberg Natural History Collections Dresden, Museum of Mineralogy and Geology, Paleobotanical collection	Sf._1937	Seifhennersdorf	Carpinus_grandis
Senckenberg Natural History Collections Dresden, Museum of Mineralogy and Geology, Paleobotanical collection	Sf._1938	Seifhennersdorf	Carpinus_grandis
Senckenberg Natural History Collections Dresden, Museum of Mineralogy and Geology, Paleobotanical collection	Sf._1939	Seifhennersdorf	Carpinus_grandis
Senckenberg Natural History Collections Dresden, Museum of Mineralogy and Geology, Paleobotanical collection	Sf._1940	Seifhennersdorf	Carpinus_grandis
Senckenberg Natural History Collections Dresden, Museum of Mineralogy and Geology, Paleobotanical collection	Sf._1942	Seifhennersdorf	Carpinus_grandis
Senckenberg Natural History Collections Dresden, Museum of Mineralogy and Geology, Paleobotanical collection	Sf._1944	Seifhennersdorf	Carpinus_grandis
Senckenberg Natural History Collections Dresden, Museum of Mineralogy and Geology, Paleobotanical collection	Sf._1945	Seifhennersdorf	Carpinus_grandis
Senckenberg Natural History Collections Dresden, Museum of Mineralogy and Geology, Paleobotanical collection	Sf._1946	Seifhennersdorf	Carpinus_grandis
Senckenberg Natural History Collections Dresden, Museum of Mineralogy and Geology, Paleobotanical collection	Sf._1947	Seifhennersdorf	Carpinus_grandis
Senckenberg Natural History Collections Dresden, Museum of Mineralogy and Geology, Paleobotanical collection	Sf._1948	Seifhennersdorf	Carpinus_grandis
Senckenberg Natural History Collections Dresden, Museum of Mineralogy and Geology, Paleobotanical collection	Sf._1949	Seifhennersdorf	Carpinus_grandis
Senckenberg Natural History Collections Dresden, Museum of Mineralogy and Geology, Paleobotanical collection	Sf._1952	Seifhennersdorf	Carpinus_grandis
Senckenberg Natural History Collections Dresden, Museum of Mineralogy and Geology, Paleobotanical collection	Sf._1953	Seifhennersdorf	Carpinus_grandis
Senckenberg Natural History Collections Dresden, Museum of Mineralogy and Geology, Paleobotanical collection	Sf._1955	Seifhennersdorf	Carpinus_grandis
Senckenberg Natural History Collections Dresden, Museum of Mineralogy and Geology, Paleobotanical collection	Sf._1956	Seifhennersdorf	Carpinus_grandis
Senckenberg Natural History Collections Dresden, Museum of Mineralogy and Geology, Paleobotanical collection	Sf._1957	Seifhennersdorf	Carpinus_grandis
Senckenberg Natural History Collections Dresden, Museum of Mineralogy and Geology, Paleobotanical collection	Sf._1958	Seifhennersdorf	Carpinus_grandis
Senckenberg Natural History Collections Dresden, Museum of Mineralogy and Geology, Paleobotanical collection	Sf._1959	Seifhennersdorf	Carpinus_grandis
Senckenberg Natural History Collections Dresden, Museum of Mineralogy and Geology, Paleobotanical collection	Sf._1960	Seifhennersdorf	Carpinus_grandis
Senckenberg Natural History Collections Dresden, Museum of Mineralogy and Geology, Paleobotanical collection	Sf._1961	Seifhennersdorf	Carpinus_grandis
Senckenberg Natural History Collections Dresden, Museum of Mineralogy and Geology, Paleobotanical collection	Sf._1962	Seifhennersdorf	Carpinus_grandis
Senckenberg Natural History Collections Dresden, Museum of Mineralogy and Geology, Paleobotanical collection	Sf._1966	Seifhennersdorf	Carpinus_grandis
Senckenberg Natural History Collections Dresden, Museum of Mineralogy and Geology, Paleobotanical collection	Sf._1968	Seifhennersdorf	Carpinus_grandis
Senckenberg Natural History Collections Dresden, Museum of Mineralogy and Geology, Paleobotanical collection	Sf._1969	Seifhennersdorf	Carpinus_grandis
Senckenberg Natural History Collections Dresden, Museum of Mineralogy and Geology, Paleobotanical collection	Sf._1974:1,2	Seifhennersdorf	Carpinus_grandis
Senckenberg Natural History Collections Dresden, Museum of Mineralogy and Geology, Paleobotanical collection	Sf._1975	Seifhennersdorf	Carpinus_grandis
Senckenberg Natural History Collections Dresden, Museum of Mineralogy and Geology, Paleobotanical collection	Sf._1977	Seifhennersdorf	Carpinus_grandis
Senckenberg Natural History Collections Dresden, Museum of Mineralogy and Geology, Paleobotanical collection	Sf._1978	Seifhennersdorf	Carpinus_grandis
Senckenberg Natural History Collections Dresden, Museum of Mineralogy and Geology, Paleobotanical collection	Sf._1979	Seifhennersdorf	Carpinus_grandis
Senckenberg Natural History Collections Dresden, Museum of Mineralogy and Geology, Paleobotanical collection	Sf._1980	Seifhennersdorf	Carpinus_grandis
Senckenberg Natural History Collections Dresden, Museum of Mineralogy and Geology, Paleobotanical collection	Sf._1981a	Seifhennersdorf	Carpinus_grandis
Senckenberg Natural History Collections Dresden, Museum of Mineralogy and Geology, Paleobotanical collection	Sf._1981b	Seifhennersdorf	Carpinus_grandis
Senckenberg Natural History Collections Dresden, Museum of Mineralogy and Geology, Paleobotanical collection	Sf._1982	Seifhennersdorf	Carpinus_grandis
Senckenberg Natural History Collections Dresden, Museum of Mineralogy and Geology, Paleobotanical collection	Sf._1983	Seifhennersdorf	Carpinus_grandis
Senckenberg Natural History Collections Dresden, Museum of Mineralogy and Geology, Paleobotanical collection	Sf._1984	Seifhennersdorf	Carpinus_grandis
Senckenberg Natural History Collections Dresden, Museum of Mineralogy and Geology, Paleobotanical collection	Sf._1985	Seifhennersdorf	Carpinus_grandis
Senckenberg Natural History Collections Dresden, Museum of Mineralogy and Geology, Paleobotanical collection	Sf._1986	Seifhennersdorf	Carpinus_grandis
Senckenberg Natural History Collections Dresden, Museum of Mineralogy and Geology, Paleobotanical collection	Sf._1987	Seifhennersdorf	Carpinus_grandis
Senckenberg Natural History Collections Dresden, Museum of Mineralogy and Geology, Paleobotanical collection	Sf._1988	Seifhennersdorf	Carpinus_grandis
Senckenberg Natural History Collections Dresden, Museum of Mineralogy and Geology, Paleobotanical collection	Sf._1990	Seifhennersdorf	Carpinus_grandis
Senckenberg Natural History Collections Dresden, Museum of Mineralogy and Geology, Paleobotanical collection	Sf._1991	Seifhennersdorf	Carpinus_grandis
Senckenberg Natural History Collections Dresden, Museum of Mineralogy and Geology, Paleobotanical collection	Sf._1992	Seifhennersdorf	Carpinus_grandis
Senckenberg Natural History Collections Dresden, Museum of Mineralogy and Geology, Paleobotanical collection	Sf._1993	Seifhennersdorf	Carpinus_grandis
Senckenberg Natural History Collections Dresden, Museum of Mineralogy and Geology, Paleobotanical collection	Sf._1994	Seifhennersdorf	Carpinus_grandis
Senckenberg Natural History Collections Dresden, Museum of Mineralogy and Geology, Paleobotanical collection	Sf._1996	Seifhennersdorf	Carpinus_grandis
Senckenberg Natural History Collections Dresden, Museum of Mineralogy and Geology, Paleobotanical collection	Sf._1997	Seifhennersdorf	Carpinus_grandis
Senckenberg Natural History Collections Dresden, Museum of Mineralogy and Geology, Paleobotanical collection	Sf._1999	Seifhennersdorf	Carpinus_grandis
Senckenberg Natural History Collections Dresden, Museum of Mineralogy and Geology, Paleobotanical collection	Sf._2001	Seifhennersdorf	Carpinus_grandis
Senckenberg Natural History Collections Dresden, Museum of Mineralogy and Geology, Paleobotanical collection	Sf._2002:1,2	Seifhennersdorf	Carpinus_grandis
Senckenberg Natural History Collections Dresden, Museum of Mineralogy and Geology, Paleobotanical collection	Sf._2003	Seifhennersdorf	Carpinus_grandis
Senckenberg Natural History Collections Dresden, Museum of Mineralogy and Geology, Paleobotanical collection	Sf._2004	Seifhennersdorf	Carpinus_grandis
Senckenberg Natural History Collections Dresden, Museum of Mineralogy and Geology, Paleobotanical collection	Sf._2005	Seifhennersdorf	Carpinus_grandis
Senckenberg Natural History Collections Dresden, Museum of Mineralogy and Geology, Paleobotanical collection	Sf._2006b	Seifhennersdorf	Carpinus_grandis
Senckenberg Natural History Collections Dresden, Museum of Mineralogy and Geology, Paleobotanical collection	Sf._2007	Seifhennersdorf	Carpinus_grandis
Senckenberg Natural History Collections Dresden, Museum of Mineralogy and Geology, Paleobotanical collection	Sf._2008:1,2a	Seifhennersdorf	Carpinus_grandis
Senckenberg Natural History Collections Dresden, Museum of Mineralogy and Geology, Paleobotanical collection	Sf._2010:1,2	Seifhennersdorf	Carpinus_grandis
Senckenberg Natural History Collections Dresden, Museum of Mineralogy and Geology, Paleobotanical collection	Sf._2012:1,2	Seifhennersdorf	Carpinus_grandis
Senckenberg Natural History Collections Dresden, Museum of Mineralogy and Geology, Paleobotanical collection	Sf._2013:1,2	Seifhennersdorf	Carpinus_grandis
Senckenberg Natural History Collections Dresden, Museum of Mineralogy and Geology, Paleobotanical collection	Sf._2014	Seifhennersdorf	Carpinus_grandis
Senckenberg Natural History Collections Dresden, Museum of Mineralogy and Geology, Paleobotanical collection	Sf._2016	Seifhennersdorf	Carpinus_grandis
Senckenberg Natural History Collections Dresden, Museum of Mineralogy and Geology, Paleobotanical collection	Sf._2017:1,2	Seifhennersdorf	Carpinus_grandis
Senckenberg Natural History Collections Dresden, Museum of Mineralogy and Geology, Paleobotanical collection	Sf._2019	Seifhennersdorf	Carpinus_grandis
Senckenberg Natural History Collections Dresden, Museum of Mineralogy and Geology, Paleobotanical collection	Sf._2021:1,2	Seifhennersdorf	Carpinus_grandis
Senckenberg Natural History Collections Dresden, Museum of Mineralogy and Geology, Paleobotanical collection	Sf._2022	Seifhennersdorf	Carpinus_grandis
Senckenberg Natural History Collections Dresden, Museum of Mineralogy and Geology, Paleobotanical collection	Sf._2025	Seifhennersdorf	Carpinus_grandis
Senckenberg Natural History Collections Dresden, Museum of Mineralogy and Geology, Paleobotanical collection	Sf._2026	Seifhennersdorf	Carpinus_grandis
Senckenberg Natural History Collections Dresden, Museum of Mineralogy and Geology, Paleobotanical collection	Sf._2027	Seifhennersdorf	Carpinus_grandis
Senckenberg Natural History Collections Dresden, Museum of Mineralogy and Geology, Paleobotanical collection	Sf._2030	Seifhennersdorf	Carpinus_grandis
Senckenberg Natural History Collections Dresden, Museum of Mineralogy and Geology, Paleobotanical collection	Sf._2031	Seifhennersdorf	Carpinus_grandis
Senckenberg Natural History Collections Dresden, Museum of Mineralogy and Geology, Paleobotanical collection	Sf._2032	Seifhennersdorf	Carpinus_grandis
Senckenberg Natural History Collections Dresden, Museum of Mineralogy and Geology, Paleobotanical collection	Sf._2033	Seifhennersdorf	Carpinus_grandis
Senckenberg Natural History Collections Dresden, Museum of Mineralogy and Geology, Paleobotanical collection	Sf._2035	Seifhennersdorf	Carpinus_grandis
Senckenberg Natural History Collections Dresden, Museum of Mineralogy and Geology, Paleobotanical collection	Sf._2036	Seifhennersdorf	Carpinus_grandis
Senckenberg Natural History Collections Dresden, Museum of Mineralogy and Geology, Paleobotanical collection	Sf._2037	Seifhennersdorf	Carpinus_grandis
Senckenberg Natural History Collections Dresden, Museum of Mineralogy and Geology, Paleobotanical collection	Sf._2038:1,2	Seifhennersdorf	Carpinus_grandis
Senckenberg Natural History Collections Dresden, Museum of Mineralogy and Geology, Paleobotanical collection	Sf._2039	Seifhennersdorf	Carpinus_grandis
Senckenberg Natural History Collections Dresden, Museum of Mineralogy and Geology, Paleobotanical collection	Sf._2040	Seifhennersdorf	Carpinus_grandis
Senckenberg Natural History Collections Dresden, Museum of Mineralogy and Geology, Paleobotanical collection	Sf._2041	Seifhennersdorf	Carpinus_grandis
Senckenberg Natural History Collections Dresden, Museum of Mineralogy and Geology, Paleobotanical collection	Sf._2043	Seifhennersdorf	Carpinus_grandis
Senckenberg Natural History Collections Dresden, Museum of Mineralogy and Geology, Paleobotanical collection	Sf._2044	Seifhennersdorf	Carpinus_grandis
Senckenberg Natural History Collections Dresden, Museum of Mineralogy and Geology, Paleobotanical collection	Sf._2046	Seifhennersdorf	Carpinus_grandis
Senckenberg Natural History Collections Dresden, Museum of Mineralogy and Geology, Paleobotanical collection	Sf._2047	Seifhennersdorf	Carpinus_grandis
Senckenberg Natural History Collections Dresden, Museum of Mineralogy and Geology, Paleobotanical collection	Sf._2048	Seifhennersdorf	Carpinus_grandis
Senckenberg Natural History Collections Dresden, Museum of Mineralogy and Geology, Paleobotanical collection	Sf._2049	Seifhennersdorf	Carpinus_grandis
Senckenberg Natural History Collections Dresden, Museum of Mineralogy and Geology, Paleobotanical collection	Sf._2050	Seifhennersdorf	Carpinus_grandis
Senckenberg Natural History Collections Dresden, Museum of Mineralogy and Geology, Paleobotanical collection	Sf._2051:1,2	Seifhennersdorf	Carpinus_grandis
Senckenberg Natural History Collections Dresden, Museum of Mineralogy and Geology, Paleobotanical collection	Sf._2052a	Seifhennersdorf	Carpinus_grandis
Senckenberg Natural History Collections Dresden, Museum of Mineralogy and Geology, Paleobotanical collection	Sf._2054	Seifhennersdorf	Carpinus_grandis
Senckenberg Natural History Collections Dresden, Museum of Mineralogy and Geology, Paleobotanical collection	Sf._2055	Seifhennersdorf	Carpinus_grandis
Senckenberg Natural History Collections Dresden, Museum of Mineralogy and Geology, Paleobotanical collection	Sf._2057	Seifhennersdorf	Carpinus_grandis
Senckenberg Natural History Collections Dresden, Museum of Mineralogy and Geology, Paleobotanical collection	Sf._2058	Seifhennersdorf	Carpinus_grandis
Senckenberg Natural History Collections Dresden, Museum of Mineralogy and Geology, Paleobotanical collection	Sf._2061:1,2	Seifhennersdorf	Carpinus_grandis
Senckenberg Natural History Collections Dresden, Museum of Mineralogy and Geology, Paleobotanical collection	Sf._2063	Seifhennersdorf	Carpinus_grandis
Senckenberg Natural History Collections Dresden, Museum of Mineralogy and Geology, Paleobotanical collection	Sf._2064	Seifhennersdorf	Carpinus_grandis
Senckenberg Natural History Collections Dresden, Museum of Mineralogy and Geology, Paleobotanical collection	Sf._2067	Seifhennersdorf	Carpinus_grandis
Senckenberg Natural History Collections Dresden, Museum of Mineralogy and Geology, Paleobotanical collection	Sf._2069:1,2	Seifhennersdorf	Carpinus_grandis
Senckenberg Natural History Collections Dresden, Museum of Mineralogy and Geology, Paleobotanical collection	Sf._2070	Seifhennersdorf	Carpinus_grandis
Senckenberg Natural History Collections Dresden, Museum of Mineralogy and Geology, Paleobotanical collection	Sf._2071	Seifhennersdorf	Carpinus_grandis
Senckenberg Natural History Collections Dresden, Museum of Mineralogy and Geology, Paleobotanical collection	Sf._2072	Seifhennersdorf	Carpinus_grandis
Senckenberg Natural History Collections Dresden, Museum of Mineralogy and Geology, Paleobotanical collection	Sf._2073:1,2	Seifhennersdorf	Carpinus_grandis
Senckenberg Natural History Collections Dresden, Museum of Mineralogy and Geology, Paleobotanical collection	Sf._2074	Seifhennersdorf	Carpinus_grandis
Senckenberg Natural History Collections Dresden, Museum of Mineralogy and Geology, Paleobotanical collection	Sf._2075	Seifhennersdorf	Carpinus_grandis
Senckenberg Natural History Collections Dresden, Museum of Mineralogy and Geology, Paleobotanical collection	Sf._2076	Seifhennersdorf	Carpinus_grandis
Senckenberg Natural History Collections Dresden, Museum of Mineralogy and Geology, Paleobotanical collection	Sf._2078:1,2	Seifhennersdorf	Carpinus_grandis
Senckenberg Natural History Collections Dresden, Museum of Mineralogy and Geology, Paleobotanical collection	Sf._2079	Seifhennersdorf	Carpinus_grandis
Senckenberg Natural History Collections Dresden, Museum of Mineralogy and Geology, Paleobotanical collection	Sf._2080	Seifhennersdorf	Carpinus_grandis
Senckenberg Natural History Collections Dresden, Museum of Mineralogy and Geology, Paleobotanical collection	Sf._2081:1,2	Seifhennersdorf	Carpinus_grandis
Senckenberg Natural History Collections Dresden, Museum of Mineralogy and Geology, Paleobotanical collection	Sf._2084:1,2	Seifhennersdorf	Carpinus_grandis
Senckenberg Natural History Collections Dresden, Museum of Mineralogy and Geology, Paleobotanical collection	Sf._2085:1,2	Seifhennersdorf	Carpinus_grandis
Senckenberg Natural History Collections Dresden, Museum of Mineralogy and Geology, Paleobotanical collection	Sf._2086:1,2	Seifhennersdorf	Carpinus_grandis
Senckenberg Natural History Collections Dresden, Museum of Mineralogy and Geology, Paleobotanical collection	Sf._2089	Seifhennersdorf	Carpinus_grandis
Senckenberg Natural History Collections Dresden, Museum of Mineralogy and Geology, Paleobotanical collection	Sf._2090:1,2	Seifhennersdorf	Carpinus_grandis
Senckenberg Natural History Collections Dresden, Museum of Mineralogy and Geology, Paleobotanical collection	Sf._2092	Seifhennersdorf	Carpinus_grandis
Senckenberg Natural History Collections Dresden, Museum of Mineralogy and Geology, Paleobotanical collection	Sf._2093:1,2	Seifhennersdorf	Carpinus_grandis
Senckenberg Natural History Collections Dresden, Museum of Mineralogy and Geology, Paleobotanical collection	Sf._2094	Seifhennersdorf	Carpinus_grandis
Senckenberg Natural History Collections Dresden, Museum of Mineralogy and Geology, Paleobotanical collection	Sf._2095	Seifhennersdorf	Carpinus_grandis
Senckenberg Natural History Collections Dresden, Museum of Mineralogy and Geology, Paleobotanical collection	Sf._2096	Seifhennersdorf	Carpinus_grandis
Senckenberg Natural History Collections Dresden, Museum of Mineralogy and Geology, Paleobotanical collection	Sf._2100	Seifhennersdorf	Carpinus_grandis
Senckenberg Natural History Collections Dresden, Museum of Mineralogy and Geology, Paleobotanical collection	Sf._2101	Seifhennersdorf	Carpinus_grandis
Senckenberg Natural History Collections Dresden, Museum of Mineralogy and Geology, Paleobotanical collection	Sf._2102	Seifhennersdorf	Carpinus_grandis
Senckenberg Natural History Collections Dresden, Museum of Mineralogy and Geology, Paleobotanical collection	Sf._2103	Seifhennersdorf	Carpinus_grandis
Senckenberg Natural History Collections Dresden, Museum of Mineralogy and Geology, Paleobotanical collection	Sf._2104	Seifhennersdorf	Carpinus_grandis
Senckenberg Natural History Collections Dresden, Museum of Mineralogy and Geology, Paleobotanical collection	Sf._2105	Seifhennersdorf	Carpinus_grandis
Senckenberg Natural History Collections Dresden, Museum of Mineralogy and Geology, Paleobotanical collection	Sf._2107	Seifhennersdorf	Carpinus_grandis
Senckenberg Natural History Collections Dresden, Museum of Mineralogy and Geology, Paleobotanical collection	Sf._2109	Seifhennersdorf	Carpinus_grandis
Senckenberg Natural History Collections Dresden, Museum of Mineralogy and Geology, Paleobotanical collection	Sf._2110	Seifhennersdorf	Carpinus_grandis
Senckenberg Natural History Collections Dresden, Museum of Mineralogy and Geology, Paleobotanical collection	Sf._2113	Seifhennersdorf	Carpinus_grandis
Senckenberg Natural History Collections Dresden, Museum of Mineralogy and Geology, Paleobotanical collection	Sf._2114	Seifhennersdorf	Carpinus_grandis
Senckenberg Natural History Collections Dresden, Museum of Mineralogy and Geology, Paleobotanical collection	Sf._2115	Seifhennersdorf	Carpinus_grandis
Senckenberg Natural History Collections Dresden, Museum of Mineralogy and Geology, Paleobotanical collection	Sf._2116	Seifhennersdorf	Carpinus_grandis
Senckenberg Natural History Collections Dresden, Museum of Mineralogy and Geology, Paleobotanical collection	Sf._2117	Seifhennersdorf	Carpinus_grandis
Senckenberg Natural History Collections Dresden, Museum of Mineralogy and Geology, Paleobotanical collection	Sf._2118	Seifhennersdorf	Carpinus_grandis
Senckenberg Natural History Collections Dresden, Museum of Mineralogy and Geology, Paleobotanical collection	Sf._2119	Seifhennersdorf	Carpinus_grandis
Senckenberg Natural History Collections Dresden, Museum of Mineralogy and Geology, Paleobotanical collection	Sf._2120	Seifhennersdorf	Carpinus_grandis
Senckenberg Natural History Collections Dresden, Museum of Mineralogy and Geology, Paleobotanical collection	Sf._2122	Seifhennersdorf	Carpinus_grandis
Senckenberg Natural History Collections Dresden, Museum of Mineralogy and Geology, Paleobotanical collection	Sf._2123	Seifhennersdorf	Carpinus_grandis
Senckenberg Natural History Collections Dresden, Museum of Mineralogy and Geology, Paleobotanical collection	Sf._2129	Seifhennersdorf	Carpinus_grandis
Senckenberg Natural History Collections Dresden, Museum of Mineralogy and Geology, Paleobotanical collection	Sf._2130	Seifhennersdorf	Carpinus_grandis
Senckenberg Natural History Collections Dresden, Museum of Mineralogy and Geology, Paleobotanical collection	Sf._2133	Seifhennersdorf	Carpinus_grandis
Senckenberg Natural History Collections Dresden, Museum of Mineralogy and Geology, Paleobotanical collection	Sf._2134	Seifhennersdorf	Carpinus_grandis
Senckenberg Natural History Collections Dresden, Museum of Mineralogy and Geology, Paleobotanical collection	Sf._2135	Seifhennersdorf	Carpinus_grandis
Senckenberg Natural History Collections Dresden, Museum of Mineralogy and Geology, Paleobotanical collection	Sf._2137	Seifhennersdorf	Carpinus_grandis
Senckenberg Natural History Collections Dresden, Museum of Mineralogy and Geology, Paleobotanical collection	Sf._2138	Seifhennersdorf	Carpinus_grandis
Senckenberg Natural History Collections Dresden, Museum of Mineralogy and Geology, Paleobotanical collection	Sf._2139	Seifhennersdorf	Carpinus_grandis
Senckenberg Natural History Collections Dresden, Museum of Mineralogy and Geology, Paleobotanical collection	Sf._2142	Seifhennersdorf	Carpinus_grandis
Senckenberg Natural History Collections Dresden, Museum of Mineralogy and Geology, Paleobotanical collection	Sf._2143	Seifhennersdorf	Carpinus_grandis
Senckenberg Natural History Collections Dresden, Museum of Mineralogy and Geology, Paleobotanical collection	Sf._2144	Seifhennersdorf	Carpinus_grandis
Senckenberg Natural History Collections Dresden, Museum of Mineralogy and Geology, Paleobotanical collection	Sf._2145	Seifhennersdorf	Carpinus_grandis
Senckenberg Natural History Collections Dresden, Museum of Mineralogy and Geology, Paleobotanical collection	Sf._2146	Seifhennersdorf	Carpinus_grandis
Senckenberg Natural History Collections Dresden, Museum of Mineralogy and Geology, Paleobotanical collection	Sf._2147	Seifhennersdorf	Carpinus_grandis
Senckenberg Natural History Collections Dresden, Museum of Mineralogy and Geology, Paleobotanical collection	Sf._2148	Seifhennersdorf	Carpinus_grandis
Senckenberg Natural History Collections Dresden, Museum of Mineralogy and Geology, Paleobotanical collection	Sf._2149	Seifhennersdorf	Carpinus_grandis
Senckenberg Natural History Collections Dresden, Museum of Mineralogy and Geology, Paleobotanical collection	Sf._2150	Seifhennersdorf	Carpinus_grandis
Senckenberg Natural History Collections Dresden, Museum of Mineralogy and Geology, Paleobotanical collection	Sf._2152	Seifhennersdorf	Carpinus_grandis
Senckenberg Natural History Collections Dresden, Museum of Mineralogy and Geology, Paleobotanical collection	Sf._2154	Seifhennersdorf	Carpinus_grandis
Senckenberg Natural History Collections Dresden, Museum of Mineralogy and Geology, Paleobotanical collection	Sf._2155	Seifhennersdorf	Carpinus_grandis
Senckenberg Natural History Collections Dresden, Museum of Mineralogy and Geology, Paleobotanical collection	Sf._2157	Seifhennersdorf	Carpinus_grandis
Senckenberg Natural History Collections Dresden, Museum of Mineralogy and Geology, Paleobotanical collection	Sf._2158	Seifhennersdorf	Carpinus_grandis
Senckenberg Natural History Collections Dresden, Museum of Mineralogy and Geology, Paleobotanical collection	Sf._2159	Seifhennersdorf	Carpinus_grandis
Senckenberg Natural History Collections Dresden, Museum of Mineralogy and Geology, Paleobotanical collection	Sf._2160	Seifhennersdorf	Carpinus_grandis
Senckenberg Natural History Collections Dresden, Museum of Mineralogy and Geology, Paleobotanical collection	Sf._2161	Seifhennersdorf	Carpinus_grandis
Senckenberg Natural History Collections Dresden, Museum of Mineralogy and Geology, Paleobotanical collection	Sf._2163	Seifhennersdorf	Carpinus_grandis
Senckenberg Natural History Collections Dresden, Museum of Mineralogy and Geology, Paleobotanical collection	Sf._2165	Seifhennersdorf	Carpinus_grandis
Senckenberg Natural History Collections Dresden, Museum of Mineralogy and Geology, Paleobotanical collection	Sf._2167	Seifhennersdorf	Carpinus_grandis
Senckenberg Natural History Collections Dresden, Museum of Mineralogy and Geology, Paleobotanical collection	Sf._2168	Seifhennersdorf	Carpinus_grandis
Senckenberg Natural History Collections Dresden, Museum of Mineralogy and Geology, Paleobotanical collection	Sf._2170	Seifhennersdorf	Carpinus_grandis
Senckenberg Natural History Collections Dresden, Museum of Mineralogy and Geology, Paleobotanical collection	Sf._2172	Seifhennersdorf	Carpinus_grandis
Senckenberg Natural History Collections Dresden, Museum of Mineralogy and Geology, Paleobotanical collection	Sf._2173	Seifhennersdorf	Carpinus_grandis
Senckenberg Natural History Collections Dresden, Museum of Mineralogy and Geology, Paleobotanical collection	Sf._2175:1,2	Seifhennersdorf	Carpinus_grandis
Senckenberg Natural History Collections Dresden, Museum of Mineralogy and Geology, Paleobotanical collection	Sf._2176	Seifhennersdorf	Carpinus_grandis
Senckenberg Natural History Collections Dresden, Museum of Mineralogy and Geology, Paleobotanical collection	Sf._2183	Seifhennersdorf	Carpinus_grandis
Senckenberg Natural History Collections Dresden, Museum of Mineralogy and Geology, Paleobotanical collection	Sf._2185	Seifhennersdorf	Carpinus_grandis
Senckenberg Natural History Collections Dresden, Museum of Mineralogy and Geology, Paleobotanical collection	Sf._2186	Seifhennersdorf	Carpinus_grandis
Senckenberg Natural History Collections Dresden, Museum of Mineralogy and Geology, Paleobotanical collection	Sf._2253	Seifhennersdorf	Carpinus_grandis
Senckenberg Natural History Collections Dresden, Museum of Mineralogy and Geology, Paleobotanical collection	Sf._2707	Seifhennersdorf	Carpinus_grandis
Senckenberg Natural History Collections Dresden, Museum of Mineralogy and Geology, Paleobotanical collection	Sf._2851	Seifhennersdorf	Carpinus_grandis
Senckenberg Natural History Collections Dresden, Museum of Mineralogy and Geology, Paleobotanical collection	Sf._2893	Seifhennersdorf	Carpinus_grandis
Senckenberg Natural History Collections Dresden, Museum of Mineralogy and Geology, Paleobotanical collection	Sf._2993	Seifhennersdorf	Carpinus_grandis
Senckenberg Natural History Collections Dresden, Museum of Mineralogy and Geology, Paleobotanical collection	Sf._3276	Seifhennersdorf	Carpinus_grandis
Senckenberg Natural History Collections Dresden, Museum of Mineralogy and Geology, Paleobotanical collection	Sf._3314	Seifhennersdorf	Carpinus_grandis
Senckenberg Natural History Collections Dresden, Museum of Mineralogy and Geology, Paleobotanical collection	Sf._3315,2	Seifhennersdorf	Carpinus_grandis
Senckenberg Natural History Collections Dresden, Museum of Mineralogy and Geology, Paleobotanical collection	Sf._3327	Seifhennersdorf	Carpinus_grandis
Senckenberg Natural History Collections Dresden, Museum of Mineralogy and Geology, Paleobotanical collection	Sf._3341	Seifhennersdorf	Carpinus_grandis
Senckenberg Natural History Collections Dresden, Museum of Mineralogy and Geology, Paleobotanical collection	Sf._3342	Seifhennersdorf	Carpinus_grandis
Senckenberg Natural History Collections Dresden, Museum of Mineralogy and Geology, Paleobotanical collection	Sf._3355	Seifhennersdorf	Carpinus_grandis
Senckenberg Natural History Collections Dresden, Museum of Mineralogy and Geology, Paleobotanical collection	Sf._3394	Seifhennersdorf	Carpinus_grandis
Senckenberg Natural History Collections Dresden, Museum of Mineralogy and Geology, Paleobotanical collection	Sf._3395	Seifhennersdorf	Carpinus_grandis
Senckenberg Natural History Collections Dresden, Museum of Mineralogy and Geology, Paleobotanical collection	Sf._3396	Seifhennersdorf	Carpinus_grandis
Senckenberg Natural History Collections Dresden, Museum of Mineralogy and Geology, Paleobotanical collection	Sf._3397 (I)	Seifhennersdorf	Carpinus_grandis
Senckenberg Natural History Collections Dresden, Museum of Mineralogy and Geology, Paleobotanical collection	Sf._3399	Seifhennersdorf	Carpinus_grandis
Senckenberg Natural History Collections Dresden, Museum of Mineralogy and Geology, Paleobotanical collection	Sf._3400	Seifhennersdorf	Carpinus_grandis
Senckenberg Natural History Collections Dresden, Museum of Mineralogy and Geology, Paleobotanical collection	Sf._3402:1,2	Seifhennersdorf	Carpinus_grandis
Senckenberg Natural History Collections Dresden, Museum of Mineralogy and Geology, Paleobotanical collection	Sf._3403:1,2	Seifhennersdorf	Carpinus_grandis
Senckenberg Natural History Collections Dresden, Museum of Mineralogy and Geology, Paleobotanical collection	Sf._3406:1,2	Seifhennersdorf	Carpinus_grandis
Senckenberg Natural History Collections Dresden, Museum of Mineralogy and Geology, Paleobotanical collection	Sf._3411:1,2	Seifhennersdorf	Carpinus_grandis
Senckenberg Natural History Collections Dresden, Museum of Mineralogy and Geology, Paleobotanical collection	Sf._3418:1,2	Seifhennersdorf	Carpinus_grandis
Senckenberg Natural History Collections Dresden, Museum of Mineralogy and Geology, Paleobotanical collection	Sf._3419:1,2	Seifhennersdorf	Carpinus_grandis
Senckenberg Natural History Collections Dresden, Museum of Mineralogy and Geology, Paleobotanical collection	Sf._3420:1,2	Seifhennersdorf	Carpinus_grandis
Senckenberg Natural History Collections Dresden, Museum of Mineralogy and Geology, Paleobotanical collection	Sf._3421:1,2	Seifhennersdorf	Carpinus_grandis
Senckenberg Natural History Collections Dresden, Museum of Mineralogy and Geology, Paleobotanical collection	Sf._3425:1,2	Seifhennersdorf	Carpinus_grandis
Senckenberg Natural History Collections Dresden, Museum of Mineralogy and Geology, Paleobotanical collection	Sf._3426:1,2	Seifhennersdorf	Carpinus_grandis
Senckenberg Natural History Collections Dresden, Museum of Mineralogy and Geology, Paleobotanical collection	Sf._3436:1,2	Seifhennersdorf	Carpinus_grandis
Senckenberg Natural History Collections Dresden, Museum of Mineralogy and Geology, Paleobotanical collection	Sf._3438:1,2	Seifhennersdorf	Carpinus_grandis
Senckenberg Natural History Collections Dresden, Museum of Mineralogy and Geology, Paleobotanical collection	Sf._3445	Seifhennersdorf	Carpinus_grandis
Senckenberg Natural History Collections Dresden, Museum of Mineralogy and Geology, Paleobotanical collection	Sf._3447	Seifhennersdorf	Carpinus_grandis
Senckenberg Natural History Collections Dresden, Museum of Mineralogy and Geology, Paleobotanical collection	Sf._3448	Seifhennersdorf	Carpinus_grandis
Senckenberg Natural History Collections Dresden, Museum of Mineralogy and Geology, Paleobotanical collection	Sf._3451	Seifhennersdorf	Carpinus_grandis
Senckenberg Natural History Collections Dresden, Museum of Mineralogy and Geology, Paleobotanical collection	Sf._3452	Seifhennersdorf	Carpinus_grandis
Senckenberg Natural History Collections Dresden, Museum of Mineralogy and Geology, Paleobotanical collection	Sf._3454	Seifhennersdorf	Carpinus_grandis
Senckenberg Natural History Collections Dresden, Museum of Mineralogy and Geology, Paleobotanical collection	Sf._3463:1,2	Seifhennersdorf	Carpinus_grandis
Senckenberg Natural History Collections Dresden, Museum of Mineralogy and Geology, Paleobotanical collection	Sf._3471	Seifhennersdorf	Carpinus_grandis
Senckenberg Natural History Collections Dresden, Museum of Mineralogy and Geology, Paleobotanical collection	Sf._3476	Seifhennersdorf	Carpinus_grandis
Senckenberg Natural History Collections Dresden, Museum of Mineralogy and Geology, Paleobotanical collection	Sf._3475	Seifhennersdorf	Carpinus_grandis
Senckenberg Natural History Collections Dresden, Museum of Mineralogy and Geology, Paleobotanical collection	Sf._3479	Seifhennersdorf	Carpinus_grandis
Senckenberg Natural History Collections Dresden, Museum of Mineralogy and Geology, Paleobotanical collection	Sf._3480	Seifhennersdorf	Carpinus_grandis
Senckenberg Natural History Collections Dresden, Museum of Mineralogy and Geology, Paleobotanical collection	Sf._3486	Seifhennersdorf	Carpinus_grandis
Senckenberg Natural History Collections Dresden, Museum of Mineralogy and Geology, Paleobotanical collection	Sf._3489	Seifhennersdorf	Carpinus_grandis
Senckenberg Natural History Collections Dresden, Museum of Mineralogy and Geology, Paleobotanical collection	Sf._3490	Seifhennersdorf	Carpinus_grandis
Senckenberg Natural History Collections Dresden, Museum of Mineralogy and Geology, Paleobotanical collection	Sf._3500	Seifhennersdorf	Carpinus_grandis
Senckenberg Natural History Collections Dresden, Museum of Mineralogy and Geology, Paleobotanical collection	Sf._3501	Seifhennersdorf	Carpinus_grandis
Senckenberg Natural History Collections Dresden, Museum of Mineralogy and Geology, Paleobotanical collection	Sf._3502	Seifhennersdorf	Carpinus_grandis
Senckenberg Natural History Collections Dresden, Museum of Mineralogy and Geology, Paleobotanical collection	Sf._3508:1,2	Seifhennersdorf	Carpinus_grandis
Senckenberg Natural History Collections Dresden, Museum of Mineralogy and Geology, Paleobotanical collection	Sf._3511:1,2	Seifhennersdorf	Carpinus_grandis
Senckenberg Natural History Collections Dresden, Museum of Mineralogy and Geology, Paleobotanical collection	Sf._3518	Seifhennersdorf	Carpinus_grandis
Senckenberg Natural History Collections Dresden, Museum of Mineralogy and Geology, Paleobotanical collection	Sf._3529	Seifhennersdorf	Carpinus_grandis
Senckenberg Natural History Collections Dresden, Museum of Mineralogy and Geology, Paleobotanical collection	Sf._3531:1,2	Seifhennersdorf	Carpinus_grandis
Senckenberg Natural History Collections Dresden, Museum of Mineralogy and Geology, Paleobotanical collection	Sf._3543:1,2	Seifhennersdorf	Carpinus_grandis
Senckenberg Natural History Collections Dresden, Museum of Mineralogy and Geology, Paleobotanical collection	Sf._3570:1,2	Seifhennersdorf	Carpinus_grandis
Senckenberg Natural History Collections Dresden, Museum of Mineralogy and Geology, Paleobotanical collection	Sf._3697:1,2	Seifhennersdorf	Carpinus_grandis
Senckenberg Natural History Collections Dresden, Museum of Mineralogy and Geology, Paleobotanical collection	Sf._3761b	Seifhennersdorf	Carpinus_grandis
Senckenberg Natural History Collections Dresden, Museum of Mineralogy and Geology, Paleobotanical collection	Sf._3986	Seifhennersdorf	Carpinus_grandis
Senckenberg Natural History Collections Dresden, Museum of Mineralogy and Geology, Paleobotanical collection	Sf._3987	Seifhennersdorf	Carpinus_grandis
Senckenberg Natural History Collections Dresden, Museum of Mineralogy and Geology, Paleobotanical collection	Sf._3991	Seifhennersdorf	Carpinus_grandis
Senckenberg Natural History Collections Dresden, Museum of Mineralogy and Geology, Paleobotanical collection	Sf._4012	Seifhennersdorf	Carpinus_grandis
Senckenberg Natural History Collections Dresden, Museum of Mineralogy and Geology, Paleobotanical collection	Sf._4016	Seifhennersdorf	Carpinus_grandis
Senckenberg Natural History Collections Dresden, Museum of Mineralogy and Geology, Paleobotanical collection	Sf._4017	Seifhennersdorf	Carpinus_grandis
Senckenberg Natural History Collections Dresden, Museum of Mineralogy and Geology, Paleobotanical collection	Sf._4027	Seifhennersdorf	Carpinus_grandis
Senckenberg Natural History Collections Dresden, Museum of Mineralogy and Geology, Paleobotanical collection	Sf._4041	Seifhennersdorf	Carpinus_grandis
Senckenberg Natural History Collections Dresden, Museum of Mineralogy and Geology, Paleobotanical collection	Sf._4053	Seifhennersdorf	Carpinus_grandis
Senckenberg Natural History Collections Dresden, Museum of Mineralogy and Geology, Paleobotanical collection	Sf._4066	Seifhennersdorf	Carpinus_grandis
Senckenberg Natural History Collections Dresden, Museum of Mineralogy and Geology, Paleobotanical collection	Sf._4102	Seifhennersdorf	Carpinus_grandis
Senckenberg Natural History Collections Dresden, Museum of Mineralogy and Geology, Paleobotanical collection	Sf._4103	Seifhennersdorf	Carpinus_grandis
Senckenberg Natural History Collections Dresden, Museum of Mineralogy and Geology, Paleobotanical collection	Sf._4106	Seifhennersdorf	Carpinus_grandis
Senckenberg Natural History Collections Dresden, Museum of Mineralogy and Geology, Paleobotanical collection	Sf._4107	Seifhennersdorf	Carpinus_grandis
Senckenberg Natural History Collections Dresden, Museum of Mineralogy and Geology, Paleobotanical collection	Sf._4108	Seifhennersdorf	Carpinus_grandis
Senckenberg Natural History Collections Dresden, Museum of Mineralogy and Geology, Paleobotanical collection	Sf._4110	Seifhennersdorf	Carpinus_grandis
Senckenberg Natural History Collections Dresden, Museum of Mineralogy and Geology, Paleobotanical collection	Sf._4114	Seifhennersdorf	Carpinus_grandis
Senckenberg Natural History Collections Dresden, Museum of Mineralogy and Geology, Paleobotanical collection	Sf._4131	Seifhennersdorf	Carpinus_grandis
Senckenberg Natural History Collections Dresden, Museum of Mineralogy and Geology, Paleobotanical collection	Sf._4150	Seifhennersdorf	Carpinus_grandis
Senckenberg Natural History Collections Dresden, Museum of Mineralogy and Geology, Paleobotanical collection	Sf._4157	Seifhennersdorf	Carpinus_grandis
Senckenberg Natural History Collections Dresden, Museum of Mineralogy and Geology, Paleobotanical collection	Sf._4177	Seifhennersdorf	Carpinus_grandis
Senckenberg Natural History Collections Dresden, Museum of Mineralogy and Geology, Paleobotanical collection	Sf._4187	Seifhennersdorf	Carpinus_grandis
Senckenberg Natural History Collections Dresden, Museum of Mineralogy and Geology, Paleobotanical collection	Sf._4196	Seifhennersdorf	Carpinus_grandis
Senckenberg Natural History Collections Dresden, Museum of Mineralogy and Geology, Paleobotanical collection	Sf._4202	Seifhennersdorf	Carpinus_grandis
Senckenberg Natural History Collections Dresden, Museum of Mineralogy and Geology, Paleobotanical collection	Sf._4209	Seifhennersdorf	Carpinus_grandis
Senckenberg Natural History Collections Dresden, Museum of Mineralogy and Geology, Paleobotanical collection	Sf._4211	Seifhennersdorf	Carpinus_grandis
Senckenberg Natural History Collections Dresden, Museum of Mineralogy and Geology, Paleobotanical collection	Sf._4215	Seifhennersdorf	Carpinus_grandis
Senckenberg Natural History Collections Dresden, Museum of Mineralogy and Geology, Paleobotanical collection	Sf._4238	Seifhennersdorf	Carpinus_grandis
Senckenberg Natural History Collections Dresden, Museum of Mineralogy and Geology, Paleobotanical collection	Sf._4241	Seifhennersdorf	Carpinus_grandis
Senckenberg Natural History Collections Dresden, Museum of Mineralogy and Geology, Paleobotanical collection	Sf._4243	Seifhennersdorf	Carpinus_grandis
Senckenberg Natural History Collections Dresden, Museum of Mineralogy and Geology, Paleobotanical collection	Sf._4244	Seifhennersdorf	Carpinus_grandis
Senckenberg Natural History Collections Dresden, Museum of Mineralogy and Geology, Paleobotanical collection	Sf._4252	Seifhennersdorf	Carpinus_grandis
Senckenberg Natural History Collections Dresden, Museum of Mineralogy and Geology, Paleobotanical collection	Sf._4257	Seifhennersdorf	Carpinus_grandis
Senckenberg Natural History Collections Dresden, Museum of Mineralogy and Geology, Paleobotanical collection	Sf._4258	Seifhennersdorf	Carpinus_grandis
Senckenberg Natural History Collections Dresden, Museum of Mineralogy and Geology, Paleobotanical collection	Sf._4300	Seifhennersdorf	Carpinus_grandis
Senckenberg Natural History Collections Dresden, Museum of Mineralogy and Geology, Paleobotanical collection	Sf._4334b	Seifhennersdorf	Carpinus_grandis
Senckenberg Natural History Collections Dresden, Museum of Mineralogy and Geology, Paleobotanical collection	Sf._4340	Seifhennersdorf	Carpinus_grandis
Senckenberg Natural History Collections Dresden, Museum of Mineralogy and Geology, Paleobotanical collection	Sf._4343	Seifhennersdorf	Carpinus_grandis
Senckenberg Natural History Collections Dresden, Museum of Mineralogy and Geology, Paleobotanical collection	Sf._4344	Seifhennersdorf	Carpinus_grandis
Senckenberg Natural History Collections Dresden, Museum of Mineralogy and Geology, Paleobotanical collection	Sf._4363	Seifhennersdorf	Carpinus_grandis
Senckenberg Natural History Collections Dresden, Museum of Mineralogy and Geology, Paleobotanical collection	Sf._4434	Seifhennersdorf	Carpinus_grandis
Senckenberg Natural History Collections Dresden, Museum of Mineralogy and Geology, Paleobotanical collection	Sf._4435	Seifhennersdorf	Carpinus_grandis
Senckenberg Natural History Collections Dresden, Museum of Mineralogy and Geology, Paleobotanical collection	Sf._4503:2b	Seifhennersdorf	Carpinus_grandis
Senckenberg Natural History Collections Dresden, Museum of Mineralogy and Geology, Paleobotanical collection	Sf._4510b	Seifhennersdorf	Carpinus_grandis
Senckenberg Natural History Collections Dresden, Museum of Mineralogy and Geology, Paleobotanical collection	Sf._4594:1,2b	Seifhennersdorf	Carpinus_grandis
Senckenberg Natural History Collections Dresden, Museum of Mineralogy and Geology, Paleobotanical collection	Sf._4707	Seifhennersdorf	Carpinus_grandis
Senckenberg Natural History Collections Dresden, Museum of Mineralogy and Geology, Paleobotanical collection	Sf._4710:1,2a	Seifhennersdorf	Carpinus_grandis
Senckenberg Natural History Collections Dresden, Museum of Mineralogy and Geology, Paleobotanical collection	Sf._4710:1,2b	Seifhennersdorf	Carpinus_grandis
Senckenberg Natural History Collections Dresden, Museum of Mineralogy and Geology, Paleobotanical collection	Sf._4711:1,2	Seifhennersdorf	Carpinus_grandis
Senckenberg Natural History Collections Dresden, Museum of Mineralogy and Geology, Paleobotanical collection	Sf._4712:1,2	Seifhennersdorf	Carpinus_grandis
Senckenberg Natural History Collections Dresden, Museum of Mineralogy and Geology, Paleobotanical collection	Sf._4716	Seifhennersdorf	Carpinus_grandis
Senckenberg Natural History Collections Dresden, Museum of Mineralogy and Geology, Paleobotanical collection	Sf._4737:1,2	Seifhennersdorf	Carpinus_grandis
Senckenberg Natural History Collections Dresden, Museum of Mineralogy and Geology, Paleobotanical collection	Sf._4739:1,2	Seifhennersdorf	Carpinus_grandis
Senckenberg Natural History Collections Dresden, Museum of Mineralogy and Geology, Paleobotanical collection	Sf._4742:1,2	Seifhennersdorf	Carpinus_grandis
Senckenberg Natural History Collections Dresden, Museum of Mineralogy and Geology, Paleobotanical collection	Sf._4746:1,2	Seifhennersdorf	Carpinus_grandis
Senckenberg Natural History Collections Dresden, Museum of Mineralogy and Geology, Paleobotanical collection	Sf._4749	Seifhennersdorf	Carpinus_grandis
Senckenberg Natural History Collections Dresden, Museum of Mineralogy and Geology, Paleobotanical collection	Sf._4750a	Seifhennersdorf	Carpinus_grandis
Senckenberg Natural History Collections Dresden, Museum of Mineralogy and Geology, Paleobotanical collection	Sf._4750b	Seifhennersdorf	Carpinus_grandis
Senckenberg Natural History Collections Dresden, Museum of Mineralogy and Geology, Paleobotanical collection	Sf._4752	Seifhennersdorf	Carpinus_grandis
Senckenberg Natural History Collections Dresden, Museum of Mineralogy and Geology, Paleobotanical collection	Sf._4754	Seifhennersdorf	Carpinus_grandis
Senckenberg Natural History Collections Dresden, Museum of Mineralogy and Geology, Paleobotanical collection	Sf._4755	Seifhennersdorf	Carpinus_grandis
Senckenberg Natural History Collections Dresden, Museum of Mineralogy and Geology, Paleobotanical collection	Sf._4757	Seifhennersdorf	Carpinus_grandis
Senckenberg Natural History Collections Dresden, Museum of Mineralogy and Geology, Paleobotanical collection	Sf._4758	Seifhennersdorf	Carpinus_grandis
Senckenberg Natural History Collections Dresden, Museum of Mineralogy and Geology, Paleobotanical collection	Sf._4759	Seifhennersdorf	Carpinus_grandis
Senckenberg Natural History Collections Dresden, Museum of Mineralogy and Geology, Paleobotanical collection	Sf._4760 a	Seifhennersdorf	Carpinus_grandis
Senckenberg Natural History Collections Dresden, Museum of Mineralogy and Geology, Paleobotanical collection	Sf._4760 b	Seifhennersdorf	Carpinus_grandis
Senckenberg Natural History Collections Dresden, Museum of Mineralogy and Geology, Paleobotanical collection	Sf._4766	Seifhennersdorf	Carpinus_grandis
Senckenberg Natural History Collections Dresden, Museum of Mineralogy and Geology, Paleobotanical collection	Sf._4768	Seifhennersdorf	Carpinus_grandis
Senckenberg Natural History Collections Dresden, Museum of Mineralogy and Geology, Paleobotanical collection	Sf._4769	Seifhennersdorf	Carpinus_grandis
Senckenberg Natural History Collections Dresden, Museum of Mineralogy and Geology, Paleobotanical collection	Sf._4773	Seifhennersdorf	Carpinus_grandis
Senckenberg Natural History Collections Dresden, Museum of Mineralogy and Geology, Paleobotanical collection	Sf._4780	Seifhennersdorf	Carpinus_grandis
Senckenberg Natural History Collections Dresden, Museum of Mineralogy and Geology, Paleobotanical collection	Sf._4786 a	Seifhennersdorf	Carpinus_grandis
Senckenberg Natural History Collections Dresden, Museum of Mineralogy and Geology, Paleobotanical collection	Sf._4786 a	Seifhennersdorf	Carpinus_grandis
Senckenberg Natural History Collections Dresden, Museum of Mineralogy and Geology, Paleobotanical collection	Sf._4787b	Seifhennersdorf	Carpinus_grandis
Senckenberg Natural History Collections Dresden, Museum of Mineralogy and Geology, Paleobotanical collection	Sf._4792	Seifhennersdorf	Carpinus_grandis
Senckenberg Natural History Collections Dresden, Museum of Mineralogy and Geology, Paleobotanical collection	Sf._4793	Seifhennersdorf	Carpinus_grandis
Senckenberg Natural History Collections Dresden, Museum of Mineralogy and Geology, Paleobotanical collection	Sf._4799	Seifhennersdorf	Carpinus_grandis
Senckenberg Natural History Collections Dresden, Museum of Mineralogy and Geology, Paleobotanical collection	Sf._4800	Seifhennersdorf	Carpinus_grandis
Senckenberg Natural History Collections Dresden, Museum of Mineralogy and Geology, Paleobotanical collection	Sf._4802	Seifhennersdorf	Carpinus_grandis
Senckenberg Natural History Collections Dresden, Museum of Mineralogy and Geology, Paleobotanical collection	Sf._4805:1,2	Seifhennersdorf	Carpinus_grandis
Senckenberg Natural History Collections Dresden, Museum of Mineralogy and Geology, Paleobotanical collection	Sf._4810a	Seifhennersdorf	Carpinus_grandis
Senckenberg Natural History Collections Dresden, Museum of Mineralogy and Geology, Paleobotanical collection	Sf._4810b	Seifhennersdorf	Carpinus_grandis
Senckenberg Natural History Collections Dresden, Museum of Mineralogy and Geology, Paleobotanical collection	Sf._4814	Seifhennersdorf	Carpinus_grandis
Senckenberg Natural History Collections Dresden, Museum of Mineralogy and Geology, Paleobotanical collection	Sf._4815/4824	Seifhennersdorf	Carpinus_grandis
Senckenberg Natural History Collections Dresden, Museum of Mineralogy and Geology, Paleobotanical collection	Sf._4823	Seifhennersdorf	Carpinus_grandis
Senckenberg Natural History Collections Dresden, Museum of Mineralogy and Geology, Paleobotanical collection	Sf._4833	Seifhennersdorf	Carpinus_grandis
Senckenberg Natural History Collections Dresden, Museum of Mineralogy and Geology, Paleobotanical collection	Sf._4835	Seifhennersdorf	Carpinus_grandis
Senckenberg Natural History Collections Dresden, Museum of Mineralogy and Geology, Paleobotanical collection	Sf._4837a	Seifhennersdorf	Carpinus_grandis
Senckenberg Natural History Collections Dresden, Museum of Mineralogy and Geology, Paleobotanical collection	Sf._4838	Seifhennersdorf	Carpinus_grandis
Senckenberg Natural History Collections Dresden, Museum of Mineralogy and Geology, Paleobotanical collection	Sf._4852	Seifhennersdorf	Carpinus_grandis
Senckenberg Natural History Collections Dresden, Museum of Mineralogy and Geology, Paleobotanical collection	Sf._4853	Seifhennersdorf	Carpinus_grandis
Senckenberg Natural History Collections Dresden, Museum of Mineralogy and Geology, Paleobotanical collection	Sf._4865	Seifhennersdorf	Carpinus_grandis
Senckenberg Natural History Collections Dresden, Museum of Mineralogy and Geology, Paleobotanical collection	Sf._4870	Seifhennersdorf	Carpinus_grandis
Senckenberg Natural History Collections Dresden, Museum of Mineralogy and Geology, Paleobotanical collection	Sf._4879	Seifhennersdorf	Carpinus_grandis
Senckenberg Natural History Collections Dresden, Museum of Mineralogy and Geology, Paleobotanical collection	Sf._4880:1,2	Seifhennersdorf	Carpinus_grandis
Senckenberg Natural History Collections Dresden, Museum of Mineralogy and Geology, Paleobotanical collection	Sf._4884	Seifhennersdorf	Carpinus_grandis
Senckenberg Natural History Collections Dresden, Museum of Mineralogy and Geology, Paleobotanical collection	Sf._4890	Seifhennersdorf	Carpinus_grandis
Senckenberg Natural History Collections Dresden, Museum of Mineralogy and Geology, Paleobotanical collection	Sf._4891	Seifhennersdorf	Carpinus_grandis
Senckenberg Natural History Collections Dresden, Museum of Mineralogy and Geology, Paleobotanical collection	Sf._4893a	Seifhennersdorf	Carpinus_grandis
Senckenberg Natural History Collections Dresden, Museum of Mineralogy and Geology, Paleobotanical collection	Sf._4896	Seifhennersdorf	Carpinus_grandis
Senckenberg Natural History Collections Dresden, Museum of Mineralogy and Geology, Paleobotanical collection	Sf._4897	Seifhennersdorf	Carpinus_grandis
Senckenberg Natural History Collections Dresden, Museum of Mineralogy and Geology, Paleobotanical collection	Sf._4898	Seifhennersdorf	Carpinus_grandis
Senckenberg Natural History Collections Dresden, Museum of Mineralogy and Geology, Paleobotanical collection	Sf._4903	Seifhennersdorf	Carpinus_grandis
Senckenberg Natural History Collections Dresden, Museum of Mineralogy and Geology, Paleobotanical collection	Sf._4907	Seifhennersdorf	Carpinus_grandis
Senckenberg Natural History Collections Dresden, Museum of Mineralogy and Geology, Paleobotanical collection	Sf._4909:1,2	Seifhennersdorf	Carpinus_grandis
Senckenberg Natural History Collections Dresden, Museum of Mineralogy and Geology, Paleobotanical collection	Sf._4910a	Seifhennersdorf	Carpinus_grandis
Senckenberg Natural History Collections Dresden, Museum of Mineralogy and Geology, Paleobotanical collection	Sf._4911	Seifhennersdorf	Carpinus_grandis
Senckenberg Natural History Collections Dresden, Museum of Mineralogy and Geology, Paleobotanical collection	Sf._4913	Seifhennersdorf	Carpinus_grandis
Senckenberg Natural History Collections Dresden, Museum of Mineralogy and Geology, Paleobotanical collection	Sf._4914	Seifhennersdorf	Carpinus_grandis
Senckenberg Natural History Collections Dresden, Museum of Mineralogy and Geology, Paleobotanical collection	Sf._4917	Seifhennersdorf	Carpinus_grandis
Senckenberg Natural History Collections Dresden, Museum of Mineralogy and Geology, Paleobotanical collection	Sf._4920	Seifhennersdorf	Carpinus_grandis
Senckenberg Natural History Collections Dresden, Museum of Mineralogy and Geology, Paleobotanical collection	Sf._4923	Seifhennersdorf	Carpinus_grandis
Senckenberg Natural History Collections Dresden, Museum of Mineralogy and Geology, Paleobotanical collection	Sf._4924	Seifhennersdorf	Carpinus_grandis
Senckenberg Natural History Collections Dresden, Museum of Mineralogy and Geology, Paleobotanical collection	Sf._4925	Seifhennersdorf	Carpinus_grandis
Senckenberg Natural History Collections Dresden, Museum of Mineralogy and Geology, Paleobotanical collection	Sf._4926	Seifhennersdorf	Carpinus_grandis
Senckenberg Natural History Collections Dresden, Museum of Mineralogy and Geology, Paleobotanical collection	Sf._4927	Seifhennersdorf	Carpinus_grandis
Senckenberg Natural History Collections Dresden, Museum of Mineralogy and Geology, Paleobotanical collection	Sf._4928	Seifhennersdorf	Carpinus_grandis
Senckenberg Natural History Collections Dresden, Museum of Mineralogy and Geology, Paleobotanical collection	Sf._4930a	Seifhennersdorf	Carpinus_grandis
Senckenberg Natural History Collections Dresden, Museum of Mineralogy and Geology, Paleobotanical collection	Sf._4931 (I)	Seifhennersdorf	Carpinus_grandis
Senckenberg Natural History Collections Dresden, Museum of Mineralogy and Geology, Paleobotanical collection	Sf._4932	Seifhennersdorf	Carpinus_grandis
Senckenberg Natural History Collections Dresden, Museum of Mineralogy and Geology, Paleobotanical collection	Sf._4936	Seifhennersdorf	Carpinus_grandis
Senckenberg Natural History Collections Dresden, Museum of Mineralogy and Geology, Paleobotanical collection	Sf._4937	Seifhennersdorf	Carpinus_grandis
Senckenberg Natural History Collections Dresden, Museum of Mineralogy and Geology, Paleobotanical collection	Sf._4938	Seifhennersdorf	Carpinus_grandis
Senckenberg Natural History Collections Dresden, Museum of Mineralogy and Geology, Paleobotanical collection	Sf._4939	Seifhennersdorf	Carpinus_grandis
Senckenberg Natural History Collections Dresden, Museum of Mineralogy and Geology, Paleobotanical collection	Sf._4940	Seifhennersdorf	Carpinus_grandis
Senckenberg Natural History Collections Dresden, Museum of Mineralogy and Geology, Paleobotanical collection	Sf._4941	Seifhennersdorf	Carpinus_grandis
Senckenberg Natural History Collections Dresden, Museum of Mineralogy and Geology, Paleobotanical collection	Sf._4942	Seifhennersdorf	Carpinus_grandis
Senckenberg Natural History Collections Dresden, Museum of Mineralogy and Geology, Paleobotanical collection	Sf._4943	Seifhennersdorf	Carpinus_grandis
Senckenberg Natural History Collections Dresden, Museum of Mineralogy and Geology, Paleobotanical collection	Sf._4944	Seifhennersdorf	Carpinus_grandis
Senckenberg Natural History Collections Dresden, Museum of Mineralogy and Geology, Paleobotanical collection	Sf._4947	Seifhennersdorf	Carpinus_grandis
Senckenberg Natural History Collections Dresden, Museum of Mineralogy and Geology, Paleobotanical collection	Sf._4949	Seifhennersdorf	Carpinus_grandis
Senckenberg Natural History Collections Dresden, Museum of Mineralogy and Geology, Paleobotanical collection	Sf._4951	Seifhennersdorf	Carpinus_grandis
Senckenberg Natural History Collections Dresden, Museum of Mineralogy and Geology, Paleobotanical collection	Sf._4953	Seifhennersdorf	Carpinus_grandis
Senckenberg Natural History Collections Dresden, Museum of Mineralogy and Geology, Paleobotanical collection	Sf._4954	Seifhennersdorf	Carpinus_grandis
Senckenberg Natural History Collections Dresden, Museum of Mineralogy and Geology, Paleobotanical collection	Sf._4955	Seifhennersdorf	Carpinus_grandis
Senckenberg Natural History Collections Dresden, Museum of Mineralogy and Geology, Paleobotanical collection	Sf._4956	Seifhennersdorf	Carpinus_grandis
Senckenberg Natural History Collections Dresden, Museum of Mineralogy and Geology, Paleobotanical collection	Sf._4957	Seifhennersdorf	Carpinus_grandis
Senckenberg Natural History Collections Dresden, Museum of Mineralogy and Geology, Paleobotanical collection	Sf._4958	Seifhennersdorf	Carpinus_grandis
Senckenberg Natural History Collections Dresden, Museum of Mineralogy and Geology, Paleobotanical collection	Sf._4959	Seifhennersdorf	Carpinus_grandis
Senckenberg Natural History Collections Dresden, Museum of Mineralogy and Geology, Paleobotanical collection	Sf._4964	Seifhennersdorf	Carpinus_grandis
Senckenberg Natural History Collections Dresden, Museum of Mineralogy and Geology, Paleobotanical collection	Sf._4965	Seifhennersdorf	Carpinus_grandis
Senckenberg Natural History Collections Dresden, Museum of Mineralogy and Geology, Paleobotanical collection	Sf._4966	Seifhennersdorf	Carpinus_grandis
Senckenberg Natural History Collections Dresden, Museum of Mineralogy and Geology, Paleobotanical collection	Sf._4968	Seifhennersdorf	Carpinus_grandis
Senckenberg Natural History Collections Dresden, Museum of Mineralogy and Geology, Paleobotanical collection	Sf._4969	Seifhennersdorf	Carpinus_grandis
Senckenberg Natural History Collections Dresden, Museum of Mineralogy and Geology, Paleobotanical collection	Sf._4970	Seifhennersdorf	Carpinus_grandis
Senckenberg Natural History Collections Dresden, Museum of Mineralogy and Geology, Paleobotanical collection	Sf._4971:1,2	Seifhennersdorf	Carpinus_grandis
Senckenberg Natural History Collections Dresden, Museum of Mineralogy and Geology, Paleobotanical collection	Sf._4973	Seifhennersdorf	Carpinus_grandis
Senckenberg Natural History Collections Dresden, Museum of Mineralogy and Geology, Paleobotanical collection	Sf._4976	Seifhennersdorf	Carpinus_grandis
Senckenberg Natural History Collections Dresden, Museum of Mineralogy and Geology, Paleobotanical collection	Sf._4977	Seifhennersdorf	Carpinus_grandis
Senckenberg Natural History Collections Dresden, Museum of Mineralogy and Geology, Paleobotanical collection	Sf._4978	Seifhennersdorf	Carpinus_grandis
Senckenberg Natural History Collections Dresden, Museum of Mineralogy and Geology, Paleobotanical collection	Sf._4979	Seifhennersdorf	Carpinus_grandis
Senckenberg Natural History Collections Dresden, Museum of Mineralogy and Geology, Paleobotanical collection	Sf._4980	Seifhennersdorf	Carpinus_grandis
Senckenberg Natural History Collections Dresden, Museum of Mineralogy and Geology, Paleobotanical collection	Sf._4981	Seifhennersdorf	Carpinus_grandis
Senckenberg Natural History Collections Dresden, Museum of Mineralogy and Geology, Paleobotanical collection	Sf._4983	Seifhennersdorf	Carpinus_grandis
Senckenberg Natural History Collections Dresden, Museum of Mineralogy and Geology, Paleobotanical collection	Sf._4984	Seifhennersdorf	Carpinus_grandis
Senckenberg Natural History Collections Dresden, Museum of Mineralogy and Geology, Paleobotanical collection	Sf._4985	Seifhennersdorf	Carpinus_grandis
Senckenberg Natural History Collections Dresden, Museum of Mineralogy and Geology, Paleobotanical collection	Sf._4987:1,2	Seifhennersdorf	Carpinus_grandis
Senckenberg Natural History Collections Dresden, Museum of Mineralogy and Geology, Paleobotanical collection	Sf._4988:1,2	Seifhennersdorf	Carpinus_grandis
Senckenberg Natural History Collections Dresden, Museum of Mineralogy and Geology, Paleobotanical collection	Sf._4989:1,2	Seifhennersdorf	Carpinus_grandis
Senckenberg Natural History Collections Dresden, Museum of Mineralogy and Geology, Paleobotanical collection	Sf._4991	Seifhennersdorf	Carpinus_grandis
Senckenberg Natural History Collections Dresden, Museum of Mineralogy and Geology, Paleobotanical collection	Sf._4992	Seifhennersdorf	Carpinus_grandis
Senckenberg Natural History Collections Dresden, Museum of Mineralogy and Geology, Paleobotanical collection	Sf._4994	Seifhennersdorf	Carpinus_grandis
Senckenberg Natural History Collections Dresden, Museum of Mineralogy and Geology, Paleobotanical collection	Sf._4995	Seifhennersdorf	Carpinus_grandis
Senckenberg Natural History Collections Dresden, Museum of Mineralogy and Geology, Paleobotanical collection	Sf._4996	Seifhennersdorf	Carpinus_grandis
Senckenberg Natural History Collections Dresden, Museum of Mineralogy and Geology, Paleobotanical collection	Sf._4997	Seifhennersdorf	Carpinus_grandis
Senckenberg Natural History Collections Dresden, Museum of Mineralogy and Geology, Paleobotanical collection	Sf._5000	Seifhennersdorf	Carpinus_grandis
Senckenberg Natural History Collections Dresden, Museum of Mineralogy and Geology, Paleobotanical collection	Sf._5001	Seifhennersdorf	Carpinus_grandis
Senckenberg Natural History Collections Dresden, Museum of Mineralogy and Geology, Paleobotanical collection	Sf._5002	Seifhennersdorf	Carpinus_grandis
Senckenberg Natural History Collections Dresden, Museum of Mineralogy and Geology, Paleobotanical collection	Sf._5003	Seifhennersdorf	Carpinus_grandis
Senckenberg Natural History Collections Dresden, Museum of Mineralogy and Geology, Paleobotanical collection	Sf._5004	Seifhennersdorf	Carpinus_grandis
Senckenberg Natural History Collections Dresden, Museum of Mineralogy and Geology, Paleobotanical collection	Sf._5005	Seifhennersdorf	Carpinus_grandis
Senckenberg Natural History Collections Dresden, Museum of Mineralogy and Geology, Paleobotanical collection	Sf._5006	Seifhennersdorf	Carpinus_grandis
Senckenberg Natural History Collections Dresden, Museum of Mineralogy and Geology, Paleobotanical collection	Sf._5007	Seifhennersdorf	Carpinus_grandis
Senckenberg Natural History Collections Dresden, Museum of Mineralogy and Geology, Paleobotanical collection	Sf._5009	Seifhennersdorf	Carpinus_grandis
Senckenberg Natural History Collections Dresden, Museum of Mineralogy and Geology, Paleobotanical collection	Sf._5011	Seifhennersdorf	Carpinus_grandis
Senckenberg Natural History Collections Dresden, Museum of Mineralogy and Geology, Paleobotanical collection	Sf._5012	Seifhennersdorf	Carpinus_grandis
Senckenberg Natural History Collections Dresden, Museum of Mineralogy and Geology, Paleobotanical collection	Sf._5013	Seifhennersdorf	Carpinus_grandis
Senckenberg Natural History Collections Dresden, Museum of Mineralogy and Geology, Paleobotanical collection	Sf._5014	Seifhennersdorf	Carpinus_grandis
Senckenberg Natural History Collections Dresden, Museum of Mineralogy and Geology, Paleobotanical collection	Sf._5016	Seifhennersdorf	Carpinus_grandis
Senckenberg Natural History Collections Dresden, Museum of Mineralogy and Geology, Paleobotanical collection	Sf._5019	Seifhennersdorf	Carpinus_grandis
Senckenberg Natural History Collections Dresden, Museum of Mineralogy and Geology, Paleobotanical collection	Sf._5022	Seifhennersdorf	Carpinus_grandis
Senckenberg Natural History Collections Dresden, Museum of Mineralogy and Geology, Paleobotanical collection	Sf._5023	Seifhennersdorf	Carpinus_grandis
Senckenberg Natural History Collections Dresden, Museum of Mineralogy and Geology, Paleobotanical collection	Sf._5024	Seifhennersdorf	Carpinus_grandis
Senckenberg Natural History Collections Dresden, Museum of Mineralogy and Geology, Paleobotanical collection	Sf._5025	Seifhennersdorf	Carpinus_grandis
Senckenberg Natural History Collections Dresden, Museum of Mineralogy and Geology, Paleobotanical collection	Sf._5026	Seifhennersdorf	Carpinus_grandis
Senckenberg Natural History Collections Dresden, Museum of Mineralogy and Geology, Paleobotanical collection	Sf._5027	Seifhennersdorf	Carpinus_grandis
Senckenberg Natural History Collections Dresden, Museum of Mineralogy and Geology, Paleobotanical collection	Sf._5029	Seifhennersdorf	Carpinus_grandis
Senckenberg Natural History Collections Dresden, Museum of Mineralogy and Geology, Paleobotanical collection	Sf._5030	Seifhennersdorf	Carpinus_grandis
Senckenberg Natural History Collections Dresden, Museum of Mineralogy and Geology, Paleobotanical collection	Sf._5032	Seifhennersdorf	Carpinus_grandis
Senckenberg Natural History Collections Dresden, Museum of Mineralogy and Geology, Paleobotanical collection	Sf._5038	Seifhennersdorf	Carpinus_grandis
Senckenberg Natural History Collections Dresden, Museum of Mineralogy and Geology, Paleobotanical collection	Sf._5039	Seifhennersdorf	Carpinus_grandis
Senckenberg Natural History Collections Dresden, Museum of Mineralogy and Geology, Paleobotanical collection	Sf._5040	Seifhennersdorf	Carpinus_grandis
Senckenberg Natural History Collections Dresden, Museum of Mineralogy and Geology, Paleobotanical collection	Sf._5043	Seifhennersdorf	Carpinus_grandis
Senckenberg Natural History Collections Dresden, Museum of Mineralogy and Geology, Paleobotanical collection	Sf._5045b	Seifhennersdorf	Carpinus_grandis
Senckenberg Natural History Collections Dresden, Museum of Mineralogy and Geology, Paleobotanical collection	Sf._5046	Seifhennersdorf	Carpinus_grandis
Senckenberg Natural History Collections Dresden, Museum of Mineralogy and Geology, Paleobotanical collection	Sf._5047	Seifhennersdorf	Carpinus_grandis
Senckenberg Natural History Collections Dresden, Museum of Mineralogy and Geology, Paleobotanical collection	Sf._5049	Seifhennersdorf	Carpinus_grandis
Senckenberg Natural History Collections Dresden, Museum of Mineralogy and Geology, Paleobotanical collection	Sf._5050	Seifhennersdorf	Carpinus_grandis
Senckenberg Natural History Collections Dresden, Museum of Mineralogy and Geology, Paleobotanical collection	Sf._5052	Seifhennersdorf	Carpinus_grandis
Senckenberg Natural History Collections Dresden, Museum of Mineralogy and Geology, Paleobotanical collection	Sf._5055	Seifhennersdorf	Carpinus_grandis
Senckenberg Natural History Collections Dresden, Museum of Mineralogy and Geology, Paleobotanical collection	Sf._5057:1,2	Seifhennersdorf	Carpinus_grandis
Senckenberg Natural History Collections Dresden, Museum of Mineralogy and Geology, Paleobotanical collection	Sf._5058:1,2	Seifhennersdorf	Carpinus_grandis
Senckenberg Natural History Collections Dresden, Museum of Mineralogy and Geology, Paleobotanical collection	Sf._5061	Seifhennersdorf	Carpinus_grandis
Senckenberg Natural History Collections Dresden, Museum of Mineralogy and Geology, Paleobotanical collection	Sf._5063	Seifhennersdorf	Carpinus_grandis
Senckenberg Natural History Collections Dresden, Museum of Mineralogy and Geology, Paleobotanical collection	Sf._5064:1,2,3	Seifhennersdorf	Carpinus_grandis
Senckenberg Natural History Collections Dresden, Museum of Mineralogy and Geology, Paleobotanical collection	Sf._5066	Seifhennersdorf	Carpinus_grandis
Senckenberg Natural History Collections Dresden, Museum of Mineralogy and Geology, Paleobotanical collection	Sf._5069	Seifhennersdorf	Carpinus_grandis
Senckenberg Natural History Collections Dresden, Museum of Mineralogy and Geology, Paleobotanical collection	Sf._5073	Seifhennersdorf	Carpinus_grandis
Senckenberg Natural History Collections Dresden, Museum of Mineralogy and Geology, Paleobotanical collection	Sf._5074	Seifhennersdorf	Carpinus_grandis
Senckenberg Natural History Collections Dresden, Museum of Mineralogy and Geology, Paleobotanical collection	Sf._5077	Seifhennersdorf	Carpinus_grandis
Senckenberg Natural History Collections Dresden, Museum of Mineralogy and Geology, Paleobotanical collection	Sf._5078	Seifhennersdorf	Carpinus_grandis
Senckenberg Natural History Collections Dresden, Museum of Mineralogy and Geology, Paleobotanical collection	Sf._5081	Seifhennersdorf	Carpinus_grandis
Senckenberg Natural History Collections Dresden, Museum of Mineralogy and Geology, Paleobotanical collection	Sf._5082	Seifhennersdorf	Carpinus_grandis
Senckenberg Natural History Collections Dresden, Museum of Mineralogy and Geology, Paleobotanical collection	Sf._5091	Seifhennersdorf	Carpinus_grandis
Senckenberg Natural History Collections Dresden, Museum of Mineralogy and Geology, Paleobotanical collection	Sf._5092	Seifhennersdorf	Carpinus_grandis
Senckenberg Natural History Collections Dresden, Museum of Mineralogy and Geology, Paleobotanical collection	Sf._5093	Seifhennersdorf	Carpinus_grandis
Senckenberg Natural History Collections Dresden, Museum of Mineralogy and Geology, Paleobotanical collection	Sf._5094	Seifhennersdorf	Carpinus_grandis
Senckenberg Natural History Collections Dresden, Museum of Mineralogy and Geology, Paleobotanical collection	Sf._5096	Seifhennersdorf	Carpinus_grandis
Senckenberg Natural History Collections Dresden, Museum of Mineralogy and Geology, Paleobotanical collection	Sf._5099	Seifhennersdorf	Carpinus_grandis
Senckenberg Natural History Collections Dresden, Museum of Mineralogy and Geology, Paleobotanical collection	Sf._5100	Seifhennersdorf	Carpinus_grandis
Senckenberg Natural History Collections Dresden, Museum of Mineralogy and Geology, Paleobotanical collection	Sf._5102	Seifhennersdorf	Carpinus_grandis
Senckenberg Natural History Collections Dresden, Museum of Mineralogy and Geology, Paleobotanical collection	Sf._5103	Seifhennersdorf	Carpinus_grandis
Senckenberg Natural History Collections Dresden, Museum of Mineralogy and Geology, Paleobotanical collection	Sf._5104	Seifhennersdorf	Carpinus_grandis
Senckenberg Natural History Collections Dresden, Museum of Mineralogy and Geology, Paleobotanical collection	Sf._5109	Seifhennersdorf	Carpinus_grandis
Senckenberg Natural History Collections Dresden, Museum of Mineralogy and Geology, Paleobotanical collection	Sf._5111	Seifhennersdorf	Carpinus_grandis
Senckenberg Natural History Collections Dresden, Museum of Mineralogy and Geology, Paleobotanical collection	Sf._5112:1,2	Seifhennersdorf	Carpinus_grandis
Senckenberg Natural History Collections Dresden, Museum of Mineralogy and Geology, Paleobotanical collection	Sf._5114:1,2	Seifhennersdorf	Carpinus_grandis
Senckenberg Natural History Collections Dresden, Museum of Mineralogy and Geology, Paleobotanical collection	Sf._5115	Seifhennersdorf	Carpinus_grandis
Senckenberg Natural History Collections Dresden, Museum of Mineralogy and Geology, Paleobotanical collection	Sf._5117	Seifhennersdorf	Carpinus_grandis
Senckenberg Natural History Collections Dresden, Museum of Mineralogy and Geology, Paleobotanical collection	Sf._5120	Seifhennersdorf	Carpinus_grandis
Senckenberg Natural History Collections Dresden, Museum of Mineralogy and Geology, Paleobotanical collection	Sf._5122	Seifhennersdorf	Carpinus_grandis
Senckenberg Natural History Collections Dresden, Museum of Mineralogy and Geology, Paleobotanical collection	Sf._5123	Seifhennersdorf	Carpinus_grandis
Senckenberg Natural History Collections Dresden, Museum of Mineralogy and Geology, Paleobotanical collection	Sf._5126	Seifhennersdorf	Carpinus_grandis
Senckenberg Natural History Collections Dresden, Museum of Mineralogy and Geology, Paleobotanical collection	Sf._5127	Seifhennersdorf	Carpinus_grandis
Senckenberg Natural History Collections Dresden, Museum of Mineralogy and Geology, Paleobotanical collection	Sf._5128	Seifhennersdorf	Carpinus_grandis
Senckenberg Natural History Collections Dresden, Museum of Mineralogy and Geology, Paleobotanical collection	Sf._5131	Seifhennersdorf	Carpinus_grandis
Senckenberg Natural History Collections Dresden, Museum of Mineralogy and Geology, Paleobotanical collection	Sf._5137	Seifhennersdorf	Carpinus_grandis
Senckenberg Natural History Collections Dresden, Museum of Mineralogy and Geology, Paleobotanical collection	Sf._5138	Seifhennersdorf	Carpinus_grandis
Senckenberg Natural History Collections Dresden, Museum of Mineralogy and Geology, Paleobotanical collection	Sf._5139	Seifhennersdorf	Carpinus_grandis
Senckenberg Natural History Collections Dresden, Museum of Mineralogy and Geology, Paleobotanical collection	Sf._5140	Seifhennersdorf	Carpinus_grandis
Senckenberg Natural History Collections Dresden, Museum of Mineralogy and Geology, Paleobotanical collection	Sf._5141	Seifhennersdorf	Carpinus_grandis
Senckenberg Natural History Collections Dresden, Museum of Mineralogy and Geology, Paleobotanical collection	Sf._5142	Seifhennersdorf	Carpinus_grandis
Senckenberg Natural History Collections Dresden, Museum of Mineralogy and Geology, Paleobotanical collection	Sf._5143a	Seifhennersdorf	Carpinus_grandis
Senckenberg Natural History Collections Dresden, Museum of Mineralogy and Geology, Paleobotanical collection	Sf._5144a	Seifhennersdorf	Carpinus_grandis
Senckenberg Natural History Collections Dresden, Museum of Mineralogy and Geology, Paleobotanical collection	Sf._5146	Seifhennersdorf	Carpinus_grandis
Senckenberg Natural History Collections Dresden, Museum of Mineralogy and Geology, Paleobotanical collection	Sf._5148	Seifhennersdorf	Carpinus_grandis
Senckenberg Natural History Collections Dresden, Museum of Mineralogy and Geology, Paleobotanical collection	Sf._5149a	Seifhennersdorf	Carpinus_grandis
Senckenberg Natural History Collections Dresden, Museum of Mineralogy and Geology, Paleobotanical collection	Sf._5149b	Seifhennersdorf	Carpinus_grandis
Senckenberg Natural History Collections Dresden, Museum of Mineralogy and Geology, Paleobotanical collection	Sf._5151	Seifhennersdorf	Carpinus_grandis
Senckenberg Natural History Collections Dresden, Museum of Mineralogy and Geology, Paleobotanical collection	Sf._5152	Seifhennersdorf	Carpinus_grandis
Senckenberg Natural History Collections Dresden, Museum of Mineralogy and Geology, Paleobotanical collection	Sf._5155	Seifhennersdorf	Carpinus_grandis
Senckenberg Natural History Collections Dresden, Museum of Mineralogy and Geology, Paleobotanical collection	Sf._5159:1,2	Seifhennersdorf	Carpinus_grandis
Senckenberg Natural History Collections Dresden, Museum of Mineralogy and Geology, Paleobotanical collection	Sf._5161	Seifhennersdorf	Carpinus_grandis
Senckenberg Natural History Collections Dresden, Museum of Mineralogy and Geology, Paleobotanical collection	Sf._5162	Seifhennersdorf	Carpinus_grandis
Senckenberg Natural History Collections Dresden, Museum of Mineralogy and Geology, Paleobotanical collection	Sf._5163	Seifhennersdorf	Carpinus_grandis
Senckenberg Natural History Collections Dresden, Museum of Mineralogy and Geology, Paleobotanical collection	Sf._5164	Seifhennersdorf	Carpinus_grandis
Senckenberg Natural History Collections Dresden, Museum of Mineralogy and Geology, Paleobotanical collection	Sf._5167	Seifhennersdorf	Carpinus_grandis
Senckenberg Natural History Collections Dresden, Museum of Mineralogy and Geology, Paleobotanical collection	Sf._5168	Seifhennersdorf	Carpinus_grandis
Senckenberg Natural History Collections Dresden, Museum of Mineralogy and Geology, Paleobotanical collection	Sf._5171	Seifhennersdorf	Carpinus_grandis
Senckenberg Natural History Collections Dresden, Museum of Mineralogy and Geology, Paleobotanical collection	Sf._5172	Seifhennersdorf	Carpinus_grandis
Senckenberg Natural History Collections Dresden, Museum of Mineralogy and Geology, Paleobotanical collection	Sf._5173	Seifhennersdorf	Carpinus_grandis
Senckenberg Natural History Collections Dresden, Museum of Mineralogy and Geology, Paleobotanical collection	Sf._5174:1:2	Seifhennersdorf	Carpinus_grandis
Senckenberg Natural History Collections Dresden, Museum of Mineralogy and Geology, Paleobotanical collection	Sf._5175	Seifhennersdorf	Carpinus_grandis
Senckenberg Natural History Collections Dresden, Museum of Mineralogy and Geology, Paleobotanical collection	Sf._5176	Seifhennersdorf	Carpinus_grandis
Senckenberg Natural History Collections Dresden, Museum of Mineralogy and Geology, Paleobotanical collection	Sf._5179	Seifhennersdorf	Carpinus_grandis
Senckenberg Natural History Collections Dresden, Museum of Mineralogy and Geology, Paleobotanical collection	Sf._5181	Seifhennersdorf	Carpinus_grandis
Senckenberg Natural History Collections Dresden, Museum of Mineralogy and Geology, Paleobotanical collection	Sf._5183	Seifhennersdorf	Carpinus_grandis
Senckenberg Natural History Collections Dresden, Museum of Mineralogy and Geology, Paleobotanical collection	Sf._5184	Seifhennersdorf	Carpinus_grandis
Senckenberg Natural History Collections Dresden, Museum of Mineralogy and Geology, Paleobotanical collection	Sf._5185	Seifhennersdorf	Carpinus_grandis
Senckenberg Natural History Collections Dresden, Museum of Mineralogy and Geology, Paleobotanical collection	Sf._5186	Seifhennersdorf	Carpinus_grandis
Senckenberg Natural History Collections Dresden, Museum of Mineralogy and Geology, Paleobotanical collection	Sf._5188	Seifhennersdorf	Carpinus_grandis
Senckenberg Natural History Collections Dresden, Museum of Mineralogy and Geology, Paleobotanical collection	Sf._5189	Seifhennersdorf	Carpinus_grandis
Senckenberg Natural History Collections Dresden, Museum of Mineralogy and Geology, Paleobotanical collection	Sf._5193	Seifhennersdorf	Carpinus_grandis
Senckenberg Natural History Collections Dresden, Museum of Mineralogy and Geology, Paleobotanical collection	Sf._5194	Seifhennersdorf	Carpinus_grandis
Senckenberg Natural History Collections Dresden, Museum of Mineralogy and Geology, Paleobotanical collection	Sf._5195	Seifhennersdorf	Carpinus_grandis
Senckenberg Natural History Collections Dresden, Museum of Mineralogy and Geology, Paleobotanical collection	Sf._5197a	Seifhennersdorf	Carpinus_grandis
Senckenberg Natural History Collections Dresden, Museum of Mineralogy and Geology, Paleobotanical collection	Sf._5200	Seifhennersdorf	Carpinus_grandis
Senckenberg Natural History Collections Dresden, Museum of Mineralogy and Geology, Paleobotanical collection	Sf._5203:1,2	Seifhennersdorf	Carpinus_grandis
Senckenberg Natural History Collections Dresden, Museum of Mineralogy and Geology, Paleobotanical collection	Sf._5204	Seifhennersdorf	Carpinus_grandis
Senckenberg Natural History Collections Dresden, Museum of Mineralogy and Geology, Paleobotanical collection	Sf._5205	Seifhennersdorf	Carpinus_grandis
Senckenberg Natural History Collections Dresden, Museum of Mineralogy and Geology, Paleobotanical collection	Sf._5206	Seifhennersdorf	Carpinus_grandis
Senckenberg Natural History Collections Dresden, Museum of Mineralogy and Geology, Paleobotanical collection	Sf._5207	Seifhennersdorf	Carpinus_grandis
Senckenberg Natural History Collections Dresden, Museum of Mineralogy and Geology, Paleobotanical collection	Sf._5208	Seifhennersdorf	Carpinus_grandis
Senckenberg Natural History Collections Dresden, Museum of Mineralogy and Geology, Paleobotanical collection	Sf._5209	Seifhennersdorf	Carpinus_grandis
Senckenberg Natural History Collections Dresden, Museum of Mineralogy and Geology, Paleobotanical collection	Sf._5210:1,2	Seifhennersdorf	Carpinus_grandis
Senckenberg Natural History Collections Dresden, Museum of Mineralogy and Geology, Paleobotanical collection	Sf._5212	Seifhennersdorf	Carpinus_grandis
Senckenberg Natural History Collections Dresden, Museum of Mineralogy and Geology, Paleobotanical collection	Sf._5213	Seifhennersdorf	Carpinus_grandis
Senckenberg Natural History Collections Dresden, Museum of Mineralogy and Geology, Paleobotanical collection	Sf._5214	Seifhennersdorf	Carpinus_grandis
Senckenberg Natural History Collections Dresden, Museum of Mineralogy and Geology, Paleobotanical collection	Sf._5215	Seifhennersdorf	Carpinus_grandis
Senckenberg Natural History Collections Dresden, Museum of Mineralogy and Geology, Paleobotanical collection	Sf._5217:1,2	Seifhennersdorf	Carpinus_grandis
Senckenberg Natural History Collections Dresden, Museum of Mineralogy and Geology, Paleobotanical collection	Sf._5218	Seifhennersdorf	Carpinus_grandis
Senckenberg Natural History Collections Dresden, Museum of Mineralogy and Geology, Paleobotanical collection	Sf._5219	Seifhennersdorf	Carpinus_grandis
Senckenberg Natural History Collections Dresden, Museum of Mineralogy and Geology, Paleobotanical collection	Sf._5222	Seifhennersdorf	Carpinus_grandis
Senckenberg Natural History Collections Dresden, Museum of Mineralogy and Geology, Paleobotanical collection	Sf._5223	Seifhennersdorf	Carpinus_grandis
Senckenberg Natural History Collections Dresden, Museum of Mineralogy and Geology, Paleobotanical collection	Sf._5224	Seifhennersdorf	Carpinus_grandis
Senckenberg Natural History Collections Dresden, Museum of Mineralogy and Geology, Paleobotanical collection	Sf._5226	Seifhennersdorf	Carpinus_grandis
Senckenberg Natural History Collections Dresden, Museum of Mineralogy and Geology, Paleobotanical collection	Sf._5229a	Seifhennersdorf	Carpinus_grandis
Senckenberg Natural History Collections Dresden, Museum of Mineralogy and Geology, Paleobotanical collection	Sf._5232	Seifhennersdorf	Carpinus_grandis
Senckenberg Natural History Collections Dresden, Museum of Mineralogy and Geology, Paleobotanical collection	Sf._5234	Seifhennersdorf	Carpinus_grandis
Senckenberg Natural History Collections Dresden, Museum of Mineralogy and Geology, Paleobotanical collection	Sf._5235	Seifhennersdorf	Carpinus_grandis
Senckenberg Natural History Collections Dresden, Museum of Mineralogy and Geology, Paleobotanical collection	Sf._5236	Seifhennersdorf	Carpinus_grandis
Senckenberg Natural History Collections Dresden, Museum of Mineralogy and Geology, Paleobotanical collection	Sf._5237	Seifhennersdorf	Carpinus_grandis
Senckenberg Natural History Collections Dresden, Museum of Mineralogy and Geology, Paleobotanical collection	Sf._5239	Seifhennersdorf	Carpinus_grandis
Senckenberg Natural History Collections Dresden, Museum of Mineralogy and Geology, Paleobotanical collection	Sf._5240	Seifhennersdorf	Carpinus_grandis
Senckenberg Natural History Collections Dresden, Museum of Mineralogy and Geology, Paleobotanical collection	Sf._5241:1,2	Seifhennersdorf	Carpinus_grandis
Senckenberg Natural History Collections Dresden, Museum of Mineralogy and Geology, Paleobotanical collection	Sf._5242	Seifhennersdorf	Carpinus_grandis
Senckenberg Natural History Collections Dresden, Museum of Mineralogy and Geology, Paleobotanical collection	Sf._5243	Seifhennersdorf	Carpinus_grandis
Senckenberg Natural History Collections Dresden, Museum of Mineralogy and Geology, Paleobotanical collection	Sf._5244	Seifhennersdorf	Carpinus_grandis
Senckenberg Natural History Collections Dresden, Museum of Mineralogy and Geology, Paleobotanical collection	Sf._5246	Seifhennersdorf	Carpinus_grandis
Senckenberg Natural History Collections Dresden, Museum of Mineralogy and Geology, Paleobotanical collection	Sf._5247	Seifhennersdorf	Carpinus_grandis
Senckenberg Natural History Collections Dresden, Museum of Mineralogy and Geology, Paleobotanical collection	Sf._5248	Seifhennersdorf	Carpinus_grandis
Senckenberg Natural History Collections Dresden, Museum of Mineralogy and Geology, Paleobotanical collection	Sf._5249	Seifhennersdorf	Carpinus_grandis
Senckenberg Natural History Collections Dresden, Museum of Mineralogy and Geology, Paleobotanical collection	Sf._5250:1,2	Seifhennersdorf	Carpinus_grandis
Senckenberg Natural History Collections Dresden, Museum of Mineralogy and Geology, Paleobotanical collection	Sf._5251	Seifhennersdorf	Carpinus_grandis
Senckenberg Natural History Collections Dresden, Museum of Mineralogy and Geology, Paleobotanical collection	Sf._5253	Seifhennersdorf	Carpinus_grandis
Senckenberg Natural History Collections Dresden, Museum of Mineralogy and Geology, Paleobotanical collection	Sf._5254	Seifhennersdorf	Carpinus_grandis
Senckenberg Natural History Collections Dresden, Museum of Mineralogy and Geology, Paleobotanical collection	Sf._5255	Seifhennersdorf	Carpinus_grandis
Senckenberg Natural History Collections Dresden, Museum of Mineralogy and Geology, Paleobotanical collection	Sf._5258	Seifhennersdorf	Carpinus_grandis
Senckenberg Natural History Collections Dresden, Museum of Mineralogy and Geology, Paleobotanical collection	Sf._5259	Seifhennersdorf	Carpinus_grandis
Senckenberg Natural History Collections Dresden, Museum of Mineralogy and Geology, Paleobotanical collection	Sf._5260	Seifhennersdorf	Carpinus_grandis
Senckenberg Natural History Collections Dresden, Museum of Mineralogy and Geology, Paleobotanical collection	Sf._5261:1,2	Seifhennersdorf	Carpinus_grandis
Senckenberg Natural History Collections Dresden, Museum of Mineralogy and Geology, Paleobotanical collection	Sf._5262:1,2	Seifhennersdorf	Carpinus_grandis
Senckenberg Natural History Collections Dresden, Museum of Mineralogy and Geology, Paleobotanical collection	Sf._5264	Seifhennersdorf	Carpinus_grandis
Senckenberg Natural History Collections Dresden, Museum of Mineralogy and Geology, Paleobotanical collection	Sf._5265	Seifhennersdorf	Carpinus_grandis
Senckenberg Natural History Collections Dresden, Museum of Mineralogy and Geology, Paleobotanical collection	Sf._5266	Seifhennersdorf	Carpinus_grandis
Senckenberg Natural History Collections Dresden, Museum of Mineralogy and Geology, Paleobotanical collection	Sf._5267	Seifhennersdorf	Carpinus_grandis
Senckenberg Natural History Collections Dresden, Museum of Mineralogy and Geology, Paleobotanical collection	Sf._5268	Seifhennersdorf	Carpinus_grandis
Senckenberg Natural History Collections Dresden, Museum of Mineralogy and Geology, Paleobotanical collection	Sf._5269	Seifhennersdorf	Carpinus_grandis
Senckenberg Natural History Collections Dresden, Museum of Mineralogy and Geology, Paleobotanical collection	Sf._5270	Seifhennersdorf	Carpinus_grandis
Senckenberg Natural History Collections Dresden, Museum of Mineralogy and Geology, Paleobotanical collection	Sf._5271	Seifhennersdorf	Carpinus_grandis
Senckenberg Natural History Collections Dresden, Museum of Mineralogy and Geology, Paleobotanical collection	Sf._5272:1,2	Seifhennersdorf	Carpinus_grandis
Senckenberg Natural History Collections Dresden, Museum of Mineralogy and Geology, Paleobotanical collection	Sf._5273	Seifhennersdorf	Carpinus_grandis
Senckenberg Natural History Collections Dresden, Museum of Mineralogy and Geology, Paleobotanical collection	Sf._5274	Seifhennersdorf	Carpinus_grandis
Senckenberg Natural History Collections Dresden, Museum of Mineralogy and Geology, Paleobotanical collection	Sf._5275	Seifhennersdorf	Carpinus_grandis
Senckenberg Natural History Collections Dresden, Museum of Mineralogy and Geology, Paleobotanical collection	Sf._5277	Seifhennersdorf	Carpinus_grandis
Senckenberg Natural History Collections Dresden, Museum of Mineralogy and Geology, Paleobotanical collection	Sf._5278	Seifhennersdorf	Carpinus_grandis
Senckenberg Natural History Collections Dresden, Museum of Mineralogy and Geology, Paleobotanical collection	Sf._5279	Seifhennersdorf	Carpinus_grandis
Senckenberg Natural History Collections Dresden, Museum of Mineralogy and Geology, Paleobotanical collection	Sf._5280	Seifhennersdorf	Carpinus_grandis
Senckenberg Natural History Collections Dresden, Museum of Mineralogy and Geology, Paleobotanical collection	Sf._5284	Seifhennersdorf	Carpinus_grandis
Senckenberg Natural History Collections Dresden, Museum of Mineralogy and Geology, Paleobotanical collection	Sf._5285	Seifhennersdorf	Carpinus_grandis
Senckenberg Natural History Collections Dresden, Museum of Mineralogy and Geology, Paleobotanical collection	Sf._5286/5283	Seifhennersdorf	Carpinus_grandis
Senckenberg Natural History Collections Dresden, Museum of Mineralogy and Geology, Paleobotanical collection	Sf._5287	Seifhennersdorf	Carpinus_grandis
Senckenberg Natural History Collections Dresden, Museum of Mineralogy and Geology, Paleobotanical collection	Sf._5288	Seifhennersdorf	Carpinus_grandis
Senckenberg Natural History Collections Dresden, Museum of Mineralogy and Geology, Paleobotanical collection	Sf._5289	Seifhennersdorf	Carpinus_grandis
Senckenberg Natural History Collections Dresden, Museum of Mineralogy and Geology, Paleobotanical collection	Sf._5290	Seifhennersdorf	Carpinus_grandis
Senckenberg Natural History Collections Dresden, Museum of Mineralogy and Geology, Paleobotanical collection	Sf._5291	Seifhennersdorf	Carpinus_grandis
Senckenberg Natural History Collections Dresden, Museum of Mineralogy and Geology, Paleobotanical collection	Sf._5292	Seifhennersdorf	Carpinus_grandis
Senckenberg Natural History Collections Dresden, Museum of Mineralogy and Geology, Paleobotanical collection	Sf._5293	Seifhennersdorf	Carpinus_grandis
Senckenberg Natural History Collections Dresden, Museum of Mineralogy and Geology, Paleobotanical collection	Sf._5296	Seifhennersdorf	Carpinus_grandis
Senckenberg Natural History Collections Dresden, Museum of Mineralogy and Geology, Paleobotanical collection	Sf._5297	Seifhennersdorf	Carpinus_grandis
Senckenberg Natural History Collections Dresden, Museum of Mineralogy and Geology, Paleobotanical collection	Sf._5298:1,2 a1	Seifhennersdorf	Carpinus_grandis
Senckenberg Natural History Collections Dresden, Museum of Mineralogy and Geology, Paleobotanical collection	Sf._5298:1,2 a2	Seifhennersdorf	Carpinus_grandis
Senckenberg Natural History Collections Dresden, Museum of Mineralogy and Geology, Paleobotanical collection	Sf._5299	Seifhennersdorf	Carpinus_grandis
Senckenberg Natural History Collections Dresden, Museum of Mineralogy and Geology, Paleobotanical collection	Sf._5300	Seifhennersdorf	Carpinus_grandis
Senckenberg Natural History Collections Dresden, Museum of Mineralogy and Geology, Paleobotanical collection	Sf._5301	Seifhennersdorf	Carpinus_grandis
Senckenberg Natural History Collections Dresden, Museum of Mineralogy and Geology, Paleobotanical collection	Sf._5302	Seifhennersdorf	Carpinus_grandis
Senckenberg Natural History Collections Dresden, Museum of Mineralogy and Geology, Paleobotanical collection	Sf._5304	Seifhennersdorf	Carpinus_grandis
Senckenberg Natural History Collections Dresden, Museum of Mineralogy and Geology, Paleobotanical collection	Sf._5306	Seifhennersdorf	Carpinus_grandis
Senckenberg Natural History Collections Dresden, Museum of Mineralogy and Geology, Paleobotanical collection	Sf._5307	Seifhennersdorf	Carpinus_grandis
Senckenberg Natural History Collections Dresden, Museum of Mineralogy and Geology, Paleobotanical collection	Sf._5308	Seifhennersdorf	Carpinus_grandis
Senckenberg Natural History Collections Dresden, Museum of Mineralogy and Geology, Paleobotanical collection	Sf._5309	Seifhennersdorf	Carpinus_grandis
Senckenberg Natural History Collections Dresden, Museum of Mineralogy and Geology, Paleobotanical collection	Sf._5310	Seifhennersdorf	Carpinus_grandis
Senckenberg Natural History Collections Dresden, Museum of Mineralogy and Geology, Paleobotanical collection	Sf._5311	Seifhennersdorf	Carpinus_grandis
Senckenberg Natural History Collections Dresden, Museum of Mineralogy and Geology, Paleobotanical collection	Sf._5312	Seifhennersdorf	Carpinus_grandis
Senckenberg Natural History Collections Dresden, Museum of Mineralogy and Geology, Paleobotanical collection	Sf._5313	Seifhennersdorf	Carpinus_grandis
Senckenberg Natural History Collections Dresden, Museum of Mineralogy and Geology, Paleobotanical collection	Sf._5314	Seifhennersdorf	Carpinus_grandis
Senckenberg Natural History Collections Dresden, Museum of Mineralogy and Geology, Paleobotanical collection	Sf._5315	Seifhennersdorf	Carpinus_grandis
Senckenberg Natural History Collections Dresden, Museum of Mineralogy and Geology, Paleobotanical collection	Sf._5322b	Seifhennersdorf	Carpinus_grandis
Senckenberg Natural History Collections Dresden, Museum of Mineralogy and Geology, Paleobotanical collection	Sf._5325b	Seifhennersdorf	Carpinus_grandis
Senckenberg Natural History Collections Dresden, Museum of Mineralogy and Geology, Paleobotanical collection	Sf._5350a	Seifhennersdorf	Carpinus_grandis
Senckenberg Natural History Collections Dresden, Museum of Mineralogy and Geology, Paleobotanical collection	Sf._5397	Seifhennersdorf	Carpinus_grandis
Senckenberg Natural History Collections Dresden, Museum of Mineralogy and Geology, Paleobotanical collection	Sf._5447	Seifhennersdorf	Carpinus_grandis
Senckenberg Natural History Collections Dresden, Museum of Mineralogy and Geology, Paleobotanical collection	Sf._5489a	Seifhennersdorf	Carpinus_grandis
Senckenberg Natural History Collections Dresden, Museum of Mineralogy and Geology, Paleobotanical collection	Sf._5500	Seifhennersdorf	Carpinus_grandis
Senckenberg Natural History Collections Dresden, Museum of Mineralogy and Geology, Paleobotanical collection	Sf._5574	Seifhennersdorf	Carpinus_grandis
Senckenberg Natural History Collections Dresden, Museum of Mineralogy and Geology, Paleobotanical collection	Sf._5642b	Seifhennersdorf	Carpinus_grandis
Senckenberg Natural History Collections Dresden, Museum of Mineralogy and Geology, Paleobotanical collection	Sf._5646b	Seifhennersdorf	Carpinus_grandis
Senckenberg Natural History Collections Dresden, Museum of Mineralogy and Geology, Paleobotanical collection	Sf._5647	Seifhennersdorf	Carpinus_grandis
Senckenberg Natural History Collections Dresden, Museum of Mineralogy and Geology, Paleobotanical collection	Sf._5662	Seifhennersdorf	Carpinus_grandis
Senckenberg Natural History Collections Dresden, Museum of Mineralogy and Geology, Paleobotanical collection	Sf._5689	Seifhennersdorf	Carpinus_grandis
Senckenberg Natural History Collections Dresden, Museum of Mineralogy and Geology, Paleobotanical collection	Sf._5766a	Seifhennersdorf	Carpinus_grandis
Senckenberg Natural History Collections Dresden, Museum of Mineralogy and Geology, Paleobotanical collection	Sf._5799a	Seifhennersdorf	Carpinus_grandis
Senckenberg Natural History Collections Dresden, Museum of Mineralogy and Geology, Paleobotanical collection	Sf._5806a	Seifhennersdorf	Carpinus_grandis
Senckenberg Natural History Collections Dresden, Museum of Mineralogy and Geology, Paleobotanical collection	Sf._5807a	Seifhennersdorf	Carpinus_grandis
Senckenberg Natural History Collections Dresden, Museum of Mineralogy and Geology, Paleobotanical collection	Sf._5818a:1,2	Seifhennersdorf	Carpinus_grandis
Senckenberg Natural History Collections Dresden, Museum of Mineralogy and Geology, Paleobotanical collection	Sf._6089b	Seifhennersdorf	Carpinus_grandis
Senckenberg Natural History Collections Dresden, Museum of Mineralogy and Geology, Paleobotanical collection	Sf._6116b	Seifhennersdorf	Carpinus_grandis
Senckenberg Natural History Collections Dresden, Museum of Mineralogy and Geology, Paleobotanical collection	Sf._6118b	Seifhennersdorf	Carpinus_grandis
Senckenberg Natural History Collections Dresden, Museum of Mineralogy and Geology, Paleobotanical collection	Sf._6520b	Seifhennersdorf	Carpinus_grandis
Senckenberg Natural History Collections Dresden, Museum of Mineralogy and Geology, Paleobotanical collection	Sf._6641	Seifhennersdorf	Carpinus_grandis
Senckenberg Natural History Collections Dresden, Museum of Mineralogy and Geology, Paleobotanical collection	Sf._7206 b	Seifhennersdorf	Carpinus_grandis
Senckenberg Natural History Collections Dresden, Museum of Mineralogy and Geology, Paleobotanical collection	Sf._7239	Seifhennersdorf	Carpinus_grandis
Senckenberg Natural History Collections Dresden, Museum of Mineralogy and Geology, Paleobotanical collection	Sf._7241	Seifhennersdorf	Carpinus_grandis
Senckenberg Natural History Collections Dresden, Museum of Mineralogy and Geology, Paleobotanical collection	Sf._7267a	Seifhennersdorf	Carpinus_grandis
Senckenberg Natural History Collections Dresden, Museum of Mineralogy and Geology, Paleobotanical collection	Sf._7732:1	Seifhennersdorf	Carpinus_grandis
Senckenberg Natural History Collections Dresden, Museum of Mineralogy and Geology, Paleobotanical collection	Sf._7831:1,2	Seifhennersdorf	Carpinus_grandis
Senckenberg Natural History Collections Dresden, Museum of Mineralogy and Geology, Paleobotanical collection	Sf._7843	Seifhennersdorf	Carpinus_grandis
Senckenberg Natural History Collections Dresden, Museum of Mineralogy and Geology, Paleobotanical collection	Sf._7844	Seifhennersdorf	Carpinus_grandis
Senckenberg Natural History Collections Dresden, Museum of Mineralogy and Geology, Paleobotanical collection	Sf._7846	Seifhennersdorf	Carpinus_grandis
Senckenberg Natural History Collections Dresden, Museum of Mineralogy and Geology, Paleobotanical collection	Sf._7847	Seifhennersdorf	Carpinus_grandis
Senckenberg Natural History Collections Dresden, Museum of Mineralogy and Geology, Paleobotanical collection	Sf._7878	Seifhennersdorf	Carpinus_grandis
Senckenberg Natural History Collections Dresden, Museum of Mineralogy and Geology, Paleobotanical collection	Sf._7890	Seifhennersdorf	Carpinus_grandis
Senckenberg Natural History Collections Dresden, Museum of Mineralogy and Geology, Paleobotanical collection	Sf._7891	Seifhennersdorf	Carpinus_grandis
Senckenberg Natural History Collections Dresden, Museum of Mineralogy and Geology, Paleobotanical collection	Sf._7892	Seifhennersdorf	Carpinus_grandis
Senckenberg Natural History Collections Dresden, Museum of Mineralogy and Geology, Paleobotanical collection	Sf._7902	Seifhennersdorf	Carpinus_grandis
Senckenberg Natural History Collections Dresden, Museum of Mineralogy and Geology, Paleobotanical collection	Sf._7920	Seifhennersdorf	Carpinus_grandis
Senckenberg Natural History Collections Dresden, Museum of Mineralogy and Geology, Paleobotanical collection	Sf._7935a	Seifhennersdorf	Carpinus_grandis
Senckenberg Natural History Collections Dresden, Museum of Mineralogy and Geology, Paleobotanical collection	Sf._7935b	Seifhennersdorf	Carpinus_grandis
Senckenberg Natural History Collections Dresden, Museum of Mineralogy and Geology, Paleobotanical collection	Sf._7971	Seifhennersdorf	Carpinus_grandis
Senckenberg Natural History Collections Dresden, Museum of Mineralogy and Geology, Paleobotanical collection	Sf._7972	Seifhennersdorf	Carpinus_grandis
Senckenberg Natural History Collections Dresden, Museum of Mineralogy and Geology, Paleobotanical collection	Sf._7973	Seifhennersdorf	Carpinus_grandis
Senckenberg Natural History Collections Dresden, Museum of Mineralogy and Geology, Paleobotanical collection	Sf._7974	Seifhennersdorf	Carpinus_grandis
Senckenberg Natural History Collections Dresden, Museum of Mineralogy and Geology, Paleobotanical collection	Sf._7975	Seifhennersdorf	Carpinus_grandis
Senckenberg Natural History Collections Dresden, Museum of Mineralogy and Geology, Paleobotanical collection	Sf._8100	Seifhennersdorf	Carpinus_grandis
Senckenberg Natural History Collections Dresden, Museum of Mineralogy and Geology, Paleobotanical collection	Sf._8101	Seifhennersdorf	Carpinus_grandis
Senckenberg Natural History Collections Dresden, Museum of Mineralogy and Geology, Paleobotanical collection	Sf._8109	Seifhennersdorf	Carpinus_grandis
Senckenberg Natural History Collections Dresden, Museum of Mineralogy and Geology, Paleobotanical collection	Sf._8110	Seifhennersdorf	Carpinus_grandis
Senckenberg Natural History Collections Dresden, Museum of Mineralogy and Geology, Paleobotanical collection	Sf._8112	Seifhennersdorf	Carpinus_grandis
Senckenberg Natural History Collections Dresden, Museum of Mineralogy and Geology, Paleobotanical collection	Sf._8113	Seifhennersdorf	Carpinus_grandis
Senckenberg Natural History Collections Dresden, Museum of Mineralogy and Geology, Paleobotanical collection	Sf._8114	Seifhennersdorf	Carpinus_grandis
Senckenberg Natural History Collections Dresden, Museum of Mineralogy and Geology, Paleobotanical collection	Sf._8122	Seifhennersdorf	Carpinus_grandis
Senckenberg Natural History Collections Dresden, Museum of Mineralogy and Geology, Paleobotanical collection	Sf._8127	Seifhennersdorf	Carpinus_grandis
Senckenberg Natural History Collections Dresden, Museum of Mineralogy and Geology, Paleobotanical collection	Sf._8152	Seifhennersdorf	Carpinus_grandis
Senckenberg Natural History Collections Dresden, Museum of Mineralogy and Geology, Paleobotanical collection	Sf._8153:1,2	Seifhennersdorf	Carpinus_grandis
Senckenberg Natural History Collections Dresden, Museum of Mineralogy and Geology, Paleobotanical collection	Sf._8160:1,2	Seifhennersdorf	Carpinus_grandis
Senckenberg Natural History Collections Dresden, Museum of Mineralogy and Geology, Paleobotanical collection	Sf._8182	Seifhennersdorf	Carpinus_grandis
Senckenberg Natural History Collections Dresden, Museum of Mineralogy and Geology, Paleobotanical collection	Sf._8193	Seifhennersdorf	Carpinus_grandis
Senckenberg Natural History Collections Dresden, Museum of Mineralogy and Geology, Paleobotanical collection	Sf._8265:1,2	Seifhennersdorf	Carpinus_grandis
Senckenberg Natural History Collections Dresden, Museum of Mineralogy and Geology, Paleobotanical collection	Sf._8266a	Seifhennersdorf	Carpinus_grandis
Senckenberg Natural History Collections Dresden, Museum of Mineralogy and Geology, Paleobotanical collection	Sf._8266b	Seifhennersdorf	Carpinus_grandis
Senckenberg Natural History Collections Dresden, Museum of Mineralogy and Geology, Paleobotanical collection	Sf._8296	Seifhennersdorf	Carpinus_grandis
Senckenberg Natural History Collections Dresden, Museum of Mineralogy and Geology, Paleobotanical collection	Sf._8300	Seifhennersdorf	Carpinus_grandis
Senckenberg Natural History Collections Dresden, Museum of Mineralogy and Geology, Paleobotanical collection	Sf._8301	Seifhennersdorf	Carpinus_grandis
Senckenberg Natural History Collections Dresden, Museum of Mineralogy and Geology, Paleobotanical collection	Sf._8302	Seifhennersdorf	Carpinus_grandis
Senckenberg Natural History Collections Dresden, Museum of Mineralogy and Geology, Paleobotanical collection	Sf._8305	Seifhennersdorf	Carpinus_grandis
Senckenberg Natural History Collections Dresden, Museum of Mineralogy and Geology, Paleobotanical collection	Sf._8412	Seifhennersdorf	Carpinus_grandis
Senckenberg Natural History Collections Dresden, Museum of Mineralogy and Geology, Paleobotanical collection	Sf._8434	Seifhennersdorf	Carpinus_grandis
Senckenberg Natural History Collections Dresden, Museum of Mineralogy and Geology, Paleobotanical collection	Sf._8447/4375a	Seifhennersdorf	Carpinus_grandis
Senckenberg Natural History Collections Dresden, Museum of Mineralogy and Geology, Paleobotanical collection	Sf._8458	Seifhennersdorf	Carpinus_grandis
Senckenberg Natural History Collections Dresden, Museum of Mineralogy and Geology, Paleobotanical collection	Sf._8460	Seifhennersdorf	Carpinus_grandis
Senckenberg Natural History Collections Dresden, Museum of Mineralogy and Geology, Paleobotanical collection	Sf._8463:1,2	Seifhennersdorf	Carpinus_grandis
Senckenberg Natural History Collections Dresden, Museum of Mineralogy and Geology, Paleobotanical collection	Sf._8465:1,2	Seifhennersdorf	Carpinus_grandis
Senckenberg Natural History Collections Dresden, Museum of Mineralogy and Geology, Paleobotanical collection	Sf._8468:1,2	Seifhennersdorf	Carpinus_grandis
Senckenberg Natural History Collections Dresden, Museum of Mineralogy and Geology, Paleobotanical collection	Sf._8472	Seifhennersdorf	Carpinus_grandis
Senckenberg Natural History Collections Dresden, Museum of Mineralogy and Geology, Paleobotanical collection	Sf._8475	Seifhennersdorf	Carpinus_grandis
Senckenberg Natural History Collections Dresden, Museum of Mineralogy and Geology, Paleobotanical collection	Sf._8476	Seifhennersdorf	Carpinus_grandis
Senckenberg Natural History Collections Dresden, Museum of Mineralogy and Geology, Paleobotanical collection	Sf._8477	Seifhennersdorf	Carpinus_grandis
Senckenberg Natural History Collections Dresden, Museum of Mineralogy and Geology, Paleobotanical collection	Sf._8489:1,2	Seifhennersdorf	Carpinus_grandis
Senckenberg Natural History Collections Dresden, Museum of Mineralogy and Geology, Paleobotanical collection	Sf._8497	Seifhennersdorf	Carpinus_grandis
Senckenberg Natural History Collections Dresden, Museum of Mineralogy and Geology, Paleobotanical collection	Sf._8498	Seifhennersdorf	Carpinus_grandis
Senckenberg Natural History Collections Dresden, Museum of Mineralogy and Geology, Paleobotanical collection	Sf._8500	Seifhennersdorf	Carpinus_grandis
Senckenberg Natural History Collections Dresden, Museum of Mineralogy and Geology, Paleobotanical collection	Sf._8501	Seifhennersdorf	Carpinus_grandis
Senckenberg Natural History Collections Dresden, Museum of Mineralogy and Geology, Paleobotanical collection	Sf._8503	Seifhennersdorf	Carpinus_grandis
Senckenberg Natural History Collections Dresden, Museum of Mineralogy and Geology, Paleobotanical collection	Sf._8504:1,2	Seifhennersdorf	Carpinus_grandis
Senckenberg Natural History Collections Dresden, Museum of Mineralogy and Geology, Paleobotanical collection	Sf._8505	Seifhennersdorf	Carpinus_grandis
Senckenberg Natural History Collections Dresden, Museum of Mineralogy and Geology, Paleobotanical collection	Sf._8508 (II)	Seifhennersdorf	Carpinus_grandis
Senckenberg Natural History Collections Dresden, Museum of Mineralogy and Geology, Paleobotanical collection	Sf._8508 (II)	Seifhennersdorf	Carpinus_grandis
Senckenberg Natural History Collections Dresden, Museum of Mineralogy and Geology, Paleobotanical collection	Sf._8509:1,2	Seifhennersdorf	Carpinus_grandis
Senckenberg Natural History Collections Dresden, Museum of Mineralogy and Geology, Paleobotanical collection	Sf._8510	Seifhennersdorf	Carpinus_grandis
Senckenberg Natural History Collections Dresden, Museum of Mineralogy and Geology, Paleobotanical collection	Sf._8512	Seifhennersdorf	Carpinus_grandis
Senckenberg Natural History Collections Dresden, Museum of Mineralogy and Geology, Paleobotanical collection	Sf._8514	Seifhennersdorf	Carpinus_grandis
Senckenberg Natural History Collections Dresden, Museum of Mineralogy and Geology, Paleobotanical collection	Sf._8515	Seifhennersdorf	Carpinus_grandis
Senckenberg Natural History Collections Dresden, Museum of Mineralogy and Geology, Paleobotanical collection	Sf._8516:1,2	Seifhennersdorf	Carpinus_grandis
Senckenberg Natural History Collections Dresden, Museum of Mineralogy and Geology, Paleobotanical collection	Sf._8517	Seifhennersdorf	Carpinus_grandis
Senckenberg Natural History Collections Dresden, Museum of Mineralogy and Geology, Paleobotanical collection	Sf._8520	Seifhennersdorf	Carpinus_grandis
Senckenberg Natural History Collections Dresden, Museum of Mineralogy and Geology, Paleobotanical collection	Sf._8524	Seifhennersdorf	Carpinus_grandis
Senckenberg Natural History Collections Dresden, Museum of Mineralogy and Geology, Paleobotanical collection	Sf._8526	Seifhennersdorf	Carpinus_grandis
Senckenberg Natural History Collections Dresden, Museum of Mineralogy and Geology, Paleobotanical collection	Sf._8527	Seifhennersdorf	Carpinus_grandis
Senckenberg Natural History Collections Dresden, Museum of Mineralogy and Geology, Paleobotanical collection	Sf._8528	Seifhennersdorf	Carpinus_grandis
Senckenberg Natural History Collections Dresden, Museum of Mineralogy and Geology, Paleobotanical collection	Sf._8529:1,2	Seifhennersdorf	Carpinus_grandis
Senckenberg Natural History Collections Dresden, Museum of Mineralogy and Geology, Paleobotanical collection	Sf._8533	Seifhennersdorf	Carpinus_grandis
Senckenberg Natural History Collections Dresden, Museum of Mineralogy and Geology, Paleobotanical collection	Sf._8534	Seifhennersdorf	Carpinus_grandis
Senckenberg Natural History Collections Dresden, Museum of Mineralogy and Geology, Paleobotanical collection	Sf._8536	Seifhennersdorf	Carpinus_grandis
Senckenberg Natural History Collections Dresden, Museum of Mineralogy and Geology, Paleobotanical collection	Sf._8537	Seifhennersdorf	Carpinus_grandis
Senckenberg Natural History Collections Dresden, Museum of Mineralogy and Geology, Paleobotanical collection	Sf._8538a	Seifhennersdorf	Carpinus_grandis
Senckenberg Natural History Collections Dresden, Museum of Mineralogy and Geology, Paleobotanical collection	Sf._8538b	Seifhennersdorf	Carpinus_grandis
Senckenberg Natural History Collections Dresden, Museum of Mineralogy and Geology, Paleobotanical collection	Sf._8539	Seifhennersdorf	Carpinus_grandis
Senckenberg Natural History Collections Dresden, Museum of Mineralogy and Geology, Paleobotanical collection	Sf._8541	Seifhennersdorf	Carpinus_grandis
Senckenberg Natural History Collections Dresden, Museum of Mineralogy and Geology, Paleobotanical collection	Sf._8542	Seifhennersdorf	Carpinus_grandis
Senckenberg Natural History Collections Dresden, Museum of Mineralogy and Geology, Paleobotanical collection	Sf._8564	Seifhennersdorf	Carpinus_grandis
Senckenberg Natural History Collections Dresden, Museum of Mineralogy and Geology, Paleobotanical collection	Sf._8566	Seifhennersdorf	Carpinus_grandis
Senckenberg Natural History Collections Dresden, Museum of Mineralogy and Geology, Paleobotanical collection	Sf._8567	Seifhennersdorf	Carpinus_grandis
Senckenberg Natural History Collections Dresden, Museum of Mineralogy and Geology, Paleobotanical collection	Sf._8568	Seifhennersdorf	Carpinus_grandis
Senckenberg Natural History Collections Dresden, Museum of Mineralogy and Geology, Paleobotanical collection	Sf._8569	Seifhennersdorf	Carpinus_grandis
Senckenberg Natural History Collections Dresden, Museum of Mineralogy and Geology, Paleobotanical collection	Sf._8571	Seifhennersdorf	Carpinus_grandis
Senckenberg Natural History Collections Dresden, Museum of Mineralogy and Geology, Paleobotanical collection	Sf._8572	Seifhennersdorf	Carpinus_grandis
Senckenberg Natural History Collections Dresden, Museum of Mineralogy and Geology, Paleobotanical collection	Sf._8588	Seifhennersdorf	Carpinus_grandis
Senckenberg Natural History Collections Dresden, Museum of Mineralogy and Geology, Paleobotanical collection	Sf._8589	Seifhennersdorf	Carpinus_grandis
Senckenberg Natural History Collections Dresden, Museum of Mineralogy and Geology, Paleobotanical collection	Sf._8590	Seifhennersdorf	Carpinus_grandis
Senckenberg Natural History Collections Dresden, Museum of Mineralogy and Geology, Paleobotanical collection	Sf._8595	Seifhennersdorf	Carpinus_grandis
Senckenberg Natural History Collections Dresden, Museum of Mineralogy and Geology, Paleobotanical collection	Sf._8602b	Seifhennersdorf	Carpinus_grandis
Senckenberg Natural History Collections Dresden, Museum of Mineralogy and Geology, Paleobotanical collection	Sf._8630	Seifhennersdorf	Carpinus_grandis
Senckenberg Natural History Collections Dresden, Museum of Mineralogy and Geology, Paleobotanical collection	Sf._8638	Seifhennersdorf	Carpinus_grandis
Senckenberg Natural History Collections Dresden, Museum of Mineralogy and Geology, Paleobotanical collection	Sf._8672 a	Seifhennersdorf	Carpinus_grandis
Senckenberg Natural History Collections Dresden, Museum of Mineralogy and Geology, Paleobotanical collection	Sf._8684	Seifhennersdorf	Carpinus_grandis
Senckenberg Natural History Collections Dresden, Museum of Mineralogy and Geology, Paleobotanical collection	Sf._8685	Seifhennersdorf	Carpinus_grandis
Senckenberg Natural History Collections Dresden, Museum of Mineralogy and Geology, Paleobotanical collection	Sf._8686	Seifhennersdorf	Carpinus_grandis
Senckenberg Natural History Collections Dresden, Museum of Mineralogy and Geology, Paleobotanical collection	Sf._8687	Seifhennersdorf	Carpinus_grandis
Senckenberg Natural History Collections Dresden, Museum of Mineralogy and Geology, Paleobotanical collection	Sf._8689	Seifhennersdorf	Carpinus_grandis
Senckenberg Natural History Collections Dresden, Museum of Mineralogy and Geology, Paleobotanical collection	Sf._4b	Seifhennersdorf	Carpinus_roscheri
Senckenberg Natural History Collections Dresden, Museum of Mineralogy and Geology, Paleobotanical collection	Sf._849	Seifhennersdorf	Carpinus_roscheri
Senckenberg Natural History Collections Dresden, Museum of Mineralogy and Geology, Paleobotanical collection	Sf._1169b	Seifhennersdorf	Carpinus_roscheri
Senckenberg Natural History Collections Dresden, Museum of Mineralogy and Geology, Paleobotanical collection	Sf._1360:1,2	Seifhennersdorf	Carpinus_roscheri
Senckenberg Natural History Collections Dresden, Museum of Mineralogy and Geology, Paleobotanical collection	Sf._1363	Seifhennersdorf	Carpinus_roscheri
Senckenberg Natural History Collections Dresden, Museum of Mineralogy and Geology, Paleobotanical collection	Sf._1364	Seifhennersdorf	Carpinus_roscheri
Senckenberg Natural History Collections Dresden, Museum of Mineralogy and Geology, Paleobotanical collection	Sf._1365	Seifhennersdorf	Carpinus_roscheri
Senckenberg Natural History Collections Dresden, Museum of Mineralogy and Geology, Paleobotanical collection	Sf._1367	Seifhennersdorf	Carpinus_roscheri
Senckenberg Natural History Collections Dresden, Museum of Mineralogy and Geology, Paleobotanical collection	Sf._1377	Seifhennersdorf	Carpinus_roscheri
Senckenberg Natural History Collections Dresden, Museum of Mineralogy and Geology, Paleobotanical collection	Sf._1379	Seifhennersdorf	Carpinus_roscheri
Senckenberg Natural History Collections Dresden, Museum of Mineralogy and Geology, Paleobotanical collection	Sf._1506:1,2	Seifhennersdorf	Carpinus_roscheri
Senckenberg Natural History Collections Dresden, Museum of Mineralogy and Geology, Paleobotanical collection	Sf._1511	Seifhennersdorf	Carpinus_roscheri
Senckenberg Natural History Collections Dresden, Museum of Mineralogy and Geology, Paleobotanical collection	Sf._1538	Seifhennersdorf	Carpinus_roscheri
Senckenberg Natural History Collections Dresden, Museum of Mineralogy and Geology, Paleobotanical collection	Sf._1540	Seifhennersdorf	Carpinus_roscheri
Senckenberg Natural History Collections Dresden, Museum of Mineralogy and Geology, Paleobotanical collection	Sf._1542	Seifhennersdorf	Carpinus_roscheri
Senckenberg Natural History Collections Dresden, Museum of Mineralogy and Geology, Paleobotanical collection	Sf._1543	Seifhennersdorf	Carpinus_roscheri
Senckenberg Natural History Collections Dresden, Museum of Mineralogy and Geology, Paleobotanical collection	Sf._1551	Seifhennersdorf	Carpinus_roscheri
Senckenberg Natural History Collections Dresden, Museum of Mineralogy and Geology, Paleobotanical collection	Sf._1554	Seifhennersdorf	Carpinus_roscheri
Senckenberg Natural History Collections Dresden, Museum of Mineralogy and Geology, Paleobotanical collection	Sf._1574	Seifhennersdorf	Carpinus_roscheri
Senckenberg Natural History Collections Dresden, Museum of Mineralogy and Geology, Paleobotanical collection	Sf._1586 (II)	Seifhennersdorf	Carpinus_roscheri
Senckenberg Natural History Collections Dresden, Museum of Mineralogy and Geology, Paleobotanical collection	Sf._1597	Seifhennersdorf	Carpinus_roscheri
Senckenberg Natural History Collections Dresden, Museum of Mineralogy and Geology, Paleobotanical collection	Sf._1602	Seifhennersdorf	Carpinus_roscheri
Senckenberg Natural History Collections Dresden, Museum of Mineralogy and Geology, Paleobotanical collection	Sf._1609 (II)	Seifhennersdorf	Carpinus_roscheri
Senckenberg Natural History Collections Dresden, Museum of Mineralogy and Geology, Paleobotanical collection	Sf._1616 (II)	Seifhennersdorf	Carpinus_roscheri
Senckenberg Natural History Collections Dresden, Museum of Mineralogy and Geology, Paleobotanical collection	Sf._1619 (II)	Seifhennersdorf	Carpinus_roscheri
Senckenberg Natural History Collections Dresden, Museum of Mineralogy and Geology, Paleobotanical collection	Sf._1647	Seifhennersdorf	Carpinus_roscheri
Senckenberg Natural History Collections Dresden, Museum of Mineralogy and Geology, Paleobotanical collection	Sf._1652 (II)	Seifhennersdorf	Carpinus_roscheri
Senckenberg Natural History Collections Dresden, Museum of Mineralogy and Geology, Paleobotanical collection	Sf._1655 (II)	Seifhennersdorf	Carpinus_roscheri
Senckenberg Natural History Collections Dresden, Museum of Mineralogy and Geology, Paleobotanical collection	Sf._1678	Seifhennersdorf	Carpinus_roscheri
Senckenberg Natural History Collections Dresden, Museum of Mineralogy and Geology, Paleobotanical collection	Sf._1682 (II)	Seifhennersdorf	Carpinus_roscheri
Senckenberg Natural History Collections Dresden, Museum of Mineralogy and Geology, Paleobotanical collection	Sf._1685	Seifhennersdorf	Carpinus_roscheri
Senckenberg Natural History Collections Dresden, Museum of Mineralogy and Geology, Paleobotanical collection	Sf._1698 (II)	Seifhennersdorf	Carpinus_roscheri
Senckenberg Natural History Collections Dresden, Museum of Mineralogy and Geology, Paleobotanical collection	Sf._1721	Seifhennersdorf	Carpinus_roscheri
Senckenberg Natural History Collections Dresden, Museum of Mineralogy and Geology, Paleobotanical collection	Sf._1746a	Seifhennersdorf	Carpinus_roscheri
Senckenberg Natural History Collections Dresden, Museum of Mineralogy and Geology, Paleobotanical collection	Sf._1752	Seifhennersdorf	Carpinus_roscheri
Senckenberg Natural History Collections Dresden, Museum of Mineralogy and Geology, Paleobotanical collection	Sf._1764	Seifhennersdorf	Carpinus_roscheri
Senckenberg Natural History Collections Dresden, Museum of Mineralogy and Geology, Paleobotanical collection	Sf._1777	Seifhennersdorf	Carpinus_roscheri
Senckenberg Natural History Collections Dresden, Museum of Mineralogy and Geology, Paleobotanical collection	Sf._1783	Seifhennersdorf	Carpinus_roscheri
Senckenberg Natural History Collections Dresden, Museum of Mineralogy and Geology, Paleobotanical collection	Sf._1789	Seifhennersdorf	Carpinus_roscheri
Senckenberg Natural History Collections Dresden, Museum of Mineralogy and Geology, Paleobotanical collection	Sf._1791	Seifhennersdorf	Carpinus_roscheri
Senckenberg Natural History Collections Dresden, Museum of Mineralogy and Geology, Paleobotanical collection	Sf._1801	Seifhennersdorf	Carpinus_roscheri
Senckenberg Natural History Collections Dresden, Museum of Mineralogy and Geology, Paleobotanical collection	Sf._1813	Seifhennersdorf	Carpinus_roscheri
Senckenberg Natural History Collections Dresden, Museum of Mineralogy and Geology, Paleobotanical collection	Sf._1829:1,2	Seifhennersdorf	Carpinus_roscheri
Senckenberg Natural History Collections Dresden, Museum of Mineralogy and Geology, Paleobotanical collection	Sf._1836:1,2	Seifhennersdorf	Carpinus_roscheri
Senckenberg Natural History Collections Dresden, Museum of Mineralogy and Geology, Paleobotanical collection	Sf._1838:1,2	Seifhennersdorf	Carpinus_roscheri
Senckenberg Natural History Collections Dresden, Museum of Mineralogy and Geology, Paleobotanical collection	Sf._1842	Seifhennersdorf	Carpinus_roscheri
Senckenberg Natural History Collections Dresden, Museum of Mineralogy and Geology, Paleobotanical collection	Sf._1847	Seifhennersdorf	Carpinus_roscheri
Senckenberg Natural History Collections Dresden, Museum of Mineralogy and Geology, Paleobotanical collection	Sf._1852	Seifhennersdorf	Carpinus_roscheri
Senckenberg Natural History Collections Dresden, Museum of Mineralogy and Geology, Paleobotanical collection	Sf._1858	Seifhennersdorf	Carpinus_roscheri
Senckenberg Natural History Collections Dresden, Museum of Mineralogy and Geology, Paleobotanical collection	Sf._1867	Seifhennersdorf	Carpinus_roscheri
Senckenberg Natural History Collections Dresden, Museum of Mineralogy and Geology, Paleobotanical collection	Sf._1882	Seifhennersdorf	Carpinus_roscheri
Senckenberg Natural History Collections Dresden, Museum of Mineralogy and Geology, Paleobotanical collection	Sf._1926	Seifhennersdorf	Carpinus_roscheri
Senckenberg Natural History Collections Dresden, Museum of Mineralogy and Geology, Paleobotanical collection	Sf._1941	Seifhennersdorf	Carpinus_roscheri
Senckenberg Natural History Collections Dresden, Museum of Mineralogy and Geology, Paleobotanical collection	Sf._1943	Seifhennersdorf	Carpinus_roscheri
Senckenberg Natural History Collections Dresden, Museum of Mineralogy and Geology, Paleobotanical collection	Sf._1963	Seifhennersdorf	Carpinus_roscheri
Senckenberg Natural History Collections Dresden, Museum of Mineralogy and Geology, Paleobotanical collection	Sf._1964	Seifhennersdorf	Carpinus_roscheri
Senckenberg Natural History Collections Dresden, Museum of Mineralogy and Geology, Paleobotanical collection	Sf._1970	Seifhennersdorf	Carpinus_roscheri
Senckenberg Natural History Collections Dresden, Museum of Mineralogy and Geology, Paleobotanical collection	Sf._1971	Seifhennersdorf	Carpinus_roscheri
Senckenberg Natural History Collections Dresden, Museum of Mineralogy and Geology, Paleobotanical collection	Sf._1976	Seifhennersdorf	Carpinus_roscheri
Senckenberg Natural History Collections Dresden, Museum of Mineralogy and Geology, Paleobotanical collection	Sf._1995	Seifhennersdorf	Carpinus_roscheri
Senckenberg Natural History Collections Dresden, Museum of Mineralogy and Geology, Paleobotanical collection	Sf._2009 b	Seifhennersdorf	Carpinus_roscheri
Senckenberg Natural History Collections Dresden, Museum of Mineralogy and Geology, Paleobotanical collection	Sf._2018	Seifhennersdorf	Carpinus_roscheri
Senckenberg Natural History Collections Dresden, Museum of Mineralogy and Geology, Paleobotanical collection	Sf._2020	Seifhennersdorf	Carpinus_roscheri
Senckenberg Natural History Collections Dresden, Museum of Mineralogy and Geology, Paleobotanical collection	Sf._2023	Seifhennersdorf	Carpinus_roscheri
Senckenberg Natural History Collections Dresden, Museum of Mineralogy and Geology, Paleobotanical collection	Sf._2024	Seifhennersdorf	Carpinus_roscheri
Senckenberg Natural History Collections Dresden, Museum of Mineralogy and Geology, Paleobotanical collection	Sf._2028	Seifhennersdorf	Carpinus_roscheri
Senckenberg Natural History Collections Dresden, Museum of Mineralogy and Geology, Paleobotanical collection	Sf._2029	Seifhennersdorf	Carpinus_roscheri
Senckenberg Natural History Collections Dresden, Museum of Mineralogy and Geology, Paleobotanical collection	Sf._2056	Seifhennersdorf	Carpinus_roscheri
Senckenberg Natural History Collections Dresden, Museum of Mineralogy and Geology, Paleobotanical collection	Sf._2059	Seifhennersdorf	Carpinus_roscheri
Senckenberg Natural History Collections Dresden, Museum of Mineralogy and Geology, Paleobotanical collection	Sf._2068	Seifhennersdorf	Carpinus_roscheri
Senckenberg Natural History Collections Dresden, Museum of Mineralogy and Geology, Paleobotanical collection	Sf._2087	Seifhennersdorf	Carpinus_roscheri
Senckenberg Natural History Collections Dresden, Museum of Mineralogy and Geology, Paleobotanical collection	Sf._2091	Seifhennersdorf	Carpinus_roscheri
Senckenberg Natural History Collections Dresden, Museum of Mineralogy and Geology, Paleobotanical collection	Sf._2099	Seifhennersdorf	Carpinus_roscheri
Senckenberg Natural History Collections Dresden, Museum of Mineralogy and Geology, Paleobotanical collection	Sf._2112	Seifhennersdorf	Carpinus_roscheri
Senckenberg Natural History Collections Dresden, Museum of Mineralogy and Geology, Paleobotanical collection	Sf._2121	Seifhennersdorf	Carpinus_roscheri
Senckenberg Natural History Collections Dresden, Museum of Mineralogy and Geology, Paleobotanical collection	Sf._2125	Seifhennersdorf	Carpinus_roscheri
Senckenberg Natural History Collections Dresden, Museum of Mineralogy and Geology, Paleobotanical collection	Sf._2128	Seifhennersdorf	Carpinus_roscheri
Senckenberg Natural History Collections Dresden, Museum of Mineralogy and Geology, Paleobotanical collection	Sf._2136	Seifhennersdorf	Carpinus_roscheri
Senckenberg Natural History Collections Dresden, Museum of Mineralogy and Geology, Paleobotanical collection	Sf._2156	Seifhennersdorf	Carpinus_roscheri
Senckenberg Natural History Collections Dresden, Museum of Mineralogy and Geology, Paleobotanical collection	Sf._2162	Seifhennersdorf	Carpinus_roscheri
Senckenberg Natural History Collections Dresden, Museum of Mineralogy and Geology, Paleobotanical collection	Sf._2164	Seifhennersdorf	Carpinus_roscheri
Senckenberg Natural History Collections Dresden, Museum of Mineralogy and Geology, Paleobotanical collection	Sf._2166	Seifhennersdorf	Carpinus_roscheri
Senckenberg Natural History Collections Dresden, Museum of Mineralogy and Geology, Paleobotanical collection	Sf._2177/2205	Seifhennersdorf	Carpinus_roscheri
Senckenberg Natural History Collections Dresden, Museum of Mineralogy and Geology, Paleobotanical collection	Sf._2188	Seifhennersdorf	Carpinus_roscheri
Senckenberg Natural History Collections Dresden, Museum of Mineralogy and Geology, Paleobotanical collection	Sf._2345	Seifhennersdorf	Carpinus_roscheri
Senckenberg Natural History Collections Dresden, Museum of Mineralogy and Geology, Paleobotanical collection	Sf._2811	Seifhennersdorf	Carpinus_roscheri
Senckenberg Natural History Collections Dresden, Museum of Mineralogy and Geology, Paleobotanical collection	Sf._3326	Seifhennersdorf	Carpinus_roscheri
Senckenberg Natural History Collections Dresden, Museum of Mineralogy and Geology, Paleobotanical collection	Sf._3328	Seifhennersdorf	Carpinus_roscheri
Senckenberg Natural History Collections Dresden, Museum of Mineralogy and Geology, Paleobotanical collection	Sf._3398:1,2	Seifhennersdorf	Carpinus_roscheri
Senckenberg Natural History Collections Dresden, Museum of Mineralogy and Geology, Paleobotanical collection	Sf._3416	Seifhennersdorf	Carpinus_roscheri
Senckenberg Natural History Collections Dresden, Museum of Mineralogy and Geology, Paleobotanical collection	Sf._3455:1,2	Seifhennersdorf	Carpinus_roscheri
Senckenberg Natural History Collections Dresden, Museum of Mineralogy and Geology, Paleobotanical collection	Sf._3460	Seifhennersdorf	Carpinus_roscheri
Senckenberg Natural History Collections Dresden, Museum of Mineralogy and Geology, Paleobotanical collection	Sf._3461	Seifhennersdorf	Carpinus_roscheri
Senckenberg Natural History Collections Dresden, Museum of Mineralogy and Geology, Paleobotanical collection	Sf._3506:1,2	Seifhennersdorf	Carpinus_roscheri
Senckenberg Natural History Collections Dresden, Museum of Mineralogy and Geology, Paleobotanical collection	Sf._3509:1,2	Seifhennersdorf	Carpinus_roscheri
Senckenberg Natural History Collections Dresden, Museum of Mineralogy and Geology, Paleobotanical collection	Sf._3523	Seifhennersdorf	Carpinus_roscheri
Senckenberg Natural History Collections Dresden, Museum of Mineralogy and Geology, Paleobotanical collection	Sf._3528	Seifhennersdorf	Carpinus_roscheri
Senckenberg Natural History Collections Dresden, Museum of Mineralogy and Geology, Paleobotanical collection	Sf._3530:1,2	Seifhennersdorf	Carpinus_roscheri
Senckenberg Natural History Collections Dresden, Museum of Mineralogy and Geology, Paleobotanical collection	Sf._3550	Seifhennersdorf	Carpinus_roscheri
Senckenberg Natural History Collections Dresden, Museum of Mineralogy and Geology, Paleobotanical collection	Sf._3555	Seifhennersdorf	Carpinus_roscheri
Senckenberg Natural History Collections Dresden, Museum of Mineralogy and Geology, Paleobotanical collection	Sf._3557b	Seifhennersdorf	Carpinus_roscheri
Senckenberg Natural History Collections Dresden, Museum of Mineralogy and Geology, Paleobotanical collection	Sf._3568	Seifhennersdorf	Carpinus_roscheri
Senckenberg Natural History Collections Dresden, Museum of Mineralogy and Geology, Paleobotanical collection	Sf._3580	Seifhennersdorf	Carpinus_roscheri
Senckenberg Natural History Collections Dresden, Museum of Mineralogy and Geology, Paleobotanical collection	Sf._3745	Seifhennersdorf	Carpinus_roscheri
Senckenberg Natural History Collections Dresden, Museum of Mineralogy and Geology, Paleobotanical collection	Sf._4018	Seifhennersdorf	Carpinus_roscheri
Senckenberg Natural History Collections Dresden, Museum of Mineralogy and Geology, Paleobotanical collection	Sf._4067 (II)	Seifhennersdorf	Carpinus_roscheri
Senckenberg Natural History Collections Dresden, Museum of Mineralogy and Geology, Paleobotanical collection	Sf._4098:1,2	Seifhennersdorf	Carpinus_roscheri
Senckenberg Natural History Collections Dresden, Museum of Mineralogy and Geology, Paleobotanical collection	Sf._4099:1,2	Seifhennersdorf	Carpinus_roscheri
Senckenberg Natural History Collections Dresden, Museum of Mineralogy and Geology, Paleobotanical collection	Sf._4104:1,2	Seifhennersdorf	Carpinus_roscheri
Senckenberg Natural History Collections Dresden, Museum of Mineralogy and Geology, Paleobotanical collection	Sf._4154:1,2	Seifhennersdorf	Carpinus_roscheri
Senckenberg Natural History Collections Dresden, Museum of Mineralogy and Geology, Paleobotanical collection	Sf._4190	Seifhennersdorf	Carpinus_roscheri
Senckenberg Natural History Collections Dresden, Museum of Mineralogy and Geology, Paleobotanical collection	Sf._4199	Seifhennersdorf	Carpinus_roscheri
Senckenberg Natural History Collections Dresden, Museum of Mineralogy and Geology, Paleobotanical collection	Sf._4218	Seifhennersdorf	Carpinus_roscheri
Senckenberg Natural History Collections Dresden, Museum of Mineralogy and Geology, Paleobotanical collection	Sf._4220:1,2	Seifhennersdorf	Carpinus_roscheri
Senckenberg Natural History Collections Dresden, Museum of Mineralogy and Geology, Paleobotanical collection	Sf._4242:1,2	Seifhennersdorf	Carpinus_roscheri
Senckenberg Natural History Collections Dresden, Museum of Mineralogy and Geology, Paleobotanical collection	Sf._4249:1,2	Seifhennersdorf	Carpinus_roscheri
Senckenberg Natural History Collections Dresden, Museum of Mineralogy and Geology, Paleobotanical collection	Sf._4250:1,2	Seifhennersdorf	Carpinus_roscheri
Senckenberg Natural History Collections Dresden, Museum of Mineralogy and Geology, Paleobotanical collection	Sf._4256:1,2	Seifhennersdorf	Carpinus_roscheri
Senckenberg Natural History Collections Dresden, Museum of Mineralogy and Geology, Paleobotanical collection	Sf._4308	Seifhennersdorf	Carpinus_roscheri
Senckenberg Natural History Collections Dresden, Museum of Mineralogy and Geology, Paleobotanical collection	Sf._4359	Seifhennersdorf	Carpinus_roscheri
Senckenberg Natural History Collections Dresden, Museum of Mineralogy and Geology, Paleobotanical collection	Sf._4364:1,2	Seifhennersdorf	Carpinus_roscheri
Senckenberg Natural History Collections Dresden, Museum of Mineralogy and Geology, Paleobotanical collection	Sf._4738:1,2	Seifhennersdorf	Carpinus_roscheri
Senckenberg Natural History Collections Dresden, Museum of Mineralogy and Geology, Paleobotanical collection	Sf._4740:1,2	Seifhennersdorf	Carpinus_roscheri
Senckenberg Natural History Collections Dresden, Museum of Mineralogy and Geology, Paleobotanical collection	Sf._4741:1,2	Seifhennersdorf	Carpinus_roscheri
Senckenberg Natural History Collections Dresden, Museum of Mineralogy and Geology, Paleobotanical collection	Sf._4744	Seifhennersdorf	Carpinus_roscheri
Senckenberg Natural History Collections Dresden, Museum of Mineralogy and Geology, Paleobotanical collection	Sf._4745:1,2	Seifhennersdorf	Carpinus_roscheri
Senckenberg Natural History Collections Dresden, Museum of Mineralogy and Geology, Paleobotanical collection	Sf._4747	Seifhennersdorf	Carpinus_roscheri
Senckenberg Natural History Collections Dresden, Museum of Mineralogy and Geology, Paleobotanical collection	Sf._4748	Seifhennersdorf	Carpinus_roscheri
Senckenberg Natural History Collections Dresden, Museum of Mineralogy and Geology, Paleobotanical collection	Sf._4756	Seifhennersdorf	Carpinus_roscheri
Senckenberg Natural History Collections Dresden, Museum of Mineralogy and Geology, Paleobotanical collection	Sf._4761a	Seifhennersdorf	Carpinus_roscheri
Senckenberg Natural History Collections Dresden, Museum of Mineralogy and Geology, Paleobotanical collection	Sf._4761b	Seifhennersdorf	Carpinus_roscheri
Senckenberg Natural History Collections Dresden, Museum of Mineralogy and Geology, Paleobotanical collection	Sf._4767	Seifhennersdorf	Carpinus_roscheri
Senckenberg Natural History Collections Dresden, Museum of Mineralogy and Geology, Paleobotanical collection	Sf._4779/4801	Seifhennersdorf	Carpinus_roscheri
Senckenberg Natural History Collections Dresden, Museum of Mineralogy and Geology, Paleobotanical collection	Sf._4782	Seifhennersdorf	Carpinus_roscheri
Senckenberg Natural History Collections Dresden, Museum of Mineralogy and Geology, Paleobotanical collection	Sf._4788	Seifhennersdorf	Carpinus_roscheri
Senckenberg Natural History Collections Dresden, Museum of Mineralogy and Geology, Paleobotanical collection	Sf._4796	Seifhennersdorf	Carpinus_roscheri
Senckenberg Natural History Collections Dresden, Museum of Mineralogy and Geology, Paleobotanical collection	Sf._4797	Seifhennersdorf	Carpinus_roscheri
Senckenberg Natural History Collections Dresden, Museum of Mineralogy and Geology, Paleobotanical collection	Sf._4803	Seifhennersdorf	Carpinus_roscheri
Senckenberg Natural History Collections Dresden, Museum of Mineralogy and Geology, Paleobotanical collection	Sf._4804	Seifhennersdorf	Carpinus_roscheri
Senckenberg Natural History Collections Dresden, Museum of Mineralogy and Geology, Paleobotanical collection	Sf._4806	Seifhennersdorf	Carpinus_roscheri
Senckenberg Natural History Collections Dresden, Museum of Mineralogy and Geology, Paleobotanical collection	Sf._4807	Seifhennersdorf	Carpinus_roscheri
Senckenberg Natural History Collections Dresden, Museum of Mineralogy and Geology, Paleobotanical collection	Sf._4808	Seifhennersdorf	Carpinus_roscheri
Senckenberg Natural History Collections Dresden, Museum of Mineralogy and Geology, Paleobotanical collection	Sf._4826	Seifhennersdorf	Carpinus_roscheri
Senckenberg Natural History Collections Dresden, Museum of Mineralogy and Geology, Paleobotanical collection	Sf._4827	Seifhennersdorf	Carpinus_roscheri
Senckenberg Natural History Collections Dresden, Museum of Mineralogy and Geology, Paleobotanical collection	Sf._4829	Seifhennersdorf	Carpinus_roscheri
Senckenberg Natural History Collections Dresden, Museum of Mineralogy and Geology, Paleobotanical collection	Sf._4832	Seifhennersdorf	Carpinus_roscheri
Senckenberg Natural History Collections Dresden, Museum of Mineralogy and Geology, Paleobotanical collection	Sf._4836:1,2	Seifhennersdorf	Carpinus_roscheri
Senckenberg Natural History Collections Dresden, Museum of Mineralogy and Geology, Paleobotanical collection	Sf._4839	Seifhennersdorf	Carpinus_roscheri
Senckenberg Natural History Collections Dresden, Museum of Mineralogy and Geology, Paleobotanical collection	Sf._4840:1,2	Seifhennersdorf	Carpinus_roscheri
Senckenberg Natural History Collections Dresden, Museum of Mineralogy and Geology, Paleobotanical collection	Sf._4841	Seifhennersdorf	Carpinus_roscheri
Senckenberg Natural History Collections Dresden, Museum of Mineralogy and Geology, Paleobotanical collection	Sf._4845	Seifhennersdorf	Carpinus_roscheri
Senckenberg Natural History Collections Dresden, Museum of Mineralogy and Geology, Paleobotanical collection	Sf._4846	Seifhennersdorf	Carpinus_roscheri
Senckenberg Natural History Collections Dresden, Museum of Mineralogy and Geology, Paleobotanical collection	Sf._4848	Seifhennersdorf	Carpinus_roscheri
Senckenberg Natural History Collections Dresden, Museum of Mineralogy and Geology, Paleobotanical collection	Sf._4854	Seifhennersdorf	Carpinus_roscheri
Senckenberg Natural History Collections Dresden, Museum of Mineralogy and Geology, Paleobotanical collection	Sf._4855	Seifhennersdorf	Carpinus_roscheri
Senckenberg Natural History Collections Dresden, Museum of Mineralogy and Geology, Paleobotanical collection	Sf._4856	Seifhennersdorf	Carpinus_roscheri
Senckenberg Natural History Collections Dresden, Museum of Mineralogy and Geology, Paleobotanical collection	Sf._4857	Seifhennersdorf	Carpinus_roscheri
Senckenberg Natural History Collections Dresden, Museum of Mineralogy and Geology, Paleobotanical collection	Sf._4859	Seifhennersdorf	Carpinus_roscheri
Senckenberg Natural History Collections Dresden, Museum of Mineralogy and Geology, Paleobotanical collection	Sf._4863	Seifhennersdorf	Carpinus_roscheri
Senckenberg Natural History Collections Dresden, Museum of Mineralogy and Geology, Paleobotanical collection	Sf._4867:1,2	Seifhennersdorf	Carpinus_roscheri
Senckenberg Natural History Collections Dresden, Museum of Mineralogy and Geology, Paleobotanical collection	Sf._4869	Seifhennersdorf	Carpinus_roscheri
Senckenberg Natural History Collections Dresden, Museum of Mineralogy and Geology, Paleobotanical collection	Sf._4871	Seifhennersdorf	Carpinus_roscheri
Senckenberg Natural History Collections Dresden, Museum of Mineralogy and Geology, Paleobotanical collection	Sf._4872	Seifhennersdorf	Carpinus_roscheri
Senckenberg Natural History Collections Dresden, Museum of Mineralogy and Geology, Paleobotanical collection	Sf._4873	Seifhennersdorf	Carpinus_roscheri
Senckenberg Natural History Collections Dresden, Museum of Mineralogy and Geology, Paleobotanical collection	Sf._4875	Seifhennersdorf	Carpinus_roscheri
Senckenberg Natural History Collections Dresden, Museum of Mineralogy and Geology, Paleobotanical collection	Sf._4876	Seifhennersdorf	Carpinus_roscheri
Senckenberg Natural History Collections Dresden, Museum of Mineralogy and Geology, Paleobotanical collection	Sf._4886:1,2a	Seifhennersdorf	Carpinus_roscheri
Senckenberg Natural History Collections Dresden, Museum of Mineralogy and Geology, Paleobotanical collection	Sf._4886:2b	Seifhennersdorf	Carpinus_roscheri
Senckenberg Natural History Collections Dresden, Museum of Mineralogy and Geology, Paleobotanical collection	Sf._4887:1,2a	Seifhennersdorf	Carpinus_roscheri
Senckenberg Natural History Collections Dresden, Museum of Mineralogy and Geology, Paleobotanical collection	Sf._4888	Seifhennersdorf	Carpinus_roscheri
Senckenberg Natural History Collections Dresden, Museum of Mineralogy and Geology, Paleobotanical collection	Sf._4889	Seifhennersdorf	Carpinus_roscheri
Senckenberg Natural History Collections Dresden, Museum of Mineralogy and Geology, Paleobotanical collection	Sf._4892	Seifhennersdorf	Carpinus_roscheri
Senckenberg Natural History Collections Dresden, Museum of Mineralogy and Geology, Paleobotanical collection	Sf._4894	Seifhennersdorf	Carpinus_roscheri
Senckenberg Natural History Collections Dresden, Museum of Mineralogy and Geology, Paleobotanical collection	Sf._4895	Seifhennersdorf	Carpinus_roscheri
Senckenberg Natural History Collections Dresden, Museum of Mineralogy and Geology, Paleobotanical collection	Sf._4901	Seifhennersdorf	Carpinus_roscheri
Senckenberg Natural History Collections Dresden, Museum of Mineralogy and Geology, Paleobotanical collection	Sf._4906	Seifhennersdorf	Carpinus_roscheri
Senckenberg Natural History Collections Dresden, Museum of Mineralogy and Geology, Paleobotanical collection	Sf._4908a	Seifhennersdorf	Carpinus_roscheri
Senckenberg Natural History Collections Dresden, Museum of Mineralogy and Geology, Paleobotanical collection	Sf._4910b	Seifhennersdorf	Carpinus_roscheri
Senckenberg Natural History Collections Dresden, Museum of Mineralogy and Geology, Paleobotanical collection	Sf._4918	Seifhennersdorf	Carpinus_roscheri
Senckenberg Natural History Collections Dresden, Museum of Mineralogy and Geology, Paleobotanical collection	Sf._4919	Seifhennersdorf	Carpinus_roscheri
Senckenberg Natural History Collections Dresden, Museum of Mineralogy and Geology, Paleobotanical collection	Sf._4922	Seifhennersdorf	Carpinus_roscheri
Senckenberg Natural History Collections Dresden, Museum of Mineralogy and Geology, Paleobotanical collection	Sf._4929	Seifhennersdorf	Carpinus_roscheri
Senckenberg Natural History Collections Dresden, Museum of Mineralogy and Geology, Paleobotanical collection	Sf._4933	Seifhennersdorf	Carpinus_roscheri
Senckenberg Natural History Collections Dresden, Museum of Mineralogy and Geology, Paleobotanical collection	Sf._4934	Seifhennersdorf	Carpinus_roscheri
Senckenberg Natural History Collections Dresden, Museum of Mineralogy and Geology, Paleobotanical collection	Sf._4935a	Seifhennersdorf	Carpinus_roscheri
Senckenberg Natural History Collections Dresden, Museum of Mineralogy and Geology, Paleobotanical collection	Sf._4948	Seifhennersdorf	Carpinus_roscheri
Senckenberg Natural History Collections Dresden, Museum of Mineralogy and Geology, Paleobotanical collection	Sf._4960	Seifhennersdorf	Carpinus_roscheri
Senckenberg Natural History Collections Dresden, Museum of Mineralogy and Geology, Paleobotanical collection	Sf._4961:1,2	Seifhennersdorf	Carpinus_roscheri
Senckenberg Natural History Collections Dresden, Museum of Mineralogy and Geology, Paleobotanical collection	Sf._4962	Seifhennersdorf	Carpinus_roscheri
Senckenberg Natural History Collections Dresden, Museum of Mineralogy and Geology, Paleobotanical collection	Sf._4963	Seifhennersdorf	Carpinus_roscheri
Senckenberg Natural History Collections Dresden, Museum of Mineralogy and Geology, Paleobotanical collection	Sf._4967a	Seifhennersdorf	Carpinus_roscheri
Senckenberg Natural History Collections Dresden, Museum of Mineralogy and Geology, Paleobotanical collection	Sf._4974a	Seifhennersdorf	Carpinus_roscheri
Senckenberg Natural History Collections Dresden, Museum of Mineralogy and Geology, Paleobotanical collection	Sf._4974b	Seifhennersdorf	Carpinus_roscheri
Senckenberg Natural History Collections Dresden, Museum of Mineralogy and Geology, Paleobotanical collection	Sf._4982	Seifhennersdorf	Carpinus_roscheri
Senckenberg Natural History Collections Dresden, Museum of Mineralogy and Geology, Paleobotanical collection	Sf._4990	Seifhennersdorf	Carpinus_roscheri
Senckenberg Natural History Collections Dresden, Museum of Mineralogy and Geology, Paleobotanical collection	Sf._4993	Seifhennersdorf	Carpinus_roscheri
Senckenberg Natural History Collections Dresden, Museum of Mineralogy and Geology, Paleobotanical collection	Sf._5010	Seifhennersdorf	Carpinus_roscheri
Senckenberg Natural History Collections Dresden, Museum of Mineralogy and Geology, Paleobotanical collection	Sf._5018	Seifhennersdorf	Carpinus_roscheri
Senckenberg Natural History Collections Dresden, Museum of Mineralogy and Geology, Paleobotanical collection	Sf._5020	Seifhennersdorf	Carpinus_roscheri
Senckenberg Natural History Collections Dresden, Museum of Mineralogy and Geology, Paleobotanical collection	Sf._5028	Seifhennersdorf	Carpinus_roscheri
Senckenberg Natural History Collections Dresden, Museum of Mineralogy and Geology, Paleobotanical collection	Sf._5035	Seifhennersdorf	Carpinus_roscheri
Senckenberg Natural History Collections Dresden, Museum of Mineralogy and Geology, Paleobotanical collection	Sf._5037	Seifhennersdorf	Carpinus_roscheri
Senckenberg Natural History Collections Dresden, Museum of Mineralogy and Geology, Paleobotanical collection	Sf._5041	Seifhennersdorf	Carpinus_roscheri
Senckenberg Natural History Collections Dresden, Museum of Mineralogy and Geology, Paleobotanical collection	Sf._5042:1,2	Seifhennersdorf	Carpinus_roscheri
Senckenberg Natural History Collections Dresden, Museum of Mineralogy and Geology, Paleobotanical collection	Sf._5053	Seifhennersdorf	Carpinus_roscheri
Senckenberg Natural History Collections Dresden, Museum of Mineralogy and Geology, Paleobotanical collection	Sf._5059	Seifhennersdorf	Carpinus_roscheri
Senckenberg Natural History Collections Dresden, Museum of Mineralogy and Geology, Paleobotanical collection	Sf._5060b	Seifhennersdorf	Carpinus_roscheri
Senckenberg Natural History Collections Dresden, Museum of Mineralogy and Geology, Paleobotanical collection	Sf._5062	Seifhennersdorf	Carpinus_roscheri
Senckenberg Natural History Collections Dresden, Museum of Mineralogy and Geology, Paleobotanical collection	Sf._5065	Seifhennersdorf	Carpinus_roscheri
Senckenberg Natural History Collections Dresden, Museum of Mineralogy and Geology, Paleobotanical collection	Sf._5067	Seifhennersdorf	Carpinus_roscheri
Senckenberg Natural History Collections Dresden, Museum of Mineralogy and Geology, Paleobotanical collection	Sf._5068	Seifhennersdorf	Carpinus_roscheri
Senckenberg Natural History Collections Dresden, Museum of Mineralogy and Geology, Paleobotanical collection	Sf._5071/5070	Seifhennersdorf	Carpinus_roscheri
Senckenberg Natural History Collections Dresden, Museum of Mineralogy and Geology, Paleobotanical collection	Sf._5072:1,2	Seifhennersdorf	Carpinus_roscheri
Senckenberg Natural History Collections Dresden, Museum of Mineralogy and Geology, Paleobotanical collection	Sf._5075	Seifhennersdorf	Carpinus_roscheri
Senckenberg Natural History Collections Dresden, Museum of Mineralogy and Geology, Paleobotanical collection	Sf._5076	Seifhennersdorf	Carpinus_roscheri
Senckenberg Natural History Collections Dresden, Museum of Mineralogy and Geology, Paleobotanical collection	Sf._5079	Seifhennersdorf	Carpinus_roscheri
Senckenberg Natural History Collections Dresden, Museum of Mineralogy and Geology, Paleobotanical collection	Sf._5085:1,2	Seifhennersdorf	Carpinus_roscheri
Senckenberg Natural History Collections Dresden, Museum of Mineralogy and Geology, Paleobotanical collection	Sf._5086:1,2	Seifhennersdorf	Carpinus_roscheri
Senckenberg Natural History Collections Dresden, Museum of Mineralogy and Geology, Paleobotanical collection	Sf._5097	Seifhennersdorf	Carpinus_roscheri
Senckenberg Natural History Collections Dresden, Museum of Mineralogy and Geology, Paleobotanical collection	Sf._5098	Seifhennersdorf	Carpinus_roscheri
Senckenberg Natural History Collections Dresden, Museum of Mineralogy and Geology, Paleobotanical collection	Sf._5107	Seifhennersdorf	Carpinus_roscheri
Senckenberg Natural History Collections Dresden, Museum of Mineralogy and Geology, Paleobotanical collection	Sf._5108	Seifhennersdorf	Carpinus_roscheri
Senckenberg Natural History Collections Dresden, Museum of Mineralogy and Geology, Paleobotanical collection	Sf._5113	Seifhennersdorf	Carpinus_roscheri
Senckenberg Natural History Collections Dresden, Museum of Mineralogy and Geology, Paleobotanical collection	Sf._5118	Seifhennersdorf	Carpinus_roscheri
Senckenberg Natural History Collections Dresden, Museum of Mineralogy and Geology, Paleobotanical collection	Sf._5119	Seifhennersdorf	Carpinus_roscheri
Senckenberg Natural History Collections Dresden, Museum of Mineralogy and Geology, Paleobotanical collection	Sf._5124	Seifhennersdorf	Carpinus_roscheri
Senckenberg Natural History Collections Dresden, Museum of Mineralogy and Geology, Paleobotanical collection	Sf._5133	Seifhennersdorf	Carpinus_roscheri
Senckenberg Natural History Collections Dresden, Museum of Mineralogy and Geology, Paleobotanical collection	Sf._5135	Seifhennersdorf	Carpinus_roscheri
Senckenberg Natural History Collections Dresden, Museum of Mineralogy and Geology, Paleobotanical collection	Sf._5147	Seifhennersdorf	Carpinus_roscheri
Senckenberg Natural History Collections Dresden, Museum of Mineralogy and Geology, Paleobotanical collection	Sf._5154	Seifhennersdorf	Carpinus_roscheri
Senckenberg Natural History Collections Dresden, Museum of Mineralogy and Geology, Paleobotanical collection	Sf._5156	Seifhennersdorf	Carpinus_roscheri
Senckenberg Natural History Collections Dresden, Museum of Mineralogy and Geology, Paleobotanical collection	Sf._5157	Seifhennersdorf	Carpinus_roscheri
Senckenberg Natural History Collections Dresden, Museum of Mineralogy and Geology, Paleobotanical collection	Sf._5158	Seifhennersdorf	Carpinus_roscheri
Senckenberg Natural History Collections Dresden, Museum of Mineralogy and Geology, Paleobotanical collection	Sf._5160:1,2	Seifhennersdorf	Carpinus_roscheri
Senckenberg Natural History Collections Dresden, Museum of Mineralogy and Geology, Paleobotanical collection	Sf._5169	Seifhennersdorf	Carpinus_roscheri
Senckenberg Natural History Collections Dresden, Museum of Mineralogy and Geology, Paleobotanical collection	Sf._5170	Seifhennersdorf	Carpinus_roscheri
Senckenberg Natural History Collections Dresden, Museum of Mineralogy and Geology, Paleobotanical collection	Sf._5178	Seifhennersdorf	Carpinus_roscheri
Senckenberg Natural History Collections Dresden, Museum of Mineralogy and Geology, Paleobotanical collection	Sf._5192	Seifhennersdorf	Carpinus_roscheri
Senckenberg Natural History Collections Dresden, Museum of Mineralogy and Geology, Paleobotanical collection	Sf._5197c	Seifhennersdorf	Carpinus_roscheri
Senckenberg Natural History Collections Dresden, Museum of Mineralogy and Geology, Paleobotanical collection	Sf._5198	Seifhennersdorf	Carpinus_roscheri
Senckenberg Natural History Collections Dresden, Museum of Mineralogy and Geology, Paleobotanical collection	Sf._5201	Seifhennersdorf	Carpinus_roscheri
Senckenberg Natural History Collections Dresden, Museum of Mineralogy and Geology, Paleobotanical collection	Sf._5211:1,2	Seifhennersdorf	Carpinus_roscheri
Senckenberg Natural History Collections Dresden, Museum of Mineralogy and Geology, Paleobotanical collection	Sf._5216	Seifhennersdorf	Carpinus_roscheri
Senckenberg Natural History Collections Dresden, Museum of Mineralogy and Geology, Paleobotanical collection	Sf._5220	Seifhennersdorf	Carpinus_roscheri
Senckenberg Natural History Collections Dresden, Museum of Mineralogy and Geology, Paleobotanical collection	Sf._5225	Seifhennersdorf	Carpinus_roscheri
Senckenberg Natural History Collections Dresden, Museum of Mineralogy and Geology, Paleobotanical collection	Sf._5227:1,2	Seifhennersdorf	Carpinus_roscheri
Senckenberg Natural History Collections Dresden, Museum of Mineralogy and Geology, Paleobotanical collection	Sf._5228:1,2	Seifhennersdorf	Carpinus_roscheri
Senckenberg Natural History Collections Dresden, Museum of Mineralogy and Geology, Paleobotanical collection	Sf._5230a	Seifhennersdorf	Carpinus_roscheri
Senckenberg Natural History Collections Dresden, Museum of Mineralogy and Geology, Paleobotanical collection	Sf._5256/5231	Seifhennersdorf	Carpinus_roscheri
Senckenberg Natural History Collections Dresden, Museum of Mineralogy and Geology, Paleobotanical collection	Sf._5257	Seifhennersdorf	Carpinus_roscheri
Senckenberg Natural History Collections Dresden, Museum of Mineralogy and Geology, Paleobotanical collection	Sf._5263:1,2a	Seifhennersdorf	Carpinus_roscheri
Senckenberg Natural History Collections Dresden, Museum of Mineralogy and Geology, Paleobotanical collection	Sf._5461b	Seifhennersdorf	Carpinus_roscheri
Senckenberg Natural History Collections Dresden, Museum of Mineralogy and Geology, Paleobotanical collection	Sf._6621	Seifhennersdorf	Carpinus_roscheri
Senckenberg Natural History Collections Dresden, Museum of Mineralogy and Geology, Paleobotanical collection	Sf._6626	Seifhennersdorf	Carpinus_roscheri
Senckenberg Natural History Collections Dresden, Museum of Mineralogy and Geology, Paleobotanical collection	Sf._7826:1,2a	Seifhennersdorf	Carpinus_roscheri
Senckenberg Natural History Collections Dresden, Museum of Mineralogy and Geology, Paleobotanical collection	Sf._7826:2,3a	Seifhennersdorf	Carpinus_roscheri
Senckenberg Natural History Collections Dresden, Museum of Mineralogy and Geology, Paleobotanical collection	Sf._8097	Seifhennersdorf	Carpinus_roscheri
Senckenberg Natural History Collections Dresden, Museum of Mineralogy and Geology, Paleobotanical collection	Sf._8115	Seifhennersdorf	Carpinus_roscheri
Senckenberg Natural History Collections Dresden, Museum of Mineralogy and Geology, Paleobotanical collection	Sf._8120	Seifhennersdorf	Carpinus_roscheri
Senckenberg Natural History Collections Dresden, Museum of Mineralogy and Geology, Paleobotanical collection	Sf._8157	Seifhennersdorf	Carpinus_roscheri
Senckenberg Natural History Collections Dresden, Museum of Mineralogy and Geology, Paleobotanical collection	Sf._8158	Seifhennersdorf	Carpinus_roscheri
Senckenberg Natural History Collections Dresden, Museum of Mineralogy and Geology, Paleobotanical collection	Sf._8161	Seifhennersdorf	Carpinus_roscheri
Senckenberg Natural History Collections Dresden, Museum of Mineralogy and Geology, Paleobotanical collection	Sf._8191	Seifhennersdorf	Carpinus_roscheri
Senckenberg Natural History Collections Dresden, Museum of Mineralogy and Geology, Paleobotanical collection	Sf._8267a	Seifhennersdorf	Carpinus_roscheri
Senckenberg Natural History Collections Dresden, Museum of Mineralogy and Geology, Paleobotanical collection	Sf._8272	Seifhennersdorf	Carpinus_roscheri
Senckenberg Natural History Collections Dresden, Museum of Mineralogy and Geology, Paleobotanical collection	Sf._8408	Seifhennersdorf	Carpinus_roscheri
Senckenberg Natural History Collections Dresden, Museum of Mineralogy and Geology, Paleobotanical collection	Sf._8433	Seifhennersdorf	Carpinus_roscheri
Senckenberg Natural History Collections Dresden, Museum of Mineralogy and Geology, Paleobotanical collection	Sf._8435	Seifhennersdorf	Carpinus_roscheri
Senckenberg Natural History Collections Dresden, Museum of Mineralogy and Geology, Paleobotanical collection	Sf._8443:1,2	Seifhennersdorf	Carpinus_roscheri
Senckenberg Natural History Collections Dresden, Museum of Mineralogy and Geology, Paleobotanical collection	Sf._8444	Seifhennersdorf	Carpinus_roscheri
Senckenberg Natural History Collections Dresden, Museum of Mineralogy and Geology, Paleobotanical collection	Sf._8473:1,2,3	Seifhennersdorf	Carpinus_roscheri
Senckenberg Natural History Collections Dresden, Museum of Mineralogy and Geology, Paleobotanical collection	Sf._8474	Seifhennersdorf	Carpinus_roscheri
Senckenberg Natural History Collections Dresden, Museum of Mineralogy and Geology, Paleobotanical collection	Sf._8481	Seifhennersdorf	Carpinus_roscheri
Senckenberg Natural History Collections Dresden, Museum of Mineralogy and Geology, Paleobotanical collection	Sf._8486:1,2	Seifhennersdorf	Carpinus_roscheri
Senckenberg Natural History Collections Dresden, Museum of Mineralogy and Geology, Paleobotanical collection	Sf._8488	Seifhennersdorf	Carpinus_roscheri
Senckenberg Natural History Collections Dresden, Museum of Mineralogy and Geology, Paleobotanical collection	Sf._8490	Seifhennersdorf	Carpinus_roscheri
Senckenberg Natural History Collections Dresden, Museum of Mineralogy and Geology, Paleobotanical collection	Sf._8506	Seifhennersdorf	Carpinus_roscheri
Senckenberg Natural History Collections Dresden, Museum of Mineralogy and Geology, Paleobotanical collection	Sf._8519 (I)	Seifhennersdorf	Carpinus_roscheri
Senckenberg Natural History Collections Dresden, Museum of Mineralogy and Geology, Paleobotanical collection	Sf._8535:1,2	Seifhennersdorf	Carpinus_roscheri
Senckenberg Natural History Collections Dresden, Museum of Mineralogy and Geology, Paleobotanical collection	Sf._8549	Seifhennersdorf	Carpinus_roscheri
Senckenberg Natural History Collections Dresden, Museum of Mineralogy and Geology, Paleobotanical collection	Sf._8573	Seifhennersdorf	Carpinus_roscheri
Senckenberg Natural History Collections Dresden, Museum of Mineralogy and Geology, Paleobotanical collection	Sf._8593	Seifhennersdorf	Carpinus_roscheri
Senckenberg Natural History Collections Dresden, Museum of Mineralogy and Geology, Paleobotanical collection	Sf._8613	Seifhennersdorf	Carpinus_roscheri
Senckenberg Natural History Collections Dresden, Museum of Mineralogy and Geology, Paleobotanical collection	Sf._8650	Seifhennersdorf	Carpinus_roscheri
Senckenberg Natural History Collections Dresden, Museum of Mineralogy and Geology, Paleobotanical collection	Sf._924	Seifhennersdorf	Betulaceae_indet
Senckenberg Natural History Collections Dresden, Museum of Mineralogy and Geology, Paleobotanical collection	Sf._1374	Seifhennersdorf	Betulaceae_indet
Senckenberg Natural History Collections Dresden, Museum of Mineralogy and Geology, Paleobotanical collection	Sf._1375	Seifhennersdorf	Betulaceae_indet
Senckenberg Natural History Collections Dresden, Museum of Mineralogy and Geology, Paleobotanical collection	Sf._1378/1	Seifhennersdorf	Betulaceae_indet
Senckenberg Natural History Collections Dresden, Museum of Mineralogy and Geology, Paleobotanical collection	Sf._1378/2	Seifhennersdorf	Betulaceae_indet
Senckenberg Natural History Collections Dresden, Museum of Mineralogy and Geology, Paleobotanical collection	Sf._1381:1,2	Seifhennersdorf	Betulaceae_indet
Senckenberg Natural History Collections Dresden, Museum of Mineralogy and Geology, Paleobotanical collection	Sf._1516	Seifhennersdorf	Betulaceae_indet
Senckenberg Natural History Collections Dresden, Museum of Mineralogy and Geology, Paleobotanical collection	Sf._1546	Seifhennersdorf	Betulaceae_indet
Senckenberg Natural History Collections Dresden, Museum of Mineralogy and Geology, Paleobotanical collection	Sf._1548	Seifhennersdorf	Betulaceae_indet
Senckenberg Natural History Collections Dresden, Museum of Mineralogy and Geology, Paleobotanical collection	Sf._1563	Seifhennersdorf	Betulaceae_indet
Senckenberg Natural History Collections Dresden, Museum of Mineralogy and Geology, Paleobotanical collection	Sf._1615	Seifhennersdorf	Betulaceae_indet
Senckenberg Natural History Collections Dresden, Museum of Mineralogy and Geology, Paleobotanical collection	Sf._1640 (II)	Seifhennersdorf	Betulaceae_indet
Senckenberg Natural History Collections Dresden, Museum of Mineralogy and Geology, Paleobotanical collection	Sf._1648 (I)	Seifhennersdorf	Betulaceae_indet
Senckenberg Natural History Collections Dresden, Museum of Mineralogy and Geology, Paleobotanical collection	Sf._1663	Seifhennersdorf	Betulaceae_indet
Senckenberg Natural History Collections Dresden, Museum of Mineralogy and Geology, Paleobotanical collection	Sf._1763	Seifhennersdorf	Betulaceae_indet
Senckenberg Natural History Collections Dresden, Museum of Mineralogy and Geology, Paleobotanical collection	Sf._1767	Seifhennersdorf	Betulaceae_indet
Senckenberg Natural History Collections Dresden, Museum of Mineralogy and Geology, Paleobotanical collection	Sf._1776	Seifhennersdorf	Betulaceae_indet
Senckenberg Natural History Collections Dresden, Museum of Mineralogy and Geology, Paleobotanical collection	Sf._1815	Seifhennersdorf	Betulaceae_indet
Senckenberg Natural History Collections Dresden, Museum of Mineralogy and Geology, Paleobotanical collection	Sf._1859	Seifhennersdorf	Betulaceae_indet
Senckenberg Natural History Collections Dresden, Museum of Mineralogy and Geology, Paleobotanical collection	Sf._1874	Seifhennersdorf	Betulaceae_indet
Senckenberg Natural History Collections Dresden, Museum of Mineralogy and Geology, Paleobotanical collection	Sf._1887	Seifhennersdorf	Betulaceae_indet
Senckenberg Natural History Collections Dresden, Museum of Mineralogy and Geology, Paleobotanical collection	Sf._1889	Seifhennersdorf	Betulaceae_indet
Senckenberg Natural History Collections Dresden, Museum of Mineralogy and Geology, Paleobotanical collection	Sf._1909	Seifhennersdorf	Betulaceae_indet
Senckenberg Natural History Collections Dresden, Museum of Mineralogy and Geology, Paleobotanical collection	Sf._1927	Seifhennersdorf	Betulaceae_indet
Senckenberg Natural History Collections Dresden, Museum of Mineralogy and Geology, Paleobotanical collection	Sf._1950	Seifhennersdorf	Betulaceae_indet
Senckenberg Natural History Collections Dresden, Museum of Mineralogy and Geology, Paleobotanical collection	Sf._1951	Seifhennersdorf	Betulaceae_indet
Senckenberg Natural History Collections Dresden, Museum of Mineralogy and Geology, Paleobotanical collection	Sf._1954	Seifhennersdorf	Betulaceae_indet
Senckenberg Natural History Collections Dresden, Museum of Mineralogy and Geology, Paleobotanical collection	Sf._1972	Seifhennersdorf	Betulaceae_indet
Senckenberg Natural History Collections Dresden, Museum of Mineralogy and Geology, Paleobotanical collection	Sf._2000	Seifhennersdorf	Betulaceae_indet
Senckenberg Natural History Collections Dresden, Museum of Mineralogy and Geology, Paleobotanical collection	Sf._2060	Seifhennersdorf	Betulaceae_indet
Senckenberg Natural History Collections Dresden, Museum of Mineralogy and Geology, Paleobotanical collection	Sf._2106	Seifhennersdorf	Betulaceae_indet
Senckenberg Natural History Collections Dresden, Museum of Mineralogy and Geology, Paleobotanical collection	Sf._2124	Seifhennersdorf	Betulaceae_indet
Senckenberg Natural History Collections Dresden, Museum of Mineralogy and Geology, Paleobotanical collection	Sf._2132	Seifhennersdorf	Betulaceae_indet
Senckenberg Natural History Collections Dresden, Museum of Mineralogy and Geology, Paleobotanical collection	Sf._2151	Seifhennersdorf	Betulaceae_indet
Senckenberg Natural History Collections Dresden, Museum of Mineralogy and Geology, Paleobotanical collection	Sf._2153	Seifhennersdorf	Betulaceae_indet
Senckenberg Natural History Collections Dresden, Museum of Mineralogy and Geology, Paleobotanical collection	Sf._2169:1,2	Seifhennersdorf	Betulaceae_indet
Senckenberg Natural History Collections Dresden, Museum of Mineralogy and Geology, Paleobotanical collection	Sf._2179	Seifhennersdorf	Betulaceae_indet
Senckenberg Natural History Collections Dresden, Museum of Mineralogy and Geology, Paleobotanical collection	Sf._2184	Seifhennersdorf	Betulaceae_indet
Senckenberg Natural History Collections Dresden, Museum of Mineralogy and Geology, Paleobotanical collection	Sf._2190	Seifhennersdorf	Betulaceae_indet
Senckenberg Natural History Collections Dresden, Museum of Mineralogy and Geology, Paleobotanical collection	Sf._2194	Seifhennersdorf	Betulaceae_indet
Senckenberg Natural History Collections Dresden, Museum of Mineralogy and Geology, Paleobotanical collection	Sf._2199	Seifhennersdorf	Betulaceae_indet
[truncated: 4,285 more rows]

## Sheet: read me
all specimens are stored in the Senckenberg Natural History Collections Dresden, Museum of Mineralogy and Geology, Paleobotanical collection
Adress: Königsbrücker Landstraße 159, 01109 Dresden, Germany
specimen_ ID represents the collection number for each analyzed leaf specimen
each line represents a single leaf specimen
