# Supplementary material for: An integrated leaf trait analysis of two Paleogene leaf floras
Source: PeerJ. 2023 Apr 10;11:e15140. doi: 10.7717/peerj.15140 (PMC10100813; doi:10.7717/peerj.15140)
Supplement: Supplemental Information 13 — All taxonomic, Trait Combination Type, and insect damage type determinations as well as quantitative leaf trait measurements (preservation index, leaf area, leaf mass per area, leaf length, leaf width, length/width ratio) for all studied leaves or graphical digitized leaves. [file peerj-11-15140-s013.xlsx]

## Sheet: read me
column	explenation
A-G	General information and sampling
A	all specimens are stored in the palaeobotanical collection (PB) of the Senckenberg Natural History Collections Dresden (SNSD), Museum of Mineralogy and Geology (MMG)
B	collection number, Sf = Seifhennersdorf, SuBe = Suletice-Berand
C	1 = leaves included in Dataset 1, selection criterion = taxonomic determination, morphological traits
D	1 = leaves included in Dataset 2, selection criterion = ~70 % of leaf lamina preserved
E	1 = leaves included in Dataset 3, selection criterion = random selection from Dataset 2
F	1 = leaves with LMA value (petiole at ist insertion point measurable)
G	locality name
H	stratigraphy
H-L	taxonomic affiliation of the specimen
I	family
J	genus
K	species
L	phenology (deciduous vs. evergreen) derived from modern living relatives
M	growth form derived from modern living relatives
M-S	morphological traits and Trait Combination Type (TCT) analysis
N	leaf lobation
O	character of the leaf margin
P	character of the primary venation
Q	character of the secondary venation (orange + italic, trait derived from fossil-species diagnosis, hardly visible at the specimen)
R	specimen-based TCT approach (TCT determination based on features recognizable on specimen)
S	taxonomy-based TCT (TCT determination based on fossil-species diagnosis)
T	combined specimen-taxonomy-based TCT approach (replacement of uncertain specimen-based TCTs by taxonomy-based TCTs, replacements = orange + italics), used for analysis!
T-AE	Insect herbivory traces
AC	leaf shows damage caused by insect herbivory; independently from type of damage, number and richness of damage types; for explenations see Material & Methods section
AD	leaf shows damage caused by hole feeding of insect herbivores; independently from number and richness of damage types; for explenations see Material & Methods section
AE	leaf shows damage caused by leaf margin feeding of insect herbivores; independently from number and richness of damage types; for explenations see Material & Methods section
AF	leaf shows damage caused by leaf skeletonizing of insect herbivores; independently from number and richness of damage types; for explenations see Material & Methods section
AG	leaf shows damage caused by leaf surface feeding of insect herbivores; independently from number and richness of damage types; for explenations see Material & Methods section
AH	leaf shows insect galls; independently from number and richness of damage types; for explenations see Material & Methods section
AI	leaf shows leaf mines of insects; independently from number and richness of damage types; for explenations see Material & Methods section
AJ-AL	observed insect damage type (DT) numbers based on the catalogue of Labandeira et al., 2007; for explenations see Material & Methods section

## Sheet: data
collection	collection number	Dataset 1	Dataset 2	Dataset 3	locality	stratigraphy	family	genus	species	phenology	growth form	lobation	margin	1°venation	2°venation	specimen_TCT	taxonon_TCT	combined_TCT	Interaction	Hole Feeding	Margin Feeding	Skeletonization	Surface Feeding	Galling	Leaf mining	Damage type number Labandeira et al. (2007)
SNSD, MMG_PB	Sf._3	1	1		Seifhennersdorf	Lower Oligocene	Sapindaceae	Acer	Acer_angustilobum	deciduous	tree	lobed	dentate	palmate	non-looped	P	P	P	no	no	no	no	no	no	no
SNSD, MMG_PB	Sf._6:1,2	1	1	1	Seifhennersdorf	Lower Oligocene	Sapindaceae	Acer	Acer_angustilobum	deciduous	tree	lobed	dentate	palmate	non-looped	P	P	P	no	no	no	no	no	no	no
SNSD, MMG_PB	Sf._10	1	1	1	Seifhennersdorf	Lower Oligocene	Sapindaceae	Acer	Acer_angustilobum	deciduous	tree	lobed	dentate	palmate	non-looped	P	P	P	no	no	no	no	no	no	no
SNSD, MMG_PB	Sf._25:1,2 (I)	1			Seifhennersdorf	Lower Oligocene	Sapindaceae	Acer	Acer_angustilobum	deciduous	tree	lobed	dentate	palmate	non-looped	P	P	P	no	no	no	no	no	no	no
SNSD, MMG_PB	Sf._26	1			Seifhennersdorf	Lower Oligocene	Sapindaceae	Acer	Acer_angustilobum	deciduous	tree	lobed	dentate	palmate	non-looped	P	P	P	no	no	no	no	no	no	no
SNSD, MMG_PB	Sf._34	1			Seifhennersdorf	Lower Oligocene	Sapindaceae	Acer	Acer_angustilobum	deciduous	tree	lobed	dentate	palmate	non-looped	P	P	P	no	no	no	no	no	no	no
SNSD, MMG_PB	Sf._44a	1	1		Seifhennersdorf	Lower Oligocene	Sapindaceae	Acer	Acer_angustilobum	deciduous	tree	lobed	dentate	palmate	non-looped	NA	P	P	no	no	no	no	no	no	no
SNSD, MMG_PB	Sf._58	1			Seifhennersdorf	Lower Oligocene	Sapindaceae	Acer	Acer_angustilobum	deciduous	tree	lobed	dentate	palmate	non-looped	P	P	P	no	no	no	no	no	no	no
SNSD, MMG_PB	Sf._59/8404	1			Seifhennersdorf	Lower Oligocene	Sapindaceae	Acer	Acer_angustilobum	deciduous	tree	lobed	dentate	palmate	non-looped	P	P	P	no	no	no	no	no	no	no
SNSD, MMG_PB	Sf._61	1	1	1	Seifhennersdorf	Lower Oligocene	Sapindaceae	Acer	Acer_angustilobum	deciduous	tree	lobed	dentate	palmate	non-looped	P	P	P	no	no	no	no	no	no	no
SNSD, MMG_PB	Sf._62	1	1		Seifhennersdorf	Lower Oligocene	Sapindaceae	Acer	Acer_angustilobum	deciduous	tree	lobed	dentate	palmate	non-looped	P	P	P	no	no	no	no	no	no	no
SNSD, MMG_PB	Sf._63	1			Seifhennersdorf	Lower Oligocene	Sapindaceae	Acer	Acer_angustilobum	deciduous	tree	lobed	dentate	palmate	non-looped	P	P	P	no	no	no	no	no	no	no
SNSD, MMG_PB	Sf._68	1	1		Seifhennersdorf	Lower Oligocene	Sapindaceae	Acer	Acer_angustilobum	deciduous	tree	lobed	dentate	palmate	non-looped	P	P	P	no	no	no	no	no	no	no
SNSD, MMG_PB	Sf._69	1	1		Seifhennersdorf	Lower Oligocene	Sapindaceae	Acer	Acer_angustilobum	deciduous	tree	lobed	dentate	palmate	non-looped	P	P	P	no	no	no	no	no	no	no
SNSD, MMG_PB	Sf._71	1			Seifhennersdorf	Lower Oligocene	Sapindaceae	Acer	Acer_angustilobum	deciduous	tree	lobed	dentate	palmate	non-looped	P	P	P	no	no	no	no	no	no	no
SNSD, MMG_PB	Sf._73	1	1		Seifhennersdorf	Lower Oligocene	Sapindaceae	Acer	Acer_angustilobum	deciduous	tree	lobed	dentate	palmate	non-looped	P	P	P	no	no	no	no	no	no	no
SNSD, MMG_PB	Sf._80	1	1		Seifhennersdorf	Lower Oligocene	Sapindaceae	Acer	Acer_angustilobum	deciduous	tree	lobed	dentate	palmate	non-looped	NA	P	P	no	no	no	no	no	no	no
SNSD, MMG_PB	Sf._845a	1			Seifhennersdorf	Lower Oligocene	Sapindaceae	Acer	Acer_angustilobum	deciduous	tree	lobed	dentate	palmate	non-looped	P	P	P	no	no	no	no	no	no	no
SNSD, MMG_PB	Sf._953	1			Seifhennersdorf	Lower Oligocene	Sapindaceae	Acer	Acer_angustilobum	deciduous	tree	lobed	dentate	palmate	non-looped	NA	P	P	no	no	no	no	no	no	no
SNSD, MMG_PB	Sf._2991	1			Seifhennersdorf	Lower Oligocene	Sapindaceae	Acer	Acer_angustilobum	deciduous	tree	lobed	dentate	palmate	non-looped	NA	P	P	no	no	no	no	no	no	no
SNSD, MMG_PB	Sf._2994	1			Seifhennersdorf	Lower Oligocene	Sapindaceae	Acer	Acer_angustilobum	deciduous	tree	lobed	dentate	palmate	non-looped	NA	P	P	no	no	no	no	no	no	no
SNSD, MMG_PB	Sf._2995	1			Seifhennersdorf	Lower Oligocene	Sapindaceae	Acer	Acer_angustilobum	deciduous	tree	lobed	dentate	palmate	non-looped	NA	P	P	no	no	no	no	no	no	no
SNSD, MMG_PB	Sf._3002	1			Seifhennersdorf	Lower Oligocene	Sapindaceae	Acer	Acer_angustilobum	deciduous	tree	lobed	dentate	palmate	non-looped	P	P	P	no	no	no	no	no	no	no
SNSD, MMG_PB	Sf._3005:1,2	1			Seifhennersdorf	Lower Oligocene	Sapindaceae	Acer	Acer_angustilobum	deciduous	tree	lobed	dentate	palmate	non-looped	NA	P	P	no	no	no	no	no	no	no
SNSD, MMG_PB	Sf._3006	1			Seifhennersdorf	Lower Oligocene	Sapindaceae	Acer	Acer_angustilobum	deciduous	tree	lobed	dentate	palmate	non-looped	P	P	P	no	no	no	no	no	no	no
SNSD, MMG_PB	Sf._3008	1			Seifhennersdorf	Lower Oligocene	Sapindaceae	Acer	Acer_angustilobum	deciduous	tree	lobed	dentate	palmate	non-looped	P	P	P	no	no	no	no	no	no	no
SNSD, MMG_PB	Sf._3011	1			Seifhennersdorf	Lower Oligocene	Sapindaceae	Acer	Acer_angustilobum	deciduous	tree	lobed	dentate	palmate	non-looped	P	P	P	no	no	no	no	no	no	no
SNSD, MMG_PB	Sf._3014	1			Seifhennersdorf	Lower Oligocene	Sapindaceae	Acer	Acer_angustilobum	deciduous	tree	lobed	dentate	palmate	non-looped	P	P	P	no	no	no	no	no	no	no
SNSD, MMG_PB	Sf._3015:1,2	1			Seifhennersdorf	Lower Oligocene	Sapindaceae	Acer	Acer_angustilobum	deciduous	tree	lobed	dentate	palmate	non-looped	P	P	P	no	no	no	no	no	no	no
SNSD, MMG_PB	Sf._3030	1			Seifhennersdorf	Lower Oligocene	Sapindaceae	Acer	Acer_angustilobum	deciduous	tree	lobed	dentate	palmate	non-looped	P	P	P	no	no	no	no	no	no	no
SNSD, MMG_PB	Sf._3031:1,2	1			Seifhennersdorf	Lower Oligocene	Sapindaceae	Acer	Acer_angustilobum	deciduous	tree	lobed	dentate	palmate	non-looped	P	P	P	no	no	no	no	no	no	no
SNSD, MMG_PB	Sf._3038a	1			Seifhennersdorf	Lower Oligocene	Sapindaceae	Acer	Acer_angustilobum	deciduous	tree	lobed	dentate	palmate	non-looped	NA	P	P	no	no	no	no	no	no	no
SNSD, MMG_PB	Sf._3040/2352	1			Seifhennersdorf	Lower Oligocene	Sapindaceae	Acer	Acer_angustilobum	deciduous	tree	lobed	dentate	palmate	non-looped	P	P	P	no	no	no	no	no	no	no
SNSD, MMG_PB	Sf._3045:1,2	1			Seifhennersdorf	Lower Oligocene	Sapindaceae	Acer	Acer_angustilobum	deciduous	tree	lobed	dentate	palmate	non-looped	P	P	P	no	no	no	no	no	no	no
SNSD, MMG_PB	Sf._3047:1,2	1			Seifhennersdorf	Lower Oligocene	Sapindaceae	Acer	Acer_angustilobum	deciduous	tree	lobed	dentate	palmate	non-looped	P	P	P	no	no	no	no	no	no	no
SNSD, MMG_PB	Sf._3052	1			Seifhennersdorf	Lower Oligocene	Sapindaceae	Acer	Acer_angustilobum	deciduous	tree	lobed	dentate	palmate	non-looped	NA	P	P	no	no	no	no	no	no	no
SNSD, MMG_PB	Sf._3053	1			Seifhennersdorf	Lower Oligocene	Sapindaceae	Acer	Acer_angustilobum	deciduous	tree	lobed	dentate	palmate	non-looped	P	P	P	no	no	no	no	no	no	no
SNSD, MMG_PB	Sf._3056/3039	1			Seifhennersdorf	Lower Oligocene	Sapindaceae	Acer	Acer_angustilobum	deciduous	tree	lobed	dentate	palmate	non-looped	P	P	P	no	no	no	no	no	no	no
SNSD, MMG_PB	Sf._3297	1			Seifhennersdorf	Lower Oligocene	Sapindaceae	Acer	Acer_angustilobum	deciduous	tree	lobed	dentate	palmate	non-looped	P	P	P	no	no	no	no	no	no	no
SNSD, MMG_PB	Sf._3329	1	1	1	Seifhennersdorf	Lower Oligocene	Sapindaceae	Acer	Acer_angustilobum	deciduous	tree	lobed	dentate	palmate	non-looped	P	P	P	no	no	no	no	no	no	no
SNSD, MMG_PB	Sf._3330:1,2	1			Seifhennersdorf	Lower Oligocene	Sapindaceae	Acer	Acer_angustilobum	deciduous	tree	lobed	dentate	palmate	non-looped	P	P	P	no	no	no	no	no	no	no
SNSD, MMG_PB	Sf._3505:1,2	1			Seifhennersdorf	Lower Oligocene	Sapindaceae	Acer	Acer_angustilobum	deciduous	tree	lobed	dentate	palmate	non-looped	NA	P	P	no	no	no	no	no	no	no
SNSD, MMG_PB	Sf._3524	1			Seifhennersdorf	Lower Oligocene	Sapindaceae	Acer	Acer_angustilobum	deciduous	tree	lobed	dentate	palmate	non-looped	NA	P	P	no	no	no	no	no	no	no
SNSD, MMG_PB	Sf._3714:1,2	1			Seifhennersdorf	Lower Oligocene	Sapindaceae	Acer	Acer_angustilobum	deciduous	tree	lobed	dentate	palmate	non-looped	P	P	P	no	no	no	no	no	no	no
SNSD, MMG_PB	Sf._3746:1,2	1			Seifhennersdorf	Lower Oligocene	Sapindaceae	Acer	Acer_angustilobum	deciduous	tree	lobed	dentate	palmate	non-looped	P	P	P	no	no	no	no	no	no	no
SNSD, MMG_PB	Sf._3755:1,2	1			Seifhennersdorf	Lower Oligocene	Sapindaceae	Acer	Acer_angustilobum	deciduous	tree	lobed	dentate	palmate	non-looped	P	P	P	no	no	no	no	no	no	no
SNSD, MMG_PB	Sf._3766	1			Seifhennersdorf	Lower Oligocene	Sapindaceae	Acer	Acer_angustilobum	deciduous	tree	lobed	dentate	palmate	non-looped	P	P	P	no	no	no	no	no	no	no
SNSD, MMG_PB	Sf._3768	1			Seifhennersdorf	Lower Oligocene	Sapindaceae	Acer	Acer_angustilobum	deciduous	tree	lobed	dentate	palmate	non-looped	P	P	P	no	no	no	no	no	no	no
SNSD, MMG_PB	Sf._4050:1,2	1			Seifhennersdorf	Lower Oligocene	Sapindaceae	Acer	Acer_angustilobum	deciduous	tree	lobed	dentate	palmate	non-looped	NA	P	P	no	no	no	no	no	no	no
SNSD, MMG_PB	Sf._4072	1			Seifhennersdorf	Lower Oligocene	Sapindaceae	Acer	Acer_angustilobum	deciduous	tree	lobed	dentate	palmate	non-looped	P	P	P	no	no	no	no	no	no	no
SNSD, MMG_PB	Sf._4120/4124	1	1	1	Seifhennersdorf	Lower Oligocene	Sapindaceae	Acer	Acer_angustilobum	deciduous	tree	lobed	dentate	palmate	non-looped	P	P	P	no	no	no	no	no	no	no
SNSD, MMG_PB	Sf._4132	1			Seifhennersdorf	Lower Oligocene	Sapindaceae	Acer	Acer_angustilobum	deciduous	tree	lobed	dentate	palmate	non-looped	P	P	P	no	no	no	no	no	no	no
SNSD, MMG_PB	Sf._4189:1,2	1			Seifhennersdorf	Lower Oligocene	Sapindaceae	Acer	Acer_angustilobum	deciduous	tree	lobed	dentate	palmate	non-looped	P	P	P	no	no	no	no	no	no	no
SNSD, MMG_PB	Sf._4203	1			Seifhennersdorf	Lower Oligocene	Sapindaceae	Acer	Acer_angustilobum	deciduous	tree	lobed	dentate	palmate	non-looped	NA	P	P	no	no	no	no	no	no	no
SNSD, MMG_PB	Sf._4225	1			Seifhennersdorf	Lower Oligocene	Sapindaceae	Acer	Acer_angustilobum	deciduous	tree	lobed	dentate	palmate	non-looped	NA	P	P	no	no	no	no	no	no	no
SNSD, MMG_PB	Sf._4404a	1	1	1	Seifhennersdorf	Lower Oligocene	Sapindaceae	Acer	Acer_angustilobum	deciduous	tree	lobed	dentate	palmate	non-looped	P	P	P	no	no	no	no	no	no	no
SNSD, MMG_PB	Sf._4404b	1			Seifhennersdorf	Lower Oligocene	Sapindaceae	Acer	Acer_angustilobum	deciduous	tree	lobed	dentate	palmate	non-looped	P	P	P	no	no	no	no	no	no	no
SNSD, MMG_PB	Sf._4418	1			Seifhennersdorf	Lower Oligocene	Sapindaceae	Acer	Acer_angustilobum	deciduous	tree	lobed	dentate	palmate	non-looped	NA	P	P	no	no	no	no	no	no	no
SNSD, MMG_PB	Sf._4461/4670a	1	1	1	Seifhennersdorf	Lower Oligocene	Sapindaceae	Acer	Acer_angustilobum	deciduous	tree	lobed	dentate	palmate	non-looped	P	P	P	no	no	no	no	no	no	no
SNSD, MMG_PB	Sf._4468	1			Seifhennersdorf	Lower Oligocene	Sapindaceae	Acer	Acer_angustilobum	deciduous	tree	lobed	dentate	palmate	non-looped	P	P	P	yes	no	yes	no	no	no	no	12
SNSD, MMG_PB	Sf._4470	1			Seifhennersdorf	Lower Oligocene	Sapindaceae	Acer	Acer_angustilobum	deciduous	tree	lobed	dentate	palmate	non-looped	NA	P	P	no	no	no	no	no	no	no
SNSD, MMG_PB	Sf._4476	1			Seifhennersdorf	Lower Oligocene	Sapindaceae	Acer	Acer_angustilobum	deciduous	tree	lobed	dentate	palmate	non-looped	P	P	P	no	no	no	no	no	no	no
SNSD, MMG_PB	Sf._4478	1	1	1	Seifhennersdorf	Lower Oligocene	Sapindaceae	Acer	Acer_angustilobum	deciduous	tree	lobed	dentate	palmate	non-looped	P	P	P	no	no	no	no	no	no	no
SNSD, MMG_PB	Sf._4480:1,2	1			Seifhennersdorf	Lower Oligocene	Sapindaceae	Acer	Acer_angustilobum	deciduous	tree	lobed	dentate	palmate	non-looped	P	P	P	no	no	no	no	no	no	no
SNSD, MMG_PB	Sf._4484	1			Seifhennersdorf	Lower Oligocene	Sapindaceae	Acer	Acer_angustilobum	deciduous	tree	lobed	dentate	palmate	non-looped	P	P	P	no	no	no	no	no	no	no
SNSD, MMG_PB	Sf._4492/4496	1	1	1	Seifhennersdorf	Lower Oligocene	Sapindaceae	Acer	Acer_angustilobum	deciduous	tree	lobed	dentate	palmate	non-looped	P	P	P	no	no	no	no	no	no	no
SNSD, MMG_PB	Sf._4495	1	1	1	Seifhennersdorf	Lower Oligocene	Sapindaceae	Acer	Acer_angustilobum	deciduous	tree	lobed	dentate	palmate	non-looped	P	P	P	no	no	no	no	no	no	no
SNSD, MMG_PB	Sf._4497	1	1	1	Seifhennersdorf	Lower Oligocene	Sapindaceae	Acer	Acer_angustilobum	deciduous	tree	lobed	dentate	palmate	non-looped	P	P	P	no	no	no	no	no	no	no
SNSD, MMG_PB	Sf._4503:1,2a	1	1	1	Seifhennersdorf	Lower Oligocene	Sapindaceae	Acer	Acer_angustilobum	deciduous	tree	lobed	dentate	palmate	non-looped	P	P	P	no	no	no	no	no	no	no
SNSD, MMG_PB	Sf._4504/4487a	1			Seifhennersdorf	Lower Oligocene	Sapindaceae	Acer	Acer_angustilobum	deciduous	tree	lobed	dentate	palmate	non-looped	P	P	P	no	no	no	no	no	no	no
SNSD, MMG_PB	Sf._4504/4487b	1			Seifhennersdorf	Lower Oligocene	Sapindaceae	Acer	Acer_angustilobum	deciduous	tree	lobed	dentate	palmate	non-looped	P	P	P	no	no	no	no	no	no	no
SNSD, MMG_PB	Sf._4509b	1	1		Seifhennersdorf	Lower Oligocene	Sapindaceae	Acer	Acer_angustilobum	deciduous	tree	lobed	dentate	palmate	non-looped	P	P	P	no	no	no	no	no	no	no
SNSD, MMG_PB	Sf._4511:1,2	1	1	1	Seifhennersdorf	Lower Oligocene	Sapindaceae	Acer	Acer_angustilobum	deciduous	tree	lobed	dentate	palmate	non-looped	P	P	P	no	no	no	no	no	no	no
SNSD, MMG_PB	Sf._4518	1			Seifhennersdorf	Lower Oligocene	Sapindaceae	Acer	Acer_angustilobum	deciduous	tree	lobed	dentate	palmate	non-looped	NA	P	P	no	no	no	no	no	no	no
SNSD, MMG_PB	Sf._4519	1			Seifhennersdorf	Lower Oligocene	Sapindaceae	Acer	Acer_angustilobum	deciduous	tree	lobed	dentate	palmate	non-looped	P	P	P	no	no	no	no	no	no	no
SNSD, MMG_PB	Sf._4522	1			Seifhennersdorf	Lower Oligocene	Sapindaceae	Acer	Acer_angustilobum	deciduous	tree	lobed	dentate	palmate	non-looped	P	P	P	no	no	no	no	no	no	no
SNSD, MMG_PB	Sf._4523	1	1	1	Seifhennersdorf	Lower Oligocene	Sapindaceae	Acer	Acer_angustilobum	deciduous	tree	lobed	dentate	palmate	non-looped	P	P	P	no	no	no	no	no	no	no
SNSD, MMG_PB	Sf._4532	1			Seifhennersdorf	Lower Oligocene	Sapindaceae	Acer	Acer_angustilobum	deciduous	tree	lobed	dentate	palmate	non-looped	P	P	P	no	no	no	no	no	no	no
SNSD, MMG_PB	Sf._4536	1			Seifhennersdorf	Lower Oligocene	Sapindaceae	Acer	Acer_angustilobum	deciduous	tree	lobed	dentate	palmate	non-looped	P	P	P	no	no	no	no	no	no	no
SNSD, MMG_PB	Sf._4538	1			Seifhennersdorf	Lower Oligocene	Sapindaceae	Acer	Acer_angustilobum	deciduous	tree	lobed	dentate	palmate	non-looped	P	P	P	no	no	no	no	no	no	no
SNSD, MMG_PB	Sf._4561	1			Seifhennersdorf	Lower Oligocene	Sapindaceae	Acer	Acer_angustilobum	deciduous	tree	lobed	dentate	palmate	non-looped	P	P	P	no	no	no	no	no	no	no
SNSD, MMG_PB	Sf._4564	1			Seifhennersdorf	Lower Oligocene	Sapindaceae	Acer	Acer_angustilobum	deciduous	tree	lobed	dentate	palmate	non-looped	P	P	P	no	no	no	no	no	no	no
SNSD, MMG_PB	Sf._4565/4459	1			Seifhennersdorf	Lower Oligocene	Sapindaceae	Acer	Acer_angustilobum	deciduous	tree	lobed	dentate	palmate	non-looped	P	P	P	no	no	no	no	no	no	no
SNSD, MMG_PB	Sf._4566	1			Seifhennersdorf	Lower Oligocene	Sapindaceae	Acer	Acer_angustilobum	deciduous	tree	lobed	dentate	palmate	non-looped	P	P	P	no	no	no	no	no	no	no
SNSD, MMG_PB	Sf._4567	1			Seifhennersdorf	Lower Oligocene	Sapindaceae	Acer	Acer_angustilobum	deciduous	tree	lobed	dentate	palmate	non-looped	P	P	P	no	no	no	no	no	no	no
SNSD, MMG_PB	Sf._4571	1			Seifhennersdorf	Lower Oligocene	Sapindaceae	Acer	Acer_angustilobum	deciduous	tree	lobed	dentate	palmate	non-looped	NA	P	P	no	no	no	no	no	no	no
SNSD, MMG_PB	Sf._4572/4560	1			Seifhennersdorf	Lower Oligocene	Sapindaceae	Acer	Acer_angustilobum	deciduous	tree	lobed	dentate	palmate	non-looped	NA	P	P	no	no	no	no	no	no	no
SNSD, MMG_PB	Sf._4574	1			Seifhennersdorf	Lower Oligocene	Sapindaceae	Acer	Acer_angustilobum	deciduous	tree	lobed	dentate	palmate	non-looped	P	P	P	no	no	no	no	no	no	no
SNSD, MMG_PB	Sf._4581	1	1	1	Seifhennersdorf	Lower Oligocene	Sapindaceae	Acer	Acer_angustilobum	deciduous	tree	lobed	dentate	palmate	non-looped	P	P	P	no	no	no	no	no	no	no
SNSD, MMG_PB	Sf._4582:1,2	1	1		Seifhennersdorf	Lower Oligocene	Sapindaceae	Acer	Acer_angustilobum	deciduous	tree	lobed	dentate	palmate	non-looped	P	P	P	no	no	no	no	no	no	no
SNSD, MMG_PB	Sf._4585	1	1		Seifhennersdorf	Lower Oligocene	Sapindaceae	Acer	Acer_angustilobum	deciduous	tree	lobed	dentate	palmate	non-looped	P	P	P	no	no	no	no	no	no	no
SNSD, MMG_PB	Sf._4589/4578	1	1	1	Seifhennersdorf	Lower Oligocene	Sapindaceae	Acer	Acer_angustilobum	deciduous	tree	lobed	dentate	palmate	non-looped	P	P	P	no	no	no	no	no	no	no
SNSD, MMG_PB	Sf._4595	1			Seifhennersdorf	Lower Oligocene	Sapindaceae	Acer	Acer_angustilobum	deciduous	tree	lobed	dentate	palmate	non-looped	NA	P	P	no	no	no	no	no	no	no
SNSD, MMG_PB	Sf._4598	1			Seifhennersdorf	Lower Oligocene	Sapindaceae	Acer	Acer_angustilobum	deciduous	tree	lobed	dentate	palmate	non-looped	P	P	P	no	no	no	no	no	no	no
SNSD, MMG_PB	Sf._4600	1			Seifhennersdorf	Lower Oligocene	Sapindaceae	Acer	Acer_angustilobum	deciduous	tree	lobed	dentate	palmate	non-looped	P	P	P	no	no	no	no	no	no	no
SNSD, MMG_PB	Sf._4601	1			Seifhennersdorf	Lower Oligocene	Sapindaceae	Acer	Acer_angustilobum	deciduous	tree	lobed	dentate	palmate	non-looped	P	P	P	no	no	no	no	no	no	no
SNSD, MMG_PB	Sf._4603a	1			Seifhennersdorf	Lower Oligocene	Sapindaceae	Acer	Acer_angustilobum	deciduous	tree	lobed	dentate	palmate	non-looped	NA	P	P	no	no	no	no	no	no	no
SNSD, MMG_PB	Sf._4606	1			Seifhennersdorf	Lower Oligocene	Sapindaceae	Acer	Acer_angustilobum	deciduous	tree	lobed	dentate	palmate	non-looped	P	P	P	no	no	no	no	no	no	no
SNSD, MMG_PB	Sf._4612	1			Seifhennersdorf	Lower Oligocene	Sapindaceae	Acer	Acer_angustilobum	deciduous	tree	lobed	dentate	palmate	non-looped	NA	P	P	no	no	no	no	no	no	no
SNSD, MMG_PB	Sf._4613	1			Seifhennersdorf	Lower Oligocene	Sapindaceae	Acer	Acer_angustilobum	deciduous	tree	lobed	dentate	palmate	non-looped	P	P	P	no	no	no	no	no	no	no
SNSD, MMG_PB	Sf._4624	1			Seifhennersdorf	Lower Oligocene	Sapindaceae	Acer	Acer_angustilobum	deciduous	tree	lobed	dentate	palmate	non-looped	P	P	P	no	no	no	no	no	no	no
SNSD, MMG_PB	Sf._4630	1			Seifhennersdorf	Lower Oligocene	Sapindaceae	Acer	Acer_angustilobum	deciduous	tree	lobed	dentate	palmate	non-looped	P	P	P	no	no	no	no	no	no	no
SNSD, MMG_PB	Sf._4635	1	1		Seifhennersdorf	Lower Oligocene	Sapindaceae	Acer	Acer_angustilobum	deciduous	tree	lobed	dentate	palmate	non-looped	P	P	P	no	no	no	no	no	no	no
SNSD, MMG_PB	Sf._4646	1			Seifhennersdorf	Lower Oligocene	Sapindaceae	Acer	Acer_angustilobum	deciduous	tree	lobed	dentate	palmate	non-looped	NA	P	P	no	no	no	no	no	no	no
SNSD, MMG_PB	Sf._4647	1			Seifhennersdorf	Lower Oligocene	Sapindaceae	Acer	Acer_angustilobum	deciduous	tree	lobed	dentate	palmate	non-looped	P	P	P	no	no	no	no	no	no	no
SNSD, MMG_PB	Sf._4656	1			Seifhennersdorf	Lower Oligocene	Sapindaceae	Acer	Acer_angustilobum	deciduous	tree	lobed	dentate	palmate	non-looped	NA	P	P	no	no	no	no	no	no	no
SNSD, MMG_PB	Sf._4662	1			Seifhennersdorf	Lower Oligocene	Sapindaceae	Acer	Acer_angustilobum	deciduous	tree	lobed	dentate	palmate	non-looped	P	P	P	no	no	no	no	no	no	no
SNSD, MMG_PB	Sf._4672/4607	1	1	1	Seifhennersdorf	Lower Oligocene	Sapindaceae	Acer	Acer_angustilobum	deciduous	tree	lobed	dentate	palmate	non-looped	P	P	P	no	no	no	no	no	no	no
SNSD, MMG_PB	Sf._4679	1			Seifhennersdorf	Lower Oligocene	Sapindaceae	Acer	Acer_angustilobum	deciduous	tree	lobed	dentate	palmate	non-looped	NA	P	P	no	no	no	no	no	no	no
SNSD, MMG_PB	Sf._7833:1,2	1			Seifhennersdorf	Lower Oligocene	Sapindaceae	Acer	Acer_angustilobum	deciduous	tree	lobed	dentate	palmate	non-looped	P	P	P	no	no	no	no	no	no	no
SNSD, MMG_PB	Sf._8138:1,2	1	1	1	Seifhennersdorf	Lower Oligocene	Sapindaceae	Acer	Acer_angustilobum	deciduous	tree	lobed	dentate	palmate	non-looped	P	P	P	no	no	no	no	no	no	no
SNSD, MMG_PB	Sf._8140	1			Seifhennersdorf	Lower Oligocene	Sapindaceae	Acer	Acer_angustilobum	deciduous	tree	lobed	dentate	palmate	non-looped	P	P	P	no	no	no	no	no	no	no
SNSD, MMG_PB	Sf._8141:1,2	1			Seifhennersdorf	Lower Oligocene	Sapindaceae	Acer	Acer_angustilobum	deciduous	tree	lobed	dentate	palmate	non-looped	P	P	P	no	no	no	no	no	no	no
SNSD, MMG_PB	Sf._8143:1,2	1			Seifhennersdorf	Lower Oligocene	Sapindaceae	Acer	Acer_angustilobum	deciduous	tree	lobed	dentate	palmate	non-looped	P	P	P	no	no	no	no	no	no	no
SNSD, MMG_PB	Sf._8162	1			Seifhennersdorf	Lower Oligocene	Sapindaceae	Acer	Acer_angustilobum	deciduous	tree	lobed	dentate	palmate	non-looped	NA	P	P	no	no	no	no	no	no	no
SNSD, MMG_PB	Sf._8164:1,2	1	1		Seifhennersdorf	Lower Oligocene	Sapindaceae	Acer	Acer_angustilobum	deciduous	tree	lobed	dentate	palmate	non-looped	P	P	P	no	no	no	no	no	no	no
SNSD, MMG_PB	Sf._8165:1,2	1			Seifhennersdorf	Lower Oligocene	Sapindaceae	Acer	Acer_angustilobum	deciduous	tree	lobed	dentate	palmate	non-looped	P	P	P	no	no	no	no	no	no	no
SNSD, MMG_PB	Sf._8168	1			Seifhennersdorf	Lower Oligocene	Sapindaceae	Acer	Acer_angustilobum	deciduous	tree	lobed	dentate	palmate	non-looped	NA	P	P	no	no	no	no	no	no	no
SNSD, MMG_PB	Sf._8169	1			Seifhennersdorf	Lower Oligocene	Sapindaceae	Acer	Acer_angustilobum	deciduous	tree	lobed	dentate	palmate	non-looped	P	P	P	no	no	no	no	no	no	no
SNSD, MMG_PB	Sf._8171:1,2	1	1		Seifhennersdorf	Lower Oligocene	Sapindaceae	Acer	Acer_angustilobum	deciduous	tree	lobed	dentate	palmate	non-looped	P	P	P	no	no	no	no	no	no	no
SNSD, MMG_PB	Sf._8172:1,2	1	1		Seifhennersdorf	Lower Oligocene	Sapindaceae	Acer	Acer_angustilobum	deciduous	tree	lobed	dentate	palmate	non-looped	P	P	P	no	no	no	no	no	no	no
SNSD, MMG_PB	Sf._8173:1,2	1			Seifhennersdorf	Lower Oligocene	Sapindaceae	Acer	Acer_angustilobum	deciduous	tree	lobed	dentate	palmate	non-looped	P	P	P	no	no	no	no	no	no	no
SNSD, MMG_PB	Sf._8174	1			Seifhennersdorf	Lower Oligocene	Sapindaceae	Acer	Acer_angustilobum	deciduous	tree	lobed	dentate	palmate	non-looped	P	P	P	no	no	no	no	no	no	no
SNSD, MMG_PB	Sf._8176 (I):1,2	1			Seifhennersdorf	Lower Oligocene	Sapindaceae	Acer	Acer_angustilobum	deciduous	tree	lobed	dentate	palmate	non-looped	NA	P	P	no	no	no	no	no	no	no
SNSD, MMG_PB	Sf._8194:1,2	1			Seifhennersdorf	Lower Oligocene	Sapindaceae	Acer	Acer_angustilobum	deciduous	tree	lobed	dentate	palmate	non-looped	P	P	P	no	no	no	no	no	no	no
SNSD, MMG_PB	Sf._8203	1	1	1	Seifhennersdorf	Lower Oligocene	Sapindaceae	Acer	Acer_angustilobum	deciduous	tree	lobed	dentate	palmate	non-looped	P	P	P	no	no	no	no	no	no	no
SNSD, MMG_PB	Sf._8233:1,2b	1	1	1	Seifhennersdorf	Lower Oligocene	Sapindaceae	Acer	Acer_angustilobum	deciduous	tree	lobed	dentate	palmate	non-looped	P	P	P	no	no	no	no	no	no	no
SNSD, MMG_PB	Sf._8350:1,2	1			Seifhennersdorf	Lower Oligocene	Sapindaceae	Acer	Acer_angustilobum	deciduous	tree	lobed	dentate	palmate	non-looped	P	P	P	no	no	no	no	no	no	no
SNSD, MMG_PB	Sf._8353	1	1	1	Seifhennersdorf	Lower Oligocene	Sapindaceae	Acer	Acer_angustilobum	deciduous	tree	lobed	dentate	palmate	non-looped	P	P	P	no	no	no	no	no	no	no
SNSD, MMG_PB	Sf._8358	1			Seifhennersdorf	Lower Oligocene	Sapindaceae	Acer	Acer_angustilobum	deciduous	tree	lobed	dentate	palmate	non-looped	P	P	P	no	no	no	no	no	no	no
SNSD, MMG_PB	Sf._8359	1			Seifhennersdorf	Lower Oligocene	Sapindaceae	Acer	Acer_angustilobum	deciduous	tree	lobed	dentate	palmate	non-looped	P	P	P	no	no	no	no	no	no	no
SNSD, MMG_PB	Sf._8360	1	1		Seifhennersdorf	Lower Oligocene	Sapindaceae	Acer	Acer_angustilobum	deciduous	tree	lobed	dentate	palmate	non-looped	P	P	P	yes	no	no	no	no	yes	no	32
SNSD, MMG_PB	Sf._8361	1			Seifhennersdorf	Lower Oligocene	Sapindaceae	Acer	Acer_angustilobum	deciduous	tree	lobed	dentate	palmate	non-looped	P	P	P	no	no	no	no	no	no	no
SNSD, MMG_PB	Sf._8363	1			Seifhennersdorf	Lower Oligocene	Sapindaceae	Acer	Acer_angustilobum	deciduous	tree	lobed	dentate	palmate	non-looped	P	P	P	no	no	no	no	no	no	no
SNSD, MMG_PB	Sf._8364	1	1		Seifhennersdorf	Lower Oligocene	Sapindaceae	Acer	Acer_angustilobum	deciduous	tree	lobed	dentate	palmate	non-looped	P	P	P	no	no	no	no	no	no	no
SNSD, MMG_PB	Sf._8365	1	1		Seifhennersdorf	Lower Oligocene	Sapindaceae	Acer	Acer_angustilobum	deciduous	tree	lobed	dentate	palmate	non-looped	P	P	P	no	no	no	no	no	no	no
SNSD, MMG_PB	Sf._8384	1			Seifhennersdorf	Lower Oligocene	Sapindaceae	Acer	Acer_angustilobum	deciduous	tree	lobed	dentate	palmate	non-looped	P	P	P	no	no	no	no	no	no	no
SNSD, MMG_PB	Sf._8419	1			Seifhennersdorf	Lower Oligocene	Sapindaceae	Acer	Acer_angustilobum	deciduous	tree	lobed	dentate	palmate	non-looped	NA	P	P	no	no	no	no	no	no	no
SNSD, MMG_PB	Sf._8631:1,2	1			Seifhennersdorf	Lower Oligocene	Sapindaceae	Acer	Acer_angustilobum	deciduous	tree	lobed	dentate	palmate	non-looped	NA	P	P	no	no	no	no	no	no	no
SNSD, MMG_PB	Sf._8662a	1	1	1	Seifhennersdorf	Lower Oligocene	Sapindaceae	Acer	Acer_angustilobum	deciduous	tree	lobed	dentate	palmate	non-looped	P	P	P	no	no	no	no	no	no	no
SNSD, MMG_PB	Sf._3028:1,2	1			Seifhennersdorf	Lower Oligocene	Sapindaceae	Acer	Acer_cfdasycarpoides	deciduous	tree	lobed	dentate	palmate	non-looped	NA	P	P	no	no	no	no	no	no	no
SNSD, MMG_PB	Sf._3693:1,2	1			Seifhennersdorf	Lower Oligocene	Sapindaceae	Acer	Acer_cfdasycarpoides	deciduous	tree	lobed	dentate	palmate	non-looped	P	P	P	no	no	no	no	no	no	no
SNSD, MMG_PB	Sf._4071	1			Seifhennersdorf	Lower Oligocene	Sapindaceae	Acer	Acer_cfdasycarpoides	deciduous	tree	lobed	dentate	palmate	non-looped	P	P	P	no	no	no	no	no	no	no
SNSD, MMG_PB	Sf._4118	1	1	1	Seifhennersdorf	Lower Oligocene	Sapindaceae	Acer	Acer_cfdasycarpoides	deciduous	tree	lobed	dentate	palmate	non-looped	P	P	P	no	no	no	no	no	no	no
SNSD, MMG_PB	Sf._4121	1	1		Seifhennersdorf	Lower Oligocene	Sapindaceae	Acer	Acer_cfdasycarpoides	deciduous	tree	lobed	dentate	palmate	non-looped	P	P	P	no	no	no	no	no	no	no
SNSD, MMG_PB	Sf._4460	1			Seifhennersdorf	Lower Oligocene	Sapindaceae	Acer	Acer_cfdasycarpoides	deciduous	tree	lobed	dentate	palmate	non-looped	P	P	P	no	no	no	no	no	no	no
SNSD, MMG_PB	Sf._4599	1	1		Seifhennersdorf	Lower Oligocene	Sapindaceae	Acer	Acer_cfdasycarpoides	deciduous	tree	lobed	dentate	palmate	non-looped	P	P	P	no	no	no	no	no	no	no
SNSD, MMG_PB	Sf._7641	1			Seifhennersdorf	Lower Oligocene	Sapindaceae	Acer	Acer_cfdasycarpoides	deciduous	tree	lobed	dentate	palmate	non-looped	P	P	P	no	no	no	no	no	no	no
SNSD, MMG_PB	Sf._8247	1			Seifhennersdorf	Lower Oligocene	Sapindaceae	Acer	Acer_cfdasycarpoides	deciduous	tree	lobed	dentate	palmate	non-looped	P	P	P	no	no	no	no	no	no	no
SNSD, MMG_PB	Sf._8 (II)	1			Seifhennersdorf	Lower Oligocene	Sapindaceae	Acer	Acer_cftricuspidatum	deciduous	tree	lobed	dentate	palmate	non-looped	P	P	P	no	no	no	no	no	no	no
SNSD, MMG_PB	Sf._16:1,2	1			Seifhennersdorf	Lower Oligocene	Sapindaceae	Acer	Acer_cftricuspidatum	deciduous	tree	lobed	dentate	palmate	non-looped	P	P	P	no	no	no	no	no	no	no
SNSD, MMG_PB	Sf._18	1	1	1	Seifhennersdorf	Lower Oligocene	Sapindaceae	Acer	Acer_cftricuspidatum	deciduous	tree	lobed	dentate	palmate	non-looped	P	P	P	yes	yes	no	no	no	no	no	2
SNSD, MMG_PB	Sf._21	1			Seifhennersdorf	Lower Oligocene	Sapindaceae	Acer	Acer_cftricuspidatum	deciduous	tree	lobed	dentate	palmate	non-looped	P	P	P	no	no	no	no	no	no	no
SNSD, MMG_PB	Sf._30	1	1	1	Seifhennersdorf	Lower Oligocene	Sapindaceae	Acer	Acer_cftricuspidatum	deciduous	tree	lobed	dentate	palmate	non-looped	P	P	P	no	no	no	no	no	no	no
SNSD, MMG_PB	Sf._31	1	1		Seifhennersdorf	Lower Oligocene	Sapindaceae	Acer	Acer_cftricuspidatum	deciduous	tree	lobed	dentate	palmate	non-looped	P	P	P	no	no	no	no	no	no	no
SNSD, MMG_PB	Sf. 36:1,2	1	1	1	Seifhennersdorf	Lower Oligocene	Sapindaceae	Acer	Acer_cftricuspidatum	deciduous	tree	lobed	dentate	palmate	non-looped	P	P	P	no	no	no	no	no	no	no
SNSD, MMG_PB	Sf._37:1,2	1	1		Seifhennersdorf	Lower Oligocene	Sapindaceae	Acer	Acer_cftricuspidatum	deciduous	tree	lobed	dentate	palmate	non-looped	P	P	P	no	no	no	no	no	no	no
SNSD, MMG_PB	Sf._38	1	1	1	Seifhennersdorf	Lower Oligocene	Sapindaceae	Acer	Acer_cftricuspidatum	deciduous	tree	lobed	dentate	palmate	non-looped	P	P	P	no	no	no	no	no	no	no
SNSD, MMG_PB	Sf._39	1			Seifhennersdorf	Lower Oligocene	Sapindaceae	Acer	Acer_cftricuspidatum	deciduous	tree	lobed	dentate	palmate	non-looped	P	P	P	no	no	no	no	no	no	no
SNSD, MMG_PB	Sf._41	1	1	1	Seifhennersdorf	Lower Oligocene	Sapindaceae	Acer	Acer_cftricuspidatum	deciduous	tree	lobed	dentate	palmate	non-looped	P	P	P	no	no	no	no	no	no	no
SNSD, MMG_PB	Sf._45	1	1	1	Seifhennersdorf	Lower Oligocene	Sapindaceae	Acer	Acer_cftricuspidatum	deciduous	tree	lobed	dentate	palmate	non-looped	P	P	P	no	no	no	no	no	no	no
SNSD, MMG_PB	Sf._46	1			Seifhennersdorf	Lower Oligocene	Sapindaceae	Acer	Acer_cftricuspidatum	deciduous	tree	lobed	dentate	palmate	non-looped	P	P	P	no	no	no	no	no	no	no
SNSD, MMG_PB	Sf._49/48	1	1	1	Seifhennersdorf	Lower Oligocene	Sapindaceae	Acer	Acer_cftricuspidatum	deciduous	tree	lobed	dentate	palmate	non-looped	P	P	P	no	no	no	no	no	no	no
SNSD, MMG_PB	Sf._52	1	1		Seifhennersdorf	Lower Oligocene	Sapindaceae	Acer	Acer_cftricuspidatum	deciduous	tree	lobed	dentate	palmate	non-looped	P	P	P	no	no	no	no	no	no	no
SNSD, MMG_PB	Sf._60	1			Seifhennersdorf	Lower Oligocene	Sapindaceae	Acer	Acer_cftricuspidatum	deciduous	tree	lobed	dentate	palmate	non-looped	P	P	P	no	no	no	no	no	no	no
SNSD, MMG_PB	Sf._72	1			Seifhennersdorf	Lower Oligocene	Sapindaceae	Acer	Acer_cftricuspidatum	deciduous	tree	lobed	dentate	palmate	non-looped	P	P	P	no	no	no	no	no	no	no
SNSD, MMG_PB	Sf._82a	1			Seifhennersdorf	Lower Oligocene	Sapindaceae	Acer	Acer_cftricuspidatum	deciduous	tree	lobed	dentate	palmate	non-looped	NA	P	P	no	no	no	no	no	no	no
SNSD, MMG_PB	Sf._82b	1	1	1	Seifhennersdorf	Lower Oligocene	Sapindaceae	Acer	Acer_cftricuspidatum	deciduous	tree	lobed	dentate	palmate	non-looped	P	P	P	no	no	no	no	no	no	no
SNSD, MMG_PB	Sf._1372:1,2	1			Seifhennersdorf	Lower Oligocene	Sapindaceae	Acer	Acer_cftricuspidatum	deciduous	tree	lobed	dentate	palmate	non-looped	P	P	P	no	no	no	no	no	no	no
SNSD, MMG_PB	Sf._2842b	1	1		Seifhennersdorf	Lower Oligocene	Sapindaceae	Acer	Acer_cftricuspidatum	deciduous	tree	lobed	dentate	palmate	non-looped	P	P	P	no	no	no	no	no	no	no
SNSD, MMG_PB	Sf._3022	1	1	1	Seifhennersdorf	Lower Oligocene	Sapindaceae	Acer	Acer_cftricuspidatum	deciduous	tree	lobed	dentate	palmate	non-looped	P	P	P	no	no	no	no	no	no	no
SNSD, MMG_PB	Sf._3029	1			Seifhennersdorf	Lower Oligocene	Sapindaceae	Acer	Acer_cftricuspidatum	deciduous	tree	lobed	dentate	palmate	non-looped	NA	P	P	no	no	no	no	no	no	no
SNSD, MMG_PB	Sf._3032	1			Seifhennersdorf	Lower Oligocene	Sapindaceae	Acer	Acer_cftricuspidatum	deciduous	tree	lobed	dentate	palmate	non-looped	P	P	P	no	no	no	no	no	no	no
SNSD, MMG_PB	Sf._3042	1	1		Seifhennersdorf	Lower Oligocene	Sapindaceae	Acer	Acer_cftricuspidatum	deciduous	tree	lobed	dentate	palmate	non-looped	P	P	P	no	no	no	no	no	no	no
SNSD, MMG_PB	Sf._3050	1	1		Seifhennersdorf	Lower Oligocene	Sapindaceae	Acer	Acer_cftricuspidatum	deciduous	tree	lobed	dentate	palmate	non-looped	P	P	P	no	no	no	no	no	no	no
SNSD, MMG_PB	Sf._3123	1			Seifhennersdorf	Lower Oligocene	Sapindaceae	Acer	Acer_cftricuspidatum	deciduous	tree	lobed	dentate	palmate	non-looped	P	P	P	no	no	no	no	no	no	no
SNSD, MMG_PB	Sf._3696:1,2	1			Seifhennersdorf	Lower Oligocene	Sapindaceae	Acer	Acer_cftricuspidatum	deciduous	tree	lobed	dentate	palmate	non-looped	P	P	P	no	no	no	no	no	no	no
SNSD, MMG_PB	Sf._3712:1,2	1			Seifhennersdorf	Lower Oligocene	Sapindaceae	Acer	Acer_cftricuspidatum	deciduous	tree	lobed	dentate	palmate	non-looped	P	P	P	no	no	no	no	no	no	no
SNSD, MMG_PB	Sf._3717:1,2	1			Seifhennersdorf	Lower Oligocene	Sapindaceae	Acer	Acer_cftricuspidatum	deciduous	tree	lobed	dentate	palmate	non-looped	P	P	P	no	no	no	no	no	no	no
SNSD, MMG_PB	Sf._3718:1,2	1			Seifhennersdorf	Lower Oligocene	Sapindaceae	Acer	Acer_cftricuspidatum	deciduous	tree	lobed	dentate	palmate	non-looped	NA	P	P	no	no	no	no	no	no	no
SNSD, MMG_PB	Sf._3735	1	1	1	Seifhennersdorf	Lower Oligocene	Sapindaceae	Acer	Acer_cftricuspidatum	deciduous	tree	lobed	dentate	palmate	non-looped	P	P	P	no	no	no	no	no	no	no
SNSD, MMG_PB	Sf._3760:1,2	1			Seifhennersdorf	Lower Oligocene	Sapindaceae	Acer	Acer_cftricuspidatum	deciduous	tree	lobed	dentate	palmate	non-looped	P	P	P	no	no	no	no	no	no	no
SNSD, MMG_PB	Sf._3761a	1			Seifhennersdorf	Lower Oligocene	Sapindaceae	Acer	Acer_cftricuspidatum	deciduous	tree	lobed	dentate	palmate	non-looped	P	P	P	no	no	no	no	no	no	no
SNSD, MMG_PB	Sf._4069	1	1	1	Seifhennersdorf	Lower Oligocene	Sapindaceae	Acer	Acer_cftricuspidatum	deciduous	tree	lobed	dentate	palmate	non-looped	P	P	P	no	no	no	no	no	no	no
SNSD, MMG_PB	Sf._4086	1	1	1	Seifhennersdorf	Lower Oligocene	Sapindaceae	Acer	Acer_cftricuspidatum	deciduous	tree	lobed	dentate	palmate	non-looped	P	P	P	no	no	no	no	no	no	no
SNSD, MMG_PB	Sf._4129	1	1	1	Seifhennersdorf	Lower Oligocene	Sapindaceae	Acer	Acer_cftricuspidatum	deciduous	tree	lobed	dentate	palmate	non-looped	P	P	P	yes	yes	yes	no	no	no	no	2	5	12
SNSD, MMG_PB	Sf._4142	1	1		Seifhennersdorf	Lower Oligocene	Sapindaceae	Acer	Acer_cftricuspidatum	deciduous	tree	lobed	dentate	palmate	non-looped	P	P	P	no	no	no	no	no	no	no
SNSD, MMG_PB	Sf._4402	1	1		Seifhennersdorf	Lower Oligocene	Sapindaceae	Acer	Acer_cftricuspidatum	deciduous	tree	lobed	dentate	palmate	non-looped	P	P	P	no	no	no	no	no	no	no
SNSD, MMG_PB	Sf._4403	1			Seifhennersdorf	Lower Oligocene	Sapindaceae	Acer	Acer_cftricuspidatum	deciduous	tree	lobed	dentate	palmate	non-looped	P	P	P	no	no	no	no	no	no	no
SNSD, MMG_PB	Sf._4469	1			Seifhennersdorf	Lower Oligocene	Sapindaceae	Acer	Acer_cftricuspidatum	deciduous	tree	lobed	dentate	palmate	non-looped	P	P	P	no	no	no	no	no	no	no
SNSD, MMG_PB	Sf._4494/4508	1	1	1	Seifhennersdorf	Lower Oligocene	Sapindaceae	Acer	Acer_cftricuspidatum	deciduous	tree	lobed	dentate	palmate	non-looped	P	P	P	no	no	no	no	no	no	no
SNSD, MMG_PB	Sf._4579	1	1		Seifhennersdorf	Lower Oligocene	Sapindaceae	Acer	Acer_cftricuspidatum	deciduous	tree	lobed	dentate	palmate	non-looped	P	P	P	no	no	no	no	no	no	no
SNSD, MMG_PB	Sf._4583:1,2	1	1		Seifhennersdorf	Lower Oligocene	Sapindaceae	Acer	Acer_cftricuspidatum	deciduous	tree	lobed	dentate	palmate	non-looped	P	P	P	no	no	no	no	no	no	no
SNSD, MMG_PB	Sf._4586/4591	1	1		Seifhennersdorf	Lower Oligocene	Sapindaceae	Acer	Acer_cftricuspidatum	deciduous	tree	lobed	dentate	palmate	non-looped	P	P	P	no	no	no	no	no	no	no
SNSD, MMG_PB	Sf._4592	1			Seifhennersdorf	Lower Oligocene	Sapindaceae	Acer	Acer_cftricuspidatum	deciduous	tree	lobed	dentate	palmate	non-looped	P	P	P	no	no	no	no	no	no	no
SNSD, MMG_PB	Sf._4604	1	1		Seifhennersdorf	Lower Oligocene	Sapindaceae	Acer	Acer_cftricuspidatum	deciduous	tree	lobed	dentate	palmate	non-looped	P	P	P	no	no	no	no	no	no	no
SNSD, MMG_PB	Sf._4605	1			Seifhennersdorf	Lower Oligocene	Sapindaceae	Acer	Acer_cftricuspidatum	deciduous	tree	lobed	dentate	palmate	non-looped	P	P	P	no	no	no	no	no	no	no
SNSD, MMG_PB	Sf._4626/4625	1	1	1	Seifhennersdorf	Lower Oligocene	Sapindaceae	Acer	Acer_cftricuspidatum	deciduous	tree	lobed	dentate	palmate	non-looped	P	P	P	no	no	no	no	no	no	no
SNSD, MMG_PB	Sf._4629	1			Seifhennersdorf	Lower Oligocene	Sapindaceae	Acer	Acer_cftricuspidatum	deciduous	tree	lobed	dentate	palmate	non-looped	P	P	P	no	no	no	no	no	no	no
SNSD, MMG_PB	Sf._4631	1			Seifhennersdorf	Lower Oligocene	Sapindaceae	Acer	Acer_cftricuspidatum	deciduous	tree	lobed	dentate	palmate	non-looped	P	P	P	no	no	no	no	no	no	no
SNSD, MMG_PB	Sf._4632	1			Seifhennersdorf	Lower Oligocene	Sapindaceae	Acer	Acer_cftricuspidatum	deciduous	tree	lobed	dentate	palmate	non-looped	NA	P	P	no	no	no	no	no	no	no
SNSD, MMG_PB	Sf._4651	1			Seifhennersdorf	Lower Oligocene	Sapindaceae	Acer	Acer_cftricuspidatum	deciduous	tree	lobed	dentate	palmate	non-looped	NA	P	P	no	no	no	no	no	no	no
SNSD, MMG_PB	Sf._4653	1			Seifhennersdorf	Lower Oligocene	Sapindaceae	Acer	Acer_cftricuspidatum	deciduous	tree	lobed	dentate	palmate	non-looped	P	P	P	no	no	no	no	no	no	no
SNSD, MMG_PB	Sf._4655	1			Seifhennersdorf	Lower Oligocene	Sapindaceae	Acer	Acer_cftricuspidatum	deciduous	tree	lobed	dentate	palmate	non-looped	P	P	P	no	no	no	no	no	no	no
SNSD, MMG_PB	Sf._4673/4669	1	1	1	Seifhennersdorf	Lower Oligocene	Sapindaceae	Acer	Acer_cftricuspidatum	deciduous	tree	lobed	dentate	palmate	non-looped	P	P	P	no	no	no	no	no	no	no
SNSD, MMG_PB	Sf._7887	1	1		Seifhennersdorf	Lower Oligocene	Sapindaceae	Acer	Acer_cftricuspidatum	deciduous	tree	lobed	dentate	palmate	non-looped	P	P	P	no	no	no	no	no	no	no
SNSD, MMG_PB	Sf._7888	1	1		Seifhennersdorf	Lower Oligocene	Sapindaceae	Acer	Acer_cftricuspidatum	deciduous	tree	lobed	dentate	palmate	non-looped	P	P	P	no	no	no	no	no	no	no
SNSD, MMG_PB	Sf._8139	1			Seifhennersdorf	Lower Oligocene	Sapindaceae	Acer	Acer_cftricuspidatum	deciduous	tree	lobed	dentate	palmate	non-looped	P	P	P	no	no	no	no	no	no	no
SNSD, MMG_PB	Sf._8163:1,2	1			Seifhennersdorf	Lower Oligocene	Sapindaceae	Acer	Acer_cftricuspidatum	deciduous	tree	lobed	dentate	palmate	non-looped	P	P	P	no	no	no	no	no	no	no
SNSD, MMG_PB	Sf._8183/8184	1	1		Seifhennersdorf	Lower Oligocene	Sapindaceae	Acer	Acer_cftricuspidatum	deciduous	tree	lobed	dentate	palmate	non-looped	P	P	P	no	no	no	no	no	no	no
SNSD, MMG_PB	Sf._8290	1	1	1	Seifhennersdorf	Lower Oligocene	Sapindaceae	Acer	Acer_cftricuspidatum	deciduous	tree	lobed	dentate	palmate	non-looped	P	P	P	no	no	no	no	no	no	no
SNSD, MMG_PB	Sf._8291	1	1		Seifhennersdorf	Lower Oligocene	Sapindaceae	Acer	Acer_cftricuspidatum	deciduous	tree	lobed	dentate	palmate	non-looped	P	P	P	no	no	no	no	no	no	no
SNSD, MMG_PB	Sf._8310:2	1	1		Seifhennersdorf	Lower Oligocene	Sapindaceae	Acer	Acer_cftricuspidatum	deciduous	tree	lobed	dentate	palmate	non-looped	P	P	P	no	no	no	no	no	no	no
SNSD, MMG_PB	Sf._8327	1			Seifhennersdorf	Lower Oligocene	Sapindaceae	Acer	Acer_cftricuspidatum	deciduous	tree	lobed	dentate	palmate	non-looped	P	P	P	no	no	no	no	no	no	no
SNSD, MMG_PB	Sf._8344	1			Seifhennersdorf	Lower Oligocene	Sapindaceae	Acer	Acer_cftricuspidatum	deciduous	tree	lobed	dentate	palmate	non-looped	P	P	P	no	no	no	no	no	no	no
SNSD, MMG_PB	Sf._8368:1,2	1			Seifhennersdorf	Lower Oligocene	Sapindaceae	Acer	Acer_cftricuspidatum	deciduous	tree	lobed	dentate	palmate	non-looped	P	P	P	no	no	no	no	no	no	no
SNSD, MMG_PB	Sf._8369	1			Seifhennersdorf	Lower Oligocene	Sapindaceae	Acer	Acer_cftricuspidatum	deciduous	tree	lobed	dentate	palmate	non-looped	P	P	P	no	no	no	no	no	no	no
SNSD, MMG_PB	Sf._8370	1			Seifhennersdorf	Lower Oligocene	Sapindaceae	Acer	Acer_cftricuspidatum	deciduous	tree	lobed	dentate	palmate	non-looped	P	P	P	no	no	no	no	no	no	no
SNSD, MMG_PB	Sf._8385	1	1		Seifhennersdorf	Lower Oligocene	Sapindaceae	Acer	Acer_cftricuspidatum	deciduous	tree	lobed	dentate	palmate	non-looped	P	P	P	no	no	no	no	no	no	no
SNSD, MMG_PB	Sf._8397	1			Seifhennersdorf	Lower Oligocene	Sapindaceae	Acer	Acer_cftricuspidatum	deciduous	tree	lobed	dentate	palmate	non-looped	P	P	P	no	no	no	no	no	no	no
SNSD, MMG_PB	Sf._8653	1			Seifhennersdorf	Lower Oligocene	Sapindaceae	Acer	Acer_cftricuspidatum	deciduous	tree	lobed	dentate	palmate	non-looped	P	P	P	no	no	no	no	no	no	no
SNSD, MMG_PB	Sf._8661:1,2	1			Seifhennersdorf	Lower Oligocene	Sapindaceae	Acer	Acer_cftricuspidatum	deciduous	tree	lobed	dentate	palmate	non-looped	P	P	P	no	no	no	no	no	no	no
SNSD, MMG_PB	Sf._33a	1			Seifhennersdorf	Lower Oligocene	Sapindaceae	Acer	Acer_engelhardtii	deciduous	tree	lobed	dentate	palmate	non-looped	P	P	P	no	no	no	no	no	no	no
SNSD, MMG_PB	Sf._55:1,2	1			Seifhennersdorf	Lower Oligocene	Sapindaceae	Acer	Acer_engelhardtii	deciduous	tree	lobed	dentate	palmate	non-looped	NA	P	P	no	no	no	no	no	no	no
SNSD, MMG_PB	Sf._67	1			Seifhennersdorf	Lower Oligocene	Sapindaceae	Acer	Acer_engelhardtii	deciduous	tree	lobed	dentate	palmate	non-looped	P	P	P	no	no	no	no	no	no	no
SNSD, MMG_PB	Sf._74	1			Seifhennersdorf	Lower Oligocene	Sapindaceae	Acer	Acer_engelhardtii	deciduous	tree	lobed	dentate	palmate	non-looped	P	P	P	no	no	no	no	no	no	no
SNSD, MMG_PB	Sf._75	1	1	1	Seifhennersdorf	Lower Oligocene	Sapindaceae	Acer	Acer_engelhardtii	deciduous	tree	lobed	dentate	palmate	non-looped	P	P	P	no	no	no	no	no	no	no
SNSD, MMG_PB	Sf._76	1			Seifhennersdorf	Lower Oligocene	Sapindaceae	Acer	Acer_engelhardtii	deciduous	tree	lobed	dentate	palmate	non-looped	P	P	P	no	no	no	no	no	no	no
SNSD, MMG_PB	Sf._4671/4675	1	1	1	Seifhennersdorf	Lower Oligocene	Sapindaceae	Acer	Acer_engelhardtii	deciduous	tree	lobed	dentate	palmate	non-looped	P	P	P	no	no	no	no	no	no	no
SNSD, MMG_PB	Sf._8371	1			Seifhennersdorf	Lower Oligocene	Sapindaceae	Acer	Acer_engelhardtii	deciduous	tree	lobed	dentate	palmate	non-looped	NA	P	P	no	no	no	no	no	no	no
SNSD, MMG_PB	Sf._65	1			Seifhennersdorf	Lower Oligocene	Sapindaceae	Acer	Acer_palaeosaccharinum	deciduous	tree	lobed	dentate	palmate	non-looped	P	P	P	no	no	no	no	no	no	no
SNSD, MMG_PB	Sf._66	1			Seifhennersdorf	Lower Oligocene	Sapindaceae	Acer	Acer_palaeosaccharinum	deciduous	tree	lobed	dentate	palmate	non-looped	P	P	P	no	no	no	no	no	no	no
SNSD, MMG_PB	Sf._3001	1			Seifhennersdorf	Lower Oligocene	Sapindaceae	Acer	Acer_palaeosaccharinum	deciduous	tree	lobed	dentate	palmate	non-looped	P	P	P	no	no	no	no	no	no	no
SNSD, MMG_PB	Sf._3013	1	1		Seifhennersdorf	Lower Oligocene	Sapindaceae	Acer	Acer_palaeosaccharinum	deciduous	tree	lobed	dentate	palmate	non-looped	P	P	P	no	no	no	no	no	no	no
SNSD, MMG_PB	Sf._3048	1			Seifhennersdorf	Lower Oligocene	Sapindaceae	Acer	Acer_palaeosaccharinum	deciduous	tree	lobed	dentate	palmate	non-looped	NA	P	P	no	no	no	no	no	no	no
SNSD, MMG_PB	Sf._3688	1			Seifhennersdorf	Lower Oligocene	Sapindaceae	Acer	Acer_palaeosaccharinum	deciduous	tree	lobed	dentate	palmate	non-looped	P	P	P	no	no	no	no	no	no	no
SNSD, MMG_PB	Sf._3710:1,2a	1			Seifhennersdorf	Lower Oligocene	Sapindaceae	Acer	Acer_palaeosaccharinum	deciduous	tree	lobed	dentate	palmate	non-looped	P	P	P	no	no	no	no	no	no	no
SNSD, MMG_PB	Sf._4023	1			Seifhennersdorf	Lower Oligocene	Sapindaceae	Acer	Acer_palaeosaccharinum	deciduous	tree	lobed	dentate	palmate	non-looped	P	P	P	no	no	no	no	no	no	no
SNSD, MMG_PB	Sf._4145:1,2a	1	1	1	Seifhennersdorf	Lower Oligocene	Sapindaceae	Acer	Acer_palaeosaccharinum	deciduous	tree	lobed	dentate	palmate	non-looped	P	P	P	no	no	no	no	no	no	no
SNSD, MMG_PB	Sf._4472	1			Seifhennersdorf	Lower Oligocene	Sapindaceae	Acer	Acer_palaeosaccharinum	deciduous	tree	lobed	dentate	palmate	non-looped	P	P	P	yes	yes	no	no	no	no	no	5	57
SNSD, MMG_PB	Sf._4474	1			Seifhennersdorf	Lower Oligocene	Sapindaceae	Acer	Acer_palaeosaccharinum	deciduous	tree	lobed	dentate	palmate	non-looped	NA	P	P	no	no	no	no	no	no	no
SNSD, MMG_PB	Sf._4477	1			Seifhennersdorf	Lower Oligocene	Sapindaceae	Acer	Acer_palaeosaccharinum	deciduous	tree	lobed	dentate	palmate	non-looped	P	P	P	no	no	no	no	no	no	no
SNSD, MMG_PB	Sf._4512	1			Seifhennersdorf	Lower Oligocene	Sapindaceae	Acer	Acer_palaeosaccharinum	deciduous	tree	lobed	dentate	palmate	non-looped	P	P	P	no	no	no	no	no	no	no
SNSD, MMG_PB	Sf._4542	1			Seifhennersdorf	Lower Oligocene	Sapindaceae	Acer	Acer_palaeosaccharinum	deciduous	tree	lobed	dentate	palmate	non-looped	P	P	P	no	no	no	no	no	no	no
SNSD, MMG_PB	Sf._4608	1			Seifhennersdorf	Lower Oligocene	Sapindaceae	Acer	Acer_palaeosaccharinum	deciduous	tree	lobed	dentate	palmate	non-looped	NA	P	P	no	no	no	no	no	no	no
SNSD, MMG_PB	Sf._4623	1			Seifhennersdorf	Lower Oligocene	Sapindaceae	Acer	Acer_palaeosaccharinum	deciduous	tree	lobed	dentate	palmate	non-looped	P	P	P	no	no	no	no	no	no	no
SNSD, MMG_PB	Sf._4633	1			Seifhennersdorf	Lower Oligocene	Sapindaceae	Acer	Acer_palaeosaccharinum	deciduous	tree	lobed	dentate	palmate	non-looped	P	P	P	no	no	no	no	no	no	no
SNSD, MMG_PB	Sf._4678	1	1	1	Seifhennersdorf	Lower Oligocene	Sapindaceae	Acer	Acer_palaeosaccharinum	deciduous	tree	lobed	dentate	palmate	non-looped	P	P	P	no	no	no	no	no	no	no
SNSD, MMG_PB	Sf._7886	1	1		Seifhennersdorf	Lower Oligocene	Sapindaceae	Acer	Acer_palaeosaccharinum	deciduous	tree	lobed	dentate	palmate	non-looped	P	P	P	no	no	no	no	no	no	no
SNSD, MMG_PB	Sf._8366	1	1		Seifhennersdorf	Lower Oligocene	Sapindaceae	Acer	Acer_palaeosaccharinum	deciduous	tree	lobed	dentate	palmate	non-looped	P	P	P	no	no	no	no	no	no	no
SNSD, MMG_PB	Sf._8367	1			Seifhennersdorf	Lower Oligocene	Sapindaceae	Acer	Acer_palaeosaccharinum	deciduous	tree	lobed	dentate	palmate	non-looped	P	P	P	no	no	no	no	no	no	no
SNSD, MMG_PB	Sf._4490	1	1	1	Seifhennersdorf	Lower Oligocene	Sapindaceae	Acer	Acer_pseudomonspessulanum	deciduous	tree	lobed	dentate	palmate	looped	O	K,L	O	no	no	no	no	no	no	no
SNSD, MMG_PB	Sf._7471	1	1	1	Seifhennersdorf	Lower Oligocene	Sapindaceae	Acer	Acer_pseudomonspessulanum	deciduous	tree	lobed	entire	palmate	NA	NA	K,L	NA	no	no	no	no	no	no	no
SNSD, MMG_PB	Sf._8347	1			Seifhennersdorf	Lower Oligocene	Sapindaceae	Acer	Acer_pseudomonspessulanum	deciduous	tree	lobed	entire	palmate	looped	K	K,L	K	no	no	no	no	no	no	no
SNSD, MMG_PB	Sf._8676	1			Seifhennersdorf	Lower Oligocene	Sapindaceae	Acer	Acer_pseudomonspessulanum	deciduous	tree	lobed	entire	palmate	NA	NA	K,L	NA	no	no	no	no	no	no	no
SNSD, MMG_PB	Sf._1	1	1	1	Seifhennersdorf	Lower Oligocene	Sapindaceae	Acer	Acer_rueminianum	deciduous	tree	lobed	dentate	palmate	non-looped	P	O,P	P	yes	yes	no	no	no	no	no	2
SNSD, MMG_PB	Sf._5:1,2	1	1		Seifhennersdorf	Lower Oligocene	Sapindaceae	Acer	Acer_rueminianum	deciduous	tree	lobed	dentate	palmate	NA	NA	O,P	NA	no	no	no	no	no	no	no
SNSD, MMG_PB	Sf._22:1,2	1			Seifhennersdorf	Lower Oligocene	Sapindaceae	Acer	Acer_rueminianum	deciduous	tree	lobed	dentate	palmate	non-looped	P	O,P	P	no	no	no	no	no	no	no
SNSD, MMG_PB	Sf._35	1			Seifhennersdorf	Lower Oligocene	Sapindaceae	Acer	Acer_rueminianum	deciduous	tree	lobed	dentate	palmate	non-looped	P	O,P	P	no	no	no	no	no	no	no
SNSD, MMG_PB	Sf._64	1			Seifhennersdorf	Lower Oligocene	Sapindaceae	Acer	Acer_rueminianum	deciduous	tree	lobed	dentate	palmate	NA	NA	O,P	NA	no	no	no	no	no	no	no
SNSD, MMG_PB	Sf._358/1680	1	1		Seifhennersdorf	Lower Oligocene	Sapindaceae	Acer	Acer_rueminianum	deciduous	tree	lobed	dentate	palmate	NA	NA	O,P	NA	no	no	no	no	no	no	no
SNSD, MMG_PB	Sf._1249:1,2	1			Seifhennersdorf	Lower Oligocene	Sapindaceae	Acer	Acer_rueminianum	deciduous	tree	lobed	dentate	palmate	non-looped	P	O,P	P	no	no	no	no	no	no	no
SNSD, MMG_PB	Sf._3017	1			Seifhennersdorf	Lower Oligocene	Sapindaceae	Acer	Acer_rueminianum	deciduous	tree	lobed	dentate	palmate	NA	NA	O,P	NA	no	no	no	no	no	no	no
SNSD, MMG_PB	Sf._3041:1,2	1			Seifhennersdorf	Lower Oligocene	Sapindaceae	Acer	Acer_rueminianum	deciduous	tree	lobed	dentate	palmate	non-looped	P	O,P	P	no	no	no	no	no	no	no
SNSD, MMG_PB	Sf._3044	1			Seifhennersdorf	Lower Oligocene	Sapindaceae	Acer	Acer_rueminianum	deciduous	tree	lobed	dentate	palmate	NA	NA	O,P	NA	no	no	no	no	no	no	no
SNSD, MMG_PB	Sf._4164	1			Seifhennersdorf	Lower Oligocene	Sapindaceae	Acer	Acer_rueminianum	deciduous	tree	lobed	dentate	palmate	NA	NA	O,P	NA	no	no	no	no	no	no	no
SNSD, MMG_PB	Sf._4339/8660	1	1		Seifhennersdorf	Lower Oligocene	Sapindaceae	Acer	Acer_rueminianum	deciduous	tree	lobed	dentate	palmate	non-looped	P	O,P	P	no	no	no	no	no	no	no
SNSD, MMG_PB	Sf._4341	1			Seifhennersdorf	Lower Oligocene	Sapindaceae	Acer	Acer_rueminianum	deciduous	tree	lobed	dentate	palmate	NA	NA	O,P	NA	no	no	no	no	no	no	no
SNSD, MMG_PB	Sf._4514	1	1	1	Seifhennersdorf	Lower Oligocene	Sapindaceae	Acer	Acer_rueminianum	deciduous	tree	lobed	dentate	palmate	non-looped	P	O,P	P	no	no	no	no	no	no	no
SNSD, MMG_PB	Sf._4525	1			Seifhennersdorf	Lower Oligocene	Sapindaceae	Acer	Acer_rueminianum	deciduous	tree	lobed	dentate	palmate	NA	NA	O,P	NA	no	no	no	no	no	no	no
SNSD, MMG_PB	Sf._4540	1	1	1	Seifhennersdorf	Lower Oligocene	Sapindaceae	Acer	Acer_rueminianum	deciduous	tree	lobed	dentate	palmate	non-looped	P	O,P	P	no	no	no	no	no	no	no
SNSD, MMG_PB	Sf._4584	1			Seifhennersdorf	Lower Oligocene	Sapindaceae	Acer	Acer_rueminianum	deciduous	tree	lobed	dentate	palmate	non-looped	P	O,P	P	no	no	no	no	no	no	no
SNSD, MMG_PB	Sf._4587	1			Seifhennersdorf	Lower Oligocene	Sapindaceae	Acer	Acer_rueminianum	deciduous	tree	lobed	dentate	palmate	NA	NA	O,P	NA	no	no	no	no	no	no	no
SNSD, MMG_PB	Sf._4588/4577	1			Seifhennersdorf	Lower Oligocene	Sapindaceae	Acer	Acer_rueminianum	deciduous	tree	lobed	dentate	palmate	NA	NA	O,P	NA	no	no	no	no	no	no	no
SNSD, MMG_PB	Sf._4610/4628	1			Seifhennersdorf	Lower Oligocene	Sapindaceae	Acer	Acer_rueminianum	deciduous	tree	lobed	dentate	palmate	non-looped	P	O,P	P	no	no	no	no	no	no	no
SNSD, MMG_PB	Sf._4611:1,2	1			Seifhennersdorf	Lower Oligocene	Sapindaceae	Acer	Acer_rueminianum	deciduous	tree	lobed	dentate	palmate	non-looped	P	O,P	P	no	no	no	no	no	no	no
SNSD, MMG_PB	Sf._4622/4676	1	1	1	Seifhennersdorf	Lower Oligocene	Sapindaceae	Acer	Acer_rueminianum	deciduous	tree	lobed	dentate	palmate	NA	NA	O,P	NA	no	no	no	no	no	no	no
SNSD, MMG_PB	Sf._4636	1			Seifhennersdorf	Lower Oligocene	Sapindaceae	Acer	Acer_rueminianum	deciduous	tree	lobed	dentate	palmate	non-looped	P	O,P	P	no	no	no	no	no	no	no
SNSD, MMG_PB	Sf._4663a	1			Seifhennersdorf	Lower Oligocene	Sapindaceae	Acer	Acer_rueminianum	deciduous	tree	lobed	dentate	palmate	non-looped	P	O,P	P	no	no	no	no	no	no	no
SNSD, MMG_PB	Sf._4665:1,2	1	1	1	Seifhennersdorf	Lower Oligocene	Sapindaceae	Acer	Acer_rueminianum	deciduous	tree	lobed	dentate	palmate	non-looped	P	O,P	P	no	no	no	no	no	no	no
SNSD, MMG_PB	Sf._4677/5437b	1	1	1	Seifhennersdorf	Lower Oligocene	Sapindaceae	Acer	Acer_rueminianum	deciduous	tree	lobed	dentate	palmate	non-looped	P	O,P	P	yes	yes	no	no	no	no	no	2
SNSD, MMG_PB	Sf._8166:1,2	1	1		Seifhennersdorf	Lower Oligocene	Sapindaceae	Acer	Acer_rueminianum	deciduous	tree	lobed	dentate	palmate	non-looped	P	O,P	P	no	no	no	no	no	no	no
SNSD, MMG_PB	Sf._8167	1	1		Seifhennersdorf	Lower Oligocene	Sapindaceae	Acer	Acer_rueminianum	deciduous	tree	lobed	dentate	palmate	non-looped	P	O,P	P	no	no	no	no	no	no	no
SNSD, MMG_PB	Sf._8355	1	1	1	Seifhennersdorf	Lower Oligocene	Sapindaceae	Acer	Acer_rueminianum	deciduous	tree	lobed	dentate	palmate	non-looped	P	O,P	P	no	no	no	no	no	no	no
SNSD, MMG_PB	Sf._8356	1			Seifhennersdorf	Lower Oligocene	Sapindaceae	Acer	Acer_rueminianum	deciduous	tree	lobed	dentate	palmate	NA	NA	O,P	NA	no	no	no	no	no	no	no
SNSD, MMG_PB	Sf._8357:1,2	1			Seifhennersdorf	Lower Oligocene	Sapindaceae	Acer	Acer_rueminianum	deciduous	tree	lobed	dentate	palmate	non-looped	P	O,P	P	no	no	no	no	no	no	no
SNSD, MMG_PB	Sf._8597	1	1	1	Seifhennersdorf	Lower Oligocene	Sapindaceae	Acer	Acer_rueminianum	deciduous	tree	lobed	dentate	palmate	non-looped	P	O,P	P	no	no	no	no	no	no	no
SNSD, MMG_PB	Sf._20 (II)	1			Seifhennersdorf	Lower Oligocene	Sapindaceae	Acer	Acer_sp	deciduous	NA	NA	NA	NA	NA	NA	NA	NA	no	no	no	no	no	no	no
SNSD, MMG_PB	Sf._57	1			Seifhennersdorf	Lower Oligocene	Sapindaceae	Acer	Acer_sp	deciduous	NA	lobed	dentate	palmate	NA	NA	NA	NA	no	no	no	no	no	no	no
SNSD, MMG_PB	Sf._70 (I)	1			Seifhennersdorf	Lower Oligocene	Sapindaceae	Acer	Acer_sp	deciduous	NA	lobed	dentate	palmate	non-looped	P	NA	P	no	no	no	no	no	no	no
SNSD, MMG_PB	Sf._78	1			Seifhennersdorf	Lower Oligocene	Sapindaceae	Acer	Acer_sp	deciduous	NA	lobed	dentate	palmate	NA	NA	NA	NA	no	no	no	no	no	no	no
SNSD, MMG_PB	Sf._79	1			Seifhennersdorf	Lower Oligocene	Sapindaceae	Acer	Acer_sp	deciduous	NA	NA	dentate	NA	NA	NA	NA	NA	no	no	no	no	no	no	no
SNSD, MMG_PB	Sf._2065	1			Seifhennersdorf	Lower Oligocene	Sapindaceae	Acer	Acer_sp	deciduous	NA	lobed	dentate	palmate	non-looped	P	NA	P	no	no	no	no	no	no	no
SNSD, MMG_PB	Sf._2241	1			Seifhennersdorf	Lower Oligocene	Sapindaceae	Acer	Acer_sp	deciduous	NA	lobed	dentate	palmate	non-looped	P	NA	P	no	no	no	no	no	no	no
SNSD, MMG_PB	Sf._2277:1,2	1			Seifhennersdorf	Lower Oligocene	Sapindaceae	Acer	Acer_sp	deciduous	NA	lobed	dentate	palmate	NA	NA	NA	NA	no	no	no	no	no	no	no
SNSD, MMG_PB	Sf._2297	1			Seifhennersdorf	Lower Oligocene	Sapindaceae	Acer	Acer_sp	deciduous	NA	NA	dentate	NA	NA	NA	NA	NA	no	no	no	no	no	no	no
SNSD, MMG_PB	Sf._2856	1			Seifhennersdorf	Lower Oligocene	Sapindaceae	Acer	Acer_sp	deciduous	NA	NA	NA	NA	NA	NA	NA	NA	no	no	no	no	no	no	no
SNSD, MMG_PB	Sf._2992	1			Seifhennersdorf	Lower Oligocene	Sapindaceae	Acer	Acer_sp	deciduous	NA	lobed	dentate	palmate	non-looped	P	NA	P	no	no	no	no	no	no	no
SNSD, MMG_PB	Sf._2996	1			Seifhennersdorf	Lower Oligocene	Sapindaceae	Acer	Acer_sp	deciduous	NA	lobed	dentate	palmate	NA	NA	NA	NA	no	no	no	no	no	no	no
SNSD, MMG_PB	Sf._2997	1			Seifhennersdorf	Lower Oligocene	Sapindaceae	Acer	Acer_sp	deciduous	NA	lobed	dentate	palmate	non-looped	P	NA	P	no	no	no	no	no	no	no
SNSD, MMG_PB	Sf._2998:1,2	1			Seifhennersdorf	Lower Oligocene	Sapindaceae	Acer	Acer_sp	deciduous	NA	lobed	dentate	palmate	non-looped	P	NA	P	no	no	no	no	no	no	no
SNSD, MMG_PB	Sf._3000	1			Seifhennersdorf	Lower Oligocene	Sapindaceae	Acer	Acer_sp	deciduous	NA	lobed	dentate	palmate	non-looped	P	NA	P	no	no	no	no	no	no	no
SNSD, MMG_PB	Sf._3003	1			Seifhennersdorf	Lower Oligocene	Sapindaceae	Acer	Acer_sp	deciduous	NA	NA	NA	NA	NA	NA	NA	NA	no	no	no	no	no	no	no
SNSD, MMG_PB	Sf._3004/2999	1			Seifhennersdorf	Lower Oligocene	Sapindaceae	Acer	Acer_sp	deciduous	NA	lobed	dentate	palmate	non-looped	P	NA	P	no	no	no	no	no	no	no
SNSD, MMG_PB	Sf._3007	1			Seifhennersdorf	Lower Oligocene	Sapindaceae	Acer	Acer_sp	deciduous	NA	lobed	dentate	palmate	NA	NA	NA	NA	no	no	no	no	no	no	no
SNSD, MMG_PB	Sf._3009	1			Seifhennersdorf	Lower Oligocene	Sapindaceae	Acer	Acer_sp	deciduous	NA	lobed	dentate	palmate	non-looped	P	NA	P	no	no	no	no	no	no	no
SNSD, MMG_PB	Sf._3010	1			Seifhennersdorf	Lower Oligocene	Sapindaceae	Acer	Acer_sp	deciduous	NA	lobed	dentate	palmate	NA	NA	NA	NA	no	no	no	no	no	no	no
SNSD, MMG_PB	Sf._3016	1			Seifhennersdorf	Lower Oligocene	Sapindaceae	Acer	Acer_sp	deciduous	NA	NA	NA	NA	NA	NA	NA	NA	no	no	no	no	no	no	no
SNSD, MMG_PB	Sf._3018	1			Seifhennersdorf	Lower Oligocene	Sapindaceae	Acer	Acer_sp	deciduous	NA	lobed	dentate	palmate	non-looped	P	NA	P	no	no	no	no	no	no	no
SNSD, MMG_PB	Sf._3019	1			Seifhennersdorf	Lower Oligocene	Sapindaceae	Acer	Acer_sp	deciduous	NA	lobed	dentate	palmate	non-looped	P	NA	P	yes	yes	no	no	no	no	no	2
SNSD, MMG_PB	Sf._3021	1			Seifhennersdorf	Lower Oligocene	Sapindaceae	Acer	Acer_sp	deciduous	NA	NA	NA	NA	NA	NA	NA	NA	no	no	no	no	no	no	no
SNSD, MMG_PB	Sf._3023:1,2a	1			Seifhennersdorf	Lower Oligocene	Sapindaceae	Acer	Acer_sp	deciduous	NA	NA	NA	NA	NA	NA	NA	NA	no	no	no	no	no	no	no
SNSD, MMG_PB	Sf._3024	1			Seifhennersdorf	Lower Oligocene	Sapindaceae	Acer	Acer_sp	deciduous	NA	lobed	dentate	palmate	non-looped	P	NA	P	no	no	no	no	no	no	no
SNSD, MMG_PB	Sf._3025	1			Seifhennersdorf	Lower Oligocene	Sapindaceae	Acer	Acer_sp	deciduous	NA	lobed	dentate	palmate	non-looped	P	NA	P	no	no	no	no	no	no	no
SNSD, MMG_PB	Sf._3026	1			Seifhennersdorf	Lower Oligocene	Sapindaceae	Acer	Acer_sp	deciduous	NA	lobed	dentate	palmate	non-looped	P	NA	P	no	no	no	no	no	no	no
SNSD, MMG_PB	Sf._3027	1			Seifhennersdorf	Lower Oligocene	Sapindaceae	Acer	Acer_sp	deciduous	NA	lobed	dentate	palmate	NA	NA	NA	NA	no	no	no	no	no	no	no
SNSD, MMG_PB	Sf._3033	1			Seifhennersdorf	Lower Oligocene	Sapindaceae	Acer	Acer_sp	deciduous	NA	lobed	dentate	palmate	non-looped	P	NA	P	no	no	no	no	no	no	no
SNSD, MMG_PB	Sf._3034:1,2	1			Seifhennersdorf	Lower Oligocene	Sapindaceae	Acer	Acer_sp	deciduous	NA	lobed	dentate	palmate	non-looped	P	NA	P	no	no	no	no	no	no	no
SNSD, MMG_PB	Sf._3035:1,2	1			Seifhennersdorf	Lower Oligocene	Sapindaceae	Acer	Acer_sp	deciduous	NA	lobed	entire	palmate	non-looped	L	NA	L	no	no	no	no	no	no	no
SNSD, MMG_PB	Sf._3036	1			Seifhennersdorf	Lower Oligocene	Sapindaceae	Acer	Acer_sp	deciduous	NA	lobed	dentate	palmate	NA	NA	NA	NA	no	no	no	no	no	no	no
SNSD, MMG_PB	Sf._3037:1,2	1			Seifhennersdorf	Lower Oligocene	Sapindaceae	Acer	Acer_sp	deciduous	NA	lobed	dentate	palmate	non-looped	P	NA	P	yes	yes	no	no	no	no	no	2	57
SNSD, MMG_PB	Sf._3043	1			Seifhennersdorf	Lower Oligocene	Sapindaceae	Acer	Acer_sp	deciduous	NA	lobed	dentate	palmate	non-looped	P	NA	P	no	no	no	no	no	no	no
SNSD, MMG_PB	Sf._3046	1			Seifhennersdorf	Lower Oligocene	Sapindaceae	Acer	Acer_sp	deciduous	NA	lobed	dentate	palmate	non-looped	P	NA	P	no	no	no	no	no	no	no
SNSD, MMG_PB	Sf._3049:1,2	1			Seifhennersdorf	Lower Oligocene	Sapindaceae	Acer	Acer_sp	deciduous	NA	NA	NA	NA	NA	NA	NA	NA	no	no	no	no	no	no	no
SNSD, MMG_PB	Sf._3051	1			Seifhennersdorf	Lower Oligocene	Sapindaceae	Acer	Acer_sp	deciduous	NA	lobed	dentate	palmate	NA	NA	NA	NA	no	no	no	no	no	no	no
SNSD, MMG_PB	Sf._3054	1			Seifhennersdorf	Lower Oligocene	Sapindaceae	Acer	Acer_sp	deciduous	NA	lobed	dentate	palmate	NA	NA	NA	NA	no	no	no	no	no	no	no
SNSD, MMG_PB	Sf._3224	1			Seifhennersdorf	Lower Oligocene	Sapindaceae	Acer	Acer_sp	deciduous	NA	lobed	dentate	palmate	non-looped	P	NA	P	no	no	no	no	no	no	no
SNSD, MMG_PB	Sf._3430:1,2	1			Seifhennersdorf	Lower Oligocene	Sapindaceae	Acer	Acer_sp	deciduous	NA	lobed	dentate	palmate	NA	NA	NA	NA	no	no	no	no	no	no	no
SNSD, MMG_PB	Sf._3715:1,2	1			Seifhennersdorf	Lower Oligocene	Sapindaceae	Acer	Acer_sp	deciduous	NA	lobed	dentate	palmate	NA	NA	NA	NA	no	no	no	no	no	no	no
SNSD, MMG_PB	Sf._3716:1,2	1			Seifhennersdorf	Lower Oligocene	Sapindaceae	Acer	Acer_sp	deciduous	NA	lobed	dentate	palmate	NA	NA	NA	NA	no	no	no	no	no	no	no
SNSD, MMG_PB	Sf._3720:1,2	1			Seifhennersdorf	Lower Oligocene	Sapindaceae	Acer	Acer_sp	deciduous	NA	lobed	entire	palmate	NA	NA	NA	NA	no	no	no	no	no	no	no
SNSD, MMG_PB	Sf._3749	1			Seifhennersdorf	Lower Oligocene	Sapindaceae	Acer	Acer_sp	deciduous	NA	lobed	dentate	palmate	NA	NA	NA	NA	no	no	no	no	no	no	no
SNSD, MMG_PB	Sf._3759	1			Seifhennersdorf	Lower Oligocene	Sapindaceae	Acer	Acer_sp	deciduous	NA	NA	NA	NA	NA	NA	NA	NA	no	no	no	no	no	no	no
SNSD, MMG_PB	Sf._3762	1			Seifhennersdorf	Lower Oligocene	Sapindaceae	Acer	Acer_sp	deciduous	NA	lobed	dentate	palmate	NA	NA	NA	NA	no	no	no	no	no	no	no
SNSD, MMG_PB	Sf._3763	1			Seifhennersdorf	Lower Oligocene	Sapindaceae	Acer	Acer_sp	deciduous	NA	lobed	dentate	palmate	NA	NA	NA	NA	no	no	no	no	no	no	no
SNSD, MMG_PB	Sf._3771	1			Seifhennersdorf	Lower Oligocene	Sapindaceae	Acer	Acer_sp	deciduous	NA	lobed	dentate	palmate	non-looped	P	NA	P	no	no	no	no	no	no	no
SNSD, MMG_PB	Sf._4008	1			Seifhennersdorf	Lower Oligocene	Sapindaceae	Acer	Acer_sp	deciduous	NA	lobed	dentate	palmate	non-looped	P	NA	P	no	no	no	no	no	no	no
SNSD, MMG_PB	Sf._4020	1			Seifhennersdorf	Lower Oligocene	Sapindaceae	Acer	Acer_sp	deciduous	NA	lobed	dentate	palmate	NA	NA	NA	NA	no	no	no	no	no	no	no
SNSD, MMG_PB	Sf._4060:1,2	1			Seifhennersdorf	Lower Oligocene	Sapindaceae	Acer	Acer_sp	deciduous	NA	lobed	dentate	palmate	NA	NA	NA	NA	no	no	no	no	no	no	no
SNSD, MMG_PB	Sf._4081:1,2	1			Seifhennersdorf	Lower Oligocene	Sapindaceae	Acer	Acer_sp	deciduous	NA	lobed	entire	palmate	non-looped	L	NA	L	no	no	no	no	no	no	no
SNSD, MMG_PB	Sf._4117	1			Seifhennersdorf	Lower Oligocene	Sapindaceae	Acer	Acer_sp	deciduous	NA	lobed	dentate	palmate	non-looped	P	NA	P	no	no	no	no	no	no	no
SNSD, MMG_PB	Sf._4123	1			Seifhennersdorf	Lower Oligocene	Sapindaceae	Acer	Acer_sp	deciduous	NA	lobed	dentate	palmate	NA	NA	NA	NA	no	no	no	no	no	no	no
SNSD, MMG_PB	Sf._4161	1			Seifhennersdorf	Lower Oligocene	Sapindaceae	Acer	Acer_sp	deciduous	NA	lobed	dentate	palmate	NA	NA	NA	NA	no	no	no	no	no	no	no
SNSD, MMG_PB	Sf._4237	1			Seifhennersdorf	Lower Oligocene	Sapindaceae	Acer	Acer_sp	deciduous	NA	lobed	dentate	palmate	NA	NA	NA	NA	no	no	no	no	no	no	no
SNSD, MMG_PB	Sf._4349:1,2	1			Seifhennersdorf	Lower Oligocene	Sapindaceae	Acer	Acer_sp	deciduous	NA	NA	NA	NA	NA	NA	NA	NA	no	no	no	no	no	no	no
SNSD, MMG_PB	Sf._4350	1			Seifhennersdorf	Lower Oligocene	Sapindaceae	Acer	Acer_sp	deciduous	NA	NA	NA	NA	NA	NA	NA	NA	no	no	no	no	no	no	no
SNSD, MMG_PB	Sf._4471	1			Seifhennersdorf	Lower Oligocene	Sapindaceae	Acer	Acer_sp	deciduous	NA	NA	NA	NA	NA	NA	NA	NA	no	no	no	no	no	no	no
SNSD, MMG_PB	Sf._4473	1			Seifhennersdorf	Lower Oligocene	Sapindaceae	Acer	Acer_sp	deciduous	NA	lobed	dentate	palmate	non-looped	P	NA	P	no	no	no	no	no	no	no
SNSD, MMG_PB	Sf._4475	1			Seifhennersdorf	Lower Oligocene	Sapindaceae	Acer	Acer_sp	deciduous	NA	lobed	dentate	palmate	non-looped	P	NA	P	no	no	no	no	no	no	no
SNSD, MMG_PB	Sf._4479:1,2	1			Seifhennersdorf	Lower Oligocene	Sapindaceae	Acer	Acer_sp	deciduous	NA	NA	NA	NA	NA	NA	NA	NA	no	no	no	no	no	no	no
SNSD, MMG_PB	Sf._4481:1,2	1			Seifhennersdorf	Lower Oligocene	Sapindaceae	Acer	Acer_sp	deciduous	NA	lobed	dentate	palmate	non-looped	P	NA	P	no	no	no	no	no	no	no
SNSD, MMG_PB	Sf._4485	1			Seifhennersdorf	Lower Oligocene	Sapindaceae	Acer	Acer_sp	deciduous	NA	lobed	dentate	palmate	NA	NA	NA	NA	no	no	no	no	no	no	no
SNSD, MMG_PB	Sf._4488	1			Seifhennersdorf	Lower Oligocene	Sapindaceae	Acer	Acer_sp	deciduous	NA	lobed	entire	palmate	looped	K	NA	K	no	no	no	no	no	no	no
SNSD, MMG_PB	Sf._4490	1			Seifhennersdorf	Lower Oligocene	Sapindaceae	Acer	Acer_sp	deciduous	NA	lobed	dentate	palmate	non-looped	P	NA	P	no	no	no	no	no	no	no
SNSD, MMG_PB	Sf._4491	1			Seifhennersdorf	Lower Oligocene	Sapindaceae	Acer	Acer_sp	deciduous	NA	lobed	dentate	palmate	non-looped	P	NA	P	no	no	no	no	no	no	no
SNSD, MMG_PB	Sf._4498	1			Seifhennersdorf	Lower Oligocene	Sapindaceae	Acer	Acer_sp	deciduous	NA	lobed	dentate	palmate	non-looped	P	NA	P	no	no	no	no	no	no	no
SNSD, MMG_PB	Sf._4501	1			Seifhennersdorf	Lower Oligocene	Sapindaceae	Acer	Acer_sp	deciduous	NA	lobed	dentate	palmate	NA	NA	NA	NA	no	no	no	no	no	no	no
SNSD, MMG_PB	Sf._4502	1			Seifhennersdorf	Lower Oligocene	Sapindaceae	Acer	Acer_sp	deciduous	NA	lobed	dentate	palmate	NA	NA	NA	NA	no	no	no	no	no	no	no
SNSD, MMG_PB	Sf._4505/4506	1			Seifhennersdorf	Lower Oligocene	Sapindaceae	Acer	Acer_sp	deciduous	NA	lobed	entire	palmate	looped	K	NA	K	no	no	no	no	no	no	no
SNSD, MMG_PB	Sf._4507	1			Seifhennersdorf	Lower Oligocene	Sapindaceae	Acer	Acer_sp	deciduous	NA	lobed	dentate	palmate	NA	NA	NA	NA	no	no	no	no	no	no	no
SNSD, MMG_PB	Sf._4510c	1			Seifhennersdorf	Lower Oligocene	Sapindaceae	Acer	Acer_sp	deciduous	NA	NA	NA	NA	NA	NA	NA	NA	no	no	no	no	no	no	no
SNSD, MMG_PB	Sf._4513	1			Seifhennersdorf	Lower Oligocene	Sapindaceae	Acer	Acer_sp	deciduous	NA	lobed	dentate	palmate	NA	NA	NA	NA	no	no	no	no	no	no	no
SNSD, MMG_PB	Sf._4573/4568	1			Seifhennersdorf	Lower Oligocene	Sapindaceae	Acer	Acer_sp	deciduous	NA	NA	NA	NA	NA	NA	NA	NA	no	no	no	no	no	no	no
SNSD, MMG_PB	Sf._4576	1			Seifhennersdorf	Lower Oligocene	Sapindaceae	Acer	Acer_sp	deciduous	NA	lobed	dentate	palmate	NA	NA	NA	NA	no	no	no	no	no	no	no
SNSD, MMG_PB	Sf._4593	1			Seifhennersdorf	Lower Oligocene	Sapindaceae	Acer	Acer_sp	deciduous	NA	lobed	entire	palmate	non-looped	L	NA	L	no	no	no	no	no	no	no
SNSD, MMG_PB	Sf._4594:1,2a	1			Seifhennersdorf	Lower Oligocene	Sapindaceae	Acer	Acer_sp	deciduous	NA	lobed	dentate	palmate	non-looped	P	NA	P	no	no	no	no	no	no	no
SNSD, MMG_PB	Sf._4596	1			Seifhennersdorf	Lower Oligocene	Sapindaceae	Acer	Acer_sp	deciduous	NA	lobed	dentate	palmate	non-looped	P	NA	P	no	no	no	no	no	no	no
SNSD, MMG_PB	Sf._4597	1			Seifhennersdorf	Lower Oligocene	Sapindaceae	Acer	Acer_sp	deciduous	NA	NA	NA	NA	NA	NA	NA	NA	no	no	no	no	no	no	no
SNSD, MMG_PB	Sf._4602	1			Seifhennersdorf	Lower Oligocene	Sapindaceae	Acer	Acer_sp	deciduous	NA	lobed	dentate	palmate	NA	NA	NA	NA	no	no	no	no	no	no	no
SNSD, MMG_PB	Sf._4609	1			Seifhennersdorf	Lower Oligocene	Sapindaceae	Acer	Acer_sp	deciduous	NA	NA	NA	NA	NA	NA	NA	NA	no	no	no	no	no	no	no
SNSD, MMG_PB	Sf._4615	1			Seifhennersdorf	Lower Oligocene	Sapindaceae	Acer	Acer_sp	deciduous	NA	NA	NA	NA	NA	NA	NA	NA	no	no	no	no	no	no	no
SNSD, MMG_PB	Sf._4618	1			Seifhennersdorf	Lower Oligocene	Sapindaceae	Acer	Acer_sp	deciduous	NA	lobed	dentate	palmate	non-looped	P	NA	P	no	no	no	no	no	no	no
SNSD, MMG_PB	Sf._4619/4614	1			Seifhennersdorf	Lower Oligocene	Sapindaceae	Acer	Acer_sp	deciduous	NA	lobed	dentate	palmate	non-looped	P	NA	P	no	no	no	no	no	no	no
SNSD, MMG_PB	Sf._4627	1			Seifhennersdorf	Lower Oligocene	Sapindaceae	Acer	Acer_sp	deciduous	NA	NA	NA	NA	NA	NA	NA	NA	no	no	no	no	no	no	no
SNSD, MMG_PB	Sf._4634	1			Seifhennersdorf	Lower Oligocene	Sapindaceae	Acer	Acer_sp	deciduous	NA	lobed	dentate	palmate	NA	NA	NA	NA	no	no	no	no	no	no	no
SNSD, MMG_PB	Sf._4637	1			Seifhennersdorf	Lower Oligocene	Sapindaceae	Acer	Acer_sp	deciduous	NA	NA	NA	NA	NA	NA	NA	NA	no	no	no	no	no	no	no
SNSD, MMG_PB	Sf._4638	1			Seifhennersdorf	Lower Oligocene	Sapindaceae	Acer	Acer_sp	deciduous	NA	NA	NA	NA	NA	NA	NA	NA	no	no	no	no	no	no	no
SNSD, MMG_PB	Sf._4639	1			Seifhennersdorf	Lower Oligocene	Sapindaceae	Acer	Acer_sp	deciduous	NA	lobed	dentate	palmate	NA	NA	NA	NA	no	no	no	no	no	no	no
SNSD, MMG_PB	Sf._4640	1			Seifhennersdorf	Lower Oligocene	Sapindaceae	Acer	Acer_sp	deciduous	NA	NA	NA	NA	NA	NA	NA	NA	no	no	no	no	no	no	no
SNSD, MMG_PB	Sf._4641	1			Seifhennersdorf	Lower Oligocene	Sapindaceae	Acer	Acer_sp	deciduous	NA	NA	NA	NA	NA	NA	NA	NA	no	no	no	no	no	no	no
SNSD, MMG_PB	Sf._4642	1			Seifhennersdorf	Lower Oligocene	Sapindaceae	Acer	Acer_sp	deciduous	NA	lobed	dentate	palmate	NA	NA	NA	NA	no	no	no	no	no	no	no
SNSD, MMG_PB	Sf._4645	1			Seifhennersdorf	Lower Oligocene	Sapindaceae	Acer	Acer_sp	deciduous	NA	lobed	dentate	palmate	non-looped	P	NA	P	no	no	no	no	no	no	no
SNSD, MMG_PB	Sf._4650	1			Seifhennersdorf	Lower Oligocene	Sapindaceae	Acer	Acer_sp	deciduous	NA	NA	NA	NA	NA	NA	NA	NA	no	no	no	no	no	no	no
SNSD, MMG_PB	Sf._4652	1			Seifhennersdorf	Lower Oligocene	Sapindaceae	Acer	Acer_sp	deciduous	NA	lobed	dentate	palmate	NA	NA	NA	NA	no	no	no	no	no	no	no
SNSD, MMG_PB	Sf._4654	1			Seifhennersdorf	Lower Oligocene	Sapindaceae	Acer	Acer_sp	deciduous	NA	lobed	dentate	palmate	NA	NA	NA	NA	no	no	no	no	no	no	no
SNSD, MMG_PB	Sf._4657	1			Seifhennersdorf	Lower Oligocene	Sapindaceae	Acer	Acer_sp	deciduous	NA	NA	NA	NA	NA	NA	NA	NA	no	no	no	no	no	no	no
SNSD, MMG_PB	Sf._4658	1			Seifhennersdorf	Lower Oligocene	Sapindaceae	Acer	Acer_sp	deciduous	NA	lobed	dentate	palmate	NA	NA	NA	NA	no	no	no	no	no	no	no
SNSD, MMG_PB	Sf._4659	1			Seifhennersdorf	Lower Oligocene	Sapindaceae	Acer	Acer_sp	deciduous	NA	lobed	dentate	palmate	non-looped	P	NA	P	no	no	no	no	no	no	no
SNSD, MMG_PB	Sf._4660	1			Seifhennersdorf	Lower Oligocene	Sapindaceae	Acer	Acer_sp	deciduous	NA	lobed	dentate	palmate	non-looped	P	NA	P	no	no	no	no	no	no	no
SNSD, MMG_PB	Sf._4664	1			Seifhennersdorf	Lower Oligocene	Sapindaceae	Acer	Acer_sp	deciduous	NA	lobed	dentate	palmate	NA	NA	NA	NA	no	no	no	no	no	no	no
SNSD, MMG_PB	Sf._4674	1			Seifhennersdorf	Lower Oligocene	Sapindaceae	Acer	Acer_sp	deciduous	NA	lobed	dentate	palmate	non-looped	P	NA	P	no	no	no	no	no	no	no
SNSD, MMG_PB	Sf._5534	1			Seifhennersdorf	Lower Oligocene	Sapindaceae	Acer	Acer_sp	deciduous	NA	lobed	dentate	palmate	NA	NA	NA	NA	no	no	no	no	no	no	no
SNSD, MMG_PB	Sf._5664	1			Seifhennersdorf	Lower Oligocene	Sapindaceae	Acer	Acer_sp	deciduous	NA	lobed	dentate	palmate	NA	NA	NA	NA	no	no	no	no	no	no	no
SNSD, MMG_PB	Sf._6397	1			Seifhennersdorf	Lower Oligocene	Sapindaceae	Acer	Acer_sp	deciduous	NA	lobed	dentate	palmate	NA	NA	NA	NA	no	no	no	no	no	no	no
SNSD, MMG_PB	Sf._7556b	1			Seifhennersdorf	Lower Oligocene	Sapindaceae	Acer	Acer_sp	deciduous	NA	lobed	dentate	palmate	non-looped	P	NA	P	no	no	no	no	no	no	no
SNSD, MMG_PB	Sf._7937b	1			Seifhennersdorf	Lower Oligocene	Sapindaceae	Acer	Acer_sp	deciduous	NA	lobed	dentate	palmate	NA	NA	NA	NA	no	no	no	no	no	no	no
SNSD, MMG_PB	Sf._8038:1,2	1			Seifhennersdorf	Lower Oligocene	Sapindaceae	Acer	Acer_sp	deciduous	NA	NA	NA	NA	NA	NA	NA	NA	no	no	no	no	no	no	no
SNSD, MMG_PB	Sf._8142:1,2	1			Seifhennersdorf	Lower Oligocene	Sapindaceae	Acer	Acer_sp	deciduous	NA	lobed	dentate	palmate	non-looped	P	NA	P	no	no	no	no	no	no	no
SNSD, MMG_PB	Sf._8144:1,2	1			Seifhennersdorf	Lower Oligocene	Sapindaceae	Acer	Acer_sp	deciduous	NA	lobed	dentate	palmate	NA	NA	NA	NA	no	no	no	no	no	no	no
SNSD, MMG_PB	Sf._8150	1			Seifhennersdorf	Lower Oligocene	Sapindaceae	Acer	Acer_sp	deciduous	NA	lobed	dentate	palmate	non-looped	P	NA	P	no	no	no	no	no	no	no
SNSD, MMG_PB	Sf._8170/8659	1			Seifhennersdorf	Lower Oligocene	Sapindaceae	Acer	Acer_sp	deciduous	NA	NA	NA	NA	NA	NA	NA	NA	no	no	no	no	no	no	no
SNSD, MMG_PB	Sf._8185	1			Seifhennersdorf	Lower Oligocene	Sapindaceae	Acer	Acer_sp	deciduous	NA	lobed	dentate	palmate	NA	NA	NA	NA	no	no	no	no	no	no	no
SNSD, MMG_PB	Sf._8351	1			Seifhennersdorf	Lower Oligocene	Sapindaceae	Acer	Acer_sp	deciduous	NA	lobed	dentate	palmate	non-looped	P	NA	P	no	no	no	no	no	no	no
SNSD, MMG_PB	Sf._8354	1			Seifhennersdorf	Lower Oligocene	Sapindaceae	Acer	Acer_sp	deciduous	NA	NA	NA	NA	NA	NA	NA	NA	no	no	no	no	no	no	no
SNSD, MMG_PB	Sf._8377	1			Seifhennersdorf	Lower Oligocene	Sapindaceae	Acer	Acer_sp	deciduous	NA	lobed	dentate	palmate	non-looped	P	NA	P	no	no	no	no	no	no	no
SNSD, MMG_PB	Sf._8386	1			Seifhennersdorf	Lower Oligocene	Sapindaceae	Acer	Acer_sp	deciduous	NA	NA	NA	NA	NA	NA	NA	NA	no	no	no	no	no	no	no
SNSD, MMG_PB	Sf._8387	1			Seifhennersdorf	Lower Oligocene	Sapindaceae	Acer	Acer_sp	deciduous	NA	lobed	dentate	palmate	NA	NA	NA	NA	no	no	no	no	no	no	no
SNSD, MMG_PB	Sf._8388	1			Seifhennersdorf	Lower Oligocene	Sapindaceae	Acer	Acer_sp	deciduous	NA	NA	NA	NA	NA	NA	NA	NA	no	no	no	no	no	no	no
SNSD, MMG_PB	Sf._8390	1			Seifhennersdorf	Lower Oligocene	Sapindaceae	Acer	Acer_sp	deciduous	NA	lobed	dentate	palmate	NA	NA	NA	NA	no	no	no	no	no	no	no
SNSD, MMG_PB	Sf._8391/8389	1			Seifhennersdorf	Lower Oligocene	Sapindaceae	Acer	Acer_sp	deciduous	NA	lobed	dentate	palmate	NA	NA	NA	NA	no	no	no	no	no	no	no
SNSD, MMG_PB	Sf._8392	1			Seifhennersdorf	Lower Oligocene	Sapindaceae	Acer	Acer_sp	deciduous	NA	lobed	dentate	palmate	NA	NA	NA	NA	no	no	no	no	no	no	no
SNSD, MMG_PB	Sf._8393	1			Seifhennersdorf	Lower Oligocene	Sapindaceae	Acer	Acer_sp	deciduous	NA	lobed	dentate	palmate	NA	NA	NA	NA	no	no	no	no	no	no	no
SNSD, MMG_PB	Sf._8394	1			Seifhennersdorf	Lower Oligocene	Sapindaceae	Acer	Acer_sp	deciduous	NA	NA	NA	NA	NA	NA	NA	NA	yes	yes	yes	no	no	no	no	5	14
SNSD, MMG_PB	Sf._8395	1			Seifhennersdorf	Lower Oligocene	Sapindaceae	Acer	Acer_sp	deciduous	NA	lobed	dentate	palmate	non-looped	P	NA	P	no	no	no	no	no	no	no
SNSD, MMG_PB	Sf._8398	1			Seifhennersdorf	Lower Oligocene	Sapindaceae	Acer	Acer_sp	deciduous	NA	lobed	dentate	palmate	NA	NA	NA	NA	no	no	no	no	no	no	no
SNSD, MMG_PB	Sf._8399	1			Seifhennersdorf	Lower Oligocene	Sapindaceae	Acer	Acer_sp	deciduous	NA	lobed	dentate	palmate	NA	NA	NA	NA	no	no	no	no	no	no	no
SNSD, MMG_PB	Sf._8418	1			Seifhennersdorf	Lower Oligocene	Sapindaceae	Acer	Acer_sp	deciduous	NA	lobed	dentate	palmate	NA	NA	NA	NA	no	no	no	no	no	no	no
SNSD, MMG_PB	Sf._8579	1			Seifhennersdorf	Lower Oligocene	Sapindaceae	Acer	Acer_sp	deciduous	NA	lobed	dentate	palmate	NA	NA	NA	NA	no	no	no	no	no	no	no
SNSD, MMG_PB	Sf._8639	1			Seifhennersdorf	Lower Oligocene	Sapindaceae	Acer	Acer_sp	deciduous	NA	lobed	dentate	palmate	NA	NA	NA	NA	no	no	no	no	no	no	no
SNSD, MMG_PB	Sf._8658	1			Seifhennersdorf	Lower Oligocene	Sapindaceae	Acer	Acer_sp	deciduous	NA	lobed	dentate	palmate	NA	NA	NA	NA	no	no	no	no	no	no	no
SNSD, MMG_PB	Sf._8691	1			Seifhennersdorf	Lower Oligocene	Sapindaceae	Acer	Acer_sp	deciduous	NA	lobed	dentate	palmate	NA	NA	NA	NA	no	no	no	no	no	no	no
SNSD, MMG_PB	Sf._8	1			Seifhennersdorf	Lower Oligocene	Simaroubaceae	Ailanthus	Ailanthus_prescheri	deciduous	tree	unlobed	dentate	pinnate	non-looped	F	E,F	F	no	no	no	no	no	no	no
SNSD, MMG_PB	Sf._462	1			Seifhennersdorf	Lower Oligocene	Simaroubaceae	Ailanthus	Ailanthus_prescheri	deciduous	tree	unlobed	dentate	pinnate	non-looped	F	E,F	F	no	no	no	no	no	no	no
SNSD, MMG_PB	Sf._968:1,2	1			Seifhennersdorf	Lower Oligocene	Simaroubaceae	Ailanthus	Ailanthus_prescheri	deciduous	tree	unlobed	dentate	pinnate	non-looped	F	E,F	F	no	no	no	no	no	no	no
SNSD, MMG_PB	Sf._1256:1,2	1			Seifhennersdorf	Lower Oligocene	Simaroubaceae	Ailanthus	Ailanthus_prescheri	deciduous	tree	unlobed	dentate	pinnate	non-looped	F	E,F	F	no	no	no	no	no	no	no
SNSD, MMG_PB	Sf._1341	1			Seifhennersdorf	Lower Oligocene	Simaroubaceae	Ailanthus	Ailanthus_prescheri	deciduous	tree	unlobed	dentate	pinnate	non-looped	F	E,F	F	no	no	no	no	no	no	no
SNSD, MMG_PB	Sf._1415	1			Seifhennersdorf	Lower Oligocene	Simaroubaceae	Ailanthus	Ailanthus_prescheri	deciduous	tree	unlobed	dentate	pinnate	non-looped	F	E,F	F	no	no	no	no	no	no	no
SNSD, MMG_PB	Sf._2244	1			Seifhennersdorf	Lower Oligocene	Simaroubaceae	Ailanthus	Ailanthus_prescheri	deciduous	tree	unlobed	dentate	pinnate	non-looped	F	E,F	F	no	no	no	no	no	no	no
SNSD, MMG_PB	Sf._2261:1,2	1			Seifhennersdorf	Lower Oligocene	Simaroubaceae	Ailanthus	Ailanthus_prescheri	deciduous	tree	unlobed	dentate	pinnate	NA	NA	E,F	NA	no	no	no	no	no	no	no
SNSD, MMG_PB	Sf._2265	1			Seifhennersdorf	Lower Oligocene	Simaroubaceae	Ailanthus	Ailanthus_prescheri	deciduous	tree	unlobed	dentate	pinnate	non-looped	F	E,F	F	no	no	no	no	no	no	no
SNSD, MMG_PB	Sf._2286	1			Seifhennersdorf	Lower Oligocene	Simaroubaceae	Ailanthus	Ailanthus_prescheri	deciduous	tree	unlobed	dentate	pinnate	non-looped	F	E,F	F	no	no	no	no	no	no	no
SNSD, MMG_PB	Sf._2299:1,2	1			Seifhennersdorf	Lower Oligocene	Simaroubaceae	Ailanthus	Ailanthus_prescheri	deciduous	tree	unlobed	dentate	pinnate	non-looped	F	E,F	F	no	no	no	no	no	no	no
SNSD, MMG_PB	Sf._2300:1,2	1			Seifhennersdorf	Lower Oligocene	Simaroubaceae	Ailanthus	Ailanthus_prescheri	deciduous	tree	unlobed	dentate	pinnate	NA	NA	E,F	NA	no	no	no	no	no	no	no
SNSD, MMG_PB	Sf._2302	1			Seifhennersdorf	Lower Oligocene	Simaroubaceae	Ailanthus	Ailanthus_prescheri	deciduous	tree	unlobed	dentate	pinnate	non-looped	F	E,F	F	no	no	no	no	no	no	no
SNSD, MMG_PB	Sf._2304:1,2	1			Seifhennersdorf	Lower Oligocene	Simaroubaceae	Ailanthus	Ailanthus_prescheri	deciduous	tree	unlobed	dentate	pinnate	non-looped	F	E,F	F	no	no	no	no	no	no	no
SNSD, MMG_PB	Sf._2308	1			Seifhennersdorf	Lower Oligocene	Simaroubaceae	Ailanthus	Ailanthus_prescheri	deciduous	tree	unlobed	dentate	pinnate	non-looped	F	E,F	F	no	no	no	no	no	no	no
SNSD, MMG_PB	Sf._2431	1			Seifhennersdorf	Lower Oligocene	Simaroubaceae	Ailanthus	Ailanthus_prescheri	deciduous	tree	unlobed	dentate	pinnate	non-looped	F	E,F	F	no	no	no	no	no	no	no
SNSD, MMG_PB	Sf._4509	1	1	1	Seifhennersdorf	Lower Oligocene	Simaroubaceae	Ailanthus	Ailanthus_prescheri	deciduous	tree	unlobed	dentate	pinnate	non-looped	F	E,F	F	no	no	no	no	no	no	no
SNSD, MMG_PB	Sf._5573/6519	1	1	1	Seifhennersdorf	Lower Oligocene	Simaroubaceae	Ailanthus	Ailanthus_prescheri	deciduous	tree	unlobed	dentate	pinnate	NA	NA	E,F	NA	no	no	no	no	no	no	no
SNSD, MMG_PB	Sf._6532	1			Seifhennersdorf	Lower Oligocene	Simaroubaceae	Ailanthus	Ailanthus_prescheri	deciduous	tree	unlobed	dentate	pinnate	non-looped	F	E,F	F	no	no	no	no	no	no	no
SNSD, MMG_PB	Sf._6520a/6528	1			Seifhennersdorf	Lower Oligocene	Simaroubaceae	Ailanthus	Ailanthus_prescheri	deciduous	tree	unlobed	dentate	pinnate	non-looped	F	E,F	F	no	no	no	no	no	no	no
SNSD, MMG_PB	Sf._6523	1			Seifhennersdorf	Lower Oligocene	Simaroubaceae	Ailanthus	Ailanthus_prescheri	deciduous	tree	unlobed	dentate	pinnate	NA	NA	E,F	NA	no	no	no	no	no	no	no
SNSD, MMG_PB	Sf._6524	1			Seifhennersdorf	Lower Oligocene	Simaroubaceae	Ailanthus	Ailanthus_prescheri	deciduous	tree	unlobed	dentate	pinnate	non-looped	F	E,F	F	no	no	no	no	no	no	no
SNSD, MMG_PB	Sf._6525	1			Seifhennersdorf	Lower Oligocene	Simaroubaceae	Ailanthus	Ailanthus_prescheri	deciduous	tree	unlobed	dentate	pinnate	non-looped	F	E,F	F	no	no	no	no	no	no	no
SNSD, MMG_PB	Sf._6526	1			Seifhennersdorf	Lower Oligocene	Simaroubaceae	Ailanthus	Ailanthus_prescheri	deciduous	tree	unlobed	dentate	pinnate	non-looped	F	E,F	F	no	no	no	no	no	no	no
SNSD, MMG_PB	Sf._6529	1			Seifhennersdorf	Lower Oligocene	Simaroubaceae	Ailanthus	Ailanthus_prescheri	deciduous	tree	unlobed	dentate	pinnate	non-looped	F	E,F	F	no	no	no	no	no	no	no
SNSD, MMG_PB	Sf._6533	1			Seifhennersdorf	Lower Oligocene	Simaroubaceae	Ailanthus	Ailanthus_prescheri	deciduous	tree	unlobed	dentate	pinnate	non-looped	F	E,F	F	no	no	no	no	no	no	no
SNSD, MMG_PB	Sf._8287 (A2/a/7)	1			Seifhennersdorf	Lower Oligocene	Simaroubaceae	Ailanthus	Ailanthus_prescheri	deciduous	tree	unlobed	dentate	pinnate	non-looped	F	E,F	F	no	no	no	no	no	no	no
SNSD, MMG_PB	Sf._8407	1			Seifhennersdorf	Lower Oligocene	Simaroubaceae	Ailanthus	Ailanthus_prescheri	deciduous	tree	unlobed	dentate	pinnate	non-looped	F	E,F	F	no	no	no	no	no	no	no
SNSD, MMG_PB	Sf._8592	1			Seifhennersdorf	Lower Oligocene	Simaroubaceae	Ailanthus	Ailanthus_prescheri	deciduous	tree	unlobed	dentate	pinnate	non-looped	F	E,F	F	no	no	no	no	no	no	no
SNSD, MMG_PB	Sf._2313	1	1	1	Seifhennersdorf	Lower Oligocene	Betulaceae	Alnus	Alnus_gaudinii	deciduous	tree	unlobed	dentate	pinnate	looped	NA	E	E	no	no	no	no	no	no	no
SNSD, MMG_PB	Sf._2715	1	1		Seifhennersdorf	Lower Oligocene	Betulaceae	Alnus	Alnus_gaudinii	deciduous	tree	unlobed	dentate	pinnate	looped	NA	E	E	no	no	no	no	no	no	no
SNSD, MMG_PB	Sf._4443	1			Seifhennersdorf	Lower Oligocene	Betulaceae	Alnus	Alnus_gaudinii	deciduous	tree	unlobed	dentate	pinnate	looped	NA	E	E	no	no	no	no	no	no	no
SNSD, MMG_PB	Sf._4465	1	1		Seifhennersdorf	Lower Oligocene	Betulaceae	Alnus	Alnus_gaudinii	deciduous	tree	unlobed	dentate	pinnate	looped	E	E	E	no	no	no	no	no	no	no
SNSD, MMG_PB	Sf._4555	1			Seifhennersdorf	Lower Oligocene	Betulaceae	Alnus	Alnus_gaudinii	deciduous	tree	unlobed	dentate	pinnate	looped	NA	E	E	no	no	no	no	no	no	no
SNSD, MMG_PB	Sf._5331:1,2	1	1	1	Seifhennersdorf	Lower Oligocene	Betulaceae	Alnus	Alnus_gaudinii	deciduous	tree	unlobed	dentate	pinnate	looped	NA	E	E	no	no	no	no	no	no	no
SNSD, MMG_PB	Sf._5352	1			Seifhennersdorf	Lower Oligocene	Betulaceae	Alnus	Alnus_gaudinii	deciduous	tree	unlobed	dentate	pinnate	looped	NA	E	E	no	no	no	no	no	no	no
SNSD, MMG_PB	Sf._6058	1	1		Seifhennersdorf	Lower Oligocene	Betulaceae	Alnus	Alnus_gaudinii	deciduous	tree	unlobed	dentate	pinnate	looped	E	E	E	no	no	no	no	no	no	no
SNSD, MMG_PB	Sf._6160	1	1	1	Seifhennersdorf	Lower Oligocene	Betulaceae	Alnus	Alnus_gaudinii	deciduous	tree	unlobed	dentate	pinnate	looped	NA	E	E	no	no	no	no	no	no	no
SNSD, MMG_PB	Sf._6197	1	1		Seifhennersdorf	Lower Oligocene	Betulaceae	Alnus	Alnus_gaudinii	deciduous	tree	unlobed	dentate	pinnate	looped	NA	E	E	no	no	no	no	no	no	no
SNSD, MMG_PB	Sf._6226:1,2	1			Seifhennersdorf	Lower Oligocene	Betulaceae	Alnus	Alnus_gaudinii	deciduous	tree	unlobed	dentate	pinnate	looped	NA	E	E	no	no	no	no	no	no	no
SNSD, MMG_PB	Sf._6406	1			Seifhennersdorf	Lower Oligocene	Betulaceae	Alnus	Alnus_gaudinii	deciduous	tree	unlobed	dentate	pinnate	looped	NA	E	E	no	no	no	no	no	no	no
SNSD, MMG_PB	Sf._6411	1	1		Seifhennersdorf	Lower Oligocene	Betulaceae	Alnus	Alnus_gaudinii	deciduous	tree	unlobed	dentate	pinnate	looped	NA	E	E	no	no	no	no	no	no	no
SNSD, MMG_PB	Sf._6426	1	1		Seifhennersdorf	Lower Oligocene	Betulaceae	Alnus	Alnus_gaudinii	deciduous	tree	unlobed	dentate	pinnate	looped	E	E	E	no	no	no	no	no	no	no
SNSD, MMG_PB	Sf._6603	1			Seifhennersdorf	Lower Oligocene	Betulaceae	Alnus	Alnus_gaudinii	deciduous	tree	unlobed	dentate	pinnate	looped	NA	E	E	no	no	no	no	no	no	no
SNSD, MMG_PB	Sf._6608	1	1	1	Seifhennersdorf	Lower Oligocene	Betulaceae	Alnus	Alnus_gaudinii	deciduous	tree	unlobed	dentate	pinnate	looped	NA	E	E	no	no	no	no	no	no	no
SNSD, MMG_PB	Sf._7463/5541	1	1		Seifhennersdorf	Lower Oligocene	Betulaceae	Alnus	Alnus_gaudinii	deciduous	tree	unlobed	dentate	pinnate	looped	NA	E	E	no	no	no	no	no	no	no
SNSD, MMG_PB	Sf._8281	1			Seifhennersdorf	Lower Oligocene	Betulaceae	Alnus	Alnus_gaudinii	deciduous	tree	unlobed	dentate	pinnate	looped	NA	E	E	no	no	no	no	no	no	no
SNSD, MMG_PB	Sf._15	1	1		Seifhennersdorf	Lower Oligocene	Betulaceae	Alnus	Alnus_phocaeensis	deciduous	tree	unlobed	dentate	pinnate	non-looped	F	F	F	no	no	no	no	no	no	no
SNSD, MMG_PB	Sf._1267	1			Seifhennersdorf	Lower Oligocene	Betulaceae	Alnus	Alnus_phocaeensis	deciduous	tree	unlobed	dentate	pinnate	non-looped	F	F	F	no	no	no	no	no	no	no
SNSD, MMG_PB	Sf._3299	1	1	1	Seifhennersdorf	Lower Oligocene	Betulaceae	Alnus	Alnus_phocaeensis	deciduous	tree	unlobed	dentate	pinnate	non-looped	F	F	F	no	no	no	no	no	no	no
SNSD, MMG_PB	Sf._3507:1,2	1	1	1	Seifhennersdorf	Lower Oligocene	Betulaceae	Alnus	Alnus_phocaeensis	deciduous	tree	unlobed	dentate	pinnate	non-looped	F	F	F	no	no	no	no	no	no	no
SNSD, MMG_PB	Sf._4699	1			Seifhennersdorf	Lower Oligocene	Betulaceae	Alnus	Alnus_phocaeensis	deciduous	tree	unlobed	dentate	pinnate	non-looped	F	F	F	no	no	no	no	no	no	no
SNSD, MMG_PB	Sf._7872	1	1		Seifhennersdorf	Lower Oligocene	Betulaceae	Alnus	Alnus_phocaeensis	deciduous	tree	unlobed	dentate	pinnate	non-looped	F	F	F	no	no	no	no	no	no	no
SNSD, MMG_PB	Sf._2693	1	1	1	Seifhennersdorf	Lower Oligocene	Vitaceae	Ampelopsis	Ampelopsis_hibschii	deciduous	shrub_climber_scrambler	NA	NA	NA	NA	NA	F,J	NA	no	no	no	no	no	no	no
SNSD, MMG_PB	Sf._3545	1			Seifhennersdorf	Lower Oligocene	Vitaceae	Ampelopsis	Ampelopsis_hibschii	deciduous	shrub_climber_scrambler	NA	NA	NA	NA	NA	F,J	NA	no	no	no	no	no	no	no
SNSD, MMG_PB	Sf._8647	1			Seifhennersdorf	Lower Oligocene	Vitaceae	Ampelopsis	Ampelopsis_hibschii	deciduous	shrub_climber_scrambler	NA	NA	NA	NA	NA	F,J	NA	no	no	no	no	no	no	no
SNSD, MMG_PB	Sf._1352	1			Seifhennersdorf	Lower Oligocene	?Lythraceae	Apocynophyllum	Apocynophyllum_neriifolium	deciduous	shrub_climber_scrambler	unlobed	entire	pinnate	looped	NA	A	A	no	no	no	no	no	no	no
SNSD, MMG_PB	Sf._2740	1			Seifhennersdorf	Lower Oligocene	?Lythraceae	Apocynophyllum	Apocynophyllum_neriifolium	deciduous	shrub_climber_scrambler	unlobed	entire	pinnate	looped	A	A	A	no	no	no	no	no	no	no
SNSD, MMG_PB	Sf._2874	1			Seifhennersdorf	Lower Oligocene	?Lythraceae	Apocynophyllum	Apocynophyllum_neriifolium	deciduous	shrub_climber_scrambler	unlobed	entire	pinnate	looped	A	A	A	no	no	no	no	no	no	no
SNSD, MMG_PB	Sf._6097	1			Seifhennersdorf	Lower Oligocene	?Lythraceae	Apocynophyllum	Apocynophyllum_neriifolium	deciduous	shrub_climber_scrambler	unlobed	entire	pinnate	looped	A	A	A	no	no	no	no	no	no	no
SNSD, MMG_PB	Sf._7547:1,2	1			Seifhennersdorf	Lower Oligocene	?Lythraceae	Apocynophyllum	Apocynophyllum_neriifolium	deciduous	shrub_climber_scrambler	unlobed	entire	pinnate	looped	A	A	A	no	no	no	no	no	no	no
SNSD, MMG_PB	Sf._8277	1	1	1	Seifhennersdorf	Lower Oligocene	?Lythraceae	Apocynophyllum	Apocynophyllum_neriifolium	deciduous	shrub_climber_scrambler	unlobed	entire	pinnate	looped	A	A	A	no	no	no	no	no	no	no
SNSD, MMG_PB	Sf._669b	1			Seifhennersdorf	Lower Oligocene	Betulaceae	NA	Betulaceae_indet	deciduous	tree	unlobed	dentate	pinnate	non-looped	F	F	F	no	no	no	no	no	no	no
SNSD, MMG_PB	Sf._852:1,2b	1			Seifhennersdorf	Lower Oligocene	Betulaceae	NA	Betulaceae_indet	deciduous	tree	unlobed	dentate	pinnate	non-looped	F	F	F	no	no	no	no	no	no	no
SNSD, MMG_PB	Sf._958	1			Seifhennersdorf	Lower Oligocene	Betulaceae	NA	Betulaceae_indet	deciduous	tree	unlobed	dentate	pinnate	non-looped	F	F	F	no	no	no	no	no	no	no
SNSD, MMG_PB	Sf._1323	1	1		Seifhennersdorf	Lower Oligocene	Betulaceae	NA	Betulaceae_indet	deciduous	tree	NA	NA	NA	NA	NA	F	NA	no	no	no	no	no	no	no
SNSD, MMG_PB	Sf._1373:1,2b	1			Seifhennersdorf	Lower Oligocene	Betulaceae	NA	Betulaceae_indet	deciduous	tree	unlobed	dentate	pinnate	non-looped	F	F	F	no	no	no	no	no	no	no
SNSD, MMG_PB	Sf._1614:1,2	1			Seifhennersdorf	Lower Oligocene	Betulaceae	NA	Betulaceae_indet	deciduous	tree	NA	NA	NA	NA	NA	F	NA	no	no	no	no	no	no	no
SNSD, MMG_PB	Sf._1640:1,2 (I)	1			Seifhennersdorf	Lower Oligocene	Betulaceae	NA	Betulaceae_indet	deciduous	tree	unlobed	dentate	pinnate	non-looped	F	F	F	no	no	no	no	no	no	no
SNSD, MMG_PB	Sf._1648 (II)	1			Seifhennersdorf	Lower Oligocene	Betulaceae	NA	Betulaceae_indet	deciduous	tree	unlobed	dentate	pinnate	non-looped	F	F	F	no	no	no	no	no	no	no
SNSD, MMG_PB	Sf._1703 (II)	1	1		Seifhennersdorf	Lower Oligocene	Betulaceae	NA	Betulaceae_indet	deciduous	tree	unlobed	dentate	pinnate	non-looped	F	F	F	no	no	no	no	no	no	no
SNSD, MMG_PB	Sf._2053	1			Seifhennersdorf	Lower Oligocene	Betulaceae	NA	Betulaceae_indet	deciduous	tree	NA	NA	NA	NA	NA	F	NA	yes	yes	no	no	no	no	no	2
SNSD, MMG_PB	Sf._2083	1	1		Seifhennersdorf	Lower Oligocene	Betulaceae	NA	Betulaceae_indet	deciduous	tree	unlobed	dentate	pinnate	non-looped	F	F	F	no	no	no	no	no	no	no
SNSD, MMG_PB	Sf._2088	1			Seifhennersdorf	Lower Oligocene	Betulaceae	NA	Betulaceae_indet	deciduous	tree	unlobed	dentate	pinnate	non-looped	F	F	F	no	no	no	no	no	no	no
SNSD, MMG_PB	Sf._2111	1			Seifhennersdorf	Lower Oligocene	Betulaceae	NA	Betulaceae_indet	deciduous	tree	unlobed	dentate	pinnate	non-looped	F	F	F	no	no	no	no	no	no	no
SNSD, MMG_PB	Sf._2141	1			Seifhennersdorf	Lower Oligocene	Betulaceae	NA	Betulaceae_indet	deciduous	tree	unlobed	dentate	pinnate	non-looped	F	F	F	no	no	no	no	no	no	no
SNSD, MMG_PB	Sf._2174	1			Seifhennersdorf	Lower Oligocene	Betulaceae	NA	Betulaceae_indet	deciduous	tree	unlobed	dentate	pinnate	non-looped	F	F	F	no	no	no	no	no	no	no
SNSD, MMG_PB	Sf._2180	1	1		Seifhennersdorf	Lower Oligocene	Betulaceae	NA	Betulaceae_indet	deciduous	tree	NA	NA	NA	NA	NA	F	NA	no	no	no	no	no	no	no
SNSD, MMG_PB	Sf._2201	1			Seifhennersdorf	Lower Oligocene	Betulaceae	NA	Betulaceae_indet	deciduous	tree	unlobed	dentate	pinnate	non-looped	F	F	F	no	no	no	no	no	no	no
SNSD, MMG_PB	Sf._2396	1			Seifhennersdorf	Lower Oligocene	Betulaceae	NA	Betulaceae_indet	deciduous	tree	unlobed	dentate	pinnate	non-looped	F	F	F	no	no	no	no	no	no	no
SNSD, MMG_PB	Sf._2420	1			Seifhennersdorf	Lower Oligocene	Betulaceae	NA	Betulaceae_indet	deciduous	tree	unlobed	dentate	pinnate	non-looped	F	F	F	yes	yes	no	no	no	no	no	2
SNSD, MMG_PB	Sf._2943:1,2	1	1		Seifhennersdorf	Lower Oligocene	Betulaceae	NA	Betulaceae_indet	deciduous	tree	unlobed	dentate	pinnate	non-looped	F	F	F	yes	yes	no	no	no	no	no	2
SNSD, MMG_PB	Sf._2954	1	1		Seifhennersdorf	Lower Oligocene	Betulaceae	NA	Betulaceae_indet	deciduous	tree	unlobed	dentate	pinnate	non-looped	F	F	F	no	no	no	no	no	no	no
SNSD, MMG_PB	Sf._3313	1	1	1	Seifhennersdorf	Lower Oligocene	Betulaceae	NA	Betulaceae_indet	deciduous	tree	unlobed	dentate	pinnate	non-looped	F	F	F	no	no	no	no	no	no	no
SNSD, MMG_PB	Sf._3432:1,2	1			Seifhennersdorf	Lower Oligocene	Betulaceae	NA	Betulaceae_indet	deciduous	tree	unlobed	dentate	pinnate	non-looped	F	F	F	yes	yes	no	no	no	no	no	2
SNSD, MMG_PB	Sf._4680	1			Seifhennersdorf	Lower Oligocene	Betulaceae	NA	Betulaceae_indet	deciduous	tree	NA	NA	NA	NA	NA	F	NA	no	no	no	no	no	no	no
SNSD, MMG_PB	Sf._4688	1			Seifhennersdorf	Lower Oligocene	Betulaceae	NA	Betulaceae_indet	deciduous	tree	NA	NA	NA	NA	NA	F	NA	no	no	no	no	no	no	no
SNSD, MMG_PB	Sf._4695	1			Seifhennersdorf	Lower Oligocene	Betulaceae	NA	Betulaceae_indet	deciduous	tree	unlobed	dentate	pinnate	non-looped	F	F	F	no	no	no	no	no	no	no
SNSD, MMG_PB	Sf._4696	1			Seifhennersdorf	Lower Oligocene	Betulaceae	NA	Betulaceae_indet	deciduous	tree	unlobed	dentate	pinnate	non-looped	F	F	F	no	no	no	no	no	no	no
SNSD, MMG_PB	Sf._4704	1			Seifhennersdorf	Lower Oligocene	Betulaceae	NA	Betulaceae_indet	deciduous	tree	unlobed	dentate	pinnate	non-looped	F	F	F	yes	yes	yes	no	no	no	no	2	12
SNSD, MMG_PB	Sf._4715:1,2	1			Seifhennersdorf	Lower Oligocene	Betulaceae	NA	Betulaceae_indet	deciduous	tree	unlobed	dentate	pinnate	non-looped	F	F	F	no	no	no	no	no	no	no
SNSD, MMG_PB	Sf._4721	1			Seifhennersdorf	Lower Oligocene	Betulaceae	NA	Betulaceae_indet	deciduous	tree	unlobed	dentate	pinnate	non-looped	F	F	F	no	no	no	no	no	no	no
SNSD, MMG_PB	Sf._4723	1			Seifhennersdorf	Lower Oligocene	Betulaceae	NA	Betulaceae_indet	deciduous	tree	NA	NA	NA	NA	NA	F	NA	no	no	no	no	no	no	no
SNSD, MMG_PB	Sf._4728	1			Seifhennersdorf	Lower Oligocene	Betulaceae	NA	Betulaceae_indet	deciduous	tree	unlobed	dentate	pinnate	non-looped	F	F	F	no	no	no	no	no	no	no
SNSD, MMG_PB	Sf._4730	1			Seifhennersdorf	Lower Oligocene	Betulaceae	NA	Betulaceae_indet	deciduous	tree	NA	NA	NA	NA	NA	F	NA	no	no	no	no	no	no	no
SNSD, MMG_PB	Sf._4732	1			Seifhennersdorf	Lower Oligocene	Betulaceae	NA	Betulaceae_indet	deciduous	tree	NA	NA	NA	NA	NA	F	NA	no	no	no	no	no	no	no
SNSD, MMG_PB	Sf._4733	1			Seifhennersdorf	Lower Oligocene	Betulaceae	NA	Betulaceae_indet	deciduous	tree	unlobed	dentate	pinnate	non-looped	F	F	F	no	no	no	no	no	no	no
SNSD, MMG_PB	Sf._4735	1			Seifhennersdorf	Lower Oligocene	Betulaceae	NA	Betulaceae_indet	deciduous	tree	unlobed	dentate	pinnate	non-looped	F	F	F	no	no	no	no	no	no	no
SNSD, MMG_PB	Sf._4743	1	1		Seifhennersdorf	Lower Oligocene	Betulaceae	NA	Betulaceae_indet	deciduous	tree	unlobed	dentate	pinnate	non-looped	F	F	F	no	no	no	no	no	no	no
SNSD, MMG_PB	Sf._4753	1	1		Seifhennersdorf	Lower Oligocene	Betulaceae	NA	Betulaceae_indet	deciduous	tree	unlobed	dentate	pinnate	non-looped	F	F	F	no	no	no	no	no	no	no
SNSD, MMG_PB	Sf._4765	1			Seifhennersdorf	Lower Oligocene	Betulaceae	NA	Betulaceae_indet	deciduous	tree	unlobed	dentate	pinnate	non-looped	F	F	F	yes	yes	no	no	no	no	no	2
SNSD, MMG_PB	Sf._4778	1	1		Seifhennersdorf	Lower Oligocene	Betulaceae	NA	Betulaceae_indet	deciduous	tree	unlobed	dentate	pinnate	non-looped	F	F	F	no	no	no	no	no	no	no
SNSD, MMG_PB	Sf._4813	1	1		Seifhennersdorf	Lower Oligocene	Betulaceae	NA	Betulaceae_indet	deciduous	tree	unlobed	dentate	pinnate	non-looped	F	F	F	no	no	no	no	no	no	no
SNSD, MMG_PB	Sf._4817	1	1		Seifhennersdorf	Lower Oligocene	Betulaceae	NA	Betulaceae_indet	deciduous	tree	unlobed	dentate	pinnate	non-looped	F	F	F	no	no	no	no	no	no	no
SNSD, MMG_PB	Sf._4822	1			Seifhennersdorf	Lower Oligocene	Betulaceae	NA	Betulaceae_indet	deciduous	tree	unlobed	dentate	pinnate	non-looped	F	F	F	yes	yes	no	no	no	no	no	2
SNSD, MMG_PB	Sf._4830	1			Seifhennersdorf	Lower Oligocene	Betulaceae	NA	Betulaceae_indet	deciduous	tree	unlobed	dentate	pinnate	non-looped	F	F	F	no	no	no	no	no	no	no
SNSD, MMG_PB	Sf._4864a	1	1		Seifhennersdorf	Lower Oligocene	Betulaceae	NA	Betulaceae_indet	deciduous	tree	unlobed	dentate	pinnate	non-looped	F	F	F	no	no	no	no	no	no	no
SNSD, MMG_PB	Sf._4916	1			Seifhennersdorf	Lower Oligocene	Betulaceae	NA	Betulaceae_indet	deciduous	tree	unlobed	dentate	pinnate	non-looped	F	F	F	no	no	no	no	no	no	no
SNSD, MMG_PB	Sf._4946	1			Seifhennersdorf	Lower Oligocene	Betulaceae	NA	Betulaceae_indet	deciduous	tree	unlobed	dentate	pinnate	non-looped	F	F	F	no	no	no	no	no	no	no
SNSD, MMG_PB	Sf._4986:1,2	1			Seifhennersdorf	Lower Oligocene	Betulaceae	NA	Betulaceae_indet	deciduous	tree	unlobed	dentate	pinnate	non-looped	F	F	F	no	no	no	no	no	no	no
SNSD, MMG_PB	Sf._5033	1			Seifhennersdorf	Lower Oligocene	Betulaceae	NA	Betulaceae_indet	deciduous	tree	unlobed	dentate	pinnate	non-looped	F	F	F	no	no	no	no	no	no	no
SNSD, MMG_PB	Sf._5056:1,2	1	1		Seifhennersdorf	Lower Oligocene	Betulaceae	NA	Betulaceae_indet	deciduous	tree	NA	NA	NA	NA	NA	F	NA	no	no	no	no	no	no	no
SNSD, MMG_PB	Sf._5130	1	1		Seifhennersdorf	Lower Oligocene	Betulaceae	NA	Betulaceae_indet	deciduous	tree	unlobed	dentate	pinnate	non-looped	F	F	F	no	no	no	no	no	no	no
SNSD, MMG_PB	Sf._5165	1			Seifhennersdorf	Lower Oligocene	Betulaceae	NA	Betulaceae_indet	deciduous	tree	unlobed	dentate	pinnate	non-looped	F	F	F	no	no	no	no	no	no	no
SNSD, MMG_PB	Sf._5196	1			Seifhennersdorf	Lower Oligocene	Betulaceae	NA	Betulaceae_indet	deciduous	tree	unlobed	dentate	pinnate	non-looped	F	F	F	no	no	no	no	no	no	no
SNSD, MMG_PB	Sf._5281	1	1		Seifhennersdorf	Lower Oligocene	Betulaceae	NA	Betulaceae_indet	deciduous	tree	unlobed	dentate	pinnate	non-looped	F	F	F	no	no	no	no	no	no	no
SNSD, MMG_PB	Sf._5381b	1	1		Seifhennersdorf	Lower Oligocene	Betulaceae	NA	Betulaceae_indet	deciduous	tree	unlobed	dentate	pinnate	non-looped	F	F	F	no	no	no	no	no	no	no
SNSD, MMG_PB	Sf._6085b	1			Seifhennersdorf	Lower Oligocene	Betulaceae	NA	Betulaceae_indet	deciduous	tree	unlobed	dentate	pinnate	non-looped	F	F	F	no	no	no	no	no	no	no
SNSD, MMG_PB	Sf._8098	1			Seifhennersdorf	Lower Oligocene	Betulaceae	NA	Betulaceae_indet	deciduous	tree	unlobed	dentate	pinnate	non-looped	F	F	F	no	no	no	no	no	no	no
SNSD, MMG_PB	Sf._669:1,4a	1	1	1	Seifhennersdorf	Lower Oligocene	Betulaceae	Betula	Betula_alboides	deciduous	tree	unlobed	dentate	pinnate	non-looped	F	F	F	yes	yes	no	no	no	no	no	2
SNSD, MMG_PB	Sf._1371:1,2	1			Seifhennersdorf	Lower Oligocene	Betulaceae	Betula	Betula_alboides	deciduous	tree	unlobed	dentate	pinnate	non-looped	F	F	F	no	no	no	no	no	no	no
SNSD, MMG_PB	Sf._1643 (II)	1			Seifhennersdorf	Lower Oligocene	Betulaceae	Betula	Betula_alboides	deciduous	tree	unlobed	dentate	pinnate	non-looped	F	F	F	no	no	no	no	no	no	no
SNSD, MMG_PB	Sf._1647	1			Seifhennersdorf	Lower Oligocene	Betulaceae	Betula	Betula_alboides	deciduous	tree	unlobed	dentate	pinnate	non-looped	F	F	F	no	no	no	no	no	no	no
SNSD, MMG_PB	Sf._1705	1	1	1	Seifhennersdorf	Lower Oligocene	Betulaceae	Betula	Betula_alboides	deciduous	tree	unlobed	dentate	pinnate	non-looped	F	F	F	no	no	no	no	no	no	no
SNSD, MMG_PB	Sf._1832	1	1	1	Seifhennersdorf	Lower Oligocene	Betulaceae	Betula	Betula_alboides	deciduous	tree	unlobed	dentate	pinnate	non-looped	F	F	F	no	no	no	no	no	no	no
SNSD, MMG_PB	Sf._1911	1	1		Seifhennersdorf	Lower Oligocene	Betulaceae	Betula	Betula_alboides	deciduous	tree	unlobed	dentate	pinnate	non-looped	F	F	F	no	no	no	no	no	no	no
SNSD, MMG_PB	Sf._1998	1			Seifhennersdorf	Lower Oligocene	Betulaceae	Betula	Betula_alboides	deciduous	tree	unlobed	dentate	pinnate	non-looped	F	F	F	no	no	no	no	no	no	no
SNSD, MMG_PB	Sf._2140	1	1		Seifhennersdorf	Lower Oligocene	Betulaceae	Betula	Betula_alboides	deciduous	tree	unlobed	dentate	pinnate	non-looped	F	F	F	no	no	no	no	no	no	no
SNSD, MMG_PB	Sf._2171	1	1		Seifhennersdorf	Lower Oligocene	Betulaceae	Betula	Betula_alboides	deciduous	tree	unlobed	dentate	pinnate	non-looped	F	F	F	no	no	no	no	no	no	no
SNSD, MMG_PB	Sf._2178	1			Seifhennersdorf	Lower Oligocene	Betulaceae	Betula	Betula_alboides	deciduous	tree	unlobed	dentate	pinnate	non-looped	F	F	F	no	no	no	no	no	no	no
SNSD, MMG_PB	Sf._2197	1			Seifhennersdorf	Lower Oligocene	Betulaceae	Betula	Betula_alboides	deciduous	tree	unlobed	dentate	pinnate	non-looped	F	F	F	no	no	no	no	no	no	no
SNSD, MMG_PB	Sf._2198	1			Seifhennersdorf	Lower Oligocene	Betulaceae	Betula	Betula_alboides	deciduous	tree	unlobed	dentate	pinnate	non-looped	F	F	F	no	no	no	no	no	no	no
SNSD, MMG_PB	Sf._2200	1			Seifhennersdorf	Lower Oligocene	Betulaceae	Betula	Betula_alboides	deciduous	tree	unlobed	dentate	pinnate	non-looped	F	F	F	no	no	no	no	no	no	no
SNSD, MMG_PB	Sf._2210	1			Seifhennersdorf	Lower Oligocene	Betulaceae	Betula	Betula_alboides	deciduous	tree	unlobed	dentate	pinnate	non-looped	F	F	F	no	no	no	no	no	no	no
SNSD, MMG_PB	Sf._2217	1			Seifhennersdorf	Lower Oligocene	Betulaceae	Betula	Betula_alboides	deciduous	tree	unlobed	dentate	pinnate	non-looped	F	F	F	no	no	no	no	no	no	no
SNSD, MMG_PB	Sf._2220	1			Seifhennersdorf	Lower Oligocene	Betulaceae	Betula	Betula_alboides	deciduous	tree	unlobed	dentate	pinnate	non-looped	F	F	F	no	no	no	no	no	no	no
SNSD, MMG_PB	Sf._2224	1	1		Seifhennersdorf	Lower Oligocene	Betulaceae	Betula	Betula_alboides	deciduous	tree	unlobed	dentate	pinnate	non-looped	F	F	F	no	no	no	no	no	no	no
SNSD, MMG_PB	Sf._2229	1			Seifhennersdorf	Lower Oligocene	Betulaceae	Betula	Betula_alboides	deciduous	tree	unlobed	dentate	pinnate	non-looped	F	F	F	no	no	no	no	no	no	no
SNSD, MMG_PB	Sf._2237	1			Seifhennersdorf	Lower Oligocene	Betulaceae	Betula	Betula_alboides	deciduous	tree	unlobed	dentate	pinnate	non-looped	F	F	F	no	no	no	no	no	no	no
SNSD, MMG_PB	Sf._2366	1	1		Seifhennersdorf	Lower Oligocene	Betulaceae	Betula	Betula_alboides	deciduous	tree	unlobed	dentate	pinnate	non-looped	F	F	F	no	no	no	no	no	no	no
SNSD, MMG_PB	Sf._2421	1	1		Seifhennersdorf	Lower Oligocene	Betulaceae	Betula	Betula_alboides	deciduous	tree	unlobed	dentate	pinnate	non-looped	F	F	F	no	no	no	no	no	no	no
SNSD, MMG_PB	Sf._3066	1			Seifhennersdorf	Lower Oligocene	Betulaceae	Betula	Betula_alboides	deciduous	tree	unlobed	dentate	pinnate	non-looped	F	F	F	no	no	no	no	no	no	no
SNSD, MMG_PB	Sf._3293a	1	1		Seifhennersdorf	Lower Oligocene	Betulaceae	Betula	Betula_alboides	deciduous	tree	unlobed	dentate	pinnate	non-looped	F	F	F	no	no	no	no	no	no	no
SNSD, MMG_PB	Sf._3293b	1	1		Seifhennersdorf	Lower Oligocene	Betulaceae	Betula	Betula_alboides	deciduous	tree	unlobed	dentate	pinnate	non-looped	F	F	F	no	no	no	no	no	no	no
SNSD, MMG_PB	Sf._3315,1	1			Seifhennersdorf	Lower Oligocene	Betulaceae	Betula	Betula_alboides	deciduous	tree	unlobed	dentate	pinnate	non-looped	F	F	F	no	no	no	no	no	no	no
SNSD, MMG_PB	Sf._3316a	1			Seifhennersdorf	Lower Oligocene	Betulaceae	Betula	Betula_alboides	deciduous	tree	unlobed	dentate	pinnate	non-looped	F	F	F	no	no	no	no	no	no	no
SNSD, MMG_PB	Sf._3316b	1			Seifhennersdorf	Lower Oligocene	Betulaceae	Betula	Betula_alboides	deciduous	tree	unlobed	dentate	pinnate	non-looped	F	F	F	no	no	no	no	no	no	no
SNSD, MMG_PB	Sf._3433:1,2	1			Seifhennersdorf	Lower Oligocene	Betulaceae	Betula	Betula_alboides	deciduous	tree	unlobed	dentate	pinnate	non-looped	F	F	F	no	no	no	no	no	no	no
SNSD, MMG_PB	Sf._3458	1	1		Seifhennersdorf	Lower Oligocene	Betulaceae	Betula	Betula_alboides	deciduous	tree	unlobed	dentate	pinnate	non-looped	F	F	F	no	no	no	no	no	no	no
SNSD, MMG_PB	Sf._3730	1	1	1	Seifhennersdorf	Lower Oligocene	Betulaceae	Betula	Betula_alboides	deciduous	tree	unlobed	dentate	pinnate	non-looped	F	F	F	no	no	no	no	no	no	no
SNSD, MMG_PB	Sf._4095	1	1		Seifhennersdorf	Lower Oligocene	Betulaceae	Betula	Betula_alboides	deciduous	tree	unlobed	dentate	pinnate	non-looped	F	F	F	no	no	no	no	no	no	no
SNSD, MMG_PB	Sf._4205	1			Seifhennersdorf	Lower Oligocene	Betulaceae	Betula	Betula_alboides	deciduous	tree	unlobed	dentate	pinnate	non-looped	F	F	F	no	no	no	no	no	no	no
SNSD, MMG_PB	Sf._4253:1,2	1	1		Seifhennersdorf	Lower Oligocene	Betulaceae	Betula	Betula_alboides	deciduous	tree	unlobed	dentate	pinnate	non-looped	F	F	F	no	no	no	no	no	no	no
SNSD, MMG_PB	Sf._4255a	1			Seifhennersdorf	Lower Oligocene	Betulaceae	Betula	Betula_alboides	deciduous	tree	unlobed	dentate	pinnate	non-looped	F	F	F	no	no	no	no	no	no	no
SNSD, MMG_PB	Sf._4304b	1			Seifhennersdorf	Lower Oligocene	Betulaceae	Betula	Betula_alboides	deciduous	tree	unlobed	dentate	pinnate	non-looped	F	F	F	no	no	no	no	no	no	no
SNSD, MMG_PB	Sf._4360	1	1		Seifhennersdorf	Lower Oligocene	Betulaceae	Betula	Betula_alboides	deciduous	tree	unlobed	dentate	pinnate	non-looped	F	F	F	no	no	no	no	no	no	no
SNSD, MMG_PB	Sf._4361	1	1	1	Seifhennersdorf	Lower Oligocene	Betulaceae	Betula	Betula_alboides	deciduous	tree	unlobed	dentate	pinnate	non-looped	F	F	F	yes	yes	no	no	no	no	no	2
SNSD, MMG_PB	Sf._4681	1			Seifhennersdorf	Lower Oligocene	Betulaceae	Betula	Betula_alboides	deciduous	tree	unlobed	dentate	pinnate	non-looped	F	F	F	no	no	no	no	no	no	no
SNSD, MMG_PB	Sf._4689	1			Seifhennersdorf	Lower Oligocene	Betulaceae	Betula	Betula_alboides	deciduous	tree	unlobed	dentate	pinnate	non-looped	F	F	F	no	no	no	no	no	no	no
SNSD, MMG_PB	Sf._4692	1	1		Seifhennersdorf	Lower Oligocene	Betulaceae	Betula	Betula_alboides	deciduous	tree	unlobed	dentate	pinnate	non-looped	F	F	F	no	no	no	no	no	no	no
SNSD, MMG_PB	Sf._4701:1,2	1	1		Seifhennersdorf	Lower Oligocene	Betulaceae	Betula	Betula_alboides	deciduous	tree	unlobed	dentate	pinnate	non-looped	F	F	F	no	no	no	no	no	no	no
SNSD, MMG_PB	Sf._4705	1	1		Seifhennersdorf	Lower Oligocene	Betulaceae	Betula	Betula_alboides	deciduous	tree	unlobed	dentate	pinnate	non-looped	F	F	F	no	no	no	no	no	no	no
SNSD, MMG_PB	Sf._4717	1			Seifhennersdorf	Lower Oligocene	Betulaceae	Betula	Betula_alboides	deciduous	tree	unlobed	dentate	pinnate	non-looped	F	F	F	yes	yes	no	no	no	no	no	2
SNSD, MMG_PB	Sf._4718a	1	1	1	Seifhennersdorf	Lower Oligocene	Betulaceae	Betula	Betula_alboides	deciduous	tree	unlobed	dentate	pinnate	non-looped	F	F	F	no	no	no	no	no	no	no
SNSD, MMG_PB	Sf._4719	1	1	1	Seifhennersdorf	Lower Oligocene	Betulaceae	Betula	Betula_alboides	deciduous	tree	unlobed	dentate	pinnate	non-looped	F	F	F	no	no	no	no	no	no	no
SNSD, MMG_PB	Sf._4722	1			Seifhennersdorf	Lower Oligocene	Betulaceae	Betula	Betula_alboides	deciduous	tree	unlobed	dentate	pinnate	non-looped	F	F	F	no	no	no	no	no	no	no
SNSD, MMG_PB	Sf._4724	1	1	1	Seifhennersdorf	Lower Oligocene	Betulaceae	Betula	Betula_alboides	deciduous	tree	unlobed	dentate	pinnate	non-looped	F	F	F	no	no	no	no	no	no	no
SNSD, MMG_PB	Sf._4725	1			Seifhennersdorf	Lower Oligocene	Betulaceae	Betula	Betula_alboides	deciduous	tree	unlobed	dentate	pinnate	non-looped	F	F	F	no	no	no	no	no	no	no
SNSD, MMG_PB	Sf._4726	1	1		Seifhennersdorf	Lower Oligocene	Betulaceae	Betula	Betula_alboides	deciduous	tree	unlobed	dentate	pinnate	non-looped	F	F	F	no	no	no	no	no	no	no
SNSD, MMG_PB	Sf._4727:1,2	1			Seifhennersdorf	Lower Oligocene	Betulaceae	Betula	Betula_alboides	deciduous	tree	unlobed	dentate	pinnate	non-looped	F	F	F	no	no	no	no	no	no	no
SNSD, MMG_PB	Sf._4734	1	1		Seifhennersdorf	Lower Oligocene	Betulaceae	Betula	Betula_alboides	deciduous	tree	unlobed	dentate	pinnate	non-looped	F	F	F	yes	yes	no	no	no	no	no	2	57
SNSD, MMG_PB	Sf._4736:1,2	1	1	1	Seifhennersdorf	Lower Oligocene	Betulaceae	Betula	Betula_alboides	deciduous	tree	unlobed	dentate	pinnate	non-looped	F	F	F	no	no	no	no	no	no	no
SNSD, MMG_PB	Sf._4877a	1			Seifhennersdorf	Lower Oligocene	Betulaceae	Betula	Betula_alboides	deciduous	tree	unlobed	dentate	pinnate	non-looped	F	F	F	yes	no	yes	no	no	no	no	14
SNSD, MMG_PB	Sf._4877b	1			Seifhennersdorf	Lower Oligocene	Betulaceae	Betula	Betula_alboides	deciduous	tree	unlobed	dentate	pinnate	non-looped	F	F	F	no	no	no	no	no	no	no
SNSD, MMG_PB	Sf._4931 (II)	1	1		Seifhennersdorf	Lower Oligocene	Betulaceae	Betula	Betula_alboides	deciduous	tree	unlobed	dentate	pinnate	non-looped	F	F	F	no	no	no	no	no	no	no
SNSD, MMG_PB	Sf._4718a	1	1		Seifhennersdorf	Lower Oligocene	Betulaceae	Betula	Betula_alboides	deciduous	tree	unlobed	dentate	pinnate	non-looped	F	F	F	no	no	no	no	no	no	no
SNSD, MMG_PB	Sf._5238	1	1	1	Seifhennersdorf	Lower Oligocene	Betulaceae	Betula	Betula_alboides	deciduous	tree	unlobed	dentate	pinnate	non-looped	F	F	F	no	no	no	no	no	no	no
SNSD, MMG_PB	Sf._7554	1	1		Seifhennersdorf	Lower Oligocene	Betulaceae	Betula	Betula_alboides	deciduous	tree	unlobed	dentate	pinnate	non-looped	F	F	F	no	no	no	no	no	no	no
SNSD, MMG_PB	Sf._7889	1	1		Seifhennersdorf	Lower Oligocene	Betulaceae	Betula	Betula_alboides	deciduous	tree	unlobed	dentate	pinnate	non-looped	F	F	F	no	no	no	no	no	no	no
SNSD, MMG_PB	Sf._8263	1	1		Seifhennersdorf	Lower Oligocene	Betulaceae	Betula	Betula_alboides	deciduous	tree	unlobed	dentate	pinnate	non-looped	F	F	F	no	no	no	no	no	no	no
SNSD, MMG_PB	Sf._8264a	1	1		Seifhennersdorf	Lower Oligocene	Betulaceae	Betula	Betula_alboides	deciduous	tree	unlobed	dentate	pinnate	non-looped	F	F	F	yes	yes	no	no	no	no	no	2
SNSD, MMG_PB	Sf._8270:1b	1			Seifhennersdorf	Lower Oligocene	Betulaceae	Betula	Betula_alboides	deciduous	tree	unlobed	dentate	pinnate	non-looped	F	F	F	no	no	no	no	no	no	no
SNSD, MMG_PB	Sf._8312	1			Seifhennersdorf	Lower Oligocene	Betulaceae	Betula	Betula_alboides	deciduous	tree	unlobed	dentate	pinnate	non-looped	F	F	F	no	no	no	no	no	no	no
SNSD, MMG_PB	Sf._8654	1			Seifhennersdorf	Lower Oligocene	Betulaceae	Betula	Betula_alboides	deciduous	tree	unlobed	dentate	pinnate	non-looped	F	F	F	no	no	no	no	no	no	no
SNSD, MMG_PB	Sf._8680	1			Seifhennersdorf	Lower Oligocene	Betulaceae	Betula	Betula_alboides	deciduous	tree	unlobed	dentate	pinnate	non-looped	F	F	F	no	no	no	no	no	no	no
SNSD, MMG_PB	Sf._35 (II)	1	1	1	Seifhennersdorf	Lower Oligocene	Betulaceae	Carpinus	Carpinus_grandis	deciduous	tree	unlobed	dentate	pinnate	non-looped	F	F	F	no	no	no	no	no	no	no
SNSD, MMG_PB	Sf._365:1,2	1	1		Seifhennersdorf	Lower Oligocene	Betulaceae	Carpinus	Carpinus_grandis	deciduous	tree	unlobed	dentate	pinnate	non-looped	F	F	F	no	no	no	no	no	no	no
SNSD, MMG_PB	Sf._1196	1	1		Seifhennersdorf	Lower Oligocene	Betulaceae	Carpinus	Carpinus_grandis	deciduous	tree	unlobed	dentate	pinnate	non-looped	F	F	F	no	no	no	no	no	no	no
SNSD, MMG_PB	Sf._1265	1	1		Seifhennersdorf	Lower Oligocene	Betulaceae	Carpinus	Carpinus_grandis	deciduous	tree	unlobed	dentate	pinnate	non-looped	F	F	F	no	no	no	no	no	no	no
SNSD, MMG_PB	Sf._1284a	1			Seifhennersdorf	Lower Oligocene	Betulaceae	Carpinus	Carpinus_grandis	deciduous	tree	unlobed	dentate	pinnate	non-looped	F	F	F	no	no	no	no	no	no	no
SNSD, MMG_PB	Sf._1301	1			Seifhennersdorf	Lower Oligocene	Betulaceae	Carpinus	Carpinus_grandis	deciduous	tree	unlobed	dentate	pinnate	non-looped	F	F	F	no	no	no	no	no	no	no
SNSD, MMG_PB	Sf._1305:1,2	1			Seifhennersdorf	Lower Oligocene	Betulaceae	Carpinus	Carpinus_grandis	deciduous	tree	unlobed	dentate	pinnate	non-looped	F	F	F	yes	yes	no	no	no	no	no	78
SNSD, MMG_PB	Sf._1349a	1	1		Seifhennersdorf	Lower Oligocene	Betulaceae	Carpinus	Carpinus_grandis	deciduous	tree	unlobed	dentate	pinnate	non-looped	F	F	F	no	no	no	no	no	no	no
SNSD, MMG_PB	Sf._1361	1			Seifhennersdorf	Lower Oligocene	Betulaceae	Carpinus	Carpinus_grandis	deciduous	tree	unlobed	dentate	pinnate	non-looped	F	F	F	no	no	no	no	no	no	no
SNSD, MMG_PB	Sf._1362	1	1		Seifhennersdorf	Lower Oligocene	Betulaceae	Carpinus	Carpinus_grandis	deciduous	tree	unlobed	dentate	pinnate	non-looped	F	F	F	no	no	no	no	no	no	no
SNSD, MMG_PB	Sf._1366:1,2	1			Seifhennersdorf	Lower Oligocene	Betulaceae	Carpinus	Carpinus_grandis	deciduous	tree	unlobed	dentate	pinnate	non-looped	F	F	F	no	no	no	no	no	no	no
SNSD, MMG_PB	Sf._1369	1	1		Seifhennersdorf	Lower Oligocene	Betulaceae	Carpinus	Carpinus_grandis	deciduous	tree	unlobed	dentate	pinnate	non-looped	F	F	F	no	no	no	no	no	no	no
SNSD, MMG_PB	Sf._1370	1			Seifhennersdorf	Lower Oligocene	Betulaceae	Carpinus	Carpinus_grandis	deciduous	tree	unlobed	dentate	pinnate	non-looped	F	F	F	no	no	no	no	no	no	no
SNSD, MMG_PB	Sf._1376	1			Seifhennersdorf	Lower Oligocene	Betulaceae	Carpinus	Carpinus_grandis	deciduous	tree	unlobed	dentate	pinnate	non-looped	F	F	F	no	no	no	no	no	no	no
SNSD, MMG_PB	Sf._1380:1,2	1			Seifhennersdorf	Lower Oligocene	Betulaceae	Carpinus	Carpinus_grandis	deciduous	tree	unlobed	dentate	pinnate	non-looped	F	F	F	no	no	no	no	no	no	no
SNSD, MMG_PB	Sf._1382	1			Seifhennersdorf	Lower Oligocene	Betulaceae	Carpinus	Carpinus_grandis	deciduous	tree	unlobed	dentate	pinnate	non-looped	F	F	F	no	no	no	no	no	no	no
SNSD, MMG_PB	Sf._1383	1			Seifhennersdorf	Lower Oligocene	Betulaceae	Carpinus	Carpinus_grandis	deciduous	tree	unlobed	dentate	pinnate	non-looped	F	F	F	no	no	no	no	no	no	no
SNSD, MMG_PB	Sf._1384	1			Seifhennersdorf	Lower Oligocene	Betulaceae	Carpinus	Carpinus_grandis	deciduous	tree	unlobed	dentate	pinnate	non-looped	F	F	F	no	no	no	no	no	no	no
SNSD, MMG_PB	Sf._1385	1			Seifhennersdorf	Lower Oligocene	Betulaceae	Carpinus	Carpinus_grandis	deciduous	tree	unlobed	dentate	pinnate	non-looped	F	F	F	no	no	no	no	no	no	no
SNSD, MMG_PB	Sf._1445	1			Seifhennersdorf	Lower Oligocene	Betulaceae	Carpinus	Carpinus_grandis	deciduous	tree	unlobed	dentate	pinnate	non-looped	F	F	F	no	no	no	no	no	no	no
SNSD, MMG_PB	Sf._1455	1	1	1	Seifhennersdorf	Lower Oligocene	Betulaceae	Carpinus	Carpinus_grandis	deciduous	tree	unlobed	dentate	pinnate	non-looped	F	F	F	no	no	no	no	no	no	no
SNSD, MMG_PB	Sf._1495	1			Seifhennersdorf	Lower Oligocene	Betulaceae	Carpinus	Carpinus_grandis	deciduous	tree	unlobed	dentate	pinnate	non-looped	F	F	F	no	no	no	no	no	no	no
SNSD, MMG_PB	Sf._1497	1			Seifhennersdorf	Lower Oligocene	Betulaceae	Carpinus	Carpinus_grandis	deciduous	tree	unlobed	dentate	pinnate	non-looped	F	F	F	no	no	no	no	no	no	no
SNSD, MMG_PB	Sf._1499	1			Seifhennersdorf	Lower Oligocene	Betulaceae	Carpinus	Carpinus_grandis	deciduous	tree	unlobed	dentate	pinnate	non-looped	F	F	F	no	no	no	no	no	no	no
SNSD, MMG_PB	Sf._1537	1			Seifhennersdorf	Lower Oligocene	Betulaceae	Carpinus	Carpinus_grandis	deciduous	tree	unlobed	dentate	pinnate	non-looped	F	F	F	no	no	no	no	no	no	no
SNSD, MMG_PB	Sf._1539	1			Seifhennersdorf	Lower Oligocene	Betulaceae	Carpinus	Carpinus_grandis	deciduous	tree	unlobed	dentate	pinnate	non-looped	F	F	F	no	no	no	no	no	no	no
SNSD, MMG_PB	Sf._1541	1	1		Seifhennersdorf	Lower Oligocene	Betulaceae	Carpinus	Carpinus_grandis	deciduous	tree	unlobed	dentate	pinnate	non-looped	F	F	F	no	no	no	no	no	no	no
SNSD, MMG_PB	Sf._1544	1			Seifhennersdorf	Lower Oligocene	Betulaceae	Carpinus	Carpinus_grandis	deciduous	tree	unlobed	dentate	pinnate	non-looped	F	F	F	no	no	no	no	no	no	no
SNSD, MMG_PB	Sf._1545	1	1		Seifhennersdorf	Lower Oligocene	Betulaceae	Carpinus	Carpinus_grandis	deciduous	tree	unlobed	dentate	pinnate	non-looped	F	F	F	no	no	no	no	no	no	no
SNSD, MMG_PB	Sf._1547	1			Seifhennersdorf	Lower Oligocene	Betulaceae	Carpinus	Carpinus_grandis	deciduous	tree	unlobed	dentate	pinnate	non-looped	F	F	F	no	no	no	no	no	no	no
SNSD, MMG_PB	Sf._1549	1			Seifhennersdorf	Lower Oligocene	Betulaceae	Carpinus	Carpinus_grandis	deciduous	tree	unlobed	dentate	pinnate	non-looped	F	F	F	no	no	no	no	no	no	no
SNSD, MMG_PB	Sf._1550	1	1		Seifhennersdorf	Lower Oligocene	Betulaceae	Carpinus	Carpinus_grandis	deciduous	tree	unlobed	dentate	pinnate	non-looped	F	F	F	no	no	no	no	no	no	no
SNSD, MMG_PB	Sf._1553	1	1		Seifhennersdorf	Lower Oligocene	Betulaceae	Carpinus	Carpinus_grandis	deciduous	tree	unlobed	dentate	pinnate	non-looped	F	F	F	no	no	no	no	no	no	no
SNSD, MMG_PB	Sf._1555	1	1		Seifhennersdorf	Lower Oligocene	Betulaceae	Carpinus	Carpinus_grandis	deciduous	tree	unlobed	dentate	pinnate	non-looped	F	F	F	no	no	no	no	no	no	no
SNSD, MMG_PB	Sf._1556	1			Seifhennersdorf	Lower Oligocene	Betulaceae	Carpinus	Carpinus_grandis	deciduous	tree	unlobed	dentate	pinnate	non-looped	F	F	F	no	no	no	no	no	no	no
SNSD, MMG_PB	Sf._1557	1	1		Seifhennersdorf	Lower Oligocene	Betulaceae	Carpinus	Carpinus_grandis	deciduous	tree	unlobed	dentate	pinnate	non-looped	F	F	F	no	no	no	no	no	no	no
SNSD, MMG_PB	Sf._1558	1			Seifhennersdorf	Lower Oligocene	Betulaceae	Carpinus	Carpinus_grandis	deciduous	tree	unlobed	dentate	pinnate	non-looped	F	F	F	no	no	no	no	no	no	no
SNSD, MMG_PB	Sf._1559	1	1		Seifhennersdorf	Lower Oligocene	Betulaceae	Carpinus	Carpinus_grandis	deciduous	tree	unlobed	dentate	pinnate	non-looped	F	F	F	no	no	no	no	no	no	no
SNSD, MMG_PB	Sf._1560	1			Seifhennersdorf	Lower Oligocene	Betulaceae	Carpinus	Carpinus_grandis	deciduous	tree	unlobed	dentate	pinnate	non-looped	F	F	F	no	no	no	no	no	no	no
SNSD, MMG_PB	Sf._1562	1	1		Seifhennersdorf	Lower Oligocene	Betulaceae	Carpinus	Carpinus_grandis	deciduous	tree	unlobed	dentate	pinnate	non-looped	F	F	F	no	no	no	no	no	no	no
SNSD, MMG_PB	Sf._1564	1	1		Seifhennersdorf	Lower Oligocene	Betulaceae	Carpinus	Carpinus_grandis	deciduous	tree	unlobed	dentate	pinnate	non-looped	F	F	F	no	no	no	no	no	no	no
SNSD, MMG_PB	Sf._1565	1			Seifhennersdorf	Lower Oligocene	Betulaceae	Carpinus	Carpinus_grandis	deciduous	tree	unlobed	dentate	pinnate	non-looped	F	F	F	no	no	no	no	no	no	no
SNSD, MMG_PB	Sf._1566	1	1		Seifhennersdorf	Lower Oligocene	Betulaceae	Carpinus	Carpinus_grandis	deciduous	tree	unlobed	dentate	pinnate	non-looped	F	F	F	no	no	no	no	no	no	no
SNSD, MMG_PB	Sf._1567	1			Seifhennersdorf	Lower Oligocene	Betulaceae	Carpinus	Carpinus_grandis	deciduous	tree	unlobed	dentate	pinnate	non-looped	F	F	F	no	no	no	no	no	no	no
SNSD, MMG_PB	Sf._1568	1			Seifhennersdorf	Lower Oligocene	Betulaceae	Carpinus	Carpinus_grandis	deciduous	tree	unlobed	dentate	pinnate	non-looped	F	F	F	no	no	no	no	no	no	no
SNSD, MMG_PB	Sf._1569	1			Seifhennersdorf	Lower Oligocene	Betulaceae	Carpinus	Carpinus_grandis	deciduous	tree	unlobed	dentate	pinnate	non-looped	F	F	F	no	no	no	no	no	no	no
SNSD, MMG_PB	Sf._1570	1			Seifhennersdorf	Lower Oligocene	Betulaceae	Carpinus	Carpinus_grandis	deciduous	tree	unlobed	dentate	pinnate	non-looped	F	F	F	yes	yes	no	no	no	no	no	78
SNSD, MMG_PB	Sf._1571	1	1	1	Seifhennersdorf	Lower Oligocene	Betulaceae	Carpinus	Carpinus_grandis	deciduous	tree	unlobed	dentate	pinnate	non-looped	F	F	F	no	no	no	no	no	no	no
SNSD, MMG_PB	Sf._1572:1,2	1	1		Seifhennersdorf	Lower Oligocene	Betulaceae	Carpinus	Carpinus_grandis	deciduous	tree	unlobed	dentate	pinnate	non-looped	F	F	F	no	no	no	no	no	no	no
SNSD, MMG_PB	Sf._1573a	1	1		Seifhennersdorf	Lower Oligocene	Betulaceae	Carpinus	Carpinus_grandis	deciduous	tree	unlobed	dentate	pinnate	non-looped	F	F	F	no	no	no	no	no	no	no
SNSD, MMG_PB	Sf._1573b	1			Seifhennersdorf	Lower Oligocene	Betulaceae	Carpinus	Carpinus_grandis	deciduous	tree	unlobed	dentate	pinnate	non-looped	F	F	F	no	no	no	no	no	no	no
SNSD, MMG_PB	Sf._1575	1	1	1	Seifhennersdorf	Lower Oligocene	Betulaceae	Carpinus	Carpinus_grandis	deciduous	tree	unlobed	dentate	pinnate	non-looped	F	F	F	no	no	no	no	no	no	no
SNSD, MMG_PB	Sf._1576	1			Seifhennersdorf	Lower Oligocene	Betulaceae	Carpinus	Carpinus_grandis	deciduous	tree	unlobed	dentate	pinnate	non-looped	F	F	F	no	no	no	no	no	no	no
SNSD, MMG_PB	Sf._1577	1			Seifhennersdorf	Lower Oligocene	Betulaceae	Carpinus	Carpinus_grandis	deciduous	tree	unlobed	dentate	pinnate	non-looped	F	F	F	no	no	no	no	no	no	no
SNSD, MMG_PB	Sf._1578	1			Seifhennersdorf	Lower Oligocene	Betulaceae	Carpinus	Carpinus_grandis	deciduous	tree	unlobed	dentate	pinnate	non-looped	F	F	F	no	no	no	no	no	no	no
SNSD, MMG_PB	Sf._1579	1			Seifhennersdorf	Lower Oligocene	Betulaceae	Carpinus	Carpinus_grandis	deciduous	tree	unlobed	dentate	pinnate	non-looped	F	F	F	no	no	no	no	no	no	no
SNSD, MMG_PB	Sf._1580	1			Seifhennersdorf	Lower Oligocene	Betulaceae	Carpinus	Carpinus_grandis	deciduous	tree	unlobed	dentate	pinnate	non-looped	F	F	F	no	no	no	no	no	no	no
SNSD, MMG_PB	Sf._1581a	1			Seifhennersdorf	Lower Oligocene	Betulaceae	Carpinus	Carpinus_grandis	deciduous	tree	unlobed	dentate	pinnate	non-looped	F	F	F	no	no	no	no	no	no	no
SNSD, MMG_PB	Sf._1581b	1			Seifhennersdorf	Lower Oligocene	Betulaceae	Carpinus	Carpinus_grandis	deciduous	tree	unlobed	dentate	pinnate	non-looped	F	F	F	no	no	no	no	no	no	no
SNSD, MMG_PB	Sf._1582:1,2 (I)	1			Seifhennersdorf	Lower Oligocene	Betulaceae	Carpinus	Carpinus_grandis	deciduous	tree	unlobed	dentate	pinnate	non-looped	F	F	F	no	no	no	no	no	no	no
SNSD, MMG_PB	Sf._1583	1			Seifhennersdorf	Lower Oligocene	Betulaceae	Carpinus	Carpinus_grandis	deciduous	tree	unlobed	dentate	pinnate	non-looped	F	F	F	no	no	no	no	no	no	no
SNSD, MMG_PB	Sf._1584	1			Seifhennersdorf	Lower Oligocene	Betulaceae	Carpinus	Carpinus_grandis	deciduous	tree	unlobed	dentate	pinnate	non-looped	F	F	F	no	no	no	no	no	no	no
SNSD, MMG_PB	Sf._1586 (I)	1			Seifhennersdorf	Lower Oligocene	Betulaceae	Carpinus	Carpinus_grandis	deciduous	tree	unlobed	dentate	pinnate	non-looped	F	F	F	yes	yes	no	no	no	no	no	78
SNSD, MMG_PB	Sf._1587	1			Seifhennersdorf	Lower Oligocene	Betulaceae	Carpinus	Carpinus_grandis	deciduous	tree	unlobed	dentate	pinnate	non-looped	F	F	F	no	no	no	no	no	no	no
SNSD, MMG_PB	Sf._1588	1			Seifhennersdorf	Lower Oligocene	Betulaceae	Carpinus	Carpinus_grandis	deciduous	tree	unlobed	dentate	pinnate	non-looped	F	F	F	no	no	no	no	no	no	no
SNSD, MMG_PB	Sf._1589	1			Seifhennersdorf	Lower Oligocene	Betulaceae	Carpinus	Carpinus_grandis	deciduous	tree	unlobed	dentate	pinnate	non-looped	F	F	F	no	no	no	no	no	no	no
SNSD, MMG_PB	Sf._1590	1	1		Seifhennersdorf	Lower Oligocene	Betulaceae	Carpinus	Carpinus_grandis	deciduous	tree	unlobed	dentate	pinnate	non-looped	F	F	F	no	no	no	no	no	no	no
SNSD, MMG_PB	Sf._1591	1	1		Seifhennersdorf	Lower Oligocene	Betulaceae	Carpinus	Carpinus_grandis	deciduous	tree	unlobed	dentate	pinnate	non-looped	F	F	F	no	no	no	no	no	no	no
SNSD, MMG_PB	Sf._1592	1	1		Seifhennersdorf	Lower Oligocene	Betulaceae	Carpinus	Carpinus_grandis	deciduous	tree	unlobed	dentate	pinnate	non-looped	F	F	F	no	no	no	no	no	no	no
SNSD, MMG_PB	Sf._1594	1			Seifhennersdorf	Lower Oligocene	Betulaceae	Carpinus	Carpinus_grandis	deciduous	tree	unlobed	dentate	pinnate	non-looped	F	F	F	yes	yes	no	no	no	no	no	2	57
SNSD, MMG_PB	Sf._1595	1			Seifhennersdorf	Lower Oligocene	Betulaceae	Carpinus	Carpinus_grandis	deciduous	tree	unlobed	dentate	pinnate	non-looped	F	F	F	no	no	no	no	no	no	no
SNSD, MMG_PB	Sf._1596	1			Seifhennersdorf	Lower Oligocene	Betulaceae	Carpinus	Carpinus_grandis	deciduous	tree	unlobed	dentate	pinnate	non-looped	F	F	F	no	no	no	no	no	no	no
SNSD, MMG_PB	Sf._1598	1			Seifhennersdorf	Lower Oligocene	Betulaceae	Carpinus	Carpinus_grandis	deciduous	tree	unlobed	dentate	pinnate	non-looped	F	F	F	no	no	no	no	no	no	no
SNSD, MMG_PB	Sf._1599	1	1		Seifhennersdorf	Lower Oligocene	Betulaceae	Carpinus	Carpinus_grandis	deciduous	tree	unlobed	dentate	pinnate	non-looped	F	F	F	no	no	no	no	no	no	no
SNSD, MMG_PB	Sf._1600	1	1		Seifhennersdorf	Lower Oligocene	Betulaceae	Carpinus	Carpinus_grandis	deciduous	tree	unlobed	dentate	pinnate	non-looped	F	F	F	no	no	no	no	no	no	no
SNSD, MMG_PB	Sf._1601	1			Seifhennersdorf	Lower Oligocene	Betulaceae	Carpinus	Carpinus_grandis	deciduous	tree	unlobed	dentate	pinnate	non-looped	F	F	F	yes	yes	no	no	no	no	no	2
SNSD, MMG_PB	Sf._1603:1,2	1			Seifhennersdorf	Lower Oligocene	Betulaceae	Carpinus	Carpinus_grandis	deciduous	tree	unlobed	dentate	pinnate	non-looped	F	F	F	no	no	no	no	no	no	no
SNSD, MMG_PB	Sf._1604	1	1		Seifhennersdorf	Lower Oligocene	Betulaceae	Carpinus	Carpinus_grandis	deciduous	tree	unlobed	dentate	pinnate	non-looped	F	F	F	no	no	no	no	no	no	no
SNSD, MMG_PB	Sf._1605	1			Seifhennersdorf	Lower Oligocene	Betulaceae	Carpinus	Carpinus_grandis	deciduous	tree	unlobed	dentate	pinnate	non-looped	F	F	F	no	no	no	no	no	no	no
SNSD, MMG_PB	Sf._1606	1			Seifhennersdorf	Lower Oligocene	Betulaceae	Carpinus	Carpinus_grandis	deciduous	tree	unlobed	dentate	pinnate	non-looped	F	F	F	no	no	no	no	no	no	no
SNSD, MMG_PB	Sf._1607	1	1		Seifhennersdorf	Lower Oligocene	Betulaceae	Carpinus	Carpinus_grandis	deciduous	tree	unlobed	dentate	pinnate	non-looped	F	F	F	no	no	no	no	no	no	no
SNSD, MMG_PB	Sf._1608	1			Seifhennersdorf	Lower Oligocene	Betulaceae	Carpinus	Carpinus_grandis	deciduous	tree	unlobed	dentate	pinnate	non-looped	F	F	F	no	no	no	no	no	no	no
SNSD, MMG_PB	Sf._1609 (I)	1	1		Seifhennersdorf	Lower Oligocene	Betulaceae	Carpinus	Carpinus_grandis	deciduous	tree	unlobed	dentate	pinnate	non-looped	F	F	F	no	no	no	no	no	no	no
SNSD, MMG_PB	Sf._1610	1			Seifhennersdorf	Lower Oligocene	Betulaceae	Carpinus	Carpinus_grandis	deciduous	tree	unlobed	dentate	pinnate	non-looped	F	F	F	yes	no	yes	no	no	no	no	26
SNSD, MMG_PB	Sf._1611	1	1		Seifhennersdorf	Lower Oligocene	Betulaceae	Carpinus	Carpinus_grandis	deciduous	tree	unlobed	dentate	pinnate	non-looped	F	F	F	no	no	no	no	no	no	no
SNSD, MMG_PB	Sf._1612	1	1		Seifhennersdorf	Lower Oligocene	Betulaceae	Carpinus	Carpinus_grandis	deciduous	tree	unlobed	dentate	pinnate	non-looped	F	F	F	no	no	no	no	no	no	no
SNSD, MMG_PB	Sf._1613 (I)	1	1		Seifhennersdorf	Lower Oligocene	Betulaceae	Carpinus	Carpinus_grandis	deciduous	tree	unlobed	dentate	pinnate	non-looped	F	F	F	no	no	no	no	no	no	no
SNSD, MMG_PB	Sf._1616 (I)	1			Seifhennersdorf	Lower Oligocene	Betulaceae	Carpinus	Carpinus_grandis	deciduous	tree	unlobed	dentate	pinnate	non-looped	F	F	F	no	no	no	no	no	no	no
SNSD, MMG_PB	Sf._1617	1			Seifhennersdorf	Lower Oligocene	Betulaceae	Carpinus	Carpinus_grandis	deciduous	tree	unlobed	dentate	pinnate	non-looped	F	F	F	no	no	no	no	no	no	no
SNSD, MMG_PB	Sf._1618	1			Seifhennersdorf	Lower Oligocene	Betulaceae	Carpinus	Carpinus_grandis	deciduous	tree	unlobed	dentate	pinnate	non-looped	F	F	F	no	no	no	no	no	no	no
SNSD, MMG_PB	Sf._1619 (I)	1			Seifhennersdorf	Lower Oligocene	Betulaceae	Carpinus	Carpinus_grandis	deciduous	tree	unlobed	dentate	pinnate	non-looped	F	F	F	no	no	no	no	no	no	no
SNSD, MMG_PB	Sf._1620	1			Seifhennersdorf	Lower Oligocene	Betulaceae	Carpinus	Carpinus_grandis	deciduous	tree	unlobed	dentate	pinnate	non-looped	F	F	F	no	no	no	no	no	no	no
SNSD, MMG_PB	Sf._1621	1			Seifhennersdorf	Lower Oligocene	Betulaceae	Carpinus	Carpinus_grandis	deciduous	tree	unlobed	dentate	pinnate	non-looped	F	F	F	no	no	no	no	no	no	no
SNSD, MMG_PB	Sf._1622	1			Seifhennersdorf	Lower Oligocene	Betulaceae	Carpinus	Carpinus_grandis	deciduous	tree	unlobed	dentate	pinnate	non-looped	F	F	F	no	no	no	no	no	no	no
SNSD, MMG_PB	Sf._1623	1			Seifhennersdorf	Lower Oligocene	Betulaceae	Carpinus	Carpinus_grandis	deciduous	tree	unlobed	dentate	pinnate	non-looped	F	F	F	no	no	no	no	no	no	no
SNSD, MMG_PB	Sf._1624	1	1		Seifhennersdorf	Lower Oligocene	Betulaceae	Carpinus	Carpinus_grandis	deciduous	tree	unlobed	dentate	pinnate	non-looped	F	F	F	no	no	no	no	no	no	no
SNSD, MMG_PB	Sf._1625	1			Seifhennersdorf	Lower Oligocene	Betulaceae	Carpinus	Carpinus_grandis	deciduous	tree	unlobed	dentate	pinnate	non-looped	F	F	F	no	no	no	no	no	no	no
SNSD, MMG_PB	Sf._1626	1			Seifhennersdorf	Lower Oligocene	Betulaceae	Carpinus	Carpinus_grandis	deciduous	tree	unlobed	dentate	pinnate	non-looped	F	F	F	yes	no	yes	no	no	no	no	214
SNSD, MMG_PB	Sf._1627	1			Seifhennersdorf	Lower Oligocene	Betulaceae	Carpinus	Carpinus_grandis	deciduous	tree	unlobed	dentate	pinnate	non-looped	F	F	F	no	no	no	no	no	no	no
SNSD, MMG_PB	Sf._1628	1			Seifhennersdorf	Lower Oligocene	Betulaceae	Carpinus	Carpinus_grandis	deciduous	tree	unlobed	dentate	pinnate	non-looped	F	F	F	no	no	no	no	no	no	no
SNSD, MMG_PB	Sf._1629	1	1		Seifhennersdorf	Lower Oligocene	Betulaceae	Carpinus	Carpinus_grandis	deciduous	tree	unlobed	dentate	pinnate	non-looped	F	F	F	no	no	no	no	no	no	no
SNSD, MMG_PB	Sf._1630	1			Seifhennersdorf	Lower Oligocene	Betulaceae	Carpinus	Carpinus_grandis	deciduous	tree	unlobed	dentate	pinnate	non-looped	F	F	F	no	no	no	no	no	no	no
SNSD, MMG_PB	Sf._1631	1	1		Seifhennersdorf	Lower Oligocene	Betulaceae	Carpinus	Carpinus_grandis	deciduous	tree	unlobed	dentate	pinnate	non-looped	F	F	F	no	no	no	no	no	no	no
SNSD, MMG_PB	Sf._1632	1			Seifhennersdorf	Lower Oligocene	Betulaceae	Carpinus	Carpinus_grandis	deciduous	tree	unlobed	dentate	pinnate	non-looped	F	F	F	yes	yes	no	no	no	no	no	2	78
SNSD, MMG_PB	Sf._1633	1	1		Seifhennersdorf	Lower Oligocene	Betulaceae	Carpinus	Carpinus_grandis	deciduous	tree	unlobed	dentate	pinnate	non-looped	F	F	F	no	no	no	no	no	no	no
SNSD, MMG_PB	Sf._1634	1			Seifhennersdorf	Lower Oligocene	Betulaceae	Carpinus	Carpinus_grandis	deciduous	tree	unlobed	dentate	pinnate	non-looped	F	F	F	no	no	no	no	no	no	no
SNSD, MMG_PB	Sf._1635	1	1		Seifhennersdorf	Lower Oligocene	Betulaceae	Carpinus	Carpinus_grandis	deciduous	tree	unlobed	dentate	pinnate	non-looped	F	F	F	no	no	no	no	no	no	no
SNSD, MMG_PB	Sf._1636	1	1		Seifhennersdorf	Lower Oligocene	Betulaceae	Carpinus	Carpinus_grandis	deciduous	tree	unlobed	dentate	pinnate	non-looped	F	F	F	no	no	no	no	no	no	no
SNSD, MMG_PB	Sf._1637	1			Seifhennersdorf	Lower Oligocene	Betulaceae	Carpinus	Carpinus_grandis	deciduous	tree	unlobed	dentate	pinnate	non-looped	F	F	F	no	no	no	no	no	no	no
SNSD, MMG_PB	Sf._1638	1	1		Seifhennersdorf	Lower Oligocene	Betulaceae	Carpinus	Carpinus_grandis	deciduous	tree	unlobed	dentate	pinnate	non-looped	F	F	F	no	no	no	no	no	no	no
SNSD, MMG_PB	Sf._1639	1			Seifhennersdorf	Lower Oligocene	Betulaceae	Carpinus	Carpinus_grandis	deciduous	tree	unlobed	dentate	pinnate	non-looped	F	F	F	no	no	no	no	no	no	no
SNSD, MMG_PB	Sf._1641:1,2	1	1		Seifhennersdorf	Lower Oligocene	Betulaceae	Carpinus	Carpinus_grandis	deciduous	tree	unlobed	dentate	pinnate	non-looped	F	F	F	no	no	no	no	no	no	no
SNSD, MMG_PB	Sf._1642:1,2	1			Seifhennersdorf	Lower Oligocene	Betulaceae	Carpinus	Carpinus_grandis	deciduous	tree	unlobed	dentate	pinnate	non-looped	F	F	F	no	no	no	no	no	no	no
SNSD, MMG_PB	Sf._1643 (I)	1	1		Seifhennersdorf	Lower Oligocene	Betulaceae	Carpinus	Carpinus_grandis	deciduous	tree	unlobed	dentate	pinnate	non-looped	F	F	F	no	no	no	no	no	no	no
SNSD, MMG_PB	Sf._1644	1			Seifhennersdorf	Lower Oligocene	Betulaceae	Carpinus	Carpinus_grandis	deciduous	tree	unlobed	dentate	pinnate	non-looped	F	F	F	no	no	no	no	no	no	no
SNSD, MMG_PB	Sf._1645	1	1	1	Seifhennersdorf	Lower Oligocene	Betulaceae	Carpinus	Carpinus_grandis	deciduous	tree	unlobed	dentate	pinnate	non-looped	F	F	F	no	no	no	no	no	no	no
SNSD, MMG_PB	Sf._1646	1			Seifhennersdorf	Lower Oligocene	Betulaceae	Carpinus	Carpinus_grandis	deciduous	tree	unlobed	dentate	pinnate	non-looped	F	F	F	no	no	no	no	no	no	no
SNSD, MMG_PB	Sf._1649	1			Seifhennersdorf	Lower Oligocene	Betulaceae	Carpinus	Carpinus_grandis	deciduous	tree	unlobed	dentate	pinnate	non-looped	F	F	F	no	no	no	no	no	no	no
SNSD, MMG_PB	Sf._1650	1			Seifhennersdorf	Lower Oligocene	Betulaceae	Carpinus	Carpinus_grandis	deciduous	tree	unlobed	dentate	pinnate	non-looped	F	F	F	no	no	no	no	no	no	no
SNSD, MMG_PB	Sf._1651	1			Seifhennersdorf	Lower Oligocene	Betulaceae	Carpinus	Carpinus_grandis	deciduous	tree	unlobed	dentate	pinnate	non-looped	F	F	F	no	no	no	no	no	no	no
SNSD, MMG_PB	Sf._1652 (I)	1	1		Seifhennersdorf	Lower Oligocene	Betulaceae	Carpinus	Carpinus_grandis	deciduous	tree	unlobed	dentate	pinnate	non-looped	F	F	F	no	no	no	no	no	no	no
SNSD, MMG_PB	Sf._1653	1			Seifhennersdorf	Lower Oligocene	Betulaceae	Carpinus	Carpinus_grandis	deciduous	tree	unlobed	dentate	pinnate	non-looped	F	F	F	no	no	no	no	no	no	no
SNSD, MMG_PB	Sf._1654	1			Seifhennersdorf	Lower Oligocene	Betulaceae	Carpinus	Carpinus_grandis	deciduous	tree	unlobed	dentate	pinnate	non-looped	F	F	F	no	no	no	no	no	no	no
SNSD, MMG_PB	Sf._1655 (I)	1			Seifhennersdorf	Lower Oligocene	Betulaceae	Carpinus	Carpinus_grandis	deciduous	tree	unlobed	dentate	pinnate	non-looped	F	F	F	no	no	no	no	no	no	no
SNSD, MMG_PB	Sf._1656	1	1		Seifhennersdorf	Lower Oligocene	Betulaceae	Carpinus	Carpinus_grandis	deciduous	tree	unlobed	dentate	pinnate	non-looped	F	F	F	no	no	no	no	no	no	no
SNSD, MMG_PB	Sf._1657	1	1		Seifhennersdorf	Lower Oligocene	Betulaceae	Carpinus	Carpinus_grandis	deciduous	tree	unlobed	dentate	pinnate	non-looped	F	F	F	no	no	no	no	no	no	no
SNSD, MMG_PB	Sf._1658	1	1		Seifhennersdorf	Lower Oligocene	Betulaceae	Carpinus	Carpinus_grandis	deciduous	tree	unlobed	dentate	pinnate	non-looped	F	F	F	no	no	no	no	no	no	no
SNSD, MMG_PB	Sf._1659	1	1	1	Seifhennersdorf	Lower Oligocene	Betulaceae	Carpinus	Carpinus_grandis	deciduous	tree	unlobed	dentate	pinnate	non-looped	F	F	F	no	no	no	no	no	no	no
SNSD, MMG_PB	Sf._1660	1			Seifhennersdorf	Lower Oligocene	Betulaceae	Carpinus	Carpinus_grandis	deciduous	tree	unlobed	dentate	pinnate	non-looped	F	F	F	no	no	no	no	no	no	no
SNSD, MMG_PB	Sf._1661	1			Seifhennersdorf	Lower Oligocene	Betulaceae	Carpinus	Carpinus_grandis	deciduous	tree	unlobed	dentate	pinnate	non-looped	F	F	F	no	no	no	no	no	no	no
SNSD, MMG_PB	Sf._1662	1			Seifhennersdorf	Lower Oligocene	Betulaceae	Carpinus	Carpinus_grandis	deciduous	tree	unlobed	dentate	pinnate	non-looped	F	F	F	no	no	no	no	no	no	no
SNSD, MMG_PB	Sf._1664	1			Seifhennersdorf	Lower Oligocene	Betulaceae	Carpinus	Carpinus_grandis	deciduous	tree	unlobed	dentate	pinnate	non-looped	F	F	F	no	no	no	no	no	no	no
SNSD, MMG_PB	Sf._1665	1			Seifhennersdorf	Lower Oligocene	Betulaceae	Carpinus	Carpinus_grandis	deciduous	tree	unlobed	dentate	pinnate	non-looped	F	F	F	no	no	no	no	no	no	no
SNSD, MMG_PB	Sf._1666	1			Seifhennersdorf	Lower Oligocene	Betulaceae	Carpinus	Carpinus_grandis	deciduous	tree	unlobed	dentate	pinnate	non-looped	F	F	F	no	no	no	no	no	no	no
SNSD, MMG_PB	Sf._1667:1,2	1			Seifhennersdorf	Lower Oligocene	Betulaceae	Carpinus	Carpinus_grandis	deciduous	tree	unlobed	dentate	pinnate	non-looped	F	F	F	no	no	no	no	no	no	no
SNSD, MMG_PB	Sf._1668	1	1		Seifhennersdorf	Lower Oligocene	Betulaceae	Carpinus	Carpinus_grandis	deciduous	tree	unlobed	dentate	pinnate	non-looped	F	F	F	no	no	no	no	no	no	no
SNSD, MMG_PB	Sf._1669	1			Seifhennersdorf	Lower Oligocene	Betulaceae	Carpinus	Carpinus_grandis	deciduous	tree	unlobed	dentate	pinnate	non-looped	F	F	F	no	no	no	no	no	no	no
SNSD, MMG_PB	Sf._1670 (I)	1	1		Seifhennersdorf	Lower Oligocene	Betulaceae	Carpinus	Carpinus_grandis	deciduous	tree	unlobed	dentate	pinnate	non-looped	F	F	F	no	no	no	no	no	no	no
SNSD, MMG_PB	Sf._1670 (II)	1	1		Seifhennersdorf	Lower Oligocene	Betulaceae	Carpinus	Carpinus_grandis	deciduous	tree	unlobed	dentate	pinnate	non-looped	F	F	F	no	no	no	no	no	no	no
SNSD, MMG_PB	Sf._1671	1			Seifhennersdorf	Lower Oligocene	Betulaceae	Carpinus	Carpinus_grandis	deciduous	tree	unlobed	dentate	pinnate	non-looped	F	F	F	no	no	no	no	no	no	no
SNSD, MMG_PB	Sf._1672	1	1		Seifhennersdorf	Lower Oligocene	Betulaceae	Carpinus	Carpinus_grandis	deciduous	tree	unlobed	dentate	pinnate	non-looped	F	F	F	yes	yes	no	no	no	no	no	78
SNSD, MMG_PB	Sf._1673	1			Seifhennersdorf	Lower Oligocene	Betulaceae	Carpinus	Carpinus_grandis	deciduous	tree	unlobed	dentate	pinnate	non-looped	F	F	F	no	no	no	no	no	no	no
SNSD, MMG_PB	Sf._1676	1			Seifhennersdorf	Lower Oligocene	Betulaceae	Carpinus	Carpinus_grandis	deciduous	tree	unlobed	dentate	pinnate	non-looped	F	F	F	no	no	no	no	no	no	no
SNSD, MMG_PB	Sf._1677	1			Seifhennersdorf	Lower Oligocene	Betulaceae	Carpinus	Carpinus_grandis	deciduous	tree	unlobed	dentate	pinnate	non-looped	F	F	F	no	no	no	no	no	no	no
SNSD, MMG_PB	Sf._1679	1			Seifhennersdorf	Lower Oligocene	Betulaceae	Carpinus	Carpinus_grandis	deciduous	tree	unlobed	dentate	pinnate	non-looped	F	F	F	no	no	no	no	no	no	no
SNSD, MMG_PB	Sf._1680 (II)	1			Seifhennersdorf	Lower Oligocene	Betulaceae	Carpinus	Carpinus_grandis	deciduous	tree	unlobed	dentate	pinnate	non-looped	F	F	F	no	no	no	no	no	no	no
SNSD, MMG_PB	Sf._1681	1	1		Seifhennersdorf	Lower Oligocene	Betulaceae	Carpinus	Carpinus_grandis	deciduous	tree	unlobed	dentate	pinnate	non-looped	F	F	F	no	no	no	no	no	no	no
SNSD, MMG_PB	Sf._1682 (I)	1			Seifhennersdorf	Lower Oligocene	Betulaceae	Carpinus	Carpinus_grandis	deciduous	tree	unlobed	dentate	pinnate	non-looped	F	F	F	no	no	no	no	no	no	no
SNSD, MMG_PB	Sf._1683	1			Seifhennersdorf	Lower Oligocene	Betulaceae	Carpinus	Carpinus_grandis	deciduous	tree	unlobed	dentate	pinnate	non-looped	F	F	F	no	no	no	no	no	no	no
SNSD, MMG_PB	Sf._1684	1			Seifhennersdorf	Lower Oligocene	Betulaceae	Carpinus	Carpinus_grandis	deciduous	tree	unlobed	dentate	pinnate	non-looped	F	F	F	no	no	no	no	no	no	no
SNSD, MMG_PB	Sf._1686	1	1		Seifhennersdorf	Lower Oligocene	Betulaceae	Carpinus	Carpinus_grandis	deciduous	tree	unlobed	dentate	pinnate	non-looped	F	F	F	no	no	no	no	no	no	no
SNSD, MMG_PB	Sf._1687	1			Seifhennersdorf	Lower Oligocene	Betulaceae	Carpinus	Carpinus_grandis	deciduous	tree	unlobed	dentate	pinnate	non-looped	F	F	F	no	no	no	no	no	no	no
SNSD, MMG_PB	Sf._1688	1			Seifhennersdorf	Lower Oligocene	Betulaceae	Carpinus	Carpinus_grandis	deciduous	tree	unlobed	dentate	pinnate	non-looped	F	F	F	no	no	no	no	no	no	no
SNSD, MMG_PB	Sf._1689	1	1		Seifhennersdorf	Lower Oligocene	Betulaceae	Carpinus	Carpinus_grandis	deciduous	tree	unlobed	dentate	pinnate	non-looped	F	F	F	no	no	no	no	no	no	no
SNSD, MMG_PB	Sf._1690	1			Seifhennersdorf	Lower Oligocene	Betulaceae	Carpinus	Carpinus_grandis	deciduous	tree	unlobed	dentate	pinnate	non-looped	F	F	F	no	no	no	no	no	no	no
SNSD, MMG_PB	Sf._1691:1,2	1			Seifhennersdorf	Lower Oligocene	Betulaceae	Carpinus	Carpinus_grandis	deciduous	tree	unlobed	dentate	pinnate	non-looped	F	F	F	yes	yes	no	no	no	no	no	78
SNSD, MMG_PB	Sf._1692	1			Seifhennersdorf	Lower Oligocene	Betulaceae	Carpinus	Carpinus_grandis	deciduous	tree	unlobed	dentate	pinnate	non-looped	F	F	F	no	no	no	no	no	no	no
SNSD, MMG_PB	Sf._1693:1,2	1			Seifhennersdorf	Lower Oligocene	Betulaceae	Carpinus	Carpinus_grandis	deciduous	tree	unlobed	dentate	pinnate	non-looped	F	F	F	no	no	no	no	no	no	no
SNSD, MMG_PB	Sf._1694	1			Seifhennersdorf	Lower Oligocene	Betulaceae	Carpinus	Carpinus_grandis	deciduous	tree	unlobed	dentate	pinnate	non-looped	F	F	F	no	no	no	no	no	no	no
SNSD, MMG_PB	Sf._1695	1			Seifhennersdorf	Lower Oligocene	Betulaceae	Carpinus	Carpinus_grandis	deciduous	tree	unlobed	dentate	pinnate	non-looped	F	F	F	no	no	no	no	no	no	no
SNSD, MMG_PB	Sf._1696	1	1		Seifhennersdorf	Lower Oligocene	Betulaceae	Carpinus	Carpinus_grandis	deciduous	tree	unlobed	dentate	pinnate	non-looped	F	F	F	no	no	no	no	no	no	no
SNSD, MMG_PB	Sf._1697	1			Seifhennersdorf	Lower Oligocene	Betulaceae	Carpinus	Carpinus_grandis	deciduous	tree	unlobed	dentate	pinnate	non-looped	F	F	F	no	no	no	no	no	no	no
SNSD, MMG_PB	Sf._1698 (I)	1	1		Seifhennersdorf	Lower Oligocene	Betulaceae	Carpinus	Carpinus_grandis	deciduous	tree	unlobed	dentate	pinnate	non-looped	F	F	F	no	no	no	no	no	no	no
SNSD, MMG_PB	Sf._1699	1			Seifhennersdorf	Lower Oligocene	Betulaceae	Carpinus	Carpinus_grandis	deciduous	tree	unlobed	dentate	pinnate	non-looped	F	F	F	no	no	no	no	no	no	no
SNSD, MMG_PB	Sf._1700	1	1		Seifhennersdorf	Lower Oligocene	Betulaceae	Carpinus	Carpinus_grandis	deciduous	tree	unlobed	dentate	pinnate	non-looped	F	F	F	no	no	no	no	no	no	no
SNSD, MMG_PB	Sf._1701	1			Seifhennersdorf	Lower Oligocene	Betulaceae	Carpinus	Carpinus_grandis	deciduous	tree	unlobed	dentate	pinnate	non-looped	F	F	F	no	no	no	no	no	no	no
SNSD, MMG_PB	Sf._1702	1			Seifhennersdorf	Lower Oligocene	Betulaceae	Carpinus	Carpinus_grandis	deciduous	tree	unlobed	dentate	pinnate	non-looped	F	F	F	no	no	no	no	no	no	no
SNSD, MMG_PB	Sf._1704	1			Seifhennersdorf	Lower Oligocene	Betulaceae	Carpinus	Carpinus_grandis	deciduous	tree	unlobed	dentate	pinnate	non-looped	F	F	F	no	no	no	no	no	no	no
SNSD, MMG_PB	Sf._1707	1			Seifhennersdorf	Lower Oligocene	Betulaceae	Carpinus	Carpinus_grandis	deciduous	tree	unlobed	dentate	pinnate	non-looped	F	F	F	no	no	no	no	no	no	no
SNSD, MMG_PB	Sf._1711:1,2	1			Seifhennersdorf	Lower Oligocene	Betulaceae	Carpinus	Carpinus_grandis	deciduous	tree	unlobed	dentate	pinnate	non-looped	F	F	F	no	no	no	no	no	no	no
SNSD, MMG_PB	Sf._1715	1			Seifhennersdorf	Lower Oligocene	Betulaceae	Carpinus	Carpinus_grandis	deciduous	tree	unlobed	dentate	pinnate	non-looped	F	F	F	no	no	no	no	no	no	no
SNSD, MMG_PB	Sf._1716:1,2	1	1		Seifhennersdorf	Lower Oligocene	Betulaceae	Carpinus	Carpinus_grandis	deciduous	tree	unlobed	dentate	pinnate	non-looped	F	F	F	no	no	no	no	no	no	no
SNSD, MMG_PB	Sf._1717	1			Seifhennersdorf	Lower Oligocene	Betulaceae	Carpinus	Carpinus_grandis	deciduous	tree	unlobed	dentate	pinnate	non-looped	F	F	F	no	no	no	no	no	no	no
SNSD, MMG_PB	Sf._1718	1	1		Seifhennersdorf	Lower Oligocene	Betulaceae	Carpinus	Carpinus_grandis	deciduous	tree	unlobed	dentate	pinnate	non-looped	F	F	F	no	no	no	no	no	no	no
SNSD, MMG_PB	Sf._1719	1	1		Seifhennersdorf	Lower Oligocene	Betulaceae	Carpinus	Carpinus_grandis	deciduous	tree	unlobed	dentate	pinnate	non-looped	F	F	F	no	no	no	no	no	no	no
SNSD, MMG_PB	Sf._1720	1	1		Seifhennersdorf	Lower Oligocene	Betulaceae	Carpinus	Carpinus_grandis	deciduous	tree	unlobed	dentate	pinnate	non-looped	F	F	F	no	no	no	no	no	no	no
SNSD, MMG_PB	Sf._1722:1,2	1			Seifhennersdorf	Lower Oligocene	Betulaceae	Carpinus	Carpinus_grandis	deciduous	tree	unlobed	dentate	pinnate	non-looped	F	F	F	no	no	no	no	no	no	no
SNSD, MMG_PB	Sf._1723:1,2	1			Seifhennersdorf	Lower Oligocene	Betulaceae	Carpinus	Carpinus_grandis	deciduous	tree	unlobed	dentate	pinnate	non-looped	F	F	F	no	no	no	no	no	no	no
SNSD, MMG_PB	Sf._1724	1	1		Seifhennersdorf	Lower Oligocene	Betulaceae	Carpinus	Carpinus_grandis	deciduous	tree	unlobed	dentate	pinnate	non-looped	F	F	F	no	no	no	no	no	no	no
SNSD, MMG_PB	Sf._1725	1	1		Seifhennersdorf	Lower Oligocene	Betulaceae	Carpinus	Carpinus_grandis	deciduous	tree	unlobed	dentate	pinnate	non-looped	F	F	F	no	no	no	no	no	no	no
SNSD, MMG_PB	Sf._1726	1			Seifhennersdorf	Lower Oligocene	Betulaceae	Carpinus	Carpinus_grandis	deciduous	tree	unlobed	dentate	pinnate	non-looped	F	F	F	no	no	no	no	no	no	no
SNSD, MMG_PB	Sf._1727:1,2	1			Seifhennersdorf	Lower Oligocene	Betulaceae	Carpinus	Carpinus_grandis	deciduous	tree	unlobed	dentate	pinnate	non-looped	F	F	F	no	no	no	no	no	no	no
SNSD, MMG_PB	Sf._1728	1			Seifhennersdorf	Lower Oligocene	Betulaceae	Carpinus	Carpinus_grandis	deciduous	tree	unlobed	dentate	pinnate	non-looped	F	F	F	no	no	no	no	no	no	no
SNSD, MMG_PB	Sf._1729	1			Seifhennersdorf	Lower Oligocene	Betulaceae	Carpinus	Carpinus_grandis	deciduous	tree	unlobed	dentate	pinnate	non-looped	F	F	F	no	no	no	no	no	no	no
SNSD, MMG_PB	Sf._1730	1			Seifhennersdorf	Lower Oligocene	Betulaceae	Carpinus	Carpinus_grandis	deciduous	tree	unlobed	dentate	pinnate	non-looped	F	F	F	no	no	no	no	no	no	no
SNSD, MMG_PB	Sf._1731	1	1		Seifhennersdorf	Lower Oligocene	Betulaceae	Carpinus	Carpinus_grandis	deciduous	tree	unlobed	dentate	pinnate	non-looped	F	F	F	no	no	no	no	no	no	no
SNSD, MMG_PB	Sf._1732:1,2	1			Seifhennersdorf	Lower Oligocene	Betulaceae	Carpinus	Carpinus_grandis	deciduous	tree	unlobed	dentate	pinnate	non-looped	F	F	F	no	no	no	no	no	no	no
SNSD, MMG_PB	Sf._1734:1,2	1	1		Seifhennersdorf	Lower Oligocene	Betulaceae	Carpinus	Carpinus_grandis	deciduous	tree	unlobed	dentate	pinnate	non-looped	F	F	F	no	no	no	no	no	no	no
SNSD, MMG_PB	Sf._1735	1			Seifhennersdorf	Lower Oligocene	Betulaceae	Carpinus	Carpinus_grandis	deciduous	tree	unlobed	dentate	pinnate	non-looped	F	F	F	no	no	no	no	no	no	no
SNSD, MMG_PB	Sf._1736	1			Seifhennersdorf	Lower Oligocene	Betulaceae	Carpinus	Carpinus_grandis	deciduous	tree	unlobed	dentate	pinnate	non-looped	F	F	F	no	no	no	no	no	no	no
SNSD, MMG_PB	Sf._1737	1			Seifhennersdorf	Lower Oligocene	Betulaceae	Carpinus	Carpinus_grandis	deciduous	tree	unlobed	dentate	pinnate	non-looped	F	F	F	no	no	no	no	no	no	no
SNSD, MMG_PB	Sf._1738	1	1	1	Seifhennersdorf	Lower Oligocene	Betulaceae	Carpinus	Carpinus_grandis	deciduous	tree	unlobed	dentate	pinnate	non-looped	F	F	F	no	no	no	no	no	no	no
SNSD, MMG_PB	Sf._1739	1			Seifhennersdorf	Lower Oligocene	Betulaceae	Carpinus	Carpinus_grandis	deciduous	tree	unlobed	dentate	pinnate	non-looped	F	F	F	no	no	no	no	no	no	no
SNSD, MMG_PB	Sf._1740	1			Seifhennersdorf	Lower Oligocene	Betulaceae	Carpinus	Carpinus_grandis	deciduous	tree	unlobed	dentate	pinnate	non-looped	F	F	F	no	no	no	no	no	no	no
SNSD, MMG_PB	Sf._1741	1	1		Seifhennersdorf	Lower Oligocene	Betulaceae	Carpinus	Carpinus_grandis	deciduous	tree	unlobed	dentate	pinnate	non-looped	F	F	F	no	no	no	no	no	no	no
SNSD, MMG_PB	Sf._1742	1			Seifhennersdorf	Lower Oligocene	Betulaceae	Carpinus	Carpinus_grandis	deciduous	tree	unlobed	dentate	pinnate	non-looped	F	F	F	no	no	no	no	no	no	no
SNSD, MMG_PB	Sf._1743:1,2	1			Seifhennersdorf	Lower Oligocene	Betulaceae	Carpinus	Carpinus_grandis	deciduous	tree	unlobed	dentate	pinnate	non-looped	F	F	F	no	no	no	no	no	no	no
SNSD, MMG_PB	Sf._1745	1	1		Seifhennersdorf	Lower Oligocene	Betulaceae	Carpinus	Carpinus_grandis	deciduous	tree	unlobed	dentate	pinnate	non-looped	F	F	F	no	no	no	no	no	no	no
SNSD, MMG_PB	Sf._1747	1			Seifhennersdorf	Lower Oligocene	Betulaceae	Carpinus	Carpinus_grandis	deciduous	tree	unlobed	dentate	pinnate	non-looped	F	F	F	no	no	no	no	no	no	no
SNSD, MMG_PB	Sf._1748	1			Seifhennersdorf	Lower Oligocene	Betulaceae	Carpinus	Carpinus_grandis	deciduous	tree	unlobed	dentate	pinnate	non-looped	F	F	F	no	no	no	no	no	no	no
SNSD, MMG_PB	Sf._1749	1			Seifhennersdorf	Lower Oligocene	Betulaceae	Carpinus	Carpinus_grandis	deciduous	tree	unlobed	dentate	pinnate	non-looped	F	F	F	no	no	no	no	no	no	no
SNSD, MMG_PB	Sf._1753	1			Seifhennersdorf	Lower Oligocene	Betulaceae	Carpinus	Carpinus_grandis	deciduous	tree	unlobed	dentate	pinnate	non-looped	F	F	F	no	no	no	no	no	no	no
SNSD, MMG_PB	Sf._1754:1,2	1			Seifhennersdorf	Lower Oligocene	Betulaceae	Carpinus	Carpinus_grandis	deciduous	tree	unlobed	dentate	pinnate	non-looped	F	F	F	no	no	no	no	no	no	no
SNSD, MMG_PB	Sf._1755	1	1		Seifhennersdorf	Lower Oligocene	Betulaceae	Carpinus	Carpinus_grandis	deciduous	tree	unlobed	dentate	pinnate	non-looped	F	F	F	no	no	no	no	no	no	no
SNSD, MMG_PB	Sf._1756	1			Seifhennersdorf	Lower Oligocene	Betulaceae	Carpinus	Carpinus_grandis	deciduous	tree	unlobed	dentate	pinnate	non-looped	F	F	F	no	no	no	no	no	no	no
SNSD, MMG_PB	Sf._1757	1			Seifhennersdorf	Lower Oligocene	Betulaceae	Carpinus	Carpinus_grandis	deciduous	tree	unlobed	dentate	pinnate	non-looped	F	F	F	no	no	no	no	no	no	no
SNSD, MMG_PB	Sf._1759	1			Seifhennersdorf	Lower Oligocene	Betulaceae	Carpinus	Carpinus_grandis	deciduous	tree	unlobed	dentate	pinnate	non-looped	F	F	F	no	no	no	no	no	no	no
SNSD, MMG_PB	Sf._1760	1			Seifhennersdorf	Lower Oligocene	Betulaceae	Carpinus	Carpinus_grandis	deciduous	tree	unlobed	dentate	pinnate	non-looped	F	F	F	no	no	no	no	no	no	no
SNSD, MMG_PB	Sf._1761	1			Seifhennersdorf	Lower Oligocene	Betulaceae	Carpinus	Carpinus_grandis	deciduous	tree	unlobed	dentate	pinnate	non-looped	F	F	F	no	no	no	no	no	no	no
SNSD, MMG_PB	Sf._1762	1	1		Seifhennersdorf	Lower Oligocene	Betulaceae	Carpinus	Carpinus_grandis	deciduous	tree	unlobed	dentate	pinnate	non-looped	F	F	F	no	no	no	no	no	no	no
SNSD, MMG_PB	Sf._1765:1,2	1	1		Seifhennersdorf	Lower Oligocene	Betulaceae	Carpinus	Carpinus_grandis	deciduous	tree	unlobed	dentate	pinnate	non-looped	F	F	F	yes	yes	no	no	no	no	no	2
SNSD, MMG_PB	Sf._1766a	1	1		Seifhennersdorf	Lower Oligocene	Betulaceae	Carpinus	Carpinus_grandis	deciduous	tree	unlobed	dentate	pinnate	non-looped	F	F	F	no	no	no	no	no	no	no
SNSD, MMG_PB	Sf._1766b	1	1		Seifhennersdorf	Lower Oligocene	Betulaceae	Carpinus	Carpinus_grandis	deciduous	tree	unlobed	dentate	pinnate	non-looped	F	F	F	no	no	no	no	no	no	no
SNSD, MMG_PB	Sf._1768	1			Seifhennersdorf	Lower Oligocene	Betulaceae	Carpinus	Carpinus_grandis	deciduous	tree	unlobed	dentate	pinnate	non-looped	F	F	F	no	no	no	no	no	no	no
SNSD, MMG_PB	Sf._1769	1	1		Seifhennersdorf	Lower Oligocene	Betulaceae	Carpinus	Carpinus_grandis	deciduous	tree	unlobed	dentate	pinnate	non-looped	F	F	F	no	no	no	no	no	no	no
SNSD, MMG_PB	Sf._1770	1			Seifhennersdorf	Lower Oligocene	Betulaceae	Carpinus	Carpinus_grandis	deciduous	tree	unlobed	dentate	pinnate	non-looped	F	F	F	no	no	no	no	no	no	no
SNSD, MMG_PB	Sf._1771	1			Seifhennersdorf	Lower Oligocene	Betulaceae	Carpinus	Carpinus_grandis	deciduous	tree	unlobed	dentate	pinnate	non-looped	F	F	F	no	no	no	no	no	no	no
SNSD, MMG_PB	Sf._1772	1			Seifhennersdorf	Lower Oligocene	Betulaceae	Carpinus	Carpinus_grandis	deciduous	tree	unlobed	dentate	pinnate	non-looped	F	F	F	no	no	no	no	no	no	no
SNSD, MMG_PB	Sf._1773	1			Seifhennersdorf	Lower Oligocene	Betulaceae	Carpinus	Carpinus_grandis	deciduous	tree	unlobed	dentate	pinnate	non-looped	F	F	F	no	no	no	no	no	no	no
SNSD, MMG_PB	Sf._1774	1			Seifhennersdorf	Lower Oligocene	Betulaceae	Carpinus	Carpinus_grandis	deciduous	tree	unlobed	dentate	pinnate	non-looped	F	F	F	no	no	no	no	no	no	no
SNSD, MMG_PB	Sf._1775	1	1		Seifhennersdorf	Lower Oligocene	Betulaceae	Carpinus	Carpinus_grandis	deciduous	tree	unlobed	dentate	pinnate	non-looped	F	F	F	no	no	no	no	no	no	no
SNSD, MMG_PB	Sf._1778:1,2	1			Seifhennersdorf	Lower Oligocene	Betulaceae	Carpinus	Carpinus_grandis	deciduous	tree	unlobed	dentate	pinnate	non-looped	F	F	F	no	no	no	no	no	no	no
SNSD, MMG_PB	Sf._1779	1			Seifhennersdorf	Lower Oligocene	Betulaceae	Carpinus	Carpinus_grandis	deciduous	tree	unlobed	dentate	pinnate	non-looped	F	F	F	no	no	no	no	no	no	no
SNSD, MMG_PB	Sf._1780	1	1		Seifhennersdorf	Lower Oligocene	Betulaceae	Carpinus	Carpinus_grandis	deciduous	tree	unlobed	dentate	pinnate	non-looped	F	F	F	no	no	no	no	no	no	no
SNSD, MMG_PB	Sf._1781	1			Seifhennersdorf	Lower Oligocene	Betulaceae	Carpinus	Carpinus_grandis	deciduous	tree	unlobed	dentate	pinnate	non-looped	F	F	F	no	no	no	no	no	no	no
SNSD, MMG_PB	Sf._1784	1			Seifhennersdorf	Lower Oligocene	Betulaceae	Carpinus	Carpinus_grandis	deciduous	tree	unlobed	dentate	pinnate	non-looped	F	F	F	no	no	no	no	no	no	no
SNSD, MMG_PB	Sf._1785	1			Seifhennersdorf	Lower Oligocene	Betulaceae	Carpinus	Carpinus_grandis	deciduous	tree	unlobed	dentate	pinnate	non-looped	F	F	F	no	no	no	no	no	no	no
SNSD, MMG_PB	Sf._1786	1	1		Seifhennersdorf	Lower Oligocene	Betulaceae	Carpinus	Carpinus_grandis	deciduous	tree	unlobed	dentate	pinnate	non-looped	F	F	F	no	no	no	no	no	no	no
SNSD, MMG_PB	Sf._1787	1			Seifhennersdorf	Lower Oligocene	Betulaceae	Carpinus	Carpinus_grandis	deciduous	tree	unlobed	dentate	pinnate	non-looped	F	F	F	no	no	no	no	no	no	no
SNSD, MMG_PB	Sf._1788	1			Seifhennersdorf	Lower Oligocene	Betulaceae	Carpinus	Carpinus_grandis	deciduous	tree	unlobed	dentate	pinnate	non-looped	F	F	F	no	no	no	no	no	no	no
SNSD, MMG_PB	Sf._1790:1,2	1			Seifhennersdorf	Lower Oligocene	Betulaceae	Carpinus	Carpinus_grandis	deciduous	tree	unlobed	dentate	pinnate	non-looped	F	F	F	no	no	no	no	no	no	no
SNSD, MMG_PB	Sf._1792	1	1		Seifhennersdorf	Lower Oligocene	Betulaceae	Carpinus	Carpinus_grandis	deciduous	tree	unlobed	dentate	pinnate	non-looped	F	F	F	no	no	no	no	no	no	no
SNSD, MMG_PB	Sf._1793	1	1		Seifhennersdorf	Lower Oligocene	Betulaceae	Carpinus	Carpinus_grandis	deciduous	tree	unlobed	dentate	pinnate	non-looped	F	F	F	no	no	no	no	no	no	no
SNSD, MMG_PB	Sf._1794	1			Seifhennersdorf	Lower Oligocene	Betulaceae	Carpinus	Carpinus_grandis	deciduous	tree	unlobed	dentate	pinnate	non-looped	F	F	F	no	no	no	no	no	no	no
SNSD, MMG_PB	Sf._1795	1			Seifhennersdorf	Lower Oligocene	Betulaceae	Carpinus	Carpinus_grandis	deciduous	tree	unlobed	dentate	pinnate	non-looped	F	F	F	no	no	no	no	no	no	no
SNSD, MMG_PB	Sf._1796	1			Seifhennersdorf	Lower Oligocene	Betulaceae	Carpinus	Carpinus_grandis	deciduous	tree	unlobed	dentate	pinnate	non-looped	F	F	F	no	no	no	no	no	no	no
SNSD, MMG_PB	Sf._1797	1	1		Seifhennersdorf	Lower Oligocene	Betulaceae	Carpinus	Carpinus_grandis	deciduous	tree	unlobed	dentate	pinnate	non-looped	F	F	F	no	no	no	no	no	no	no
SNSD, MMG_PB	Sf._1798	1			Seifhennersdorf	Lower Oligocene	Betulaceae	Carpinus	Carpinus_grandis	deciduous	tree	unlobed	dentate	pinnate	non-looped	F	F	F	no	no	no	no	no	no	no
SNSD, MMG_PB	Sf._1799	1			Seifhennersdorf	Lower Oligocene	Betulaceae	Carpinus	Carpinus_grandis	deciduous	tree	unlobed	dentate	pinnate	non-looped	F	F	F	no	no	no	no	no	no	no
SNSD, MMG_PB	Sf._1802	1			Seifhennersdorf	Lower Oligocene	Betulaceae	Carpinus	Carpinus_grandis	deciduous	tree	unlobed	dentate	pinnate	non-looped	F	F	F	no	no	no	no	no	no	no
SNSD, MMG_PB	Sf._1803	1			Seifhennersdorf	Lower Oligocene	Betulaceae	Carpinus	Carpinus_grandis	deciduous	tree	unlobed	dentate	pinnate	non-looped	F	F	F	no	no	no	no	no	no	no
SNSD, MMG_PB	Sf._1804	1			Seifhennersdorf	Lower Oligocene	Betulaceae	Carpinus	Carpinus_grandis	deciduous	tree	unlobed	dentate	pinnate	non-looped	F	F	F	no	no	no	no	no	no	no
SNSD, MMG_PB	Sf._1806	1	1		Seifhennersdorf	Lower Oligocene	Betulaceae	Carpinus	Carpinus_grandis	deciduous	tree	unlobed	dentate	pinnate	non-looped	F	F	F	no	no	no	no	no	no	no
SNSD, MMG_PB	Sf._1807	1			Seifhennersdorf	Lower Oligocene	Betulaceae	Carpinus	Carpinus_grandis	deciduous	tree	unlobed	dentate	pinnate	non-looped	F	F	F	no	no	no	no	no	no	no
SNSD, MMG_PB	Sf._1808	1			Seifhennersdorf	Lower Oligocene	Betulaceae	Carpinus	Carpinus_grandis	deciduous	tree	unlobed	dentate	pinnate	non-looped	F	F	F	no	no	no	no	no	no	no
SNSD, MMG_PB	Sf._1809	1			Seifhennersdorf	Lower Oligocene	Betulaceae	Carpinus	Carpinus_grandis	deciduous	tree	unlobed	dentate	pinnate	non-looped	F	F	F	no	no	no	no	no	no	no
SNSD, MMG_PB	Sf._1810	1			Seifhennersdorf	Lower Oligocene	Betulaceae	Carpinus	Carpinus_grandis	deciduous	tree	unlobed	dentate	pinnate	non-looped	F	F	F	no	no	no	no	no	no	no
SNSD, MMG_PB	Sf._1811	1	1		Seifhennersdorf	Lower Oligocene	Betulaceae	Carpinus	Carpinus_grandis	deciduous	tree	unlobed	dentate	pinnate	non-looped	F	F	F	no	no	no	no	no	no	no
SNSD, MMG_PB	Sf._1812	1			Seifhennersdorf	Lower Oligocene	Betulaceae	Carpinus	Carpinus_grandis	deciduous	tree	unlobed	dentate	pinnate	non-looped	F	F	F	no	no	no	no	no	no	no
SNSD, MMG_PB	Sf._1814	1	1		Seifhennersdorf	Lower Oligocene	Betulaceae	Carpinus	Carpinus_grandis	deciduous	tree	unlobed	dentate	pinnate	non-looped	F	F	F	no	no	no	no	no	no	no
SNSD, MMG_PB	Sf._1816a	1			Seifhennersdorf	Lower Oligocene	Betulaceae	Carpinus	Carpinus_grandis	deciduous	tree	unlobed	dentate	pinnate	non-looped	F	F	F	no	no	no	no	no	no	no
SNSD, MMG_PB	Sf._1817	1			Seifhennersdorf	Lower Oligocene	Betulaceae	Carpinus	Carpinus_grandis	deciduous	tree	unlobed	dentate	pinnate	non-looped	F	F	F	no	no	no	no	no	no	no
SNSD, MMG_PB	Sf._1818	1	1		Seifhennersdorf	Lower Oligocene	Betulaceae	Carpinus	Carpinus_grandis	deciduous	tree	unlobed	dentate	pinnate	non-looped	F	F	F	no	no	no	no	no	no	no
SNSD, MMG_PB	Sf._1819	1			Seifhennersdorf	Lower Oligocene	Betulaceae	Carpinus	Carpinus_grandis	deciduous	tree	unlobed	dentate	pinnate	non-looped	F	F	F	no	no	no	no	no	no	no
SNSD, MMG_PB	Sf._1820	1			Seifhennersdorf	Lower Oligocene	Betulaceae	Carpinus	Carpinus_grandis	deciduous	tree	unlobed	dentate	pinnate	non-looped	F	F	F	no	no	no	no	no	no	no
SNSD, MMG_PB	Sf._1821	1			Seifhennersdorf	Lower Oligocene	Betulaceae	Carpinus	Carpinus_grandis	deciduous	tree	unlobed	dentate	pinnate	non-looped	F	F	F	no	no	no	no	no	no	no
SNSD, MMG_PB	Sf._1822	1			Seifhennersdorf	Lower Oligocene	Betulaceae	Carpinus	Carpinus_grandis	deciduous	tree	unlobed	dentate	pinnate	non-looped	F	F	F	no	no	no	no	no	no	no
SNSD, MMG_PB	Sf._1823	1			Seifhennersdorf	Lower Oligocene	Betulaceae	Carpinus	Carpinus_grandis	deciduous	tree	unlobed	dentate	pinnate	non-looped	F	F	F	no	no	no	no	no	no	no
SNSD, MMG_PB	Sf._1824	1			Seifhennersdorf	Lower Oligocene	Betulaceae	Carpinus	Carpinus_grandis	deciduous	tree	unlobed	dentate	pinnate	non-looped	F	F	F	no	no	no	no	no	no	no
SNSD, MMG_PB	Sf._1825	1			Seifhennersdorf	Lower Oligocene	Betulaceae	Carpinus	Carpinus_grandis	deciduous	tree	unlobed	dentate	pinnate	non-looped	F	F	F	no	no	no	no	no	no	no
SNSD, MMG_PB	Sf._1826	1	1		Seifhennersdorf	Lower Oligocene	Betulaceae	Carpinus	Carpinus_grandis	deciduous	tree	unlobed	dentate	pinnate	non-looped	F	F	F	no	no	no	no	no	no	no
SNSD, MMG_PB	Sf._1827	1			Seifhennersdorf	Lower Oligocene	Betulaceae	Carpinus	Carpinus_grandis	deciduous	tree	unlobed	dentate	pinnate	non-looped	F	F	F	no	no	no	no	no	no	no
SNSD, MMG_PB	Sf._1828	1			Seifhennersdorf	Lower Oligocene	Betulaceae	Carpinus	Carpinus_grandis	deciduous	tree	unlobed	dentate	pinnate	non-looped	F	F	F	no	no	no	no	no	no	no
SNSD, MMG_PB	Sf._1830	1	1	1	Seifhennersdorf	Lower Oligocene	Betulaceae	Carpinus	Carpinus_grandis	deciduous	tree	unlobed	dentate	pinnate	non-looped	F	F	F	no	no	no	no	no	no	no
SNSD, MMG_PB	Sf._1831	1			Seifhennersdorf	Lower Oligocene	Betulaceae	Carpinus	Carpinus_grandis	deciduous	tree	unlobed	dentate	pinnate	non-looped	F	F	F	no	no	no	no	no	no	no
SNSD, MMG_PB	Sf._1833a	1	1		Seifhennersdorf	Lower Oligocene	Betulaceae	Carpinus	Carpinus_grandis	deciduous	tree	unlobed	dentate	pinnate	non-looped	F	F	F	no	no	no	no	no	no	no
SNSD, MMG_PB	Sf._1833b	1			Seifhennersdorf	Lower Oligocene	Betulaceae	Carpinus	Carpinus_grandis	deciduous	tree	unlobed	dentate	pinnate	non-looped	F	F	F	no	no	no	no	no	no	no
SNSD, MMG_PB	Sf._1834	1	1	1	Seifhennersdorf	Lower Oligocene	Betulaceae	Carpinus	Carpinus_grandis	deciduous	tree	unlobed	dentate	pinnate	non-looped	F	F	F	no	no	no	no	no	no	no
SNSD, MMG_PB	Sf._1835	1			Seifhennersdorf	Lower Oligocene	Betulaceae	Carpinus	Carpinus_grandis	deciduous	tree	unlobed	dentate	pinnate	non-looped	F	F	F	no	no	no	no	no	no	no
SNSD, MMG_PB	Sf._1837	1			Seifhennersdorf	Lower Oligocene	Betulaceae	Carpinus	Carpinus_grandis	deciduous	tree	unlobed	dentate	pinnate	non-looped	F	F	F	no	no	no	no	no	no	no
SNSD, MMG_PB	Sf._1839	1			Seifhennersdorf	Lower Oligocene	Betulaceae	Carpinus	Carpinus_grandis	deciduous	tree	unlobed	dentate	pinnate	non-looped	F	F	F	no	no	no	no	no	no	no
SNSD, MMG_PB	Sf._1840/1841	1			Seifhennersdorf	Lower Oligocene	Betulaceae	Carpinus	Carpinus_grandis	deciduous	tree	unlobed	dentate	pinnate	non-looped	F	F	F	yes	no	yes	no	no	no	no	12
SNSD, MMG_PB	Sf._1843	1			Seifhennersdorf	Lower Oligocene	Betulaceae	Carpinus	Carpinus_grandis	deciduous	tree	unlobed	dentate	pinnate	non-looped	F	F	F	no	no	no	no	no	no	no
SNSD, MMG_PB	Sf._1844	1			Seifhennersdorf	Lower Oligocene	Betulaceae	Carpinus	Carpinus_grandis	deciduous	tree	unlobed	dentate	pinnate	non-looped	F	F	F	no	no	no	no	no	no	no
SNSD, MMG_PB	Sf._1846	1			Seifhennersdorf	Lower Oligocene	Betulaceae	Carpinus	Carpinus_grandis	deciduous	tree	unlobed	dentate	pinnate	non-looped	F	F	F	no	no	no	no	no	no	no
SNSD, MMG_PB	Sf._1848	1	1		Seifhennersdorf	Lower Oligocene	Betulaceae	Carpinus	Carpinus_grandis	deciduous	tree	unlobed	dentate	pinnate	non-looped	F	F	F	no	no	no	no	no	no	no
SNSD, MMG_PB	Sf._1849	1			Seifhennersdorf	Lower Oligocene	Betulaceae	Carpinus	Carpinus_grandis	deciduous	tree	unlobed	dentate	pinnate	non-looped	F	F	F	no	no	no	no	no	no	no
SNSD, MMG_PB	Sf._1851	1	1		Seifhennersdorf	Lower Oligocene	Betulaceae	Carpinus	Carpinus_grandis	deciduous	tree	unlobed	dentate	pinnate	non-looped	F	F	F	no	no	no	no	no	no	no
SNSD, MMG_PB	Sf._1853	1			Seifhennersdorf	Lower Oligocene	Betulaceae	Carpinus	Carpinus_grandis	deciduous	tree	unlobed	dentate	pinnate	non-looped	F	F	F	no	no	no	no	no	no	no
SNSD, MMG_PB	Sf._1854	1			Seifhennersdorf	Lower Oligocene	Betulaceae	Carpinus	Carpinus_grandis	deciduous	tree	unlobed	dentate	pinnate	non-looped	F	F	F	no	no	no	no	no	no	no
SNSD, MMG_PB	Sf._1855a	1			Seifhennersdorf	Lower Oligocene	Betulaceae	Carpinus	Carpinus_grandis	deciduous	tree	unlobed	dentate	pinnate	non-looped	F	F	F	no	no	no	no	no	no	no
SNSD, MMG_PB	Sf._1855b	1			Seifhennersdorf	Lower Oligocene	Betulaceae	Carpinus	Carpinus_grandis	deciduous	tree	unlobed	dentate	pinnate	non-looped	F	F	F	no	no	no	no	no	no	no
SNSD, MMG_PB	Sf._1856	1			Seifhennersdorf	Lower Oligocene	Betulaceae	Carpinus	Carpinus_grandis	deciduous	tree	unlobed	dentate	pinnate	non-looped	F	F	F	no	no	no	no	no	no	no
SNSD, MMG_PB	Sf._1857/1850	1			Seifhennersdorf	Lower Oligocene	Betulaceae	Carpinus	Carpinus_grandis	deciduous	tree	unlobed	dentate	pinnate	non-looped	F	F	F	no	no	no	no	no	no	no
SNSD, MMG_PB	Sf._1860	1			Seifhennersdorf	Lower Oligocene	Betulaceae	Carpinus	Carpinus_grandis	deciduous	tree	unlobed	dentate	pinnate	non-looped	F	F	F	no	no	no	no	no	no	no
SNSD, MMG_PB	Sf._1861	1			Seifhennersdorf	Lower Oligocene	Betulaceae	Carpinus	Carpinus_grandis	deciduous	tree	unlobed	dentate	pinnate	non-looped	F	F	F	no	no	no	no	no	no	no
SNSD, MMG_PB	Sf._1862:1,2a	1	1		Seifhennersdorf	Lower Oligocene	Betulaceae	Carpinus	Carpinus_grandis	deciduous	tree	unlobed	dentate	pinnate	non-looped	F	F	F	no	no	no	no	no	no	no
SNSD, MMG_PB	Sf._1863	1	1		Seifhennersdorf	Lower Oligocene	Betulaceae	Carpinus	Carpinus_grandis	deciduous	tree	unlobed	dentate	pinnate	non-looped	F	F	F	no	no	no	no	no	no	no
SNSD, MMG_PB	Sf._1865	1			Seifhennersdorf	Lower Oligocene	Betulaceae	Carpinus	Carpinus_grandis	deciduous	tree	unlobed	dentate	pinnate	non-looped	F	F	F	no	no	no	no	no	no	no
SNSD, MMG_PB	Sf._1866	1			Seifhennersdorf	Lower Oligocene	Betulaceae	Carpinus	Carpinus_grandis	deciduous	tree	unlobed	dentate	pinnate	non-looped	F	F	F	yes	yes	no	no	no	no	no	78
SNSD, MMG_PB	Sf._1868	1			Seifhennersdorf	Lower Oligocene	Betulaceae	Carpinus	Carpinus_grandis	deciduous	tree	unlobed	dentate	pinnate	non-looped	F	F	F	no	no	no	no	no	no	no
SNSD, MMG_PB	Sf._1869	1			Seifhennersdorf	Lower Oligocene	Betulaceae	Carpinus	Carpinus_grandis	deciduous	tree	unlobed	dentate	pinnate	non-looped	F	F	F	no	no	no	no	no	no	no
SNSD, MMG_PB	Sf._1870a	1	1		Seifhennersdorf	Lower Oligocene	Betulaceae	Carpinus	Carpinus_grandis	deciduous	tree	unlobed	dentate	pinnate	non-looped	F	F	F	no	no	no	no	no	no	no
SNSD, MMG_PB	Sf._1870b	1	1		Seifhennersdorf	Lower Oligocene	Betulaceae	Carpinus	Carpinus_grandis	deciduous	tree	unlobed	dentate	pinnate	non-looped	F	F	F	no	no	no	no	no	no	no
SNSD, MMG_PB	Sf._1871	1			Seifhennersdorf	Lower Oligocene	Betulaceae	Carpinus	Carpinus_grandis	deciduous	tree	unlobed	dentate	pinnate	non-looped	F	F	F	no	no	no	no	no	no	no
SNSD, MMG_PB	Sf._1872	1			Seifhennersdorf	Lower Oligocene	Betulaceae	Carpinus	Carpinus_grandis	deciduous	tree	unlobed	dentate	pinnate	non-looped	F	F	F	no	no	no	no	no	no	no
SNSD, MMG_PB	Sf._1873	1			Seifhennersdorf	Lower Oligocene	Betulaceae	Carpinus	Carpinus_grandis	deciduous	tree	unlobed	dentate	pinnate	non-looped	F	F	F	yes	yes	no	no	no	no	no	2
SNSD, MMG_PB	Sf._1875	1	1		Seifhennersdorf	Lower Oligocene	Betulaceae	Carpinus	Carpinus_grandis	deciduous	tree	unlobed	dentate	pinnate	non-looped	F	F	F	no	no	no	no	no	no	no
SNSD, MMG_PB	Sf._1876	1			Seifhennersdorf	Lower Oligocene	Betulaceae	Carpinus	Carpinus_grandis	deciduous	tree	unlobed	dentate	pinnate	non-looped	F	F	F	no	no	no	no	no	no	no
SNSD, MMG_PB	Sf._1878	1	1		Seifhennersdorf	Lower Oligocene	Betulaceae	Carpinus	Carpinus_grandis	deciduous	tree	unlobed	dentate	pinnate	non-looped	F	F	F	no	no	no	no	no	no	no
SNSD, MMG_PB	Sf._1879	1			Seifhennersdorf	Lower Oligocene	Betulaceae	Carpinus	Carpinus_grandis	deciduous	tree	unlobed	dentate	pinnate	non-looped	F	F	F	no	no	no	no	no	no	no
SNSD, MMG_PB	Sf._1880	1	1		Seifhennersdorf	Lower Oligocene	Betulaceae	Carpinus	Carpinus_grandis	deciduous	tree	unlobed	dentate	pinnate	non-looped	F	F	F	no	no	no	no	no	no	no
SNSD, MMG_PB	Sf._1881	1			Seifhennersdorf	Lower Oligocene	Betulaceae	Carpinus	Carpinus_grandis	deciduous	tree	unlobed	dentate	pinnate	non-looped	F	F	F	no	no	no	no	no	no	no
SNSD, MMG_PB	Sf._1883	1			Seifhennersdorf	Lower Oligocene	Betulaceae	Carpinus	Carpinus_grandis	deciduous	tree	unlobed	dentate	pinnate	non-looped	F	F	F	no	no	no	no	no	no	no
SNSD, MMG_PB	Sf._1884	1			Seifhennersdorf	Lower Oligocene	Betulaceae	Carpinus	Carpinus_grandis	deciduous	tree	unlobed	dentate	pinnate	non-looped	F	F	F	no	no	no	no	no	no	no
SNSD, MMG_PB	Sf._1885	1			Seifhennersdorf	Lower Oligocene	Betulaceae	Carpinus	Carpinus_grandis	deciduous	tree	unlobed	dentate	pinnate	non-looped	F	F	F	no	no	no	no	no	no	no
SNSD, MMG_PB	Sf._1886	1			Seifhennersdorf	Lower Oligocene	Betulaceae	Carpinus	Carpinus_grandis	deciduous	tree	unlobed	dentate	pinnate	non-looped	F	F	F	no	no	no	no	no	no	no
SNSD, MMG_PB	Sf._1888	1			Seifhennersdorf	Lower Oligocene	Betulaceae	Carpinus	Carpinus_grandis	deciduous	tree	unlobed	dentate	pinnate	non-looped	F	F	F	no	no	no	no	no	no	no
SNSD, MMG_PB	Sf._1890	1			Seifhennersdorf	Lower Oligocene	Betulaceae	Carpinus	Carpinus_grandis	deciduous	tree	unlobed	dentate	pinnate	non-looped	F	F	F	yes	yes	no	no	no	no	no	78
SNSD, MMG_PB	Sf._1891	1			Seifhennersdorf	Lower Oligocene	Betulaceae	Carpinus	Carpinus_grandis	deciduous	tree	unlobed	dentate	pinnate	non-looped	F	F	F	no	no	no	no	no	no	no
SNSD, MMG_PB	Sf._1892	1			Seifhennersdorf	Lower Oligocene	Betulaceae	Carpinus	Carpinus_grandis	deciduous	tree	unlobed	dentate	pinnate	non-looped	F	F	F	no	no	no	no	no	no	no
SNSD, MMG_PB	Sf._1893	1	1		Seifhennersdorf	Lower Oligocene	Betulaceae	Carpinus	Carpinus_grandis	deciduous	tree	unlobed	dentate	pinnate	non-looped	F	F	F	no	no	no	no	no	no	no
SNSD, MMG_PB	Sf._1894	1			Seifhennersdorf	Lower Oligocene	Betulaceae	Carpinus	Carpinus_grandis	deciduous	tree	unlobed	dentate	pinnate	non-looped	F	F	F	no	no	no	no	no	no	no
SNSD, MMG_PB	Sf._1895	1			Seifhennersdorf	Lower Oligocene	Betulaceae	Carpinus	Carpinus_grandis	deciduous	tree	unlobed	dentate	pinnate	non-looped	F	F	F	no	no	no	no	no	no	no
SNSD, MMG_PB	Sf._1896	1			Seifhennersdorf	Lower Oligocene	Betulaceae	Carpinus	Carpinus_grandis	deciduous	tree	unlobed	dentate	pinnate	non-looped	F	F	F	no	no	no	no	no	no	no
SNSD, MMG_PB	Sf._1897	1			Seifhennersdorf	Lower Oligocene	Betulaceae	Carpinus	Carpinus_grandis	deciduous	tree	unlobed	dentate	pinnate	non-looped	F	F	F	no	no	no	no	no	no	no
SNSD, MMG_PB	Sf._1899	1			Seifhennersdorf	Lower Oligocene	Betulaceae	Carpinus	Carpinus_grandis	deciduous	tree	unlobed	dentate	pinnate	non-looped	F	F	F	no	no	no	no	no	no	no
SNSD, MMG_PB	Sf._1900	1			Seifhennersdorf	Lower Oligocene	Betulaceae	Carpinus	Carpinus_grandis	deciduous	tree	unlobed	dentate	pinnate	non-looped	F	F	F	no	no	no	no	no	no	no
SNSD, MMG_PB	Sf._1901	1			Seifhennersdorf	Lower Oligocene	Betulaceae	Carpinus	Carpinus_grandis	deciduous	tree	unlobed	dentate	pinnate	non-looped	F	F	F	no	no	no	no	no	no	no
SNSD, MMG_PB	Sf._1902	1			Seifhennersdorf	Lower Oligocene	Betulaceae	Carpinus	Carpinus_grandis	deciduous	tree	unlobed	dentate	pinnate	non-looped	F	F	F	no	no	no	no	no	no	no
SNSD, MMG_PB	Sf._1904	1	1		Seifhennersdorf	Lower Oligocene	Betulaceae	Carpinus	Carpinus_grandis	deciduous	tree	unlobed	dentate	pinnate	non-looped	F	F	F	no	no	no	no	no	no	no
SNSD, MMG_PB	Sf._1908	1			Seifhennersdorf	Lower Oligocene	Betulaceae	Carpinus	Carpinus_grandis	deciduous	tree	unlobed	dentate	pinnate	non-looped	F	F	F	no	no	no	no	no	no	no
SNSD, MMG_PB	Sf._1912	1	1	1	Seifhennersdorf	Lower Oligocene	Betulaceae	Carpinus	Carpinus_grandis	deciduous	tree	unlobed	dentate	pinnate	non-looped	F	F	F	no	no	no	no	no	no	no
SNSD, MMG_PB	Sf._1913/1903	1			Seifhennersdorf	Lower Oligocene	Betulaceae	Carpinus	Carpinus_grandis	deciduous	tree	unlobed	dentate	pinnate	non-looped	F	F	F	no	no	no	no	no	no	no
SNSD, MMG_PB	Sf._1915	1			Seifhennersdorf	Lower Oligocene	Betulaceae	Carpinus	Carpinus_grandis	deciduous	tree	unlobed	dentate	pinnate	non-looped	F	F	F	no	no	no	no	no	no	no
SNSD, MMG_PB	Sf._1916	1			Seifhennersdorf	Lower Oligocene	Betulaceae	Carpinus	Carpinus_grandis	deciduous	tree	unlobed	dentate	pinnate	non-looped	F	F	F	no	no	no	no	no	no	no
SNSD, MMG_PB	Sf._1918	1			Seifhennersdorf	Lower Oligocene	Betulaceae	Carpinus	Carpinus_grandis	deciduous	tree	unlobed	dentate	pinnate	non-looped	F	F	F	no	no	no	no	no	no	no
SNSD, MMG_PB	Sf._1919	1			Seifhennersdorf	Lower Oligocene	Betulaceae	Carpinus	Carpinus_grandis	deciduous	tree	unlobed	dentate	pinnate	non-looped	F	F	F	no	no	no	no	no	no	no
SNSD, MMG_PB	Sf._1920	1			Seifhennersdorf	Lower Oligocene	Betulaceae	Carpinus	Carpinus_grandis	deciduous	tree	unlobed	dentate	pinnate	non-looped	F	F	F	no	no	no	no	no	no	no
SNSD, MMG_PB	Sf._1921	1	1	1	Seifhennersdorf	Lower Oligocene	Betulaceae	Carpinus	Carpinus_grandis	deciduous	tree	unlobed	dentate	pinnate	non-looped	F	F	F	no	no	no	no	no	no	no
SNSD, MMG_PB	Sf._1923	1	1	1	Seifhennersdorf	Lower Oligocene	Betulaceae	Carpinus	Carpinus_grandis	deciduous	tree	unlobed	dentate	pinnate	non-looped	F	F	F	no	no	no	no	no	no	no
SNSD, MMG_PB	Sf._1924	1			Seifhennersdorf	Lower Oligocene	Betulaceae	Carpinus	Carpinus_grandis	deciduous	tree	unlobed	dentate	pinnate	non-looped	F	F	F	no	no	no	no	no	no	no
SNSD, MMG_PB	Sf._1925	1	1		Seifhennersdorf	Lower Oligocene	Betulaceae	Carpinus	Carpinus_grandis	deciduous	tree	unlobed	dentate	pinnate	non-looped	F	F	F	no	no	no	no	no	no	no
SNSD, MMG_PB	Sf._1929	1			Seifhennersdorf	Lower Oligocene	Betulaceae	Carpinus	Carpinus_grandis	deciduous	tree	unlobed	dentate	pinnate	non-looped	F	F	F	no	no	no	no	no	no	no
SNSD, MMG_PB	Sf._1930	1	1		Seifhennersdorf	Lower Oligocene	Betulaceae	Carpinus	Carpinus_grandis	deciduous	tree	unlobed	dentate	pinnate	non-looped	F	F	F	no	no	no	no	no	no	no
SNSD, MMG_PB	Sf._1931	1			Seifhennersdorf	Lower Oligocene	Betulaceae	Carpinus	Carpinus_grandis	deciduous	tree	unlobed	dentate	pinnate	non-looped	F	F	F	no	no	no	no	no	no	no
SNSD, MMG_PB	Sf._1932	1	1		Seifhennersdorf	Lower Oligocene	Betulaceae	Carpinus	Carpinus_grandis	deciduous	tree	unlobed	dentate	pinnate	non-looped	F	F	F	no	no	no	no	no	no	no
SNSD, MMG_PB	Sf._1933	1			Seifhennersdorf	Lower Oligocene	Betulaceae	Carpinus	Carpinus_grandis	deciduous	tree	unlobed	dentate	pinnate	non-looped	F	F	F	no	no	no	no	no	no	no
SNSD, MMG_PB	Sf._1934	1			Seifhennersdorf	Lower Oligocene	Betulaceae	Carpinus	Carpinus_grandis	deciduous	tree	unlobed	dentate	pinnate	non-looped	F	F	F	no	no	no	no	no	no	no
SNSD, MMG_PB	Sf._1937	1			Seifhennersdorf	Lower Oligocene	Betulaceae	Carpinus	Carpinus_grandis	deciduous	tree	unlobed	dentate	pinnate	non-looped	F	F	F	yes	yes	no	no	no	no	no	2
SNSD, MMG_PB	Sf._1938	1			Seifhennersdorf	Lower Oligocene	Betulaceae	Carpinus	Carpinus_grandis	deciduous	tree	unlobed	dentate	pinnate	non-looped	F	F	F	no	no	no	no	no	no	no
SNSD, MMG_PB	Sf._1939	1			Seifhennersdorf	Lower Oligocene	Betulaceae	Carpinus	Carpinus_grandis	deciduous	tree	unlobed	dentate	pinnate	non-looped	F	F	F	no	no	no	no	no	no	no
SNSD, MMG_PB	Sf._1940	1	1		Seifhennersdorf	Lower Oligocene	Betulaceae	Carpinus	Carpinus_grandis	deciduous	tree	unlobed	dentate	pinnate	non-looped	F	F	F	no	no	no	no	no	no	no
SNSD, MMG_PB	Sf._1942	1	1		Seifhennersdorf	Lower Oligocene	Betulaceae	Carpinus	Carpinus_grandis	deciduous	tree	unlobed	dentate	pinnate	non-looped	F	F	F	no	no	no	no	no	no	no
SNSD, MMG_PB	Sf._1944	1			Seifhennersdorf	Lower Oligocene	Betulaceae	Carpinus	Carpinus_grandis	deciduous	tree	unlobed	dentate	pinnate	non-looped	F	F	F	no	no	no	no	no	no	no
SNSD, MMG_PB	Sf._1945	1			Seifhennersdorf	Lower Oligocene	Betulaceae	Carpinus	Carpinus_grandis	deciduous	tree	unlobed	dentate	pinnate	non-looped	F	F	F	no	no	no	no	no	no	no
SNSD, MMG_PB	Sf._1946	1	1	1	Seifhennersdorf	Lower Oligocene	Betulaceae	Carpinus	Carpinus_grandis	deciduous	tree	unlobed	dentate	pinnate	non-looped	F	F	F	no	no	no	no	no	no	no
SNSD, MMG_PB	Sf._1947	1			Seifhennersdorf	Lower Oligocene	Betulaceae	Carpinus	Carpinus_grandis	deciduous	tree	unlobed	dentate	pinnate	non-looped	F	F	F	no	no	no	no	no	no	no
SNSD, MMG_PB	Sf._1948	1			Seifhennersdorf	Lower Oligocene	Betulaceae	Carpinus	Carpinus_grandis	deciduous	tree	unlobed	dentate	pinnate	non-looped	F	F	F	no	no	no	no	no	no	no
SNSD, MMG_PB	Sf._1949	1	1		Seifhennersdorf	Lower Oligocene	Betulaceae	Carpinus	Carpinus_grandis	deciduous	tree	unlobed	dentate	pinnate	non-looped	F	F	F	no	no	no	no	no	no	no
SNSD, MMG_PB	Sf._1952	1	1		Seifhennersdorf	Lower Oligocene	Betulaceae	Carpinus	Carpinus_grandis	deciduous	tree	unlobed	dentate	pinnate	non-looped	F	F	F	no	no	no	no	no	no	no
SNSD, MMG_PB	Sf._1953	1			Seifhennersdorf	Lower Oligocene	Betulaceae	Carpinus	Carpinus_grandis	deciduous	tree	unlobed	dentate	pinnate	non-looped	F	F	F	no	no	no	no	no	no	no
SNSD, MMG_PB	Sf._1955	1	1		Seifhennersdorf	Lower Oligocene	Betulaceae	Carpinus	Carpinus_grandis	deciduous	tree	unlobed	dentate	pinnate	non-looped	F	F	F	no	no	no	no	no	no	no
SNSD, MMG_PB	Sf._1956	1			Seifhennersdorf	Lower Oligocene	Betulaceae	Carpinus	Carpinus_grandis	deciduous	tree	unlobed	dentate	pinnate	non-looped	F	F	F	no	no	no	no	no	no	no
SNSD, MMG_PB	Sf._1957	1			Seifhennersdorf	Lower Oligocene	Betulaceae	Carpinus	Carpinus_grandis	deciduous	tree	unlobed	dentate	pinnate	non-looped	F	F	F	no	no	no	no	no	no	no
SNSD, MMG_PB	Sf._1958	1			Seifhennersdorf	Lower Oligocene	Betulaceae	Carpinus	Carpinus_grandis	deciduous	tree	unlobed	dentate	pinnate	non-looped	F	F	F	no	no	no	no	no	no	no
SNSD, MMG_PB	Sf._1959	1			Seifhennersdorf	Lower Oligocene	Betulaceae	Carpinus	Carpinus_grandis	deciduous	tree	unlobed	dentate	pinnate	non-looped	F	F	F	yes	yes	no	no	no	no	no	3
SNSD, MMG_PB	Sf._1960	1	1		Seifhennersdorf	Lower Oligocene	Betulaceae	Carpinus	Carpinus_grandis	deciduous	tree	unlobed	dentate	pinnate	non-looped	F	F	F	no	no	no	no	no	no	no
SNSD, MMG_PB	Sf._1961	1			Seifhennersdorf	Lower Oligocene	Betulaceae	Carpinus	Carpinus_grandis	deciduous	tree	unlobed	dentate	pinnate	non-looped	F	F	F	no	no	no	no	no	no	no
SNSD, MMG_PB	Sf._1962	1			Seifhennersdorf	Lower Oligocene	Betulaceae	Carpinus	Carpinus_grandis	deciduous	tree	unlobed	dentate	pinnate	non-looped	F	F	F	no	no	no	no	no	no	no
SNSD, MMG_PB	Sf._1966	1			Seifhennersdorf	Lower Oligocene	Betulaceae	Carpinus	Carpinus_grandis	deciduous	tree	unlobed	dentate	pinnate	non-looped	F	F	F	no	no	no	no	no	no	no
SNSD, MMG_PB	Sf._1968	1			Seifhennersdorf	Lower Oligocene	Betulaceae	Carpinus	Carpinus_grandis	deciduous	tree	unlobed	dentate	pinnate	non-looped	F	F	F	no	no	no	no	no	no	no
SNSD, MMG_PB	Sf._1969	1	1		Seifhennersdorf	Lower Oligocene	Betulaceae	Carpinus	Carpinus_grandis	deciduous	tree	unlobed	dentate	pinnate	non-looped	F	F	F	no	no	no	no	no	no	no
SNSD, MMG_PB	Sf._1974:1,2	1			Seifhennersdorf	Lower Oligocene	Betulaceae	Carpinus	Carpinus_grandis	deciduous	tree	unlobed	dentate	pinnate	non-looped	F	F	F	yes	yes	no	no	no	no	no	2
SNSD, MMG_PB	Sf._1975	1			Seifhennersdorf	Lower Oligocene	Betulaceae	Carpinus	Carpinus_grandis	deciduous	tree	unlobed	dentate	pinnate	non-looped	F	F	F	no	no	no	no	no	no	no
SNSD, MMG_PB	Sf._1977	1	1		Seifhennersdorf	Lower Oligocene	Betulaceae	Carpinus	Carpinus_grandis	deciduous	tree	unlobed	dentate	pinnate	non-looped	F	F	F	no	no	no	no	no	no	no
SNSD, MMG_PB	Sf._1978	1	1		Seifhennersdorf	Lower Oligocene	Betulaceae	Carpinus	Carpinus_grandis	deciduous	tree	unlobed	dentate	pinnate	non-looped	F	F	F	no	no	no	no	no	no	no
SNSD, MMG_PB	Sf._1979	1			Seifhennersdorf	Lower Oligocene	Betulaceae	Carpinus	Carpinus_grandis	deciduous	tree	unlobed	dentate	pinnate	non-looped	F	F	F	no	no	no	no	no	no	no
SNSD, MMG_PB	Sf._1980	1	1		Seifhennersdorf	Lower Oligocene	Betulaceae	Carpinus	Carpinus_grandis	deciduous	tree	unlobed	dentate	pinnate	non-looped	F	F	F	no	no	no	no	no	no	no
SNSD, MMG_PB	Sf._1981a	1	1		Seifhennersdorf	Lower Oligocene	Betulaceae	Carpinus	Carpinus_grandis	deciduous	tree	unlobed	dentate	pinnate	non-looped	F	F	F	no	no	no	no	no	no	no
SNSD, MMG_PB	Sf._1981b	1			Seifhennersdorf	Lower Oligocene	Betulaceae	Carpinus	Carpinus_grandis	deciduous	tree	unlobed	dentate	pinnate	non-looped	F	F	F	no	no	no	no	no	no	no
SNSD, MMG_PB	Sf._1982	1	1		Seifhennersdorf	Lower Oligocene	Betulaceae	Carpinus	Carpinus_grandis	deciduous	tree	unlobed	dentate	pinnate	non-looped	F	F	F	no	no	no	no	no	no	no
SNSD, MMG_PB	Sf._1983	1			Seifhennersdorf	Lower Oligocene	Betulaceae	Carpinus	Carpinus_grandis	deciduous	tree	unlobed	dentate	pinnate	non-looped	F	F	F	no	no	no	no	no	no	no
SNSD, MMG_PB	Sf._1984	1			Seifhennersdorf	Lower Oligocene	Betulaceae	Carpinus	Carpinus_grandis	deciduous	tree	unlobed	dentate	pinnate	non-looped	F	F	F	no	no	no	no	no	no	no
SNSD, MMG_PB	Sf._1985	1	1		Seifhennersdorf	Lower Oligocene	Betulaceae	Carpinus	Carpinus_grandis	deciduous	tree	unlobed	dentate	pinnate	non-looped	F	F	F	no	no	no	no	no	no	no
SNSD, MMG_PB	Sf._1986	1			Seifhennersdorf	Lower Oligocene	Betulaceae	Carpinus	Carpinus_grandis	deciduous	tree	unlobed	dentate	pinnate	non-looped	F	F	F	no	no	no	no	no	no	no
SNSD, MMG_PB	Sf._1987	1			Seifhennersdorf	Lower Oligocene	Betulaceae	Carpinus	Carpinus_grandis	deciduous	tree	unlobed	dentate	pinnate	non-looped	F	F	F	no	no	no	no	no	no	no
SNSD, MMG_PB	Sf._1988	1	1		Seifhennersdorf	Lower Oligocene	Betulaceae	Carpinus	Carpinus_grandis	deciduous	tree	unlobed	dentate	pinnate	non-looped	F	F	F	no	no	no	no	no	no	no
SNSD, MMG_PB	Sf._1990	1			Seifhennersdorf	Lower Oligocene	Betulaceae	Carpinus	Carpinus_grandis	deciduous	tree	unlobed	dentate	pinnate	non-looped	F	F	F	no	no	no	no	no	no	no
SNSD, MMG_PB	Sf._1991	1			Seifhennersdorf	Lower Oligocene	Betulaceae	Carpinus	Carpinus_grandis	deciduous	tree	unlobed	dentate	pinnate	non-looped	F	F	F	no	no	no	no	no	no	no
SNSD, MMG_PB	Sf._1992	1			Seifhennersdorf	Lower Oligocene	Betulaceae	Carpinus	Carpinus_grandis	deciduous	tree	unlobed	dentate	pinnate	non-looped	F	F	F	no	no	no	no	no	no	no
SNSD, MMG_PB	Sf._1993	1			Seifhennersdorf	Lower Oligocene	Betulaceae	Carpinus	Carpinus_grandis	deciduous	tree	unlobed	dentate	pinnate	non-looped	F	F	F	no	no	no	no	no	no	no
SNSD, MMG_PB	Sf._1994	1			Seifhennersdorf	Lower Oligocene	Betulaceae	Carpinus	Carpinus_grandis	deciduous	tree	unlobed	dentate	pinnate	non-looped	F	F	F	no	no	no	no	no	no	no
SNSD, MMG_PB	Sf._1996	1			Seifhennersdorf	Lower Oligocene	Betulaceae	Carpinus	Carpinus_grandis	deciduous	tree	unlobed	dentate	pinnate	non-looped	F	F	F	no	no	no	no	no	no	no
SNSD, MMG_PB	Sf._1997	1	1		Seifhennersdorf	Lower Oligocene	Betulaceae	Carpinus	Carpinus_grandis	deciduous	tree	unlobed	dentate	pinnate	non-looped	F	F	F	yes	yes	no	no	no	no	no	2
SNSD, MMG_PB	Sf._1999	1			Seifhennersdorf	Lower Oligocene	Betulaceae	Carpinus	Carpinus_grandis	deciduous	tree	unlobed	dentate	pinnate	non-looped	F	F	F	no	no	no	no	no	no	no
SNSD, MMG_PB	Sf._2001	1	1	1	Seifhennersdorf	Lower Oligocene	Betulaceae	Carpinus	Carpinus_grandis	deciduous	tree	unlobed	dentate	pinnate	non-looped	F	F	F	no	no	no	no	no	no	no
SNSD, MMG_PB	Sf._2002:1,2	1			Seifhennersdorf	Lower Oligocene	Betulaceae	Carpinus	Carpinus_grandis	deciduous	tree	unlobed	dentate	pinnate	non-looped	F	F	F	no	no	no	no	no	no	no
SNSD, MMG_PB	Sf._2003	1	1		Seifhennersdorf	Lower Oligocene	Betulaceae	Carpinus	Carpinus_grandis	deciduous	tree	unlobed	dentate	pinnate	non-looped	F	F	F	yes	no	yes	no	no	no	no	81
SNSD, MMG_PB	Sf._2004	1			Seifhennersdorf	Lower Oligocene	Betulaceae	Carpinus	Carpinus_grandis	deciduous	tree	unlobed	dentate	pinnate	non-looped	F	F	F	no	no	no	no	no	no	no
SNSD, MMG_PB	Sf._2005	1			Seifhennersdorf	Lower Oligocene	Betulaceae	Carpinus	Carpinus_grandis	deciduous	tree	unlobed	dentate	pinnate	non-looped	F	F	F	no	no	no	no	no	no	no
SNSD, MMG_PB	Sf._2006b	1			Seifhennersdorf	Lower Oligocene	Betulaceae	Carpinus	Carpinus_grandis	deciduous	tree	unlobed	dentate	pinnate	non-looped	F	F	F	no	no	no	no	no	no	no
SNSD, MMG_PB	Sf._2007	1			Seifhennersdorf	Lower Oligocene	Betulaceae	Carpinus	Carpinus_grandis	deciduous	tree	unlobed	dentate	pinnate	non-looped	F	F	F	no	no	no	no	no	no	no
SNSD, MMG_PB	Sf._2008:1,2a	1	1		Seifhennersdorf	Lower Oligocene	Betulaceae	Carpinus	Carpinus_grandis	deciduous	tree	unlobed	dentate	pinnate	non-looped	F	F	F	no	no	no	no	no	no	no
SNSD, MMG_PB	Sf._2010:1,2	1			Seifhennersdorf	Lower Oligocene	Betulaceae	Carpinus	Carpinus_grandis	deciduous	tree	unlobed	dentate	pinnate	non-looped	F	F	F	no	no	no	no	no	no	no
SNSD, MMG_PB	Sf._2012:1,2	1			Seifhennersdorf	Lower Oligocene	Betulaceae	Carpinus	Carpinus_grandis	deciduous	tree	unlobed	dentate	pinnate	non-looped	F	F	F	no	no	no	no	no	no	no
SNSD, MMG_PB	Sf._2013:1,2	1			Seifhennersdorf	Lower Oligocene	Betulaceae	Carpinus	Carpinus_grandis	deciduous	tree	unlobed	dentate	pinnate	non-looped	F	F	F	no	no	no	no	no	no	no
SNSD, MMG_PB	Sf._2014	1	1		Seifhennersdorf	Lower Oligocene	Betulaceae	Carpinus	Carpinus_grandis	deciduous	tree	unlobed	dentate	pinnate	non-looped	F	F	F	no	no	no	no	no	no	no
SNSD, MMG_PB	Sf._2016	1	1	1	Seifhennersdorf	Lower Oligocene	Betulaceae	Carpinus	Carpinus_grandis	deciduous	tree	unlobed	dentate	pinnate	non-looped	F	F	F	yes	no	yes	no	no	no	no	14
SNSD, MMG_PB	Sf._2017:1,2	1			Seifhennersdorf	Lower Oligocene	Betulaceae	Carpinus	Carpinus_grandis	deciduous	tree	unlobed	dentate	pinnate	non-looped	F	F	F	no	no	no	no	no	no	no
SNSD, MMG_PB	Sf._2019	1	1		Seifhennersdorf	Lower Oligocene	Betulaceae	Carpinus	Carpinus_grandis	deciduous	tree	unlobed	dentate	pinnate	non-looped	F	F	F	no	no	no	no	no	no	no
SNSD, MMG_PB	Sf._2021:1,2	1			Seifhennersdorf	Lower Oligocene	Betulaceae	Carpinus	Carpinus_grandis	deciduous	tree	unlobed	dentate	pinnate	non-looped	F	F	F	no	no	no	no	no	no	no
SNSD, MMG_PB	Sf._2022	1			Seifhennersdorf	Lower Oligocene	Betulaceae	Carpinus	Carpinus_grandis	deciduous	tree	unlobed	dentate	pinnate	non-looped	F	F	F	no	no	no	no	no	no	no
SNSD, MMG_PB	Sf._2025	1			Seifhennersdorf	Lower Oligocene	Betulaceae	Carpinus	Carpinus_grandis	deciduous	tree	unlobed	dentate	pinnate	non-looped	F	F	F	no	no	no	no	no	no	no
SNSD, MMG_PB	Sf._2026	1			Seifhennersdorf	Lower Oligocene	Betulaceae	Carpinus	Carpinus_grandis	deciduous	tree	unlobed	dentate	pinnate	non-looped	F	F	F	no	no	no	no	no	no	no
SNSD, MMG_PB	Sf._2027	1	1		Seifhennersdorf	Lower Oligocene	Betulaceae	Carpinus	Carpinus_grandis	deciduous	tree	unlobed	dentate	pinnate	non-looped	F	F	F	no	no	no	no	no	no	no
SNSD, MMG_PB	Sf._2030	1			Seifhennersdorf	Lower Oligocene	Betulaceae	Carpinus	Carpinus_grandis	deciduous	tree	unlobed	dentate	pinnate	non-looped	F	F	F	no	no	no	no	no	no	no
SNSD, MMG_PB	Sf._2031	1			Seifhennersdorf	Lower Oligocene	Betulaceae	Carpinus	Carpinus_grandis	deciduous	tree	unlobed	dentate	pinnate	non-looped	F	F	F	no	no	no	no	no	no	no
SNSD, MMG_PB	Sf._2032	1			Seifhennersdorf	Lower Oligocene	Betulaceae	Carpinus	Carpinus_grandis	deciduous	tree	unlobed	dentate	pinnate	non-looped	F	F	F	no	no	no	no	no	no	no
SNSD, MMG_PB	Sf._2033	1	1	1	Seifhennersdorf	Lower Oligocene	Betulaceae	Carpinus	Carpinus_grandis	deciduous	tree	unlobed	dentate	pinnate	non-looped	F	F	F	no	no	no	no	no	no	no
SNSD, MMG_PB	Sf._2035	1			Seifhennersdorf	Lower Oligocene	Betulaceae	Carpinus	Carpinus_grandis	deciduous	tree	unlobed	dentate	pinnate	non-looped	F	F	F	no	no	no	no	no	no	no
SNSD, MMG_PB	Sf._2036	1			Seifhennersdorf	Lower Oligocene	Betulaceae	Carpinus	Carpinus_grandis	deciduous	tree	unlobed	dentate	pinnate	non-looped	F	F	F	no	no	no	no	no	no	no
SNSD, MMG_PB	Sf._2037	1			Seifhennersdorf	Lower Oligocene	Betulaceae	Carpinus	Carpinus_grandis	deciduous	tree	unlobed	dentate	pinnate	non-looped	F	F	F	no	no	no	no	no	no	no
SNSD, MMG_PB	Sf._2038:1,2	1	1		Seifhennersdorf	Lower Oligocene	Betulaceae	Carpinus	Carpinus_grandis	deciduous	tree	unlobed	dentate	pinnate	non-looped	F	F	F	no	no	no	no	no	no	no
SNSD, MMG_PB	Sf._2039	1	1		Seifhennersdorf	Lower Oligocene	Betulaceae	Carpinus	Carpinus_grandis	deciduous	tree	unlobed	dentate	pinnate	non-looped	F	F	F	no	no	no	no	no	no	no
SNSD, MMG_PB	Sf._2040	1			Seifhennersdorf	Lower Oligocene	Betulaceae	Carpinus	Carpinus_grandis	deciduous	tree	unlobed	dentate	pinnate	non-looped	F	F	F	no	no	no	no	no	no	no
SNSD, MMG_PB	Sf._2041	1	1		Seifhennersdorf	Lower Oligocene	Betulaceae	Carpinus	Carpinus_grandis	deciduous	tree	unlobed	dentate	pinnate	non-looped	F	F	F	no	no	no	no	no	no	no
SNSD, MMG_PB	Sf._2043	1			Seifhennersdorf	Lower Oligocene	Betulaceae	Carpinus	Carpinus_grandis	deciduous	tree	unlobed	dentate	pinnate	non-looped	F	F	F	no	no	no	no	no	no	no
SNSD, MMG_PB	Sf._2044	1			Seifhennersdorf	Lower Oligocene	Betulaceae	Carpinus	Carpinus_grandis	deciduous	tree	unlobed	dentate	pinnate	non-looped	F	F	F	no	no	no	no	no	no	no
SNSD, MMG_PB	Sf._2046	1			Seifhennersdorf	Lower Oligocene	Betulaceae	Carpinus	Carpinus_grandis	deciduous	tree	unlobed	dentate	pinnate	non-looped	F	F	F	no	no	no	no	no	no	no
SNSD, MMG_PB	Sf._2047	1			Seifhennersdorf	Lower Oligocene	Betulaceae	Carpinus	Carpinus_grandis	deciduous	tree	unlobed	dentate	pinnate	non-looped	F	F	F	no	no	no	no	no	no	no
SNSD, MMG_PB	Sf._2048	1	1		Seifhennersdorf	Lower Oligocene	Betulaceae	Carpinus	Carpinus_grandis	deciduous	tree	unlobed	dentate	pinnate	non-looped	F	F	F	no	no	no	no	no	no	no
SNSD, MMG_PB	Sf._2049	1			Seifhennersdorf	Lower Oligocene	Betulaceae	Carpinus	Carpinus_grandis	deciduous	tree	unlobed	dentate	pinnate	non-looped	F	F	F	no	no	no	no	no	no	no
SNSD, MMG_PB	Sf._2050	1			Seifhennersdorf	Lower Oligocene	Betulaceae	Carpinus	Carpinus_grandis	deciduous	tree	unlobed	dentate	pinnate	non-looped	F	F	F	no	no	no	no	no	no	no
SNSD, MMG_PB	Sf._2051:1,2	1			Seifhennersdorf	Lower Oligocene	Betulaceae	Carpinus	Carpinus_grandis	deciduous	tree	unlobed	dentate	pinnate	non-looped	F	F	F	no	no	no	no	no	no	no
SNSD, MMG_PB	Sf._2052a	1			Seifhennersdorf	Lower Oligocene	Betulaceae	Carpinus	Carpinus_grandis	deciduous	tree	unlobed	dentate	pinnate	non-looped	F	F	F	no	no	no	no	no	no	no
SNSD, MMG_PB	Sf._2054	1	1		Seifhennersdorf	Lower Oligocene	Betulaceae	Carpinus	Carpinus_grandis	deciduous	tree	unlobed	dentate	pinnate	non-looped	F	F	F	no	no	no	no	no	no	no
SNSD, MMG_PB	Sf._2055	1	1		Seifhennersdorf	Lower Oligocene	Betulaceae	Carpinus	Carpinus_grandis	deciduous	tree	unlobed	dentate	pinnate	non-looped	F	F	F	no	no	no	no	no	no	no
SNSD, MMG_PB	Sf._2057	1	1		Seifhennersdorf	Lower Oligocene	Betulaceae	Carpinus	Carpinus_grandis	deciduous	tree	unlobed	dentate	pinnate	non-looped	F	F	F	no	no	no	no	no	no	no
SNSD, MMG_PB	Sf._2058	1			Seifhennersdorf	Lower Oligocene	Betulaceae	Carpinus	Carpinus_grandis	deciduous	tree	unlobed	dentate	pinnate	non-looped	F	F	F	no	no	no	no	no	no	no
SNSD, MMG_PB	Sf._2061:1,2	1	1		Seifhennersdorf	Lower Oligocene	Betulaceae	Carpinus	Carpinus_grandis	deciduous	tree	unlobed	dentate	pinnate	non-looped	F	F	F	no	no	no	no	no	no	no
SNSD, MMG_PB	Sf._2063	1			Seifhennersdorf	Lower Oligocene	Betulaceae	Carpinus	Carpinus_grandis	deciduous	tree	unlobed	dentate	pinnate	non-looped	F	F	F	no	no	no	no	no	no	no
SNSD, MMG_PB	Sf._2064	1			Seifhennersdorf	Lower Oligocene	Betulaceae	Carpinus	Carpinus_grandis	deciduous	tree	unlobed	dentate	pinnate	non-looped	F	F	F	no	no	no	no	no	no	no
SNSD, MMG_PB	Sf._2067	1			Seifhennersdorf	Lower Oligocene	Betulaceae	Carpinus	Carpinus_grandis	deciduous	tree	unlobed	dentate	pinnate	non-looped	F	F	F	no	no	no	no	no	no	no
SNSD, MMG_PB	Sf._2069:1,2	1			Seifhennersdorf	Lower Oligocene	Betulaceae	Carpinus	Carpinus_grandis	deciduous	tree	unlobed	dentate	pinnate	non-looped	F	F	F	no	no	no	no	no	no	no
SNSD, MMG_PB	Sf._2070	1			Seifhennersdorf	Lower Oligocene	Betulaceae	Carpinus	Carpinus_grandis	deciduous	tree	unlobed	dentate	pinnate	non-looped	F	F	F	no	no	no	no	no	no	no
SNSD, MMG_PB	Sf._2071	1			Seifhennersdorf	Lower Oligocene	Betulaceae	Carpinus	Carpinus_grandis	deciduous	tree	unlobed	dentate	pinnate	non-looped	F	F	F	no	no	no	no	no	no	no
SNSD, MMG_PB	Sf._2072	1	1		Seifhennersdorf	Lower Oligocene	Betulaceae	Carpinus	Carpinus_grandis	deciduous	tree	unlobed	dentate	pinnate	non-looped	F	F	F	no	no	no	no	no	no	no
SNSD, MMG_PB	Sf._2073:1,2	1			Seifhennersdorf	Lower Oligocene	Betulaceae	Carpinus	Carpinus_grandis	deciduous	tree	unlobed	dentate	pinnate	non-looped	F	F	F	no	no	no	no	no	no	no
SNSD, MMG_PB	Sf._2074	1			Seifhennersdorf	Lower Oligocene	Betulaceae	Carpinus	Carpinus_grandis	deciduous	tree	unlobed	dentate	pinnate	non-looped	F	F	F	no	no	no	no	no	no	no
SNSD, MMG_PB	Sf._2075	1	1		Seifhennersdorf	Lower Oligocene	Betulaceae	Carpinus	Carpinus_grandis	deciduous	tree	unlobed	dentate	pinnate	non-looped	F	F	F	no	no	no	no	no	no	no
SNSD, MMG_PB	Sf._2076	1	1		Seifhennersdorf	Lower Oligocene	Betulaceae	Carpinus	Carpinus_grandis	deciduous	tree	unlobed	dentate	pinnate	non-looped	F	F	F	no	no	no	no	no	no	no
SNSD, MMG_PB	Sf._2078:1,2	1			Seifhennersdorf	Lower Oligocene	Betulaceae	Carpinus	Carpinus_grandis	deciduous	tree	unlobed	dentate	pinnate	non-looped	F	F	F	yes	yes	no	no	no	no	no	5
SNSD, MMG_PB	Sf._2079	1			Seifhennersdorf	Lower Oligocene	Betulaceae	Carpinus	Carpinus_grandis	deciduous	tree	unlobed	dentate	pinnate	non-looped	F	F	F	no	no	no	no	no	no	no
SNSD, MMG_PB	Sf._2080	1			Seifhennersdorf	Lower Oligocene	Betulaceae	Carpinus	Carpinus_grandis	deciduous	tree	unlobed	dentate	pinnate	non-looped	F	F	F	yes	yes	no	no	no	no	no	78
SNSD, MMG_PB	Sf._2081:1,2	1			Seifhennersdorf	Lower Oligocene	Betulaceae	Carpinus	Carpinus_grandis	deciduous	tree	unlobed	dentate	pinnate	non-looped	F	F	F	no	no	no	no	no	no	no
SNSD, MMG_PB	Sf._2084:1,2	1			Seifhennersdorf	Lower Oligocene	Betulaceae	Carpinus	Carpinus_grandis	deciduous	tree	unlobed	dentate	pinnate	non-looped	F	F	F	no	no	no	no	no	no	no
SNSD, MMG_PB	Sf._2085:1,2	1			Seifhennersdorf	Lower Oligocene	Betulaceae	Carpinus	Carpinus_grandis	deciduous	tree	unlobed	dentate	pinnate	non-looped	F	F	F	no	no	no	no	no	no	no
SNSD, MMG_PB	Sf._2086:1,2	1			Seifhennersdorf	Lower Oligocene	Betulaceae	Carpinus	Carpinus_grandis	deciduous	tree	unlobed	dentate	pinnate	non-looped	F	F	F	no	no	no	no	no	no	no
SNSD, MMG_PB	Sf._2089	1	1		Seifhennersdorf	Lower Oligocene	Betulaceae	Carpinus	Carpinus_grandis	deciduous	tree	unlobed	dentate	pinnate	non-looped	F	F	F	no	no	no	no	no	no	no
SNSD, MMG_PB	Sf._2090:1,2	1			Seifhennersdorf	Lower Oligocene	Betulaceae	Carpinus	Carpinus_grandis	deciduous	tree	unlobed	dentate	pinnate	non-looped	F	F	F	no	no	no	no	no	no	no
SNSD, MMG_PB	Sf._2092	1			Seifhennersdorf	Lower Oligocene	Betulaceae	Carpinus	Carpinus_grandis	deciduous	tree	unlobed	dentate	pinnate	non-looped	F	F	F	no	no	no	no	no	no	no
SNSD, MMG_PB	Sf._2093:1,2	1			Seifhennersdorf	Lower Oligocene	Betulaceae	Carpinus	Carpinus_grandis	deciduous	tree	unlobed	dentate	pinnate	non-looped	F	F	F	no	no	no	no	no	no	no
SNSD, MMG_PB	Sf._2094	1			Seifhennersdorf	Lower Oligocene	Betulaceae	Carpinus	Carpinus_grandis	deciduous	tree	unlobed	dentate	pinnate	non-looped	F	F	F	no	no	no	no	no	no	no
SNSD, MMG_PB	Sf._2095	1			Seifhennersdorf	Lower Oligocene	Betulaceae	Carpinus	Carpinus_grandis	deciduous	tree	unlobed	dentate	pinnate	non-looped	F	F	F	no	no	no	no	no	no	no
SNSD, MMG_PB	Sf._2096	1			Seifhennersdorf	Lower Oligocene	Betulaceae	Carpinus	Carpinus_grandis	deciduous	tree	unlobed	dentate	pinnate	non-looped	F	F	F	no	no	no	no	no	no	no
SNSD, MMG_PB	Sf._2100	1	1		Seifhennersdorf	Lower Oligocene	Betulaceae	Carpinus	Carpinus_grandis	deciduous	tree	unlobed	dentate	pinnate	non-looped	F	F	F	no	no	no	no	no	no	no
SNSD, MMG_PB	Sf._2101	1	1		Seifhennersdorf	Lower Oligocene	Betulaceae	Carpinus	Carpinus_grandis	deciduous	tree	unlobed	dentate	pinnate	non-looped	F	F	F	no	no	no	no	no	no	no
SNSD, MMG_PB	Sf._2102	1			Seifhennersdorf	Lower Oligocene	Betulaceae	Carpinus	Carpinus_grandis	deciduous	tree	unlobed	dentate	pinnate	non-looped	F	F	F	no	no	no	no	no	no	no
SNSD, MMG_PB	Sf._2103	1			Seifhennersdorf	Lower Oligocene	Betulaceae	Carpinus	Carpinus_grandis	deciduous	tree	unlobed	dentate	pinnate	non-looped	F	F	F	no	no	no	no	no	no	no
SNSD, MMG_PB	Sf._2104	1	1		Seifhennersdorf	Lower Oligocene	Betulaceae	Carpinus	Carpinus_grandis	deciduous	tree	unlobed	dentate	pinnate	non-looped	F	F	F	no	no	no	no	no	no	no
SNSD, MMG_PB	Sf._2105	1			Seifhennersdorf	Lower Oligocene	Betulaceae	Carpinus	Carpinus_grandis	deciduous	tree	unlobed	dentate	pinnate	non-looped	F	F	F	no	no	no	no	no	no	no
SNSD, MMG_PB	Sf._2107	1			Seifhennersdorf	Lower Oligocene	Betulaceae	Carpinus	Carpinus_grandis	deciduous	tree	unlobed	dentate	pinnate	non-looped	F	F	F	no	no	no	no	no	no	no
SNSD, MMG_PB	Sf._2109	1			Seifhennersdorf	Lower Oligocene	Betulaceae	Carpinus	Carpinus_grandis	deciduous	tree	unlobed	dentate	pinnate	non-looped	F	F	F	no	no	no	no	no	no	no
SNSD, MMG_PB	Sf._2110	1	1		Seifhennersdorf	Lower Oligocene	Betulaceae	Carpinus	Carpinus_grandis	deciduous	tree	unlobed	dentate	pinnate	non-looped	F	F	F	no	no	no	no	no	no	no
SNSD, MMG_PB	Sf._2113	1	1		Seifhennersdorf	Lower Oligocene	Betulaceae	Carpinus	Carpinus_grandis	deciduous	tree	unlobed	dentate	pinnate	non-looped	F	F	F	no	no	no	no	no	no	no
SNSD, MMG_PB	Sf._2114	1	1		Seifhennersdorf	Lower Oligocene	Betulaceae	Carpinus	Carpinus_grandis	deciduous	tree	unlobed	dentate	pinnate	non-looped	F	F	F	no	no	no	no	no	no	no
SNSD, MMG_PB	Sf._2115	1			Seifhennersdorf	Lower Oligocene	Betulaceae	Carpinus	Carpinus_grandis	deciduous	tree	unlobed	dentate	pinnate	non-looped	F	F	F	no	no	no	no	no	no	no
SNSD, MMG_PB	Sf._2116	1			Seifhennersdorf	Lower Oligocene	Betulaceae	Carpinus	Carpinus_grandis	deciduous	tree	unlobed	dentate	pinnate	non-looped	F	F	F	no	no	no	no	no	no	no
SNSD, MMG_PB	Sf._2117	1			Seifhennersdorf	Lower Oligocene	Betulaceae	Carpinus	Carpinus_grandis	deciduous	tree	unlobed	dentate	pinnate	non-looped	F	F	F	no	no	no	no	no	no	no
SNSD, MMG_PB	Sf._2118	1			Seifhennersdorf	Lower Oligocene	Betulaceae	Carpinus	Carpinus_grandis	deciduous	tree	unlobed	dentate	pinnate	non-looped	F	F	F	no	no	no	no	no	no	no
SNSD, MMG_PB	Sf._2119	1			Seifhennersdorf	Lower Oligocene	Betulaceae	Carpinus	Carpinus_grandis	deciduous	tree	unlobed	dentate	pinnate	non-looped	F	F	F	no	no	no	no	no	no	no
SNSD, MMG_PB	Sf._2120	1			Seifhennersdorf	Lower Oligocene	Betulaceae	Carpinus	Carpinus_grandis	deciduous	tree	unlobed	dentate	pinnate	non-looped	F	F	F	no	no	no	no	no	no	no
SNSD, MMG_PB	Sf._2122	1			Seifhennersdorf	Lower Oligocene	Betulaceae	Carpinus	Carpinus_grandis	deciduous	tree	unlobed	dentate	pinnate	non-looped	F	F	F	no	no	no	no	no	no	no
SNSD, MMG_PB	Sf._2123	1			Seifhennersdorf	Lower Oligocene	Betulaceae	Carpinus	Carpinus_grandis	deciduous	tree	unlobed	dentate	pinnate	non-looped	F	F	F	no	no	no	no	no	no	no
SNSD, MMG_PB	Sf._2129	1			Seifhennersdorf	Lower Oligocene	Betulaceae	Carpinus	Carpinus_grandis	deciduous	tree	unlobed	dentate	pinnate	non-looped	F	F	F	no	no	no	no	no	no	no
SNSD, MMG_PB	Sf._2130	1			Seifhennersdorf	Lower Oligocene	Betulaceae	Carpinus	Carpinus_grandis	deciduous	tree	unlobed	dentate	pinnate	non-looped	F	F	F	no	no	no	no	no	no	no
SNSD, MMG_PB	Sf._2133	1	1	1	Seifhennersdorf	Lower Oligocene	Betulaceae	Carpinus	Carpinus_grandis	deciduous	tree	unlobed	dentate	pinnate	non-looped	F	F	F	no	no	no	no	no	no	no
SNSD, MMG_PB	Sf._2134	1			Seifhennersdorf	Lower Oligocene	Betulaceae	Carpinus	Carpinus_grandis	deciduous	tree	unlobed	dentate	pinnate	non-looped	F	F	F	no	no	no	no	no	no	no
SNSD, MMG_PB	Sf._2135	1			Seifhennersdorf	Lower Oligocene	Betulaceae	Carpinus	Carpinus_grandis	deciduous	tree	unlobed	dentate	pinnate	non-looped	F	F	F	no	no	no	no	no	no	no
SNSD, MMG_PB	Sf._2137	1	1		Seifhennersdorf	Lower Oligocene	Betulaceae	Carpinus	Carpinus_grandis	deciduous	tree	unlobed	dentate	pinnate	non-looped	F	F	F	no	no	no	no	no	no	no
SNSD, MMG_PB	Sf._2138	1			Seifhennersdorf	Lower Oligocene	Betulaceae	Carpinus	Carpinus_grandis	deciduous	tree	unlobed	dentate	pinnate	non-looped	F	F	F	no	no	no	no	no	no	no
SNSD, MMG_PB	Sf._2139	1	1		Seifhennersdorf	Lower Oligocene	Betulaceae	Carpinus	Carpinus_grandis	deciduous	tree	unlobed	dentate	pinnate	non-looped	F	F	F	no	no	no	no	no	no	no
SNSD, MMG_PB	Sf._2142	1			Seifhennersdorf	Lower Oligocene	Betulaceae	Carpinus	Carpinus_grandis	deciduous	tree	unlobed	dentate	pinnate	non-looped	F	F	F	no	no	no	no	no	no	no
SNSD, MMG_PB	Sf._2143	1			Seifhennersdorf	Lower Oligocene	Betulaceae	Carpinus	Carpinus_grandis	deciduous	tree	unlobed	dentate	pinnate	non-looped	F	F	F	no	no	no	no	no	no	no
SNSD, MMG_PB	Sf._2144	1	1	1	Seifhennersdorf	Lower Oligocene	Betulaceae	Carpinus	Carpinus_grandis	deciduous	tree	unlobed	dentate	pinnate	non-looped	F	F	F	no	no	no	no	no	no	no
SNSD, MMG_PB	Sf._2145	1	1		Seifhennersdorf	Lower Oligocene	Betulaceae	Carpinus	Carpinus_grandis	deciduous	tree	unlobed	dentate	pinnate	non-looped	F	F	F	no	no	no	no	no	no	no
SNSD, MMG_PB	Sf._2146	1	1		Seifhennersdorf	Lower Oligocene	Betulaceae	Carpinus	Carpinus_grandis	deciduous	tree	unlobed	dentate	pinnate	non-looped	F	F	F	no	no	no	no	no	no	no
SNSD, MMG_PB	Sf._2147	1	1		Seifhennersdorf	Lower Oligocene	Betulaceae	Carpinus	Carpinus_grandis	deciduous	tree	unlobed	dentate	pinnate	non-looped	F	F	F	no	no	no	no	no	no	no
SNSD, MMG_PB	Sf._2148	1	1		Seifhennersdorf	Lower Oligocene	Betulaceae	Carpinus	Carpinus_grandis	deciduous	tree	unlobed	dentate	pinnate	non-looped	F	F	F	no	no	no	no	no	no	no
SNSD, MMG_PB	Sf._2149	1			Seifhennersdorf	Lower Oligocene	Betulaceae	Carpinus	Carpinus_grandis	deciduous	tree	unlobed	dentate	pinnate	non-looped	F	F	F	no	no	no	no	no	no	no
SNSD, MMG_PB	Sf._2150	1			Seifhennersdorf	Lower Oligocene	Betulaceae	Carpinus	Carpinus_grandis	deciduous	tree	unlobed	dentate	pinnate	non-looped	F	F	F	no	no	no	no	no	no	no
SNSD, MMG_PB	Sf._2152	1			Seifhennersdorf	Lower Oligocene	Betulaceae	Carpinus	Carpinus_grandis	deciduous	tree	unlobed	dentate	pinnate	non-looped	F	F	F	no	no	no	no	no	no	no
SNSD, MMG_PB	Sf._2154	1	1		Seifhennersdorf	Lower Oligocene	Betulaceae	Carpinus	Carpinus_grandis	deciduous	tree	unlobed	dentate	pinnate	non-looped	F	F	F	no	no	no	no	no	no	no
SNSD, MMG_PB	Sf._2155	1			Seifhennersdorf	Lower Oligocene	Betulaceae	Carpinus	Carpinus_grandis	deciduous	tree	unlobed	dentate	pinnate	non-looped	F	F	F	no	no	no	no	no	no	no
SNSD, MMG_PB	Sf._2157	1			Seifhennersdorf	Lower Oligocene	Betulaceae	Carpinus	Carpinus_grandis	deciduous	tree	unlobed	dentate	pinnate	non-looped	F	F	F	no	no	no	no	no	no	no
SNSD, MMG_PB	Sf._2158	1	1		Seifhennersdorf	Lower Oligocene	Betulaceae	Carpinus	Carpinus_grandis	deciduous	tree	unlobed	dentate	pinnate	non-looped	F	F	F	no	no	no	no	no	no	no
SNSD, MMG_PB	Sf._2159	1			Seifhennersdorf	Lower Oligocene	Betulaceae	Carpinus	Carpinus_grandis	deciduous	tree	unlobed	dentate	pinnate	non-looped	F	F	F	no	no	no	no	no	no	no
SNSD, MMG_PB	Sf._2160	1			Seifhennersdorf	Lower Oligocene	Betulaceae	Carpinus	Carpinus_grandis	deciduous	tree	unlobed	dentate	pinnate	non-looped	F	F	F	no	no	no	no	no	no	no
SNSD, MMG_PB	Sf._2161	1			Seifhennersdorf	Lower Oligocene	Betulaceae	Carpinus	Carpinus_grandis	deciduous	tree	unlobed	dentate	pinnate	non-looped	F	F	F	no	no	no	no	no	no	no
SNSD, MMG_PB	Sf._2163	1			Seifhennersdorf	Lower Oligocene	Betulaceae	Carpinus	Carpinus_grandis	deciduous	tree	unlobed	dentate	pinnate	non-looped	F	F	F	no	no	no	no	no	no	no
SNSD, MMG_PB	Sf._2165	1			Seifhennersdorf	Lower Oligocene	Betulaceae	Carpinus	Carpinus_grandis	deciduous	tree	unlobed	dentate	pinnate	non-looped	F	F	F	no	no	no	no	no	no	no
SNSD, MMG_PB	Sf._2167	1	1		Seifhennersdorf	Lower Oligocene	Betulaceae	Carpinus	Carpinus_grandis	deciduous	tree	unlobed	dentate	pinnate	non-looped	F	F	F	no	no	no	no	no	no	no
SNSD, MMG_PB	Sf._2168	1	1		Seifhennersdorf	Lower Oligocene	Betulaceae	Carpinus	Carpinus_grandis	deciduous	tree	unlobed	dentate	pinnate	non-looped	F	F	F	no	no	no	no	no	no	no
SNSD, MMG_PB	Sf._2170	1			Seifhennersdorf	Lower Oligocene	Betulaceae	Carpinus	Carpinus_grandis	deciduous	tree	unlobed	dentate	pinnate	non-looped	F	F	F	no	no	no	no	no	no	no
SNSD, MMG_PB	Sf._2172	1			Seifhennersdorf	Lower Oligocene	Betulaceae	Carpinus	Carpinus_grandis	deciduous	tree	unlobed	dentate	pinnate	non-looped	F	F	F	no	no	no	no	no	no	no
SNSD, MMG_PB	Sf._2173	1			Seifhennersdorf	Lower Oligocene	Betulaceae	Carpinus	Carpinus_grandis	deciduous	tree	unlobed	dentate	pinnate	non-looped	F	F	F	yes	yes	no	no	no	no	no	2
SNSD, MMG_PB	Sf._2175:1,2	1	1	1	Seifhennersdorf	Lower Oligocene	Betulaceae	Carpinus	Carpinus_grandis	deciduous	tree	unlobed	dentate	pinnate	non-looped	F	F	F	no	no	no	no	no	no	no
SNSD, MMG_PB	Sf._2176	1	1	1	Seifhennersdorf	Lower Oligocene	Betulaceae	Carpinus	Carpinus_grandis	deciduous	tree	unlobed	dentate	pinnate	non-looped	F	F	F	no	no	no	no	no	no	no
SNSD, MMG_PB	Sf._2183	1	1		Seifhennersdorf	Lower Oligocene	Betulaceae	Carpinus	Carpinus_grandis	deciduous	tree	unlobed	dentate	pinnate	non-looped	F	F	F	no	no	no	no	no	no	no
SNSD, MMG_PB	Sf._2185	1			Seifhennersdorf	Lower Oligocene	Betulaceae	Carpinus	Carpinus_grandis	deciduous	tree	unlobed	dentate	pinnate	non-looped	F	F	F	no	no	no	no	no	no	no
SNSD, MMG_PB	Sf._2186	1	1		Seifhennersdorf	Lower Oligocene	Betulaceae	Carpinus	Carpinus_grandis	deciduous	tree	unlobed	dentate	pinnate	non-looped	F	F	F	no	no	no	no	no	no	no
SNSD, MMG_PB	Sf._2253	1			Seifhennersdorf	Lower Oligocene	Betulaceae	Carpinus	Carpinus_grandis	deciduous	tree	unlobed	dentate	pinnate	non-looped	F	F	F	yes	no	no	yes	no	no	no	16
SNSD, MMG_PB	Sf._2707	1			Seifhennersdorf	Lower Oligocene	Betulaceae	Carpinus	Carpinus_grandis	deciduous	tree	unlobed	dentate	pinnate	non-looped	F	F	F	no	no	no	no	no	no	no
SNSD, MMG_PB	Sf._2851	1	1		Seifhennersdorf	Lower Oligocene	Betulaceae	Carpinus	Carpinus_grandis	deciduous	tree	unlobed	dentate	pinnate	non-looped	F	F	F	no	no	no	no	no	no	no
SNSD, MMG_PB	Sf._2893	1	1		Seifhennersdorf	Lower Oligocene	Betulaceae	Carpinus	Carpinus_grandis	deciduous	tree	unlobed	dentate	pinnate	non-looped	F	F	F	no	no	no	no	no	no	no
SNSD, MMG_PB	Sf._2993	1			Seifhennersdorf	Lower Oligocene	Betulaceae	Carpinus	Carpinus_grandis	deciduous	tree	unlobed	dentate	pinnate	non-looped	F	F	F	no	no	no	no	no	no	no
SNSD, MMG_PB	Sf._3276	1			Seifhennersdorf	Lower Oligocene	Betulaceae	Carpinus	Carpinus_grandis	deciduous	tree	unlobed	dentate	pinnate	non-looped	F	F	F	no	no	no	no	no	no	no
SNSD, MMG_PB	Sf._3314	1	1	1	Seifhennersdorf	Lower Oligocene	Betulaceae	Carpinus	Carpinus_grandis	deciduous	tree	unlobed	dentate	pinnate	non-looped	F	F	F	no	no	no	no	no	no	no
SNSD, MMG_PB	Sf._3315,2	1	1	1	Seifhennersdorf	Lower Oligocene	Betulaceae	Carpinus	Carpinus_grandis	deciduous	tree	unlobed	dentate	pinnate	non-looped	F	F	F	no	no	no	no	no	no	no
SNSD, MMG_PB	Sf._3327	1			Seifhennersdorf	Lower Oligocene	Betulaceae	Carpinus	Carpinus_grandis	deciduous	tree	unlobed	dentate	pinnate	non-looped	F	F	F	no	no	no	no	no	no	no
SNSD, MMG_PB	Sf._3341	1			Seifhennersdorf	Lower Oligocene	Betulaceae	Carpinus	Carpinus_grandis	deciduous	tree	unlobed	dentate	pinnate	non-looped	F	F	F	no	no	no	no	no	no	no
SNSD, MMG_PB	Sf._3342	1	1		Seifhennersdorf	Lower Oligocene	Betulaceae	Carpinus	Carpinus_grandis	deciduous	tree	unlobed	dentate	pinnate	non-looped	F	F	F	no	no	no	no	no	no	no
SNSD, MMG_PB	Sf._3355	1	1		Seifhennersdorf	Lower Oligocene	Betulaceae	Carpinus	Carpinus_grandis	deciduous	tree	unlobed	dentate	pinnate	non-looped	F	F	F	no	no	no	no	no	no	no
SNSD, MMG_PB	Sf._3394	1			Seifhennersdorf	Lower Oligocene	Betulaceae	Carpinus	Carpinus_grandis	deciduous	tree	unlobed	dentate	pinnate	non-looped	F	F	F	no	no	no	no	no	no	no
SNSD, MMG_PB	Sf._3395	1			Seifhennersdorf	Lower Oligocene	Betulaceae	Carpinus	Carpinus_grandis	deciduous	tree	unlobed	dentate	pinnate	non-looped	F	F	F	no	no	no	no	no	no	no
SNSD, MMG_PB	Sf._3396	1	1		Seifhennersdorf	Lower Oligocene	Betulaceae	Carpinus	Carpinus_grandis	deciduous	tree	unlobed	dentate	pinnate	non-looped	F	F	F	no	no	no	no	no	no	no
SNSD, MMG_PB	Sf._3397 (I)	1	1		Seifhennersdorf	Lower Oligocene	Betulaceae	Carpinus	Carpinus_grandis	deciduous	tree	unlobed	dentate	pinnate	non-looped	F	F	F	no	no	no	no	no	no	no
SNSD, MMG_PB	Sf._3399	1	1		Seifhennersdorf	Lower Oligocene	Betulaceae	Carpinus	Carpinus_grandis	deciduous	tree	unlobed	dentate	pinnate	non-looped	F	F	F	no	no	no	no	no	no	no
SNSD, MMG_PB	Sf._3400	1			Seifhennersdorf	Lower Oligocene	Betulaceae	Carpinus	Carpinus_grandis	deciduous	tree	unlobed	dentate	pinnate	non-looped	F	F	F	no	no	no	no	no	no	no
SNSD, MMG_PB	Sf._3402:1,2	1			Seifhennersdorf	Lower Oligocene	Betulaceae	Carpinus	Carpinus_grandis	deciduous	tree	unlobed	dentate	pinnate	non-looped	F	F	F	no	no	no	no	no	no	no
SNSD, MMG_PB	Sf._3403:1,2	1			Seifhennersdorf	Lower Oligocene	Betulaceae	Carpinus	Carpinus_grandis	deciduous	tree	unlobed	dentate	pinnate	non-looped	F	F	F	no	no	no	no	no	no	no
SNSD, MMG_PB	Sf._3406:1,2	1	1		Seifhennersdorf	Lower Oligocene	Betulaceae	Carpinus	Carpinus_grandis	deciduous	tree	unlobed	dentate	pinnate	non-looped	F	F	F	no	no	no	no	no	no	no
SNSD, MMG_PB	Sf._3411:1,2	1	1	1	Seifhennersdorf	Lower Oligocene	Betulaceae	Carpinus	Carpinus_grandis	deciduous	tree	unlobed	dentate	pinnate	non-looped	F	F	F	no	no	no	no	no	no	no
SNSD, MMG_PB	Sf._3418:1,2	1	1		Seifhennersdorf	Lower Oligocene	Betulaceae	Carpinus	Carpinus_grandis	deciduous	tree	unlobed	dentate	pinnate	non-looped	F	F	F	no	no	no	no	no	no	no
SNSD, MMG_PB	Sf._3419:1,2	1			Seifhennersdorf	Lower Oligocene	Betulaceae	Carpinus	Carpinus_grandis	deciduous	tree	unlobed	dentate	pinnate	non-looped	F	F	F	no	no	no	no	no	no	no
SNSD, MMG_PB	Sf._3420:1,2	1			Seifhennersdorf	Lower Oligocene	Betulaceae	Carpinus	Carpinus_grandis	deciduous	tree	unlobed	dentate	pinnate	non-looped	F	F	F	no	no	no	no	no	no	no
SNSD, MMG_PB	Sf._3421:1,2	1			Seifhennersdorf	Lower Oligocene	Betulaceae	Carpinus	Carpinus_grandis	deciduous	tree	unlobed	dentate	pinnate	non-looped	F	F	F	no	no	no	no	no	no	no
SNSD, MMG_PB	Sf._3425:1,2	1	1		Seifhennersdorf	Lower Oligocene	Betulaceae	Carpinus	Carpinus_grandis	deciduous	tree	unlobed	dentate	pinnate	non-looped	F	F	F	no	no	no	no	no	no	no
SNSD, MMG_PB	Sf._3426:1,2	1			Seifhennersdorf	Lower Oligocene	Betulaceae	Carpinus	Carpinus_grandis	deciduous	tree	unlobed	dentate	pinnate	non-looped	F	F	F	no	no	no	no	no	no	no
SNSD, MMG_PB	Sf._3436:1,2	1			Seifhennersdorf	Lower Oligocene	Betulaceae	Carpinus	Carpinus_grandis	deciduous	tree	unlobed	dentate	pinnate	non-looped	F	F	F	no	no	no	no	no	no	no
SNSD, MMG_PB	Sf._3438:1,2	1			Seifhennersdorf	Lower Oligocene	Betulaceae	Carpinus	Carpinus_grandis	deciduous	tree	unlobed	dentate	pinnate	non-looped	F	F	F	no	no	no	no	no	no	no
SNSD, MMG_PB	Sf._3445	1			Seifhennersdorf	Lower Oligocene	Betulaceae	Carpinus	Carpinus_grandis	deciduous	tree	unlobed	dentate	pinnate	non-looped	F	F	F	no	no	no	no	no	no	no
SNSD, MMG_PB	Sf._3447	1	1		Seifhennersdorf	Lower Oligocene	Betulaceae	Carpinus	Carpinus_grandis	deciduous	tree	unlobed	dentate	pinnate	non-looped	F	F	F	no	no	no	no	no	no	no
SNSD, MMG_PB	Sf._3448	1			Seifhennersdorf	Lower Oligocene	Betulaceae	Carpinus	Carpinus_grandis	deciduous	tree	unlobed	dentate	pinnate	non-looped	F	F	F	no	no	no	no	no	no	no
SNSD, MMG_PB	Sf._3451	1	1		Seifhennersdorf	Lower Oligocene	Betulaceae	Carpinus	Carpinus_grandis	deciduous	tree	unlobed	dentate	pinnate	non-looped	F	F	F	no	no	no	no	no	no	no
SNSD, MMG_PB	Sf._3452	1			Seifhennersdorf	Lower Oligocene	Betulaceae	Carpinus	Carpinus_grandis	deciduous	tree	unlobed	dentate	pinnate	non-looped	F	F	F	no	no	no	no	no	no	no
SNSD, MMG_PB	Sf._3454	1			Seifhennersdorf	Lower Oligocene	Betulaceae	Carpinus	Carpinus_grandis	deciduous	tree	unlobed	dentate	pinnate	non-looped	F	F	F	no	no	no	no	no	no	no
SNSD, MMG_PB	Sf._3463:1,2	1			Seifhennersdorf	Lower Oligocene	Betulaceae	Carpinus	Carpinus_grandis	deciduous	tree	unlobed	dentate	pinnate	non-looped	F	F	F	no	no	no	no	no	no	no
SNSD, MMG_PB	Sf._3471	1			Seifhennersdorf	Lower Oligocene	Betulaceae	Carpinus	Carpinus_grandis	deciduous	tree	unlobed	dentate	pinnate	non-looped	F	F	F	no	no	no	no	no	no	no
SNSD, MMG_PB	Sf._3476	1	1		Seifhennersdorf	Lower Oligocene	Betulaceae	Carpinus	Carpinus_grandis	deciduous	tree	unlobed	dentate	pinnate	non-looped	F	F	F	no	no	no	no	no	no	no
SNSD, MMG_PB	Sf._3475	1	1		Seifhennersdorf	Lower Oligocene	Betulaceae	Carpinus	Carpinus_grandis	deciduous	tree	unlobed	dentate	pinnate	non-looped	F	F	F	no	no	no	no	no	no	no
SNSD, MMG_PB	Sf._3479	1			Seifhennersdorf	Lower Oligocene	Betulaceae	Carpinus	Carpinus_grandis	deciduous	tree	unlobed	dentate	pinnate	non-looped	F	F	F	no	no	no	no	no	no	no
SNSD, MMG_PB	Sf._3480	1			Seifhennersdorf	Lower Oligocene	Betulaceae	Carpinus	Carpinus_grandis	deciduous	tree	unlobed	dentate	pinnate	non-looped	F	F	F	no	no	no	no	no	no	no
SNSD, MMG_PB	Sf._3486	1			Seifhennersdorf	Lower Oligocene	Betulaceae	Carpinus	Carpinus_grandis	deciduous	tree	unlobed	dentate	pinnate	non-looped	F	F	F	no	no	no	no	no	no	no
SNSD, MMG_PB	Sf._3489	1	1		Seifhennersdorf	Lower Oligocene	Betulaceae	Carpinus	Carpinus_grandis	deciduous	tree	unlobed	dentate	pinnate	non-looped	F	F	F	no	no	no	no	no	no	no
SNSD, MMG_PB	Sf._3490	1			Seifhennersdorf	Lower Oligocene	Betulaceae	Carpinus	Carpinus_grandis	deciduous	tree	unlobed	dentate	pinnate	non-looped	F	F	F	no	no	no	no	no	no	no
SNSD, MMG_PB	Sf._3500	1	1		Seifhennersdorf	Lower Oligocene	Betulaceae	Carpinus	Carpinus_grandis	deciduous	tree	unlobed	dentate	pinnate	non-looped	F	F	F	no	no	no	no	no	no	no
SNSD, MMG_PB	Sf._3501	1			Seifhennersdorf	Lower Oligocene	Betulaceae	Carpinus	Carpinus_grandis	deciduous	tree	unlobed	dentate	pinnate	non-looped	F	F	F	no	no	no	no	no	no	no
SNSD, MMG_PB	Sf._3502	1			Seifhennersdorf	Lower Oligocene	Betulaceae	Carpinus	Carpinus_grandis	deciduous	tree	unlobed	dentate	pinnate	non-looped	F	F	F	no	no	no	no	no	no	no
SNSD, MMG_PB	Sf._3508:1,2	1			Seifhennersdorf	Lower Oligocene	Betulaceae	Carpinus	Carpinus_grandis	deciduous	tree	unlobed	dentate	pinnate	non-looped	F	F	F	no	no	no	no	no	no	no
SNSD, MMG_PB	Sf._3511:1,2	1			Seifhennersdorf	Lower Oligocene	Betulaceae	Carpinus	Carpinus_grandis	deciduous	tree	unlobed	dentate	pinnate	non-looped	F	F	F	no	no	no	no	no	no	no
SNSD, MMG_PB	Sf._3518	1			Seifhennersdorf	Lower Oligocene	Betulaceae	Carpinus	Carpinus_grandis	deciduous	tree	unlobed	dentate	pinnate	non-looped	F	F	F	no	no	no	no	no	no	no
SNSD, MMG_PB	Sf._3529	1	1		Seifhennersdorf	Lower Oligocene	Betulaceae	Carpinus	Carpinus_grandis	deciduous	tree	unlobed	dentate	pinnate	non-looped	F	F	F	no	no	no	no	no	no	no
SNSD, MMG_PB	Sf._3531:1,2	1			Seifhennersdorf	Lower Oligocene	Betulaceae	Carpinus	Carpinus_grandis	deciduous	tree	unlobed	dentate	pinnate	non-looped	F	F	F	no	no	no	no	no	no	no
SNSD, MMG_PB	Sf._3543:1,2	1	1		Seifhennersdorf	Lower Oligocene	Betulaceae	Carpinus	Carpinus_grandis	deciduous	tree	unlobed	dentate	pinnate	non-looped	F	F	F	no	no	no	no	no	no	no
SNSD, MMG_PB	Sf._3570:1,2	1			Seifhennersdorf	Lower Oligocene	Betulaceae	Carpinus	Carpinus_grandis	deciduous	tree	unlobed	dentate	pinnate	non-looped	F	F	F	no	no	no	no	no	no	no
SNSD, MMG_PB	Sf._3697:1,2	1	1	1	Seifhennersdorf	Lower Oligocene	Betulaceae	Carpinus	Carpinus_grandis	deciduous	tree	unlobed	dentate	pinnate	non-looped	F	F	F	no	no	no	no	no	no	no
SNSD, MMG_PB	Sf._3761b	1			Seifhennersdorf	Lower Oligocene	Betulaceae	Carpinus	Carpinus_grandis	deciduous	tree	unlobed	dentate	pinnate	non-looped	F	F	F	no	no	no	no	no	no	no
SNSD, MMG_PB	Sf._3986	1	1		Seifhennersdorf	Lower Oligocene	Betulaceae	Carpinus	Carpinus_grandis	deciduous	tree	unlobed	dentate	pinnate	non-looped	F	F	F	no	no	no	no	no	no	no
SNSD, MMG_PB	Sf._3987	1			Seifhennersdorf	Lower Oligocene	Betulaceae	Carpinus	Carpinus_grandis	deciduous	tree	unlobed	dentate	pinnate	non-looped	F	F	F	no	no	no	no	no	no	no
SNSD, MMG_PB	Sf._3991	1	1	1	Seifhennersdorf	Lower Oligocene	Betulaceae	Carpinus	Carpinus_grandis	deciduous	tree	unlobed	dentate	pinnate	non-looped	F	F	F	no	no	no	no	no	no	no
SNSD, MMG_PB	Sf._4012	1	1		Seifhennersdorf	Lower Oligocene	Betulaceae	Carpinus	Carpinus_grandis	deciduous	tree	unlobed	dentate	pinnate	non-looped	F	F	F	no	no	no	no	no	no	no
SNSD, MMG_PB	Sf._4016	1			Seifhennersdorf	Lower Oligocene	Betulaceae	Carpinus	Carpinus_grandis	deciduous	tree	unlobed	dentate	pinnate	non-looped	F	F	F	no	no	no	no	no	no	no
SNSD, MMG_PB	Sf._4017	1			Seifhennersdorf	Lower Oligocene	Betulaceae	Carpinus	Carpinus_grandis	deciduous	tree	unlobed	dentate	pinnate	non-looped	F	F	F	no	no	no	no	no	no	no
SNSD, MMG_PB	Sf._4027	1			Seifhennersdorf	Lower Oligocene	Betulaceae	Carpinus	Carpinus_grandis	deciduous	tree	unlobed	dentate	pinnate	non-looped	F	F	F	no	no	no	no	no	no	no
SNSD, MMG_PB	Sf._4041	1			Seifhennersdorf	Lower Oligocene	Betulaceae	Carpinus	Carpinus_grandis	deciduous	tree	unlobed	dentate	pinnate	non-looped	F	F	F	no	no	no	no	no	no	no
SNSD, MMG_PB	Sf._4053	1			Seifhennersdorf	Lower Oligocene	Betulaceae	Carpinus	Carpinus_grandis	deciduous	tree	unlobed	dentate	pinnate	non-looped	F	F	F	no	no	no	no	no	no	no
SNSD, MMG_PB	Sf._4066	1	1		Seifhennersdorf	Lower Oligocene	Betulaceae	Carpinus	Carpinus_grandis	deciduous	tree	unlobed	dentate	pinnate	non-looped	F	F	F	no	no	no	no	no	no	no
SNSD, MMG_PB	Sf._4102	1			Seifhennersdorf	Lower Oligocene	Betulaceae	Carpinus	Carpinus_grandis	deciduous	tree	unlobed	dentate	pinnate	non-looped	F	F	F	no	no	no	no	no	no	no
SNSD, MMG_PB	Sf._4103	1			Seifhennersdorf	Lower Oligocene	Betulaceae	Carpinus	Carpinus_grandis	deciduous	tree	unlobed	dentate	pinnate	non-looped	F	F	F	no	no	no	no	no	no	no
SNSD, MMG_PB	Sf._4106	1			Seifhennersdorf	Lower Oligocene	Betulaceae	Carpinus	Carpinus_grandis	deciduous	tree	unlobed	dentate	pinnate	non-looped	F	F	F	no	no	no	no	no	no	no
SNSD, MMG_PB	Sf._4107	1	1		Seifhennersdorf	Lower Oligocene	Betulaceae	Carpinus	Carpinus_grandis	deciduous	tree	unlobed	dentate	pinnate	non-looped	F	F	F	no	no	no	no	no	no	no
SNSD, MMG_PB	Sf._4108	1			Seifhennersdorf	Lower Oligocene	Betulaceae	Carpinus	Carpinus_grandis	deciduous	tree	unlobed	dentate	pinnate	non-looped	F	F	F	no	no	no	no	no	no	no
SNSD, MMG_PB	Sf._4110	1			Seifhennersdorf	Lower Oligocene	Betulaceae	Carpinus	Carpinus_grandis	deciduous	tree	unlobed	dentate	pinnate	non-looped	F	F	F	no	no	no	no	no	no	no
SNSD, MMG_PB	Sf._4114	1	1		Seifhennersdorf	Lower Oligocene	Betulaceae	Carpinus	Carpinus_grandis	deciduous	tree	unlobed	dentate	pinnate	non-looped	F	F	F	no	no	no	no	no	no	no
SNSD, MMG_PB	Sf._4131	1			Seifhennersdorf	Lower Oligocene	Betulaceae	Carpinus	Carpinus_grandis	deciduous	tree	unlobed	dentate	pinnate	non-looped	F	F	F	no	no	no	no	no	no	no
SNSD, MMG_PB	Sf._4150	1	1		Seifhennersdorf	Lower Oligocene	Betulaceae	Carpinus	Carpinus_grandis	deciduous	tree	unlobed	dentate	pinnate	non-looped	F	F	F	no	no	no	no	no	no	no
SNSD, MMG_PB	Sf._4157	1			Seifhennersdorf	Lower Oligocene	Betulaceae	Carpinus	Carpinus_grandis	deciduous	tree	unlobed	dentate	pinnate	non-looped	F	F	F	no	no	no	no	no	no	no
SNSD, MMG_PB	Sf._4177	1			Seifhennersdorf	Lower Oligocene	Betulaceae	Carpinus	Carpinus_grandis	deciduous	tree	unlobed	dentate	pinnate	non-looped	F	F	F	no	no	no	no	no	no	no
SNSD, MMG_PB	Sf._4187	1			Seifhennersdorf	Lower Oligocene	Betulaceae	Carpinus	Carpinus_grandis	deciduous	tree	unlobed	dentate	pinnate	non-looped	F	F	F	no	no	no	no	no	no	no
SNSD, MMG_PB	Sf._4196	1			Seifhennersdorf	Lower Oligocene	Betulaceae	Carpinus	Carpinus_grandis	deciduous	tree	unlobed	dentate	pinnate	non-looped	F	F	F	no	no	no	no	no	no	no
SNSD, MMG_PB	Sf._4202	1			Seifhennersdorf	Lower Oligocene	Betulaceae	Carpinus	Carpinus_grandis	deciduous	tree	unlobed	dentate	pinnate	non-looped	F	F	F	no	no	no	no	no	no	no
SNSD, MMG_PB	Sf._4209	1			Seifhennersdorf	Lower Oligocene	Betulaceae	Carpinus	Carpinus_grandis	deciduous	tree	unlobed	dentate	pinnate	non-looped	F	F	F	no	no	no	no	no	no	no
SNSD, MMG_PB	Sf._4211	1			Seifhennersdorf	Lower Oligocene	Betulaceae	Carpinus	Carpinus_grandis	deciduous	tree	unlobed	dentate	pinnate	non-looped	F	F	F	no	no	no	no	no	no	no
SNSD, MMG_PB	Sf._4215	1	1		Seifhennersdorf	Lower Oligocene	Betulaceae	Carpinus	Carpinus_grandis	deciduous	tree	unlobed	dentate	pinnate	non-looped	F	F	F	no	no	no	no	no	no	no
SNSD, MMG_PB	Sf._4238	1			Seifhennersdorf	Lower Oligocene	Betulaceae	Carpinus	Carpinus_grandis	deciduous	tree	unlobed	dentate	pinnate	non-looped	F	F	F	no	no	no	no	no	no	no
SNSD, MMG_PB	Sf._4241	1			Seifhennersdorf	Lower Oligocene	Betulaceae	Carpinus	Carpinus_grandis	deciduous	tree	unlobed	dentate	pinnate	non-looped	F	F	F	no	no	no	no	no	no	no
SNSD, MMG_PB	Sf._4243	1			Seifhennersdorf	Lower Oligocene	Betulaceae	Carpinus	Carpinus_grandis	deciduous	tree	unlobed	dentate	pinnate	non-looped	F	F	F	no	no	no	no	no	no	no
SNSD, MMG_PB	Sf._4244	1			Seifhennersdorf	Lower Oligocene	Betulaceae	Carpinus	Carpinus_grandis	deciduous	tree	unlobed	dentate	pinnate	non-looped	F	F	F	no	no	no	no	no	no	no
SNSD, MMG_PB	Sf._4252	1			Seifhennersdorf	Lower Oligocene	Betulaceae	Carpinus	Carpinus_grandis	deciduous	tree	unlobed	dentate	pinnate	non-looped	F	F	F	no	no	no	no	no	no	no
SNSD, MMG_PB	Sf._4257	1			Seifhennersdorf	Lower Oligocene	Betulaceae	Carpinus	Carpinus_grandis	deciduous	tree	unlobed	dentate	pinnate	non-looped	F	F	F	no	no	no	no	no	no	no
SNSD, MMG_PB	Sf._4258	1	1	1	Seifhennersdorf	Lower Oligocene	Betulaceae	Carpinus	Carpinus_grandis	deciduous	tree	unlobed	dentate	pinnate	non-looped	F	F	F	yes	no	yes	no	no	no	no	12
SNSD, MMG_PB	Sf._4300	1			Seifhennersdorf	Lower Oligocene	Betulaceae	Carpinus	Carpinus_grandis	deciduous	tree	unlobed	dentate	pinnate	non-looped	F	F	F	no	no	no	no	no	no	no
SNSD, MMG_PB	Sf._4334b	1			Seifhennersdorf	Lower Oligocene	Betulaceae	Carpinus	Carpinus_grandis	deciduous	tree	unlobed	dentate	pinnate	non-looped	F	F	F	no	no	no	no	no	no	no
SNSD, MMG_PB	Sf._4340	1	1		Seifhennersdorf	Lower Oligocene	Betulaceae	Carpinus	Carpinus_grandis	deciduous	tree	unlobed	dentate	pinnate	non-looped	F	F	F	no	no	no	no	no	no	no
SNSD, MMG_PB	Sf._4343	1	1		Seifhennersdorf	Lower Oligocene	Betulaceae	Carpinus	Carpinus_grandis	deciduous	tree	unlobed	dentate	pinnate	non-looped	F	F	F	no	no	no	no	no	no	no
SNSD, MMG_PB	Sf._4344	1	1		Seifhennersdorf	Lower Oligocene	Betulaceae	Carpinus	Carpinus_grandis	deciduous	tree	unlobed	dentate	pinnate	non-looped	F	F	F	no	no	no	no	no	no	no
SNSD, MMG_PB	Sf._4363	1			Seifhennersdorf	Lower Oligocene	Betulaceae	Carpinus	Carpinus_grandis	deciduous	tree	unlobed	dentate	pinnate	non-looped	F	F	F	no	no	no	no	no	no	no
SNSD, MMG_PB	Sf._4434	1			Seifhennersdorf	Lower Oligocene	Betulaceae	Carpinus	Carpinus_grandis	deciduous	tree	unlobed	dentate	pinnate	non-looped	F	F	F	no	no	no	no	no	no	no
SNSD, MMG_PB	Sf._4435	1	1		Seifhennersdorf	Lower Oligocene	Betulaceae	Carpinus	Carpinus_grandis	deciduous	tree	unlobed	dentate	pinnate	non-looped	F	F	F	no	no	no	no	no	no	no
SNSD, MMG_PB	Sf._4503:2b	1	1		Seifhennersdorf	Lower Oligocene	Betulaceae	Carpinus	Carpinus_grandis	deciduous	tree	unlobed	dentate	pinnate	non-looped	F	F	F	no	no	no	no	no	no	no
SNSD, MMG_PB	Sf._4510b	1	1		Seifhennersdorf	Lower Oligocene	Betulaceae	Carpinus	Carpinus_grandis	deciduous	tree	unlobed	dentate	pinnate	non-looped	F	F	F	no	no	no	no	no	no	no
SNSD, MMG_PB	Sf._4594:1,2b	1	1		Seifhennersdorf	Lower Oligocene	Betulaceae	Carpinus	Carpinus_grandis	deciduous	tree	unlobed	dentate	pinnate	non-looped	F	F	F	no	no	no	no	no	no	no
SNSD, MMG_PB	Sf._4707	1			Seifhennersdorf	Lower Oligocene	Betulaceae	Carpinus	Carpinus_grandis	deciduous	tree	unlobed	dentate	pinnate	non-looped	F	F	F	no	no	no	no	no	no	no
SNSD, MMG_PB	Sf._4710:1,2a	1	1		Seifhennersdorf	Lower Oligocene	Betulaceae	Carpinus	Carpinus_grandis	deciduous	tree	unlobed	dentate	pinnate	non-looped	F	F	F	no	no	no	no	no	no	no
SNSD, MMG_PB	Sf._4710:1,2b	1	1		Seifhennersdorf	Lower Oligocene	Betulaceae	Carpinus	Carpinus_grandis	deciduous	tree	unlobed	dentate	pinnate	non-looped	F	F	F	no	no	no	no	no	no	no
SNSD, MMG_PB	Sf._4711:1,2	1	1		Seifhennersdorf	Lower Oligocene	Betulaceae	Carpinus	Carpinus_grandis	deciduous	tree	unlobed	dentate	pinnate	non-looped	F	F	F	no	no	no	no	no	no	no
SNSD, MMG_PB	Sf._4712:1,2	1	1		Seifhennersdorf	Lower Oligocene	Betulaceae	Carpinus	Carpinus_grandis	deciduous	tree	unlobed	dentate	pinnate	non-looped	F	F	F	no	no	no	no	no	no	no
SNSD, MMG_PB	Sf._4716	1	1		Seifhennersdorf	Lower Oligocene	Betulaceae	Carpinus	Carpinus_grandis	deciduous	tree	unlobed	dentate	pinnate	non-looped	F	F	F	no	no	no	no	no	no	no
SNSD, MMG_PB	Sf._4737:1,2	1	1		Seifhennersdorf	Lower Oligocene	Betulaceae	Carpinus	Carpinus_grandis	deciduous	tree	unlobed	dentate	pinnate	non-looped	F	F	F	no	no	no	no	no	no	no
SNSD, MMG_PB	Sf._4739:1,2	1	1		Seifhennersdorf	Lower Oligocene	Betulaceae	Carpinus	Carpinus_grandis	deciduous	tree	unlobed	dentate	pinnate	non-looped	F	F	F	no	no	no	no	no	no	no
SNSD, MMG_PB	Sf._4742:1,2	1	1	1	Seifhennersdorf	Lower Oligocene	Betulaceae	Carpinus	Carpinus_grandis	deciduous	tree	unlobed	dentate	pinnate	non-looped	F	F	F	no	no	no	no	no	no	no
SNSD, MMG_PB	Sf._4746:1,2	1			Seifhennersdorf	Lower Oligocene	Betulaceae	Carpinus	Carpinus_grandis	deciduous	tree	unlobed	dentate	pinnate	non-looped	F	F	F	no	no	no	no	no	no	no
SNSD, MMG_PB	Sf._4749	1			Seifhennersdorf	Lower Oligocene	Betulaceae	Carpinus	Carpinus_grandis	deciduous	tree	unlobed	dentate	pinnate	non-looped	F	F	F	no	no	no	no	no	no	no
SNSD, MMG_PB	Sf._4750a	1	1		Seifhennersdorf	Lower Oligocene	Betulaceae	Carpinus	Carpinus_grandis	deciduous	tree	unlobed	dentate	pinnate	non-looped	F	F	F	no	no	no	no	no	no	no
SNSD, MMG_PB	Sf._4750b	1	1		Seifhennersdorf	Lower Oligocene	Betulaceae	Carpinus	Carpinus_grandis	deciduous	tree	unlobed	dentate	pinnate	non-looped	F	F	F	no	no	no	no	no	no	no
SNSD, MMG_PB	Sf._4752	1			Seifhennersdorf	Lower Oligocene	Betulaceae	Carpinus	Carpinus_grandis	deciduous	tree	unlobed	dentate	pinnate	non-looped	F	F	F	no	no	no	no	no	no	no
SNSD, MMG_PB	Sf._4754	1	1		Seifhennersdorf	Lower Oligocene	Betulaceae	Carpinus	Carpinus_grandis	deciduous	tree	unlobed	dentate	pinnate	non-looped	F	F	F	no	no	no	no	no	no	no
SNSD, MMG_PB	Sf._4755	1			Seifhennersdorf	Lower Oligocene	Betulaceae	Carpinus	Carpinus_grandis	deciduous	tree	unlobed	dentate	pinnate	non-looped	F	F	F	no	no	no	no	no	no	no
SNSD, MMG_PB	Sf._4757	1	1		Seifhennersdorf	Lower Oligocene	Betulaceae	Carpinus	Carpinus_grandis	deciduous	tree	unlobed	dentate	pinnate	non-looped	F	F	F	no	no	no	no	no	no	no
SNSD, MMG_PB	Sf._4758	1			Seifhennersdorf	Lower Oligocene	Betulaceae	Carpinus	Carpinus_grandis	deciduous	tree	unlobed	dentate	pinnate	non-looped	F	F	F	no	no	no	no	no	no	no
SNSD, MMG_PB	Sf._4759	1			Seifhennersdorf	Lower Oligocene	Betulaceae	Carpinus	Carpinus_grandis	deciduous	tree	unlobed	dentate	pinnate	non-looped	F	F	F	no	no	no	no	no	no	no
SNSD, MMG_PB	Sf._4760 a	1			Seifhennersdorf	Lower Oligocene	Betulaceae	Carpinus	Carpinus_grandis	deciduous	tree	unlobed	dentate	pinnate	non-looped	F	F	F	no	no	no	no	no	no	no
SNSD, MMG_PB	Sf._4760 b	1			Seifhennersdorf	Lower Oligocene	Betulaceae	Carpinus	Carpinus_grandis	deciduous	tree	unlobed	dentate	pinnate	non-looped	F	F	F	no	no	no	no	no	no	no
SNSD, MMG_PB	Sf._4766	1	1		Seifhennersdorf	Lower Oligocene	Betulaceae	Carpinus	Carpinus_grandis	deciduous	tree	unlobed	dentate	pinnate	non-looped	F	F	F	no	no	no	no	no	no	no
SNSD, MMG_PB	Sf._4768	1			Seifhennersdorf	Lower Oligocene	Betulaceae	Carpinus	Carpinus_grandis	deciduous	tree	unlobed	dentate	pinnate	non-looped	F	F	F	no	no	no	no	no	no	no
SNSD, MMG_PB	Sf._4769	1			Seifhennersdorf	Lower Oligocene	Betulaceae	Carpinus	Carpinus_grandis	deciduous	tree	unlobed	dentate	pinnate	non-looped	F	F	F	no	no	no	no	no	no	no
SNSD, MMG_PB	Sf._4773	1			Seifhennersdorf	Lower Oligocene	Betulaceae	Carpinus	Carpinus_grandis	deciduous	tree	unlobed	dentate	pinnate	non-looped	F	F	F	no	no	no	no	no	no	no
SNSD, MMG_PB	Sf._4780	1			Seifhennersdorf	Lower Oligocene	Betulaceae	Carpinus	Carpinus_grandis	deciduous	tree	unlobed	dentate	pinnate	non-looped	F	F	F	no	no	no	no	no	no	no
SNSD, MMG_PB	Sf._4786 a	1			Seifhennersdorf	Lower Oligocene	Betulaceae	Carpinus	Carpinus_grandis	deciduous	tree	unlobed	dentate	pinnate	non-looped	F	F	F	no	no	no	no	no	no	no
SNSD, MMG_PB	Sf._4786 a	1			Seifhennersdorf	Lower Oligocene	Betulaceae	Carpinus	Carpinus_grandis	deciduous	tree	unlobed	dentate	pinnate	non-looped	F	F	F	no	no	no	no	no	no	no
SNSD, MMG_PB	Sf._4787b	1	1		Seifhennersdorf	Lower Oligocene	Betulaceae	Carpinus	Carpinus_grandis	deciduous	tree	unlobed	dentate	pinnate	non-looped	F	F	F	no	no	no	no	no	no	no
SNSD, MMG_PB	Sf._4792	1			Seifhennersdorf	Lower Oligocene	Betulaceae	Carpinus	Carpinus_grandis	deciduous	tree	unlobed	dentate	pinnate	non-looped	F	F	F	no	no	no	no	no	no	no
SNSD, MMG_PB	Sf._4793	1			Seifhennersdorf	Lower Oligocene	Betulaceae	Carpinus	Carpinus_grandis	deciduous	tree	unlobed	dentate	pinnate	non-looped	F	F	F	no	no	no	no	no	no	no
SNSD, MMG_PB	Sf._4799	1			Seifhennersdorf	Lower Oligocene	Betulaceae	Carpinus	Carpinus_grandis	deciduous	tree	unlobed	dentate	pinnate	non-looped	F	F	F	no	no	no	no	no	no	no
SNSD, MMG_PB	Sf._4800	1	1		Seifhennersdorf	Lower Oligocene	Betulaceae	Carpinus	Carpinus_grandis	deciduous	tree	unlobed	dentate	pinnate	non-looped	F	F	F	no	no	no	no	no	no	no
SNSD, MMG_PB	Sf._4802	1			Seifhennersdorf	Lower Oligocene	Betulaceae	Carpinus	Carpinus_grandis	deciduous	tree	unlobed	dentate	pinnate	non-looped	F	F	F	no	no	no	no	no	no	no
SNSD, MMG_PB	Sf._4805:1,2	1			Seifhennersdorf	Lower Oligocene	Betulaceae	Carpinus	Carpinus_grandis	deciduous	tree	unlobed	dentate	pinnate	non-looped	F	F	F	no	no	no	no	no	no	no
SNSD, MMG_PB	Sf._4810a	1			Seifhennersdorf	Lower Oligocene	Betulaceae	Carpinus	Carpinus_grandis	deciduous	tree	unlobed	dentate	pinnate	non-looped	F	F	F	no	no	no	no	no	no	no
SNSD, MMG_PB	Sf._4810b	1	1	1	Seifhennersdorf	Lower Oligocene	Betulaceae	Carpinus	Carpinus_grandis	deciduous	tree	unlobed	dentate	pinnate	non-looped	F	F	F	no	no	no	no	no	no	no
SNSD, MMG_PB	Sf._4814	1	1		Seifhennersdorf	Lower Oligocene	Betulaceae	Carpinus	Carpinus_grandis	deciduous	tree	unlobed	dentate	pinnate	non-looped	F	F	F	no	no	no	no	no	no	no
SNSD, MMG_PB	Sf._4815/4824	1	1		Seifhennersdorf	Lower Oligocene	Betulaceae	Carpinus	Carpinus_grandis	deciduous	tree	unlobed	dentate	pinnate	non-looped	F	F	F	no	no	no	no	no	no	no
SNSD, MMG_PB	Sf._4823	1	1		Seifhennersdorf	Lower Oligocene	Betulaceae	Carpinus	Carpinus_grandis	deciduous	tree	unlobed	dentate	pinnate	non-looped	F	F	F	no	no	no	no	no	no	no
SNSD, MMG_PB	Sf._4833	1			Seifhennersdorf	Lower Oligocene	Betulaceae	Carpinus	Carpinus_grandis	deciduous	tree	unlobed	dentate	pinnate	non-looped	F	F	F	no	no	no	no	no	no	no
SNSD, MMG_PB	Sf._4835	1			Seifhennersdorf	Lower Oligocene	Betulaceae	Carpinus	Carpinus_grandis	deciduous	tree	unlobed	dentate	pinnate	non-looped	F	F	F	no	no	no	no	no	no	no
SNSD, MMG_PB	Sf._4837a	1	1		Seifhennersdorf	Lower Oligocene	Betulaceae	Carpinus	Carpinus_grandis	deciduous	tree	unlobed	dentate	pinnate	non-looped	F	F	F	no	no	no	no	no	no	no
SNSD, MMG_PB	Sf._4838	1			Seifhennersdorf	Lower Oligocene	Betulaceae	Carpinus	Carpinus_grandis	deciduous	tree	unlobed	dentate	pinnate	non-looped	F	F	F	no	no	no	no	no	no	no
SNSD, MMG_PB	Sf._4852	1	1		Seifhennersdorf	Lower Oligocene	Betulaceae	Carpinus	Carpinus_grandis	deciduous	tree	unlobed	dentate	pinnate	non-looped	F	F	F	no	no	no	no	no	no	no
SNSD, MMG_PB	Sf._4853	1	1		Seifhennersdorf	Lower Oligocene	Betulaceae	Carpinus	Carpinus_grandis	deciduous	tree	unlobed	dentate	pinnate	non-looped	F	F	F	no	no	no	no	no	no	no
SNSD, MMG_PB	Sf._4865	1	1		Seifhennersdorf	Lower Oligocene	Betulaceae	Carpinus	Carpinus_grandis	deciduous	tree	unlobed	dentate	pinnate	non-looped	F	F	F	no	no	no	no	no	no	no
SNSD, MMG_PB	Sf._4870	1			Seifhennersdorf	Lower Oligocene	Betulaceae	Carpinus	Carpinus_grandis	deciduous	tree	unlobed	dentate	pinnate	non-looped	F	F	F	yes	yes	no	no	no	no	no	3
SNSD, MMG_PB	Sf._4879	1	1		Seifhennersdorf	Lower Oligocene	Betulaceae	Carpinus	Carpinus_grandis	deciduous	tree	unlobed	dentate	pinnate	non-looped	F	F	F	no	no	no	no	no	no	no
SNSD, MMG_PB	Sf._4880:1,2	1	1	1	Seifhennersdorf	Lower Oligocene	Betulaceae	Carpinus	Carpinus_grandis	deciduous	tree	unlobed	dentate	pinnate	non-looped	F	F	F	no	no	no	no	no	no	no
SNSD, MMG_PB	Sf._4884	1	1	1	Seifhennersdorf	Lower Oligocene	Betulaceae	Carpinus	Carpinus_grandis	deciduous	tree	unlobed	dentate	pinnate	non-looped	F	F	F	no	no	no	no	no	no	no
SNSD, MMG_PB	Sf._4890	1			Seifhennersdorf	Lower Oligocene	Betulaceae	Carpinus	Carpinus_grandis	deciduous	tree	unlobed	dentate	pinnate	non-looped	F	F	F	no	no	no	no	no	no	no
SNSD, MMG_PB	Sf._4891	1			Seifhennersdorf	Lower Oligocene	Betulaceae	Carpinus	Carpinus_grandis	deciduous	tree	unlobed	dentate	pinnate	non-looped	F	F	F	no	no	no	no	no	no	no
SNSD, MMG_PB	Sf._4893a	1			Seifhennersdorf	Lower Oligocene	Betulaceae	Carpinus	Carpinus_grandis	deciduous	tree	unlobed	dentate	pinnate	non-looped	F	F	F	no	no	no	no	no	no	no
SNSD, MMG_PB	Sf._4896	1			Seifhennersdorf	Lower Oligocene	Betulaceae	Carpinus	Carpinus_grandis	deciduous	tree	unlobed	dentate	pinnate	non-looped	F	F	F	no	no	no	no	no	no	no
SNSD, MMG_PB	Sf._4897	1			Seifhennersdorf	Lower Oligocene	Betulaceae	Carpinus	Carpinus_grandis	deciduous	tree	unlobed	dentate	pinnate	non-looped	F	F	F	no	no	no	no	no	no	no
SNSD, MMG_PB	Sf._4898	1			Seifhennersdorf	Lower Oligocene	Betulaceae	Carpinus	Carpinus_grandis	deciduous	tree	unlobed	dentate	pinnate	non-looped	F	F	F	no	no	no	no	no	no	no
SNSD, MMG_PB	Sf._4903	1			Seifhennersdorf	Lower Oligocene	Betulaceae	Carpinus	Carpinus_grandis	deciduous	tree	unlobed	dentate	pinnate	non-looped	F	F	F	no	no	no	no	no	no	no
SNSD, MMG_PB	Sf._4907	1			Seifhennersdorf	Lower Oligocene	Betulaceae	Carpinus	Carpinus_grandis	deciduous	tree	unlobed	dentate	pinnate	non-looped	F	F	F	no	no	no	no	no	no	no
SNSD, MMG_PB	Sf._4909:1,2	1			Seifhennersdorf	Lower Oligocene	Betulaceae	Carpinus	Carpinus_grandis	deciduous	tree	unlobed	dentate	pinnate	non-looped	F	F	F	no	no	no	no	no	no	no
SNSD, MMG_PB	Sf._4910a	1	1		Seifhennersdorf	Lower Oligocene	Betulaceae	Carpinus	Carpinus_grandis	deciduous	tree	unlobed	dentate	pinnate	non-looped	F	F	F	no	no	no	no	no	no	no
SNSD, MMG_PB	Sf._4911	1			Seifhennersdorf	Lower Oligocene	Betulaceae	Carpinus	Carpinus_grandis	deciduous	tree	unlobed	dentate	pinnate	non-looped	F	F	F	no	no	no	no	no	no	no
SNSD, MMG_PB	Sf._4913	1	1		Seifhennersdorf	Lower Oligocene	Betulaceae	Carpinus	Carpinus_grandis	deciduous	tree	unlobed	dentate	pinnate	non-looped	F	F	F	no	no	no	no	no	no	no
SNSD, MMG_PB	Sf._4914	1			Seifhennersdorf	Lower Oligocene	Betulaceae	Carpinus	Carpinus_grandis	deciduous	tree	unlobed	dentate	pinnate	non-looped	F	F	F	no	no	no	no	no	no	no
SNSD, MMG_PB	Sf._4917	1			Seifhennersdorf	Lower Oligocene	Betulaceae	Carpinus	Carpinus_grandis	deciduous	tree	unlobed	dentate	pinnate	non-looped	F	F	F	no	no	no	no	no	no	no
SNSD, MMG_PB	Sf._4920	1			Seifhennersdorf	Lower Oligocene	Betulaceae	Carpinus	Carpinus_grandis	deciduous	tree	unlobed	dentate	pinnate	non-looped	F	F	F	no	no	no	no	no	no	no
SNSD, MMG_PB	Sf._4923	1	1		Seifhennersdorf	Lower Oligocene	Betulaceae	Carpinus	Carpinus_grandis	deciduous	tree	unlobed	dentate	pinnate	non-looped	F	F	F	no	no	no	no	no	no	no
SNSD, MMG_PB	Sf._4924	1	1		Seifhennersdorf	Lower Oligocene	Betulaceae	Carpinus	Carpinus_grandis	deciduous	tree	unlobed	dentate	pinnate	non-looped	F	F	F	no	no	no	no	no	no	no
SNSD, MMG_PB	Sf._4925	1			Seifhennersdorf	Lower Oligocene	Betulaceae	Carpinus	Carpinus_grandis	deciduous	tree	unlobed	dentate	pinnate	non-looped	F	F	F	no	no	no	no	no	no	no
SNSD, MMG_PB	Sf._4926	1	1		Seifhennersdorf	Lower Oligocene	Betulaceae	Carpinus	Carpinus_grandis	deciduous	tree	unlobed	dentate	pinnate	non-looped	F	F	F	no	no	no	no	no	no	no
SNSD, MMG_PB	Sf._4927	1			Seifhennersdorf	Lower Oligocene	Betulaceae	Carpinus	Carpinus_grandis	deciduous	tree	unlobed	dentate	pinnate	non-looped	F	F	F	no	no	no	no	no	no	no
SNSD, MMG_PB	Sf._4928	1	1		Seifhennersdorf	Lower Oligocene	Betulaceae	Carpinus	Carpinus_grandis	deciduous	tree	unlobed	dentate	pinnate	non-looped	F	F	F	no	no	no	no	no	no	no
SNSD, MMG_PB	Sf._4930a	1	1		Seifhennersdorf	Lower Oligocene	Betulaceae	Carpinus	Carpinus_grandis	deciduous	tree	unlobed	dentate	pinnate	non-looped	F	F	F	no	no	no	no	no	no	no
SNSD, MMG_PB	Sf._4931 (I)	1			Seifhennersdorf	Lower Oligocene	Betulaceae	Carpinus	Carpinus_grandis	deciduous	tree	unlobed	dentate	pinnate	non-looped	F	F	F	no	no	no	no	no	no	no
SNSD, MMG_PB	Sf._4932	1			Seifhennersdorf	Lower Oligocene	Betulaceae	Carpinus	Carpinus_grandis	deciduous	tree	unlobed	dentate	pinnate	non-looped	F	F	F	no	no	no	no	no	no	no
SNSD, MMG_PB	Sf._4936	1	1		Seifhennersdorf	Lower Oligocene	Betulaceae	Carpinus	Carpinus_grandis	deciduous	tree	unlobed	dentate	pinnate	non-looped	F	F	F	no	no	no	no	no	no	no
SNSD, MMG_PB	Sf._4937	1	1		Seifhennersdorf	Lower Oligocene	Betulaceae	Carpinus	Carpinus_grandis	deciduous	tree	unlobed	dentate	pinnate	non-looped	F	F	F	no	no	no	no	no	no	no
SNSD, MMG_PB	Sf._4938	1	1		Seifhennersdorf	Lower Oligocene	Betulaceae	Carpinus	Carpinus_grandis	deciduous	tree	unlobed	dentate	pinnate	non-looped	F	F	F	no	no	no	no	no	no	no
SNSD, MMG_PB	Sf._4939	1			Seifhennersdorf	Lower Oligocene	Betulaceae	Carpinus	Carpinus_grandis	deciduous	tree	unlobed	dentate	pinnate	non-looped	F	F	F	no	no	no	no	no	no	no
SNSD, MMG_PB	Sf._4940	1			Seifhennersdorf	Lower Oligocene	Betulaceae	Carpinus	Carpinus_grandis	deciduous	tree	unlobed	dentate	pinnate	non-looped	F	F	F	no	no	no	no	no	no	no
SNSD, MMG_PB	Sf._4941	1			Seifhennersdorf	Lower Oligocene	Betulaceae	Carpinus	Carpinus_grandis	deciduous	tree	unlobed	dentate	pinnate	non-looped	F	F	F	no	no	no	no	no	no	no
SNSD, MMG_PB	Sf._4942	1	1		Seifhennersdorf	Lower Oligocene	Betulaceae	Carpinus	Carpinus_grandis	deciduous	tree	unlobed	dentate	pinnate	non-looped	F	F	F	no	no	no	no	no	no	no
SNSD, MMG_PB	Sf._4943	1			Seifhennersdorf	Lower Oligocene	Betulaceae	Carpinus	Carpinus_grandis	deciduous	tree	unlobed	dentate	pinnate	non-looped	F	F	F	no	no	no	no	no	no	no
SNSD, MMG_PB	Sf._4944	1			Seifhennersdorf	Lower Oligocene	Betulaceae	Carpinus	Carpinus_grandis	deciduous	tree	unlobed	dentate	pinnate	non-looped	F	F	F	no	no	no	no	no	no	no
SNSD, MMG_PB	Sf._4947	1	1		Seifhennersdorf	Lower Oligocene	Betulaceae	Carpinus	Carpinus_grandis	deciduous	tree	unlobed	dentate	pinnate	non-looped	F	F	F	no	no	no	no	no	no	no
SNSD, MMG_PB	Sf._4949	1			Seifhennersdorf	Lower Oligocene	Betulaceae	Carpinus	Carpinus_grandis	deciduous	tree	unlobed	dentate	pinnate	non-looped	F	F	F	no	no	no	no	no	no	no
SNSD, MMG_PB	Sf._4951	1	1	1	Seifhennersdorf	Lower Oligocene	Betulaceae	Carpinus	Carpinus_grandis	deciduous	tree	unlobed	dentate	pinnate	non-looped	F	F	F	no	no	no	no	no	no	no
SNSD, MMG_PB	Sf._4953	1	1		Seifhennersdorf	Lower Oligocene	Betulaceae	Carpinus	Carpinus_grandis	deciduous	tree	unlobed	dentate	pinnate	non-looped	F	F	F	no	no	no	no	no	no	no
SNSD, MMG_PB	Sf._4954	1			Seifhennersdorf	Lower Oligocene	Betulaceae	Carpinus	Carpinus_grandis	deciduous	tree	unlobed	dentate	pinnate	non-looped	F	F	F	no	no	no	no	no	no	no
SNSD, MMG_PB	Sf._4955	1	1		Seifhennersdorf	Lower Oligocene	Betulaceae	Carpinus	Carpinus_grandis	deciduous	tree	unlobed	dentate	pinnate	non-looped	F	F	F	no	no	no	no	no	no	no
SNSD, MMG_PB	Sf._4956	1			Seifhennersdorf	Lower Oligocene	Betulaceae	Carpinus	Carpinus_grandis	deciduous	tree	unlobed	dentate	pinnate	non-looped	F	F	F	no	no	no	no	no	no	no
SNSD, MMG_PB	Sf._4957	1	1		Seifhennersdorf	Lower Oligocene	Betulaceae	Carpinus	Carpinus_grandis	deciduous	tree	unlobed	dentate	pinnate	non-looped	F	F	F	no	no	no	no	no	no	no
SNSD, MMG_PB	Sf._4958	1			Seifhennersdorf	Lower Oligocene	Betulaceae	Carpinus	Carpinus_grandis	deciduous	tree	unlobed	dentate	pinnate	non-looped	F	F	F	no	no	no	no	no	no	no
SNSD, MMG_PB	Sf._4959	1			Seifhennersdorf	Lower Oligocene	Betulaceae	Carpinus	Carpinus_grandis	deciduous	tree	unlobed	dentate	pinnate	non-looped	F	F	F	no	no	no	no	no	no	no
SNSD, MMG_PB	Sf._4964	1			Seifhennersdorf	Lower Oligocene	Betulaceae	Carpinus	Carpinus_grandis	deciduous	tree	unlobed	dentate	pinnate	non-looped	F	F	F	no	no	no	no	no	no	no
SNSD, MMG_PB	Sf._4965	1			Seifhennersdorf	Lower Oligocene	Betulaceae	Carpinus	Carpinus_grandis	deciduous	tree	unlobed	dentate	pinnate	non-looped	F	F	F	no	no	no	no	no	no	no
SNSD, MMG_PB	Sf._4966	1	1		Seifhennersdorf	Lower Oligocene	Betulaceae	Carpinus	Carpinus_grandis	deciduous	tree	unlobed	dentate	pinnate	non-looped	F	F	F	no	no	no	no	no	no	no
SNSD, MMG_PB	Sf._4968	1	1		Seifhennersdorf	Lower Oligocene	Betulaceae	Carpinus	Carpinus_grandis	deciduous	tree	unlobed	dentate	pinnate	non-looped	F	F	F	no	no	no	no	no	no	no
SNSD, MMG_PB	Sf._4969	1			Seifhennersdorf	Lower Oligocene	Betulaceae	Carpinus	Carpinus_grandis	deciduous	tree	unlobed	dentate	pinnate	non-looped	F	F	F	no	no	no	no	no	no	no
SNSD, MMG_PB	Sf._4970	1			Seifhennersdorf	Lower Oligocene	Betulaceae	Carpinus	Carpinus_grandis	deciduous	tree	unlobed	dentate	pinnate	non-looped	F	F	F	no	no	no	no	no	no	no
SNSD, MMG_PB	Sf._4971:1,2	1	1	1	Seifhennersdorf	Lower Oligocene	Betulaceae	Carpinus	Carpinus_grandis	deciduous	tree	unlobed	dentate	pinnate	non-looped	F	F	F	no	no	no	no	no	no	no
SNSD, MMG_PB	Sf._4973	1	1		Seifhennersdorf	Lower Oligocene	Betulaceae	Carpinus	Carpinus_grandis	deciduous	tree	unlobed	dentate	pinnate	non-looped	F	F	F	no	no	no	no	no	no	no
SNSD, MMG_PB	Sf._4976	1			Seifhennersdorf	Lower Oligocene	Betulaceae	Carpinus	Carpinus_grandis	deciduous	tree	unlobed	dentate	pinnate	non-looped	F	F	F	no	no	no	no	no	no	no
SNSD, MMG_PB	Sf._4977	1	1		Seifhennersdorf	Lower Oligocene	Betulaceae	Carpinus	Carpinus_grandis	deciduous	tree	unlobed	dentate	pinnate	non-looped	F	F	F	no	no	no	no	no	no	no
SNSD, MMG_PB	Sf._4978	1	1		Seifhennersdorf	Lower Oligocene	Betulaceae	Carpinus	Carpinus_grandis	deciduous	tree	unlobed	dentate	pinnate	non-looped	F	F	F	no	no	no	no	no	no	no
SNSD, MMG_PB	Sf._4979	1			Seifhennersdorf	Lower Oligocene	Betulaceae	Carpinus	Carpinus_grandis	deciduous	tree	unlobed	dentate	pinnate	non-looped	F	F	F	no	no	no	no	no	no	no
SNSD, MMG_PB	Sf._4980	1			Seifhennersdorf	Lower Oligocene	Betulaceae	Carpinus	Carpinus_grandis	deciduous	tree	unlobed	dentate	pinnate	non-looped	F	F	F	no	no	no	no	no	no	no
SNSD, MMG_PB	Sf._4981	1			Seifhennersdorf	Lower Oligocene	Betulaceae	Carpinus	Carpinus_grandis	deciduous	tree	unlobed	dentate	pinnate	non-looped	F	F	F	no	no	no	no	no	no	no
SNSD, MMG_PB	Sf._4983	1			Seifhennersdorf	Lower Oligocene	Betulaceae	Carpinus	Carpinus_grandis	deciduous	tree	unlobed	dentate	pinnate	non-looped	F	F	F	no	no	no	no	no	no	no
SNSD, MMG_PB	Sf._4984	1			Seifhennersdorf	Lower Oligocene	Betulaceae	Carpinus	Carpinus_grandis	deciduous	tree	unlobed	dentate	pinnate	non-looped	F	F	F	yes	yes	no	no	no	no	no	5
SNSD, MMG_PB	Sf._4985	1			Seifhennersdorf	Lower Oligocene	Betulaceae	Carpinus	Carpinus_grandis	deciduous	tree	unlobed	dentate	pinnate	non-looped	F	F	F	no	no	no	no	no	no	no
SNSD, MMG_PB	Sf._4987:1,2	1	1		Seifhennersdorf	Lower Oligocene	Betulaceae	Carpinus	Carpinus_grandis	deciduous	tree	unlobed	dentate	pinnate	non-looped	F	F	F	no	no	no	no	no	no	no
SNSD, MMG_PB	Sf._4988:1,2	1			Seifhennersdorf	Lower Oligocene	Betulaceae	Carpinus	Carpinus_grandis	deciduous	tree	unlobed	dentate	pinnate	non-looped	F	F	F	no	no	no	no	no	no	no
SNSD, MMG_PB	Sf._4989:1,2	1			Seifhennersdorf	Lower Oligocene	Betulaceae	Carpinus	Carpinus_grandis	deciduous	tree	unlobed	dentate	pinnate	non-looped	F	F	F	no	no	no	no	no	no	no
SNSD, MMG_PB	Sf._4991	1	1		Seifhennersdorf	Lower Oligocene	Betulaceae	Carpinus	Carpinus_grandis	deciduous	tree	unlobed	dentate	pinnate	non-looped	F	F	F	no	no	no	no	no	no	no
SNSD, MMG_PB	Sf._4992	1			Seifhennersdorf	Lower Oligocene	Betulaceae	Carpinus	Carpinus_grandis	deciduous	tree	unlobed	dentate	pinnate	non-looped	F	F	F	no	no	no	no	no	no	no
SNSD, MMG_PB	Sf._4994	1			Seifhennersdorf	Lower Oligocene	Betulaceae	Carpinus	Carpinus_grandis	deciduous	tree	unlobed	dentate	pinnate	non-looped	F	F	F	no	no	no	no	no	no	no
SNSD, MMG_PB	Sf._4995	1	1		Seifhennersdorf	Lower Oligocene	Betulaceae	Carpinus	Carpinus_grandis	deciduous	tree	unlobed	dentate	pinnate	non-looped	F	F	F	no	no	no	no	no	no	no
SNSD, MMG_PB	Sf._4996	1	1		Seifhennersdorf	Lower Oligocene	Betulaceae	Carpinus	Carpinus_grandis	deciduous	tree	unlobed	dentate	pinnate	non-looped	F	F	F	no	no	no	no	no	no	no
SNSD, MMG_PB	Sf._4997	1			Seifhennersdorf	Lower Oligocene	Betulaceae	Carpinus	Carpinus_grandis	deciduous	tree	unlobed	dentate	pinnate	non-looped	F	F	F	no	no	no	no	no	no	no
SNSD, MMG_PB	Sf._5000	1			Seifhennersdorf	Lower Oligocene	Betulaceae	Carpinus	Carpinus_grandis	deciduous	tree	unlobed	dentate	pinnate	non-looped	F	F	F	no	no	no	no	no	no	no
SNSD, MMG_PB	Sf._5001	1	1		Seifhennersdorf	Lower Oligocene	Betulaceae	Carpinus	Carpinus_grandis	deciduous	tree	unlobed	dentate	pinnate	non-looped	F	F	F	no	no	no	no	no	no	no
SNSD, MMG_PB	Sf._5002	1			Seifhennersdorf	Lower Oligocene	Betulaceae	Carpinus	Carpinus_grandis	deciduous	tree	unlobed	dentate	pinnate	non-looped	F	F	F	no	no	no	no	no	no	no
SNSD, MMG_PB	Sf._5003	1			Seifhennersdorf	Lower Oligocene	Betulaceae	Carpinus	Carpinus_grandis	deciduous	tree	unlobed	dentate	pinnate	non-looped	F	F	F	no	no	no	no	no	no	no
SNSD, MMG_PB	Sf._5004	1			Seifhennersdorf	Lower Oligocene	Betulaceae	Carpinus	Carpinus_grandis	deciduous	tree	unlobed	dentate	pinnate	non-looped	F	F	F	no	no	no	no	no	no	no
SNSD, MMG_PB	Sf._5005	1			Seifhennersdorf	Lower Oligocene	Betulaceae	Carpinus	Carpinus_grandis	deciduous	tree	unlobed	dentate	pinnate	non-looped	F	F	F	no	no	no	no	no	no	no
SNSD, MMG_PB	Sf._5006	1			Seifhennersdorf	Lower Oligocene	Betulaceae	Carpinus	Carpinus_grandis	deciduous	tree	unlobed	dentate	pinnate	non-looped	F	F	F	no	no	no	no	no	no	no
SNSD, MMG_PB	Sf._5007	1			Seifhennersdorf	Lower Oligocene	Betulaceae	Carpinus	Carpinus_grandis	deciduous	tree	unlobed	dentate	pinnate	non-looped	F	F	F	no	no	no	no	no	no	no
SNSD, MMG_PB	Sf._5009	1			Seifhennersdorf	Lower Oligocene	Betulaceae	Carpinus	Carpinus_grandis	deciduous	tree	unlobed	dentate	pinnate	non-looped	F	F	F	no	no	no	no	no	no	no
SNSD, MMG_PB	Sf._5011	1			Seifhennersdorf	Lower Oligocene	Betulaceae	Carpinus	Carpinus_grandis	deciduous	tree	unlobed	dentate	pinnate	non-looped	F	F	F	no	no	no	no	no	no	no
SNSD, MMG_PB	Sf._5012	1	1		Seifhennersdorf	Lower Oligocene	Betulaceae	Carpinus	Carpinus_grandis	deciduous	tree	unlobed	dentate	pinnate	non-looped	F	F	F	no	no	no	no	no	no	no
SNSD, MMG_PB	Sf._5013	1	1		Seifhennersdorf	Lower Oligocene	Betulaceae	Carpinus	Carpinus_grandis	deciduous	tree	unlobed	dentate	pinnate	non-looped	F	F	F	no	no	no	no	no	no	no
SNSD, MMG_PB	Sf._5014	1	1		Seifhennersdorf	Lower Oligocene	Betulaceae	Carpinus	Carpinus_grandis	deciduous	tree	unlobed	dentate	pinnate	non-looped	F	F	F	no	no	no	no	no	no	no
SNSD, MMG_PB	Sf._5016	1			Seifhennersdorf	Lower Oligocene	Betulaceae	Carpinus	Carpinus_grandis	deciduous	tree	unlobed	dentate	pinnate	non-looped	F	F	F	no	no	no	no	no	no	no
SNSD, MMG_PB	Sf._5019	1	1		Seifhennersdorf	Lower Oligocene	Betulaceae	Carpinus	Carpinus_grandis	deciduous	tree	unlobed	dentate	pinnate	non-looped	F	F	F	no	no	no	no	no	no	no
SNSD, MMG_PB	Sf._5022	1			Seifhennersdorf	Lower Oligocene	Betulaceae	Carpinus	Carpinus_grandis	deciduous	tree	unlobed	dentate	pinnate	non-looped	F	F	F	no	no	no	no	no	no	no
SNSD, MMG_PB	Sf._5023	1	1		Seifhennersdorf	Lower Oligocene	Betulaceae	Carpinus	Carpinus_grandis	deciduous	tree	unlobed	dentate	pinnate	non-looped	F	F	F	no	no	no	no	no	no	no
SNSD, MMG_PB	Sf._5024	1	1		Seifhennersdorf	Lower Oligocene	Betulaceae	Carpinus	Carpinus_grandis	deciduous	tree	unlobed	dentate	pinnate	non-looped	F	F	F	no	no	no	no	no	no	no
SNSD, MMG_PB	Sf._5025	1	1		Seifhennersdorf	Lower Oligocene	Betulaceae	Carpinus	Carpinus_grandis	deciduous	tree	unlobed	dentate	pinnate	non-looped	F	F	F	no	no	no	no	no	no	no
SNSD, MMG_PB	Sf._5026	1	1		Seifhennersdorf	Lower Oligocene	Betulaceae	Carpinus	Carpinus_grandis	deciduous	tree	unlobed	dentate	pinnate	non-looped	F	F	F	no	no	no	no	no	no	no
SNSD, MMG_PB	Sf._5027	1			Seifhennersdorf	Lower Oligocene	Betulaceae	Carpinus	Carpinus_grandis	deciduous	tree	unlobed	dentate	pinnate	non-looped	F	F	F	no	no	no	no	no	no	no
SNSD, MMG_PB	Sf._5029	1	1		Seifhennersdorf	Lower Oligocene	Betulaceae	Carpinus	Carpinus_grandis	deciduous	tree	unlobed	dentate	pinnate	non-looped	F	F	F	no	no	no	no	no	no	no
SNSD, MMG_PB	Sf._5030	1	1		Seifhennersdorf	Lower Oligocene	Betulaceae	Carpinus	Carpinus_grandis	deciduous	tree	unlobed	dentate	pinnate	non-looped	F	F	F	yes	no	yes	no	no	no	no	12
SNSD, MMG_PB	Sf._5032	1			Seifhennersdorf	Lower Oligocene	Betulaceae	Carpinus	Carpinus_grandis	deciduous	tree	unlobed	dentate	pinnate	non-looped	F	F	F	no	no	no	no	no	no	no
SNSD, MMG_PB	Sf._5038	1	1		Seifhennersdorf	Lower Oligocene	Betulaceae	Carpinus	Carpinus_grandis	deciduous	tree	unlobed	dentate	pinnate	non-looped	F	F	F	no	no	no	no	no	no	no
SNSD, MMG_PB	Sf._5039	1			Seifhennersdorf	Lower Oligocene	Betulaceae	Carpinus	Carpinus_grandis	deciduous	tree	unlobed	dentate	pinnate	non-looped	F	F	F	no	no	no	no	no	no	no
SNSD, MMG_PB	Sf._5040	1			Seifhennersdorf	Lower Oligocene	Betulaceae	Carpinus	Carpinus_grandis	deciduous	tree	unlobed	dentate	pinnate	non-looped	F	F	F	no	no	no	no	no	no	no
SNSD, MMG_PB	Sf._5043	1	1		Seifhennersdorf	Lower Oligocene	Betulaceae	Carpinus	Carpinus_grandis	deciduous	tree	unlobed	dentate	pinnate	non-looped	F	F	F	yes	yes	no	no	no	no	no	2
SNSD, MMG_PB	Sf._5045b	1	1		Seifhennersdorf	Lower Oligocene	Betulaceae	Carpinus	Carpinus_grandis	deciduous	tree	unlobed	dentate	pinnate	non-looped	F	F	F	no	no	no	no	no	no	no
SNSD, MMG_PB	Sf._5046	1	1		Seifhennersdorf	Lower Oligocene	Betulaceae	Carpinus	Carpinus_grandis	deciduous	tree	unlobed	dentate	pinnate	non-looped	F	F	F	no	no	no	no	no	no	no
SNSD, MMG_PB	Sf._5047	1	1		Seifhennersdorf	Lower Oligocene	Betulaceae	Carpinus	Carpinus_grandis	deciduous	tree	unlobed	dentate	pinnate	non-looped	F	F	F	no	no	no	no	no	no	no
SNSD, MMG_PB	Sf._5049	1			Seifhennersdorf	Lower Oligocene	Betulaceae	Carpinus	Carpinus_grandis	deciduous	tree	unlobed	dentate	pinnate	non-looped	F	F	F	no	no	no	no	no	no	no
SNSD, MMG_PB	Sf._5050	1	1		Seifhennersdorf	Lower Oligocene	Betulaceae	Carpinus	Carpinus_grandis	deciduous	tree	unlobed	dentate	pinnate	non-looped	F	F	F	no	no	no	no	no	no	no
SNSD, MMG_PB	Sf._5052	1			Seifhennersdorf	Lower Oligocene	Betulaceae	Carpinus	Carpinus_grandis	deciduous	tree	unlobed	dentate	pinnate	non-looped	F	F	F	no	no	no	no	no	no	no
SNSD, MMG_PB	Sf._5055	1			Seifhennersdorf	Lower Oligocene	Betulaceae	Carpinus	Carpinus_grandis	deciduous	tree	unlobed	dentate	pinnate	non-looped	F	F	F	no	no	no	no	no	no	no
SNSD, MMG_PB	Sf._5057:1,2	1	1		Seifhennersdorf	Lower Oligocene	Betulaceae	Carpinus	Carpinus_grandis	deciduous	tree	unlobed	dentate	pinnate	non-looped	F	F	F	no	no	no	no	no	no	no
SNSD, MMG_PB	Sf._5058:1,2	1	1		Seifhennersdorf	Lower Oligocene	Betulaceae	Carpinus	Carpinus_grandis	deciduous	tree	unlobed	dentate	pinnate	non-looped	F	F	F	no	no	no	no	no	no	no
SNSD, MMG_PB	Sf._5061	1			Seifhennersdorf	Lower Oligocene	Betulaceae	Carpinus	Carpinus_grandis	deciduous	tree	unlobed	dentate	pinnate	non-looped	F	F	F	no	no	no	no	no	no	no
SNSD, MMG_PB	Sf._5063	1	1		Seifhennersdorf	Lower Oligocene	Betulaceae	Carpinus	Carpinus_grandis	deciduous	tree	unlobed	dentate	pinnate	non-looped	F	F	F	no	no	no	no	no	no	no
SNSD, MMG_PB	Sf._5064:1,2,3	1	1		Seifhennersdorf	Lower Oligocene	Betulaceae	Carpinus	Carpinus_grandis	deciduous	tree	unlobed	dentate	pinnate	non-looped	F	F	F	yes	yes	no	no	no	no	no	2
SNSD, MMG_PB	Sf._5066	1			Seifhennersdorf	Lower Oligocene	Betulaceae	Carpinus	Carpinus_grandis	deciduous	tree	unlobed	dentate	pinnate	non-looped	F	F	F	no	no	no	no	no	no	no
SNSD, MMG_PB	Sf._5069	1	1		Seifhennersdorf	Lower Oligocene	Betulaceae	Carpinus	Carpinus_grandis	deciduous	tree	unlobed	dentate	pinnate	non-looped	F	F	F	no	no	no	no	no	no	no
SNSD, MMG_PB	Sf._5073	1	1	1	Seifhennersdorf	Lower Oligocene	Betulaceae	Carpinus	Carpinus_grandis	deciduous	tree	unlobed	dentate	pinnate	non-looped	F	F	F	no	no	no	no	no	no	no
SNSD, MMG_PB	Sf._5074	1			Seifhennersdorf	Lower Oligocene	Betulaceae	Carpinus	Carpinus_grandis	deciduous	tree	unlobed	dentate	pinnate	non-looped	F	F	F	no	no	no	no	no	no	no
SNSD, MMG_PB	Sf._5077	1			Seifhennersdorf	Lower Oligocene	Betulaceae	Carpinus	Carpinus_grandis	deciduous	tree	unlobed	dentate	pinnate	non-looped	F	F	F	no	no	no	no	no	no	no
SNSD, MMG_PB	Sf._5078	1	1		Seifhennersdorf	Lower Oligocene	Betulaceae	Carpinus	Carpinus_grandis	deciduous	tree	unlobed	dentate	pinnate	non-looped	F	F	F	no	no	no	no	no	no	no
SNSD, MMG_PB	Sf._5081	1			Seifhennersdorf	Lower Oligocene	Betulaceae	Carpinus	Carpinus_grandis	deciduous	tree	unlobed	dentate	pinnate	non-looped	F	F	F	no	no	no	no	no	no	no
SNSD, MMG_PB	Sf._5082	1			Seifhennersdorf	Lower Oligocene	Betulaceae	Carpinus	Carpinus_grandis	deciduous	tree	unlobed	dentate	pinnate	non-looped	F	F	F	no	no	no	no	no	no	no
SNSD, MMG_PB	Sf._5091	1	1		Seifhennersdorf	Lower Oligocene	Betulaceae	Carpinus	Carpinus_grandis	deciduous	tree	unlobed	dentate	pinnate	non-looped	F	F	F	no	no	no	no	no	no	no
SNSD, MMG_PB	Sf._5092	1	1		Seifhennersdorf	Lower Oligocene	Betulaceae	Carpinus	Carpinus_grandis	deciduous	tree	unlobed	dentate	pinnate	non-looped	F	F	F	no	no	no	no	no	no	no
SNSD, MMG_PB	Sf._5093	1			Seifhennersdorf	Lower Oligocene	Betulaceae	Carpinus	Carpinus_grandis	deciduous	tree	unlobed	dentate	pinnate	non-looped	F	F	F	no	no	no	no	no	no	no
SNSD, MMG_PB	Sf._5094	1	1		Seifhennersdorf	Lower Oligocene	Betulaceae	Carpinus	Carpinus_grandis	deciduous	tree	unlobed	dentate	pinnate	non-looped	F	F	F	no	no	no	no	no	no	no
SNSD, MMG_PB	Sf._5096	1	1		Seifhennersdorf	Lower Oligocene	Betulaceae	Carpinus	Carpinus_grandis	deciduous	tree	unlobed	dentate	pinnate	non-looped	F	F	F	no	no	no	no	no	no	no
SNSD, MMG_PB	Sf._5099	1	1		Seifhennersdorf	Lower Oligocene	Betulaceae	Carpinus	Carpinus_grandis	deciduous	tree	unlobed	dentate	pinnate	non-looped	F	F	F	no	no	no	no	no	no	no
SNSD, MMG_PB	Sf._5100	1	1		Seifhennersdorf	Lower Oligocene	Betulaceae	Carpinus	Carpinus_grandis	deciduous	tree	unlobed	dentate	pinnate	non-looped	F	F	F	yes	yes	no	no	no	no	no	2	3
SNSD, MMG_PB	Sf._5102	1			Seifhennersdorf	Lower Oligocene	Betulaceae	Carpinus	Carpinus_grandis	deciduous	tree	unlobed	dentate	pinnate	non-looped	F	F	F	yes	no	yes	no	no	no	no	12
SNSD, MMG_PB	Sf._5103	1			Seifhennersdorf	Lower Oligocene	Betulaceae	Carpinus	Carpinus_grandis	deciduous	tree	unlobed	dentate	pinnate	non-looped	F	F	F	no	no	no	no	no	no	no
SNSD, MMG_PB	Sf._5104	1	1		Seifhennersdorf	Lower Oligocene	Betulaceae	Carpinus	Carpinus_grandis	deciduous	tree	unlobed	dentate	pinnate	non-looped	F	F	F	no	no	no	no	no	no	no
SNSD, MMG_PB	Sf._5109	1			Seifhennersdorf	Lower Oligocene	Betulaceae	Carpinus	Carpinus_grandis	deciduous	tree	unlobed	dentate	pinnate	non-looped	F	F	F	yes	yes	no	no	no	no	no	2
SNSD, MMG_PB	Sf._5111	1	1		Seifhennersdorf	Lower Oligocene	Betulaceae	Carpinus	Carpinus_grandis	deciduous	tree	unlobed	dentate	pinnate	non-looped	F	F	F	no	no	no	no	no	no	no
SNSD, MMG_PB	Sf._5112:1,2	1			Seifhennersdorf	Lower Oligocene	Betulaceae	Carpinus	Carpinus_grandis	deciduous	tree	unlobed	dentate	pinnate	non-looped	F	F	F	no	no	no	no	no	no	no
SNSD, MMG_PB	Sf._5114:1,2	1	1		Seifhennersdorf	Lower Oligocene	Betulaceae	Carpinus	Carpinus_grandis	deciduous	tree	unlobed	dentate	pinnate	non-looped	F	F	F	no	no	no	no	no	no	no
SNSD, MMG_PB	Sf._5115	1			Seifhennersdorf	Lower Oligocene	Betulaceae	Carpinus	Carpinus_grandis	deciduous	tree	unlobed	dentate	pinnate	non-looped	F	F	F	no	no	no	no	no	no	no
SNSD, MMG_PB	Sf._5117	1			Seifhennersdorf	Lower Oligocene	Betulaceae	Carpinus	Carpinus_grandis	deciduous	tree	unlobed	dentate	pinnate	non-looped	F	F	F	no	no	no	no	no	no	no
SNSD, MMG_PB	Sf._5120	1	1	1	Seifhennersdorf	Lower Oligocene	Betulaceae	Carpinus	Carpinus_grandis	deciduous	tree	unlobed	dentate	pinnate	non-looped	F	F	F	no	no	no	no	no	no	no
SNSD, MMG_PB	Sf._5122	1			Seifhennersdorf	Lower Oligocene	Betulaceae	Carpinus	Carpinus_grandis	deciduous	tree	unlobed	dentate	pinnate	non-looped	F	F	F	no	no	no	no	no	no	no
SNSD, MMG_PB	Sf._5123	1	1	1	Seifhennersdorf	Lower Oligocene	Betulaceae	Carpinus	Carpinus_grandis	deciduous	tree	unlobed	dentate	pinnate	non-looped	F	F	F	yes	yes	no	no	no	no	no	2
SNSD, MMG_PB	Sf._5126	1	1		Seifhennersdorf	Lower Oligocene	Betulaceae	Carpinus	Carpinus_grandis	deciduous	tree	unlobed	dentate	pinnate	non-looped	F	F	F	no	no	no	no	no	no	no
SNSD, MMG_PB	Sf._5127	1			Seifhennersdorf	Lower Oligocene	Betulaceae	Carpinus	Carpinus_grandis	deciduous	tree	unlobed	dentate	pinnate	non-looped	F	F	F	no	no	no	no	no	no	no
SNSD, MMG_PB	Sf._5128	1	1		Seifhennersdorf	Lower Oligocene	Betulaceae	Carpinus	Carpinus_grandis	deciduous	tree	unlobed	dentate	pinnate	non-looped	F	F	F	no	no	no	no	no	no	no
SNSD, MMG_PB	Sf._5131	1	1		Seifhennersdorf	Lower Oligocene	Betulaceae	Carpinus	Carpinus_grandis	deciduous	tree	unlobed	dentate	pinnate	non-looped	F	F	F	no	no	no	no	no	no	no
SNSD, MMG_PB	Sf._5137	1	1		Seifhennersdorf	Lower Oligocene	Betulaceae	Carpinus	Carpinus_grandis	deciduous	tree	unlobed	dentate	pinnate	non-looped	F	F	F	no	no	no	no	no	no	no
SNSD, MMG_PB	Sf._5138	1	1		Seifhennersdorf	Lower Oligocene	Betulaceae	Carpinus	Carpinus_grandis	deciduous	tree	unlobed	dentate	pinnate	non-looped	F	F	F	no	no	no	no	no	no	no
SNSD, MMG_PB	Sf._5139	1	1		Seifhennersdorf	Lower Oligocene	Betulaceae	Carpinus	Carpinus_grandis	deciduous	tree	unlobed	dentate	pinnate	non-looped	F	F	F	no	no	no	no	no	no	no
SNSD, MMG_PB	Sf._5140	1	1		Seifhennersdorf	Lower Oligocene	Betulaceae	Carpinus	Carpinus_grandis	deciduous	tree	unlobed	dentate	pinnate	non-looped	F	F	F	no	no	no	no	no	no	no
SNSD, MMG_PB	Sf._5141	1			Seifhennersdorf	Lower Oligocene	Betulaceae	Carpinus	Carpinus_grandis	deciduous	tree	unlobed	dentate	pinnate	non-looped	F	F	F	no	no	no	no	no	no	no
SNSD, MMG_PB	Sf._5142	1			Seifhennersdorf	Lower Oligocene	Betulaceae	Carpinus	Carpinus_grandis	deciduous	tree	unlobed	dentate	pinnate	non-looped	F	F	F	no	no	no	no	no	no	no
SNSD, MMG_PB	Sf._5143a	1	1		Seifhennersdorf	Lower Oligocene	Betulaceae	Carpinus	Carpinus_grandis	deciduous	tree	unlobed	dentate	pinnate	non-looped	F	F	F	no	no	no	no	no	no	no
SNSD, MMG_PB	Sf._5144a	1	1		Seifhennersdorf	Lower Oligocene	Betulaceae	Carpinus	Carpinus_grandis	deciduous	tree	unlobed	dentate	pinnate	non-looped	F	F	F	no	no	no	no	no	no	no
SNSD, MMG_PB	Sf._5146	1			Seifhennersdorf	Lower Oligocene	Betulaceae	Carpinus	Carpinus_grandis	deciduous	tree	unlobed	dentate	pinnate	non-looped	F	F	F	no	no	no	no	no	no	no
SNSD, MMG_PB	Sf._5148	1			Seifhennersdorf	Lower Oligocene	Betulaceae	Carpinus	Carpinus_grandis	deciduous	tree	unlobed	dentate	pinnate	non-looped	F	F	F	no	no	no	no	no	no	no
SNSD, MMG_PB	Sf._5149a	1	1	1	Seifhennersdorf	Lower Oligocene	Betulaceae	Carpinus	Carpinus_grandis	deciduous	tree	unlobed	dentate	pinnate	non-looped	F	F	F	no	no	no	no	no	no	no
SNSD, MMG_PB	Sf._5149b	1			Seifhennersdorf	Lower Oligocene	Betulaceae	Carpinus	Carpinus_grandis	deciduous	tree	unlobed	dentate	pinnate	non-looped	F	F	F	no	no	no	no	no	no	no
SNSD, MMG_PB	Sf._5151	1			Seifhennersdorf	Lower Oligocene	Betulaceae	Carpinus	Carpinus_grandis	deciduous	tree	unlobed	dentate	pinnate	non-looped	F	F	F	no	no	no	no	no	no	no
SNSD, MMG_PB	Sf._5152	1	1		Seifhennersdorf	Lower Oligocene	Betulaceae	Carpinus	Carpinus_grandis	deciduous	tree	unlobed	dentate	pinnate	non-looped	F	F	F	yes	yes	no	no	no	no	no	2
SNSD, MMG_PB	Sf._5155	1	1		Seifhennersdorf	Lower Oligocene	Betulaceae	Carpinus	Carpinus_grandis	deciduous	tree	unlobed	dentate	pinnate	non-looped	F	F	F	no	no	no	no	no	no	no
SNSD, MMG_PB	Sf._5159:1,2	1	1		Seifhennersdorf	Lower Oligocene	Betulaceae	Carpinus	Carpinus_grandis	deciduous	tree	unlobed	dentate	pinnate	non-looped	F	F	F	yes	yes	no	no	no	no	no	78
SNSD, MMG_PB	Sf._5161	1			Seifhennersdorf	Lower Oligocene	Betulaceae	Carpinus	Carpinus_grandis	deciduous	tree	unlobed	dentate	pinnate	non-looped	F	F	F	no	no	no	no	no	no	no
SNSD, MMG_PB	Sf._5162	1			Seifhennersdorf	Lower Oligocene	Betulaceae	Carpinus	Carpinus_grandis	deciduous	tree	unlobed	dentate	pinnate	non-looped	F	F	F	no	no	no	no	no	no	no
SNSD, MMG_PB	Sf._5163	1			Seifhennersdorf	Lower Oligocene	Betulaceae	Carpinus	Carpinus_grandis	deciduous	tree	unlobed	dentate	pinnate	non-looped	F	F	F	no	no	no	no	no	no	no
SNSD, MMG_PB	Sf._5164	1	1		Seifhennersdorf	Lower Oligocene	Betulaceae	Carpinus	Carpinus_grandis	deciduous	tree	unlobed	dentate	pinnate	non-looped	F	F	F	no	no	no	no	no	no	no
SNSD, MMG_PB	Sf._5167	1	1		Seifhennersdorf	Lower Oligocene	Betulaceae	Carpinus	Carpinus_grandis	deciduous	tree	unlobed	dentate	pinnate	non-looped	F	F	F	no	no	no	no	no	no	no
SNSD, MMG_PB	Sf._5168	1			Seifhennersdorf	Lower Oligocene	Betulaceae	Carpinus	Carpinus_grandis	deciduous	tree	unlobed	dentate	pinnate	non-looped	F	F	F	no	no	no	no	no	no	no
SNSD, MMG_PB	Sf._5171	1			Seifhennersdorf	Lower Oligocene	Betulaceae	Carpinus	Carpinus_grandis	deciduous	tree	unlobed	dentate	pinnate	non-looped	F	F	F	no	no	no	no	no	no	no
SNSD, MMG_PB	Sf._5172	1	1	1	Seifhennersdorf	Lower Oligocene	Betulaceae	Carpinus	Carpinus_grandis	deciduous	tree	unlobed	dentate	pinnate	non-looped	F	F	F	no	no	no	no	no	no	no
SNSD, MMG_PB	Sf._5173	1	1		Seifhennersdorf	Lower Oligocene	Betulaceae	Carpinus	Carpinus_grandis	deciduous	tree	unlobed	dentate	pinnate	non-looped	F	F	F	no	no	no	no	no	no	no
SNSD, MMG_PB	Sf._5174:1:2	1			Seifhennersdorf	Lower Oligocene	Betulaceae	Carpinus	Carpinus_grandis	deciduous	tree	unlobed	dentate	pinnate	non-looped	F	F	F	no	no	no	no	no	no	no
SNSD, MMG_PB	Sf._5175	1	1		Seifhennersdorf	Lower Oligocene	Betulaceae	Carpinus	Carpinus_grandis	deciduous	tree	unlobed	dentate	pinnate	non-looped	F	F	F	no	no	no	no	no	no	no
SNSD, MMG_PB	Sf._5176	1	1		Seifhennersdorf	Lower Oligocene	Betulaceae	Carpinus	Carpinus_grandis	deciduous	tree	unlobed	dentate	pinnate	non-looped	F	F	F	no	no	no	no	no	no	no
SNSD, MMG_PB	Sf._5179	1	1	1	Seifhennersdorf	Lower Oligocene	Betulaceae	Carpinus	Carpinus_grandis	deciduous	tree	unlobed	dentate	pinnate	non-looped	F	F	F	no	no	no	no	no	no	no
SNSD, MMG_PB	Sf._5181	1			Seifhennersdorf	Lower Oligocene	Betulaceae	Carpinus	Carpinus_grandis	deciduous	tree	unlobed	dentate	pinnate	non-looped	F	F	F	yes	no	yes	no	no	no	no	214
SNSD, MMG_PB	Sf._5183	1			Seifhennersdorf	Lower Oligocene	Betulaceae	Carpinus	Carpinus_grandis	deciduous	tree	unlobed	dentate	pinnate	non-looped	F	F	F	no	no	no	no	no	no	no
SNSD, MMG_PB	Sf._5184	1			Seifhennersdorf	Lower Oligocene	Betulaceae	Carpinus	Carpinus_grandis	deciduous	tree	unlobed	dentate	pinnate	non-looped	F	F	F	no	no	no	no	no	no	no
SNSD, MMG_PB	Sf._5185	1			Seifhennersdorf	Lower Oligocene	Betulaceae	Carpinus	Carpinus_grandis	deciduous	tree	unlobed	dentate	pinnate	non-looped	F	F	F	yes	no	yes	no	no	no	no	12
SNSD, MMG_PB	Sf._5186	1			Seifhennersdorf	Lower Oligocene	Betulaceae	Carpinus	Carpinus_grandis	deciduous	tree	unlobed	dentate	pinnate	non-looped	F	F	F	no	no	no	no	no	no	no
SNSD, MMG_PB	Sf._5188	1			Seifhennersdorf	Lower Oligocene	Betulaceae	Carpinus	Carpinus_grandis	deciduous	tree	unlobed	dentate	pinnate	non-looped	F	F	F	no	no	no	no	no	no	no
SNSD, MMG_PB	Sf._5189	1			Seifhennersdorf	Lower Oligocene	Betulaceae	Carpinus	Carpinus_grandis	deciduous	tree	unlobed	dentate	pinnate	non-looped	F	F	F	no	no	no	no	no	no	no
SNSD, MMG_PB	Sf._5193	1	1		Seifhennersdorf	Lower Oligocene	Betulaceae	Carpinus	Carpinus_grandis	deciduous	tree	unlobed	dentate	pinnate	non-looped	F	F	F	no	no	no	no	no	no	no
SNSD, MMG_PB	Sf._5194	1			Seifhennersdorf	Lower Oligocene	Betulaceae	Carpinus	Carpinus_grandis	deciduous	tree	unlobed	dentate	pinnate	non-looped	F	F	F	no	no	no	no	no	no	no
SNSD, MMG_PB	Sf._5195	1	1	1	Seifhennersdorf	Lower Oligocene	Betulaceae	Carpinus	Carpinus_grandis	deciduous	tree	unlobed	dentate	pinnate	non-looped	F	F	F	no	no	no	no	no	no	no
SNSD, MMG_PB	Sf._5197a	1			Seifhennersdorf	Lower Oligocene	Betulaceae	Carpinus	Carpinus_grandis	deciduous	tree	unlobed	dentate	pinnate	non-looped	F	F	F	no	no	no	no	no	no	no
SNSD, MMG_PB	Sf._5200	1	1	1	Seifhennersdorf	Lower Oligocene	Betulaceae	Carpinus	Carpinus_grandis	deciduous	tree	unlobed	dentate	pinnate	non-looped	F	F	F	no	no	no	no	no	no	no
SNSD, MMG_PB	Sf._5203:1,2	1			Seifhennersdorf	Lower Oligocene	Betulaceae	Carpinus	Carpinus_grandis	deciduous	tree	unlobed	dentate	pinnate	non-looped	F	F	F	no	no	no	no	no	no	no
SNSD, MMG_PB	Sf._5204	1			Seifhennersdorf	Lower Oligocene	Betulaceae	Carpinus	Carpinus_grandis	deciduous	tree	unlobed	dentate	pinnate	non-looped	F	F	F	no	no	no	no	no	no	no
SNSD, MMG_PB	Sf._5205	1	1		Seifhennersdorf	Lower Oligocene	Betulaceae	Carpinus	Carpinus_grandis	deciduous	tree	unlobed	dentate	pinnate	non-looped	F	F	F	no	no	no	no	no	no	no
SNSD, MMG_PB	Sf._5206	1			Seifhennersdorf	Lower Oligocene	Betulaceae	Carpinus	Carpinus_grandis	deciduous	tree	unlobed	dentate	pinnate	non-looped	F	F	F	no	no	no	no	no	no	no
SNSD, MMG_PB	Sf._5207	1	1		Seifhennersdorf	Lower Oligocene	Betulaceae	Carpinus	Carpinus_grandis	deciduous	tree	unlobed	dentate	pinnate	non-looped	F	F	F	no	no	no	no	no	no	no
SNSD, MMG_PB	Sf._5208	1	1		Seifhennersdorf	Lower Oligocene	Betulaceae	Carpinus	Carpinus_grandis	deciduous	tree	unlobed	dentate	pinnate	non-looped	F	F	F	no	no	no	no	no	no	no
SNSD, MMG_PB	Sf._5209	1			Seifhennersdorf	Lower Oligocene	Betulaceae	Carpinus	Carpinus_grandis	deciduous	tree	unlobed	dentate	pinnate	non-looped	F	F	F	no	no	no	no	no	no	no
SNSD, MMG_PB	Sf._5210:1,2	1	1		Seifhennersdorf	Lower Oligocene	Betulaceae	Carpinus	Carpinus_grandis	deciduous	tree	unlobed	dentate	pinnate	non-looped	F	F	F	no	no	no	no	no	no	no
SNSD, MMG_PB	Sf._5212	1	1		Seifhennersdorf	Lower Oligocene	Betulaceae	Carpinus	Carpinus_grandis	deciduous	tree	unlobed	dentate	pinnate	non-looped	F	F	F	no	no	no	no	no	no	no
SNSD, MMG_PB	Sf._5213	1	1		Seifhennersdorf	Lower Oligocene	Betulaceae	Carpinus	Carpinus_grandis	deciduous	tree	unlobed	dentate	pinnate	non-looped	F	F	F	no	no	no	no	no	no	no
SNSD, MMG_PB	Sf._5214	1			Seifhennersdorf	Lower Oligocene	Betulaceae	Carpinus	Carpinus_grandis	deciduous	tree	unlobed	dentate	pinnate	non-looped	F	F	F	no	no	no	no	no	no	no
SNSD, MMG_PB	Sf._5215	1			Seifhennersdorf	Lower Oligocene	Betulaceae	Carpinus	Carpinus_grandis	deciduous	tree	unlobed	dentate	pinnate	non-looped	F	F	F	yes	no	yes	no	no	no	no	12
SNSD, MMG_PB	Sf._5217:1,2	1	1		Seifhennersdorf	Lower Oligocene	Betulaceae	Carpinus	Carpinus_grandis	deciduous	tree	unlobed	dentate	pinnate	non-looped	F	F	F	no	no	no	no	no	no	no
SNSD, MMG_PB	Sf._5218	1			Seifhennersdorf	Lower Oligocene	Betulaceae	Carpinus	Carpinus_grandis	deciduous	tree	unlobed	dentate	pinnate	non-looped	F	F	F	no	no	no	no	no	no	no
SNSD, MMG_PB	Sf._5219	1			Seifhennersdorf	Lower Oligocene	Betulaceae	Carpinus	Carpinus_grandis	deciduous	tree	unlobed	dentate	pinnate	non-looped	F	F	F	no	no	no	no	no	no	no
SNSD, MMG_PB	Sf._5222	1			Seifhennersdorf	Lower Oligocene	Betulaceae	Carpinus	Carpinus_grandis	deciduous	tree	unlobed	dentate	pinnate	non-looped	F	F	F	no	no	no	no	no	no	no
SNSD, MMG_PB	Sf._5223	1			Seifhennersdorf	Lower Oligocene	Betulaceae	Carpinus	Carpinus_grandis	deciduous	tree	unlobed	dentate	pinnate	non-looped	F	F	F	no	no	no	no	no	no	no
SNSD, MMG_PB	Sf._5224	1			Seifhennersdorf	Lower Oligocene	Betulaceae	Carpinus	Carpinus_grandis	deciduous	tree	unlobed	dentate	pinnate	non-looped	F	F	F	yes	yes	no	no	no	no	no	57
SNSD, MMG_PB	Sf._5226	1	1		Seifhennersdorf	Lower Oligocene	Betulaceae	Carpinus	Carpinus_grandis	deciduous	tree	unlobed	dentate	pinnate	non-looped	F	F	F	no	no	no	no	no	no	no
SNSD, MMG_PB	Sf._5229a	1	1		Seifhennersdorf	Lower Oligocene	Betulaceae	Carpinus	Carpinus_grandis	deciduous	tree	unlobed	dentate	pinnate	non-looped	F	F	F	no	no	no	no	no	no	no
SNSD, MMG_PB	Sf._5232	1	1		Seifhennersdorf	Lower Oligocene	Betulaceae	Carpinus	Carpinus_grandis	deciduous	tree	unlobed	dentate	pinnate	non-looped	F	F	F	no	no	no	no	no	no	no
SNSD, MMG_PB	Sf._5234	1			Seifhennersdorf	Lower Oligocene	Betulaceae	Carpinus	Carpinus_grandis	deciduous	tree	unlobed	dentate	pinnate	non-looped	F	F	F	no	no	no	no	no	no	no
SNSD, MMG_PB	Sf._5235	1			Seifhennersdorf	Lower Oligocene	Betulaceae	Carpinus	Carpinus_grandis	deciduous	tree	unlobed	dentate	pinnate	non-looped	F	F	F	no	no	no	no	no	no	no
SNSD, MMG_PB	Sf._5236	1	1		Seifhennersdorf	Lower Oligocene	Betulaceae	Carpinus	Carpinus_grandis	deciduous	tree	unlobed	dentate	pinnate	non-looped	F	F	F	no	no	no	no	no	no	no
SNSD, MMG_PB	Sf._5237	1	1		Seifhennersdorf	Lower Oligocene	Betulaceae	Carpinus	Carpinus_grandis	deciduous	tree	unlobed	dentate	pinnate	non-looped	F	F	F	yes	yes	no	no	no	no	no	78
SNSD, MMG_PB	Sf._5239	1			Seifhennersdorf	Lower Oligocene	Betulaceae	Carpinus	Carpinus_grandis	deciduous	tree	unlobed	dentate	pinnate	non-looped	F	F	F	no	no	no	no	no	no	no
SNSD, MMG_PB	Sf._5240	1			Seifhennersdorf	Lower Oligocene	Betulaceae	Carpinus	Carpinus_grandis	deciduous	tree	unlobed	dentate	pinnate	non-looped	F	F	F	no	no	no	no	no	no	no
SNSD, MMG_PB	Sf._5241:1,2	1	1		Seifhennersdorf	Lower Oligocene	Betulaceae	Carpinus	Carpinus_grandis	deciduous	tree	unlobed	dentate	pinnate	non-looped	F	F	F	no	no	no	no	no	no	no
SNSD, MMG_PB	Sf._5242	1			Seifhennersdorf	Lower Oligocene	Betulaceae	Carpinus	Carpinus_grandis	deciduous	tree	unlobed	dentate	pinnate	non-looped	F	F	F	no	no	no	no	no	no	no
SNSD, MMG_PB	Sf._5243	1	1		Seifhennersdorf	Lower Oligocene	Betulaceae	Carpinus	Carpinus_grandis	deciduous	tree	unlobed	dentate	pinnate	non-looped	F	F	F	no	no	no	no	no	no	no
SNSD, MMG_PB	Sf._5244	1			Seifhennersdorf	Lower Oligocene	Betulaceae	Carpinus	Carpinus_grandis	deciduous	tree	unlobed	dentate	pinnate	non-looped	F	F	F	no	no	no	no	no	no	no
SNSD, MMG_PB	Sf._5246	1	1		Seifhennersdorf	Lower Oligocene	Betulaceae	Carpinus	Carpinus_grandis	deciduous	tree	unlobed	dentate	pinnate	non-looped	F	F	F	no	no	no	no	no	no	no
SNSD, MMG_PB	Sf._5247	1			Seifhennersdorf	Lower Oligocene	Betulaceae	Carpinus	Carpinus_grandis	deciduous	tree	unlobed	dentate	pinnate	non-looped	F	F	F	no	no	no	no	no	no	no
SNSD, MMG_PB	Sf._5248	1	1	1	Seifhennersdorf	Lower Oligocene	Betulaceae	Carpinus	Carpinus_grandis	deciduous	tree	unlobed	dentate	pinnate	non-looped	F	F	F	no	no	no	no	no	no	no
SNSD, MMG_PB	Sf._5249	1	1		Seifhennersdorf	Lower Oligocene	Betulaceae	Carpinus	Carpinus_grandis	deciduous	tree	unlobed	dentate	pinnate	non-looped	F	F	F	yes	yes	no	no	no	no	no	2
SNSD, MMG_PB	Sf._5250:1,2	1			Seifhennersdorf	Lower Oligocene	Betulaceae	Carpinus	Carpinus_grandis	deciduous	tree	unlobed	dentate	pinnate	non-looped	F	F	F	no	no	no	no	no	no	no
SNSD, MMG_PB	Sf._5251	1	1	1	Seifhennersdorf	Lower Oligocene	Betulaceae	Carpinus	Carpinus_grandis	deciduous	tree	unlobed	dentate	pinnate	non-looped	F	F	F	no	no	no	no	no	no	no
SNSD, MMG_PB	Sf._5253	1			Seifhennersdorf	Lower Oligocene	Betulaceae	Carpinus	Carpinus_grandis	deciduous	tree	unlobed	dentate	pinnate	non-looped	F	F	F	no	no	no	no	no	no	no
SNSD, MMG_PB	Sf._5254	1	1		Seifhennersdorf	Lower Oligocene	Betulaceae	Carpinus	Carpinus_grandis	deciduous	tree	unlobed	dentate	pinnate	non-looped	F	F	F	no	no	no	no	no	no	no
SNSD, MMG_PB	Sf._5255	1			Seifhennersdorf	Lower Oligocene	Betulaceae	Carpinus	Carpinus_grandis	deciduous	tree	unlobed	dentate	pinnate	non-looped	F	F	F	no	no	no	no	no	no	no
SNSD, MMG_PB	Sf._5258	1	1		Seifhennersdorf	Lower Oligocene	Betulaceae	Carpinus	Carpinus_grandis	deciduous	tree	unlobed	dentate	pinnate	non-looped	F	F	F	no	no	no	no	no	no	no
SNSD, MMG_PB	Sf._5259	1			Seifhennersdorf	Lower Oligocene	Betulaceae	Carpinus	Carpinus_grandis	deciduous	tree	unlobed	dentate	pinnate	non-looped	F	F	F	no	no	no	no	no	no	no
SNSD, MMG_PB	Sf._5260	1			Seifhennersdorf	Lower Oligocene	Betulaceae	Carpinus	Carpinus_grandis	deciduous	tree	unlobed	dentate	pinnate	non-looped	F	F	F	no	no	no	no	no	no	no
SNSD, MMG_PB	Sf._5261:1,2	1			Seifhennersdorf	Lower Oligocene	Betulaceae	Carpinus	Carpinus_grandis	deciduous	tree	unlobed	dentate	pinnate	non-looped	F	F	F	no	no	no	no	no	no	no
SNSD, MMG_PB	Sf._5262:1,2	1	1		Seifhennersdorf	Lower Oligocene	Betulaceae	Carpinus	Carpinus_grandis	deciduous	tree	unlobed	dentate	pinnate	non-looped	F	F	F	no	no	no	no	no	no	no
SNSD, MMG_PB	Sf._5264	1			Seifhennersdorf	Lower Oligocene	Betulaceae	Carpinus	Carpinus_grandis	deciduous	tree	unlobed	dentate	pinnate	non-looped	F	F	F	no	no	no	no	no	no	no
SNSD, MMG_PB	Sf._5265	1	1		Seifhennersdorf	Lower Oligocene	Betulaceae	Carpinus	Carpinus_grandis	deciduous	tree	unlobed	dentate	pinnate	non-looped	F	F	F	no	no	no	no	no	no	no
SNSD, MMG_PB	Sf._5266	1			Seifhennersdorf	Lower Oligocene	Betulaceae	Carpinus	Carpinus_grandis	deciduous	tree	unlobed	dentate	pinnate	non-looped	F	F	F	no	no	no	no	no	no	no
SNSD, MMG_PB	Sf._5267	1			Seifhennersdorf	Lower Oligocene	Betulaceae	Carpinus	Carpinus_grandis	deciduous	tree	unlobed	dentate	pinnate	non-looped	F	F	F	no	no	no	no	no	no	no
SNSD, MMG_PB	Sf._5268	1	1		Seifhennersdorf	Lower Oligocene	Betulaceae	Carpinus	Carpinus_grandis	deciduous	tree	unlobed	dentate	pinnate	non-looped	F	F	F	no	no	no	no	no	no	no
SNSD, MMG_PB	Sf._5269	1	1		Seifhennersdorf	Lower Oligocene	Betulaceae	Carpinus	Carpinus_grandis	deciduous	tree	unlobed	dentate	pinnate	non-looped	F	F	F	no	no	no	no	no	no	no
SNSD, MMG_PB	Sf._5270	1			Seifhennersdorf	Lower Oligocene	Betulaceae	Carpinus	Carpinus_grandis	deciduous	tree	unlobed	dentate	pinnate	non-looped	F	F	F	no	no	no	no	no	no	no
SNSD, MMG_PB	Sf._5271	1	1		Seifhennersdorf	Lower Oligocene	Betulaceae	Carpinus	Carpinus_grandis	deciduous	tree	unlobed	dentate	pinnate	non-looped	F	F	F	no	no	no	no	no	no	no
SNSD, MMG_PB	Sf._5272:1,2	1	1		Seifhennersdorf	Lower Oligocene	Betulaceae	Carpinus	Carpinus_grandis	deciduous	tree	unlobed	dentate	pinnate	non-looped	F	F	F	no	no	no	no	no	no	no
SNSD, MMG_PB	Sf._5273	1	1		Seifhennersdorf	Lower Oligocene	Betulaceae	Carpinus	Carpinus_grandis	deciduous	tree	unlobed	dentate	pinnate	non-looped	F	F	F	no	no	no	no	no	no	no
SNSD, MMG_PB	Sf._5274	1	1	1	Seifhennersdorf	Lower Oligocene	Betulaceae	Carpinus	Carpinus_grandis	deciduous	tree	unlobed	dentate	pinnate	non-looped	F	F	F	no	no	no	no	no	no	no
SNSD, MMG_PB	Sf._5275	1	1		Seifhennersdorf	Lower Oligocene	Betulaceae	Carpinus	Carpinus_grandis	deciduous	tree	unlobed	dentate	pinnate	non-looped	F	F	F	no	no	no	no	no	no	no
SNSD, MMG_PB	Sf._5277	1	1		Seifhennersdorf	Lower Oligocene	Betulaceae	Carpinus	Carpinus_grandis	deciduous	tree	unlobed	dentate	pinnate	non-looped	F	F	F	no	no	no	no	no	no	no
SNSD, MMG_PB	Sf._5278	1	1		Seifhennersdorf	Lower Oligocene	Betulaceae	Carpinus	Carpinus_grandis	deciduous	tree	unlobed	dentate	pinnate	non-looped	F	F	F	no	no	no	no	no	no	no
SNSD, MMG_PB	Sf._5279	1	1		Seifhennersdorf	Lower Oligocene	Betulaceae	Carpinus	Carpinus_grandis	deciduous	tree	unlobed	dentate	pinnate	non-looped	F	F	F	no	no	no	no	no	no	no
SNSD, MMG_PB	Sf._5280	1	1		Seifhennersdorf	Lower Oligocene	Betulaceae	Carpinus	Carpinus_grandis	deciduous	tree	unlobed	dentate	pinnate	non-looped	F	F	F	no	no	no	no	no	no	no
SNSD, MMG_PB	Sf._5284	1	1		Seifhennersdorf	Lower Oligocene	Betulaceae	Carpinus	Carpinus_grandis	deciduous	tree	unlobed	dentate	pinnate	non-looped	F	F	F	no	no	no	no	no	no	no
SNSD, MMG_PB	Sf._5285	1	1		Seifhennersdorf	Lower Oligocene	Betulaceae	Carpinus	Carpinus_grandis	deciduous	tree	unlobed	dentate	pinnate	non-looped	F	F	F	no	no	no	no	no	no	no
SNSD, MMG_PB	Sf._5286/5283	1	1		Seifhennersdorf	Lower Oligocene	Betulaceae	Carpinus	Carpinus_grandis	deciduous	tree	unlobed	dentate	pinnate	non-looped	F	F	F	no	no	no	no	no	no	no
SNSD, MMG_PB	Sf._5287	1			Seifhennersdorf	Lower Oligocene	Betulaceae	Carpinus	Carpinus_grandis	deciduous	tree	unlobed	dentate	pinnate	non-looped	F	F	F	no	no	no	no	no	no	no
SNSD, MMG_PB	Sf._5288	1			Seifhennersdorf	Lower Oligocene	Betulaceae	Carpinus	Carpinus_grandis	deciduous	tree	unlobed	dentate	pinnate	non-looped	F	F	F	no	no	no	no	no	no	no
SNSD, MMG_PB	Sf._5289	1	1		Seifhennersdorf	Lower Oligocene	Betulaceae	Carpinus	Carpinus_grandis	deciduous	tree	unlobed	dentate	pinnate	non-looped	F	F	F	no	no	no	no	no	no	no
SNSD, MMG_PB	Sf._5290	1			Seifhennersdorf	Lower Oligocene	Betulaceae	Carpinus	Carpinus_grandis	deciduous	tree	unlobed	dentate	pinnate	non-looped	F	F	F	no	no	no	no	no	no	no
SNSD, MMG_PB	Sf._5291	1			Seifhennersdorf	Lower Oligocene	Betulaceae	Carpinus	Carpinus_grandis	deciduous	tree	unlobed	dentate	pinnate	non-looped	F	F	F	no	no	no	no	no	no	no
SNSD, MMG_PB	Sf._5292	1	1		Seifhennersdorf	Lower Oligocene	Betulaceae	Carpinus	Carpinus_grandis	deciduous	tree	unlobed	dentate	pinnate	non-looped	F	F	F	no	no	no	no	no	no	no
SNSD, MMG_PB	Sf._5293	1	1		Seifhennersdorf	Lower Oligocene	Betulaceae	Carpinus	Carpinus_grandis	deciduous	tree	unlobed	dentate	pinnate	non-looped	F	F	F	no	no	no	no	no	no	no
SNSD, MMG_PB	Sf._5296	1	1		Seifhennersdorf	Lower Oligocene	Betulaceae	Carpinus	Carpinus_grandis	deciduous	tree	unlobed	dentate	pinnate	non-looped	F	F	F	no	no	no	no	no	no	no
SNSD, MMG_PB	Sf._5297	1			Seifhennersdorf	Lower Oligocene	Betulaceae	Carpinus	Carpinus_grandis	deciduous	tree	unlobed	dentate	pinnate	non-looped	F	F	F	no	no	no	no	no	no	no
SNSD, MMG_PB	Sf._5298:1,2 a1	1			Seifhennersdorf	Lower Oligocene	Betulaceae	Carpinus	Carpinus_grandis	deciduous	tree	unlobed	dentate	pinnate	non-looped	F	F	F	no	no	no	no	no	no	no
SNSD, MMG_PB	Sf._5298:1,2 a2	1			Seifhennersdorf	Lower Oligocene	Betulaceae	Carpinus	Carpinus_grandis	deciduous	tree	unlobed	dentate	pinnate	non-looped	F	F	F	no	no	no	no	no	no	no
SNSD, MMG_PB	Sf._5299	1	1		Seifhennersdorf	Lower Oligocene	Betulaceae	Carpinus	Carpinus_grandis	deciduous	tree	unlobed	dentate	pinnate	non-looped	F	F	F	no	no	no	no	no	no	no
SNSD, MMG_PB	Sf._5300	1	1		Seifhennersdorf	Lower Oligocene	Betulaceae	Carpinus	Carpinus_grandis	deciduous	tree	unlobed	dentate	pinnate	non-looped	F	F	F	no	no	no	no	no	no	no
SNSD, MMG_PB	Sf._5301	1			Seifhennersdorf	Lower Oligocene	Betulaceae	Carpinus	Carpinus_grandis	deciduous	tree	unlobed	dentate	pinnate	non-looped	F	F	F	no	no	no	no	no	no	no
SNSD, MMG_PB	Sf._5302	1	1		Seifhennersdorf	Lower Oligocene	Betulaceae	Carpinus	Carpinus_grandis	deciduous	tree	unlobed	dentate	pinnate	non-looped	F	F	F	no	no	no	no	no	no	no
SNSD, MMG_PB	Sf._5304	1			Seifhennersdorf	Lower Oligocene	Betulaceae	Carpinus	Carpinus_grandis	deciduous	tree	unlobed	dentate	pinnate	non-looped	F	F	F	no	no	no	no	no	no	no
SNSD, MMG_PB	Sf._5306	1			Seifhennersdorf	Lower Oligocene	Betulaceae	Carpinus	Carpinus_grandis	deciduous	tree	unlobed	dentate	pinnate	non-looped	F	F	F	no	no	no	no	no	no	no
SNSD, MMG_PB	Sf._5307	1			Seifhennersdorf	Lower Oligocene	Betulaceae	Carpinus	Carpinus_grandis	deciduous	tree	unlobed	dentate	pinnate	non-looped	F	F	F	no	no	no	no	no	no	no
SNSD, MMG_PB	Sf._5308	1			Seifhennersdorf	Lower Oligocene	Betulaceae	Carpinus	Carpinus_grandis	deciduous	tree	unlobed	dentate	pinnate	non-looped	F	F	F	no	no	no	no	no	no	no
SNSD, MMG_PB	Sf._5309	1	1	1	Seifhennersdorf	Lower Oligocene	Betulaceae	Carpinus	Carpinus_grandis	deciduous	tree	unlobed	dentate	pinnate	non-looped	F	F	F	no	no	no	no	no	no	no
SNSD, MMG_PB	Sf._5310	1	1		Seifhennersdorf	Lower Oligocene	Betulaceae	Carpinus	Carpinus_grandis	deciduous	tree	unlobed	dentate	pinnate	non-looped	F	F	F	no	no	no	no	no	no	no
SNSD, MMG_PB	Sf._5311	1			Seifhennersdorf	Lower Oligocene	Betulaceae	Carpinus	Carpinus_grandis	deciduous	tree	unlobed	dentate	pinnate	non-looped	F	F	F	no	no	no	no	no	no	no
SNSD, MMG_PB	Sf._5312	1	1	1	Seifhennersdorf	Lower Oligocene	Betulaceae	Carpinus	Carpinus_grandis	deciduous	tree	unlobed	dentate	pinnate	non-looped	F	F	F	no	no	no	no	no	no	no
SNSD, MMG_PB	Sf._5313	1			Seifhennersdorf	Lower Oligocene	Betulaceae	Carpinus	Carpinus_grandis	deciduous	tree	unlobed	dentate	pinnate	non-looped	F	F	F	no	no	no	no	no	no	no
SNSD, MMG_PB	Sf._5314	1	1		Seifhennersdorf	Lower Oligocene	Betulaceae	Carpinus	Carpinus_grandis	deciduous	tree	unlobed	dentate	pinnate	non-looped	F	F	F	no	no	no	no	no	no	no
SNSD, MMG_PB	Sf._5315	1			Seifhennersdorf	Lower Oligocene	Betulaceae	Carpinus	Carpinus_grandis	deciduous	tree	unlobed	dentate	pinnate	non-looped	F	F	F	no	no	no	no	no	no	no
SNSD, MMG_PB	Sf._5322b	1	1		Seifhennersdorf	Lower Oligocene	Betulaceae	Carpinus	Carpinus_grandis	deciduous	tree	unlobed	dentate	pinnate	non-looped	F	F	F	no	no	no	no	no	no	no
SNSD, MMG_PB	Sf._5325b	1			Seifhennersdorf	Lower Oligocene	Betulaceae	Carpinus	Carpinus_grandis	deciduous	tree	unlobed	dentate	pinnate	non-looped	F	F	F	no	no	no	no	no	no	no
SNSD, MMG_PB	Sf._5350a	1	1		Seifhennersdorf	Lower Oligocene	Betulaceae	Carpinus	Carpinus_grandis	deciduous	tree	unlobed	dentate	pinnate	non-looped	F	F	F	no	no	no	no	no	no	no
SNSD, MMG_PB	Sf._5397	1	1	1	Seifhennersdorf	Lower Oligocene	Betulaceae	Carpinus	Carpinus_grandis	deciduous	tree	unlobed	dentate	pinnate	non-looped	F	F	F	no	no	no	no	no	no	no
SNSD, MMG_PB	Sf._5447	1			Seifhennersdorf	Lower Oligocene	Betulaceae	Carpinus	Carpinus_grandis	deciduous	tree	unlobed	dentate	pinnate	non-looped	F	F	F	no	no	no	no	no	no	no
SNSD, MMG_PB	Sf._5489a	1			Seifhennersdorf	Lower Oligocene	Betulaceae	Carpinus	Carpinus_grandis	deciduous	tree	unlobed	dentate	pinnate	non-looped	F	F	F	no	no	no	no	no	no	no
SNSD, MMG_PB	Sf._5500	1	1		Seifhennersdorf	Lower Oligocene	Betulaceae	Carpinus	Carpinus_grandis	deciduous	tree	unlobed	dentate	pinnate	non-looped	F	F	F	no	no	no	no	no	no	no
SNSD, MMG_PB	Sf._5574	1	1		Seifhennersdorf	Lower Oligocene	Betulaceae	Carpinus	Carpinus_grandis	deciduous	tree	unlobed	dentate	pinnate	non-looped	F	F	F	no	no	no	no	no	no	no
SNSD, MMG_PB	Sf._5642b	1			Seifhennersdorf	Lower Oligocene	Betulaceae	Carpinus	Carpinus_grandis	deciduous	tree	unlobed	dentate	pinnate	non-looped	F	F	F	no	no	no	no	no	no	no
SNSD, MMG_PB	Sf._5646b	1			Seifhennersdorf	Lower Oligocene	Betulaceae	Carpinus	Carpinus_grandis	deciduous	tree	unlobed	dentate	pinnate	non-looped	F	F	F	no	no	no	no	no	no	no
SNSD, MMG_PB	Sf._5647	1	1		Seifhennersdorf	Lower Oligocene	Betulaceae	Carpinus	Carpinus_grandis	deciduous	tree	unlobed	dentate	pinnate	non-looped	F	F	F	no	no	no	no	no	no	no
SNSD, MMG_PB	Sf._5662	1			Seifhennersdorf	Lower Oligocene	Betulaceae	Carpinus	Carpinus_grandis	deciduous	tree	unlobed	dentate	pinnate	non-looped	F	F	F	no	no	no	no	no	no	no
SNSD, MMG_PB	Sf._5689	1	1		Seifhennersdorf	Lower Oligocene	Betulaceae	Carpinus	Carpinus_grandis	deciduous	tree	unlobed	dentate	pinnate	non-looped	F	F	F	no	no	no	no	no	no	no
SNSD, MMG_PB	Sf._5766a	1	1		Seifhennersdorf	Lower Oligocene	Betulaceae	Carpinus	Carpinus_grandis	deciduous	tree	unlobed	dentate	pinnate	non-looped	F	F	F	no	no	no	no	no	no	no
SNSD, MMG_PB	Sf._5799a	1			Seifhennersdorf	Lower Oligocene	Betulaceae	Carpinus	Carpinus_grandis	deciduous	tree	unlobed	dentate	pinnate	non-looped	F	F	F	no	no	no	no	no	no	no
SNSD, MMG_PB	Sf._5806a	1			Seifhennersdorf	Lower Oligocene	Betulaceae	Carpinus	Carpinus_grandis	deciduous	tree	unlobed	dentate	pinnate	non-looped	F	F	F	no	no	no	no	no	no	no
SNSD, MMG_PB	Sf._5807a	1			Seifhennersdorf	Lower Oligocene	Betulaceae	Carpinus	Carpinus_grandis	deciduous	tree	unlobed	dentate	pinnate	non-looped	F	F	F	no	no	no	no	no	no	no
SNSD, MMG_PB	Sf._5818a:1,2	1	1		Seifhennersdorf	Lower Oligocene	Betulaceae	Carpinus	Carpinus_grandis	deciduous	tree	unlobed	dentate	pinnate	non-looped	F	F	F	no	no	no	no	no	no	no
SNSD, MMG_PB	Sf._6089b	1	1		Seifhennersdorf	Lower Oligocene	Betulaceae	Carpinus	Carpinus_grandis	deciduous	tree	unlobed	dentate	pinnate	non-looped	F	F	F	no	no	no	no	no	no	no
SNSD, MMG_PB	Sf._6116b	1	1		Seifhennersdorf	Lower Oligocene	Betulaceae	Carpinus	Carpinus_grandis	deciduous	tree	unlobed	dentate	pinnate	non-looped	F	F	F	no	no	no	no	no	no	no
SNSD, MMG_PB	Sf._6118b	1	1		Seifhennersdorf	Lower Oligocene	Betulaceae	Carpinus	Carpinus_grandis	deciduous	tree	unlobed	dentate	pinnate	non-looped	F	F	F	no	no	no	no	no	no	no
SNSD, MMG_PB	Sf._6520b	1	1		Seifhennersdorf	Lower Oligocene	Betulaceae	Carpinus	Carpinus_grandis	deciduous	tree	unlobed	dentate	pinnate	non-looped	F	F	F	no	no	no	no	no	no	no
SNSD, MMG_PB	Sf._6641	1	1		Seifhennersdorf	Lower Oligocene	Betulaceae	Carpinus	Carpinus_grandis	deciduous	tree	unlobed	dentate	pinnate	non-looped	F	F	F	no	no	no	no	no	no	no
SNSD, MMG_PB	Sf._7206 b	1	1		Seifhennersdorf	Lower Oligocene	Betulaceae	Carpinus	Carpinus_grandis	deciduous	tree	unlobed	dentate	pinnate	non-looped	F	F	F	no	no	no	no	no	no	no
SNSD, MMG_PB	Sf._7239	1			Seifhennersdorf	Lower Oligocene	Betulaceae	Carpinus	Carpinus_grandis	deciduous	tree	unlobed	dentate	pinnate	non-looped	F	F	F	no	no	no	no	no	no	no
SNSD, MMG_PB	Sf._7241	1	1		Seifhennersdorf	Lower Oligocene	Betulaceae	Carpinus	Carpinus_grandis	deciduous	tree	unlobed	dentate	pinnate	non-looped	F	F	F	no	no	no	no	no	no	no
SNSD, MMG_PB	Sf._7267a	1	1		Seifhennersdorf	Lower Oligocene	Betulaceae	Carpinus	Carpinus_grandis	deciduous	tree	unlobed	dentate	pinnate	non-looped	F	F	F	no	no	no	no	no	no	no
SNSD, MMG_PB	Sf._7732:1	1	1		Seifhennersdorf	Lower Oligocene	Betulaceae	Carpinus	Carpinus_grandis	deciduous	tree	unlobed	dentate	pinnate	non-looped	F	F	F	no	no	no	no	no	no	no
SNSD, MMG_PB	Sf._7831:1,2	1	1	1	Seifhennersdorf	Lower Oligocene	Betulaceae	Carpinus	Carpinus_grandis	deciduous	tree	unlobed	dentate	pinnate	non-looped	F	F	F	no	no	no	no	no	no	no
SNSD, MMG_PB	Sf._7843	1	1	1	Seifhennersdorf	Lower Oligocene	Betulaceae	Carpinus	Carpinus_grandis	deciduous	tree	unlobed	dentate	pinnate	non-looped	F	F	F	no	no	no	no	no	no	no
SNSD, MMG_PB	Sf._7844	1	1		Seifhennersdorf	Lower Oligocene	Betulaceae	Carpinus	Carpinus_grandis	deciduous	tree	unlobed	dentate	pinnate	non-looped	F	F	F	no	no	no	no	no	no	no
SNSD, MMG_PB	Sf._7846	1	1	1	Seifhennersdorf	Lower Oligocene	Betulaceae	Carpinus	Carpinus_grandis	deciduous	tree	unlobed	dentate	pinnate	non-looped	F	F	F	no	no	no	no	no	no	no
SNSD, MMG_PB	Sf._7847	1	1		Seifhennersdorf	Lower Oligocene	Betulaceae	Carpinus	Carpinus_grandis	deciduous	tree	unlobed	dentate	pinnate	non-looped	F	F	F	no	no	no	no	no	no	no
SNSD, MMG_PB	Sf._7878	1	1		Seifhennersdorf	Lower Oligocene	Betulaceae	Carpinus	Carpinus_grandis	deciduous	tree	unlobed	dentate	pinnate	non-looped	F	F	F	no	no	no	no	no	no	no
SNSD, MMG_PB	Sf._7890	1	1		Seifhennersdorf	Lower Oligocene	Betulaceae	Carpinus	Carpinus_grandis	deciduous	tree	unlobed	dentate	pinnate	non-looped	F	F	F	no	no	no	no	no	no	no
SNSD, MMG_PB	Sf._7891	1	1		Seifhennersdorf	Lower Oligocene	Betulaceae	Carpinus	Carpinus_grandis	deciduous	tree	unlobed	dentate	pinnate	non-looped	F	F	F	no	no	no	no	no	no	no
SNSD, MMG_PB	Sf._7892	1	1		Seifhennersdorf	Lower Oligocene	Betulaceae	Carpinus	Carpinus_grandis	deciduous	tree	unlobed	dentate	pinnate	non-looped	F	F	F	yes	yes	no	no	no	no	no	2
SNSD, MMG_PB	Sf._7902	1	1		Seifhennersdorf	Lower Oligocene	Betulaceae	Carpinus	Carpinus_grandis	deciduous	tree	unlobed	dentate	pinnate	non-looped	F	F	F	no	no	no	no	no	no	no
SNSD, MMG_PB	Sf._7920	1			Seifhennersdorf	Lower Oligocene	Betulaceae	Carpinus	Carpinus_grandis	deciduous	tree	unlobed	dentate	pinnate	non-looped	F	F	F	no	no	no	no	no	no	no
SNSD, MMG_PB	Sf._7935a	1			Seifhennersdorf	Lower Oligocene	Betulaceae	Carpinus	Carpinus_grandis	deciduous	tree	unlobed	dentate	pinnate	non-looped	F	F	F	no	no	no	no	no	no	no
SNSD, MMG_PB	Sf._7935b	1			Seifhennersdorf	Lower Oligocene	Betulaceae	Carpinus	Carpinus_grandis	deciduous	tree	unlobed	dentate	pinnate	non-looped	F	F	F	no	no	no	no	no	no	no
SNSD, MMG_PB	Sf._7971	1	1	1	Seifhennersdorf	Lower Oligocene	Betulaceae	Carpinus	Carpinus_grandis	deciduous	tree	unlobed	dentate	pinnate	non-looped	F	F	F	no	no	no	no	no	no	no
SNSD, MMG_PB	Sf._7972	1			Seifhennersdorf	Lower Oligocene	Betulaceae	Carpinus	Carpinus_grandis	deciduous	tree	unlobed	dentate	pinnate	non-looped	F	F	F	no	no	no	no	no	no	no
SNSD, MMG_PB	Sf._7973	1	1		Seifhennersdorf	Lower Oligocene	Betulaceae	Carpinus	Carpinus_grandis	deciduous	tree	unlobed	dentate	pinnate	non-looped	F	F	F	no	no	no	no	no	no	no
SNSD, MMG_PB	Sf._7974	1	1		Seifhennersdorf	Lower Oligocene	Betulaceae	Carpinus	Carpinus_grandis	deciduous	tree	unlobed	dentate	pinnate	non-looped	F	F	F	no	no	no	no	no	no	no
SNSD, MMG_PB	Sf._7975	1	1		Seifhennersdorf	Lower Oligocene	Betulaceae	Carpinus	Carpinus_grandis	deciduous	tree	unlobed	dentate	pinnate	non-looped	F	F	F	no	no	no	no	no	no	no
SNSD, MMG_PB	Sf._8100	1			Seifhennersdorf	Lower Oligocene	Betulaceae	Carpinus	Carpinus_grandis	deciduous	tree	unlobed	dentate	pinnate	non-looped	F	F	F	no	no	no	no	no	no	no
SNSD, MMG_PB	Sf._8101	1			Seifhennersdorf	Lower Oligocene	Betulaceae	Carpinus	Carpinus_grandis	deciduous	tree	unlobed	dentate	pinnate	non-looped	F	F	F	no	no	no	no	no	no	no
SNSD, MMG_PB	Sf._8109	1			Seifhennersdorf	Lower Oligocene	Betulaceae	Carpinus	Carpinus_grandis	deciduous	tree	unlobed	dentate	pinnate	non-looped	F	F	F	no	no	no	no	no	no	no
SNSD, MMG_PB	Sf._8110	1	1		Seifhennersdorf	Lower Oligocene	Betulaceae	Carpinus	Carpinus_grandis	deciduous	tree	unlobed	dentate	pinnate	non-looped	F	F	F	no	no	no	no	no	no	no
SNSD, MMG_PB	Sf._8112	1			Seifhennersdorf	Lower Oligocene	Betulaceae	Carpinus	Carpinus_grandis	deciduous	tree	unlobed	dentate	pinnate	non-looped	F	F	F	no	no	no	no	no	no	no
SNSD, MMG_PB	Sf._8113	1			Seifhennersdorf	Lower Oligocene	Betulaceae	Carpinus	Carpinus_grandis	deciduous	tree	unlobed	dentate	pinnate	non-looped	F	F	F	no	no	no	no	no	no	no
SNSD, MMG_PB	Sf._8114	1			Seifhennersdorf	Lower Oligocene	Betulaceae	Carpinus	Carpinus_grandis	deciduous	tree	unlobed	dentate	pinnate	non-looped	F	F	F	no	no	no	no	no	no	no
SNSD, MMG_PB	Sf._8122	1			Seifhennersdorf	Lower Oligocene	Betulaceae	Carpinus	Carpinus_grandis	deciduous	tree	unlobed	dentate	pinnate	non-looped	F	F	F	no	no	no	no	no	no	no
SNSD, MMG_PB	Sf._8127	1			Seifhennersdorf	Lower Oligocene	Betulaceae	Carpinus	Carpinus_grandis	deciduous	tree	unlobed	dentate	pinnate	non-looped	F	F	F	no	no	no	no	no	no	no
SNSD, MMG_PB	Sf._8152	1			Seifhennersdorf	Lower Oligocene	Betulaceae	Carpinus	Carpinus_grandis	deciduous	tree	unlobed	dentate	pinnate	non-looped	F	F	F	no	no	no	no	no	no	no
SNSD, MMG_PB	Sf._8153:1,2	1	1	1	Seifhennersdorf	Lower Oligocene	Betulaceae	Carpinus	Carpinus_grandis	deciduous	tree	unlobed	dentate	pinnate	non-looped	F	F	F	no	no	no	no	no	no	no
SNSD, MMG_PB	Sf._8160:1,2	1			Seifhennersdorf	Lower Oligocene	Betulaceae	Carpinus	Carpinus_grandis	deciduous	tree	unlobed	dentate	pinnate	non-looped	F	F	F	no	no	no	no	no	no	no
SNSD, MMG_PB	Sf._8182	1	1	1	Seifhennersdorf	Lower Oligocene	Betulaceae	Carpinus	Carpinus_grandis	deciduous	tree	unlobed	dentate	pinnate	non-looped	F	F	F	no	no	no	no	no	no	no
SNSD, MMG_PB	Sf._8193	1			Seifhennersdorf	Lower Oligocene	Betulaceae	Carpinus	Carpinus_grandis	deciduous	tree	unlobed	dentate	pinnate	non-looped	F	F	F	no	no	no	no	no	no	no
SNSD, MMG_PB	Sf._8265:1,2	1			Seifhennersdorf	Lower Oligocene	Betulaceae	Carpinus	Carpinus_grandis	deciduous	tree	unlobed	dentate	pinnate	non-looped	F	F	F	no	no	no	no	no	no	no
SNSD, MMG_PB	Sf._8266a	1	1		Seifhennersdorf	Lower Oligocene	Betulaceae	Carpinus	Carpinus_grandis	deciduous	tree	unlobed	dentate	pinnate	non-looped	F	F	F	no	no	no	no	no	no	no
SNSD, MMG_PB	Sf._8266b	1			Seifhennersdorf	Lower Oligocene	Betulaceae	Carpinus	Carpinus_grandis	deciduous	tree	unlobed	dentate	pinnate	non-looped	F	F	F	no	no	no	no	no	no	no
SNSD, MMG_PB	Sf._8296	1	1		Seifhennersdorf	Lower Oligocene	Betulaceae	Carpinus	Carpinus_grandis	deciduous	tree	unlobed	dentate	pinnate	non-looped	F	F	F	no	no	no	no	no	no	no
SNSD, MMG_PB	Sf._8300	1	1		Seifhennersdorf	Lower Oligocene	Betulaceae	Carpinus	Carpinus_grandis	deciduous	tree	unlobed	dentate	pinnate	non-looped	F	F	F	no	no	no	no	no	no	no
SNSD, MMG_PB	Sf._8301	1	1		Seifhennersdorf	Lower Oligocene	Betulaceae	Carpinus	Carpinus_grandis	deciduous	tree	unlobed	dentate	pinnate	non-looped	F	F	F	no	no	no	no	no	no	no
SNSD, MMG_PB	Sf._8302	1	1		Seifhennersdorf	Lower Oligocene	Betulaceae	Carpinus	Carpinus_grandis	deciduous	tree	unlobed	dentate	pinnate	non-looped	F	F	F	no	no	no	no	no	no	no
SNSD, MMG_PB	Sf._8305	1			Seifhennersdorf	Lower Oligocene	Betulaceae	Carpinus	Carpinus_grandis	deciduous	tree	unlobed	dentate	pinnate	non-looped	F	F	F	no	no	no	no	no	no	no
SNSD, MMG_PB	Sf._8412	1	1		Seifhennersdorf	Lower Oligocene	Betulaceae	Carpinus	Carpinus_grandis	deciduous	tree	unlobed	dentate	pinnate	non-looped	F	F	F	no	no	no	no	no	no	no
SNSD, MMG_PB	Sf._8434	1	1	1	Seifhennersdorf	Lower Oligocene	Betulaceae	Carpinus	Carpinus_grandis	deciduous	tree	unlobed	dentate	pinnate	non-looped	F	F	F	no	no	no	no	no	no	no
SNSD, MMG_PB	Sf._8447/4375a	1	1		Seifhennersdorf	Lower Oligocene	Betulaceae	Carpinus	Carpinus_grandis	deciduous	tree	unlobed	dentate	pinnate	non-looped	F	F	F	no	no	no	no	no	no	no
SNSD, MMG_PB	Sf._8458	1			Seifhennersdorf	Lower Oligocene	Betulaceae	Carpinus	Carpinus_grandis	deciduous	tree	unlobed	dentate	pinnate	non-looped	F	F	F	yes	yes	no	no	no	no	no	78
SNSD, MMG_PB	Sf._8460	1			Seifhennersdorf	Lower Oligocene	Betulaceae	Carpinus	Carpinus_grandis	deciduous	tree	unlobed	dentate	pinnate	non-looped	F	F	F	no	no	no	no	no	no	no
SNSD, MMG_PB	Sf._8463:1,2	1	1	1	Seifhennersdorf	Lower Oligocene	Betulaceae	Carpinus	Carpinus_grandis	deciduous	tree	unlobed	dentate	pinnate	non-looped	F	F	F	no	no	no	no	no	no	no
SNSD, MMG_PB	Sf._8465:1,2	1	1		Seifhennersdorf	Lower Oligocene	Betulaceae	Carpinus	Carpinus_grandis	deciduous	tree	unlobed	dentate	pinnate	non-looped	F	F	F	no	no	no	no	no	no	no
SNSD, MMG_PB	Sf._8468:1,2	1			Seifhennersdorf	Lower Oligocene	Betulaceae	Carpinus	Carpinus_grandis	deciduous	tree	unlobed	dentate	pinnate	non-looped	F	F	F	no	no	no	no	no	no	no
SNSD, MMG_PB	Sf._8472	1	1		Seifhennersdorf	Lower Oligocene	Betulaceae	Carpinus	Carpinus_grandis	deciduous	tree	unlobed	dentate	pinnate	non-looped	F	F	F	no	no	no	no	no	no	no
SNSD, MMG_PB	Sf._8475	1			Seifhennersdorf	Lower Oligocene	Betulaceae	Carpinus	Carpinus_grandis	deciduous	tree	unlobed	dentate	pinnate	non-looped	F	F	F	no	no	no	no	no	no	no
SNSD, MMG_PB	Sf._8476	1			Seifhennersdorf	Lower Oligocene	Betulaceae	Carpinus	Carpinus_grandis	deciduous	tree	unlobed	dentate	pinnate	non-looped	F	F	F	no	no	no	no	no	no	no
SNSD, MMG_PB	Sf._8477	1			Seifhennersdorf	Lower Oligocene	Betulaceae	Carpinus	Carpinus_grandis	deciduous	tree	unlobed	dentate	pinnate	non-looped	F	F	F	no	no	no	no	no	no	no
SNSD, MMG_PB	Sf._8489:1,2	1			Seifhennersdorf	Lower Oligocene	Betulaceae	Carpinus	Carpinus_grandis	deciduous	tree	unlobed	dentate	pinnate	non-looped	F	F	F	yes	no	yes	no	no	no	no	214
SNSD, MMG_PB	Sf._8497	1	1		Seifhennersdorf	Lower Oligocene	Betulaceae	Carpinus	Carpinus_grandis	deciduous	tree	unlobed	dentate	pinnate	non-looped	F	F	F	no	no	no	no	no	no	no
SNSD, MMG_PB	Sf._8498	1	1	1	Seifhennersdorf	Lower Oligocene	Betulaceae	Carpinus	Carpinus_grandis	deciduous	tree	unlobed	dentate	pinnate	non-looped	F	F	F	no	no	no	no	no	no	no
SNSD, MMG_PB	Sf._8500	1	1	1	Seifhennersdorf	Lower Oligocene	Betulaceae	Carpinus	Carpinus_grandis	deciduous	tree	unlobed	dentate	pinnate	non-looped	F	F	F	no	no	no	no	no	no	no
SNSD, MMG_PB	Sf._8501	1			Seifhennersdorf	Lower Oligocene	Betulaceae	Carpinus	Carpinus_grandis	deciduous	tree	unlobed	dentate	pinnate	non-looped	F	F	F	no	no	no	no	no	no	no
SNSD, MMG_PB	Sf._8503	1			Seifhennersdorf	Lower Oligocene	Betulaceae	Carpinus	Carpinus_grandis	deciduous	tree	unlobed	dentate	pinnate	non-looped	F	F	F	no	no	no	no	no	no	no
SNSD, MMG_PB	Sf._8504:1,2	1			Seifhennersdorf	Lower Oligocene	Betulaceae	Carpinus	Carpinus_grandis	deciduous	tree	unlobed	dentate	pinnate	non-looped	F	F	F	no	no	no	no	no	no	no
SNSD, MMG_PB	Sf._8505	1			Seifhennersdorf	Lower Oligocene	Betulaceae	Carpinus	Carpinus_grandis	deciduous	tree	unlobed	dentate	pinnate	non-looped	F	F	F	no	no	no	no	no	no	no
SNSD, MMG_PB	Sf._8508 (II)	1			Seifhennersdorf	Lower Oligocene	Betulaceae	Carpinus	Carpinus_grandis	deciduous	tree	unlobed	dentate	pinnate	non-looped	F	F	F	no	no	no	no	no	no	no
SNSD, MMG_PB	Sf._8508 (II)	1	1		Seifhennersdorf	Lower Oligocene	Betulaceae	Carpinus	Carpinus_grandis	deciduous	tree	unlobed	dentate	pinnate	non-looped	F	F	F	no	no	no	no	no	no	no
SNSD, MMG_PB	Sf._8509:1,2	1			Seifhennersdorf	Lower Oligocene	Betulaceae	Carpinus	Carpinus_grandis	deciduous	tree	unlobed	dentate	pinnate	non-looped	F	F	F	no	no	no	no	no	no	no
SNSD, MMG_PB	Sf._8510	1			Seifhennersdorf	Lower Oligocene	Betulaceae	Carpinus	Carpinus_grandis	deciduous	tree	unlobed	dentate	pinnate	non-looped	F	F	F	no	no	no	no	no	no	no
SNSD, MMG_PB	Sf._8512	1	1		Seifhennersdorf	Lower Oligocene	Betulaceae	Carpinus	Carpinus_grandis	deciduous	tree	unlobed	dentate	pinnate	non-looped	F	F	F	no	no	no	no	no	no	no
SNSD, MMG_PB	Sf._8514	1			Seifhennersdorf	Lower Oligocene	Betulaceae	Carpinus	Carpinus_grandis	deciduous	tree	unlobed	dentate	pinnate	non-looped	F	F	F	no	no	no	no	no	no	no
SNSD, MMG_PB	Sf._8515	1			Seifhennersdorf	Lower Oligocene	Betulaceae	Carpinus	Carpinus_grandis	deciduous	tree	unlobed	dentate	pinnate	non-looped	F	F	F	no	no	no	no	no	no	no
SNSD, MMG_PB	Sf._8516:1,2	1			Seifhennersdorf	Lower Oligocene	Betulaceae	Carpinus	Carpinus_grandis	deciduous	tree	unlobed	dentate	pinnate	non-looped	F	F	F	no	no	no	no	no	no	no
SNSD, MMG_PB	Sf._8517	1			Seifhennersdorf	Lower Oligocene	Betulaceae	Carpinus	Carpinus_grandis	deciduous	tree	unlobed	dentate	pinnate	non-looped	F	F	F	no	no	no	no	no	no	no
SNSD, MMG_PB	Sf._8520	1	1		Seifhennersdorf	Lower Oligocene	Betulaceae	Carpinus	Carpinus_grandis	deciduous	tree	unlobed	dentate	pinnate	non-looped	F	F	F	no	no	no	no	no	no	no
SNSD, MMG_PB	Sf._8524	1			Seifhennersdorf	Lower Oligocene	Betulaceae	Carpinus	Carpinus_grandis	deciduous	tree	unlobed	dentate	pinnate	non-looped	F	F	F	no	no	no	no	no	no	no
SNSD, MMG_PB	Sf._8526	1			Seifhennersdorf	Lower Oligocene	Betulaceae	Carpinus	Carpinus_grandis	deciduous	tree	unlobed	dentate	pinnate	non-looped	F	F	F	no	no	no	no	no	no	no
SNSD, MMG_PB	Sf._8527	1			Seifhennersdorf	Lower Oligocene	Betulaceae	Carpinus	Carpinus_grandis	deciduous	tree	unlobed	dentate	pinnate	non-looped	F	F	F	no	no	no	no	no	no	no
SNSD, MMG_PB	Sf._8528	1			Seifhennersdorf	Lower Oligocene	Betulaceae	Carpinus	Carpinus_grandis	deciduous	tree	unlobed	dentate	pinnate	non-looped	F	F	F	no	no	no	no	no	no	no
SNSD, MMG_PB	Sf._8529:1,2	1			Seifhennersdorf	Lower Oligocene	Betulaceae	Carpinus	Carpinus_grandis	deciduous	tree	unlobed	dentate	pinnate	non-looped	F	F	F	no	no	no	no	no	no	no
SNSD, MMG_PB	Sf._8533	1	1		Seifhennersdorf	Lower Oligocene	Betulaceae	Carpinus	Carpinus_grandis	deciduous	tree	unlobed	dentate	pinnate	non-looped	F	F	F	no	no	no	no	no	no	no
SNSD, MMG_PB	Sf._8534	1	1	1	Seifhennersdorf	Lower Oligocene	Betulaceae	Carpinus	Carpinus_grandis	deciduous	tree	unlobed	dentate	pinnate	non-looped	F	F	F	no	no	no	no	no	no	no
SNSD, MMG_PB	Sf._8536	1			Seifhennersdorf	Lower Oligocene	Betulaceae	Carpinus	Carpinus_grandis	deciduous	tree	unlobed	dentate	pinnate	non-looped	F	F	F	no	no	no	no	no	no	no
SNSD, MMG_PB	Sf._8537	1	1		Seifhennersdorf	Lower Oligocene	Betulaceae	Carpinus	Carpinus_grandis	deciduous	tree	unlobed	dentate	pinnate	non-looped	F	F	F	no	no	no	no	no	no	no
SNSD, MMG_PB	Sf._8538a	1	1		Seifhennersdorf	Lower Oligocene	Betulaceae	Carpinus	Carpinus_grandis	deciduous	tree	unlobed	dentate	pinnate	non-looped	F	F	F	no	no	no	no	no	no	no
SNSD, MMG_PB	Sf._8538b	1	1		Seifhennersdorf	Lower Oligocene	Betulaceae	Carpinus	Carpinus_grandis	deciduous	tree	unlobed	dentate	pinnate	non-looped	F	F	F	no	no	no	no	no	no	no
SNSD, MMG_PB	Sf._8539	1	1	1	Seifhennersdorf	Lower Oligocene	Betulaceae	Carpinus	Carpinus_grandis	deciduous	tree	unlobed	dentate	pinnate	non-looped	F	F	F	no	no	no	no	no	no	no
SNSD, MMG_PB	Sf._8541	1			Seifhennersdorf	Lower Oligocene	Betulaceae	Carpinus	Carpinus_grandis	deciduous	tree	unlobed	dentate	pinnate	non-looped	F	F	F	no	no	no	no	no	no	no
SNSD, MMG_PB	Sf._8542	1	1		Seifhennersdorf	Lower Oligocene	Betulaceae	Carpinus	Carpinus_grandis	deciduous	tree	unlobed	dentate	pinnate	non-looped	F	F	F	no	no	no	no	no	no	no
SNSD, MMG_PB	Sf._8564	1	1		Seifhennersdorf	Lower Oligocene	Betulaceae	Carpinus	Carpinus_grandis	deciduous	tree	unlobed	dentate	pinnate	non-looped	F	F	F	no	no	no	no	no	no	no
SNSD, MMG_PB	Sf._8566	1	1		Seifhennersdorf	Lower Oligocene	Betulaceae	Carpinus	Carpinus_grandis	deciduous	tree	unlobed	dentate	pinnate	non-looped	F	F	F	no	no	no	no	no	no	no
SNSD, MMG_PB	Sf._8567	1	1		Seifhennersdorf	Lower Oligocene	Betulaceae	Carpinus	Carpinus_grandis	deciduous	tree	unlobed	dentate	pinnate	non-looped	F	F	F	no	no	no	no	no	no	no
SNSD, MMG_PB	Sf._8568	1	1		Seifhennersdorf	Lower Oligocene	Betulaceae	Carpinus	Carpinus_grandis	deciduous	tree	unlobed	dentate	pinnate	non-looped	F	F	F	no	no	no	no	no	no	no
SNSD, MMG_PB	Sf._8569	1	1		Seifhennersdorf	Lower Oligocene	Betulaceae	Carpinus	Carpinus_grandis	deciduous	tree	unlobed	dentate	pinnate	non-looped	F	F	F	no	no	no	no	no	no	no
SNSD, MMG_PB	Sf._8571	1			Seifhennersdorf	Lower Oligocene	Betulaceae	Carpinus	Carpinus_grandis	deciduous	tree	unlobed	dentate	pinnate	non-looped	F	F	F	no	no	no	no	no	no	no
SNSD, MMG_PB	Sf._8572	1			Seifhennersdorf	Lower Oligocene	Betulaceae	Carpinus	Carpinus_grandis	deciduous	tree	unlobed	dentate	pinnate	non-looped	F	F	F	no	no	no	no	no	no	no
SNSD, MMG_PB	Sf._8588	1			Seifhennersdorf	Lower Oligocene	Betulaceae	Carpinus	Carpinus_grandis	deciduous	tree	unlobed	dentate	pinnate	non-looped	F	F	F	no	no	no	no	no	no	no
SNSD, MMG_PB	Sf._8589	1	1		Seifhennersdorf	Lower Oligocene	Betulaceae	Carpinus	Carpinus_grandis	deciduous	tree	unlobed	dentate	pinnate	non-looped	F	F	F	no	no	no	no	no	no	no
SNSD, MMG_PB	Sf._8590	1			Seifhennersdorf	Lower Oligocene	Betulaceae	Carpinus	Carpinus_grandis	deciduous	tree	unlobed	dentate	pinnate	non-looped	F	F	F	no	no	no	no	no	no	no
SNSD, MMG_PB	Sf._8595	1			Seifhennersdorf	Lower Oligocene	Betulaceae	Carpinus	Carpinus_grandis	deciduous	tree	unlobed	dentate	pinnate	non-looped	F	F	F	no	no	no	no	no	no	no
SNSD, MMG_PB	Sf._8602b	1			Seifhennersdorf	Lower Oligocene	Betulaceae	Carpinus	Carpinus_grandis	deciduous	tree	unlobed	dentate	pinnate	non-looped	F	F	F	no	no	no	no	no	no	no
SNSD, MMG_PB	Sf._8630	1	1	1	Seifhennersdorf	Lower Oligocene	Betulaceae	Carpinus	Carpinus_grandis	deciduous	tree	unlobed	dentate	pinnate	non-looped	F	F	F	no	no	no	no	no	no	no
SNSD, MMG_PB	Sf._8638	1	1		Seifhennersdorf	Lower Oligocene	Betulaceae	Carpinus	Carpinus_grandis	deciduous	tree	unlobed	dentate	pinnate	non-looped	F	F	F	no	no	no	no	no	no	no
SNSD, MMG_PB	Sf._8672 a	1			Seifhennersdorf	Lower Oligocene	Betulaceae	Carpinus	Carpinus_grandis	deciduous	tree	unlobed	dentate	pinnate	non-looped	F	F	F	no	no	no	no	no	no	no
SNSD, MMG_PB	Sf._8684	1			Seifhennersdorf	Lower Oligocene	Betulaceae	Carpinus	Carpinus_grandis	deciduous	tree	unlobed	dentate	pinnate	non-looped	F	F	F	no	no	no	no	no	no	no
SNSD, MMG_PB	Sf._8685	1			Seifhennersdorf	Lower Oligocene	Betulaceae	Carpinus	Carpinus_grandis	deciduous	tree	unlobed	dentate	pinnate	non-looped	F	F	F	no	no	no	no	no	no	no
SNSD, MMG_PB	Sf._8686	1	1		Seifhennersdorf	Lower Oligocene	Betulaceae	Carpinus	Carpinus_grandis	deciduous	tree	unlobed	dentate	pinnate	non-looped	F	F	F	no	no	no	no	no	no	no
SNSD, MMG_PB	Sf._8687	1			Seifhennersdorf	Lower Oligocene	Betulaceae	Carpinus	Carpinus_grandis	deciduous	tree	unlobed	dentate	pinnate	non-looped	F	F	F	yes	yes	no	no	no	no	no	2
SNSD, MMG_PB	Sf._8689	1	1		Seifhennersdorf	Lower Oligocene	Betulaceae	Carpinus	Carpinus_grandis	deciduous	tree	unlobed	dentate	pinnate	non-looped	F	F	F	no	no	no	no	no	no	no
SNSD, MMG_PB	Sf._4b	1	1	1	Seifhennersdorf	Lower Oligocene	Betulaceae	Carpinus	Carpinus_roscheri	deciduous	tree	unlobed	dentate	pinnate	non-looped	F	F	F	no	no	no	no	no	no	no
SNSD, MMG_PB	Sf._849	1			Seifhennersdorf	Lower Oligocene	Betulaceae	Carpinus	Carpinus_roscheri	deciduous	tree	unlobed	dentate	pinnate	non-looped	F	F	F	no	no	no	no	no	no	no
SNSD, MMG_PB	Sf._1169b	1			Seifhennersdorf	Lower Oligocene	Betulaceae	Carpinus	Carpinus_roscheri	deciduous	tree	unlobed	dentate	pinnate	non-looped	F	F	F	no	no	no	no	no	no	no
SNSD, MMG_PB	Sf._1360:1,2	1			Seifhennersdorf	Lower Oligocene	Betulaceae	Carpinus	Carpinus_roscheri	deciduous	tree	unlobed	dentate	pinnate	non-looped	F	F	F	no	no	no	no	no	no	no
SNSD, MMG_PB	Sf._1363	1	1		Seifhennersdorf	Lower Oligocene	Betulaceae	Carpinus	Carpinus_roscheri	deciduous	tree	unlobed	dentate	pinnate	non-looped	F	F	F	no	no	no	no	no	no	no
SNSD, MMG_PB	Sf._1364	1			Seifhennersdorf	Lower Oligocene	Betulaceae	Carpinus	Carpinus_roscheri	deciduous	tree	unlobed	dentate	pinnate	non-looped	F	F	F	no	no	no	no	no	no	no
SNSD, MMG_PB	Sf._1365	1			Seifhennersdorf	Lower Oligocene	Betulaceae	Carpinus	Carpinus_roscheri	deciduous	tree	unlobed	dentate	pinnate	non-looped	F	F	F	yes	no	yes	no	no	no	no	14
SNSD, MMG_PB	Sf._1367	1			Seifhennersdorf	Lower Oligocene	Betulaceae	Carpinus	Carpinus_roscheri	deciduous	tree	unlobed	dentate	pinnate	non-looped	F	F	F	no	no	no	no	no	no	no
SNSD, MMG_PB	Sf._1377	1	1		Seifhennersdorf	Lower Oligocene	Betulaceae	Carpinus	Carpinus_roscheri	deciduous	tree	unlobed	dentate	pinnate	non-looped	F	F	F	no	no	no	no	no	no	no
SNSD, MMG_PB	Sf._1379	1			Seifhennersdorf	Lower Oligocene	Betulaceae	Carpinus	Carpinus_roscheri	deciduous	tree	unlobed	dentate	pinnate	non-looped	F	F	F	no	no	no	no	no	no	no
SNSD, MMG_PB	Sf._1506:1,2	1			Seifhennersdorf	Lower Oligocene	Betulaceae	Carpinus	Carpinus_roscheri	deciduous	tree	unlobed	dentate	pinnate	non-looped	F	F	F	no	no	no	no	no	no	no
SNSD, MMG_PB	Sf._1511	1	1		Seifhennersdorf	Lower Oligocene	Betulaceae	Carpinus	Carpinus_roscheri	deciduous	tree	unlobed	dentate	pinnate	non-looped	F	F	F	no	no	no	no	no	no	no
SNSD, MMG_PB	Sf._1538	1			Seifhennersdorf	Lower Oligocene	Betulaceae	Carpinus	Carpinus_roscheri	deciduous	tree	unlobed	dentate	pinnate	non-looped	F	F	F	no	no	no	no	no	no	no
SNSD, MMG_PB	Sf._1540	1	1	1	Seifhennersdorf	Lower Oligocene	Betulaceae	Carpinus	Carpinus_roscheri	deciduous	tree	unlobed	dentate	pinnate	non-looped	F	F	F	no	no	no	no	no	no	no
SNSD, MMG_PB	Sf._1542	1	1		Seifhennersdorf	Lower Oligocene	Betulaceae	Carpinus	Carpinus_roscheri	deciduous	tree	unlobed	dentate	pinnate	non-looped	F	F	F	no	no	no	no	no	no	no
SNSD, MMG_PB	Sf._1543	1			Seifhennersdorf	Lower Oligocene	Betulaceae	Carpinus	Carpinus_roscheri	deciduous	tree	unlobed	dentate	pinnate	non-looped	F	F	F	no	no	no	no	no	no	no
SNSD, MMG_PB	Sf._1551	1			Seifhennersdorf	Lower Oligocene	Betulaceae	Carpinus	Carpinus_roscheri	deciduous	tree	unlobed	dentate	pinnate	non-looped	F	F	F	no	no	no	no	no	no	no
SNSD, MMG_PB	Sf._1554	1	1	1	Seifhennersdorf	Lower Oligocene	Betulaceae	Carpinus	Carpinus_roscheri	deciduous	tree	unlobed	dentate	pinnate	non-looped	F	F	F	no	no	no	no	no	no	no
SNSD, MMG_PB	Sf._1574	1	1		Seifhennersdorf	Lower Oligocene	Betulaceae	Carpinus	Carpinus_roscheri	deciduous	tree	unlobed	dentate	pinnate	non-looped	F	F	F	no	no	no	no	no	no	no
SNSD, MMG_PB	Sf._1586 (II)	1	1	1	Seifhennersdorf	Lower Oligocene	Betulaceae	Carpinus	Carpinus_roscheri	deciduous	tree	unlobed	dentate	pinnate	non-looped	F	F	F	yes	yes	no	no	no	no	no	5	57
SNSD, MMG_PB	Sf._1597	1	1		Seifhennersdorf	Lower Oligocene	Betulaceae	Carpinus	Carpinus_roscheri	deciduous	tree	unlobed	dentate	pinnate	non-looped	F	F	F	no	no	no	no	no	no	no
SNSD, MMG_PB	Sf._1602	1			Seifhennersdorf	Lower Oligocene	Betulaceae	Carpinus	Carpinus_roscheri	deciduous	tree	unlobed	dentate	pinnate	non-looped	F	F	F	no	no	no	no	no	no	no
SNSD, MMG_PB	Sf._1609 (II)	1			Seifhennersdorf	Lower Oligocene	Betulaceae	Carpinus	Carpinus_roscheri	deciduous	tree	unlobed	dentate	pinnate	non-looped	F	F	F	yes	yes	no	no	no	no	no	2
SNSD, MMG_PB	Sf._1616 (II)	1	1	1	Seifhennersdorf	Lower Oligocene	Betulaceae	Carpinus	Carpinus_roscheri	deciduous	tree	unlobed	dentate	pinnate	non-looped	F	F	F	yes	yes	yes	no	no	no	no	57	214
SNSD, MMG_PB	Sf._1619 (II)	1			Seifhennersdorf	Lower Oligocene	Betulaceae	Carpinus	Carpinus_roscheri	deciduous	tree	unlobed	dentate	pinnate	non-looped	F	F	F	no	no	no	no	no	no	no
SNSD, MMG_PB	Sf._1647	1			Seifhennersdorf	Lower Oligocene	Betulaceae	Carpinus	Carpinus_roscheri	deciduous	tree	unlobed	dentate	pinnate	non-looped	F	F	F	no	no	no	no	no	no	no
SNSD, MMG_PB	Sf._1652 (II)	1			Seifhennersdorf	Lower Oligocene	Betulaceae	Carpinus	Carpinus_roscheri	deciduous	tree	unlobed	dentate	pinnate	non-looped	F	F	F	no	no	no	no	no	no	no
SNSD, MMG_PB	Sf._1655 (II)	1			Seifhennersdorf	Lower Oligocene	Betulaceae	Carpinus	Carpinus_roscheri	deciduous	tree	unlobed	dentate	pinnate	non-looped	F	F	F	no	no	no	no	no	no	no
SNSD, MMG_PB	Sf._1678	1	1		Seifhennersdorf	Lower Oligocene	Betulaceae	Carpinus	Carpinus_roscheri	deciduous	tree	unlobed	dentate	pinnate	non-looped	F	F	F	no	no	no	no	no	no	no
SNSD, MMG_PB	Sf._1682 (II)	1	1		Seifhennersdorf	Lower Oligocene	Betulaceae	Carpinus	Carpinus_roscheri	deciduous	tree	unlobed	dentate	pinnate	non-looped	F	F	F	yes	yes	yes	no	no	no	no	3	12
SNSD, MMG_PB	Sf._1685	1			Seifhennersdorf	Lower Oligocene	Betulaceae	Carpinus	Carpinus_roscheri	deciduous	tree	unlobed	dentate	pinnate	non-looped	F	F	F	no	no	no	no	no	no	no
SNSD, MMG_PB	Sf._1698 (II)	1			Seifhennersdorf	Lower Oligocene	Betulaceae	Carpinus	Carpinus_roscheri	deciduous	tree	unlobed	dentate	pinnate	non-looped	F	F	F	no	no	no	no	no	no	no
SNSD, MMG_PB	Sf._1721	1			Seifhennersdorf	Lower Oligocene	Betulaceae	Carpinus	Carpinus_roscheri	deciduous	tree	unlobed	dentate	pinnate	non-looped	F	F	F	no	no	no	no	no	no	no
SNSD, MMG_PB	Sf._1746a	1			Seifhennersdorf	Lower Oligocene	Betulaceae	Carpinus	Carpinus_roscheri	deciduous	tree	unlobed	dentate	pinnate	non-looped	F	F	F	no	no	no	no	no	no	no
SNSD, MMG_PB	Sf._1752	1			Seifhennersdorf	Lower Oligocene	Betulaceae	Carpinus	Carpinus_roscheri	deciduous	tree	unlobed	dentate	pinnate	non-looped	F	F	F	yes	no	yes	no	no	no	no	12
SNSD, MMG_PB	Sf._1764	1			Seifhennersdorf	Lower Oligocene	Betulaceae	Carpinus	Carpinus_roscheri	deciduous	tree	unlobed	dentate	pinnate	non-looped	F	F	F	no	no	no	no	no	no	no
SNSD, MMG_PB	Sf._1777	1	1		Seifhennersdorf	Lower Oligocene	Betulaceae	Carpinus	Carpinus_roscheri	deciduous	tree	unlobed	dentate	pinnate	non-looped	F	F	F	no	no	no	no	no	no	no
SNSD, MMG_PB	Sf._1783	1			Seifhennersdorf	Lower Oligocene	Betulaceae	Carpinus	Carpinus_roscheri	deciduous	tree	unlobed	dentate	pinnate	non-looped	F	F	F	no	no	no	no	no	no	no
SNSD, MMG_PB	Sf._1789	1			Seifhennersdorf	Lower Oligocene	Betulaceae	Carpinus	Carpinus_roscheri	deciduous	tree	unlobed	dentate	pinnate	non-looped	F	F	F	no	no	no	no	no	no	no
SNSD, MMG_PB	Sf._1791	1	1		Seifhennersdorf	Lower Oligocene	Betulaceae	Carpinus	Carpinus_roscheri	deciduous	tree	unlobed	dentate	pinnate	non-looped	F	F	F	no	no	no	no	no	no	no
SNSD, MMG_PB	Sf._1801	1			Seifhennersdorf	Lower Oligocene	Betulaceae	Carpinus	Carpinus_roscheri	deciduous	tree	unlobed	dentate	pinnate	non-looped	F	F	F	no	no	no	no	no	no	no
SNSD, MMG_PB	Sf._1813	1			Seifhennersdorf	Lower Oligocene	Betulaceae	Carpinus	Carpinus_roscheri	deciduous	tree	unlobed	dentate	pinnate	non-looped	F	F	F	no	no	no	no	no	no	no
SNSD, MMG_PB	Sf._1829:1,2	1			Seifhennersdorf	Lower Oligocene	Betulaceae	Carpinus	Carpinus_roscheri	deciduous	tree	unlobed	dentate	pinnate	non-looped	F	F	F	no	no	no	no	no	no	no
SNSD, MMG_PB	Sf._1836:1,2	1			Seifhennersdorf	Lower Oligocene	Betulaceae	Carpinus	Carpinus_roscheri	deciduous	tree	unlobed	dentate	pinnate	non-looped	F	F	F	no	no	no	no	no	no	no
SNSD, MMG_PB	Sf._1838:1,2	1			Seifhennersdorf	Lower Oligocene	Betulaceae	Carpinus	Carpinus_roscheri	deciduous	tree	unlobed	dentate	pinnate	non-looped	F	F	F	no	no	no	no	no	no	no
SNSD, MMG_PB	Sf._1842	1			Seifhennersdorf	Lower Oligocene	Betulaceae	Carpinus	Carpinus_roscheri	deciduous	tree	unlobed	dentate	pinnate	non-looped	F	F	F	no	no	no	no	no	no	no
SNSD, MMG_PB	Sf._1847	1			Seifhennersdorf	Lower Oligocene	Betulaceae	Carpinus	Carpinus_roscheri	deciduous	tree	unlobed	dentate	pinnate	non-looped	F	F	F	no	no	no	no	no	no	no
SNSD, MMG_PB	Sf._1852	1			Seifhennersdorf	Lower Oligocene	Betulaceae	Carpinus	Carpinus_roscheri	deciduous	tree	unlobed	dentate	pinnate	non-looped	F	F	F	yes	yes	no	no	no	no	no	1
SNSD, MMG_PB	Sf._1858	1			Seifhennersdorf	Lower Oligocene	Betulaceae	Carpinus	Carpinus_roscheri	deciduous	tree	unlobed	dentate	pinnate	non-looped	F	F	F	no	no	no	no	no	no	no
SNSD, MMG_PB	Sf._1867	1			Seifhennersdorf	Lower Oligocene	Betulaceae	Carpinus	Carpinus_roscheri	deciduous	tree	unlobed	dentate	pinnate	non-looped	F	F	F	no	no	no	no	no	no	no
SNSD, MMG_PB	Sf._1882	1			Seifhennersdorf	Lower Oligocene	Betulaceae	Carpinus	Carpinus_roscheri	deciduous	tree	unlobed	dentate	pinnate	non-looped	F	F	F	no	no	no	no	no	no	no
SNSD, MMG_PB	Sf._1926	1			Seifhennersdorf	Lower Oligocene	Betulaceae	Carpinus	Carpinus_roscheri	deciduous	tree	unlobed	dentate	pinnate	non-looped	F	F	F	no	no	no	no	no	no	no
SNSD, MMG_PB	Sf._1941	1			Seifhennersdorf	Lower Oligocene	Betulaceae	Carpinus	Carpinus_roscheri	deciduous	tree	unlobed	dentate	pinnate	non-looped	F	F	F	no	no	no	no	no	no	no
SNSD, MMG_PB	Sf._1943	1	1		Seifhennersdorf	Lower Oligocene	Betulaceae	Carpinus	Carpinus_roscheri	deciduous	tree	unlobed	dentate	pinnate	non-looped	F	F	F	no	no	no	no	no	no	no
SNSD, MMG_PB	Sf._1963	1			Seifhennersdorf	Lower Oligocene	Betulaceae	Carpinus	Carpinus_roscheri	deciduous	tree	unlobed	dentate	pinnate	non-looped	F	F	F	no	no	no	no	no	no	no
SNSD, MMG_PB	Sf._1964	1			Seifhennersdorf	Lower Oligocene	Betulaceae	Carpinus	Carpinus_roscheri	deciduous	tree	unlobed	dentate	pinnate	non-looped	F	F	F	no	no	no	no	no	no	no
SNSD, MMG_PB	Sf._1970	1			Seifhennersdorf	Lower Oligocene	Betulaceae	Carpinus	Carpinus_roscheri	deciduous	tree	unlobed	dentate	pinnate	non-looped	F	F	F	no	no	no	no	no	no	no
SNSD, MMG_PB	Sf._1971	1	1		Seifhennersdorf	Lower Oligocene	Betulaceae	Carpinus	Carpinus_roscheri	deciduous	tree	unlobed	dentate	pinnate	non-looped	F	F	F	no	no	no	no	no	no	no
SNSD, MMG_PB	Sf._1976	1	1	1	Seifhennersdorf	Lower Oligocene	Betulaceae	Carpinus	Carpinus_roscheri	deciduous	tree	unlobed	dentate	pinnate	non-looped	F	F	F	no	no	no	no	no	no	no
SNSD, MMG_PB	Sf._1995	1	1		Seifhennersdorf	Lower Oligocene	Betulaceae	Carpinus	Carpinus_roscheri	deciduous	tree	unlobed	dentate	pinnate	non-looped	F	F	F	no	no	no	no	no	no	no
SNSD, MMG_PB	Sf._2009 b	1			Seifhennersdorf	Lower Oligocene	Betulaceae	Carpinus	Carpinus_roscheri	deciduous	tree	unlobed	dentate	pinnate	non-looped	F	F	F	no	no	no	no	no	no	no
SNSD, MMG_PB	Sf._2018	1	1		Seifhennersdorf	Lower Oligocene	Betulaceae	Carpinus	Carpinus_roscheri	deciduous	tree	unlobed	dentate	pinnate	non-looped	F	F	F	yes	yes	no	no	no	no	no	2
SNSD, MMG_PB	Sf._2020	1			Seifhennersdorf	Lower Oligocene	Betulaceae	Carpinus	Carpinus_roscheri	deciduous	tree	unlobed	dentate	pinnate	non-looped	F	F	F	no	no	no	no	no	no	no
SNSD, MMG_PB	Sf._2023	1	1	1	Seifhennersdorf	Lower Oligocene	Betulaceae	Carpinus	Carpinus_roscheri	deciduous	tree	unlobed	dentate	pinnate	non-looped	F	F	F	no	no	no	no	no	no	no
SNSD, MMG_PB	Sf._2024	1	1		Seifhennersdorf	Lower Oligocene	Betulaceae	Carpinus	Carpinus_roscheri	deciduous	tree	unlobed	dentate	pinnate	non-looped	F	F	F	no	no	no	no	no	no	no
SNSD, MMG_PB	Sf._2028	1			Seifhennersdorf	Lower Oligocene	Betulaceae	Carpinus	Carpinus_roscheri	deciduous	tree	unlobed	dentate	pinnate	non-looped	F	F	F	no	no	no	no	no	no	no
SNSD, MMG_PB	Sf._2029	1	1		Seifhennersdorf	Lower Oligocene	Betulaceae	Carpinus	Carpinus_roscheri	deciduous	tree	unlobed	dentate	pinnate	non-looped	F	F	F	no	no	no	no	no	no	no
SNSD, MMG_PB	Sf._2056	1			Seifhennersdorf	Lower Oligocene	Betulaceae	Carpinus	Carpinus_roscheri	deciduous	tree	unlobed	dentate	pinnate	non-looped	F	F	F	no	no	no	no	no	no	no
SNSD, MMG_PB	Sf._2059	1			Seifhennersdorf	Lower Oligocene	Betulaceae	Carpinus	Carpinus_roscheri	deciduous	tree	unlobed	dentate	pinnate	non-looped	F	F	F	no	no	no	no	no	no	no
SNSD, MMG_PB	Sf._2068	1			Seifhennersdorf	Lower Oligocene	Betulaceae	Carpinus	Carpinus_roscheri	deciduous	tree	unlobed	dentate	pinnate	non-looped	F	F	F	no	no	no	no	no	no	no
SNSD, MMG_PB	Sf._2087	1			Seifhennersdorf	Lower Oligocene	Betulaceae	Carpinus	Carpinus_roscheri	deciduous	tree	unlobed	dentate	pinnate	non-looped	F	F	F	no	no	no	no	no	no	no
SNSD, MMG_PB	Sf._2091	1			Seifhennersdorf	Lower Oligocene	Betulaceae	Carpinus	Carpinus_roscheri	deciduous	tree	unlobed	dentate	pinnate	non-looped	F	F	F	no	no	no	no	no	no	no
SNSD, MMG_PB	Sf._2099	1			Seifhennersdorf	Lower Oligocene	Betulaceae	Carpinus	Carpinus_roscheri	deciduous	tree	unlobed	dentate	pinnate	non-looped	F	F	F	no	no	no	no	no	no	no
SNSD, MMG_PB	Sf._2112	1	1		Seifhennersdorf	Lower Oligocene	Betulaceae	Carpinus	Carpinus_roscheri	deciduous	tree	unlobed	dentate	pinnate	non-looped	F	F	F	no	no	no	no	no	no	no
SNSD, MMG_PB	Sf._2121	1	1		Seifhennersdorf	Lower Oligocene	Betulaceae	Carpinus	Carpinus_roscheri	deciduous	tree	unlobed	dentate	pinnate	non-looped	F	F	F	no	no	no	no	no	no	no
SNSD, MMG_PB	Sf._2125	1			Seifhennersdorf	Lower Oligocene	Betulaceae	Carpinus	Carpinus_roscheri	deciduous	tree	unlobed	dentate	pinnate	non-looped	F	F	F	no	no	no	no	no	no	no
SNSD, MMG_PB	Sf._2128	1			Seifhennersdorf	Lower Oligocene	Betulaceae	Carpinus	Carpinus_roscheri	deciduous	tree	unlobed	dentate	pinnate	non-looped	F	F	F	no	no	no	no	no	no	no
SNSD, MMG_PB	Sf._2136	1	1		Seifhennersdorf	Lower Oligocene	Betulaceae	Carpinus	Carpinus_roscheri	deciduous	tree	unlobed	dentate	pinnate	non-looped	F	F	F	no	no	no	no	no	no	no
SNSD, MMG_PB	Sf._2156	1	1		Seifhennersdorf	Lower Oligocene	Betulaceae	Carpinus	Carpinus_roscheri	deciduous	tree	unlobed	dentate	pinnate	non-looped	F	F	F	no	no	no	no	no	no	no
SNSD, MMG_PB	Sf._2162	1	1	1	Seifhennersdorf	Lower Oligocene	Betulaceae	Carpinus	Carpinus_roscheri	deciduous	tree	unlobed	dentate	pinnate	non-looped	F	F	F	no	no	no	no	no	no	no
SNSD, MMG_PB	Sf._2164	1	1		Seifhennersdorf	Lower Oligocene	Betulaceae	Carpinus	Carpinus_roscheri	deciduous	tree	unlobed	dentate	pinnate	non-looped	F	F	F	no	no	no	no	no	no	no
SNSD, MMG_PB	Sf._2166	1			Seifhennersdorf	Lower Oligocene	Betulaceae	Carpinus	Carpinus_roscheri	deciduous	tree	unlobed	dentate	pinnate	non-looped	F	F	F	no	no	no	no	no	no	no
SNSD, MMG_PB	Sf._2177/2205	1	1		Seifhennersdorf	Lower Oligocene	Betulaceae	Carpinus	Carpinus_roscheri	deciduous	tree	unlobed	dentate	pinnate	non-looped	F	F	F	no	no	no	no	no	no	no
SNSD, MMG_PB	Sf._2188	1			Seifhennersdorf	Lower Oligocene	Betulaceae	Carpinus	Carpinus_roscheri	deciduous	tree	unlobed	dentate	pinnate	non-looped	F	F	F	no	no	no	no	no	no	no
SNSD, MMG_PB	Sf._2345	1	1		Seifhennersdorf	Lower Oligocene	Betulaceae	Carpinus	Carpinus_roscheri	deciduous	tree	unlobed	dentate	pinnate	non-looped	F	F	F	no	no	no	no	no	no	no
SNSD, MMG_PB	Sf._2811	1			Seifhennersdorf	Lower Oligocene	Betulaceae	Carpinus	Carpinus_roscheri	deciduous	tree	unlobed	dentate	pinnate	non-looped	F	F	F	no	no	no	no	no	no	no
SNSD, MMG_PB	Sf._3326	1			Seifhennersdorf	Lower Oligocene	Betulaceae	Carpinus	Carpinus_roscheri	deciduous	tree	unlobed	dentate	pinnate	non-looped	F	F	F	no	no	no	no	no	no	no
SNSD, MMG_PB	Sf._3328	1			Seifhennersdorf	Lower Oligocene	Betulaceae	Carpinus	Carpinus_roscheri	deciduous	tree	unlobed	dentate	pinnate	non-looped	F	F	F	no	no	no	no	no	no	no
SNSD, MMG_PB	Sf._3398:1,2	1			Seifhennersdorf	Lower Oligocene	Betulaceae	Carpinus	Carpinus_roscheri	deciduous	tree	unlobed	dentate	pinnate	non-looped	F	F	F	no	no	no	no	no	no	no
SNSD, MMG_PB	Sf._3416	1			Seifhennersdorf	Lower Oligocene	Betulaceae	Carpinus	Carpinus_roscheri	deciduous	tree	unlobed	dentate	pinnate	non-looped	F	F	F	yes	no	yes	no	no	no	no	12
SNSD, MMG_PB	Sf._3455:1,2	1	1		Seifhennersdorf	Lower Oligocene	Betulaceae	Carpinus	Carpinus_roscheri	deciduous	tree	unlobed	dentate	pinnate	non-looped	F	F	F	yes	yes	no	no	no	no	no	78
SNSD, MMG_PB	Sf._3460	1			Seifhennersdorf	Lower Oligocene	Betulaceae	Carpinus	Carpinus_roscheri	deciduous	tree	unlobed	dentate	pinnate	non-looped	F	F	F	no	no	no	no	no	no	no
SNSD, MMG_PB	Sf._3461	1			Seifhennersdorf	Lower Oligocene	Betulaceae	Carpinus	Carpinus_roscheri	deciduous	tree	unlobed	dentate	pinnate	non-looped	F	F	F	no	no	no	no	no	no	no
SNSD, MMG_PB	Sf._3506:1,2	1	1	1	Seifhennersdorf	Lower Oligocene	Betulaceae	Carpinus	Carpinus_roscheri	deciduous	tree	unlobed	dentate	pinnate	non-looped	F	F	F	no	no	no	no	no	no	no
SNSD, MMG_PB	Sf._3509:1,2	1	1	1	Seifhennersdorf	Lower Oligocene	Betulaceae	Carpinus	Carpinus_roscheri	deciduous	tree	unlobed	dentate	pinnate	non-looped	F	F	F	no	no	no	no	no	no	no
SNSD, MMG_PB	Sf._3523	1			Seifhennersdorf	Lower Oligocene	Betulaceae	Carpinus	Carpinus_roscheri	deciduous	tree	unlobed	dentate	pinnate	non-looped	F	F	F	no	no	no	no	no	no	no
SNSD, MMG_PB	Sf._3528	1			Seifhennersdorf	Lower Oligocene	Betulaceae	Carpinus	Carpinus_roscheri	deciduous	tree	unlobed	dentate	pinnate	non-looped	F	F	F	no	no	no	no	no	no	no
SNSD, MMG_PB	Sf._3530:1,2	1			Seifhennersdorf	Lower Oligocene	Betulaceae	Carpinus	Carpinus_roscheri	deciduous	tree	unlobed	dentate	pinnate	non-looped	F	F	F	no	no	no	no	no	no	no
SNSD, MMG_PB	Sf._3550	1			Seifhennersdorf	Lower Oligocene	Betulaceae	Carpinus	Carpinus_roscheri	deciduous	tree	unlobed	dentate	pinnate	non-looped	F	F	F	no	no	no	no	no	no	no
SNSD, MMG_PB	Sf._3555	1			Seifhennersdorf	Lower Oligocene	Betulaceae	Carpinus	Carpinus_roscheri	deciduous	tree	unlobed	dentate	pinnate	non-looped	F	F	F	no	no	no	no	no	no	no
SNSD, MMG_PB	Sf._3557b	1			Seifhennersdorf	Lower Oligocene	Betulaceae	Carpinus	Carpinus_roscheri	deciduous	tree	unlobed	dentate	pinnate	non-looped	F	F	F	no	no	no	no	no	no	no
SNSD, MMG_PB	Sf._3568	1	1		Seifhennersdorf	Lower Oligocene	Betulaceae	Carpinus	Carpinus_roscheri	deciduous	tree	unlobed	dentate	pinnate	non-looped	F	F	F	no	no	no	no	no	no	no
SNSD, MMG_PB	Sf._3580	1			Seifhennersdorf	Lower Oligocene	Betulaceae	Carpinus	Carpinus_roscheri	deciduous	tree	unlobed	dentate	pinnate	non-looped	F	F	F	no	no	no	no	no	no	no
SNSD, MMG_PB	Sf._3745	1	1	1	Seifhennersdorf	Lower Oligocene	Betulaceae	Carpinus	Carpinus_roscheri	deciduous	tree	unlobed	dentate	pinnate	non-looped	F	F	F	no	no	no	no	no	no	no
SNSD, MMG_PB	Sf._4018	1			Seifhennersdorf	Lower Oligocene	Betulaceae	Carpinus	Carpinus_roscheri	deciduous	tree	unlobed	dentate	pinnate	non-looped	F	F	F	no	no	no	no	no	no	no
SNSD, MMG_PB	Sf._4067 (II)	1			Seifhennersdorf	Lower Oligocene	Betulaceae	Carpinus	Carpinus_roscheri	deciduous	tree	unlobed	dentate	pinnate	non-looped	F	F	F	no	no	no	no	no	no	no
SNSD, MMG_PB	Sf._4098:1,2	1	1		Seifhennersdorf	Lower Oligocene	Betulaceae	Carpinus	Carpinus_roscheri	deciduous	tree	unlobed	dentate	pinnate	non-looped	F	F	F	no	no	no	no	no	no	no
SNSD, MMG_PB	Sf._4099:1,2	1	1		Seifhennersdorf	Lower Oligocene	Betulaceae	Carpinus	Carpinus_roscheri	deciduous	tree	unlobed	dentate	pinnate	non-looped	F	F	F	no	no	no	no	no	no	no
SNSD, MMG_PB	Sf._4104:1,2	1			Seifhennersdorf	Lower Oligocene	Betulaceae	Carpinus	Carpinus_roscheri	deciduous	tree	unlobed	dentate	pinnate	non-looped	F	F	F	no	no	no	no	no	no	no
SNSD, MMG_PB	Sf._4154:1,2	1			Seifhennersdorf	Lower Oligocene	Betulaceae	Carpinus	Carpinus_roscheri	deciduous	tree	unlobed	dentate	pinnate	non-looped	F	F	F	no	no	no	no	no	no	no
SNSD, MMG_PB	Sf._4190	1	1		Seifhennersdorf	Lower Oligocene	Betulaceae	Carpinus	Carpinus_roscheri	deciduous	tree	unlobed	dentate	pinnate	non-looped	F	F	F	no	no	no	no	no	no	no
SNSD, MMG_PB	Sf._4199	1	1		Seifhennersdorf	Lower Oligocene	Betulaceae	Carpinus	Carpinus_roscheri	deciduous	tree	unlobed	dentate	pinnate	non-looped	F	F	F	no	no	no	no	no	no	no
SNSD, MMG_PB	Sf._4218	1			Seifhennersdorf	Lower Oligocene	Betulaceae	Carpinus	Carpinus_roscheri	deciduous	tree	unlobed	dentate	pinnate	non-looped	F	F	F	no	no	no	no	no	no	no
SNSD, MMG_PB	Sf._4220:1,2	1			Seifhennersdorf	Lower Oligocene	Betulaceae	Carpinus	Carpinus_roscheri	deciduous	tree	unlobed	dentate	pinnate	non-looped	F	F	F	no	no	no	no	no	no	no
SNSD, MMG_PB	Sf._4242:1,2	1	1	1	Seifhennersdorf	Lower Oligocene	Betulaceae	Carpinus	Carpinus_roscheri	deciduous	tree	unlobed	dentate	pinnate	non-looped	F	F	F	no	no	no	no	no	no	no
SNSD, MMG_PB	Sf._4249:1,2	1			Seifhennersdorf	Lower Oligocene	Betulaceae	Carpinus	Carpinus_roscheri	deciduous	tree	unlobed	dentate	pinnate	non-looped	F	F	F	no	no	no	no	no	no	no
SNSD, MMG_PB	Sf._4250:1,2	1			Seifhennersdorf	Lower Oligocene	Betulaceae	Carpinus	Carpinus_roscheri	deciduous	tree	unlobed	dentate	pinnate	non-looped	F	F	F	no	no	no	no	no	no	no
SNSD, MMG_PB	Sf._4256:1,2	1			Seifhennersdorf	Lower Oligocene	Betulaceae	Carpinus	Carpinus_roscheri	deciduous	tree	unlobed	dentate	pinnate	non-looped	F	F	F	no	no	no	no	no	no	no
SNSD, MMG_PB	Sf._4308	1			Seifhennersdorf	Lower Oligocene	Betulaceae	Carpinus	Carpinus_roscheri	deciduous	tree	unlobed	dentate	pinnate	non-looped	F	F	F	no	no	no	no	no	no	no
SNSD, MMG_PB	Sf._4359	1			Seifhennersdorf	Lower Oligocene	Betulaceae	Carpinus	Carpinus_roscheri	deciduous	tree	unlobed	dentate	pinnate	non-looped	F	F	F	no	no	no	no	no	no	no
SNSD, MMG_PB	Sf._4364:1,2	1			Seifhennersdorf	Lower Oligocene	Betulaceae	Carpinus	Carpinus_roscheri	deciduous	tree	unlobed	dentate	pinnate	non-looped	F	F	F	no	no	no	no	no	no	no
SNSD, MMG_PB	Sf._4738:1,2	1	1		Seifhennersdorf	Lower Oligocene	Betulaceae	Carpinus	Carpinus_roscheri	deciduous	tree	unlobed	dentate	pinnate	non-looped	F	F	F	no	no	no	no	no	no	no
SNSD, MMG_PB	Sf._4740:1,2	1	1		Seifhennersdorf	Lower Oligocene	Betulaceae	Carpinus	Carpinus_roscheri	deciduous	tree	unlobed	dentate	pinnate	non-looped	F	F	F	no	no	no	no	no	no	no
SNSD, MMG_PB	Sf._4741:1,2	1			Seifhennersdorf	Lower Oligocene	Betulaceae	Carpinus	Carpinus_roscheri	deciduous	tree	unlobed	dentate	pinnate	non-looped	F	F	F	no	no	no	no	no	no	no
SNSD, MMG_PB	Sf._4744	1	1		Seifhennersdorf	Lower Oligocene	Betulaceae	Carpinus	Carpinus_roscheri	deciduous	tree	unlobed	dentate	pinnate	non-looped	F	F	F	no	no	no	no	no	no	no
SNSD, MMG_PB	Sf._4745:1,2	1	1		Seifhennersdorf	Lower Oligocene	Betulaceae	Carpinus	Carpinus_roscheri	deciduous	tree	unlobed	dentate	pinnate	non-looped	F	F	F	yes	yes	no	no	no	no	no	78
SNSD, MMG_PB	Sf._4747	1	1		Seifhennersdorf	Lower Oligocene	Betulaceae	Carpinus	Carpinus_roscheri	deciduous	tree	unlobed	dentate	pinnate	non-looped	F	F	F	no	no	no	no	no	no	no
SNSD, MMG_PB	Sf._4748	1			Seifhennersdorf	Lower Oligocene	Betulaceae	Carpinus	Carpinus_roscheri	deciduous	tree	unlobed	dentate	pinnate	non-looped	F	F	F	no	no	no	no	no	no	no
SNSD, MMG_PB	Sf._4756	1	1		Seifhennersdorf	Lower Oligocene	Betulaceae	Carpinus	Carpinus_roscheri	deciduous	tree	unlobed	dentate	pinnate	non-looped	F	F	F	no	no	no	no	no	no	no
SNSD, MMG_PB	Sf._4761a	1	1	1	Seifhennersdorf	Lower Oligocene	Betulaceae	Carpinus	Carpinus_roscheri	deciduous	tree	unlobed	dentate	pinnate	non-looped	F	F	F	no	no	no	no	no	no	no
SNSD, MMG_PB	Sf._4761b	1			Seifhennersdorf	Lower Oligocene	Betulaceae	Carpinus	Carpinus_roscheri	deciduous	tree	unlobed	dentate	pinnate	non-looped	F	F	F	no	no	no	no	no	no	no
SNSD, MMG_PB	Sf._4767	1			Seifhennersdorf	Lower Oligocene	Betulaceae	Carpinus	Carpinus_roscheri	deciduous	tree	unlobed	dentate	pinnate	non-looped	F	F	F	no	no	no	no	no	no	no
SNSD, MMG_PB	Sf._4779/4801	1			Seifhennersdorf	Lower Oligocene	Betulaceae	Carpinus	Carpinus_roscheri	deciduous	tree	unlobed	dentate	pinnate	non-looped	F	F	F	no	no	no	no	no	no	no
SNSD, MMG_PB	Sf._4782	1			Seifhennersdorf	Lower Oligocene	Betulaceae	Carpinus	Carpinus_roscheri	deciduous	tree	unlobed	dentate	pinnate	non-looped	F	F	F	no	no	no	no	no	no	no
SNSD, MMG_PB	Sf._4788	1			Seifhennersdorf	Lower Oligocene	Betulaceae	Carpinus	Carpinus_roscheri	deciduous	tree	unlobed	dentate	pinnate	non-looped	F	F	F	yes	yes	no	no	no	no	no	2	78
SNSD, MMG_PB	Sf._4796	1			Seifhennersdorf	Lower Oligocene	Betulaceae	Carpinus	Carpinus_roscheri	deciduous	tree	unlobed	dentate	pinnate	non-looped	F	F	F	no	no	no	no	no	no	no
SNSD, MMG_PB	Sf._4797	1			Seifhennersdorf	Lower Oligocene	Betulaceae	Carpinus	Carpinus_roscheri	deciduous	tree	unlobed	dentate	pinnate	non-looped	F	F	F	no	no	no	no	no	no	no
SNSD, MMG_PB	Sf._4803	1			Seifhennersdorf	Lower Oligocene	Betulaceae	Carpinus	Carpinus_roscheri	deciduous	tree	unlobed	dentate	pinnate	non-looped	F	F	F	no	no	no	no	no	no	no
SNSD, MMG_PB	Sf._4804	1			Seifhennersdorf	Lower Oligocene	Betulaceae	Carpinus	Carpinus_roscheri	deciduous	tree	unlobed	dentate	pinnate	non-looped	F	F	F	no	no	no	no	no	no	no
SNSD, MMG_PB	Sf._4806	1	1		Seifhennersdorf	Lower Oligocene	Betulaceae	Carpinus	Carpinus_roscheri	deciduous	tree	unlobed	dentate	pinnate	non-looped	F	F	F	yes	yes	no	no	no	no	no	78
SNSD, MMG_PB	Sf._4807	1	1	1	Seifhennersdorf	Lower Oligocene	Betulaceae	Carpinus	Carpinus_roscheri	deciduous	tree	unlobed	dentate	pinnate	non-looped	F	F	F	no	no	no	no	no	no	no
SNSD, MMG_PB	Sf._4808	1	1		Seifhennersdorf	Lower Oligocene	Betulaceae	Carpinus	Carpinus_roscheri	deciduous	tree	unlobed	dentate	pinnate	non-looped	F	F	F	no	no	no	no	no	no	no
SNSD, MMG_PB	Sf._4826	1			Seifhennersdorf	Lower Oligocene	Betulaceae	Carpinus	Carpinus_roscheri	deciduous	tree	unlobed	dentate	pinnate	non-looped	F	F	F	no	no	no	no	no	no	no
SNSD, MMG_PB	Sf._4827	1	1		Seifhennersdorf	Lower Oligocene	Betulaceae	Carpinus	Carpinus_roscheri	deciduous	tree	unlobed	dentate	pinnate	non-looped	F	F	F	no	no	no	no	no	no	no
SNSD, MMG_PB	Sf._4829	1			Seifhennersdorf	Lower Oligocene	Betulaceae	Carpinus	Carpinus_roscheri	deciduous	tree	unlobed	dentate	pinnate	non-looped	F	F	F	no	no	no	no	no	no	no
SNSD, MMG_PB	Sf._4832	1			Seifhennersdorf	Lower Oligocene	Betulaceae	Carpinus	Carpinus_roscheri	deciduous	tree	unlobed	dentate	pinnate	non-looped	F	F	F	no	no	no	no	no	no	no
SNSD, MMG_PB	Sf._4836:1,2	1	1		Seifhennersdorf	Lower Oligocene	Betulaceae	Carpinus	Carpinus_roscheri	deciduous	tree	unlobed	dentate	pinnate	non-looped	F	F	F	no	no	no	no	no	no	no
SNSD, MMG_PB	Sf._4839	1	1	1	Seifhennersdorf	Lower Oligocene	Betulaceae	Carpinus	Carpinus_roscheri	deciduous	tree	unlobed	dentate	pinnate	non-looped	F	F	F	no	no	no	no	no	no	no
SNSD, MMG_PB	Sf._4840:1,2	1	1		Seifhennersdorf	Lower Oligocene	Betulaceae	Carpinus	Carpinus_roscheri	deciduous	tree	unlobed	dentate	pinnate	non-looped	F	F	F	no	no	no	no	no	no	no
SNSD, MMG_PB	Sf._4841	1	1		Seifhennersdorf	Lower Oligocene	Betulaceae	Carpinus	Carpinus_roscheri	deciduous	tree	unlobed	dentate	pinnate	non-looped	F	F	F	no	no	no	no	no	no	no
SNSD, MMG_PB	Sf._4845	1	1		Seifhennersdorf	Lower Oligocene	Betulaceae	Carpinus	Carpinus_roscheri	deciduous	tree	unlobed	dentate	pinnate	non-looped	F	F	F	no	no	no	no	no	no	no
SNSD, MMG_PB	Sf._4846	1	1		Seifhennersdorf	Lower Oligocene	Betulaceae	Carpinus	Carpinus_roscheri	deciduous	tree	unlobed	dentate	pinnate	non-looped	F	F	F	no	no	no	no	no	no	no
SNSD, MMG_PB	Sf._4848	1			Seifhennersdorf	Lower Oligocene	Betulaceae	Carpinus	Carpinus_roscheri	deciduous	tree	unlobed	dentate	pinnate	non-looped	F	F	F	no	no	no	no	no	no	no
SNSD, MMG_PB	Sf._4854	1			Seifhennersdorf	Lower Oligocene	Betulaceae	Carpinus	Carpinus_roscheri	deciduous	tree	unlobed	dentate	pinnate	non-looped	F	F	F	no	no	no	no	no	no	no
SNSD, MMG_PB	Sf._4855	1	1		Seifhennersdorf	Lower Oligocene	Betulaceae	Carpinus	Carpinus_roscheri	deciduous	tree	unlobed	dentate	pinnate	non-looped	F	F	F	no	no	no	no	no	no	no
SNSD, MMG_PB	Sf._4856	1			Seifhennersdorf	Lower Oligocene	Betulaceae	Carpinus	Carpinus_roscheri	deciduous	tree	unlobed	dentate	pinnate	non-looped	F	F	F	no	no	no	no	no	no	no
SNSD, MMG_PB	Sf._4857	1			Seifhennersdorf	Lower Oligocene	Betulaceae	Carpinus	Carpinus_roscheri	deciduous	tree	unlobed	dentate	pinnate	non-looped	F	F	F	no	no	no	no	no	no	no
SNSD, MMG_PB	Sf._4859	1	1		Seifhennersdorf	Lower Oligocene	Betulaceae	Carpinus	Carpinus_roscheri	deciduous	tree	unlobed	dentate	pinnate	non-looped	F	F	F	no	no	no	no	no	no	no
SNSD, MMG_PB	Sf._4863	1	1		Seifhennersdorf	Lower Oligocene	Betulaceae	Carpinus	Carpinus_roscheri	deciduous	tree	unlobed	dentate	pinnate	non-looped	F	F	F	no	no	no	no	no	no	no
SNSD, MMG_PB	Sf._4867:1,2	1			Seifhennersdorf	Lower Oligocene	Betulaceae	Carpinus	Carpinus_roscheri	deciduous	tree	unlobed	dentate	pinnate	non-looped	F	F	F	no	no	no	no	no	no	no
SNSD, MMG_PB	Sf._4869	1	1		Seifhennersdorf	Lower Oligocene	Betulaceae	Carpinus	Carpinus_roscheri	deciduous	tree	unlobed	dentate	pinnate	non-looped	F	F	F	no	no	no	no	no	no	no
SNSD, MMG_PB	Sf._4871	1			Seifhennersdorf	Lower Oligocene	Betulaceae	Carpinus	Carpinus_roscheri	deciduous	tree	unlobed	dentate	pinnate	non-looped	F	F	F	no	no	no	no	no	no	no
SNSD, MMG_PB	Sf._4872	1			Seifhennersdorf	Lower Oligocene	Betulaceae	Carpinus	Carpinus_roscheri	deciduous	tree	unlobed	dentate	pinnate	non-looped	F	F	F	no	no	no	no	no	no	no
SNSD, MMG_PB	Sf._4873	1	1		Seifhennersdorf	Lower Oligocene	Betulaceae	Carpinus	Carpinus_roscheri	deciduous	tree	unlobed	dentate	pinnate	non-looped	F	F	F	yes	yes	no	no	no	no	no	2	78
SNSD, MMG_PB	Sf._4875	1	1		Seifhennersdorf	Lower Oligocene	Betulaceae	Carpinus	Carpinus_roscheri	deciduous	tree	unlobed	dentate	pinnate	non-looped	F	F	F	yes	yes	no	no	no	no	no	3
SNSD, MMG_PB	Sf._4876	1			Seifhennersdorf	Lower Oligocene	Betulaceae	Carpinus	Carpinus_roscheri	deciduous	tree	unlobed	dentate	pinnate	non-looped	F	F	F	no	no	no	no	no	no	no
SNSD, MMG_PB	Sf._4886:1,2a	1	1		Seifhennersdorf	Lower Oligocene	Betulaceae	Carpinus	Carpinus_roscheri	deciduous	tree	unlobed	dentate	pinnate	non-looped	F	F	F	no	no	no	no	no	no	no
SNSD, MMG_PB	Sf._4886:2b	1	1		Seifhennersdorf	Lower Oligocene	Betulaceae	Carpinus	Carpinus_roscheri	deciduous	tree	unlobed	dentate	pinnate	non-looped	F	F	F	no	no	no	no	no	no	no
SNSD, MMG_PB	Sf._4887:1,2a	1	1		Seifhennersdorf	Lower Oligocene	Betulaceae	Carpinus	Carpinus_roscheri	deciduous	tree	unlobed	dentate	pinnate	non-looped	F	F	F	no	no	no	no	no	no	no
SNSD, MMG_PB	Sf._4888	1	1		Seifhennersdorf	Lower Oligocene	Betulaceae	Carpinus	Carpinus_roscheri	deciduous	tree	unlobed	dentate	pinnate	non-looped	F	F	F	yes	no	yes	no	no	no	no	12
SNSD, MMG_PB	Sf._4889	1	1	1	Seifhennersdorf	Lower Oligocene	Betulaceae	Carpinus	Carpinus_roscheri	deciduous	tree	unlobed	dentate	pinnate	non-looped	F	F	F	no	no	no	no	no	no	no
SNSD, MMG_PB	Sf._4892	1			Seifhennersdorf	Lower Oligocene	Betulaceae	Carpinus	Carpinus_roscheri	deciduous	tree	unlobed	dentate	pinnate	non-looped	F	F	F	no	no	no	no	no	no	no
SNSD, MMG_PB	Sf._4894	1	1		Seifhennersdorf	Lower Oligocene	Betulaceae	Carpinus	Carpinus_roscheri	deciduous	tree	unlobed	dentate	pinnate	non-looped	F	F	F	no	no	no	no	no	no	no
SNSD, MMG_PB	Sf._4895	1	1		Seifhennersdorf	Lower Oligocene	Betulaceae	Carpinus	Carpinus_roscheri	deciduous	tree	unlobed	dentate	pinnate	non-looped	F	F	F	no	no	no	no	no	no	no
SNSD, MMG_PB	Sf._4901	1			Seifhennersdorf	Lower Oligocene	Betulaceae	Carpinus	Carpinus_roscheri	deciduous	tree	unlobed	dentate	pinnate	non-looped	F	F	F	no	no	no	no	no	no	no
SNSD, MMG_PB	Sf._4906	1	1		Seifhennersdorf	Lower Oligocene	Betulaceae	Carpinus	Carpinus_roscheri	deciduous	tree	unlobed	dentate	pinnate	non-looped	F	F	F	no	no	no	no	no	no	no
SNSD, MMG_PB	Sf._4908a	1	1		Seifhennersdorf	Lower Oligocene	Betulaceae	Carpinus	Carpinus_roscheri	deciduous	tree	unlobed	dentate	pinnate	non-looped	F	F	F	no	no	no	no	no	no	no
SNSD, MMG_PB	Sf._4910b	1	1		Seifhennersdorf	Lower Oligocene	Betulaceae	Carpinus	Carpinus_roscheri	deciduous	tree	unlobed	dentate	pinnate	non-looped	F	F	F	no	no	no	no	no	no	no
SNSD, MMG_PB	Sf._4918	1	1		Seifhennersdorf	Lower Oligocene	Betulaceae	Carpinus	Carpinus_roscheri	deciduous	tree	unlobed	dentate	pinnate	non-looped	F	F	F	no	no	no	no	no	no	no
SNSD, MMG_PB	Sf._4919	1			Seifhennersdorf	Lower Oligocene	Betulaceae	Carpinus	Carpinus_roscheri	deciduous	tree	unlobed	dentate	pinnate	non-looped	F	F	F	no	no	no	no	no	no	no
SNSD, MMG_PB	Sf._4922	1			Seifhennersdorf	Lower Oligocene	Betulaceae	Carpinus	Carpinus_roscheri	deciduous	tree	unlobed	dentate	pinnate	non-looped	F	F	F	no	no	no	no	no	no	no
SNSD, MMG_PB	Sf._4929	1	1		Seifhennersdorf	Lower Oligocene	Betulaceae	Carpinus	Carpinus_roscheri	deciduous	tree	unlobed	dentate	pinnate	non-looped	F	F	F	no	no	no	no	no	no	no
SNSD, MMG_PB	Sf._4933	1			Seifhennersdorf	Lower Oligocene	Betulaceae	Carpinus	Carpinus_roscheri	deciduous	tree	unlobed	dentate	pinnate	non-looped	F	F	F	no	no	no	no	no	no	no
SNSD, MMG_PB	Sf._4934	1			Seifhennersdorf	Lower Oligocene	Betulaceae	Carpinus	Carpinus_roscheri	deciduous	tree	unlobed	dentate	pinnate	non-looped	F	F	F	no	no	no	no	no	no	no
SNSD, MMG_PB	Sf._4935a	1			Seifhennersdorf	Lower Oligocene	Betulaceae	Carpinus	Carpinus_roscheri	deciduous	tree	unlobed	dentate	pinnate	non-looped	F	F	F	no	no	no	no	no	no	no
SNSD, MMG_PB	Sf._4948	1			Seifhennersdorf	Lower Oligocene	Betulaceae	Carpinus	Carpinus_roscheri	deciduous	tree	unlobed	dentate	pinnate	non-looped	F	F	F	no	no	no	no	no	no	no
SNSD, MMG_PB	Sf._4960	1	1		Seifhennersdorf	Lower Oligocene	Betulaceae	Carpinus	Carpinus_roscheri	deciduous	tree	unlobed	dentate	pinnate	non-looped	F	F	F	no	no	no	no	no	no	no
SNSD, MMG_PB	Sf._4961:1,2	1	1		Seifhennersdorf	Lower Oligocene	Betulaceae	Carpinus	Carpinus_roscheri	deciduous	tree	unlobed	dentate	pinnate	non-looped	F	F	F	no	no	no	no	no	no	no
SNSD, MMG_PB	Sf._4962	1			Seifhennersdorf	Lower Oligocene	Betulaceae	Carpinus	Carpinus_roscheri	deciduous	tree	unlobed	dentate	pinnate	non-looped	F	F	F	no	no	no	no	no	no	no
SNSD, MMG_PB	Sf._4963	1			Seifhennersdorf	Lower Oligocene	Betulaceae	Carpinus	Carpinus_roscheri	deciduous	tree	unlobed	dentate	pinnate	non-looped	F	F	F	no	no	no	no	no	no	no
SNSD, MMG_PB	Sf._4967a	1	1		Seifhennersdorf	Lower Oligocene	Betulaceae	Carpinus	Carpinus_roscheri	deciduous	tree	unlobed	dentate	pinnate	non-looped	F	F	F	no	no	no	no	no	no	no
SNSD, MMG_PB	Sf._4974a	1			Seifhennersdorf	Lower Oligocene	Betulaceae	Carpinus	Carpinus_roscheri	deciduous	tree	unlobed	dentate	pinnate	non-looped	F	F	F	no	no	no	no	no	no	no
SNSD, MMG_PB	Sf._4974b	1			Seifhennersdorf	Lower Oligocene	Betulaceae	Carpinus	Carpinus_roscheri	deciduous	tree	unlobed	dentate	pinnate	non-looped	F	F	F	no	no	no	no	no	no	no
SNSD, MMG_PB	Sf._4982	1	1		Seifhennersdorf	Lower Oligocene	Betulaceae	Carpinus	Carpinus_roscheri	deciduous	tree	unlobed	dentate	pinnate	non-looped	F	F	F	yes	yes	no	no	no	no	no	78
SNSD, MMG_PB	Sf._4990	1			Seifhennersdorf	Lower Oligocene	Betulaceae	Carpinus	Carpinus_roscheri	deciduous	tree	unlobed	dentate	pinnate	non-looped	F	F	F	no	no	no	no	no	no	no
SNSD, MMG_PB	Sf._4993	1			Seifhennersdorf	Lower Oligocene	Betulaceae	Carpinus	Carpinus_roscheri	deciduous	tree	unlobed	dentate	pinnate	non-looped	F	F	F	no	no	no	no	no	no	no
SNSD, MMG_PB	Sf._5010	1	1		Seifhennersdorf	Lower Oligocene	Betulaceae	Carpinus	Carpinus_roscheri	deciduous	tree	unlobed	dentate	pinnate	non-looped	F	F	F	no	no	no	no	no	no	no
SNSD, MMG_PB	Sf._5018	1	1		Seifhennersdorf	Lower Oligocene	Betulaceae	Carpinus	Carpinus_roscheri	deciduous	tree	unlobed	dentate	pinnate	non-looped	F	F	F	no	no	no	no	no	no	no
SNSD, MMG_PB	Sf._5020	1	1		Seifhennersdorf	Lower Oligocene	Betulaceae	Carpinus	Carpinus_roscheri	deciduous	tree	unlobed	dentate	pinnate	non-looped	F	F	F	no	no	no	no	no	no	no
SNSD, MMG_PB	Sf._5028	1			Seifhennersdorf	Lower Oligocene	Betulaceae	Carpinus	Carpinus_roscheri	deciduous	tree	unlobed	dentate	pinnate	non-looped	F	F	F	no	no	no	no	no	no	no
SNSD, MMG_PB	Sf._5035	1			Seifhennersdorf	Lower Oligocene	Betulaceae	Carpinus	Carpinus_roscheri	deciduous	tree	unlobed	dentate	pinnate	non-looped	F	F	F	no	no	no	no	no	no	no
SNSD, MMG_PB	Sf._5037	1			Seifhennersdorf	Lower Oligocene	Betulaceae	Carpinus	Carpinus_roscheri	deciduous	tree	unlobed	dentate	pinnate	non-looped	F	F	F	no	no	no	no	no	no	no
SNSD, MMG_PB	Sf._5041	1	1		Seifhennersdorf	Lower Oligocene	Betulaceae	Carpinus	Carpinus_roscheri	deciduous	tree	unlobed	dentate	pinnate	non-looped	F	F	F	no	no	no	no	no	no	no
SNSD, MMG_PB	Sf._5042:1,2	1	1		Seifhennersdorf	Lower Oligocene	Betulaceae	Carpinus	Carpinus_roscheri	deciduous	tree	unlobed	dentate	pinnate	non-looped	F	F	F	yes	yes	no	no	no	no	no	78
SNSD, MMG_PB	Sf._5053	1			Seifhennersdorf	Lower Oligocene	Betulaceae	Carpinus	Carpinus_roscheri	deciduous	tree	unlobed	dentate	pinnate	non-looped	F	F	F	no	no	no	no	no	no	no
SNSD, MMG_PB	Sf._5059	1	1		Seifhennersdorf	Lower Oligocene	Betulaceae	Carpinus	Carpinus_roscheri	deciduous	tree	unlobed	dentate	pinnate	non-looped	F	F	F	no	no	no	no	no	no	no
SNSD, MMG_PB	Sf._5060b	1			Seifhennersdorf	Lower Oligocene	Betulaceae	Carpinus	Carpinus_roscheri	deciduous	tree	unlobed	dentate	pinnate	non-looped	F	F	F	no	no	no	no	no	no	no
SNSD, MMG_PB	Sf._5062	1			Seifhennersdorf	Lower Oligocene	Betulaceae	Carpinus	Carpinus_roscheri	deciduous	tree	unlobed	dentate	pinnate	non-looped	F	F	F	no	no	no	no	no	no	no
SNSD, MMG_PB	Sf._5065	1	1		Seifhennersdorf	Lower Oligocene	Betulaceae	Carpinus	Carpinus_roscheri	deciduous	tree	unlobed	dentate	pinnate	non-looped	F	F	F	no	no	no	no	no	no	no
SNSD, MMG_PB	Sf._5067	1			Seifhennersdorf	Lower Oligocene	Betulaceae	Carpinus	Carpinus_roscheri	deciduous	tree	unlobed	dentate	pinnate	non-looped	F	F	F	no	no	no	no	no	no	no
SNSD, MMG_PB	Sf._5068	1			Seifhennersdorf	Lower Oligocene	Betulaceae	Carpinus	Carpinus_roscheri	deciduous	tree	unlobed	dentate	pinnate	non-looped	F	F	F	no	no	no	no	no	no	no
SNSD, MMG_PB	Sf._5071/5070	1			Seifhennersdorf	Lower Oligocene	Betulaceae	Carpinus	Carpinus_roscheri	deciduous	tree	unlobed	dentate	pinnate	non-looped	F	F	F	no	no	no	no	no	no	no
SNSD, MMG_PB	Sf._5072:1,2	1	1		Seifhennersdorf	Lower Oligocene	Betulaceae	Carpinus	Carpinus_roscheri	deciduous	tree	unlobed	dentate	pinnate	non-looped	F	F	F	yes	yes	no	no	no	no	no	78
SNSD, MMG_PB	Sf._5075	1			Seifhennersdorf	Lower Oligocene	Betulaceae	Carpinus	Carpinus_roscheri	deciduous	tree	unlobed	dentate	pinnate	non-looped	F	F	F	no	no	no	no	no	no	no
SNSD, MMG_PB	Sf._5076	1	1	1	Seifhennersdorf	Lower Oligocene	Betulaceae	Carpinus	Carpinus_roscheri	deciduous	tree	unlobed	dentate	pinnate	non-looped	F	F	F	no	no	no	no	no	no	no
SNSD, MMG_PB	Sf._5079	1	1	1	Seifhennersdorf	Lower Oligocene	Betulaceae	Carpinus	Carpinus_roscheri	deciduous	tree	unlobed	dentate	pinnate	non-looped	F	F	F	no	no	no	no	no	no	no
SNSD, MMG_PB	Sf._5085:1,2	1	1		Seifhennersdorf	Lower Oligocene	Betulaceae	Carpinus	Carpinus_roscheri	deciduous	tree	unlobed	dentate	pinnate	non-looped	F	F	F	no	no	no	no	no	no	no
SNSD, MMG_PB	Sf._5086:1,2	1			Seifhennersdorf	Lower Oligocene	Betulaceae	Carpinus	Carpinus_roscheri	deciduous	tree	unlobed	dentate	pinnate	non-looped	F	F	F	yes	no	yes	no	no	no	no	12
SNSD, MMG_PB	Sf._5097	1	1		Seifhennersdorf	Lower Oligocene	Betulaceae	Carpinus	Carpinus_roscheri	deciduous	tree	unlobed	dentate	pinnate	non-looped	F	F	F	no	no	no	no	no	no	no
SNSD, MMG_PB	Sf._5098	1	1		Seifhennersdorf	Lower Oligocene	Betulaceae	Carpinus	Carpinus_roscheri	deciduous	tree	unlobed	dentate	pinnate	non-looped	F	F	F	no	no	no	no	no	no	no
SNSD, MMG_PB	Sf._5107	1			Seifhennersdorf	Lower Oligocene	Betulaceae	Carpinus	Carpinus_roscheri	deciduous	tree	unlobed	dentate	pinnate	non-looped	F	F	F	no	no	no	no	no	no	no
SNSD, MMG_PB	Sf._5108	1			Seifhennersdorf	Lower Oligocene	Betulaceae	Carpinus	Carpinus_roscheri	deciduous	tree	unlobed	dentate	pinnate	non-looped	F	F	F	no	no	no	no	no	no	no
SNSD, MMG_PB	Sf._5113	1	1		Seifhennersdorf	Lower Oligocene	Betulaceae	Carpinus	Carpinus_roscheri	deciduous	tree	unlobed	dentate	pinnate	non-looped	F	F	F	no	no	no	no	no	no	no
SNSD, MMG_PB	Sf._5118	1			Seifhennersdorf	Lower Oligocene	Betulaceae	Carpinus	Carpinus_roscheri	deciduous	tree	unlobed	dentate	pinnate	non-looped	F	F	F	no	no	no	no	no	no	no
SNSD, MMG_PB	Sf._5119	1			Seifhennersdorf	Lower Oligocene	Betulaceae	Carpinus	Carpinus_roscheri	deciduous	tree	unlobed	dentate	pinnate	non-looped	F	F	F	no	no	no	no	no	no	no
SNSD, MMG_PB	Sf._5124	1	1		Seifhennersdorf	Lower Oligocene	Betulaceae	Carpinus	Carpinus_roscheri	deciduous	tree	unlobed	dentate	pinnate	non-looped	F	F	F	yes	yes	no	no	no	no	no	2
SNSD, MMG_PB	Sf._5133	1			Seifhennersdorf	Lower Oligocene	Betulaceae	Carpinus	Carpinus_roscheri	deciduous	tree	unlobed	dentate	pinnate	non-looped	F	F	F	no	no	no	no	no	no	no
SNSD, MMG_PB	Sf._5135	1			Seifhennersdorf	Lower Oligocene	Betulaceae	Carpinus	Carpinus_roscheri	deciduous	tree	unlobed	dentate	pinnate	non-looped	F	F	F	no	no	no	no	no	no	no
SNSD, MMG_PB	Sf._5147	1	1		Seifhennersdorf	Lower Oligocene	Betulaceae	Carpinus	Carpinus_roscheri	deciduous	tree	unlobed	dentate	pinnate	non-looped	F	F	F	no	no	no	no	no	no	no
SNSD, MMG_PB	Sf._5154	1	1		Seifhennersdorf	Lower Oligocene	Betulaceae	Carpinus	Carpinus_roscheri	deciduous	tree	unlobed	dentate	pinnate	non-looped	F	F	F	no	no	no	no	no	no	no
SNSD, MMG_PB	Sf._5156	1			Seifhennersdorf	Lower Oligocene	Betulaceae	Carpinus	Carpinus_roscheri	deciduous	tree	unlobed	dentate	pinnate	non-looped	F	F	F	no	no	no	no	no	no	no
SNSD, MMG_PB	Sf._5157	1	1		Seifhennersdorf	Lower Oligocene	Betulaceae	Carpinus	Carpinus_roscheri	deciduous	tree	unlobed	dentate	pinnate	non-looped	F	F	F	no	no	no	no	no	no	no
SNSD, MMG_PB	Sf._5158	1	1		Seifhennersdorf	Lower Oligocene	Betulaceae	Carpinus	Carpinus_roscheri	deciduous	tree	unlobed	dentate	pinnate	non-looped	F	F	F	no	no	no	no	no	no	no
SNSD, MMG_PB	Sf._5160:1,2	1	1		Seifhennersdorf	Lower Oligocene	Betulaceae	Carpinus	Carpinus_roscheri	deciduous	tree	unlobed	dentate	pinnate	non-looped	F	F	F	no	no	no	no	no	no	no
SNSD, MMG_PB	Sf._5169	1	1		Seifhennersdorf	Lower Oligocene	Betulaceae	Carpinus	Carpinus_roscheri	deciduous	tree	unlobed	dentate	pinnate	non-looped	F	F	F	no	no	no	no	no	no	no
SNSD, MMG_PB	Sf._5170	1			Seifhennersdorf	Lower Oligocene	Betulaceae	Carpinus	Carpinus_roscheri	deciduous	tree	unlobed	dentate	pinnate	non-looped	F	F	F	no	no	no	no	no	no	no
SNSD, MMG_PB	Sf._5178	1			Seifhennersdorf	Lower Oligocene	Betulaceae	Carpinus	Carpinus_roscheri	deciduous	tree	unlobed	dentate	pinnate	non-looped	F	F	F	no	no	no	no	no	no	no
SNSD, MMG_PB	Sf._5192	1	1		Seifhennersdorf	Lower Oligocene	Betulaceae	Carpinus	Carpinus_roscheri	deciduous	tree	unlobed	dentate	pinnate	non-looped	F	F	F	no	no	no	no	no	no	no
SNSD, MMG_PB	Sf._5197c	1			Seifhennersdorf	Lower Oligocene	Betulaceae	Carpinus	Carpinus_roscheri	deciduous	tree	unlobed	dentate	pinnate	non-looped	F	F	F	no	no	no	no	no	no	no
SNSD, MMG_PB	Sf._5198	1	1		Seifhennersdorf	Lower Oligocene	Betulaceae	Carpinus	Carpinus_roscheri	deciduous	tree	unlobed	dentate	pinnate	non-looped	F	F	F	no	no	no	no	no	no	no
SNSD, MMG_PB	Sf._5201	1	1		Seifhennersdorf	Lower Oligocene	Betulaceae	Carpinus	Carpinus_roscheri	deciduous	tree	unlobed	dentate	pinnate	non-looped	F	F	F	no	no	no	no	no	no	no
SNSD, MMG_PB	Sf._5211:1,2	1	1		Seifhennersdorf	Lower Oligocene	Betulaceae	Carpinus	Carpinus_roscheri	deciduous	tree	unlobed	dentate	pinnate	non-looped	F	F	F	no	no	no	no	no	no	no
SNSD, MMG_PB	Sf._5216	1			Seifhennersdorf	Lower Oligocene	Betulaceae	Carpinus	Carpinus_roscheri	deciduous	tree	unlobed	dentate	pinnate	non-looped	F	F	F	no	no	no	no	no	no	no
SNSD, MMG_PB	Sf._5220	1			Seifhennersdorf	Lower Oligocene	Betulaceae	Carpinus	Carpinus_roscheri	deciduous	tree	unlobed	dentate	pinnate	non-looped	F	F	F	no	no	no	no	no	no	no
SNSD, MMG_PB	Sf._5225	1			Seifhennersdorf	Lower Oligocene	Betulaceae	Carpinus	Carpinus_roscheri	deciduous	tree	unlobed	dentate	pinnate	non-looped	F	F	F	no	no	no	no	no	no	no
SNSD, MMG_PB	Sf._5227:1,2	1			Seifhennersdorf	Lower Oligocene	Betulaceae	Carpinus	Carpinus_roscheri	deciduous	tree	unlobed	dentate	pinnate	non-looped	F	F	F	no	no	no	no	no	no	no
SNSD, MMG_PB	Sf._5228:1,2	1			Seifhennersdorf	Lower Oligocene	Betulaceae	Carpinus	Carpinus_roscheri	deciduous	tree	unlobed	dentate	pinnate	non-looped	F	F	F	no	no	no	no	no	no	no
SNSD, MMG_PB	Sf._5230a	1			Seifhennersdorf	Lower Oligocene	Betulaceae	Carpinus	Carpinus_roscheri	deciduous	tree	unlobed	dentate	pinnate	non-looped	F	F	F	no	no	no	no	no	no	no
SNSD, MMG_PB	Sf._5256/5231	1			Seifhennersdorf	Lower Oligocene	Betulaceae	Carpinus	Carpinus_roscheri	deciduous	tree	unlobed	dentate	pinnate	non-looped	F	F	F	no	no	no	no	no	no	no
SNSD, MMG_PB	Sf._5257	1	1		Seifhennersdorf	Lower Oligocene	Betulaceae	Carpinus	Carpinus_roscheri	deciduous	tree	unlobed	dentate	pinnate	non-looped	F	F	F	no	no	no	no	no	no	no
SNSD, MMG_PB	Sf._5263:1,2a	1	1		Seifhennersdorf	Lower Oligocene	Betulaceae	Carpinus	Carpinus_roscheri	deciduous	tree	unlobed	dentate	pinnate	non-looped	F	F	F	no	no	no	no	no	no	no
SNSD, MMG_PB	Sf._5461b	1			Seifhennersdorf	Lower Oligocene	Betulaceae	Carpinus	Carpinus_roscheri	deciduous	tree	unlobed	dentate	pinnate	non-looped	F	F	F	no	no	no	no	no	no	no
SNSD, MMG_PB	Sf._6621	1			Seifhennersdorf	Lower Oligocene	Betulaceae	Carpinus	Carpinus_roscheri	deciduous	tree	unlobed	dentate	pinnate	non-looped	F	F	F	yes	no	yes	no	no	no	no	12
SNSD, MMG_PB	Sf._6626	1	1		Seifhennersdorf	Lower Oligocene	Betulaceae	Carpinus	Carpinus_roscheri	deciduous	tree	unlobed	dentate	pinnate	non-looped	F	F	F	no	no	no	no	no	no	no
SNSD, MMG_PB	Sf._7826:1,2a	1			Seifhennersdorf	Lower Oligocene	Betulaceae	Carpinus	Carpinus_roscheri	deciduous	tree	unlobed	dentate	pinnate	non-looped	F	F	F	no	no	no	no	no	no	no
SNSD, MMG_PB	Sf._7826:2,3a	1			Seifhennersdorf	Lower Oligocene	Betulaceae	Carpinus	Carpinus_roscheri	deciduous	tree	unlobed	dentate	pinnate	non-looped	F	F	F	no	no	no	no	no	no	no
SNSD, MMG_PB	Sf._8097	1	1		Seifhennersdorf	Lower Oligocene	Betulaceae	Carpinus	Carpinus_roscheri	deciduous	tree	unlobed	dentate	pinnate	non-looped	F	F	F	no	no	no	no	no	no	no
SNSD, MMG_PB	Sf._8115	1			Seifhennersdorf	Lower Oligocene	Betulaceae	Carpinus	Carpinus_roscheri	deciduous	tree	unlobed	dentate	pinnate	non-looped	F	F	F	no	no	no	no	no	no	no
SNSD, MMG_PB	Sf._8120	1			Seifhennersdorf	Lower Oligocene	Betulaceae	Carpinus	Carpinus_roscheri	deciduous	tree	unlobed	dentate	pinnate	non-looped	F	F	F	no	no	no	no	no	no	no
SNSD, MMG_PB	Sf._8157	1			Seifhennersdorf	Lower Oligocene	Betulaceae	Carpinus	Carpinus_roscheri	deciduous	tree	unlobed	dentate	pinnate	non-looped	F	F	F	no	no	no	no	no	no	no
SNSD, MMG_PB	Sf._8158	1			Seifhennersdorf	Lower Oligocene	Betulaceae	Carpinus	Carpinus_roscheri	deciduous	tree	unlobed	dentate	pinnate	non-looped	F	F	F	yes	yes	no	no	no	no	no	2
SNSD, MMG_PB	Sf._8161	1			Seifhennersdorf	Lower Oligocene	Betulaceae	Carpinus	Carpinus_roscheri	deciduous	tree	unlobed	dentate	pinnate	non-looped	F	F	F	no	no	no	no	no	no	no
SNSD, MMG_PB	Sf._8191	1	1	1	Seifhennersdorf	Lower Oligocene	Betulaceae	Carpinus	Carpinus_roscheri	deciduous	tree	unlobed	dentate	pinnate	non-looped	F	F	F	no	no	no	no	no	no	no
SNSD, MMG_PB	Sf._8267a	1			Seifhennersdorf	Lower Oligocene	Betulaceae	Carpinus	Carpinus_roscheri	deciduous	tree	unlobed	dentate	pinnate	non-looped	F	F	F	no	no	no	no	no	no	no
SNSD, MMG_PB	Sf._8272	1	1	1	Seifhennersdorf	Lower Oligocene	Betulaceae	Carpinus	Carpinus_roscheri	deciduous	tree	unlobed	dentate	pinnate	non-looped	F	F	F	no	no	no	no	no	no	no
SNSD, MMG_PB	Sf._8408	1	1	1	Seifhennersdorf	Lower Oligocene	Betulaceae	Carpinus	Carpinus_roscheri	deciduous	tree	unlobed	dentate	pinnate	non-looped	F	F	F	no	no	no	no	no	no	no
SNSD, MMG_PB	Sf._8433	1			Seifhennersdorf	Lower Oligocene	Betulaceae	Carpinus	Carpinus_roscheri	deciduous	tree	unlobed	dentate	pinnate	non-looped	F	F	F	no	no	no	no	no	no	no
SNSD, MMG_PB	Sf._8435	1			Seifhennersdorf	Lower Oligocene	Betulaceae	Carpinus	Carpinus_roscheri	deciduous	tree	unlobed	dentate	pinnate	non-looped	F	F	F	no	no	no	no	no	no	no
SNSD, MMG_PB	Sf._8443:1,2	1	1		Seifhennersdorf	Lower Oligocene	Betulaceae	Carpinus	Carpinus_roscheri	deciduous	tree	unlobed	dentate	pinnate	non-looped	F	F	F	no	no	no	no	no	no	no
SNSD, MMG_PB	Sf._8444	1	1		Seifhennersdorf	Lower Oligocene	Betulaceae	Carpinus	Carpinus_roscheri	deciduous	tree	unlobed	dentate	pinnate	non-looped	F	F	F	no	no	no	no	no	no	no
SNSD, MMG_PB	Sf._8473:1,2,3	1	1		Seifhennersdorf	Lower Oligocene	Betulaceae	Carpinus	Carpinus_roscheri	deciduous	tree	unlobed	dentate	pinnate	non-looped	F	F	F	no	no	no	no	no	no	no
SNSD, MMG_PB	Sf._8474	1	1	1	Seifhennersdorf	Lower Oligocene	Betulaceae	Carpinus	Carpinus_roscheri	deciduous	tree	unlobed	dentate	pinnate	non-looped	F	F	F	no	no	no	no	no	no	no
SNSD, MMG_PB	Sf._8481	1			Seifhennersdorf	Lower Oligocene	Betulaceae	Carpinus	Carpinus_roscheri	deciduous	tree	unlobed	dentate	pinnate	non-looped	F	F	F	no	no	no	no	no	no	no
SNSD, MMG_PB	Sf._8486:1,2	1	1		Seifhennersdorf	Lower Oligocene	Betulaceae	Carpinus	Carpinus_roscheri	deciduous	tree	unlobed	dentate	pinnate	non-looped	F	F	F	yes	yes	no	no	no	no	no	2
SNSD, MMG_PB	Sf._8488	1	1	1	Seifhennersdorf	Lower Oligocene	Betulaceae	Carpinus	Carpinus_roscheri	deciduous	tree	unlobed	dentate	pinnate	non-looped	F	F	F	no	no	no	no	no	no	no
SNSD, MMG_PB	Sf._8490	1			Seifhennersdorf	Lower Oligocene	Betulaceae	Carpinus	Carpinus_roscheri	deciduous	tree	unlobed	dentate	pinnate	non-looped	F	F	F	no	no	no	no	no	no	no
SNSD, MMG_PB	Sf._8506	1	1		Seifhennersdorf	Lower Oligocene	Betulaceae	Carpinus	Carpinus_roscheri	deciduous	tree	unlobed	dentate	pinnate	non-looped	F	F	F	no	no	no	no	no	no	no
SNSD, MMG_PB	Sf._8519 (I)	1			Seifhennersdorf	Lower Oligocene	Betulaceae	Carpinus	Carpinus_roscheri	deciduous	tree	unlobed	dentate	pinnate	non-looped	F	F	F	no	no	no	no	no	no	no
SNSD, MMG_PB	Sf._8535:1,2	1	1		Seifhennersdorf	Lower Oligocene	Betulaceae	Carpinus	Carpinus_roscheri	deciduous	tree	unlobed	dentate	pinnate	non-looped	F	F	F	no	no	no	no	no	no	no
SNSD, MMG_PB	Sf._8549	1			Seifhennersdorf	Lower Oligocene	Betulaceae	Carpinus	Carpinus_roscheri	deciduous	tree	unlobed	dentate	pinnate	non-looped	F	F	F	no	no	no	no	no	no	no
SNSD, MMG_PB	Sf._8573	1	1		Seifhennersdorf	Lower Oligocene	Betulaceae	Carpinus	Carpinus_roscheri	deciduous	tree	unlobed	dentate	pinnate	non-looped	F	F	F	no	no	no	no	no	no	no
SNSD, MMG_PB	Sf._8593	1	1		Seifhennersdorf	Lower Oligocene	Betulaceae	Carpinus	Carpinus_roscheri	deciduous	tree	unlobed	dentate	pinnate	non-looped	F	F	F	no	no	no	no	no	no	no
SNSD, MMG_PB	Sf._8613	1			Seifhennersdorf	Lower Oligocene	Betulaceae	Carpinus	Carpinus_roscheri	deciduous	tree	unlobed	dentate	pinnate	non-looped	F	F	F	no	no	no	no	no	no	no
SNSD, MMG_PB	Sf._8650	1			Seifhennersdorf	Lower Oligocene	Betulaceae	Carpinus	Carpinus_roscheri	deciduous	tree	unlobed	dentate	pinnate	non-looped	F	F	F	no	no	no	no	no	no	no
SNSD, MMG_PB	Sf._924	1			Seifhennersdorf	Lower Oligocene	Betulaceae	Carpinus?	Betulaceae_indet	deciduous	tree	unlobed	dentate	pinnate	non-looped	F	F	F	no	no	no	no	no	no	no
SNSD, MMG_PB	Sf._1374	1			Seifhennersdorf	Lower Oligocene	Betulaceae	Carpinus?	Betulaceae_indet	deciduous	tree	unlobed	dentate	pinnate	non-looped	F	F	F	no	no	no	no	no	no	no
SNSD, MMG_PB	Sf._1375	1			Seifhennersdorf	Lower Oligocene	Betulaceae	Carpinus?	Betulaceae_indet	deciduous	tree	unlobed	dentate	pinnate	non-looped	F	F	F	yes	yes	no	no	no	no	no	3
SNSD, MMG_PB	Sf._1378/1	1			Seifhennersdorf	Lower Oligocene	Betulaceae	Carpinus?	Betulaceae_indet	deciduous	tree	unlobed	dentate	pinnate	non-looped	F	F	F	no	no	no	no	no	no	no
SNSD, MMG_PB	Sf._1378/2	1			Seifhennersdorf	Lower Oligocene	Betulaceae	Carpinus?	Betulaceae_indet	deciduous	tree	unlobed	dentate	pinnate	non-looped	F	F	F	no	no	no	no	no	no	no
SNSD, MMG_PB	Sf._1381:1,2	1	1		Seifhennersdorf	Lower Oligocene	Betulaceae	Carpinus?	Betulaceae_indet	deciduous	tree	unlobed	dentate	pinnate	non-looped	F	F	F	no	no	no	no	no	no	no
SNSD, MMG_PB	Sf._1516	1			Seifhennersdorf	Lower Oligocene	Betulaceae	Carpinus?	Betulaceae_indet	deciduous	tree	unlobed	dentate	pinnate	non-looped	F	F	F	no	no	no	no	no	no	no
SNSD, MMG_PB	Sf._1546	1			Seifhennersdorf	Lower Oligocene	Betulaceae	Carpinus?	Betulaceae_indet	deciduous	tree	NA	NA	NA	NA	NA	F	NA	no	no	no	no	no	no	no
SNSD, MMG_PB	Sf._1548	1			Seifhennersdorf	Lower Oligocene	Betulaceae	Carpinus?	Betulaceae_indet	deciduous	tree	NA	NA	NA	NA	NA	F	NA	no	no	no	no	no	no	no
SNSD, MMG_PB	Sf._1563	1	1		Seifhennersdorf	Lower Oligocene	Betulaceae	Carpinus?	Betulaceae_indet	deciduous	tree	unlobed	dentate	pinnate	non-looped	F	F	F	no	no	no	no	no	no	no
SNSD, MMG_PB	Sf._1615	1			Seifhennersdorf	Lower Oligocene	Betulaceae	Carpinus?	Betulaceae_indet	deciduous	tree	unlobed	dentate	pinnate	non-looped	F	F	F	no	no	no	no	no	no	no
SNSD, MMG_PB	Sf._1640 (II)	1			Seifhennersdorf	Lower Oligocene	Betulaceae	Carpinus?	Betulaceae_indet	deciduous	tree	NA	NA	NA	NA	NA	F	NA	no	no	no	no	no	no	no
SNSD, MMG_PB	Sf._1648 (I)	1			Seifhennersdorf	Lower Oligocene	Betulaceae	Carpinus?	Betulaceae_indet	deciduous	tree	NA	NA	NA	NA	NA	F	NA	no	no	no	no	no	no	no
SNSD, MMG_PB	Sf._1663	1			Seifhennersdorf	Lower Oligocene	Betulaceae	Carpinus?	Betulaceae_indet	deciduous	tree	unlobed	dentate	pinnate	non-looped	F	F	F	no	no	no	no	no	no	no
SNSD, MMG_PB	Sf._1763	1	1		Seifhennersdorf	Lower Oligocene	Betulaceae	Carpinus?	Betulaceae_indet	deciduous	tree	unlobed	dentate	pinnate	non-looped	F	F	F	no	no	no	no	no	no	no
SNSD, MMG_PB	Sf._1767	1			Seifhennersdorf	Lower Oligocene	Betulaceae	Carpinus?	Betulaceae_indet	deciduous	tree	NA	NA	NA	NA	NA	F	NA	no	no	no	no	no	no	no
SNSD, MMG_PB	Sf._1776	1	1		Seifhennersdorf	Lower Oligocene	Betulaceae	Carpinus?	Betulaceae_indet	deciduous	tree	unlobed	dentate	pinnate	non-looped	F	F	F	no	no	no	no	no	no	no
SNSD, MMG_PB	Sf._1815	1			Seifhennersdorf	Lower Oligocene	Betulaceae	Carpinus?	Betulaceae_indet	deciduous	tree	unlobed	dentate	pinnate	non-looped	F	F	F	no	no	no	no	no	no	no
SNSD, MMG_PB	Sf._1859	1			Seifhennersdorf	Lower Oligocene	Betulaceae	Carpinus?	Betulaceae_indet	deciduous	tree	NA	NA	NA	NA	NA	F	NA	no	no	no	no	no	no	no
SNSD, MMG_PB	Sf._1874	1			Seifhennersdorf	Lower Oligocene	Betulaceae	Carpinus?	Betulaceae_indet	deciduous	tree	NA	NA	NA	NA	NA	F	NA	no	no	no	no	no	no	no
SNSD, MMG_PB	Sf._1887	1	1		Seifhennersdorf	Lower Oligocene	Betulaceae	Carpinus?	Betulaceae_indet	deciduous	tree	unlobed	dentate	pinnate	non-looped	F	F	F	no	no	no	no	no	no	no
SNSD, MMG_PB	Sf._1889	1			Seifhennersdorf	Lower Oligocene	Betulaceae	Carpinus?	Betulaceae_indet	deciduous	tree	NA	NA	NA	NA	NA	F	NA	no	no	no	no	no	no	no
SNSD, MMG_PB	Sf._1909	1			Seifhennersdorf	Lower Oligocene	Betulaceae	Carpinus?	Betulaceae_indet	deciduous	tree	NA	NA	NA	NA	NA	F	NA	no	no	no	no	no	no	no
SNSD, MMG_PB	Sf._1927	1			Seifhennersdorf	Lower Oligocene	Betulaceae	Carpinus?	Betulaceae_indet	deciduous	tree	unlobed	dentate	pinnate	non-looped	F	F	F	no	no	no	no	no	no	no
SNSD, MMG_PB	Sf._1950	1	1		Seifhennersdorf	Lower Oligocene	Betulaceae	Carpinus?	Betulaceae_indet	deciduous	tree	unlobed	dentate	pinnate	non-looped	F	F	F	no	no	no	no	no	no	no
SNSD, MMG_PB	Sf._1951	1			Seifhennersdorf	Lower Oligocene	Betulaceae	Carpinus?	Betulaceae_indet	deciduous	tree	NA	NA	NA	NA	NA	F	NA	no	no	no	no	no	no	no
SNSD, MMG_PB	Sf._1954	1			Seifhennersdorf	Lower Oligocene	Betulaceae	Carpinus?	Betulaceae_indet	deciduous	tree	NA	NA	NA	NA	NA	F	NA	no	no	no	no	no	no	no
SNSD, MMG_PB	Sf._1972	1			Seifhennersdorf	Lower Oligocene	Betulaceae	Carpinus?	Betulaceae_indet	deciduous	tree	NA	NA	NA	NA	NA	F	NA	no	no	no	no	no	no	no
SNSD, MMG_PB	Sf._2000	1			Seifhennersdorf	Lower Oligocene	Betulaceae	Carpinus?	Betulaceae_indet	deciduous	tree	unlobed	dentate	pinnate	non-looped	F	F	F	yes	yes	no	no	no	no	no	2
SNSD, MMG_PB	Sf._2060	1			Seifhennersdorf	Lower Oligocene	Betulaceae	Carpinus?	Betulaceae_indet	deciduous	tree	unlobed	dentate	pinnate	non-looped	F	F	F	no	no	no	no	no	no	no
SNSD, MMG_PB	Sf._2106	1			Seifhennersdorf	Lower Oligocene	Betulaceae	Carpinus?	Betulaceae_indet	deciduous	tree	NA	NA	NA	NA	NA	F	NA	no	no	no	no	no	no	no
SNSD, MMG_PB	Sf._2124	1			Seifhennersdorf	Lower Oligocene	Betulaceae	Carpinus?	Betulaceae_indet	deciduous	tree	NA	NA	NA	NA	NA	F	NA	no	no	no	no	no	no	no
SNSD, MMG_PB	Sf._2132	1			Seifhennersdorf	Lower Oligocene	Betulaceae	Carpinus?	Betulaceae_indet	deciduous	tree	NA	NA	NA	NA	NA	F	NA	no	no	no	no	no	no	no
SNSD, MMG_PB	Sf._2151	1			Seifhennersdorf	Lower Oligocene	Betulaceae	Carpinus?	Betulaceae_indet	deciduous	tree	NA	NA	NA	NA	NA	F	NA	no	no	no	no	no	no	no
SNSD, MMG_PB	Sf._2153	1			Seifhennersdorf	Lower Oligocene	Betulaceae	Carpinus?	Betulaceae_indet	deciduous	tree	NA	NA	NA	NA	NA	F	NA	no	no	no	no	no	no	no
SNSD, MMG_PB	Sf._2169:1,2	1			Seifhennersdorf	Lower Oligocene	Betulaceae	Carpinus?	Betulaceae_indet	deciduous	tree	NA	NA	NA	NA	NA	F	NA	no	no	no	no	no	no	no
SNSD, MMG_PB	Sf._2179	1			Seifhennersdorf	Lower Oligocene	Betulaceae	Carpinus?	Betulaceae_indet	deciduous	tree	NA	NA	NA	NA	NA	F	NA	no	no	no	no	no	no	no
SNSD, MMG_PB	Sf._2184	1			Seifhennersdorf	Lower Oligocene	Betulaceae	Carpinus?	Betulaceae_indet	deciduous	tree	NA	NA	NA	NA	NA	F	NA	no	no	no	no	no	no	no
SNSD, MMG_PB	Sf._2190	1			Seifhennersdorf	Lower Oligocene	Betulaceae	Carpinus?	Betulaceae_indet	deciduous	tree	NA	NA	NA	NA	NA	F	NA	no	no	no	no	no	no	no
SNSD, MMG_PB	Sf._2194	1	1		Seifhennersdorf	Lower Oligocene	Betulaceae	Carpinus?	Betulaceae_indet	deciduous	tree	unlobed	dentate	pinnate	non-looped	F	F	F	no	no	no	no	no	no	no
SNSD, MMG_PB	Sf._2199	1	1		Seifhennersdorf	Lower Oligocene	Betulaceae	Carpinus?	Betulaceae_indet	deciduous	tree	unlobed	dentate	pinnate	non-looped	F	F	F	no	no	no	no	no	no	no
[truncated: 4,285 more rows]
