# Supplementary material for: An integrated leaf trait analysis of two Paleogene leaf floras
Source: PeerJ. 2023 Apr 10;11:e15140. doi: 10.7717/peerj.15140 (PMC10100813; doi:10.7717/peerj.15140)
Supplement: Supplemental Information 14 — All taxonomic, Trait Combination Type, and insect damage type determinations as well as quantitative leaf trait measurements (preservation index, leaf area, leaf mass per area, leaf length, leaf width, length/width ratio) for all studied leaves or graphical digitized leaves. [file peerj-11-15140-s014.xlsx]

## Sheet: read_me
	variable	description
Specimen stratigraphic, taxonomic and ecological (derived form modern relative) information	ID	collection number of each specimen; all specimens are stored in the palaeobotanical collection (PB) of the Senckenberg Natural History Collections Dresden (SNSD), Museum of Mineralogy and Geology (MMG)
	Locality	Name of the fossil site
	Chronostratigraphy	Geological age
	Family	taxonomic affiliation of the specimen
	Genus
	Species
	Pheno	Fossil-species phenology based on their modern relatives
	Growth_form	Fossil-species growth form based on their modern relatives
Qualitative traits	Margins	type of leaf margins (toothed vs. untoothed)
	specimen_TCT	Trait Combination Type of the specimen as observed on the fossil (see Material & Methods)
	taxon_TCT	Trait Combination Type of the specimen from taxonomic description
	combined_TCT	Trait Combination Type of the specimen, combines specimen_TCT completed by taxon_TCT, for specimen with poorly preserved secondary venation
	cat_TCT	classes of TCTs not including the type of secondary veination (e.g., specimen or taxa of TCT A and B are comparable except for their secondary veination patterns, they would be grouped in the cat_TCT "AB")
Quantitative traits	MAX_area	area of the reconstructed leaf
	log_MAX_area	log of reconstructed leaf area
	MAX_lw	length/width ratio of the reconstructed leaf
	MAX_l	length of the reconstructed leaf
	MAX_w	width of the reconstructed leaf
	MIN_area	area of the fossil leaf as preserved (in the case of fragmented leaf, surface of the fragment).
	IA	area (preservation) index = MIN_area / MAX_area (defined by Traiser et al., 2018, see Material & Methods)
	petiole_w	measured petiole width for calculation of Leaf Mass per Area with the equation of Royer et al., 2007 (see Material & Methods)
	log_LMA	log of Leaf Mass per Area as calculated with the equation of Royer et al., 2007 (see Material & Methods)
	LMA value	Indicates whether Leaf Mass per Area was calculated ("obs", petiole was preserved), predicted ("pred", with data imputation), or couldn't be retrieved ("NA")
	LMA	LMA values when calculated (obtained from Log_LMA)
	LMA_all	LMA values from calculation and imputation, variable used in multivariate analyses. Some calculated LMA were removed because they belong to rare groups (family or TCT) and couldn't be included in the analyses.
Herbivory metrics	Interaction	presence/absence of herbivory traces
	cat_DT	Class of damage types (functional feeding group)
	area_damaged	surface of leaf damaged due to herbivory interaction
	Herbivory_index	ratio between damaged and undamaged leaf area of the reconstructed leaf
	HI_min-area	ratio between damaged and undamaged area of the leaf as it is preserved
	area_hole feeding [mm²]	area of hole feeding DTs
	HI_hole feeding	herbivory index related to hole feeding
	area_margin feeding [mm²]	area of margin feeding DTs
	HI_margin feeding	herbivory index related to margin feeding
	area_skeletonization [mm²]	area of skeletonization DTs
	HI_skeletonization	herbivory index related to skeletonization
	area_surface feeding [mm²]	area of surface feeding DTs
	HI_surface feeding	herbivory index related to surface feeding
	area_leaf mining [mm²]	area of leaf ming DTs
	HI_leaf mining	herbivory index related to leaf mining

## Sheet: data
ID	Locality	Chronostratigraphy	Family	Genus	Species	Pheno	Growth_form	Margins	specimen_TCT	taxon_TCT	combined_TCT	cat_TCT	IA	MAX_area	log_MAX_area	MAX_lw	MAX_l	MAX_w	MIN_area	petiole_w	log_LMA	LMA value	LMA	Interaction	cat_DT	area_damaged	Herbivory_index	HI_min-area	area_hole feeding [mm²]	HI_hole feeding	area_margin feeding [mm²]	HI_margin feeding	area_skeletonization [mm²]	HI_skeletonization	area_surface feeding [mm²]	HI_surface feeding	area_leaf mining [mm²]	HI_leaf mining
Sf._6584	Seifhennersdorf	Lower Oligocene	Rosaceae	Rosa	Rosa_lignitum	deciduous_(deciduous)	shrub, climber, scrambler	dentate	E or F	E	E	EF	0.996749	46.3592	1.66614	2.21038	12.0626	5.45725	46.2085	na	na		na	no		0	0	0	0	0	0	0	0	0	0	0	0	0
Sf._3974:1,2	Seifhennersdorf	Lower Oligocene	Ulmaceae	Zelkova	Zelkova_zelkovifolia	deciduous_(deciduous)	tree_(tree)	dentate	F	F	F	EF	0.977677	58.0684	1.76394	2.04751	13.4293	6.55885	56.7722	na	na		na	no		0	0	0	0	0	0	0	0	0	0	0	0	0
Sf._3277:1,2	Seifhennersdorf	Lower Oligocene	Fabaceae	Leguminosites	Leguminosites_sp	na	shrub to small tree	entire	A or B	B	B	AB	0.971412	74.6529	1.87305	3.12516	17.6872	5.65962	72.5188	na	na		na	no		0	0	0	0	0	0	0	0	0	0	0	0	0
Sf._2766	Seifhennersdorf	Lower Oligocene	Fabaceae	Leguminosites	Leguminosites_sp	semi-deciduous	shrub to small tree	entire	A or B	B	B	AB	0.987101	99.3977	1.99738	3.61176	21.6475	5.99361	98.1156	0.443485	2.03722	obs	108.948	no		0	0	0	0	0	0	0	0	0	0	0	0	0
Sf._3313	Seifhennersdorf	Lower Oligocene	Betulaceae	na	Betualceae_indet	deciduous_(deciduous)	tree	dentate	F	F	F	EF	0.945835	100.874	2.00378	1.36209	14.5141	10.6557	95.4098	na	na		na	no		0	0	0	0	0	0	0	0	0	0	0	0	0
Sf._2948a	Seifhennersdorf	Lower Oligocene	Rosaceae	Rosa	Rosa_lignitum	deciduous_(deciduous)	shrub, climber, scrambler	dentate	E or F	E	E	EF	0.951769	100.941	2.00407	1.55076	14.7222	9.49356	96.0726	0.639761	2.15624	obs	143.299	no		0	0	0	0	0	0	0	0	0	0	0	0	0
Sf._1454	Seifhennersdorf	Lower Oligocene	Rosaceae	Rosa	Rosa_lignitum	deciduous_(deciduous)	shrub, climber, scrambler	dentate	E or F	E	E	EF	0.985614	120.978	2.08271	2.89419	22.4116	7.74367	119.238	na	na		na	no		0	0	0	0	0	0	0	0	0	0	0	0	0
Sf._4298	Seifhennersdorf	Lower Oligocene	Fabaceae	Leguminosites	Leguminosites_sp	evergreen_(evergreen)	shrub to small tree	entire	A or B	B	B	AB	0.997893	130.08	2.11421	2.88619	21.7796	7.54615	129.806	0.622179	2.10492	obs	127.328	no		0	0	0	0	0	0	0	0	0	0	0	0	0
Sf._7471	Seifhennersdorf	Lower Oligocene	Sapindaceae	Acer	Acer_pseudomonspessulanum	deciduous_(deciduous)	tree_(tree)	entire	K or L	K,L	K,L	KL	0.988944	177.312	2.24874	0.970349	18.9891	19.5694	175.352	na	na		na	no		0	0	0	0	0	0	0	0	0	0	0	0	0
Sf._2429	Seifhennersdorf	Lower Oligocene	Ulmaceae	Zelkova	Zelkova_zelkovifolia	deciduous_(deciduous)	tree_(tree)	dentate	F	F	F	EF	0.992038	182.616	2.26154	1.75312	23.2464	13.26	181.162	0.681769	2.07899	obs	119.948	no		0	0	0	0	0	0	0	0	0	0	0	0	0
Sf._2841	Seifhennersdorf	Lower Oligocene	Rosaceae	Rosa	Rosa_lignitum	deciduous_(deciduous)	shrub, climber, scrambler	dentate	E or F	E	E	EF	0.99753	186.215	2.27001	2.54664	26.3893	10.3624	185.755	na	na		na	no		0	0	0	0	0	0	0	0	0	0	0	0	0
Sf._140 a	Seifhennersdorf	Lower Oligocene	Rosaceae	Rosa	Rosa_lignitum	deciduous_(deciduous)	shrub, climber, scrambler	dentate	E or F	E	E	EF	0.984581	202.213	2.30581	1.706	22.0851	12.9455	199.095	na	na		na	no		0	0	0	0	0	0	0	0	0	0	0	0	0
Sf._8197	Seifhennersdorf	Lower Oligocene	Rosaceae	Rosa	Rosa_lignitum	deciduous_(deciduous)	shrub, climber, scrambler	dentate	E or F	E	E	EF	0.995339	207.402	2.31681	2.70257	28.9906	10.7271	206.436	na	na		na	no		0	0	0	0	0	0	0	0	0	0	0	0	0
Sf._2510:1,2	Seifhennersdorf	Lower Oligocene	Lauraceae	Daphnogene	Daphnogene_cinnamomifolia	evergreen_(evergreen)	shrub to small tree	entire	C or D	C,D	C,D	CD	0.943928	211.66	2.32564	4.03717	35.021	8.67464	199.791	na	na		na	no		0	0	0	0	0	0	0	0	0	0	0	0	0
Sf._8209	Seifhennersdorf	Lower Oligocene	Lauraceae	Daphnogene	Daphnogene_cinnamomifolia	evergreen_(evergreen)	shrub to small tree	entire	C or D	C,D	C,D	CD	0.996196	212.394	2.32714	5.125	41.1844	8.03598	211.586	0.946352	2.16274	obs	145.457	no		0	0	0	0	0	0	0	0	0	0	0	0	0
Sf._2342	Seifhennersdorf	Lower Oligocene	Ulmaceae	Ulmus	Ulmus_fischeri	deciduous_(deciduous)	tree_(tree)	dentate	F	F	F	EF	0.975398	228.371	2.35864	1.87119	25.0352	13.3793	222.753	na	na		na	no		0	0	0	0	0	0	0	0	0	0	0	0	0
Sf._6080	Seifhennersdorf	Lower Oligocene	Dicotyledonae fam. inc. sedis	Dicotylophyllum	Dicotylophyllum_dentate	na	na	dentate	E or F	na	E,F	EF	0.931235	229.448	2.36068	4.15399	38.7147	9.31989	213.67	na	na		na	no		0	0	0	0	0	0	0	0	0	0	0	0	0
Sf._1946	Seifhennersdorf	Lower Oligocene	Betulaceae	Carpinus	Carpinus_grandis	deciduous_(deciduous)	tree_(tree)	dentate	F	F	F	EF	0.972941	242.444	2.38461	1.73606	25.6224	14.7589	235.884	na	na		na	no		0	0	0	0	0	0	0	0	0	0	0	0	0
Sf._3381	Seifhennersdorf	Lower Oligocene	Lauraceae	Laurophyllum	Laurophyllum_sp	evergreen_(evergreen)	tree_(tree)	entire	A or B	A,B	A,B	AB	0.75718	249.888	2.39775	3.18993	34.1378	10.7017	189.21	0.711371	2.04106	obs	109.917	no		0	0	0	0	0	0	0	0	0	0	0	0	0
Sf._2594b	Seifhennersdorf	Lower Oligocene	Lauraceae	Daphnogene	Daphnogene_cinnamomifolia	evergreen_(evergreen)	shrub to small tree	entire	C or D	C,D	C,D	CD	0.918478	254.516	2.40571	4.86065	41.7424	8.58783	233.767	na	na		na	yes	surface	2.44	0.958684	1.04377	0	0	0	0	0	0	2.44	0.958684	0	0
Sf._6076	Seifhennersdorf	Lower Oligocene	Lauraceae	Laurophyllum	Laurophyllum_sp	evergreen_(evergreen)	tree_(tree)	entire	A or B	A,B	A,B	AB	0.940411	256.536	2.40915	5.20198	42.4981	8.16961	241.249	na	na		na	no		0	0	0	0	0	0	0	0	0	0	0	0	0
Sf._140 b	Seifhennersdorf	Lower Oligocene	Rosaceae	Rosa	Rosa_lignitum	deciduous_(deciduous)	shrub, climber, scrambler	dentate	E or F	E	E	EF	0.877985	261.149	2.41689	1.60899	24.6439	15.3164	229.285	0.599881	1.97719	obs	94.8834	no		0	0	0	0	0	0	0	0	0	0	0	0	0
Sf._2009 a	Seifhennersdorf	Lower Oligocene	Rosaceae	Rosa	Rosa_lignitum	deciduous_(deciduous)	shrub, climber, scrambler	dentate	E or F	E	E	EF	0.986628	261.18	2.41694	2.11523	28.4589	13.4543	257.687	na	na		na	no		0	0	0	0	0	0	0	0	0	0	0	0	0
Sf._8304	Seifhennersdorf	Lower Oligocene	Dicotyledonae fam. inc. sedis	Dicotylophyllum	Dicotylophyllum_entire	deciduous_(deciduous)	na	entire	A or B	na	A,B	AB	0.958154	261.83	2.41802	3.37875	35.6358	10.547	250.873	0.421246	1.85946	obs	72.3539	no		0	0	0	0	0	0	0	0	0	0	0	0	0
Sf._6252	Seifhennersdorf	Lower Oligocene	Fabaceae	Leguminosites	Leguminosites_sp	na	shrub to small tree	entire	A or B	B	B	AB	0.928531	263.218	2.42032	1.87146	25.7013	13.7333	244.406	na	na		na	no		0	0	0	0	0	0	0	0	0	0	0	0	0
Sf._2951	Seifhennersdorf	Lower Oligocene	Fabaceae	Leguminosites	Leguminosites_sp	na	shrub to small tree	entire	A or B	B	B	AB	0.972697	265.905	2.42473	2.67159	30.8833	11.5599	258.645	na	na		na	no		0	0	0	0	0	0	0	0	0	0	0	0	0
Sf._2348	Seifhennersdorf	Lower Oligocene	Rosaceae	Rosa	Rosa_lignitum	deciduous_(deciduous)	shrub, climber, scrambler	dentate	E or F	E	E	EF	0.989512	269.237	2.43014	3.07043	35.2158	11.4693	266.414	0.320767	1.76442	obs	58.1322	no		0	0	0	0	0	0	0	0	0	0	0	0	0
Sf._18	Seifhennersdorf	Lower Oligocene	Sapindaceae	Acer	Acer_cftricuspidatum	deciduous_(deciduous)	tree_(tree)	dentate	P	P	P	OP	0.915204	269.462	2.4305	1.10316	25.9326	23.5076	246.613	0.860752	2.0918	obs	123.537	yes	hole	2.403	0.891776	0.974402	2.403	0.891776	0	0	0	0	0	0	0	0
Sf._6232/6125	Seifhennersdorf	Lower Oligocene	Lauraceae	Laurophyllum	Laurophyllum_acutimontanum	evergreen_(evergreen)	shrub to small tree	entire	A or B	A	A	AB	0.976009	272.431	2.43526	5.38824	53.1391	9.86206	265.896	na	na		na	no		0	0	0	0	0	0	0	0	0	0	0	0	0
Sf._7254/6571	Seifhennersdorf	Lower Oligocene	Rosaceae	Rosa	Rosa_lignitum	deciduous_(deciduous)	shrub, climber, scrambler	dentate	E or F	E	E	EF	0.975265	277.58	2.44339	1.62042	25.4775	15.7228	270.714	0.570658	1.9505	obs	89.227	no		0	0	0	0	0	0	0	0	0	0	0	0	0
Sf._3737	Seifhennersdorf	Lower Oligocene	Ulmaceae	Ulmus	Ulmus_fischeri	deciduous_(deciduous)	tree_(tree)	dentate	F	F	F	EF	0.914191	286.971	2.45784	2.02307	30.6048	15.1279	262.346	0.472815	1.88257	obs	76.308	no		0	0	0	0	0	0	0	0	0	0	0	0	0
Sf._867	Seifhennersdorf	Lower Oligocene	Rosaceae	Rosa	Rosa_lignitum	deciduous_(deciduous)	shrub, climber, scrambler	dentate	E or F	E	E	EF	0.98957	287.763	2.45904	3.39175	36.8526	10.8654	284.762	0.659549	1.99255	obs	98.3	no		0	0	0	0	0	0	0	0	0	0	0	0	0
Sf._5731	Seifhennersdorf	Lower Oligocene	Juglandaceae	Carya	Carya_fragiliformis	deciduous_(deciduous)	tree_(tree)	dentate	F	F	F	EF	0.905514	299.656	2.47662	4.08128	43.6066	10.6845	271.343	na	na		na	no		0	0	0	0	0	0	0	0	0	0	0	0	0
Sf._7257	Seifhennersdorf	Lower Oligocene	Rosaceae	Rosa	Rosa_lignitum	deciduous_(deciduous)	shrub, climber, scrambler	dentate	E or F	E	E	EF	0.988401	305.826	2.48547	2.68758	35.3039	13.136	302.279	0.677476	1.99135	obs	98.0284	no		0	0	0	0	0	0	0	0	0	0	0	0	0
Sf._6255	Seifhennersdorf	Lower Oligocene	Dicotyledonae fam. inc. sedis	Dicotylophyllum	Dicotylophyllum_entire	evergreen_(evergreen)	na	entire	A or B	na	A,B	AB	0.849174	307.495	2.48784	1.81598	28.622	15.7612	261.117	0.903307	2.0859	obs	121.872	no		0	0	0	0	0	0	0	0	0	0	0	0	0
Sf._983	Seifhennersdorf	Lower Oligocene	Juglandaceae	Carya	Carya_fragiliformis	deciduous_(deciduous)	tree_(tree)	dentate	E or F	F	F	EF	0.892198	307.566	2.48794	3.43346	40.7399	11.8656	274.41	0.599168	1.94965	obs	89.0543	yes	margin	33.179	10.7876	12.091	0	0	33.179	10.7876	0	0	0	0	0	0
Sf._2336	Seifhennersdorf	Lower Oligocene	Rosaceae	Rosa	Rosa_lignitum	deciduous_(deciduous)	shrub, climber, scrambler	dentate	E	E	E	EF	0.97935	308.45	2.48918	2.37813	31.4517	13.2254	302.08	na	na		na	no		0	0	0	0	0	0	0	0	0	0	0	0	0
Sf._2768	Seifhennersdorf	Lower Oligocene	Platanaceae	Platanus	Platanus_neptuni	deciduous_(deciduous)	tree_(tree)	dentate	E	E	E	EF	0.967267	310.017	2.49139	2.6198	32.8272	12.5304	299.869	0.593286	1.94506	obs	88.1179	no		0	0	0	0	0	0	0	0	0	0	0	0	0
Sf._4523	Seifhennersdorf	Lower Oligocene	Sapindaceae	Acer	Acer_angustilobum	deciduous_(deciduous)	tree_(tree)	dentate	P	P	P	OP	0.899774	311.326	2.49322	1.50158	32.7829	21.8323	280.123	0.642594	1.97086	obs	93.5094	no		0	0	0	0	0	0	0	0	0	0	0	0	0
Sf._2780	Seifhennersdorf	Lower Oligocene	Rosaceae	Rosa	Rosa_lignitum	deciduous_(deciduous)	shrub, climber, scrambler	dentate	E	E	E	EF	0.977975	319.637	2.50466	1.50902	26.1527	17.3309	312.597	na	na		na	no		0	0	0	0	0	0	0	0	0	0	0	0	0
Sf._5764	Seifhennersdorf	Lower Oligocene	Rosaceae	Rosa	Rosa_lignitum	deciduous_(deciduous)	shrub, climber, scrambler	dentate	E	E	E	EF	0.991756	322.644	2.50872	3.41737	39.6017	11.5884	319.984	na	na		na	no		0	0	0	0	0	0	0	0	0	0	0	0	0
Sf._1912	Seifhennersdorf	Lower Oligocene	Betulaceae	Carpinus	Carpinus_grandis	deciduous_(deciduous)	tree_(tree)	dentate	F	F	F	EF	0.963561	337.969	2.52888	1.45721	26.4552	18.1547	325.654	na	na		na	no		0	0	0	0	0	0	0	0	0	0	0	0	0
Sf._5539	Seifhennersdorf	Lower Oligocene	Juglandaceae	Carya	Carya_fragiliformis	deciduous_(deciduous)	tree_(tree)	dentate	F	F	F	EF	0.932328	349.207	2.54308	2.45207	36.0867	14.7168	325.576	na	na		na	no		0	0	0	0	0	0	0	0	0	0	0	0	0
Sf._6059	Seifhennersdorf	Lower Oligocene	Rosaceae	Rosa	Rosa_lignitum	deciduous_(deciduous)	shrub, climber, scrambler	dentate	E or F	E	E	EF	0.994177	351.807	2.5463	2.18107	33.2885	15.2624	349.758	0.773635	2.01215	obs	102.838	no		0	0	0	0	0	0	0	0	0	0	0	0	0
Sf._4235	Seifhennersdorf	Lower Oligocene	Juglandaceae	Carya	Carya_fragiliformis	deciduous_(deciduous)	tree_(tree)	dentate	E or F	F	F	EF	1	352.459	2.54711	3.85605	46.4736	12.0521	352.459	na	na		na	no		0	0	0	0	0	0	0	0	0	0	0	0	0
Sf._2754	Seifhennersdorf	Lower Oligocene	Platanaceae	Platanus	Platanus_neptuni	deciduous_(deciduous)	tree_(tree)	dentate	E	E	E	EF	0.997026	352.941	2.5477	3.00277	39.7861	13.2498	351.891	na	na		na	no		0	0	0	0	0	0	0	0	0	0	0	0	0
Sf._5422	Seifhennersdorf	Lower Oligocene	Juglandaceae	Carya	Carya_fragiliformis	deciduous_(deciduous)	tree_(tree)	dentate	F	F	F	EF	0.892498	362.015	2.55873	3.42713	46.6973	13.6258	323.098	na	na		na	no		0	0	0	0	0	0	0	0	0	0	0	0	0
Sf._1133	Seifhennersdorf	Lower Oligocene	Salicaceae	Salix	Salix_varians	deciduous_(deciduous)	shrub to small tree	dentate	E or F	F	F	EF	0.853172	368.378	2.56629	1.89471	38.6954	20.4229	314.29	na	na		na	no		0	0	0	0	0	0	0	0	0	0	0	0	0
Sf._8288	Seifhennersdorf	Lower Oligocene	Lauraceae	Daphnogene	Daphnogene_cinnamomifolia	evergreen_(evergreen)	shrub to small tree	entire	C or D	C,D	C,D	CD	0.960499	372.135	2.5707	5.16567	53.7468	10.4046	357.435	1.33628	2.18418	obs	152.819	yes	margin	6.142	1.65048	1.71835	0	0	6.142	1.65048	0	0	0	0	0	0
Sf._1155	Seifhennersdorf	Lower Oligocene	Juglandaceae	Carya	Carya_fragiliformis	deciduous_(deciduous)	tree_(tree)	dentate	F	F	F	EF	0.852128	376.069	2.57527	4.52621	54.6897	12.0829	320.459	na	na		na	yes	margin	48.2	12.8168	15.0409	0	0	48.2	12.8168	0	0	0	0	0	0
Sf._8570	Seifhennersdorf	Lower Oligocene	Ulmaceae	Zelkova	Zelkova_zelkovifolia	deciduous_(deciduous)	tree_(tree)	dentate	F	F	F	EF	0.946673	376.966	2.5763	3.485	44.7854	12.8509	356.863	na	na		na	no		0	0	0	0	0	0	0	0	0	0	0	0	0
Sf._7204:1,2	Seifhennersdorf	Lower Oligocene	Ulmaceae	Ulmus	Ulmus_fischeri	deciduous_(deciduous)	tree_(tree)	dentate	F	F	F	EF	0.963669	385	2.58546	1.89336	32.9539	17.405	371.013	0.80875	2.01192	obs	102.784	no		0	0	0	0	0	0	0	0	0	0	0	0	0
Sf._6258	Seifhennersdorf	Lower Oligocene	Fabaceae	Leguminosites	Leguminosites_sp	na	shrub to small tree	entire	B	B	B	AB	0.957136	392.214	2.59352	2.38314	35.3747	14.8437	375.402	na	na		na	no		0	0	0	0	0	0	0	0	0	0	0	0	0
Sf._2975	Seifhennersdorf	Lower Oligocene	Rosaceae	Rosa	Rosa_lignitum	deciduous_(deciduous)	shrub, climber, scrambler	dentate	E or F	E	E	EF	0.93621	401.05	2.6032	2.68561	39.3673	14.6586	375.466	0.42594	1.7924	obs	62.0013	no		0	0	0	0	0	0	0	0	0	0	0	0	0
Sf._7258	Seifhennersdorf	Lower Oligocene	Ulmaceae	Ulmus	Ulmus_fischeri	deciduous_(deciduous)	tree_(tree)	dentate	F	F	F	EF	0.895192	401.335	2.60351	2.22706	40.0715	17.993	359.272	na	na		na	no		0	0	0	0	0	0	0	0	0	0	0	0	0
Sf._27	Seifhennersdorf	Lower Oligocene	Juglandaceae	Carya	Carya_fragiliformis	deciduous_(deciduous)	tree_(tree)	dentate	F	F	F	EF	0.985182	401.385	2.60356	2.21523	36.3064	16.3894	395.438	0.683536	1.9492	obs	88.9605	no		0	0	0	0	0	0	0	0	0	0	0	0	0
Sf._4086	Seifhennersdorf	Lower Oligocene	Sapindaceae	Acer	Acer_cftricuspidatum	deciduous_(deciduous)	tree_(tree)	dentate	P	P	P	OP	0.938713	415.043	2.61809	1.20318	30.7375	25.5468	389.607	na	na		na	no		0	0	0	0	0	0	0	0	0	0	0	0	0
Sf._3488	Seifhennersdorf	Lower Oligocene	Fabaceae	Leguminosites	Leguminosites_sp	evergreen_(evergreen)	shrub to small tree	entire	A or B	B	B	AB	0.980594	416.099	2.6192	1.56694	30.2626	19.3132	408.024	1.17303	2.12242	obs	132.562	no		0	0	0	0	0	0	0	0	0	0	0	0	0
Sf._2932:1,2	Seifhennersdorf	Lower Oligocene	Fabaceae	Leguminosites	Leguminosites_sp	deciduous_(deciduous)	shrub to small tree	entire	A or B	B	B	AB	0.983825	419.721	2.62296	2.46022	35.8663	14.5785	412.932	0.462517	1.81219	obs	64.8913	no		0	0	0	0	0	0	0	0	0	0	0	0	0
Sf._8222	Seifhennersdorf	Lower Oligocene	Ulmaceae	Ulmus	Ulmus_fischeri	deciduous_(deciduous)	tree_(tree)	dentate	F	F	F	EF	0.873551	423.283	2.62663	2.49729	39.5604	15.8413	369.759	na	na		na	no		0	0	0	0	0	0	0	0	0	0	0	0	0
Sf._4807	Seifhennersdorf	Lower Oligocene	Betulaceae	Carpinus	Carpinus_roscheri	deciduous_(deciduous)	tree_(tree)	dentate	F	F	F	EF	0.976795	423.515	2.62687	1.93887	37.2838	19.2296	413.687	0.801825	1.99325	obs	98.4584	no		0	0	0	0	0	0	0	0	0	0	0	0	0
Sf._5654	Seifhennersdorf	Lower Oligocene	Juglandaceae	Carya	Carya_fragiliformis	deciduous_(deciduous)	tree_(tree)	dentate	F	F	F	EF	0.988062	429.822	2.63329	3.58986	48.4756	13.5035	424.691	na	na		na	no		0	0	0	0	0	0	0	0	0	0	0	0	0
Sf._8211	Seifhennersdorf	Lower Oligocene	Lauraceae	Daphnogene	Daphnogene_cinnamomifolia	evergreen_(evergreen)	shrub to small tree	entire	C or D	C,D	C,D	CD	0.876237	431.754	2.63524	3.73184	48.5832	13.0186	378.319	1.37687	2.16945	obs	147.725	no		0	0	0	0	0	0	0	0	0	0	0	0	0
Sf._6259	Seifhennersdorf	Lower Oligocene	Fabaceae	Leguminosites	Leguminosites_sp	na	shrub to small tree	entire	A or B	B	B	AB	0.923708	432.328	2.63581	1.97917	33.4732	16.9128	399.345	na	na		na	no		0	0	0	0	0	0	0	0	0	0	0	0	0
Sf._3422:1,2	Seifhennersdorf	Lower Oligocene	Ulmaceae	Zelkova	Zelkova_zelkovifolia	deciduous_(deciduous)	tree_(tree)	dentate	F	F	F	EF	0.976599	433.292	2.63678	2.09547	39.7243	18.9572	423.153	na	na		na	no		0	0	0	0	0	0	0	0	0	0	0	0	0
Sf._5485	Seifhennersdorf	Lower Oligocene	Juglandaceae	Carya	Carya_fragiliformis	deciduous_(deciduous)	tree_(tree)	dentate	F	F	F	EF	0.945433	438.597	2.64207	2.79455	46.1497	16.5142	414.664	na	na		na	no		0	0	0	0	0	0	0	0	0	0	0	0	0
Sf._4490	Seifhennersdorf	Lower Oligocene	Sapindaceae	Acer	Acer_pseudomonspessulanum	deciduous_(deciduous)	tree_(tree)	entire	O	K,L	O	OP	0.776989	441.204	2.64464	0.61065	26.1422	42.8104	342.81	na	na		na	no		0	0	0	0	0	0	0	0	0	0	0	0	0
Sf._8207	Seifhennersdorf	Lower Oligocene	Lauraceae	Daphnogene	Daphnogene_cinnamomifolia	evergreen_(evergreen)	shrub to small tree	entire	C or D	C,D	C,D	CD	0.858517	445.522	2.64887	4.41068	58.4519	13.2524	382.488	na	na		na	no		0	0	0	0	0	0	0	0	0	0	0	0	0
Sf._4678	Seifhennersdorf	Lower Oligocene	Sapindaceae	Acer	Acer_palaeosaccharinum	deciduous_(deciduous)	tree_(tree)	dentate	P	P	P	OP	0.940758	452.602	2.65572	0.888595	29.2682	32.9376	425.788	na	na		na	no		0	0	0	0	0	0	0	0	0	0	0	0	0
Sf._8210	Seifhennersdorf	Lower Oligocene	Lauraceae	Laurophyllum	Laurophyllum_sp	evergreen_(evergreen)	tree_(tree)	entire	A	A,B	A	AB	0.912112	452.656	2.65577	4.00908	51.9503	12.9582	412.874	na	na		na	no		0	0	0	0	0	0	0	0	0	0	0	0	0
Sf._4719	Seifhennersdorf	Lower Oligocene	Betulaceae	Betula	Betula_alboides	deciduous_(deciduous)	tree_(tree)	dentate	F	F	F	EF	0.997013	452.677	2.65579	1.8281	35.7611	19.5619	451.325	0.460263	1.79803	obs	62.8095	no		0	0	0	0	0	0	0	0	0	0	0	0	0
Sf._3627:1,2	Seifhennersdorf	Lower Oligocene	Ulmaceae	Ulmus	Ulmus_fischeri	deciduous_(deciduous)	tree_(tree)	dentate	F	F	F	EF	0.935954	456.34	2.65929	1.86712	38.0034	20.354	427.114	0.578531	1.87257	obs	74.5709	no		0	0	0	0	0	0	0	0	0	0	0	0	0
Sf._2175:1,2	Seifhennersdorf	Lower Oligocene	Betulaceae	Carpinus	Carpinus_grandis	deciduous_(deciduous)	tree_(tree)	dentate	F	F	F	EF	0.96797	459.982	2.66274	1.68144	36.0511	21.4406	445.248	na	na		na	no		0	0	0	0	0	0	0	0	0	0	0	0	0
Sf._8188	Seifhennersdorf	Lower Oligocene	Juglandaceae	Carya	Carya_fragiliformis	deciduous_(deciduous)	tree_(tree)	dentate	F	F	F	EF	0.996656	464.017	2.66653	3.08628	46.4711	15.0573	462.465	0.533105	1.84267	obs	69.6096	no		0	0	0	0	0	0	0	0	0	0	0	0	0
Sf._1056/972	Seifhennersdorf	Lower Oligocene	Juglandaceae	Carya	Carya_fragiliformis	deciduous_(deciduous)	tree_(tree)	dentate	F	F	F	EF	0.911338	473.238	2.67508	2.90332	44.5348	15.3392	431.28	na	na		na	no		0	0	0	0	0	0	0	0	0	0	0	0	0
Sf._8329	Seifhennersdorf	Lower Oligocene	Juglandaceae	Carya	Carya_fragiliformis	deciduous_(deciduous)	tree_(tree)	dentate	F	F	F	EF	0.981178	474.873	2.67658	3.42604	51.4132	15.0066	465.935	na	na		na	no		0	0	0	0	0	0	0	0	0	0	0	0	0
Sf._2363a	Seifhennersdorf	Lower Oligocene	Rosaceae	Rosa	Rosa_lignitum	deciduous_(deciduous)	shrub, climber, scrambler	dentate	E or F	E	E	EF	0.955034	475.629	2.67727	2.20754	39.6281	17.9512	454.242	na	na		na	yes	margin	14.197	2.98489	3.12543	0	0	14.197	2.98489	0	0	0	0	0	0
Sf._8338	Seifhennersdorf	Lower Oligocene	Ulmaceae	Ulmus	Ulmus_fischeri	deciduous_(deciduous)	tree_(tree)	dentate	F	F	F	EF	0.986321	481.702	2.68278	1.769	38.2067	21.5979	475.113	0.96989	2.03503	obs	108.401	no		0	0	0	0	0	0	0	0	0	0	0	0	0
Sf._2539a	Seifhennersdorf	Lower Oligocene	Lauraceae	Laurophyllum	Laurophyllum_sp	evergreen_(evergreen)	tree_(tree)	entire	A	A,B	A	AB	0.885083	484.176	2.685	3.28787	65.5293	19.9306	428.536	na	na		na	no		0	0	0	0	0	0	0	0	0	0	0	0	0
Sf._1047:1,2a	Seifhennersdorf	Lower Oligocene	Juglandaceae	Carya	Carya_fragiliformis	deciduous_(deciduous)	tree_(tree)	dentate	F	F	F	EF	0.912521	484.847	2.6856	3.60639	52.0938	14.4449	442.433	na	na		na	no		0	0	0	0	0	0	0	0	0	0	0	0	0
Sf._2821:1,2	Seifhennersdorf	Lower Oligocene	Fabaceae	Leguminosites	Leguminosites_sp	deciduous_(deciduous)	shrub to small tree	entire	A or B	B	B	AB	0.97861	485.624	2.6863	2.20037	39.0961	17.768	475.236	0.522475	1.82844	obs	67.3651	no		0	0	0	0	0	0	0	0	0	0	0	0	0
Sf._6535:1,2	Seifhennersdorf	Lower Oligocene	Rosaceae	Rosa	Rosa_lignitum	deciduous_(deciduous)	shrub, climber, scrambler	dentate	E	E	E	EF	0.998198	486.36	2.68696	2.16298	38.3678	17.7384	485.483	0.706372	1.92824	obs	84.7703	no		0	0	0	0	0	0	0	0	0	0	0	0	0
Sf._5990	Seifhennersdorf	Lower Oligocene	Lauraceae	Daphnogene	Daphnogene_cinnamomifolia	evergreen_(evergreen)	shrub to small tree	entire	C	C,D	C	CD	0.785476	488.031	2.68845	5.49685	61.9507	11.2702	383.336	na	na		na	no		0	0	0	0	0	0	0	0	0	0	0	0	0
Sf._5469	Seifhennersdorf	Lower Oligocene	Juglandaceae	Carya	Carya_fragiliformis	deciduous_(deciduous)	tree_(tree)	dentate	E or F	F	F	EF	0.881531	489.939	2.69014	3.50022	50.732	14.4939	431.896	na	na		na	no		0	0	0	0	0	0	0	0	0	0	0	0	0
Sf._7952	Seifhennersdorf	Lower Oligocene	Platanaceae	Platanus	Platanus_neptuni	deciduous_(deciduous)	tree_(tree)	dentate	E	E	E	EF	0.889088	490.155	2.69033	2.83956	45.3259	15.9623	435.791	na	na		na	no		0	0	0	0	0	0	0	0	0	0	0	0	0
Sf._2383	Seifhennersdorf	Lower Oligocene	Ulmaceae	Ulmus	Ulmus_fischeri	deciduous_(deciduous)	tree_(tree)	dentate	F	F	F	EF	0.970004	491.322	2.69137	1.76662	36.8065	20.8344	476.585	na	na		na	no		0	0	0	0	0	0	0	0	0	0	0	0	0
Sf._7225/7230	Seifhennersdorf	Lower Oligocene	Ulmaceae	Zelkova	Zelkova_zelkovifolia	deciduous_(deciduous)	tree_(tree)	dentate	F	F	F	EF	0.949073	493.743	2.6935	2.15658	42.7575	19.8266	468.598	0.615685	1.88015	obs	75.8844	no		0	0	0	0	0	0	0	0	0	0	0	0	0
Sf._925:1,2a	Seifhennersdorf	Lower Oligocene	Juglandaceae	Carya	Carya_fragiliformis	deciduous_(deciduous)	tree_(tree)	dentate	F	F	F	EF	0.958374	497.33	2.69664	3.1594	51.8476	16.4106	476.628	1.05245	2.05684	obs	113.984	no		0	0	0	0	0	0	0	0	0	0	0	0	0
Sf._906	Seifhennersdorf	Lower Oligocene	Juglandaceae	Carya	Carya_fragiliformis	deciduous_(deciduous)	tree_(tree)	dentate	F	F	F	EF	0.981746	497.708	2.69697	4.505	58.8873	13.0715	488.623	0.759316	1.9484	obs	88.797	no		0	0	0	0	0	0	0	0	0	0	0	0	0
Sf._4297:1,2	Seifhennersdorf	Lower Oligocene	Ulmaceae	Zelkova	Zelkova_zelkovifolia	deciduous_(deciduous)	tree_(tree)	dentate	F	F	F	EF	0.985531	500.103	2.69906	2.43783	44.4494	18.2332	492.866	0.874341	1.9944	obs	98.7196	no		0	0	0	0	0	0	0	0	0	0	0	0	0
Sf._6250:1,2	Seifhennersdorf	Lower Oligocene	Dicotyledonae fam. inc. sedis	Dicotylophyllum	Dicotylophyllum_entire	deciduous_(deciduous)	na	entire	A	na	A	AB	0.945045	506.675	2.70473	2.14838	40.6588	18.9253	478.83	0.680596	1.90912	obs	81.1187	no		0	0	0	0	0	0	0	0	0	0	0	0	0
Sf._6522	Seifhennersdorf	Lower Oligocene	Ebenaceae	Diospyros	Diospyros_sp	deciduous_(deciduous)	tree_(tree)	entire	B	B	B	AB	0.817264	511.105	2.70851	2.9785	48.784	16.3787	417.707	na	na		na	no		0	0	0	0	0	0	0	0	0	0	0	0	0
Sf._1705	Seifhennersdorf	Lower Oligocene	Betulaceae	Betula	Betula_alboides	deciduous_(deciduous)	tree_(tree)	dentate	F	F	F	EF	0.987656	512.543	2.70973	1.60941	36.8623	22.9043	506.216	na	na		na	no		0	0	0	0	0	0	0	0	0	0	0	0	0
Sf._38	Seifhennersdorf	Lower Oligocene	Sapindaceae	Acer	Acer_cftricuspidatum	deciduous_(deciduous)	tree_(tree)	dentate	P	P	P	OP	0.737596	513.397	2.71045	1.00381	34.1343	34.0046	378.68	na	na		na	no		0	0	0	0	0	0	0	0	0	0	0	0	0
Sf._4317	Seifhennersdorf	Lower Oligocene	Lauraceae	Daphnogene	Daphnogene_cinnamomifolia	evergreen_(evergreen)	shrub to small tree	entire	C or D	C,D	C,D	CD	0.969669	518.33	2.71461	5.03518	62.13	12.3392	502.608	0.993445	2.03084	obs	107.359	no		0	0	0	0	0	0	0	0	0	0	0	0	0
Sf._2033	Seifhennersdorf	Lower Oligocene	Betulaceae	Carpinus	Carpinus_grandis	deciduous_(deciduous)	tree_(tree)	dentate	F	F	F	EF	0.944998	523.909	2.71926	1.84298	38.621	20.9557	495.093	0.514703	1.81087	obs	64.6955	no		0	0	0	0	0	0	0	0	0	0	0	0	0
Sf._5407	Seifhennersdorf	Lower Oligocene	Juglandaceae	Carya	Carya_fragiliformis	deciduous_(deciduous)	tree_(tree)	dentate	F	F	F	EF	0.963233	526.572	2.72146	3.95568	56.8239	14.3651	507.211	na	na		na	no		0	0	0	0	0	0	0	0	0	0	0	0	0
Sf._3730	Seifhennersdorf	Lower Oligocene	Betulaceae	Betula	Betula_alboides	deciduous_(deciduous)	tree_(tree)	dentate	F	F	F	EF	0.937293	527.138	2.72192	1.58212	37.5196	23.7148	494.083	0.743229	1.93176	obs	85.46	no		0	0	0	0	0	0	0	0	0	0	0	0	0
Sf._2321	Seifhennersdorf	Lower Oligocene	Platanaceae	Platanus	Platanus_neptuni	deciduous_(deciduous)	tree_(tree)	dentate	E or F	E	E	EF	0.914655	535.601	2.72884	3.57872	54.3195	15.1785	489.89	1.16583	2.07849	obs	119.81	no		0	0	0	0	0	0	0	0	0	0	0	0	0
Sf._7238	Seifhennersdorf	Lower Oligocene	Rosaceae	Rosa	Rosa_lignitum	deciduous_(deciduous)	shrub, climber, scrambler	dentate	E	E	E	EF	0.975814	536.831	2.72984	3.46187	51.4836	14.8716	523.847	na	na		na	no		0	0	0	0	0	0	0	0	0	0	0	0	0
Sf._2601	Seifhennersdorf	Lower Oligocene	Lauraceae	Daphnogene	Daphnogene_cinnamomifolia	evergreen_(evergreen)	shrub to small tree	entire	C or D	C,D	C,D	CD	0.986517	538.927	2.73153	3.46516	52.4261	15.1295	531.661	1.09029	2.05524	obs	113.563	no		0	0	0	0	0	0	0	0	0	0	0	0	0
Sf._3357	Seifhennersdorf	Lower Oligocene	Fabaceae	Leguminosites	Leguminosites_sp	evergreen_(evergreen)	shrub to small tree	entire	B	B	B	AB	0.982474	543.289	2.73503	2.13428	42.0226	19.6894	533.768	1.59723	2.18059	obs	151.563	no		0	0	0	0	0	0	0	0	0	0	0	0	0
Sf._2820	Seifhennersdorf	Lower Oligocene	Fabaceae	Leguminosites	Leguminosites_sp	semi-deciduous	shrub to small tree	entire	A or B	B	B	AB	0.912419	550.244	2.74056	1.98246	40.2376	20.2968	502.053	0.864435	1.97477	obs	94.3564	no		0	0	0	0	0	0	0	0	0	0	0	0	0
Sf._5425	Seifhennersdorf	Lower Oligocene	Juglandaceae	Carya	Carya_fragiliformis	deciduous_(deciduous)	tree_(tree)	dentate	F	F	F	EF	0.988667	554.876	2.7442	2.3077	45.8309	19.86	548.587	na	na		na	no		0	0	0	0	0	0	0	0	0	0	0	0	0
Sf._7845	Seifhennersdorf	Lower Oligocene	Ulmaceae	Ulmus	Ulmus_fischeri	deciduous_(deciduous)	tree_(tree)	dentate	F	F	F	EF	0.957565	556.405	2.74539	1.92867	40.0132	20.7465	532.794	na	na		na	no		0	0	0	0	0	0	0	0	0	0	0	0	0
Sf._5076	Seifhennersdorf	Lower Oligocene	Betulaceae	Carpinus	Carpinus_roscheri	deciduous_(deciduous)	tree_(tree)	dentate	F	F	F	EF	0.954017	574.409	2.75922	1.70585	38.3725	22.4947	547.996	na	na		na	no		0	0	0	0	0	0	0	0	0	0	0	0	0
Sf._1322	Seifhennersdorf	Lower Oligocene	Juglandaceae	Carya	Carya_fragiliformis	deciduous_(deciduous)	tree_(tree)	dentate	F	F	F	EF	0.929984	578.352	2.76219	2.99919	54.9844	18.3331	537.858	0.651538	1.87269	obs	74.592	no		0	0	0	0	0	0	0	0	0	0	0	0	0
Sf._6414	Seifhennersdorf	Lower Oligocene	Platanaceae	Platanus	Platanus_neptuni	deciduous_(deciduous)	tree_(tree)	dentate	E	E	E	EF	0.831472	580.035	2.76345	2.28205	50.435	22.1007	482.283	1.84488	2.21756	obs	165.029	no		0	0	0	0	0	0	0	0	0	0	0	0	0
Sf._2380	Seifhennersdorf	Lower Oligocene	Rosaceae	Rosa	Rosa_lignitum	deciduous_(deciduous)	shrub, climber, scrambler	dentate	E or F	E	E	EF	0.964923	581.58	2.76461	2.18339	43.9904	20.1478	561.18	na	na		na	yes	margin	16.561	2.84759	2.9511	0	0	16.561	2.84759	0	0	0	0	0	0
Sf._1014	Seifhennersdorf	Lower Oligocene	Juglandaceae	Carya	Carya_fragiliformis	deciduous_(deciduous)	tree_(tree)	dentate	F	F	F	EF	0.947565	584.309	2.76664	5.15473	67.4899	13.0928	553.671	0.677168	1.88379	obs	76.5234	no		0	0	0	0	0	0	0	0	0	0	0	0	0
Sf._1502	Seifhennersdorf	Lower Oligocene	Juglandaceae	Carya	Carya_fragiliformis	deciduous_(deciduous)	tree_(tree)	dentate	F	F	F	EF	0.893105	584.503	2.76679	2.57659	47.2083	18.322	522.023	na	na		na	no		0	0	0	0	0	0	0	0	0	0	0	0	0
Sf._1921	Seifhennersdorf	Lower Oligocene	Betulaceae	Carpinus	Carpinus_grandis	deciduous_(deciduous)	tree_(tree)	dentate	F	F	F	EF	0.872555	592.289	2.77253	1.42772	34.8542	24.4125	516.805	na	na		na	no		0	0	0	0	0	0	0	0	0	0	0	0	0
Sf._3507:1,2	Seifhennersdorf	Lower Oligocene	Betulaceae	Alnus	Alnus_phocaeensis	deciduous_(deciduous)	tree_(tree)	dentate	F	F	F	EF	0.832778	596.781	2.77582	1.16625	30.9511	26.5391	496.986	na	na		na	no		0	0	0	0	0	0	0	0	0	0	0	0	0
Sf._2379	Seifhennersdorf	Lower Oligocene	Ulmaceae	Ulmus	Ulmus_fischeri	deciduous_(deciduous)	tree_(tree)	dentate	F	F	F	EF	0.872734	598.695	2.77721	1.83812	39.2473	21.3518	522.501	na	na		na	no		0	0	0	0	0	0	0	0	0	0	0	0	0
Sf._908:1,2	Seifhennersdorf	Lower Oligocene	Juglandaceae	Carya	Carya_fragiliformis	deciduous_(deciduous)	tree_(tree)	dentate	F	F	F	EF	0.984113	599.452	2.77775	3.91188	62.9976	16.1042	589.929	0.922876	1.98227	obs	95.9991	no		0	0	0	0	0	0	0	0	0	0	0	0	0
Sf._8411b	Seifhennersdorf	Lower Oligocene	Dicotyledonae fam. inc. sedis	Dicotylophyllum	Dicotylophyllum_dentate	semi-deciduous	na	entire	F	na	F	EF	0.929134	604.731	2.78156	2.59213	47.1455	18.1879	561.877	0.932761	1.98435	obs	96.4601	no		0	0	0	0	0	0	0	0	0	0	0	0	0
Sf._6138	Seifhennersdorf	Lower Oligocene	Lauraceae	Laurophyllum	Laurophyllum_sp	evergreen_(evergreen)	tree_(tree)	entire	A	A,B	A	AB	0.841979	611.157	2.78615	6.33256	84.1738	13.2922	514.581	na	na		na	no		0	0	0	0	0	0	0	0	0	0	0	0	0
Sf._6405	Seifhennersdorf	Lower Oligocene	Platanaceae	Platanus	Platanus_neptuni	deciduous_(deciduous)	tree_(tree)	dentate	E or F	E	E	EF	0.99051	613.313	2.78768	3.96742	62.5714	15.7713	607.492	na	na		na	no		0	0	0	0	0	0	0	0	0	0	0	0	0
Sf._669:1,4a	Seifhennersdorf	Lower Oligocene	Betulaceae	Betula	Betula_alboides	deciduous_(deciduous)	tree_(tree)	dentate	F	F	F	EF	0.868081	619.826	2.79227	1.96028	45.1889	23.0523	538.059	0.784697	1.92291	obs	83.7347	yes	hole	16.16	2.60718	3.00339	16.16	2.60718	0	0	0	0	0	0	0	0
Sf._5813	Seifhennersdorf	Lower Oligocene	Juglandaceae	Carya	Carya_fragiliformis	deciduous_(deciduous)	tree_(tree)	dentate	F	F	F	EF	0.988529	623.454	2.7948	2.60452	50.6843	19.4601	616.302	na	na		na	no		0	0	0	0	0	0	0	0	0	0	0	0	0
Sf._8416 (I):1,2	Seifhennersdorf	Lower Oligocene	Cannabaceae	Celtis	Celtis_pirskenbergensis	deciduous_(deciduous)	tree_(tree)	dentate	E	E,F,H	E	EF	0.963461	635.069	2.80282	3.46511	63.2311	18.2479	611.865	1.19194	2.05758	obs	114.178	no		0	0	0	0	0	0	0	0	0	0	0	0	0
Sf._23a	Seifhennersdorf	Lower Oligocene	Juglandaceae	Carya	Carya_fragiliformis	deciduous_(deciduous)	tree_(tree)	dentate	F	F	F	EF	0.989505	636.671	2.80392	2.8524	60.2731	21.1306	629.989	na	na		na	no		0	0	0	0	0	0	0	0	0	0	0	0	0
Sf._6613	Seifhennersdorf	Lower Oligocene	Dicotyledonae fam. inc. sedis	Dicotylophyllum	Dicotylophyllum_dentate	na	na	dentate	E	na	E	EF	0.88099	642.627	2.80796	2.80662	50.3695	17.9467	566.148	na	na		na	no		0	0	0	0	0	0	0	0	0	0	0	0	0
Sf._1124	Seifhennersdorf	Lower Oligocene	Juglandaceae	Carya	Carya_fragiliformis	deciduous_(deciduous)	tree_(tree)	dentate	F	F	F	EF	0.942341	644.002	2.80889	3.95896	63.2631	15.9797	606.869	0.577076	1.81459	obs	65.251	no		0	0	0	0	0	0	0	0	0	0	0	0	0
Sf._3314	Seifhennersdorf	Lower Oligocene	Betulaceae	Carpinus	Carpinus_grandis	deciduous_(deciduous)	tree_(tree)	dentate	F	F	F	EF	0.971402	649.398	2.81251	1.26267	33.935	26.8756	630.827	1.052	2.01244	obs	102.906	no		0	0	0	0	0	0	0	0	0	0	0	0	0
Sf._2526 (I)	Seifhennersdorf	Lower Oligocene	Juglandaceae	Carya	Carya_fragiliformis	deciduous_(deciduous)	tree_(tree)	dentate	F	F	F	EF	0.969448	663.064	2.82156	4.27479	75.224	17.5971	642.806	na	na		na	no		0	0	0	0	0	0	0	0	0	0	0	0	0
Sf._5442	Seifhennersdorf	Lower Oligocene	Juglandaceae	Carya	Carya_fragiliformis	deciduous_(deciduous)	tree_(tree)	dentate	F	F	F	EF	0.953356	664.223	2.82231	2.75301	57.6442	20.9386	633.241	na	na		na	no		0	0	0	0	0	0	0	0	0	0	0	0	0
Sf._8153:1,2	Seifhennersdorf	Lower Oligocene	Betulaceae	Carpinus	Carpinus_grandis	deciduous_(deciduous)	tree_(tree)	dentate	F	F	F	EF	0.963523	666.05	2.82351	1.8899	44.1725	23.373	641.754	na	na		na	no		0	0	0	0	0	0	0	0	0	0	0	0	0
Sf._6065a	Seifhennersdorf	Lower Oligocene	Lauraceae	Laurophyllum	Laurophyllum_sp	evergreen_(evergreen)	tree_(tree)	entire	A or B	A,B	A,B	AB	0.780303	680.278	2.83269	4.90406	70.6126	14.3988	530.823	1.59723	2.14329	obs	139.087	no		0	0	0	0	0	0	0	0	0	0	0	0	0
Sf._2377	Seifhennersdorf	Lower Oligocene	Cannabaceae	Celtis	Celtis_pirskenbergensis	deciduous_(deciduous)	tree_(tree)	dentate	E	E,F,H	E	EF	0.951583	681.477	2.83345	3.27904	62.6999	19.1214	648.483	1.06733	2.00924	obs	102.151	no		0	0	0	0	0	0	0	0	0	0	0	0	0
Sf._6150b	Seifhennersdorf	Lower Oligocene	Platanaceae	Platanus	Platanus_neptuni	deciduous_(deciduous)	tree_(tree)	dentate	E or F	E	E	EF	0.994461	682.197	2.83391	3.55912	60.3252	16.9495	678.419	1.27689	2.06855	obs	117.097	no		0	0	0	0	0	0	0	0	0	0	0	0	0
Sf._4971:1,2	Seifhennersdorf	Lower Oligocene	Betulaceae	Carpinus	Carpinus_grandis	deciduous_(deciduous)	tree_(tree)	dentate	F	F	F	EF	0.940164	683.42	2.83469	1.44875	38.3668	26.4826	642.527	na	na		na	no		0	0	0	0	0	0	0	0	0	0	0	0	0
Sf._1738	Seifhennersdorf	Lower Oligocene	Betulaceae	Carpinus	Carpinus_grandis	deciduous_(deciduous)	tree_(tree)	dentate	F	F	F	EF	0.992345	687.202	2.83708	1.57077	41.8743	26.6585	681.941	0.820789	1.92071	obs	83.3118	no		0	0	0	0	0	0	0	0	0	0	0	0	0
Sf._7846	Seifhennersdorf	Lower Oligocene	Betulaceae	Carpinus	Carpinus_grandis	deciduous_(deciduous)	tree_(tree)	dentate	F	F	F	EF	0.833191	692.321	2.84031	1.43289	37.475	26.1534	576.836	1.04246	1.9988	obs	99.724	no		0	0	0	0	0	0	0	0	0	0	0	0	0
Sf._3506:1,2	Seifhennersdorf	Lower Oligocene	Betulaceae	Carpinus	Carpinus_roscheri	deciduous_(deciduous)	tree_(tree)	dentate	F	F	F	EF	0.988441	692.684	2.84054	1.48593	39.807	26.7893	684.677	0.707859	1.87027	obs	74.1779	no		0	0	0	0	0	0	0	0	0	0	0	0	0
Sf._6278	Seifhennersdorf	Lower Oligocene	Fabaceae	Leguminosites	Leguminosites_sp	na	shrub to small tree	entire	B	B	B	AB	0.979342	703.298	2.84714	2.49237	49.3742	19.8101	688.769	na	na		na	no		0	0	0	0	0	0	0	0	0	0	0	0	0
Sf._4951	Seifhennersdorf	Lower Oligocene	Betulaceae	Carpinus	Carpinus_grandis	deciduous_(deciduous)	tree_(tree)	dentate	F	F	F	EF	0.960302	704.785	2.84806	1.5149	40.4026	26.6701	676.807	0.730024	1.87763	obs	75.4452	no		0	0	0	0	0	0	0	0	0	0	0	0	0
Sf._4059	Seifhennersdorf	Lower Oligocene	Ulmaceae	Ulmus	Ulmus_fischeri	deciduous_(deciduous)	tree_(tree)	dentate	F	F	F	EF	0.885357	727.149	2.86162	1.90072	47.7969	25.1467	643.786	0.807505	1.90592	obs	80.5228	no		0	0	0	0	0	0	0	0	0	0	0	0	0
Sf._1409:1,2	Seifhennersdorf	Lower Oligocene	Juglandaceae	Carya	Carya_fragiliformis	deciduous_(deciduous)	tree_(tree)	dentate	F	F	F	EF	0.951077	727.219	2.86167	4.00787	69.5488	17.3531	691.641	na	na		na	no		0	0	0	0	0	0	0	0	0	0	0	0	0
Sf._7210/2402	Seifhennersdorf	Lower Oligocene	Ulmaceae	Zelkova	Zelkova_zelkovifolia	deciduous_(deciduous)	tree_(tree)	dentate	F	F	F	EF	0.999259	729.776	2.86319	1.71622	43.3747	25.2733	729.235	na	na		na	no		0	0	0	0	0	0	0	0	0	0	0	0	0
Sf._1575	Seifhennersdorf	Lower Oligocene	Betulaceae	Carpinus	Carpinus_grandis	deciduous_(deciduous)	tree_(tree)	dentate	F	F	F	EF	0.83581	730.092	2.86338	1.81871	45.151	24.8258	610.218	na	na		na	no		0	0	0	0	0	0	0	0	0	0	0	0	0
Sf._6417	Seifhennersdorf	Lower Oligocene	Platanaceae	Platanus	Platanus_neptuni	deciduous_(deciduous)	tree_(tree)	dentate	E or F	E	E	EF	0.998715	730.708	2.86374	2.56039	55.473	21.6658	729.769	na	na		na	no		0	0	0	0	0	0	0	0	0	0	0	0	0
Sf._3411:1,2	Seifhennersdorf	Lower Oligocene	Betulaceae	Carpinus	Carpinus_grandis	deciduous_(deciduous)	tree_(tree)	dentate	F	F	F	EF	0.914596	738.592	2.8684	1.49164	38.9858	26.1362	675.513	na	na		na	no		0	0	0	0	0	0	0	0	0	0	0	0	0
Sf._8182	Seifhennersdorf	Lower Oligocene	Betulaceae	Carpinus	Carpinus_grandis	deciduous_(deciduous)	tree_(tree)	dentate	F	F	F	EF	0.856166	746.195	2.87285	1.644	43.5751	26.5055	638.867	na	na		na	no		0	0	0	0	0	0	0	0	0	0	0	0	0
Sf._4880:1,2	Seifhennersdorf	Lower Oligocene	Betulaceae	Carpinus	Carpinus_grandis	deciduous_(deciduous)	tree_(tree)	dentate	F	F	F	EF	0.96433	766.731	2.88464	1.76896	45.6761	25.8208	739.381	na	na		na	no		0	0	0	0	0	0	0	0	0	0	0	0	0
Sf._7971	Seifhennersdorf	Lower Oligocene	Betulaceae	Carpinus	Carpinus_grandis	deciduous_(deciduous)	tree_(tree)	dentate	F	F	F	EF	0.898638	769.839	2.8864	1.13246	34.0714	30.0861	691.807	0.740033	1.8675	obs	73.706	no		0	0	0	0	0	0	0	0	0	0	0	0	0
Sf._1645	Seifhennersdorf	Lower Oligocene	Betulaceae	Carpinus	Carpinus_grandis	deciduous_(deciduous)	tree_(tree)	dentate	F	F	F	EF	0.976375	769.902	2.88644	1.40867	39.5439	28.0718	751.713	0.773224	1.88205	obs	76.2161	no		0	0	0	0	0	0	0	0	0	0	0	0	0
Sf._7	Seifhennersdorf	Lower Oligocene	Juglandaceae	Carya	Carya_fragiliformis	deciduous_(deciduous)	tree_(tree)	dentate	E or F	F	F	EF	0.918931	770.985	2.88705	2.89637	66.7675	23.0521	708.483	0.576768	1.78455	obs	60.891	no		0	0	0	0	0	0	0	0	0	0	0	0	0
Sf._4677/5437b	Seifhennersdorf	Lower Oligocene	Sapindaceae	Acer	Acer_rueminianum	deciduous_(deciduous)	tree_(tree)	dentate	P	O,P	P	OP	0.832082	774.13	2.88881	0.728026	41.8783	57.523	644.139	0.845581	1.91082	obs	81.4367	yes	hole	5.547	0.716547	0.861149	5.547	0.716547	0	0	0	0	0	0	0	0
Sf._7830	Seifhennersdorf	Lower Oligocene	Fabaceae	Leguminosites	Leguminosites_sp	na	shrub to small tree	entire	A	B	A	AB	0.987546	776.638	2.89022	1.97109	45.6274	23.1483	766.966	na	na		na	no		0	0	0	0	0	0	0	0	0	0	0	0	0
Sf._4361	Seifhennersdorf	Lower Oligocene	Betulaceae	Betula	Betula_alboides	deciduous_(deciduous)	tree_(tree)	dentate	F	F	F	EF	0.975119	777.422	2.89066	1.44399	42.5986	29.5006	758.079	1.13537	2.00789	obs	101.834	yes	hole	10.545	1.35641	1.39102	10.545	1.35641	0	0	0	0	0	0	0	0
Sf._3509:1,2	Seifhennersdorf	Lower Oligocene	Betulaceae	Carpinus	Carpinus_roscheri	deciduous_(deciduous)	tree_(tree)	dentate	F	F	F	EF	0.946799	778.083	2.89103	1.21854	38.8453	31.8787	736.688	na	na		na	no		0	0	0	0	0	0	0	0	0	0	0	0	0
Sf._5149	Seifhennersdorf	Lower Oligocene	Betulaceae	Carpinus	Carpinus_grandis	deciduous_(deciduous)	tree_(tree)	dentate	F	F	F	EF	0.981621	782.929	2.89372	1.47321	40.6577	27.598	768.54	0.683383	1.83828	obs	68.9099	no		0	0	0	0	0	0	0	0	0	0	0	0	0
Sf._14	Seifhennersdorf	Lower Oligocene	Juglandaceae	Cyclocarya	Cyclocarya_sp	deciduous_(deciduous)	tree_(tree)	dentate	E	F	E	EF	0.954622	787.435	2.89621	3.71116	67.8119	18.2725	751.703	na	na		na	no		0	0	0	0	0	0	0	0	0	0	0	0	0
Sf._5355	Seifhennersdorf	Lower Oligocene	Juglandaceae	Engelhardia	Engelhardia_orsbergensis	evergreen_(evergreen)	tree_(tree)	dentate	E or F	E	E	EF	0.81604	787.723	2.89637	4.90048	80.8233	16.4929	642.813	na	na		na	no		0	0	0	0	0	0	0	0	0	0	0	0	0
Sf._4118	Seifhennersdorf	Lower Oligocene	Sapindaceae	Acer	Acer_cfdasycarpoides	deciduous_(deciduous)	tree_(tree)	dentate	P	P	P	OP	0.803348	790.303	2.89779	1.20226	41.7065	34.6902	634.888	0.958686	1.94904	obs	88.929	no		0	0	0	0	0	0	0	0	0	0	0	0	0
Sf._8273	Seifhennersdorf	Lower Oligocene	Lauraceae	Daphnogene	Daphnogene_cinnamomifolia	evergreen_(evergreen)	shrub to small tree	entire	C or D	C,D	C,D	CD	0.911531	793.361	2.89947	4.25576	71.051	16.6952	723.173	1.4593	2.08781	obs	122.408	no		0	0	0	0	0	0	0	0	0	0	0	0	0
Sf._8498	Seifhennersdorf	Lower Oligocene	Betulaceae	Carpinus	Carpinus_grandis	deciduous_(deciduous)	tree_(tree)	dentate	F	F	F	EF	0.877707	805.473	2.90605	1.66706	43.8492	26.3033	706.97	0.758062	1.86798	obs	73.7875	no		0	0	0	0	0	0	0	0	0	0	0	0	0
Sf._2340	Seifhennersdorf	Lower Oligocene	Cannabaceae	Celtis	Celtis_pirskenbergensis	deciduous_(deciduous)	tree_(tree)	dentate	E	E,F,H	E	EF	0.908999	805.676	2.90616	2.71975	56.898	20.9203	732.358	na	na		na	yes	hole	5.525	0.68576	0.754412	5.525	0.68576	0	0	0	0	0	0	0	0
Sf._1451	Seifhennersdorf	Lower Oligocene	Juglandaceae	Carya	Carya_fragiliformis	deciduous_(deciduous)	tree_(tree)	dentate	F	F	F	EF	0.95638	808.499	2.90768	2.38028	55.7138	23.4064	773.232	na	na		na	no		0	0	0	0	0	0	0	0	0	0	0	0	0
Sf._3739	Seifhennersdorf	Lower Oligocene	Ulmaceae	Ulmus	Ulmus_fischeri	deciduous_(deciduous)	tree_(tree)	dentate	F	F	F	EF	0.9512	811.939	2.90952	1.93429	51.0271	26.3803	772.316	0.861004	1.90891	obs	81.0785	no		0	0	0	0	0	0	0	0	0	0	0	0	0
Sf._5414	Seifhennersdorf	Lower Oligocene	Juglandaceae	Carya	Carya_fragiliformis	deciduous_(deciduous)	tree_(tree)	dentate	F	F	F	EF	0.861921	814.748	2.91102	3.17957	65.456	20.5865	702.249	na	na		na	no		0	0	0	0	0	0	0	0	0	0	0	0	0
Sf._5397	Seifhennersdorf	Lower Oligocene	Betulaceae	Carpinus	Carpinus_grandis	deciduous_(deciduous)	tree_(tree)	dentate	F	F	F	EF	0.981339	821.672	2.9147	1.86124	48.3901	25.9988	806.338	0.834876	1.8967	obs	78.8323	no		0	0	0	0	0	0	0	0	0	0	0	0	0
Sf._49/48	Seifhennersdorf	Lower Oligocene	Sapindaceae	Acer	Acer_cftricuspidatum	deciduous_(deciduous)	tree_(tree)	dentate	P	P	P	OP	0.817967	824.042	2.91595	0.949452	42.8603	45.1421	674.039	na	na		na	no		0	0	0	0	0	0	0	0	0	0	0	0	0
Sf._8474	Seifhennersdorf	Lower Oligocene	Betulaceae	Carpinus	Carpinus_roscheri	deciduous_(deciduous)	tree_(tree)	dentate	F	F	F	EF	0.981696	830.464	2.91932	1.37651	42.0585	30.5545	815.263	0.807227	1.88376	obs	76.5181	no		0	0	0	0	0	0	0	0	0	0	0	0	0
Sf._4736:1,2	Seifhennersdorf	Lower Oligocene	Betulaceae	Betula	Betula_alboides	deciduous_(deciduous)	tree_(tree)	dentate	F	F	F	EF	1	831.792	2.92001	1.43532	43.596	30.3737	831.792	0.742921	1.85595	obs	71.7719	no		0	0	0	0	0	0	0	0	0	0	0	0	0
Sf._5079	Seifhennersdorf	Lower Oligocene	Betulaceae	Carpinus	Carpinus_roscheri	deciduous_(deciduous)	tree_(tree)	dentate	F	F	F	EF	0.964929	834.34	2.92134	1.54987	44.0972	28.4521	805.079	0.440542	1.68205	obs	48.0898	no		0	0	0	0	0	0	0	0	0	0	0	0	0
Sf._3740	Seifhennersdorf	Lower Oligocene	Ulmaceae	Ulmus	Ulmus_fischeri	deciduous_(deciduous)	tree_(tree)	dentate	F	F	F	EF	0.974002	835.066	2.92172	1.76147	50.3531	28.5858	813.357	na	na		na	no		0	0	0	0	0	0	0	0	0	0	0	0	0
Sf._1134	Seifhennersdorf	Lower Oligocene	Juglandaceae	Carya	Carya_fragiliformis	deciduous_(deciduous)	tree_(tree)	dentate	F	F	F	EF	0.880296	837.427	2.92295	4.01747	72.9917	18.1686	737.184	na	na		na	no		0	0	0	0	0	0	0	0	0	0	0	0	0
Sf._4718a	Seifhennersdorf	Lower Oligocene	Betulaceae	Betula	Betula_alboides	deciduous_(deciduous)	tree_(tree)	dentate	F	F	F	EF	0.916174	838.405	2.92345	1.63535	46.8202	28.6302	768.125	0.678644	1.82462	obs	66.7752	no		0	0	0	0	0	0	0	0	0	0	0	0	0
Sf._2453	Seifhennersdorf	Lower Oligocene	Lauraceae	Laurophyllum	Laurophyllum_acutimontanum	evergreen_(evergreen)	shrub to small tree	entire	A or B	A	A	AB	0.9411	838.657	2.92358	3.30875	86.0841	26.0171	789.26	na	na		na	no		0	0	0	0	0	0	0	0	0	0	0	0	0
Sf._1455	Seifhennersdorf	Lower Oligocene	Betulaceae	Carpinus	Carpinus_grandis	deciduous_(deciduous)	tree_(tree)	dentate	F	F	F	EF	0.859347	848.372	2.92859	1.58661	45.0376	28.386	729.046	na	na		na	no		0	0	0	0	0	0	0	0	0	0	0	0	0
Sf._61	Seifhennersdorf	Lower Oligocene	Sapindaceae	Acer	Acer_angustilobum	deciduous_(deciduous)	tree_(tree)	dentate	P	P	P	OP	0.866507	850.429	2.92964	0.861177	51.668	59.997	736.903	1.1258	1.99019	obs	97.7676	no		0	0	0	0	0	0	0	0	0	0	0	0	0
Sf._2530	Seifhennersdorf	Lower Oligocene	Platanaceae	Platanus	Platanus_neptuni	deciduous_(deciduous)	tree_(tree)	dentate	E or F	E	E	EF	0.8781	858.285	2.93363	3.48468	68.2057	19.573	753.66	1.36498	2.05259	obs	112.873	no		0	0	0	0	0	0	0	0	0	0	0	0	0
Sf._6392	Seifhennersdorf	Lower Oligocene	Platanaceae	Platanus	Platanus_neptuni	deciduous_(deciduous)	tree_(tree)	dentate	E or F	E	E	EF	0.937513	863.582	2.9363	4.06606	76.7147	18.8671	809.619	1.38802	2.05712	obs	114.057	no		0	0	0	0	0	0	0	0	0	0	0	0	0
Sf._5309	Seifhennersdorf	Lower Oligocene	Betulaceae	Carpinus	Carpinus_grandis	deciduous_(deciduous)	tree_(tree)	dentate	F	F	F	EF	0.958276	869.298	2.93917	1.61158	45.5941	28.2915	833.027	na	na		na	no		0	0	0	0	0	0	0	0	0	0	0	0	0
Sf._2016	Seifhennersdorf	Lower Oligocene	Betulaceae	Carpinus	Carpinus_grandis	deciduous_(deciduous)	tree_(tree)	dentate	F	F	F	EF	0.895813	870.305	2.93967	1.71064	49.3706	28.8609	779.63	0.842532	1.89019	obs	77.6593	yes	margin	38.733	4.45051	4.96812	0	0	38.733	4.45051	0	0	0	0	0	0
Sf._41	Seifhennersdorf	Lower Oligocene	Sapindaceae	Acer	Acer_cftricuspidatum	deciduous_(deciduous)	tree_(tree)	dentate	P	P	P	OP	0.788703	879.759	2.94436	1.13596	48.6644	42.84	693.868	na	na		na	no		0	0	0	0	0	0	0	0	0	0	0	0	0
Sf._1105	Seifhennersdorf	Lower Oligocene	Juglandaceae	Carya	Carya_fragiliformis	deciduous_(deciduous)	tree_(tree)	dentate	F	F	F	EF	0.946362	880.081	2.94452	2.84969	64.0707	22.4834	832.876	na	na		na	no		0	0	0	0	0	0	0	0	0	0	0	0	0
Sf._5460	Seifhennersdorf	Lower Oligocene	Juglandaceae	Carya	Carya_fragiliformis	deciduous_(deciduous)	tree_(tree)	dentate	F	F	F	EF	0.990983	882.656	2.94579	3.63719	71.7581	19.729	874.697	na	na		na	no		0	0	0	0	0	0	0	0	0	0	0	0	0
Sf._6156a	Seifhennersdorf	Lower Oligocene	Lauraceae	Laurophyllum	Laurophyllum_sp	evergreen_(evergreen)	tree_(tree)	entire	A or B	A,B	A,B	AB	0.882984	886.575	2.94772	7	95.2558	13.608	782.831	1.28432	2.027	obs	106.414	no		0	0	0	0	0	0	0	0	0	0	0	0	0
Sf._6609	Seifhennersdorf	Lower Oligocene	Lauraceae	Laurophyllum	Laurophyllum_sp	evergreen_(evergreen)	tree_(tree)	entire	A or B	A,B	A,B	AB	0.892332	887.279	2.94806	6.88959	92.1914	13.3813	791.747	0.783892	1.86305	obs	72.9546	no		0	0	0	0	0	0	0	0	0	0	0	0	0
Sf._8463:1,2	Seifhennersdorf	Lower Oligocene	Betulaceae	Carpinus	Carpinus_grandis	deciduous_(deciduous)	tree_(tree)	dentate	F	F	F	EF	0.982324	900.864	2.95466	1.55516	47.2	30.3505	884.94	na	na		na	no		0	0	0	0	0	0	0	0	0	0	0	0	0
Sf._1832	Seifhennersdorf	Lower Oligocene	Betulaceae	Betula	Betula_alboides	deciduous_(deciduous)	tree_(tree)	dentate	F	F	F	EF	0.820379	901.068	2.95476	1.32345	42.5226	32.13	739.217	0.694939	1.82053	obs	66.15	no		0	0	0	0	0	0	0	0	0	0	0	0	0
Sf._3319	Seifhennersdorf	Lower Oligocene	Juglandaceae	Carya	Carya_fragiliformis	deciduous_(deciduous)	tree_(tree)	dentate	F	F	F	EF	0.923985	905.073	2.95668	4.03337	72.7686	18.0416	836.274	na	na		na	no		0	0	0	0	0	0	0	0	0	0	0	0	0
Sf._6136	Seifhennersdorf	Lower Oligocene	Lauraceae	Laurophyllum	Laurophyllum_sp	evergreen_(evergreen)	tree_(tree)	entire	A or B	A,B	A,B	AB	0.914932	909.693	2.9589	3.91262	74.4858	19.0373	832.308	na	na		na	no		0	0	0	0	0	0	0	0	0	0	0	0	0
Sf._5805	Seifhennersdorf	Lower Oligocene	Juglandaceae	Carya	Carya_fragiliformis	deciduous_(deciduous)	tree_(tree)	dentate	F	F	F	EF	0.973994	916.087	2.96194	4.27302	82.8494	19.389	892.263	na	na		na	no		0	0	0	0	0	0	0	0	0	0	0	0	0
Sf._3299	Seifhennersdorf	Lower Oligocene	Betulaceae	Alnus	Alnus_phocaeensis	deciduous_(deciduous)	tree_(tree)	dentate	F	F	F	EF	0.918534	919.161	2.96339	1.45106	42.8252	29.5131	844.281	na	na		na	no		0	0	0	0	0	0	0	0	0	0	0	0	0
Sf._8500	Seifhennersdorf	Lower Oligocene	Betulaceae	Carpinus	Carpinus_grandis	deciduous_(deciduous)	tree_(tree)	dentate	F	F	F	EF	0.955745	922.413	2.96493	1.80012	51.6805	28.7095	881.592	0.856446	1.88598	obs	76.9098	no		0	0	0	0	0	0	0	0	0	0	0	0	0
Sf._8340:1,2	Seifhennersdorf	Lower Oligocene	Lauraceae	Daphnogene	Daphnogene_cinnamomifolia	evergreen_(evergreen)	shrub to small tree	entire	C or D	C,D	C,D	CD	0.922343	936.983	2.97173	3.74067	70.8357	18.9366	864.22	1.06415	1.95543	obs	90.2464	no		0	0	0	0	0	0	0	0	0	0	0	0	0
Sf._7475	Seifhennersdorf	Lower Oligocene	Dicotyledonae fam. inc. sedis	Dicotylophyllum	Dicotylophyllum_sp1	na	na	na	na	A,B	na	na	0.90536	940.195	2.97322	1.7181	51.3646	29.8962	851.215	na	na		na	no		0	0	0	0	0	0	0	0	0	0	0	0	0
Sf._5615	Seifhennersdorf	Lower Oligocene	Juglandaceae	Carya	Carya_fragiliformis	deciduous_(deciduous)	tree_(tree)	dentate	F	F	F	EF	0.951072	953.098	2.97914	3.66126	87.6856	23.9496	906.465	na	na		na	yes	margin	35.417	3.71599	3.90715	0	0	35.417	3.71599	0	0	0	0	0	0
Sf._3321	Seifhennersdorf	Lower Oligocene	Juglandaceae	Carya	Carya_fragiliformis	deciduous_(deciduous)	tree_(tree)	dentate	F	F	F	EF	0.815732	954.862	2.97994	3.57361	72.1858	20.1997	778.912	na	na		na	no		0	0	0	0	0	0	0	0	0	0	0	0	0
Sf._6209	Seifhennersdorf	Lower Oligocene	Lauraceae	Laurophyllum	Laurophyllum_acutimontanum	evergreen_(evergreen)	shrub to small tree	entire	A	A	A	AB	0.873489	959.392	2.982	4.29878	80.4442	18.7133	838.018	na	na		na	no		0	0	0	0	0	0	0	0	0	0	0	0	0
Sf._4495	Seifhennersdorf	Lower Oligocene	Sapindaceae	Acer	Acer_angustilobum	deciduous_(deciduous)	tree_(tree)	dentate	P	P	P	OP	0.770491	960.692	2.98258	0.739382	49.2206	66.5699	740.204	na	na		na	no		0	0	0	0	0	0	0	0	0	0	0	0	0
Sf._6419	Seifhennersdorf	Lower Oligocene	Platanaceae	Platanus	Platanus_neptuni	deciduous_(deciduous)	tree_(tree)	dentate	E	E	E	EF	0.916608	967.486	2.98564	2.63078	63.4963	24.1359	886.805	na	na		na	no		0	0	0	0	0	0	0	0	0	0	0	0	0
Sf._8630	Seifhennersdorf	Lower Oligocene	Betulaceae	Carpinus	Carpinus_grandis	deciduous_(deciduous)	tree_(tree)	dentate	F	F	F	EF	0.91123	968.739	2.98621	1.46395	47.3674	32.3558	882.745	0.697255	1.80962	obs	64.509	no		0	0	0	0	0	0	0	0	0	0	0	0	0
Sf._2318	Seifhennersdorf	Lower Oligocene	Juglandaceae	Carya	Carya_fragiliformis	deciduous_(deciduous)	tree_(tree)	dentate	F	F	F	EF	0.950225	975.266	2.98912	2.40514	61.1569	25.4276	926.722	na	na		na	no		0	0	0	0	0	0	0	0	0	0	0	0	0
Sf._5384:1,2	Seifhennersdorf	Lower Oligocene	Juglandaceae	Carya	Carya_fragiliformis	deciduous_(deciduous)	tree_(tree)	dentate	E or F	F	F	EF	0.992104	1002.37	3.00103	2.14025	57.3865	26.813	994.454	0.717442	1.81343	obs	65.0772	no		0	0	0	0	0	0	0	0	0	0	0	0	0
Sf._5238	Seifhennersdorf	Lower Oligocene	Betulaceae	Betula	Betula_alboides	deciduous_(deciduous)	tree_(tree)	dentate	F	F	F	EF	0.969289	1004.34	3.00188	1.72175	53.0226	30.7957	973.491	0.769617	1.8364	obs	68.6114	no		0	0	0	0	0	0	0	0	0	0	0	0	0
Sf._75	Seifhennersdorf	Lower Oligocene	Sapindaceae	Acer	Acer_engelhardtii	deciduous_(deciduous)	tree_(tree)	dentate	P	P	P	OP	0.850976	1006.51	3.00282	1.37329	59.6924	43.4667	856.513	na	na		na	no		0	0	0	0	0	0	0	0	0	0	0	0	0
Sf._1505	Seifhennersdorf	Lower Oligocene	Juglandaceae	Carya	Carya_fragiliformis	deciduous_(deciduous)	tree_(tree)	dentate	F	F	F	EF	0.965923	1009.43	3.00407	3.01217	77.4944	25.7271	975.027	na	na		na	no		0	0	0	0	0	0	0	0	0	0	0	0	0
Sf._2533	Seifhennersdorf	Lower Oligocene	Salicaceae	Salix	Salix_varians	deciduous_(deciduous)	shrub to small tree	dentate	E or F	F	F	EF	0.95403	1010.49	3.00453	3.07574	71.3811	23.2078	964.039	na	na		na	no		0	0	0	0	0	0	0	0	0	0	0	0	0
Sf._7202:1,2	Seifhennersdorf	Lower Oligocene	Ulmaceae	Ulmus	Ulmus_fischeri	deciduous_(deciduous)	tree_(tree)	dentate	F	F	F	EF	0.950192	1014.31	3.00617	1.41069	45.6725	32.3761	963.793	0.970244	1.91162	obs	81.5866	no		0	0	0	0	0	0	0	0	0	0	0	0	0
Sf._1001	Seifhennersdorf	Lower Oligocene	Juglandaceae	Carya	Carya_fragiliformis	deciduous_(deciduous)	tree_(tree)	dentate	F	F	F	EF	0.966339	1024.86	3.01067	2.69092	72.3533	26.8879	990.366	na	na		na	no		0	0	0	0	0	0	0	0	0	0	0	0	0
Sf._15 (II)	Seifhennersdorf	Lower Oligocene	Juglandaceae	Carya	Carya_fragiliformis	deciduous_(deciduous)	tree_(tree)	dentate	F	F	F	EF	0.942195	1027.35	3.01172	4.04918	85.2035	21.0422	967.965	0.719141	1.81013	obs	64.5847	no		0	0	0	0	0	0	0	0	0	0	0	0	0
Sf._8138:1,2	Seifhennersdorf	Lower Oligocene	Sapindaceae	Acer	Acer_angustilobum	deciduous_(deciduous)	tree_(tree)	dentate	P	P	P	OP	0.927791	1028.61	3.01225	1.16632	53.0764	45.5077	954.331	na	na		na	no		0	0	0	0	0	0	0	0	0	0	0	0	0
Sf._5123	Seifhennersdorf	Lower Oligocene	Betulaceae	Carpinus	Carpinus_grandis	deciduous_(deciduous)	tree_(tree)	dentate	F	F	F	EF	0.989801	1057.3	3.0242	1.5791	51.7514	32.7727	1046.51	1.07688	1.93933	obs	86.9629	yes	hole	3.951	0.373689	0.37754	3.951	0.373689	0	0	0	0	0	0	0	0
Sf._6292	Seifhennersdorf	Lower Oligocene	Ebenaceae	Diospyros	Diospyros_sp	deciduous_(deciduous)	tree_(tree)	entire	B	B	B	AB	0.761304	1057.58	3.02431	2.09905	57.4939	27.3904	805.143	na	na		na	no		0	0	0	0	0	0	0	0	0	0	0	0	0
Sf._1834	Seifhennersdorf	Lower Oligocene	Betulaceae	Carpinus	Carpinus_grandis	deciduous_(deciduous)	tree_(tree)	dentate	F	F	F	EF	0.996193	1074.48	3.0312	1.31771	44.9498	34.1121	1070.39	na	na		na	no		0	0	0	0	0	0	0	0	0	0	0	0	0
Sf._2176	Seifhennersdorf	Lower Oligocene	Betulaceae	Carpinus	Carpinus_grandis	deciduous_(deciduous)	tree_(tree)	dentate	F	F	F	EF	0.98282	1074.88	3.03136	1.52642	48.8244	31.9863	1056.41	0.877127	1.86852	obs	73.879	no		0	0	0	0	0	0	0	0	0	0	0	0	0
Sf._5073	Seifhennersdorf	Lower Oligocene	Betulaceae	Carpinus	Carpinus_grandis	deciduous_(deciduous)	tree_(tree)	dentate	F	F	F	EF	0.917604	1080.01	3.03343	1.31911	46.6374	35.3553	991.025	1.26184	1.9884	obs	97.3637	no		0	0	0	0	0	0	0	0	0	0	0	0	0
Sf._3329	Seifhennersdorf	Lower Oligocene	Sapindaceae	Acer	Acer_angustilobum	deciduous_(deciduous)	tree_(tree)	dentate	P	P	P	OP	0.802711	1082.19	3.0343	1.00708	51.1615	50.8016	868.683	0.728558	1.80582	obs	63.9469	no		0	0	0	0	0	0	0	0	0	0	0	0	0
Sf._5251	Seifhennersdorf	Lower Oligocene	Betulaceae	Carpinus	Carpinus_grandis	deciduous_(deciduous)	tree_(tree)	dentate	F	F	F	EF	0.919451	1085.07	3.03546	1.4873	48.0498	32.3067	997.671	na	na		na	no		0	0	0	0	0	0	0	0	0	0	0	0	0
Sf._7476	Seifhennersdorf	Lower Oligocene	Anacardiaceae	Toxicodendron	Toxicodendron_herthae	deciduous_(deciduous)	shrub, climber, scrambler	dentate	F	F	F	EF	0.808472	1086.19	3.03591	2.11394	59.5152	28.1536	878.153	1.16308	1.96041	obs	91.2871	no		0	0	0	0	0	0	0	0	0	0	0	0	0
Sf._8672b	Seifhennersdorf	Lower Oligocene	Juglandaceae	Carya	Carya_fragiliformis	deciduous_(deciduous)	tree_(tree)	dentate	F	F	F	EF	0.899542	1092.33	3.03835	2.65367	66.0789	24.901	982.596	na	na		na	no		0	0	0	0	0	0	0	0	0	0	0	0	0
Sf._5248	Seifhennersdorf	Lower Oligocene	Betulaceae	Carpinus	Carpinus_grandis	deciduous_(deciduous)	tree_(tree)	dentate	F	F	F	EF	0.954033	1099.44	3.04117	1.44836	49.408	34.1131	1048.9	1.0295	1.91792	obs	82.7787	no		0	0	0	0	0	0	0	0	0	0	0	0	0
Sf._8376	Seifhennersdorf	Lower Oligocene	Platanaceae	Platanus	Platanus_neptuni	deciduous_(deciduous)	tree_(tree)	dentate	E or F	E	E	EF	0.956406	1099.67	3.04126	4.56522	93.5457	20.491	1051.73	0.956691	1.89355	obs	78.2614	no		0	0	0	0	0	0	0	0	0	0	0	0	0
Sf._2520:1,2a	Seifhennersdorf	Lower Oligocene	Lauraceae	Laurophyllum	Laurophyllum_sp	evergreen_(evergreen)	tree_(tree)	entire	A or B	A,B	A,B	AB	0.717005	1100.77	3.0417	4.08824	104.905	25.6603	789.256	1.34144	2.00554	obs	101.283	no		0	0	0	0	0	0	0	0	0	0	0	0	0
Sf._9a,b	Seifhennersdorf	Lower Oligocene	Platanaceae	Platanus	Platanus_neptuni	deciduous_(deciduous)	tree_(tree)	dentate	E or F	E	E	EF	0.903026	1109.7	3.04521	3.50182	78.1847	22.3269	1002.09	na	na		na	no		0	0	0	0	0	0	0	0	0	0	0	0	0
Sf._8539	Seifhennersdorf	Lower Oligocene	Betulaceae	Carpinus	Carpinus_grandis	deciduous_(deciduous)	tree_(tree)	dentate	F	F	F	EF	0.970711	1130.76	3.05337	1.64842	51.4488	31.211	1097.64	na	na		na	no		0	0	0	0	0	0	0	0	0	0	0	0	0
Sf._4492/4496	Seifhennersdorf	Lower Oligocene	Sapindaceae	Acer	Acer_angustilobum	deciduous_(deciduous)	tree_(tree)	dentate	P	P	P	OP	0.742319	1135.87	3.05533	1.03636	53.2091	51.3421	843.181	1.20937	1.96594	obs	92.4569	no		0	0	0	0	0	0	0	0	0	0	0	0	0
Sf._5195	Seifhennersdorf	Lower Oligocene	Betulaceae	Carpinus	Carpinus_grandis	deciduous_(deciduous)	tree_(tree)	dentate	F	F	F	EF	0.958953	1138.08	3.05617	1.2995	46.2207	35.568	1091.36	0.91532	1.87318	obs	74.6766	no		0	0	0	0	0	0	0	0	0	0	0	0	0
Sf._3697:1,2	Seifhennersdorf	Lower Oligocene	Betulaceae	Carpinus	Carpinus_grandis	deciduous_(deciduous)	tree_(tree)	dentate	F	F	F	EF	0.977285	1143.99	3.05842	2.35563	70.1455	29.7778	1118	1.24115	1.97336	obs	94.0513	no		0	0	0	0	0	0	0	0	0	0	0	0	0
Sf._4497	Seifhennersdorf	Lower Oligocene	Sapindaceae	Acer	Acer_angustilobum	deciduous_(deciduous)	tree_(tree)	dentate	P	P	P	OP	0.838023	1161.49	3.06502	0.911437	58.9561	64.6847	973.355	1.01212	1.90316	obs	80.0134	no		0	0	0	0	0	0	0	0	0	0	0	0	0
Sf._1136	Seifhennersdorf	Lower Oligocene	Juglandaceae	Carya	Carya_fragiliformis	deciduous_(deciduous)	tree_(tree)	dentate	F	F	F	EF	0.875119	1162.94	3.06556	2.40028	63.5795	26.4883	1017.71	na	na		na	no		0	0	0	0	0	0	0	0	0	0	0	0	0
Sf._6150a	Seifhennersdorf	Lower Oligocene	Platanaceae	Platanus	Platanus_neptuni	deciduous_(deciduous)	tree_(tree)	dentate	E	E	E	EF	0.929121	1163.58	3.06579	4.40807	88.1755	20.0032	1081.1	1.37625	2.00483	obs	101.118	no		0	0	0	0	0	0	0	0	0	0	0	0	0
Sf._4671/4675	Seifhennersdorf	Lower Oligocene	Sapindaceae	Acer	Acer_engelhardtii	deciduous_(deciduous)	tree_(tree)	dentate	P	P	P	OP	0.889364	1172.3	3.06904	1.2899	62.2576	48.2655	1042.61	1.27062	1.9771	obs	94.8627	no		0	0	0	0	0	0	0	0	0	0	0	0	0
Sf._4080a	Seifhennersdorf	Lower Oligocene	Cercidiphyllaceae	Cercidiphyllum	Cercidiphyllum_crenatum	deciduous_(deciduous)	shrub to small tree	dentate	G or H	G	G	GH	0.928213	1180.36	3.07202	0.899407	37.399	41.5818	1095.63	0.71821	1.78667	obs	61.188	no		0	0	0	0	0	0	0	0	0	0	0	0	0
Sf._4442a	Seifhennersdorf	Lower Oligocene	Dicotyledonae fam. inc. sedis	Dicotylophyllum	Dicotylophyllum_dentate	na	na	dentate	E or F	na	E,F	EF	0.915989	1180.71	3.07214	2.70794	71.9374	26.5654	1081.52	na	na		na	no		0	0	0	0	0	0	0	0	0	0	0	0	0
Sf._4129	Seifhennersdorf	Lower Oligocene	Sapindaceae	Acer	Acer_cftricuspidatum	deciduous_(deciduous)	tree_(tree)	dentate	P	P	P	OP	0.808831	1181.62	3.07248	1.53553	58.3031	37.9695	955.731	na	na		na	yes	hole/margin	85.293	7.21831	8.92437	48.556	4.10927	36.737	3.10904	0	0	0	0	0	0
Sf._8411a	Seifhennersdorf	Lower Oligocene	Cercidiphyllaceae	Cercidiphyllum	Cercidiphyllum_crenatum	deciduous_(deciduous)	shrub to small tree	dentate	G	G	G	GH	0.898877	1184.95	3.0737	1.25321	46.0014	36.7068	1065.12	na	na		na	no		0	0	0	0	0	0	0	0	0	0	0	0	0
Sf._7824	Seifhennersdorf	Lower Oligocene	Juglandaceae	Carya	Carya_fragiliformis	deciduous_(deciduous)	tree_(tree)	dentate	E or F	F	F	EF	0.885811	1187.3	3.07456	3.72272	79.6211	21.3879	1051.72	1.18488	1.95181	obs	89.4964	no		0	0	0	0	0	0	0	0	0	0	0	0	0
Sf._8597	Seifhennersdorf	Lower Oligocene	Sapindaceae	Acer	Acer_rueminianum	deciduous_(deciduous)	tree_(tree)	dentate	P	O,P	P	OP	0.776693	1200.85	3.07949	0.757303	57.0818	75.3752	932.69	1.75904	2.08103	obs	120.511	no		0	0	0	0	0	0	0	0	0	0	0	0	0
Sf._1152:1,2	Seifhennersdorf	Lower Oligocene	Juglandaceae	Carya	Carya_fragiliformis	deciduous_(deciduous)	tree_(tree)	dentate	F	F	F	EF	0.921214	1202.5	3.08009	3.00626	73.85	24.5654	1107.76	1.3284	1.98763	obs	97.1919	yes	hole	2.973	0.247234	0.268379	2.973	0.247234	0	0	0	0	0	0	0	0
Sf._8308	Seifhennersdorf	Lower Oligocene	Lauraceae	Daphnogene	Daphnogene_cinnamomifolia	evergreen_(evergreen)	shrub to small tree	entire	C or D	C,D	C,D	CD	0.921577	1203.05	3.08028	2.7547	69.0747	25.0752	1108.71	na	na		na	no		0	0	0	0	0	0	0	0	0	0	0	0	0
Sf._4589/4578	Seifhennersdorf	Lower Oligocene	Sapindaceae	Acer	Acer_angustilobum	deciduous_(deciduous)	tree_(tree)	dentate	P	P	P	OP	0.907894	1225.31	3.08824	1.22376	54.849	44.8202	1112.45	na	na		na	no		0	0	0	0	0	0	0	0	0	0	0	0	0
Sf._7840	Seifhennersdorf	Lower Oligocene	Juglandaceae	Carya	Carya_fragiliformis	deciduous_(deciduous)	tree_(tree)	dentate	E or F	F	F	EF	0.882862	1227.74	3.08911	2.15944	64.2272	29.7425	1083.93	na	na		na	no		0	0	0	0	0	0	0	0	0	0	0	0	0
Sf._5106	Seifhennersdorf	Lower Oligocene	Betulaceae	Ostrya	Ostrya_atlantidis	deciduous_(deciduous)	tree_(tree)	dentate	F	F	F	EF	0.917081	1228.71	3.08945	2.01425	59.1373	29.3595	1126.83	na	na		na	no		0	0	0	0	0	0	0	0	0	0	0	0	0
Sf._4889	Seifhennersdorf	Lower Oligocene	Betulaceae	Carpinus	Carpinus_roscheri	deciduous_(deciduous)	tree_(tree)	dentate	F	F	F	EF	0.966596	1231.95	3.09059	1.49476	53.0465	35.4883	1190.8	0.904434	1.85607	obs	71.7903	no		0	0	0	0	0	0	0	0	0	0	0	0	0
Sf._4b	Seifhennersdorf	Lower Oligocene	Betulaceae	Carpinus	Carpinus_roscheri	deciduous_(deciduous)	tree_(tree)	dentate	F	F	F	EF	0.833641	1234	3.09131	1.36025	48.3393	35.537	1028.71	na	na		na	no		0	0	0	0	0	0	0	0	0	0	0	0	0
Sf._3735	Seifhennersdorf	Lower Oligocene	Sapindaceae	Acer	Acer_cftricuspidatum	deciduous_(deciduous)	tree_(tree)	dentate	P	P	P	OP	0.8551	1256.58	3.09919	0.955106	52.495	54.9625	1074.5	na	na		na	no		0	0	0	0	0	0	0	0	0	0	0	0	0
Sf._3991	Seifhennersdorf	Lower Oligocene	Betulaceae	Carpinus	Carpinus_grandis	deciduous_(deciduous)	tree_(tree)	dentate	F	F	F	EF	0.98965	1259.6	3.10023	1.70378	58.3276	34.2343	1246.57	0.916099	1.85663	obs	71.8844	no		0	0	0	0	0	0	0	0	0	0	0	0	0
Sf._2651	Seifhennersdorf	Lower Oligocene	Lauraceae	Laurophyllum	Laurophyllum_sp	evergreen_(evergreen)	tree_(tree)	entire	A or B	A,B	A,B	AB	0.874572	1263.94	3.10173	4.42024	92.9483	21.0279	1105.4	na	na		na	no		0	0	0	0	0	0	0	0	0	0	0	0	0
Sf._8203	Seifhennersdorf	Lower Oligocene	Sapindaceae	Acer	Acer_angustilobum	deciduous_(deciduous)	tree_(tree)	dentate	P	P	P	OP	0.720043	1277.57	3.10639	0.717252	55.9304	77.9788	919.907	0.754336	1.78982	obs	61.634	no		0	0	0	0	0	0	0	0	0	0	0	0	0
Sf._2274	Seifhennersdorf	Lower Oligocene	Fagaceae	Castaneophyllum	Castaneophyllum_lonchitiforme	evergreen_(evergreen)	tree_(tree)	dentate	F	F	F	EF	0.706768	1279.49	3.10704	111.791	18.7589	5.9594	904.304	na	na		na	yes	hole	6.921	0.540918	0.76534	6.921	0.540918	0	0	0	0	0	0	0	0
Sf._1065	Seifhennersdorf	Lower Oligocene	Salicaceae	Salix	Salix_varians	deciduous_(deciduous)	shrub to small tree	dentate	E or F	F	F	EF	0.866119	1305.39	3.11574	3.45785	81.1546	23.4697	1130.62	0.341917	1.5237	obs	33.3967	no		0	0	0	0	0	0	0	0	0	0	0	0	0
Sf._6056	Seifhennersdorf	Lower Oligocene	Fabaceae	Leguminosites	Leguminosites_sp	semi-deciduous	shrub to small tree	entire	A or B	B	B	AB	0.970704	1313.12	3.1183	2.59804	66.2344	25.494	1274.65	1.64877	2.04472	obs	110.846	no		0	0	0	0	0	0	0	0	0	0	0	0	0
Sf._8607/6578 a	Seifhennersdorf	Lower Oligocene	Juglandaceae	Carya	Carya_fragiliformis	deciduous_(deciduous)	tree_(tree)	dentate	F	F	F	EF	0.804831	1315.76	3.11918	3.78638	85.6381	22.6174	1058.96	na	na		na	yes	hole	2.321	0.176401	0.219177	2.321	0.176401	0	0	0	0	0	0	0	0
Sf._7819a	Seifhennersdorf	Lower Oligocene	Dicotyledonae fam. inc. sedis	Dicotylophyllum	Dicotylophyllum_entire	semi-deciduous	na	entire	A or B	na	A,B	AB	0.74438	1318.25	3.12	2.53015	68.9569	27.2541	981.277	1.54923	2.02341	obs	105.538	no		0	0	0	0	0	0	0	0	0	0	0	0	0
Sf._4410	Seifhennersdorf	Lower Oligocene	Juglandaceae	Carya	Carya_fragiliformis	deciduous_(deciduous)	tree_(tree)	dentate	F	F	F	EF	0.855301	1319.21	3.12031	4.03796	95.6852	23.6964	1128.32	na	na		na	no		0	0	0	0	0	0	0	0	0	0	0	0	0
Sf._6153	Seifhennersdorf	Lower Oligocene	Lauraceae	Laurophyllum	Laurophyllum_sp	evergreen_(evergreen)	tree_(tree)	entire	A or B	A,B	A,B	AB	0.898603	1325.1	3.12225	4.96219	99.6062	20.0731	1190.74	0.964099	1.86517	obs	73.3112	no		0	0	0	0	0	0	0	0	0	0	0	0	0
Sf._7843	Seifhennersdorf	Lower Oligocene	Betulaceae	Carpinus	Carpinus_grandis	deciduous_(deciduous)	tree_(tree)	dentate	F	F	F	EF	0.973285	1360.74	3.13378	1.41967	53.0438	37.3636	1324.39	na	na		na	no		0	0	0	0	0	0	0	0	0	0	0	0	0
Sf._4258	Seifhennersdorf	Lower Oligocene	Betulaceae	Carpinus	Carpinus_grandis	deciduous_(deciduous)	tree_(tree)	dentate	F	F	F	EF	0.982789	1375.74	3.13854	1.53589	54.0965	35.2216	1352.07	0.788657	1.7923	obs	61.9871	yes	margin	10.416	0.757118	0.770377	0	0	10.416	0.757118	0	0	0	0	0	0
Sf._3745	Seifhennersdorf	Lower Oligocene	Betulaceae	Carpinus	Carpinus_roscheri	deciduous_(deciduous)	tree_(tree)	dentate	F	F	F	EF	0.990895	1415.03	3.15076	1.71464	61.7378	36.0063	1402.14	na	na		na	no		0	0	0	0	0	0	0	0	0	0	0	0	0
Sf._8253	Seifhennersdorf	Lower Oligocene	Fagaceae	Castaneophyllum	Castaneophyllum_lonchitiforme	evergreen_(evergreen)	tree_(tree)	dentate	F	F	F	EF	0.95381	1417.89	3.15164	4.85572	103.412	21.2969	1352.4	na	na		na	no		0	0	0	0	0	0	0	0	0	0	0	0	0
Sf._7237	Seifhennersdorf	Lower Oligocene	Ulmaceae	Zelkova	Zelkova_zelkovifolia	deciduous_(deciduous)	tree_(tree)	dentate	F	F	F	EF	0.97793	1438.67	3.15796	1.8159	67.5388	37.1931	1406.92	0.94807	1.84597	obs	70.1399	no		0	0	0	0	0	0	0	0	0	0	0	0	0
Sf._8137	Seifhennersdorf	Lower Oligocene	Ulmaceae	Ulmus	Ulmus_fischeri	deciduous_(deciduous)	tree_(tree)	dentate	F	F	F	EF	0.835724	1444.21	3.15963	1.88927	64.6172	34.2022	1206.96	na	na		na	no		0	0	0	0	0	0	0	0	0	0	0	0	0
Sf._4622/4676	Seifhennersdorf	Lower Oligocene	Sapindaceae	Acer	Acer_rueminianum	deciduous_(deciduous)	tree_(tree)	dentate	O or P	O,P	O,P	OP	0.854328	1444.76	3.15979	0.630504	50.6985	80.4095	1234.3	na	na		na	no		0	0	0	0	0	0	0	0	0	0	0	0	0
Sf._6:1,2	Seifhennersdorf	Lower Oligocene	Sapindaceae	Acer	Acer_angustilobum	deciduous_(deciduous)	tree_(tree)	dentate	P	P	P	OP	0.854798	1468.27	3.16681	0.999081	61.257	61.3133	1255.07	na	na		na	no		0	0	0	0	0	0	0	0	0	0	0	0	0
Sf._5415	Seifhennersdorf	Lower Oligocene	Juglandaceae	Carya	Carya_fragiliformis	deciduous_(deciduous)	tree_(tree)	dentate	F	F	F	EF	0.917546	1469.24	3.16709	3.16643	88.561	27.9687	1348.09	na	na		na	yes	margin	63.97	4.35396	4.74523	0	0	63.97	4.35396	0	0	0	0	0	0
Sf._2270:1,2	Seifhennersdorf	Lower Oligocene	Platanaceae	Platanus	Platanus_neptuni	deciduous_(deciduous)	tree_(tree)	dentate	E or F	E	E	EF	0.829289	1476.66	3.16928	4.29821	99.9458	23.2529	1224.58	1.89759	2.07188	obs	118	no		0	0	0	0	0	0	0	0	0	0	0	0	0
Sf._5408	Seifhennersdorf	Lower Oligocene	Juglandaceae	Carya	Carya_fragiliformis	deciduous_(deciduous)	tree_(tree)	dentate	F	F	F	EF	0.936289	1486.61	3.1722	4.26081	99.9719	23.4631	1391.89	na	na		na	yes	hole	14.995	1.00867	1.07731	14.995	1.00867	0	0	0	0	0	0	0	0
Sf._2144	Seifhennersdorf	Lower Oligocene	Betulaceae	Carpinus	Carpinus_grandis	deciduous_(deciduous)	tree_(tree)	dentate	F	F	F	EF	0.983643	1489.53	3.17305	1.67382	62.6055	37.4027	1465.17	1.25848	1.93418	obs	85.9366	no		0	0	0	0	0	0	0	0	0	0	0	0	0
Sf._6183a/6066	Seifhennersdorf	Lower Oligocene	Lauraceae	Laurophyllum	Laurophyllum_sp	evergreen_(evergreen)	tree_(tree)	entire	A or B	A,B	A,B	AB	0.88889	1498.04	3.17552	4.61118	114.476	24.8256	1331.59	1.36618	1.96048	obs	91.3016	no		0	0	0	0	0	0	0	0	0	0	0	0	0
Sf._4761a	Seifhennersdorf	Lower Oligocene	Betulaceae	Carpinus	Carpinus_roscheri	deciduous_(deciduous)	tree_(tree)	dentate	F	F	F	EF	0.97416	1506.22	3.17789	1.96811	69.6692	35.3991	1467.3	1.08717	1.88378	obs	76.5204	no		0	0	0	0	0	0	0	0	0	0	0	0	0
Sf._7831:1,2	Seifhennersdorf	Lower Oligocene	Betulaceae	Carpinus	Carpinus_grandis	deciduous_(deciduous)	tree_(tree)	dentate	F	F	F	EF	0.885146	1510.06	3.17899	1.72961	62.4066	36.0814	1336.62	na	na		na	no		0	0	0	0	0	0	0	0	0	0	0	0	0
Sf._10	Seifhennersdorf	Lower Oligocene	Sapindaceae	Acer	Acer_angustilobum	deciduous_(deciduous)	tree_(tree)	dentate	P	P	P	OP	0.801225	1511.94	3.17953	0.799294	68.5823	85.8036	1211.4	1.56183	2.00335	obs	100.775	no		0	0	0	0	0	0	0	0	0	0	0	0	0
Sf._3315,2	Seifhennersdorf	Lower Oligocene	Betulaceae	Carpinus	Carpinus_grandis	deciduous_(deciduous)	tree_(tree)	dentate	F	F	F	EF	0.944985	1517.17	3.18103	1.45843	56.6396	38.836	1433.7	1.58613	2.0079	obs	101.836	no		0	0	0	0	0	0	0	0	0	0	0	0	0
Sf._2532	Seifhennersdorf	Lower Oligocene	Lauraceae	Laurophyllum	Laurophyllum_sp	evergreen_(evergreen)	tree_(tree)	entire	A	A,B	A	AB	0.940071	1533.71	3.18574	6.40204	115.764	18.0824	1441.8	na	na		na	no		0	0	0	0	0	0	0	0	0	0	0	0	0
Sf._3390	Seifhennersdorf	Lower Oligocene	Lauraceae	Laurophyllum	Laurophyllum_acutimontanum	evergreen_(evergreen)	shrub to small tree	entire	A	A	A	AB	0.833256	1538.68	3.18715	4.08107	93.3252	22.8678	1282.12	1.00062	1.85272	obs	71.2387	no		0	0	0	0	0	0	0	0	0	0	0	0	0
Sf._8334 a	Seifhennersdorf	Lower Oligocene	Juglandaceae	Carya	Carya_fragiliformis	deciduous_(deciduous)	tree_(tree)	dentate	F	F	F	EF	0.76128	1546.14	3.18925	3.11618	87.9883	28.2359	1177.04	na	na		na	no		0	0	0	0	0	0	0	0	0	0	0	0	0
Sf._2389	Seifhennersdorf	Lower Oligocene	Cannabaceae	Celtis	Celtis_bohemica	deciduous_(deciduous)	tree_(tree)	dentate	F	F	F	EF	0.771843	1547.64	3.18967	2.77565	82.5191	29.7297	1194.53	1.51627	1.98966	obs	97.6474	no		0	0	0	0	0	0	0	0	0	0	0	0	0
Sf._4076	Seifhennersdorf	Lower Oligocene	Juglandaceae	Carya	Carya_fragiliformis	deciduous_(deciduous)	tree_(tree)	dentate	F	F	F	EF	0.959918	1549.65	3.19023	3.57462	103.43	28.9346	1487.54	1.16044	1.9007	obs	79.5616	no		0	0	0	0	0	0	0	0	0	0	0	0	0
Sf._1659	Seifhennersdorf	Lower Oligocene	Betulaceae	Carpinus	Carpinus_grandis	deciduous_(deciduous)	tree_(tree)	dentate	F	F	F	EF	0.97628	1567.84	3.1953	1.39309	56.4867	40.5477	1530.65	1.19947	1.90974	obs	81.2346	no		0	0	0	0	0	0	0	0	0	0	0	0	0
Sf._4354	Seifhennersdorf	Lower Oligocene	Juglandaceae	Carya	Carya_fragiliformis	deciduous_(deciduous)	tree_(tree)	dentate	F	F	F	EF	0.87447	1573.04	3.19674	2.4481	77.3369	31.5906	1375.58	0.865687	1.80099	obs	63.2396	no		0	0	0	0	0	0	0	0	0	0	0	0	0
Sf._1540	Seifhennersdorf	Lower Oligocene	Betulaceae	Carpinus	Carpinus_roscheri	deciduous_(deciduous)	tree_(tree)	dentate	F	F	F	EF	0.858344	1574.05	3.19702	1.53763	61.6109	40.0686	1351.08	na	na		na	no		0	0	0	0	0	0	0	0	0	0	0	0	0
Sf._1179	Seifhennersdorf	Lower Oligocene	Juglandaceae	Carya	Carya_fragiliformis	deciduous_(deciduous)	tree_(tree)	dentate	F	F	F	EF	0.753976	1583.94	3.19974	3.85554	95.2783	24.712	1194.25	na	na		na	no		0	0	0	0	0	0	0	0	0	0	0	0	0
Sf._6461:1,2	Seifhennersdorf	Lower Oligocene	Salicaceae	Populus	Populus_zaddachii	deciduous_(deciduous)	tree_(tree)	dentate	E or F	F	F	EF	0.988971	1589.45	3.20125	2.69431	85.2284	31.6327	1571.92	na	na		na	no		0	0	0	0	0	0	0	0	0	0	0	0	0
Sf._1186	Seifhennersdorf	Lower Oligocene	Dicotyledonae fam. inc. sedis	Dicotylophyllum	Dictoylophyllum_dentate	na	na	dentate	E or F	na	E,F	EF	0.988801	1590.48	3.20153	2.47069	73.6454	29.8076	1572.66	na	na		na	no		0	0	0	0	0	0	0	0	0	0	0	0	0
Sf._4494/4508	Seifhennersdorf	Lower Oligocene	Sapindaceae	Acer	Acer_cftricuspidatum	deciduous_(deciduous)	tree_(tree)	dentate	P	P	P	OP	0.865734	1605.93	3.20573	1.00203	73.1416	72.9935	1390.31	na	na		na	no		0	0	0	0	0	0	0	0	0	0	0	0	0
Sf._6465	Seifhennersdorf	Lower Oligocene	Salicaceae	Populus	Populus_zaddachii	deciduous_(deciduous)	tree_(tree)	dentate	E or F	F	F	EF	0.930293	1606.97	3.20601	3.18623	87.8972	27.5866	1494.95	1.44251	1.96687	obs	92.6557	no		0	0	0	0	0	0	0	0	0	0	0	0	0
Sf._4356	Seifhennersdorf	Lower Oligocene	Juglandaceae	Carya	Carya_fragiliformis	deciduous_(deciduous)	tree_(tree)	dentate	F	F	F	EF	0.87974	1611.77	3.2073	3.78495	99.7176	26.3458	1417.94	na	na		na	yes	hole/margin	64.044	3.97351	4.51668	26.751	1.65972	37.293	2.31379	0	0	0	0	0	0
Sf._4849	Seifhennersdorf	Lower Oligocene	Betulaceae	Ostrya	Ostrya_atlantidis	deciduous_(deciduous)	tree_(tree)	dentate	F	F	F	EF	0.827687	1613.16	3.20768	1.61934	63.2554	39.0625	1335.19	1.14252	1.88888	obs	77.4242	yes	hole	1.895	0.117472	0.141927	1.895	0.117472	0	0	0	0	0	0	0	0
Sf._5172	Seifhennersdorf	Lower Oligocene	Betulaceae	Carpinus	Carpinus_grandis	deciduous_(deciduous)	tree_(tree)	dentate	F	F	F	EF	0.970705	1615.61	3.20834	1.54411	58.8013	38.0811	1568.28	1.01883	1.85061	obs	70.8935	no		0	0	0	0	0	0	0	0	0	0	0	0	0
Sf._8488	Seifhennersdorf	Lower Oligocene	Betulaceae	Carpinus	Carpinus_roscheri	deciduous_(deciduous)	tree_(tree)	dentate	F	F	F	EF	0.982281	1615.97	3.20843	1.37049	56.0196	40.8755	1587.34	1.04442	1.8588	obs	72.2438	no		0	0	0	0	0	0	0	0	0	0	0	0	0
Sf._4404a	Seifhennersdorf	Lower Oligocene	Sapindaceae	Acer	Acer_angustilobum	deciduous_(deciduous)	tree_(tree)	dentate	P	P	P	OP	0.783322	1631.85	3.21268	0.78056	59.1373	75.7627	1278.26	0.963056	1.83027	obs	67.6497	no		0	0	0	0	0	0	0	0	0	0	0	0	0
Sf._1571	Seifhennersdorf	Lower Oligocene	Betulaceae	Carpinus	Carpinus_grandis	deciduous_(deciduous)	tree_(tree)	dentate	F	F	F	EF	0.971895	1644.08	3.21592	1.49676	59.1385	39.5109	1597.87	na	na		na	no		0	0	0	0	0	0	0	0	0	0	0	0	0
Sf._2162	Seifhennersdorf	Lower Oligocene	Betulaceae	Carpinus	Carpinus_roscheri	deciduous_(deciduous)	tree_(tree)	dentate	F	F	F	EF	0.88264	1648.14	3.21699	1.60572	64.8268	40.3725	1454.71	na	na		na	no		0	0	0	0	0	0	0	0	0	0	0	0	0
Sf._5980/5996	Seifhennersdorf	Lower Oligocene	Lauraceae	Daphnogene	Daphnogene_cinnamomifolia	evergreen_(evergreen)	shrub to small tree	entire	A or B	C,D	C,D	CD	0.754917	1648.16	3.217	4.62767	106.36	22.9834	1244.22	na	na		na	no		0	0	0	0	0	0	0	0	0	0	0	0	0
Sf._45	Seifhennersdorf	Lower Oligocene	Sapindaceae	Acer	Acer_cftricuspidatum	deciduous_(deciduous)	tree_(tree)	dentate	P	P	P	OP	0.923393	1648.32	3.21704	1.17843	64.5964	54.8156	1522.04	na	na		na	no		0	0	0	0	0	0	0	0	0	0	0	0	0
Sf._4362	Seifhennersdorf	Lower Oligocene	Juglandaceae	Carya	Carya_fragiliformis	deciduous_(deciduous)	tree_(tree)	dentate	F	F	F	EF	0.921063	1655.56	3.21895	2.95195	89.407	30.2875	1524.88	na	na		na	no		0	0	0	0	0	0	0	0	0	0	0	0	0
Sf._6422	Seifhennersdorf	Lower Oligocene	Platanaceae	Platanus	Platanus_neptuni	deciduous_(deciduous)	tree_(tree)	dentate	E or F	E	E	EF	0.993684	1677.55	3.22467	4.20661	104.618	24.87	1666.95	na	na		na	no		0	0	0	0	0	0	0	0	0	0	0	0	0
Sf._7558	Seifhennersdorf	Lower Oligocene	Fabaceae	Leguminosites	Leguminosites_sp	na	shrub to small tree	entire	B	B	B	AB	0.962814	1678.32	3.22487	1.62294	61.7666	38.0584	1615.91	na	na		na	no		0	0	0	0	0	0	0	0	0	0	0	0	0
Sf._8272	Seifhennersdorf	Lower Oligocene	Betulaceae	Carpinus	Carpinus_roscheri	deciduous_(deciduous)	tree_(tree)	dentate	F	F	F	EF	0.890541	1686.69	3.22704	1.51955	61.6423	40.5661	1502.07	na	na		na	no		0	0	0	0	0	0	0	0	0	0	0	0	0
Sf._6198	Seifhennersdorf	Lower Oligocene	Lauraceae	Laurophyllum	Laurophyllum_acutimontanum	evergreen_(evergreen)	shrub to small tree	entire	A	A	A	AB	0.890838	1700.77	3.23064	5.3962	112.826	20.9084	1515.11	na	na		na	no		0	0	0	0	0	0	0	0	0	0	0	0	0
Sf._1011	Seifhennersdorf	Lower Oligocene	Juglandaceae	Carya	Carya_fragiliformis	deciduous_(deciduous)	tree_(tree)	dentate	F	F	F	EF	0.880609	1700.85	3.23067	2.49645	87.977	35.2408	1497.78	na	na		na	yes	margin	33.175	1.9505	2.21494	0	0	33.175	1.9505	0	0	0	0	0	0
Sf._17:1,2	Seifhennersdorf	Lower Oligocene	Salicaceae	Salix	Salix_varians	deciduous_(deciduous)	shrub to small tree	dentate	E	F	E	EF	0.93369	1705.05	3.23174	2.77144	96.3689	34.7722	1591.99	na	na		na	no		0	0	0	0	0	0	0	0	0	0	0	0	0
Sf._8355	Seifhennersdorf	Lower Oligocene	Sapindaceae	Acer	Acer_rueminianum	deciduous_(deciduous)	tree_(tree)	dentate	P	O,P	P	OP	0.731953	1707.28	3.2323	1.05355	74.4206	70.6379	1249.65	na	na		na	no		0	0	0	0	0	0	0	0	0	0	0	0	0
Sf._4478	Seifhennersdorf	Lower Oligocene	Sapindaceae	Acer	Acer_angustilobum	deciduous_(deciduous)	tree_(tree)	dentate	P	P	P	OP	0.729801	1709.02	3.23275	0.906382	62.7658	69.2488	1247.24	na	na		na	no		0	0	0	0	0	0	0	0	0	0	0	0	0
Sf._7212	Seifhennersdorf	Lower Oligocene	Ulmaceae	Ulmus	Ulmus_fischeri	deciduous_(deciduous)	tree_(tree)	dentate	F	F	F	EF	0.972647	1713.61	3.23391	2.06387	75.5825	36.6218	1666.74	na	na		na	no		0	0	0	0	0	0	0	0	0	0	0	0	0
Sf._7236	Seifhennersdorf	Lower Oligocene	Ulmaceae	Ulmus	Ulmus_fischeri	deciduous_(deciduous)	tree_(tree)	dentate	F	F	F	EF	0.727037	1714.72	3.23419	1.71665	66.5263	38.7537	1246.66	1.21003	1.89779	obs	79.0305	yes	margin	224.627	13.0999	18.0183	0	0	224.627	13.0999	0	0	0	0	0	0
Sf._5312	Seifhennersdorf	Lower Oligocene	Betulaceae	Carpinus	Carpinus_grandis	deciduous_(deciduous)	tree_(tree)	dentate	F	F	F	EF	0.913221	1716.95	3.23476	1.30137	56.5476	43.4524	1567.95	1.26951	1.9135	obs	81.941	no		0	0	0	0	0	0	0	0	0	0	0	0	0
Sf._5617	Seifhennersdorf	Lower Oligocene	Juglandaceae	Carya	Carya_fragiliformis	deciduous_(deciduous)	tree_(tree)	dentate	F	F	F	EF	0.895843	1744.27	3.24161	3.07424	93.3627	30.3693	1562.6	na	na		na	yes	hole	12.49	0.716058	0.799311	12.49	0.716058	0	0	0	0	0	0	0	0
Sf._4437	Seifhennersdorf	Lower Oligocene	Juglandaceae	Cyclocarya	Cyclocarya _sp	deciduous_(deciduous)	tree_(tree)	dentate	F	F	F	EF	0.980512	1745.89	3.24202	5.36443	122.52	22.8393	1711.86	na	na		na	no		0	0	0	0	0	0	0	0	0	0	0	0	0
Sf._1554	Seifhennersdorf	Lower Oligocene	Betulaceae	Carpinus	Carpinus_roscheri	deciduous_(deciduous)	tree_(tree)	dentate	F	F	F	EF	0.906141	1746.01	3.24205	1.76514	69.2737	39.2454	1582.13	na	na		na	no		0	0	0	0	0	0	0	0	0	0	0	0	0
Sf._2023	Seifhennersdorf	Lower Oligocene	Betulaceae	Carpinus	Carpinus_roscheri	deciduous_(deciduous)	tree_(tree)	dentate	F	F	F	EF	0.981503	1750.47	3.24316	1.48722	64.6737	43.4861	1718.1	na	na		na	no		0	0	0	0	0	0	0	0	0	0	0	0	0
Sf._4742:1,2	Seifhennersdorf	Lower Oligocene	Betulaceae	Carpinus	Carpinus_grandis	deciduous_(deciduous)	tree_(tree)	dentate	F	F	F	EF	0.942274	1822.83	3.26075	1.35191	62.5464	46.2654	1717.6	1.79314	2.01816	obs	104.269	no		0	0	0	0	0	0	0	0	0	0	0	0	0
Sf._8353	Seifhennersdorf	Lower Oligocene	Sapindaceae	Acer	Acer_angustilobum	deciduous_(deciduous)	tree_(tree)	dentate	P	P	P	OP	0.812165	1827.62	3.26189	0.734176	67.3018	91.6698	1484.33	1.31066	1.91372	obs	81.9825	no		0	0	0	0	0	0	0	0	0	0	0	0	0
Sf._6100	Seifhennersdorf	Lower Oligocene	Dicotyledonae fam. inc. sedis	Dicotylophyllum	Dicotylophyllum_dentate	na	na	dentate	E or F	na	E,F	EF	0.934758	1885.11	3.27534	4.70049	113.044	24.0494	1762.12	na	na		na	no		0	0	0	0	0	0	0	0	0	0	0	0	0
Sf. 36:1,2	Seifhennersdorf	Lower Oligocene	Sapindaceae	Acer	Acer_cftricuspidatum	deciduous_(deciduous)	tree_(tree)	dentate	P	P	P	OP	0.797118	1888.67	3.27616	1.16018	68.0829	58.6828	1505.49	0.878157	1.7754	obs	59.6208	no		0	0	0	0	0	0	0	0	0	0	0	0	0
Sf._4626/4625	Seifhennersdorf	Lower Oligocene	Sapindaceae	Acer	Acer_cftricuspidatum	deciduous_(deciduous)	tree_(tree)	dentate	P	P	P	OP	0.955035	1900.02	3.27876	0.877541	68.3979	77.9427	1814.59	na	na		na	no		0	0	0	0	0	0	0	0	0	0	0	0	0
Sf._6237	Seifhennersdorf	Lower Oligocene	Lauraceae	Laurophyllum	Laurophyllum_sp	evergreen_(evergreen)	tree_(tree)	entire	A	A,B	A	AB	0.971921	1901.48	3.27909	4.33205	105.321	24.3121	1848.09	1.9931	2.04623	obs	111.231	no		0	0	0	0	0	0	0	0	0	0	0	0	0
Sf._4441/4445	Seifhennersdorf	Lower Oligocene	Magnoliaceae	Magnolia	Magnolia_seifhennersdorfensis	evergreen_(evergreen)	tree_(tree)	entire	A	A,B	A	AB	0.958874	1904.16	3.2797	3.08681	96.743	31.3407	1825.84	na	na		na	no		0	0	0	0	0	0	0	0	0	0	0	0	0
Sf._2693	Seifhennersdorf	Lower Oligocene	Vitaceae	Ampelopsis	Ampelopsis_hibschii	deciduous_(deciduous)	shrub, climber, scrambler	entire	na	F,J	na	na	0.869702	1910.48	3.28114	1.22696	61.5	50.1239	1661.55	na	na		na	no		0	0	0	0	0	0	0	0	0	0	0	0	0
Sf._8190:1,2	Seifhennersdorf	Lower Oligocene	Platanaceae	Platanus	Platanus_neptuni	deciduous_(deciduous)	tree_(tree)	dentate	E	E	E	EF	0.963876	1917.57	3.28275	2.88341	93.249	32.3399	1848.3	na	na		na	no		0	0	0	0	0	0	0	0	0	0	0	0	0
Sf._4787a	Seifhennersdorf	Lower Oligocene	Ulmaceae	Ulmus	Ulmus_fischeri	deciduous_(deciduous)	tree_(tree)	dentate	F	F	F	EF	0.913906	1926.2	3.2847	1.83802	76.7313	41.7467	1760.37	na	na		na	no		0	0	0	0	0	0	0	0	0	0	0	0	0
Sf._2001	Seifhennersdorf	Lower Oligocene	Betulaceae	Carpinus	Carpinus_grandis	deciduous_(deciduous)	tree_(tree)	dentate	F	F	F	EF	0.914218	1931.5	3.2859	1.58594	67.3954	42.4954	1765.82	na	na		na	no		0	0	0	0	0	0	0	0	0	0	0	0	0
Sf._8662a	Seifhennersdorf	Lower Oligocene	Sapindaceae	Acer	Acer_angustilobum	deciduous_(deciduous)	tree_(tree)	dentate	P	P	P	OP	0.830365	1956.5	3.29148	0.788493	67.9589	86.1884	1624.61	1.11638	1.84918	obs	70.6617	no		0	0	0	0	0	0	0	0	0	0	0	0	0
Sf._4461/4670a	Seifhennersdorf	Lower Oligocene	Sapindaceae	Acer	Acer_angustilobum	deciduous_(deciduous)	tree_(tree)	dentate	P	P	P	OP	0.725425	1966.51	3.2937	0.817864	69.0502	84.4274	1426.55	0.570994	1.62587	obs	42.2547	no		0	0	0	0	0	0	0	0	0	0	0	0	0
Sf._2700	Seifhennersdorf	Lower Oligocene	Juglandaceae	Carya	Carya_fragiliformis	deciduous_(deciduous)	tree_(tree)	dentate	F	F	F	EF	0.961718	1982.42	3.2972	3.05191	96.4574	31.6056	1906.53	na	na		na	no		0	0	0	0	0	0	0	0	0	0	0	0	0
Sf._30	Seifhennersdorf	Lower Oligocene	Sapindaceae	Acer	Acer_cftricuspidatum	deciduous_(deciduous)	tree_(tree)	dentate	P	P	P	OP	0.906574	1984.52	3.29766	1.06317	68.6129	64.536	1799.12	na	na		na	no		0	0	0	0	0	0	0	0	0	0	0	0	0
Sf._1923	Seifhennersdorf	Lower Oligocene	Betulaceae	Carpinus	Carpinus_grandis	deciduous_(deciduous)	tree_(tree)	dentate	F	F	F	EF	0.98557	1996.81	3.30034	1.45215	62.5195	43.0532	1968	0.953148	1.79335	obs	62.1369	no		0	0	0	0	0	0	0	0	0	0	0	0	0
Sf._5274	Seifhennersdorf	Lower Oligocene	Betulaceae	Carpinus	Carpinus_grandis	deciduous_(deciduous)	tree_(tree)	dentate	F	F	F	EF	0.992441	1997.95	3.30058	1.15184	58.6615	50.9288	1982.85	0.842288	1.75223	obs	56.5235	no		0	0	0	0	0	0	0	0	0	0	0	0	0
Sf._6316:1,2	Seifhennersdorf	Lower Oligocene	Magnoliaceae	Magnolia	Magnolia_seifhennersdorfensis	evergreen_(evergreen)	tree_(tree)	entire	A	A,B	A	AB	0.958846	2004.44	3.30199	3.26475	99.968	30.6204	1921.95	na	na		na	no		0	0	0	0	0	0	0	0	0	0	0	0	0
Sf._1326:1,2	Seifhennersdorf	Lower Oligocene	Juglandaceae	Carya	Carya_fragiliformis	deciduous_(deciduous)	tree_(tree)	dentate	F	F	F	EF	0.734609	2007.21	3.30259	2.81951	90.5006	32.098	1474.52	na	na		na	no		0	0	0	0	0	0	0	0	0	0	0	0	0
Sf._4884	Seifhennersdorf	Lower Oligocene	Betulaceae	Carpinus	Carpinus_grandis	deciduous_(deciduous)	tree_(tree)	dentate	F	F	F	EF	0.944462	2013.64	3.30398	1.44305	65.3393	45.2787	1901.8	0.598865	1.63776	obs	43.4269	no		0	0	0	0	0	0	0	0	0	0	0	0	0
Sf._4120/4124	Seifhennersdorf	Lower Oligocene	Sapindaceae	Acer	Acer_angustilobum	deciduous_(deciduous)	tree_(tree)	dentate	P	P	P	OP	0.744474	2015.77	3.30444	1.04423	66.9762	64.139	1500.69	na	na		na	no		0	0	0	0	0	0	0	0	0	0	0	0	0
Sf._1	Seifhennersdorf	Lower Oligocene	Sapindaceae	Acer	Acer_rueminianum	deciduous_(deciduous)	tree_(tree)	dentate	P	O,P	P	OP	0.737983	2021.34	3.30564	0.757589	71.553	94.4484	1491.71	2.19055	2.06743	obs	116.796	yes	hole	2.421	0.119772	0.162297	2.421	0.119772	0	0	0	0	0	0	0	0
Sf._4444	Seifhennersdorf	Lower Oligocene	Fagaceae	Castaneophyllum	Castaneophyllum_lonchitiforme	evergreen_(evergreen)	tree_(tree)	dentate	F	F	F	EF	0.877936	2034.92	3.30855	4.41915	122.322	27.6799	1786.53	na	na		na	no		0	0	0	0	0	0	0	0	0	0	0	0	0
Sf._1830	Seifhennersdorf	Lower Oligocene	Betulaceae	Carpinus	Carpinus_grandis	deciduous_(deciduous)	tree_(tree)	dentate	F	F	F	EF	0.960817	2037.71	3.30914	1.58133	70.0805	44.3173	1957.87	na	na		na	no		0	0	0	0	0	0	0	0	0	0	0	0	0
Sf._2549	Seifhennersdorf	Lower Oligocene	Juglandaceae	Carya	Carya_fragiliformis	deciduous_(deciduous)	tree_(tree)	dentate	F	F	F	EF	0.809328	2069.73	3.31591	2.91887	96.0987	32.9232	1675.09	na	na		na	no		0	0	0	0	0	0	0	0	0	0	0	0	0
Sf._5622	Seifhennersdorf	Lower Oligocene	Juglandaceae	Cyclocarya	Cyclocarya _sp	deciduous_(deciduous)	tree_(tree)	dentate	F	F	F	EF	0.874596	2073.39	3.31668	4.39913	123.235	28.0136	1813.38	na	na		na	no		0	0	0	0	0	0	0	0	0	0	0	0	0
Sf._2313	Seifhennersdorf	Lower Oligocene	Betulaceae	Alnus	Alnus_gaudinii	deciduous_(deciduous)	tree_(tree)	dentate	E or F	E	E	EF	0.89059	2076	3.31723	3.66932	107.404	29.2707	1848.86	1.05305	1.81997	obs	66.0649	no		0	0	0	0	0	0	0	0	0	0	0	0	0
Sf._4724	Seifhennersdorf	Lower Oligocene	Betulaceae	Betula	Betula_alboides	deciduous_(deciduous)	tree_(tree)	dentate	F	F	F	EF	0.845632	2095.02	3.32119	1.3771	67.812	49.2426	1771.62	1.30668	1.89006	obs	77.6354	no		0	0	0	0	0	0	0	0	0	0	0	0	0
Sf._82b	Seifhennersdorf	Lower Oligocene	Sapindaceae	Acer	Acer_cftricuspidatum	deciduous_(deciduous)	tree_(tree)	dentate	P	P	P	OP	0.711804	2105.43	3.32334	0.738115	60.209	81.5712	1498.65	na	na		na	no		0	0	0	0	0	0	0	0	0	0	0	0	0
Sf._5479	Seifhennersdorf	Lower Oligocene	Juglandaceae	Carya	Carya_fragiliformis	deciduous_(deciduous)	tree_(tree)	dentate	F	F	F	EF	0.858993	2128.71	3.32812	4.17306	130.584	31.2922	1828.55	na	na		na	no		0	0	0	0	0	0	0	0	0	0	0	0	0
Sf._4069	Seifhennersdorf	Lower Oligocene	Sapindaceae	Acer	Acer_cftricuspidatum	deciduous_(deciduous)	tree_(tree)	dentate	P	P	P	OP	0.837916	2140.78	3.33057	0.915027	72.6463	79.3925	1793.8	1.04384	1.81196	obs	64.8571	no		0	0	0	0	0	0	0	0	0	0	0	0	0
Sf._7267b/7274	Seifhennersdorf	Lower Oligocene	Cornaceae	Cornus	Cornus_sp	deciduous_(deciduous)	shrub to small tree	entire	B	B	B	AB	0.915468	2160.19	3.33449	2.33222	83.0184	35.5963	1977.59	na	na		na	no		0	0	0	0	0	0	0	0	0	0	0	0	0
Sf._8290	Seifhennersdorf	Lower Oligocene	Sapindaceae	Acer	Acer_cftricuspidatum	deciduous_(deciduous)	tree_(tree)	dentate	P	P	P	OP	0.927945	2170.86	3.33663	0.905566	75.2896	83.141	2014.44	1.00077	1.79566	obs	62.4688	no		0	0	0	0	0	0	0	0	0	0	0	0	0
Sf._4540	Seifhennersdorf	Lower Oligocene	Sapindaceae	Acer	Acer_rueminianum	deciduous_(deciduous)	tree_(tree)	dentate	P	O,P	P	OP	0.831621	2176.24	3.33771	1.19867	75.2759	62.7998	1809.81	na	na		na	no		0	0	0	0	0	0	0	0	0	0	0	0	0
Sf._5179	Seifhennersdorf	Lower Oligocene	Betulaceae	Carpinus	Carpinus_grandis	deciduous_(deciduous)	tree_(tree)	dentate	F	F	F	EF	0.909951	2178.47	3.33815	1.49355	69.3586	46.4389	1982.3	0.841989	1.73776	obs	54.6714	no		0	0	0	0	0	0	0	0	0	0	0	0	0
Sf._4242:1,2	Seifhennersdorf	Lower Oligocene	Betulaceae	Carpinus	Carpinus_roscheri	deciduous_(deciduous)	tree_(tree)	dentate	F	F	F	EF	0.916668	2183.62	3.33918	1.11471	58.7642	52.717	2001.65	na	na		na	no		0	0	0	0	0	0	0	0	0	0	0	0	0
Sf._6160	Seifhennersdorf	Lower Oligocene	Betulaceae	Alnus	Alnus_gaudinii	deciduous_(deciduous)	tree_(tree)	dentate	E or F	E	E	EF	0.94757	2191.54	3.34075	4.12882	115.474	27.9678	2076.63	0.890192	1.75524	obs	56.9167	no		0	0	0	0	0	0	0	0	0	0	0	0	0
Sf._2656	Seifhennersdorf	Lower Oligocene	Magnoliaceae	Magnolia	Magnolia_seifhennersdorfensis	evergreen_(evergreen)	tree_(tree)	entire	A	A,B	A	AB	0.825322	2227.25	3.34777	2.34878	85.966	36.6003	1838.2	na	na		na	no		0	0	0	0	0	0	0	0	0	0	0	0	0
Sf._6333:1,2	Seifhennersdorf	Lower Oligocene	Magnoliaceae	Magnolia	Magnolia_seifhennersdorfensis	evergreen_(evergreen)	tree_(tree)	entire	A	A,B	A	AB	0.923556	2236.23	3.34952	2.75813	96.1804	34.8716	2065.29	na	na		na	no		0	0	0	0	0	0	0	0	0	0	0	0	0
Sf._6608	Seifhennersdorf	Lower Oligocene	Betulaceae	Alnus	Alnus_gaudinii	deciduous_(deciduous)	tree_(tree)	dentate	E or F	E	E	EF	0.935288	2243.41	3.35091	3.51589	107.285	30.5144	2098.23	1.08076	1.81572	obs	65.4217	no		0	0	0	0	0	0	0	0	0	0	0	0	0
Sf._6319/5992b	Seifhennersdorf	Lower Oligocene	Magnoliaceae	Magnolia	Magnolia_seifhennersdorfensis	evergreen_(evergreen)	tree_(tree)	entire	A	A,B	A	AB	0.937495	2253.44	3.35285	2.53678	95.0055	37.4512	2112.59	1.20863	1.85209	obs	71.1354	no		0	0	0	0	0	0	0	0	0	0	0	0	0
Sf._3325a,b	Seifhennersdorf	Lower Oligocene	Magnoliaceae	Magnolia	Magnolia_seifhennersdorfensis	evergreen_(evergreen)	tree_(tree)	entire	A	A,B	A	AB	0.75749	2282.39	3.35839	2.21849	85.3785	38.485	1728.89	na	na		na	no		0	0	0	0	0	0	0	0	0	0	0	0	0
Sf._4839	Seifhennersdorf	Lower Oligocene	Betulaceae	Carpinus	Carpinus_roscheri	deciduous_(deciduous)	tree_(tree)	dentate	F	F	F	EF	0.969781	2284.44	3.35878	1.31516	66.4256	50.5077	2215.4	1.35531	1.88782	obs	77.2368	no		0	0	0	0	0	0	0	0	0	0	0	0	0
Sf._5478a	Seifhennersdorf	Lower Oligocene	Lauraceae	Laurophyllum	Laurophyllum_sp	evergreen_(evergreen)	tree_(tree)	entire	A	A,B	A	AB	0.918255	2308.61	3.36335	5.78577	141.899	24.5255	2119.89	1.20814	1.84794	obs	70.4594	no		0	0	0	0	0	0	0	0	0	0	0	0	0
Sf._35 (II)	Seifhennersdorf	Lower Oligocene	Betulaceae	Carpinus	Carpinus_grandis	deciduous_(deciduous)	tree_(tree)	dentate	F	F	F	EF	0.937781	2317.22	3.36497	1.19517	64.126	53.6542	2173.05	1.30952	1.87406	obs	74.8267	no		0	0	0	0	0	0	0	0	0	0	0	0	0
Sf._4514	Seifhennersdorf	Lower Oligocene	Sapindaceae	Acer	Acer_rueminianum	deciduous_(deciduous)	tree_(tree)	dentate	P	O,P	P	OP	0.730052	2321.65	3.3658	0.882554	74.2764	84.1608	1694.92	0.880933	1.7422	obs	55.2334	no		0	0	0	0	0	0	0	0	0	0	0	0	0
Sf._5376	Seifhennersdorf	Lower Oligocene	Juglandaceae	Carya	Carya_fragiliformis	deciduous_(deciduous)	tree_(tree)	dentate	E or F	F	F	EF	0.916725	2331.9	3.36771	4.05269	129.088	31.8525	2137.71	na	na		na	no		0	0	0	0	0	0	0	0	0	0	0	0	0
Sf._4810b	Seifhennersdorf	Lower Oligocene	Betulaceae	Carpinus	Carpinus_grandis	deciduous_(deciduous)	tree_(tree)	dentate	F	F	F	EF	0.951617	2349.46	3.37097	1.39816	68.0882	48.6986	2235.79	0.857256	1.73119	obs	53.8501	no		0	0	0	0	0	0	0	0	0	0	0	0	0
Sf._2098:1,2	Seifhennersdorf	Lower Oligocene	Platanaceae	Platanus	Platanus_neptuni	deciduous_(deciduous)	tree_(tree)	dentate	E	E	E	EF	0.840016	2357.3	3.37241	4.80379	132.716	27.6273	1980.17	1.32312	1.87464	obs	74.927	no		0	0	0	0	0	0	0	0	0	0	0	0	0
Sf._8534	Seifhennersdorf	Lower Oligocene	Betulaceae	Carpinus	Carpinus_grandis	deciduous_(deciduous)	tree_(tree)	dentate	F	F	F	EF	0.951109	2357.65	3.37248	1.55667	73.6784	47.3309	2242.39	1.08764	1.80959	obs	64.5043	no		0	0	0	0	0	0	0	0	0	0	0	0	0
Sf._3022	Seifhennersdorf	Lower Oligocene	Sapindaceae	Acer	Acer_cftricuspidatum	deciduous_(deciduous)	tree_(tree)	dentate	P	P	P	OP	0.943394	2359.54	3.37283	1.09011	75.599	69.3501	2225.98	na	na		na	no		0	0	0	0	0	0	0	0	0	0	0	0	0
Sf._3733	Seifhennersdorf	Lower Oligocene	Ulmaceae	Ulmus	Ulmus_fischeri	deciduous_(deciduous)	tree_(tree)	dentate	F	F	F	EF	0.817373	2367.63	3.37431	1.47004	70.9817	48.2854	1935.24	na	na		na	no		0	0	0	0	0	0	0	0	0	0	0	0	0
Sf._4673/4669	Seifhennersdorf	Lower Oligocene	Sapindaceae	Acer	Acer_cftricuspidatum	deciduous_(deciduous)	tree_(tree)	dentate	P	P	P	OP	0.87574	2375.03	3.37567	1.1833	75.8955	64.139	2079.91	na	na		na	no		0	0	0	0	0	0	0	0	0	0	0	0	0
Sf._4581	Seifhennersdorf	Lower Oligocene	Sapindaceae	Acer	Acer_angustilobum	deciduous_(deciduous)	tree_(tree)	dentate	P	P	P	OP	0.717644	2395.83	3.37946	0.840733	81.0674	96.4247	1719.36	1.35839	1.88068	obs	75.9763	no		0	0	0	0	0	0	0	0	0	0	0	0	0
Sf._4509	Seifhennersdorf	Lower Oligocene	Simaroubaceae	Ailanthus	Ailanthus_prescheri	deciduous_(deciduous)	tree_(tree)	dentate	F	E,F	F	EF	0.748756	2433.48	3.38623	2.9089	106.801	36.7152	1822.08	na	na		na	no		0	0	0	0	0	0	0	0	0	0	0	0	0
Sf._5331:1,2	Seifhennersdorf	Lower Oligocene	Betulaceae	Alnus	Alnus_gaudinii	deciduous_(deciduous)	tree_(tree)	dentate	E or F	E	E	EF	0.876892	2437.91	3.38702	1.99012	88.0857	44.2614	2137.79	na	na		na	no		0	0	0	0	0	0	0	0	0	0	0	0	0
Sf._4511:1,2	Seifhennersdorf	Lower Oligocene	Sapindaceae	Acer	Acer_angustilobum	deciduous_(deciduous)	tree_(tree)	dentate	P	P	P	OP	0.881	2450.48	3.38925	1.55539	96.8304	62.2546	2158.88	1.58508	1.92814	obs	84.7508	no		0	0	0	0	0	0	0	0	0	0	0	0	0
Sf._6618a	Seifhennersdorf	Lower Oligocene	Fagaceae	Castaneophyllum	Castaneophyllum_lonchitiforme	evergreen_(evergreen)	tree_(tree)	dentate	F	F	F	EF	0.956703	2485.34	3.39539	5.65734	144.738	25.5841	2377.74	na	na		na	no		0	0	0	0	0	0	0	0	0	0	0	0	0
Sf._8269	Seifhennersdorf	Lower Oligocene	Cornaceae	Nyssa	Nyssa_altenburgensis	deciduous_(deciduous)	tree_(tree)	dentate	F	E	F	EF	0.955667	2509.54	3.39959	2.61142	108.62	41.594	2398.29	na	na		na	no		0	0	0	0	0	0	0	0	0	0	0	0	0
Sf._5200	Seifhennersdorf	Lower Oligocene	Betulaceae	Carpinus	Carpinus_grandis	deciduous_(deciduous)	tree_(tree)	dentate	F	F	F	EF	0.906799	2519.42	3.4013	1.73481	82.2549	47.4144	2284.61	na	na		na	no		0	0	0	0	0	0	0	0	0	0	0	0	0
Sf._5573/6519	Seifhennersdorf	Lower Oligocene	Simaroubaceae	Ailanthus	Ailanthus_prescheri	deciduous_(deciduous)	tree_(tree)	dentate	E or F	E,F	E,F	EF	0.781394	2567.47	3.40951	4.2874	132.765	30.9663	2006.2	na	na		na	no		0	0	0	0	0	0	0	0	0	0	0	0	0
Sf._8191	Seifhennersdorf	Lower Oligocene	Betulaceae	Carpinus	Carpinus_roscheri	deciduous_(deciduous)	tree_(tree)	dentate	F	F	F	EF	0.977556	2574.94	3.41077	1.487	75.1543	50.5408	2517.15	1.05063	1.78347	obs	60.7398	no		0	0	0	0	0	0	0	0	0	0	0	0	0
Sf._2713	Seifhennersdorf	Lower Oligocene	Cornaceae	Cornus	Cornus_sp	deciduous_(deciduous)	shrub to small tree	entire	B	B	B	AB	0.910028	2594.65	3.41408	2.47802	94.3828	38.088	2361.2	na	na		na	no		0	0	0	0	0	0	0	0	0	0	0	0	0
Sf._8277	Seifhennersdorf	Lower Oligocene	?Lythraceae	Apocynophyllum	Apocynophyllum_neriifolium	deciduous_(deciduous)	shrub_climber_scrambler	entire	A	A	A	AB	0.898234	2603.58	3.41557	3.79148	126.09	33.256	2338.62	na	na		na	no		0	0	0	0	0	0	0	0	0	0	0	0	0
Sf._8434	Seifhennersdorf	Lower Oligocene	Betulaceae	Carpinus	Carpinus_grandis	deciduous_(deciduous)	tree_(tree)	dentate	F	F	F	EF	0.937766	2626.09	3.41931	1.50193	75.0606	49.976	2462.66	1.018	1.76974	obs	58.8495	no		0	0	0	0	0	0	0	0	0	0	0	0	0
Sf._5473 a	Seifhennersdorf	Lower Oligocene	Juglandaceae	Carya	Carya_fragiliformis	deciduous_(deciduous)	tree_(tree)	dentate	E or F	F	F	EF	0.858775	2628.06	3.41964	3.9086	130.377	33.3565	2256.91	1.66057	1.93198	obs	85.5018	no		0	0	0	0	0	0	0	0	0	0	0	0	0
Sf._4145:1,2a	Seifhennersdorf	Lower Oligocene	Sapindaceae	Acer	Acer_palaeosaccharinum	deciduous_(deciduous)	tree_(tree)	dentate	P	P	P	OP	0.771947	2654.2	3.42393	0.919076	74.7382	81.3188	2048.9	0.959507	1.74834	obs	56.0199	no		0	0	0	0	0	0	0	0	0	0	0	0	0
Sf._1586 (II)	Seifhennersdorf	Lower Oligocene	Betulaceae	Carpinus	Carpinus_roscheri	deciduous_(deciduous)	tree_(tree)	dentate	F	F	F	EF	0.920029	2658.47	3.42463	1.46447	76.2874	52.0923	2445.87	na	na		na	yes	hole	121.367	4.5653	4.96213	121.367	4.5653	0	0	0	0	0	0	0	0
Sf._8408	Seifhennersdorf	Lower Oligocene	Betulaceae	Carpinus	Carpinus_roscheri	deciduous_(deciduous)	tree_(tree)	dentate	F	F	F	EF	0.941361	2662.72	3.42533	1.81677	87.7114	48.2788	2506.58	1.12767	1.80139	obs	63.2982	no		0	0	0	0	0	0	0	0	0	0	0	0	0
Sf._1976	Seifhennersdorf	Lower Oligocene	Betulaceae	Carpinus	Carpinus_roscheri	deciduous_(deciduous)	tree_(tree)	dentate	F	F	F	EF	0.929478	2757.37	3.44049	1.3967	74.1669	53.1017	2562.91	na	na		na	no		0	0	0	0	0	0	0	0	0	0	0	0	0
Sf._8189	Seifhennersdorf	Lower Oligocene	Juglandaceae	Carya	Carya_fragiliformis	deciduous_(deciduous)	tree_(tree)	dentate	F	F	F	EF	0.865407	2863.63	3.45692	3.57133	126.515	35.4252	2478.2	na	na		na	no		0	0	0	0	0	0	0	0	0	0	0	0	0
Sf._2133	Seifhennersdorf	Lower Oligocene	Betulaceae	Carpinus	Carpinus_grandis	deciduous_(deciduous)	tree_(tree)	dentate	E or F	F	F	EF	0.943291	2883.84	3.45997	1.49722	79.1531	52.8668	2720.3	na	na		na	no		0	0	0	0	0	0	0	0	0	0	0	0	0
Sf._5591/7695a	Seifhennersdorf	Lower Oligocene	Juglandaceae	Carya	Carya_fragiliformis	deciduous_(deciduous)	tree_(tree)	dentate	F	F	F	EF	0.925728	3060.24	3.48575	4.56176	147.261	32.2815	2832.95	na	na		na	no		0	0	0	0	0	0	0	0	0	0	0	0	0
Sf._4672/4607	Seifhennersdorf	Lower Oligocene	Sapindaceae	Acer	Acer_angustilobum	deciduous_(deciduous)	tree_(tree)	dentate	P	P	P	OP	0.720781	3261.59	3.51343	0.950421	95.7662	100.762	2350.89	1.0009	1.72817	obs	53.4771	no		0	0	0	0	0	0	0	0	0	0	0	0	0
Sf._5120	Seifhennersdorf	Lower Oligocene	Betulaceae	Carpinus	Carpinus_grandis	deciduous_(deciduous)	tree_(tree)	dentate	F	F	F	EF	0.938009	3340.24	3.52378	1.30764	80.3541	61.4496	3133.18	1.0202	1.73055	obs	53.7717	no		0	0	0	0	0	0	0	0	0	0	0	0	0
Sf._4503:1,2a	Seifhennersdorf	Lower Oligocene	Sapindaceae	Acer	Acer_angustilobum	deciduous_(deciduous)	tree_(tree)	dentate	P	P	P	OP	0.899941	3344.54	3.52434	1.10252	98.6424	89.4703	3009.89	1.2071	1.78616	obs	61.116	no		0	0	0	0	0	0	0	0	0	0	0	0	0
Sf._6619	Seifhennersdorf	Lower Oligocene	Salicaceae	Populus	Populus_zaddachii	deciduous_(deciduous)	tree_(tree)	dentate	F	F	F	EF	0.840203	3351.55	3.52525	2.34477	109.979	46.9042	2815.98	na	na		na	no		0	0	0	0	0	0	0	0	0	0	0	0	0
Sf._8233:1,2b	Seifhennersdorf	Lower Oligocene	Sapindaceae	Acer	Acer_angustilobum	deciduous_(deciduous)	tree_(tree)	dentate	P	P	P	OP	0.754846	3458.67	3.53891	0.80354	87.8502	109.329	2610.77	na	na		na	no		0	0	0	0	0	0	0	0	0	0	0	0	0
Sf._5511	Seifhennersdorf	Lower Oligocene	Juglandaceae	Carya	Carya_fragiliformis	deciduous_(deciduous)	tree_(tree)	dentate	E or F	F	F	EF	0.753541	3492.29	3.54311	4.03298	156.906	38.9057	2631.59	na	na		na	no		0	0	0	0	0	0	0	0	0	0	0	0	0
Sf._4a	Seifhennersdorf	Lower Oligocene	Juglandaceae	Carya	Carya_fragiliformis	deciduous_(deciduous)	tree_(tree)	dentate	F	F	F	EF	0.966793	3559.95	3.55144	3.18205	135.824	42.6844	3441.74	na	na		na	no		0	0	0	0	0	0	0	0	0	0	0	0	0
Sf._6325a	Seifhennersdorf	Lower Oligocene	Magnoliaceae	Magnolia	Magnolia_seifhennersdorfensis	evergreen_(evergreen)	tree_(tree)	entire	A	A,B	A	AB	0.868528	3610.33	3.55755	3.12651	123.726	39.5733	3135.67	na	na		na	no		0	0	0	0	0	0	0	0	0	0	0	0	0
Sf._4665:1,2	Seifhennersdorf	Lower Oligocene	Sapindaceae	Acer	Acer_rueminianum	deciduous_(deciduous)	tree_(tree)	dentate	P	O,P	P	OP	0.840314	3638.6	3.56093	0.642112	94.1542	146.632	3057.57	0.95618	1.69486	obs	49.5285	no		0	0	0	0	0	0	0	0	0	0	0	0	0
Sf._7266:1,2	Seifhennersdorf	Lower Oligocene	Dicotyledonae fam. inc. sedis	Dicotylophyllum	Dicotylophyllum_sp2	deciduous_(deciduous)	na	dentate	F	F	F	EF	0.934722	3638.66	3.56094	2.863	117.916	41.1862	3401.14	1.33261	1.80499	obs	63.8253	no		0	0	0	0	0	0	0	0	0	0	0	0	0
Sf._6460:1,2	Seifhennersdorf	Lower Oligocene	Salicaceae	Populus	Populus_zaddachii	deciduous_(deciduous)	tree_(tree)	dentate	F	F	F	EF	0.795638	3756.13	3.57474	2.22381	108.454	48.7697	2988.52	na	na		na	no		0	0	0	0	0	0	0	0	0	0	0	0	0
Sf._4372:1,2	Seifhennersdorf	Lower Oligocene	Fagaceae	Eotrigonobalanus	cfEotrigonobalanus_furcinervis	evergreen_(evergreen)	tree_(tree)	entire	B	A,B	B	AB	0.875449	3887.39	3.58966	3.81757	154.573	40.4898	3403.21	1.88567	1.90921	obs	81.1346	no		0	0	0	0	0	0	0	0	0	0	0	0	0
Sf._6317/6318	Seifhennersdorf	Lower Oligocene	Magnoliaceae	Magnolia	Magnolia_seifhennersdorfensis	evergreen_(evergreen)	tree_(tree)	entire	A	A,B	A	AB	0.773803	4045.56	3.60698	2.47347	125.734	50.8331	3130.46	na	na		na	no		0	0	0	0	0	0	0	0	0	0	0	0	0
Sf._1616 (II)	Seifhennersdorf	Lower Oligocene	Betulaceae	Carpinus	Carpinus_roscheri	deciduous_(deciduous)	tree_(tree)	dentate	F	F	F	EF	0.835821	4159.78	3.61907	1.32933	88.5695	66.6271	3476.83	na	na		na	yes	hole/margin	138.209	3.32251	3.97514	13.966	0.335739	124.243	2.98677	0	0	0	0	0	0
Sf._8233:1,2a	Seifhennersdorf	Lower Oligocene	Cornaceae	Nyssa	Nyssa_altenburgensis	deciduous_(deciduous)	tree_(tree)	dentate	F	E	F	EF	0.908432	4250.55	3.62845	2.78205	146.078	52.5074	3861.34	na	na		na	no		0	0	0	0	0	0	0	0	0	0	0	0	0
Sf._4452	Seifhennersdorf	Lower Oligocene	Salicaceae	Populus	Populus_zaddachii	deciduous_(deciduous)	tree_(tree)	dentate	F	F	F	EF	0.787217	4491.67	3.65241	1.93288	111.156	57.508	3535.92	na	na		na	no		0	0	0	0	0	0	0	0	0	0	0	0	0
Sf._20	Seifhennersdorf	Lower Oligocene	Lauraceae	Daphnogene	Daphnogene_cinnamomifolia	evergreen_(evergreen)	shrub to small tree	entire	C	C,D	C	CD	0.732504	4539.03	3.65696	2.12693	121.621	57.1818	3324.85	na	na		na	no		0	0	0	0	0	0	0	0	0	0	0	0	0
Sf._7557	Seifhennersdorf	Lower Oligocene	Salicaceae	Populus	Populus_zaddachii	deciduous_(deciduous)	tree_(tree)	dentate	E or F	F	F	EF	0.934835	4560.84	3.65904	1.87039	112.763	60.2884	4263.63	na	na		na	no		0	0	0	0	0	0	0	0	0	0	0	0	0
Sf._1293	Seifhennersdorf	Lower Oligocene	Dicotyledonae fam. inc. sedis	Dicotylophyllum	Dicotylophyllum_entire	deciduous_(deciduous)	na	entire	B	na	B	AB	0.813104	4788.67	3.68021	1.81733	112.389	61.843	3893.68	1.79148	1.85761	obs	72.0463	no		0	0	0	0	0	0	0	0	0	0	0	0	0
Sf._6000:1,2,3/6325b	Seifhennersdorf	Lower Oligocene	Malvaceae	Dombeyopsis	Dombeyopsis_sp3	deciduous_(deciduous)	tree_(tree)	entire	A	A	A	AB	0.865578	7976.35	3.9018	1.30582	125.77	96.3153	6904.15	na	na		na	no		0	0	0	0	0	0	0	0	0	0	0	0	0
SuBe_836	Suletice-Berand	Lower Oligocene	Fabaceae	Leguminosae	Leguminosae_indet	evergreen_(evergreen)	shrub to small tree	entire	A or B	B	B	AB	0.956578	17.724	1.24856	5.57362	11.5616	2.07434	16.9544	0.472037	2.34397	obs	220.784	no		0	0	0	0	0	0	0	0	0	0	0	0	0
SuBe_326	Suletice-Berand	Lower Oligocene	Fabaceae	Leguminosae	Leguminosae_indet	evergreen_(evergreen)	shrub to small tree	entire	A or B	B	B	AB	1	22.7471	1.35693	2.47925	8.36098	3.37239	22.7471	0.32334	2.17703	obs	150.326	no		0	0	0	0	0	0	0	0	0	0	0	0	0
SuBe_361/362	Suletice-Berand	Lower Oligocene	Fabaceae	Leguminosae	Leguminosae_indet	na	shrub to small tree	entire	A or B	B	B	AB	1	27.2399	1.43521	1.90106	8.13827	4.28091	27.2399	na	na		na	no		0	0	0	0	0	0	0	0	0	0	0	0	0
SuBe_511	Suletice-Berand	Lower Oligocene	Ulmaceae	Zelkova	Zelkova_zelkovifolia	deciduous_(deciduous)	tree_(tree)	dentate	E or F	F	F	EF	1	29.9796	1.47683	1.97383	10.0154	5.07407	29.9796	na	na		na	no		0	0	0	0	0	0	0	0	0	0	0	0	0
SuBe_320	Suletice-Berand	Lower Oligocene	Fabaceae	Leguminosae	Leguminosae_indet	evergreen_(evergreen)	shrub to small tree	entire	E or F	E	E	EF	0.988179	32.4098	1.51068	2.31045	9.5954	4.15305	32.0267	0.448152	2.22661	obs	168.504	no		0	0	0	0	0	0	0	0	0	0	0	0	0
SuBe_382	Suletice-Berand	Lower Oligocene	Fabaceae	Leguminosae	Leguminosae_indet	na	shrub to small tree	entire	A or B	B	B	AB	0.959201	35.6615	1.5522	2.14942	9.85408	4.58454	34.2066	na	na		na	no		0	0	0	0	0	0	0	0	0	0	0	0	0
SuBe_385	Suletice-Berand	Lower Oligocene	Fabaceae	Leguminosae	Leguminosae_indet	evergreen_(evergreen)	shrub to small tree	entire	A or B	B	B	AB	0.985138	36.1253	1.55781	2.17445	10.0726	4.63226	35.5884	0.392301	2.16444	obs	146.03	no		0	0	0	0	0	0	0	0	0	0	0	0	0
SuBe_658	Suletice-Berand	Lower Oligocene	Fabaceae	Leguminosae	Leguminosae_indet	evergreen_(evergreen)	shrub to small tree	entire	K	K	K	KL	1	36.5856	1.56331	2.24794	10.2128	4.54318	36.5856	0.485509	2.23307	obs	171.029	no		0	0	0	0	0	0	0	0	0	0	0	0	0
SuBe_625	Suletice-Berand	Lower Oligocene	Fabaceae	Leguminosae	Leguminosae_indet	evergreen_(evergreen)	shrub to small tree	entire	A or B	B	B	AB	1	39.5621	1.59728	2.24894	10.3353	4.59562	39.5621	0.414905	2.16795	obs	147.215	no		0	0	0	0	0	0	0	0	0	0	0	0	0
SuBe_316	Suletice-Berand	Lower Oligocene	Fabaceae	Leguminosae	Leguminosae_indet	evergreen_(evergreen)	shrub to small tree	entire	A or B	B	B	AB	0.933662	40.6266	1.60881	2.5085	11.2689	4.49228	37.9316	0.509716	2.23183	obs	170.543	no		0	0	0	0	0	0	0	0	0	0	0	0	0
SuBe_715	Suletice-Berand	Lower Oligocene	Ulmaceae	Zelkova	Zelkova_zelkovifolia	deciduous_(deciduous)	tree_(tree)	dentate	F	F	F	EF	0.930935	40.8612	1.61131	2.85421	14.2203	4.98223	38.0391	na	na		na	no		0	0	0	0	0	0	0	0	0	0	0	0	0
SuBe_317	Suletice-Berand	Lower Oligocene	Fabaceae	Leguminosae	Leguminosae_indet	evergreen_(evergreen)	shrub to small tree	entire	A or B	B	B	AB	1	41.6958	1.62009	2.12989	10.7471	5.04586	41.6958	0.430626	2.17158	obs	148.449	no		0	0	0	0	0	0	0	0	0	0	0	0	0
SuBe_314	Suletice-Berand	Lower Oligocene	Fabaceae	Leguminosae	Leguminosae_indet	semi-deciduous	shrub to small tree	entire	A or B	B	B	AB	1	49.6906	1.69627	2.59546	12.733	4.90587	49.6906	0.279339	1.99887	obs	99.7397	no		0	0	0	0	0	0	0	0	0	0	0	0	0
SuBe_511/241	Suletice-Berand	Lower Oligocene	Ulmaceae	Zelkova	Zelkova_zelkovifolia	deciduous_(deciduous)	tree_(tree)	dentate	E or F	F	F	EF	1	50.7991	1.70586	2.21665	14.0622	6.34391	50.7991	0.286954	2.00413	obs	100.956	no		0	0	0	0	0	0	0	0	0	0	0	0	0
SuBe_835	Suletice-Berand	Lower Oligocene	Fabaceae	Leguminosae	Leguminosae_indet	na	shrub to small tree	entire	A or B	B	B	AB	1	52.3592	1.71899	2.97242	14.8849	5.00768	52.3592	na	na		na	no		0	0	0	0	0	0	0	0	0	0	0	0	0
SuBe_140	Suletice-Berand	Lower Oligocene	Fabaceae	Leguminosae	Leguminosae_indet	evergreen_(evergreen)	shrub to small tree	entire	A or B	B	B	AB	1	54.502	1.73641	1.89725	11.867	6.25483	54.502	0.459596	2.14875	obs	140.846	no		0	0	0	0	0	0	0	0	0	0	0	0	0
SuBe_383	Suletice-Berand	Lower Oligocene	Fabaceae	Leguminosae	Leguminosae_indet	semi-deciduous	shrub to small tree	entire	A or B	B	B	AB	0.955322	57.4728	1.75946	2.60272	13.3814	5.1413	54.905	0.238535	1.92233	obs	83.6247	yes	margin	0.783	1.36238	1.4261	0	0	0.783	1.36238	0	0	0	0	0	0
SuBe_600	Suletice-Berand	Lower Oligocene	Symblocaceae	Symblocos	Symblocos_deichmuelleri	evergreen_(evergreen)	shrub to small tree	dentate	F	E,F	F	EF	1	60.155	1.77927	2.11308	13.5061	6.39164	60.155	0.427637	2.10846	obs	128.369	no		0	0	0	0	0	0	0	0	0	0	0	0	0
SuBe_329/307	Suletice-Berand	Lower Oligocene	Ulmaceae	Zelkova	Zelkova_zelkovifolia	deciduous_(deciduous)	tree_(tree)	dentate	E or F	F	F	EF	1	61.5385	1.78915	2.53351	16.1691	6.38209	61.5385	na	na		na	no		0	0	0	0	0	0	0	0	0	0	0	0	0
SuBe_511	Suletice-Berand	Lower Oligocene	Ulmaceae	Zelkova	Zelkova_zelkovifolia	deciduous_(deciduous)	tree_(tree)	dentate	E or F	F	F	EF	1	66.2016	1.82087	2.58363	17.8228	6.89835	66.2016	0.379466	2.05292	obs	112.958	no		0	0	0	0	0	0	0	0	0	0	0	0	0
SuBe_151	Suletice-Berand	Lower Oligocene	Ulmaceae	Zelkova	Zelkova_zelkovifolia	deciduous_(deciduous)	tree_(tree)	dentate	E or F	F	F	EF	0.900887	67.5428	1.82958	2.34646	16.8416	7.17746	60.8485	0.423169	2.08576	obs	121.831	no		0	0	0	0	0	0	0	0	0	0	0	0	0
SuBe_559	Suletice-Berand	Lower Oligocene	Ulmaceae	Zelkova	Zelkova_zelkovifolia	deciduous_(deciduous)	tree_(tree)	dentate	E or F	F	F	EF	0.884989	68.3974	1.83504	2.27757	15.2457	6.69387	60.5309	na	na		na	no		0	0	0	0	0	0	0	0	0	0	0	0	0
SuBe_506	Suletice-Berand	Lower Oligocene	Ulmaceae	Zelkova	Zelkova_zelkovifolia	deciduous_(deciduous)	tree_(tree)	dentate	E or F	F	F	EF	0.893393	73.114	1.864	3.11491	20.8704	6.70016	65.3196	na	na		na	no		0	0	0	0	0	0	0	0	0	0	0	0	0
SuBe_866	Suletice-Berand	Lower Oligocene	Sapindaceae	Acer	Acer_cfintegrilobum	deciduous_(deciduous)	tree_(tree)	dentate	O	L	O	OP	1	77.0216	1.88661	0.805032	12.0585	14.9789	77.0216	na	na		na	no		0	0	0	0	0	0	0	0	0	0	0	0	0
SuBe_60	Suletice-Berand	Lower Oligocene	Lauraceae	Daphnogene	Daphnogene_cinnamomifolia	evergreen_(evergreen)	shrub to small tree	entire	B	C,D	B	AB	0.940017	77.5625	1.88965	4.83765	24.0852	4.97871	72.91	na	na		na	no		0	0	0	0	0	0	0	0	0	0	0	0	0
SuBe_353	Suletice-Berand	Lower Oligocene	Fabaceae	Leguminosae	Leguminosae_indet	evergreen_(evergreen)	shrub to small tree	entire	A	B	A	AB	1	83.3831	1.92108	1.74447	14.5522	8.34189	83.3831	0.61727	2.17607	obs	149.993	no		0	0	0	0	0	0	0	0	0	0	0	0	0
SuBe_847	Suletice-Berand	Lower Oligocene	Fabaceae	Leguminosae	Leguminosae_indet	semi-deciduous	shrub to small tree	entire	A	B	A	AB	1	86.5174	1.9371	3.1954	19.5495	6.11802	86.5174	0.343439	1.97542	obs	94.4964	no		0	0	0	0	0	0	0	0	0	0	0	0	0
SuBe_806	Suletice-Berand	Lower Oligocene	Ulmaceae	Zelkova	Zelkova_zelkovifolia	deciduous_(deciduous)	tree_(tree)	dentate	F	F	F	EF	0.97723	86.8109	1.93857	3.44882	24.8635	7.20928	84.8342	0.407782	2.03183	obs	107.605	no		0	0	0	0	0	0	0	0	0	0	0	0	0
SuBe_875	Suletice-Berand	Lower Oligocene	Ulmaceae	Zelkova	Zelkova_zelkovifolia	deciduous_(deciduous)	tree_(tree)	dentate	F	F	F	EF	0.958447	88.9116	1.94896	2.00179	17.1876	8.58613	85.2171	0.442837	2.05523	obs	113.561	no		0	0	0	0	0	0	0	0	0	0	0	0	0
SuBe_166	Suletice-Berand	Lower Oligocene	Rosaceae	Rosa	Rosa_lignitum	deciduous_(deciduous)	shrub, climber, scrambler	dentate	E or F	E	E	EF	1	92.1612	1.96455	3.332	21.2651	6.38209	92.1612	na	na		na	no		0	0	0	0	0	0	0	0	0	0	0	0	0
SuBe_423/850	Suletice-Berand	Lower Oligocene	Fabaceae	Leguminosae	Leguminosae_indet	semi-deciduous	shrub to small tree	entire	A or B	B	B	AB	1	95.0351	1.97788	2.09184	16.9574	8.10646	95.0351	0.465864	2.061	obs	115.08	no		0	0	0	0	0	0	0	0	0	0	0	0	0
SuBe_337	Suletice-Berand	Lower Oligocene	Fabaceae	Leguminosae	Leguminosae_indet	evergreen_(evergreen)	shrub to small tree	entire	A or B	B	B	AB	0.768359	96.5227	1.98463	1.4384	13.353	9.28322	74.1641	0.658884	2.17344	obs	149.088	no		0	0	0	0	0	0	0	0	0	0	0	0	0
SuBe_354/792	Suletice-Berand	Lower Oligocene	Fabaceae	Leguminosae	Leguminosae_indet	na	shrub to small tree	entire	A or B	B	B	AB	1	102.078	2.00893	2.09334	17.0019	8.12191	102.078	na	na		na	no		0	0	0	0	0	0	0	0	0	0	0	0	0
SuBe_136	Suletice-Berand	Lower Oligocene	Lauraceae	Laurophyllum	Laurophyllum_cfpseudoprinceps	evergreen_(evergreen)	shrub to small tree	entire	A	A	A	AB	1	104.88	2.02069	5.19616	28.4012	5.46582	104.88	0.587193	2.12144	obs	132.265	no		0	0	0	0	0	0	0	0	0	0	0	0	0
SuBe_424/110	Suletice-Berand	Lower Oligocene	Juglandaceae	Engelhardia	Engelhardia_orsbergensis	evergreen_(evergreen)	tree_(tree)	dentate	E or F	E	E	EF	0.996255	108.645	2.03601	4.64	27.6664	5.96259	108.238	na	na		na	no		0	0	0	0	0	0	0	0	0	0	0	0	0
SuBe_851	Suletice-Berand	Lower Oligocene	Fabaceae	Leguminosae	Leguminosae_indet	semi-deciduous	shrub to small tree	entire	A or B	B	B	AB	0.876459	117.078	2.06848	2.68534	20.6034	7.67255	102.614	0.385375	1.96346	obs	91.93	no		0	0	0	0	0	0	0	0	0	0	0	0	0
SuBe_723	Suletice-Berand	Lower Oligocene	Juglandaceae	Engelhardia	Engelhardia_orsbergensis	evergreen_(evergreen)	tree_(tree)	dentate	E or F	E	E	EF	0.857738	117.109	2.06859	4.3665	27.6818	6.33958	100.449	na	na		na	no		0	0	0	0	0	0	0	0	0	0	0	0	0
SuBe_433	Suletice-Berand	Lower Oligocene	Juglandaceae	Engelhardia	Engelhardia_orsbergensis	evergreen_(evergreen)	tree_(tree)	dentate	F	F	F	EF	0.916405	118.242	2.07277	4.61653	29.4888	6.38766	108.358	na	na		na	no		0	0	0	0	0	0	0	0	0	0	0	0	0
SuBe_767	Suletice-Berand	Lower Oligocene	Fabaceae	Leguminosae	Leguminosae_indet	evergreen_(evergreen)	shrub to small tree	entire	F	F	F	EF	0.945123	119.17	2.07617	1.6734	17.7719	10.6202	112.63	0.841226	2.21954	obs	165.782	no		0	0	0	0	0	0	0	0	0	0	0	0	0
SuBe_367	Suletice-Berand	Lower Oligocene	Fabaceae	Leguminosae	Leguminosae_indet	evergreen_(evergreen)	shrub to small tree	entire	A or B	B	B	AB	1	120.968	2.08267	1.73366	17.1101	9.86936	120.968	0.572248	2.08921	obs	122.805	no		0	0	0	0	0	0	0	0	0	0	0	0	0
SuBe_818/34	Suletice-Berand	Lower Oligocene	Fabaceae	Leguminosae	Leguminosae_indet	semi-deciduous	shrub to small tree	entire	B	B	B	AB	0.737025	121.363	2.08409	1.7623	16.6265	9.43456	89.4478	0.485777	2.03432	obs	108.222	no		0	0	0	0	0	0	0	0	0	0	0	0	0
SuBe_460	Suletice-Berand	Lower Oligocene	Betulaceae	Carpinus	Carpinus_grandis	deciduous_(deciduous)	tree_(tree)	dentate	F	F	F	EF	0.990306	123.512	2.09171	1.75382	17.6493	10.0633	122.315	na	na		na	no		0	0	0	0	0	0	0	0	0	0	0	0	0
SuBe_460/282	Suletice-Berand	Lower Oligocene	Fabaceae	Leguminosae	Leguminosae_indet	semi-deciduous	shrub to small tree	entire	A or B	B	B	AB	1	123.622	2.0921	2.68304	21.0329	7.83921	123.622	0.513635	2.04976	obs	112.14	no		0	0	0	0	0	0	0	0	0	0	0	0	0
SuBe_379	Suletice-Berand	Lower Oligocene	Lauraceae	Daphnogene	Daphnogene_cinnamomifolia	evergreen_(evergreen)	shrub to small tree	entire	B	C,D	B	AB	0.977182	131.622	2.11933	2.39833	21.1054	8.80005	128.619	na	na		na	no		0	0	0	0	0	0	0	0	0	0	0	0	0
SuBe_583/358	Suletice-Berand	Lower Oligocene	Fabaceae	Leguminosae	Leguminosae_indet	semi-deciduous	shrub to small tree	entire	A or B	B	B	AB	0.918079	132.776	2.12312	2.04415	19.2342	9.40935	121.899	0.37217	1.93101	obs	85.3128	yes	margin	11.756	8.854	9.64405	0	0	11.756	8.854	0	0	0	0	0	0
SuBe_78	Suletice-Berand	Lower Oligocene	Fabaceae	Leguminosae	Leguminosae_indet	evergreen_(evergreen)	shrub to small tree	entire	B	B	B	AB	0.96262	136.202	2.13418	1.19295	14.5059	12.1597	131.111	0.591212	2.08035	obs	120.324	no		0	0	0	0	0	0	0	0	0	0	0	0	0
SuBe_329	Suletice-Berand	Lower Oligocene	Fabaceae	Leguminosae	Leguminosae_indet	evergreen_(evergreen)	shrub to small tree	entire	A or B	B	B	AB	1	138.221	2.14057	3.40375	25.4265	7.47016	138.221	0.719861	2.14324	obs	139.072	no		0	0	0	0	0	0	0	0	0	0	0	0	0
SuBe_765	Suletice-Berand	Lower Oligocene	Ulmaceae	Zelkova	Zelkova_zelkovifolia	deciduous_(deciduous)	tree_(tree)	dentate	F	F	F	EF	0.972569	138.304	2.14083	2.2073	22.3457	10.1235	134.51	0.561651	2.06079	obs	115.025	no		0	0	0	0	0	0	0	0	0	0	0	0	0
SuBe_15	Suletice-Berand	Lower Oligocene	Fabaceae	Leguminosae	Leguminosae_indet	semi-deciduous	shrub to small tree	entire	A or B	B	B	AB	1	143.634	2.15726	2.21828	20.6925	9.32816	143.634	0.554424	2.05022	obs	112.26	no		0	0	0	0	0	0	0	0	0	0	0	0	0
SuBe_152	Suletice-Berand	Lower Oligocene	Fabaceae	Leguminosae	Leguminosae_indet	semi-deciduous	shrub to small tree	entire	A or B	B	B	AB	1	143.846	2.1579	1.51249	16.5629	10.9507	143.846	0.450096	1.98081	obs	95.6771	no		0	0	0	0	0	0	0	0	0	0	0	0	0
SuBe_729	Suletice-Berand	Lower Oligocene	Juglandaceae	Engelhardia	Engelhardia_orsbergensis	evergreen_(evergreen)	tree_(tree)	dentate	E or F	E	E	EF	0.817384	144.326	2.15935	5.36906	33.9137	6.3165	117.97	na	na		na	no		0	0	0	0	0	0	0	0	0	0	0	0	0
SuBe_271	Suletice-Berand	Lower Oligocene	Symblocaceae	Symblocos	Symblocos_deichmuelleri	evergreen_(evergreen)	shrub to small tree	dentate	E or F	E,F	E,F	EF	0.905176	146.457	2.16571	2.01811	20.6601	10.2373	132.57	na	na		na	no		0	0	0	0	0	0	0	0	0	0	0	0	0
SuBe_289	Suletice-Berand	Lower Oligocene	Platanaceae	Platanus	Platanus_neptuni	deciduous_(deciduous)	tree_(tree)	dentate	E or F	E	E	EF	0.88723	148.725	2.17238	4.08444	31.1871	7.6356	131.953	na	na		na	no		0	0	0	0	0	0	0	0	0	0	0	0	0
SuBe_463	Suletice-Berand	Lower Oligocene	Fabaceae	Leguminosae	Leguminosae_indet	evergreen_(evergreen)	shrub to small tree	entire	B	B	B	AB	0.997224	150.877	2.17862	1.85782	19.8716	10.6962	150.458	0.623377	2.08096	obs	120.491	no		0	0	0	0	0	0	0	0	0	0	0	0	0
SuBe_334	Suletice-Berand	Lower Oligocene	Fabaceae	Leguminosae	Leguminosae_indet	na	shrub to small tree	entire	A	B	A	AB	0.956717	154.043	2.18764	2.01189	20.0116	9.9467	147.375	na	na		na	no		0	0	0	0	0	0	0	0	0	0	0	0	0
SuBe_597	Suletice-Berand	Lower Oligocene	Juglandaceae	Engelhardia	Engelhardia_orsbergensis	evergreen_(evergreen)	tree_(tree)	dentate	E or F	E	E	EF	0.899502	161.212	2.2074	5.32267	35.8525	6.7358	145.011	na	na		na	no		0	0	0	0	0	0	0	0	0	0	0	0	0
SuBe_208	Suletice-Berand	Lower Oligocene	Lauraceae	Daphnogene	Daphnogene_cinnamomifolia	evergreen_(evergreen)	shrub to small tree	entire	D	C,D	D	CD	0.949327	166.139	2.22047	2.40785	24.1285	10.0208	157.721	na	na		na	yes	margin	2.807	1.68955	1.77973	0	0	2.807	1.68955	0	0	0	0	0	0
SuBe_834	Suletice-Berand	Lower Oligocene	Lauraceae	Laurophyllum	Laurophyllum_sp	evergreen_(evergreen)	shrub to small tree	entire	A	A,B	A	AB	0.929686	166.497	2.22141	0.688541	39.9564	58.0305	154.79	0.568303	2.03392	obs	108.124	no		0	0	0	0	0	0	0	0	0	0	0	0	0
SuBe_621	Suletice-Berand	Lower Oligocene	Fabaceae	Leguminosae	Leguminosae_indet	evergreen_(evergreen)	shrub to small tree	entire	B	B	B	AB	1	170.014	2.23049	1.67961	19.8144	11.797	170.014	0.76307	2.12823	obs	134.349	no		0	0	0	0	0	0	0	0	0	0	0	0	0
SuBe_312	Suletice-Berand	Lower Oligocene	Fabaceae	Leguminosae	Leguminosae_indet	semi-deciduous	shrub to small tree	entire	A	B	A	AB	0.984441	176.178	2.24595	2.3668	23.9905	10.1363	173.437	0.467354	1.95966	obs	91.129	no		0	0	0	0	0	0	0	0	0	0	0	0	0
SuBe_280	Suletice-Berand	Lower Oligocene	Platanaceae	Platanus	Platanus_neptuni	deciduous_(deciduous)	tree_(tree)	dentate	E or F	E	E	EF	0.965099	180.492	2.25646	5.19199	37.1662	7.15837	174.193	0.765819	2.11951	obs	131.676	no		0	0	0	0	0	0	0	0	0	0	0	0	0
SuBe_657	Suletice-Berand	Lower Oligocene	Juglandaceae	Engelhardia	Engelhardia_orsbergensis	evergreen_(evergreen)	tree_(tree)	dentate	E or F	E	E	EF	0.902554	180.611	2.25674	1.64378	23.5734	14.341	163.011	na	na		na	no		0	0	0	0	0	0	0	0	0	0	0	0	0
SuBe_686	Suletice-Berand	Lower Oligocene	Ulmaceae	Zelkova	Zelkova_zelkovifolia	deciduous_(deciduous)	tree_(tree)	dentate	F	F	F	EF	0.853133	182.766	2.2619	3.08569	32.3376	10.4799	155.924	0.529288	1.99486	obs	98.8227	no		0	0	0	0	0	0	0	0	0	0	0	0	0
SuBe_629	Suletice-Berand	Lower Oligocene	Lauraceae	Laurophyllum	Laurophyllum_sp	evergreen_(evergreen)	shrub to small tree	entire	B	A,B	B	AB	0.863784	184.965	2.26709	2.83858	31.2621	11.0133	159.77	0.747553	2.10743	obs	128.066	no		0	0	0	0	0	0	0	0	0	0	0	0	0
SuBe_291/163	Suletice-Berand	Lower Oligocene	Fabaceae	Leguminosae	Leguminosae_indet	evergreen_(evergreen)	shrub to small tree	entire	A or B	B	B	AB	0.907729	186.783	2.27134	1.68724	21.0424	12.4715	169.548	0.972589	2.19313	obs	156.001	no		0	0	0	0	0	0	0	0	0	0	0	0	0
SuBe_355	Suletice-Berand	Lower Oligocene	Fabaceae	Leguminosae	Leguminosae_indet	na	shrub to small tree	entire	B	B	B	AB	1	192.162	2.28367	2.02931	23.3458	11.5043	192.162	na	na		na	no		0	0	0	0	0	0	0	0	0	0	0	0	0
SuBe_636	Suletice-Berand	Lower Oligocene	Juglandaceae	Engelhardia	Engelhardia_orsbergensis	evergreen_(evergreen)	tree_(tree)	dentate	E or F	E	E	EF	0.914004	192.408	2.28422	4.82229	43.5802	9.03724	175.862	na	na		na	no		0	0	0	0	0	0	0	0	0	0	0	0	0
SuBe_79	Suletice-Berand	Lower Oligocene	Lauraceae	Daphnogene	Daphnogene_cinnamomifolia	evergreen_(evergreen)	shrub to small tree	entire	A	C,D	A	AB	1	192.568	2.28458	2.80973	28.7846	10.2446	192.568	0.431643	1.91852	obs	82.8942	no		0	0	0	0	0	0	0	0	0	0	0	0	0
SuBe_529	Suletice-Berand	Lower Oligocene	Lauraceae	Daphnogene	Daphnogene_cinnamomifolia	evergreen_(evergreen)	shrub to small tree	entire	C or D	C,D	C,D	CD	0.896145	192.912	2.28536	4.52394	36.3314	8.03092	172.877	na	na		na	no		0	0	0	0	0	0	0	0	0	0	0	0	0
SuBe_585	Suletice-Berand	Lower Oligocene	Fabaceae	Leguminosae	Leguminosae_indet	evergreen_(evergreen)	shrub to small tree	entire	A or B	B	B	AB	0.928858	196.457	2.29327	3.01286	28.3153	9.39815	182.48	0.708162	2.07947	obs	120.081	no		0	0	0	0	0	0	0	0	0	0	0	0	0
SuBe_526	Suletice-Berand	Lower Oligocene	Lauraceae	Daphnogene	Daphnogene_cinnamomifolia	evergreen_(evergreen)	shrub to small tree	entire	A or B	C,D	C,D	CD	1	203.735	2.30907	4.49726	40.6301	9.0344	203.735	1.29568	2.27388	obs	187.882	no		0	0	0	0	0	0	0	0	0	0	0	0	0
SuBe_402	Suletice-Berand	Lower Oligocene	Platanaceae	Platanus	Platanus_neptuni	deciduous_(deciduous)	tree_(tree)	dentate	E or F	E	E	EF	0.94557	204.414	2.31051	3.64703	36.7192	10.0682	193.288	na	na		na	no		0	0	0	0	0	0	0	0	0	0	0	0	0
SuBe_874	Suletice-Berand	Lower Oligocene	Juglandaceae	Engelhardia	Engelhardia_orsbergensis	evergreen_(evergreen)	tree_(tree)	dentate	E or F	E	E	EF	0.992988	205.365	2.31253	3.31007	40.861	12.3445	203.925	na	na		na	no		0	0	0	0	0	0	0	0	0	0	0	0	0
SuBe_737	Suletice-Berand	Lower Oligocene	Platanaceae	Platanus	Platanus_neptuni	deciduous_(deciduous)	tree_(tree)	dentate	E or F	E	E	EF	0.996727	211.406	2.32512	3.79854	36.3518	9.56995	210.714	na	na		na	no		0	0	0	0	0	0	0	0	0	0	0	0	0
SuBe_303	Suletice-Berand	Lower Oligocene	Platanaceae	Platanus	Platanus_neptuni	deciduous_(deciduous)	tree_(tree)	dentate	E	E	E	EF	0.941487	213.8	2.33001	3.11824	32.143	10.3081	201.29	na	na		na	no		0	0	0	0	0	0	0	0	0	0	0	0	0
SuBe_888	Suletice-Berand	Lower Oligocene	Platanaceae	Platanus	Platanus_neptuni	deciduous_(deciduous)	tree_(tree)	dentate	E	E	E	EF	0.957266	216.429	2.33532	3.98201	37.0688	9.30907	207.18	0.92328	2.15142	obs	141.718	no		0	0	0	0	0	0	0	0	0	0	0	0	0
SuBe_878/323	Suletice-Berand	Lower Oligocene	Fabaceae	Leguminosae	Leguminosae_indet	semi-deciduous	shrub to small tree	entire	A or B	B	B	AB	1	217.904	2.33826	2.51433	27.806	11.059	217.904	0.595253	2.00465	obs	101.078	yes	hole	0.491	0.225329	0.225329	0.491	0.225329	0	0	0	0	0	0	0	0
SuBe_516	Suletice-Berand	Lower Oligocene	Fabaceae	Leguminosae	Leguminosae_indet	semi-deciduous	shrub to small tree	entire	A or B	B	B	AB	1	224.837	2.35187	2.66687	28.0672	10.5244	224.837	0.64234	2.02472	obs	105.857	no		0	0	0	0	0	0	0	0	0	0	0	0	0
SuBe_765/779	Suletice-Berand	Lower Oligocene	Fabaceae	Leguminosae	Leguminosae_indet	semi-deciduous	shrub to small tree	entire	A	B	A	AB	0.851512	225.188	2.35254	1.65654	22.8941	13.8204	191.75	0.714445	2.05976	obs	114.752	no		0	0	0	0	0	0	0	0	0	0	0	0	0
SuBe_295	Suletice-Berand	Lower Oligocene	Lauraceae	Daphnogene	Daphnogene_cinnamomifolia	evergreen_(evergreen)	shrub to small tree	entire	B	C,D	B	AB	1	225.414	2.35298	2.8871	30.4403	10.5436	225.414	1.01347	2.1756	obs	149.831	no		0	0	0	0	0	0	0	0	0	0	0	0	0
SuBe_44	Suletice-Berand	Lower Oligocene	Lauraceae	Daphnogene	Daphnogene_cinnamomifolia	evergreen_(evergreen)	shrub to small tree	entire	A or B	C,D	C,D	CD	0.953722	226.134	2.35437	4.54179	40.7438	8.97087	215.669	na	na		na	no		0	0	0	0	0	0	0	0	0	0	0	0	0
SuBe_305	Suletice-Berand	Lower Oligocene	Platanaceae	Platanus	Platanus_neptuni	deciduous_(deciduous)	tree_(tree)	dentate	E or F	E	E	EF	0.97473	227.684	2.35733	5.43911	41.7731	7.68014	221.93	na	na		na	no		0	0	0	0	0	0	0	0	0	0	0	0	0
SuBe_105	Suletice-Berand	Lower Oligocene	Ulmaceae	Zelkova	Zelkova_zelkovifolia	deciduous_(deciduous)	tree_(tree)	dentate	F	F	F	EF	0.868182	228.572	2.35902	1.46667	23.3667	15.9317	198.442	na	na		na	no		0	0	0	0	0	0	0	0	0	0	0	0	0
SuBe_607/539	Suletice-Berand	Lower Oligocene	Juglandaceae	Engelhardia	Engelhardia_orsbergensis	evergreen_(evergreen)	tree_(tree)	dentate	E or F	E	E	EF	0.987973	231.757	2.36503	4.95555	42.5152	8.5793	228.97	na	na		na	no		0	0	0	0	0	0	0	0	0	0	0	0	0
SuBe_18	Suletice-Berand	Lower Oligocene	Platanaceae	Platanus	Platanus_neptuni	deciduous_(deciduous)	tree_(tree)	dentate	E or F	E	E	EF	0.996612	233.094	2.36753	4.98619	41.3404	8.29099	232.304	0.597387	1.99466	obs	98.7786	no		0	0	0	0	0	0	0	0	0	0	0	0	0
SuBe_123	Suletice-Berand	Lower Oligocene	Lauraceae	Laurophyllum	Laurophyllum_cfacutimontanum	evergreen_(evergreen)	shrub to small tree	entire	A	A	A	AB	0.887212	235.182	2.3714	2.87051	40.0455	13.9506	208.656	0.694052	2.04295	obs	110.394	no		0	0	0	0	0	0	0	0	0	0	0	0	0
SuBe_413	Suletice-Berand	Lower Oligocene	Juglandaceae	Engelhardia	Engelhardia_orsbergensis	evergreen_(evergreen)	tree_(tree)	entire	A or B	E	E	EF	0.810176	238.937	2.37828	5.59006	46.3197	8.28608	193.581	na	na		na	no		0	0	0	0	0	0	0	0	0	0	0	0	0
SuBe_488	Suletice-Berand	Lower Oligocene	Juglandaceae	Engelhardia	Engelhardia_orsbergensis	evergreen_(evergreen)	tree_(tree)	dentate	E or F	E	E	EF	0.966874	242.079	2.38396	4.64991	41.2842	8.87849	234.06	0.779678	2.07675	obs	119.331	no		0	0	0	0	0	0	0	0	0	0	0	0	0
SuBe_593	Suletice-Berand	Lower Oligocene	Hamamelidaceae	Matudaea	cfMatudaea_sp	evergreen_(evergreen)	tree_(tree)	entire	A or B	na	A,B	AB	0.940728	242.76	2.38518	2.01479	26.6091	13.2069	228.372	na	na		na	no		0	0	0	0	0	0	0	0	0	0	0	0	0
SuBe_133	Suletice-Berand	Lower Oligocene	Fabaceae	Leguminosae	Leguminosae_indet	semi-deciduous	shrub to small tree	entire	A	A	A	AB	1	247.209	2.39306	1.7929	23.7022	13.22	247.209	0.550433	1.95775	obs	90.7293	no		0	0	0	0	0	0	0	0	0	0	0	0	0
SuBe_329/307	Suletice-Berand	Lower Oligocene	Fabaceae	Leguminosae	Leguminosae_indet	na	shrub to small tree	entire	A or B	B	B	AB	0.99871	247.584	2.39372	2.53477	29.2253	11.5298	247.265	na	na		na	no		0	0	0	0	0	0	0	0	0	0	0	0	0
SuBe_98	Suletice-Berand	Lower Oligocene	Symblocaceae	Symblocos	Symblocos_deichmuelleri	evergreen_(evergreen)	shrub to small tree	dentate	E or F	E,F	E,F	EF	1	252.873	2.4029	1.57854	24.0184	15.2156	252.873	0.863041	2.10322	obs	126.829	no		0	0	0	0	0	0	0	0	0	0	0	0	0
SuBe_887	Suletice-Berand	Lower Oligocene	Lauraceae	Daphnogene	Daphnogene_cinnamomifolia	evergreen_(evergreen)	shrub to small tree	entire	B	C,D	B	AB	0.936128	255.249	2.40696	2.68114	34.1898	12.752	238.946	na	na		na	no		0	0	0	0	0	0	0	0	0	0	0	0	0
SuBe_632	Suletice-Berand	Lower Oligocene	Juglandaceae	Engelhardia	Engelhardia_orsbergensis	evergreen_(evergreen)	tree_(tree)	dentate	E or F	E	E	EF	0.979537	255.527	2.40744	4.15149	38.5837	9.29395	250.298	na	na		na	no		0	0	0	0	0	0	0	0	0	0	0	0	0
SuBe_507/489	Suletice-Berand	Lower Oligocene	Fabaceae	Leguminosae	Leguminosae_indet	na	shrub to small tree	entire	B	B	B	AB	1	256.933	2.40982	2.37314	28.449	11.9879	256.933	na	na		na	no		0	0	0	0	0	0	0	0	0	0	0	0	0
SuBe_86/154	Suletice-Berand	Lower Oligocene	Juglandaceae	Engelhardia	Engelhardia_orsbergensis	evergreen_(evergreen)	tree_(tree)	dentate	E or F	E	E	EF	0.957484	262.51	2.41915	5.30373	49.7777	9.38542	251.349	0.611751	1.98283	obs	96.1235	yes	hole/margin	8.779	3.34425	3.49275	0.991	0.377509	7.788	2.96674	0	0	0	0	0	0
SuBe_140	Suletice-Berand	Lower Oligocene	Fabaceae	Leguminosae	Leguminosae_indet	semi-deciduous	shrub to small tree	entire	B	B	B	AB	0.965671	262.775	2.41958	1.51596	22.7069	14.9785	253.754	0.634727	1.9949	obs	98.8316	no		0	0	0	0	0	0	0	0	0	0	0	0	0
SuBe_207	Suletice-Berand	Lower Oligocene	Lauraceae	Daphnogene	Daphnogene_cinnamomifolia	evergreen_(evergreen)	shrub to small tree	entire	B	C,D	B	AB	0.907286	265.194	2.42356	3.80274	39.3214	10.3403	240.607	0.799754	2.07006	obs	117.505	no		0	0	0	0	0	0	0	0	0	0	0	0	0
SuBe_351	Suletice-Berand	Lower Oligocene	Lauraceae	Daphnogene	Daphnogene_cinnamomifolia	evergreen_(evergreen)	shrub to small tree	entire	E or F	E	E	EF	0.861602	266.904	2.42635	3.86982	40.0745	10.3557	229.965	na	na		na	no		0	0	0	0	0	0	0	0	0	0	0	0	0
SuBe_445	Suletice-Berand	Lower Oligocene	Cornaceae	Cornus	Cornus_studeri	deciduous_(deciduous)	shrub to small tree	entire	B	B	B	AB	0.825284	267.298	2.427	1.79229	26.1854	14.61	220.597	na	na		na	no		0	0	0	0	0	0	0	0	0	0	0	0	0
SuBe_64	Suletice-Berand	Lower Oligocene	Juglandaceae	Engelhardia	Engelhardia_orsbergensis	evergreen_(evergreen)	tree_(tree)	dentate	E or F	E	E	EF	0.954657	273.804	2.43744	3.83568	39.8069	10.3781	261.389	na	na		na	no		0	0	0	0	0	0	0	0	0	0	0	0	0
SuBe_149	Suletice-Berand	Lower Oligocene	Fabaceae	Leguminosae	Leguminosae_indet	deciduous_(deciduous)	shrub to small tree	entire	A or B	B	B	AB	0.905758	279.643	2.4466	1.61842	24.2622	14.9912	253.289	0.46162	1.87891	obs	75.6677	no		0	0	0	0	0	0	0	0	0	0	0	0	0
SuBe_293	Suletice-Berand	Lower Oligocene	Lauraceae	Daphnogene	Daphnogene_cinnamomifolia	evergreen_(evergreen)	shrub to small tree	entire	A	C,D	A	AB	0.902492	287.28	2.45831	6.42548	53.1365	8.26966	259.268	na	na		na	no		0	0	0	0	0	0	0	0	0	0	0	0	0
SuBe_340/694	Suletice-Berand	Lower Oligocene	Fabaceae	Leguminosae	Leguminosae_indet	semi-deciduous	shrub to small tree	entire	A or B	B	B	AB	0.870118	287.927	2.45928	2.81593	33.2912	11.8225	250.53	0.646554	1.98586	obs	96.7957	no		0	0	0	0	0	0	0	0	0	0	0	0	0
SuBe_871	Suletice-Berand	Lower Oligocene	Fabaceae	Leguminosae	Leguminosae_indet	semi-deciduous	shrub to small tree	entire	B	B	B	AB	0.948951	292.765	2.46652	2.66786	33.323	12.4906	277.82	0.828383	2.06532	obs	116.23	no		0	0	0	0	0	0	0	0	0	0	0	0	0
SuBe_658	Suletice-Berand	Lower Oligocene	Lauraceae	Laurophyllum	Laurophyllum_sp	evergreen_(evergreen)	shrub to small tree	entire	A	A,B	A	AB	0.957404	294.704	2.46939	2.46879	32.2518	13.0638	282.15	1.20021	2.18725	obs	153.903	no		0	0	0	0	0	0	0	0	0	0	0	0	0
SuBe_723	Suletice-Berand	Lower Oligocene	Juglandaceae	Engelhardia	Engelhardia_orsbergensis	evergreen_(evergreen)	tree_(tree)	dentate	E or F	E	E	EF	0.907581	296.288	2.47171	4.97844	46.1928	9.27856	268.905	na	na		na	no		0	0	0	0	0	0	0	0	0	0	0	0	0
SuBe_290/256	Suletice-Berand	Lower Oligocene	Symblocaceae	Symblocos	Symblocos_deichmuelleri	evergreen_(evergreen)	shrub to small tree	dentate	F	E,F	F	EF	0.97611	299.098	2.47581	2.10714	30.633	14.5377	291.953	na	na		na	no		0	0	0	0	0	0	0	0	0	0	0	0	0
SuBe_171	Suletice-Berand	Lower Oligocene	Symblocaceae	Symblocos	Symblocos_deichmuelleri	evergreen_(evergreen)	shrub to small tree	dentate	F	E,F	F	EF	1	299.452	2.47633	2.41147	32.6181	13.5263	299.452	na	na		na	no		0	0	0	0	0	0	0	0	0	0	0	0	0
SuBe_11	Suletice-Berand	Lower Oligocene	Fabaceae	Leguminosae	Leguminosae_indet	na	shrub to small tree	entire	B	B	B	AB	0.892882	300.588	2.47797	2.399	32.6057	13.5914	268.389	na	na		na	no		0	0	0	0	0	0	0	0	0	0	0	0	0
SuBe_299/875	Suletice-Berand	Lower Oligocene	Lauraceae	Daphnogene	Daphnogene_cinnamomifolia	evergreen_(evergreen)	shrub to small tree	entire	B	C,D	B	AB	0.900821	300.714	2.47815	6.21978	54.8134	8.81276	270.889	na	na		na	no		0	0	0	0	0	0	0	0	0	0	0	0	0
SuBe_320	Suletice-Berand	Lower Oligocene	Juglandaceae	Engelhardia	Engelhardia_orsbergensis	evergreen_(evergreen)	tree_(tree)	dentate	A or B	B	B	AB	0.980345	302.342	2.4805	4.87986	47.343	9.70171	296.4	na	na		na	no		0	0	0	0	0	0	0	0	0	0	0	0	0
SuBe_875	Suletice-Berand	Lower Oligocene	Ulmaceae	Zelkova	Zelkova_zelkovifolia	deciduous_(deciduous)	tree_(tree)	dentate	F	F	F	EF	0.986477	304.194	2.48315	2.96152	40.0438	13.5214	300.081	0.555451	1.92635	obs	84.4006	no		0	0	0	0	0	0	0	0	0	0	0	0	0
SuBe_868	Suletice-Berand	Lower Oligocene	Symblocaceae	Symblocos	Symblocos_deichmuelleri	evergreen_(evergreen)	shrub to small tree	dentate	E or F	E,F	E,F	EF	1	304.226	2.4832	1.49224	25.8892	17.3492	304.226	1.09274	2.15085	obs	141.53	no		0	0	0	0	0	0	0	0	0	0	0	0	0
SuBe_141	Suletice-Berand	Lower Oligocene	Juglandaceae	Engelhardia	Engelhardia_orsbergensis	evergreen_(evergreen)	tree_(tree)	dentate	E or F	E	E	EF	0.969615	304.729	2.48391	5.80759	54.5436	9.39179	295.469	na	na		na	no		0	0	0	0	0	0	0	0	0	0	0	0	0
SuBe_720	Suletice-Berand	Lower Oligocene	Juglandaceae	Engelhardia	Engelhardia_orsbergensis	evergreen_(evergreen)	tree_(tree)	dentate	E or F	E	E	EF	1	312.055	2.49423	3.94338	42.8691	10.8711	312.055	0.661856	1.98027	obs	95.558	no		0	0	0	0	0	0	0	0	0	0	0	0	0
SuBe_585	Suletice-Berand	Lower Oligocene	Fabaceae	Leguminosae	Leguminosae_indet	semi-deciduous	shrub to small tree	entire	A or B	B	B	AB	0.949982	315.125	2.49848	2.36288	32.5658	13.7823	299.363	0.760467	2.02473	obs	105.858	no		0	0	0	0	0	0	0	0	0	0	0	0	0
SuBe_566	Suletice-Berand	Lower Oligocene	Juglandaceae	Engelhardia	Engelhardia_orsbergensis	evergreen_(evergreen)	tree_(tree)	dentate	E or F	E	E	EF	0.933474	319.583	2.50458	5.43602	52.9478	9.74018	298.322	na	na		na	no		0	0	0	0	0	0	0	0	0	0	0	0	0
SuBe_699	Suletice-Berand	Lower Oligocene	Juglandaceae	Engelhardia	Engelhardia_orsbergensis	evergreen_(evergreen)	tree_(tree)	dentate	E or F	E	E	EF	0.955299	321.211	2.50679	5.93251	55.4559	9.3478	306.852	na	na		na	yes	hole	5.636	1.75461	1.83671	5.636	1.75461	0	0	0	0	0	0	0	0
SuBe_202	Suletice-Berand	Lower Oligocene	Lauraceae	Daphnogene	Daphnogene_cinnamomifolia	evergreen_(evergreen)	shrub to small tree	entire	A or B	C,D	C,D	CD	0.984205	322.808	2.50894	2.2605	31.1371	13.7744	317.709	1.20253	2.17278	obs	148.86	no		0	0	0	0	0	0	0	0	0	0	0	0	0
SuBe_659_2	Suletice-Berand	Lower Oligocene	Lauraceae	Daphnogene	Daphnogene_cinnamomifolia	evergreen_(evergreen)	shrub to small tree	entire	A	C,D	A	AB	0.763027	324.695	2.51147	5.15978	50.9321	9.87097	247.751	na	na		na	no		0	0	0	0	0	0	0	0	0	0	0	0	0
SuBe_386/651	Suletice-Berand	Lower Oligocene	Lauraceae	Daphnogene	Daphnogene_cinnamomifolia	evergreen_(evergreen)	shrub to small tree	entire	B	C,D	B	AB	0.996486	325.189	2.51214	4.09524	47.0052	11.478	324.046	0.829329	2.04827	obs	111.756	no		0	0	0	0	0	0	0	0	0	0	0	0	0
SuBe_580	Suletice-Berand	Lower Oligocene	Juglandaceae	Engelhardia	Engelhardia_orsbergensis	evergreen_(evergreen)	tree_(tree)	dentate	E	E	E	EF	0.986535	336.702	2.52725	4.7942	52.1553	10.8788	332.169	0.490769	1.86842	obs	73.8622	no		0	0	0	0	0	0	0	0	0	0	0	0	0
SuBe_229/38	Suletice-Berand	Lower Oligocene	Lauraceae	Laurophyllum	Laurophyllum_cfpseudoprinceps	evergreen_(evergreen)	shrub to small tree	entire	A	A	A	AB	0.860908	338.023	2.52895	5.48246	51.4552	9.38542	291.006	na	na		na	no		0	0	0	0	0	0	0	0	0	0	0	0	0
SuBe_491/755	Suletice-Berand	Lower Oligocene	Juglandaceae	Engelhardia	Engelhardia_orsbergensis	evergreen_(evergreen)	tree_(tree)	dentate	E or F	E	E	EF	0.924408	341.056	2.53283	4.58687	54.8404	11.956	315.275	na	na		na	yes	margin	17.235	5.05342	5.46665	0	0	17.235	5.05342	0	0	0	0	0	0
SuBe_720	Suletice-Berand	Lower Oligocene	Juglandaceae	Engelhardia	Engelhardia_orsbergensis	evergreen_(evergreen)	tree_(tree)	dentate	E or F	E	E	EF	0.96725	344.269	2.5369	4.89861	51.6706	10.548	332.994	na	na		na	no		0	0	0	0	0	0	0	0	0	0	0	0	0
SuBe_854	Suletice-Berand	Lower Oligocene	Platanaceae	Platanus	Platanus_neptuni	deciduous_(deciduous)	tree_(tree)	dentate	E or F	E	E	EF	0.990177	353.624	2.54854	4.59446	49.9326	10.868	350.15	na	na		na	no		0	0	0	0	0	0	0	0	0	0	0	0	0
SuBe_93	Suletice-Berand	Lower Oligocene	Lauraceae	Laurophyllum	Laurophyllum_sp	evergreen_(evergreen)	shrub to small tree	entire	A	A,B	A	AB	0.88486	353.82	2.54878	5.38686	58.0691	10.7798	313.081	na	na		na	no		0	0	0	0	0	0	0	0	0	0	0	0	0
SuBe_277	Suletice-Berand	Lower Oligocene	Elaeocarpaceae	Sloanea	Sloanea_artocarpites	evergreen_(evergreen)	tree_(tree)	dentate	E or F	F	F	EF	0.888625	354.322	2.5494	2.65379	39.0069	14.6985	314.859	na	na		na	no		0	0	0	0	0	0	0	0	0	0	0	0	0
SuBe_573	Suletice-Berand	Lower Oligocene	Juglandaceae	Engelhardia	Engelhardia_orsbergensis	evergreen_(evergreen)	tree_(tree)	dentate	E	E	E	EF	0.933562	354.606	2.54975	4.61756	50.1627	10.8635	331.046	na	na		na	no		0	0	0	0	0	0	0	0	0	0	0	0	0
SuBe_575/854	Suletice-Berand	Lower Oligocene	Lauraceae	Daphnogene	Daphnogene_cinnamomifolia	evergreen_(evergreen)	shrub to small tree	entire	C	C,D	C	CD	0.957183	355.731	2.55112	4.89348	54.3538	11.1074	340.5	na	na		na	no		0	0	0	0	0	0	0	0	0	0	0	0	0
SuBe_480/693	Suletice-Berand	Lower Oligocene	Fabaceae	Leguminosae	Leguminosae_indet	semi-deciduous	shrub to small tree	entire	A or B	B	B	AB	0.943796	356.012	2.55146	2.60401	35.8892	13.7823	336.003	0.761712	2.00503	obs	101.165	no		0	0	0	0	0	0	0	0	0	0	0	0	0
SuBe_257/565	Suletice-Berand	Lower Oligocene	Juglandaceae	Engelhardia	Engelhardia_orsbergensis	evergreen_(evergreen)	tree_(tree)	dentate	E or F	E	E	EF	0.797426	356.385	2.55192	3.59273	44.1155	12.2791	284.191	na	na		na	no		0	0	0	0	0	0	0	0	0	0	0	0	0
SuBe_742	Suletice-Berand	Lower Oligocene	Juglandaceae	Engelhardia	Engelhardia_orsbergensis	evergreen_(evergreen)	tree_(tree)	dentate	E or F	E	E	EF	0.857822	356.393	2.55193	5.30602	53.5594	10.0941	305.722	0.904079	2.0617	obs	115.267	no		0	0	0	0	0	0	0	0	0	0	0	0	0
SuBe_190	Suletice-Berand	Lower Oligocene	Symblocaceae	Symblocos	Symblocos_deichmuelleri	evergreen_(evergreen)	shrub to small tree	dentate	F	E,F	F	EF	0.982396	357.347	2.55309	2.07624	33.8582	16.3074	351.056	na	na		na	no		0	0	0	0	0	0	0	0	0	0	0	0	0
SuBe_165	Suletice-Berand	Lower Oligocene	Juglandaceae	Engelhardia	Engelhardia_orsbergensis	evergreen_(evergreen)	tree_(tree)	dentate	E or F	E	E	EF	1	359.984	2.55628	5.31115	54.843	10.326	359.984	na	na		na	no		0	0	0	0	0	0	0	0	0	0	0	0	0
SuBe_657	Suletice-Berand	Lower Oligocene	Juglandaceae	Engelhardia	Engelhardia_orsbergensis	evergreen_(evergreen)	tree_(tree)	dentate	E or F	E	E	EF	0.806106	361.306	2.55788	5.17844	53.0286	10.2403	291.251	na	na		na	no		0	0	0	0	0	0	0	0	0	0	0	0	0
SuBe_684	Suletice-Berand	Lower Oligocene	Ulmaceae	Zelkova	Zelkova_zelkovifolia	deciduous_(deciduous)	tree_(tree)	dentate	F	F	F	EF	0.939599	362.378	2.55916	2.1396	36.9219	17.2565	340.49	0.881151	2.05042	obs	112.31	yes	hole	21.594	5.95897	6.34204	21.594	5.95897	0	0	0	0	0	0	0	0
SuBe_348	Suletice-Berand	Lower Oligocene	Fabaceae	Leguminosae	Leguminosae_indet	deciduous_(deciduous)	shrub to small tree	entire	A or B	B	B	AB	0.872642	364.439	2.56162	3.44639	41.9947	12.1851	318.025	0.547846	1.89179	obs	77.9461	no		0	0	0	0	0	0	0	0	0	0	0	0	0
SuBe_105	Suletice-Berand	Lower Oligocene	Fabaceae	Leguminosae	Leguminosae_indet	deciduous_(deciduous)	shrub to small tree	entire	A or B	B	B	AB	0.858318	366.608	2.5642	2.00523	32.4195	16.1675	314.666	0.558122	1.89698	obs	78.8816	no		0	0	0	0	0	0	0	0	0	0	0	0	0
SuBe_726	Suletice-Berand	Lower Oligocene	Juglandaceae	Engelhardia	Engelhardia_orsbergensis	evergreen_(evergreen)	tree_(tree)	dentate	E or F	E	E	EF	1	369.87	2.56805	4.11237	47.3006	11.502	369.87	na	na		na	no		0	0	0	0	0	0	0	0	0	0	0	0	0
SuBe_624	Suletice-Berand	Lower Oligocene	Ulmaceae	Zelkova	Zelkova_zelkovifolia	deciduous_(deciduous)	tree_(tree)	dentate	F	F	F	EF	0.829923	372.563	2.5712	2.55961	41.0591	16.0411	309.199	na	na		na	no		0	0	0	0	0	0	0	0	0	0	0	0	0
SuBe_522	Suletice-Berand	Lower Oligocene	Ulmaceae	Zelkova	Zelkova_zelkovifolia	deciduous_(deciduous)	tree_(tree)	dentate	F	F	F	EF	0.844607	374.866	2.57388	1.58006	32.2933	20.438	316.614	0.681227	1.95941	obs	91.0783	no		0	0	0	0	0	0	0	0	0	0	0	0	0
SuBe_573	Suletice-Berand	Lower Oligocene	Juglandaceae	Engelhardia	Engelhardia_orsbergensis	evergreen_(evergreen)	tree_(tree)	dentate	E or F	E	E	EF	0.968073	376.824	2.57614	4.94046	54.4669	11.0247	364.793	na	na		na	no		0	0	0	0	0	0	0	0	0	0	0	0	0
SuBe_702	Suletice-Berand	Lower Oligocene	Juglandaceae	Engelhardia	Engelhardia_orsbergensis	evergreen_(evergreen)	tree_(tree)	dentate	E	E	E	EF	0.972622	380.395	2.58023	4.06639	49.2433	12.1098	369.981	na	na		na	no		0	0	0	0	0	0	0	0	0	0	0	0	0
SuBe_488	Suletice-Berand	Lower Oligocene	Juglandaceae	Engelhardia	Engelhardia_orsbergensis	evergreen_(evergreen)	tree_(tree)	dentate	E or F	E	E	EF	0.945418	381.305	2.58127	4.81749	53.6133	11.1289	360.492	0.919201	2.056	obs	113.763	yes	hole	3.872	1.01546	1.07409	3.872	1.01546	0	0	0	0	0	0	0	0
SuBe_3	Suletice-Berand	Lower Oligocene	Lauraceae	Laurophyllum	Laurophyllum_sp	evergreen_(evergreen)	shrub to small tree	entire	B	A,B	B	AB	0.940489	381.542	2.58154	2.97175	41.6381	14.0113	358.836	na	na		na	no		0	0	0	0	0	0	0	0	0	0	0	0	0
SuBe_604	Suletice-Berand	Lower Oligocene	Lauraceae	Laurophyllum	Laurophyllum_cfpseudoprinceps	evergreen_(evergreen)	shrub to small tree	entire	A or B	A	A	AB	0.930774	381.909	2.58196	4.82437	56.9062	11.7956	355.471	na	na		na	no		0	0	0	0	0	0	0	0	0	0	0	0	0
SuBe_848	Suletice-Berand	Lower Oligocene	Juglandaceae	Engelhardia	Engelhardia_orsbergensis	evergreen_(evergreen)	tree_(tree)	dentate	E or F	E	E	EF	0.900254	382.221	2.58231	4.78166	53.7479	11.2404	344.096	na	na		na	no		0	0	0	0	0	0	0	0	0	0	0	0	0
SuBe_1	Suletice-Berand	Lower Oligocene	Juglandaceae	Engelhardia	Engelhardia_orsbergensis	evergreen_(evergreen)	tree_(tree)	dentate	F	F	F	EF	0.990146	385.186	2.58567	3.75812	47.1085	12.5351	381.39	na	na		na	no		0	0	0	0	0	0	0	0	0	0	0	0	0
SuBe_145	Suletice-Berand	Lower Oligocene	Lauraceae	Laurophyllum	Laurophyllum_cfmedimontanum	evergreen_(evergreen)	shrub to small tree	entire	A	A	A	AB	0.85964	389.779	2.59082	3.72075	66.3866	17.8423	335.069	na	na		na	no		0	0	0	0	0	0	0	0	0	0	0	0	0
SuBe_903	Suletice-Berand	Lower Oligocene	Juglandaceae	Engelhardia	Engelhardia_orsbergensis	evergreen_(evergreen)	tree_(tree)	dentate	E or F	E	E	EF	0.915951	389.981	2.59104	1.80344	41.9997	23.2887	357.204	na	na		na	no		0	0	0	0	0	0	0	0	0	0	0	0	0
SuBe_62	Suletice-Berand	Lower Oligocene	Lauraceae	Daphnogene	Daphnogene_cinnamomifolia	evergreen_(evergreen)	shrub to small tree	entire	A	C,D	A	AB	0.944768	392.189	2.5935	4.22004	52.284	12.3895	370.528	na	na		na	no		0	0	0	0	0	0	0	0	0	0	0	0	0
SuBe_641	Suletice-Berand	Lower Oligocene	Juglandaceae	Engelhardia	Engelhardia_orsbergensis	evergreen_(evergreen)	tree_(tree)	dentate	E or F	E	E	EF	0.943686	393.462	2.5949	5.07059	54.9281	10.8327	371.304	0.823797	2.01443	obs	103.379	no		0	0	0	0	0	0	0	0	0	0	0	0	0
SuBe_338	Suletice-Berand	Lower Oligocene	Betulaceae	Carpinus	Carpinus_grandis	deciduous_(deciduous)	tree_(tree)	dentate	F	F	F	EF	0.993125	396.003	2.5977	2.28134	36.6834	16.0798	393.28	na	na		na	no		0	0	0	0	0	0	0	0	0	0	0	0	0
SuBe_141	Suletice-Berand	Lower Oligocene	Lauraceae	Laurophyllum	Laurophyllum_cfacutimontanum	evergreen_(evergreen)	shrub to small tree	entire	A	A	A	AB	0.891149	400.245	2.60233	6.76297	64.0543	9.47132	356.678	na	na		na	no		0	0	0	0	0	0	0	0	0	0	0	0	0
SuBe_53	Suletice-Berand	Lower Oligocene	Lauraceae	Daphnogene	Daphnogene_cinnamomifolia	evergreen_(evergreen)	shrub to small tree	entire	A	C,D	A	AB	0.732504	404.352	2.60676	1.73504	30.3284	17.48	296.19	na	na		na	no		0	0	0	0	0	0	0	0	0	0	0	0	0
SuBe_846/319	Suletice-Berand	Lower Oligocene	Juglandaceae	Engelhardia	Engelhardia_orsbergensis	evergreen_(evergreen)	tree_(tree)	dentate	E or F	E	E	EF	0.849404	405.452	2.60794	3.01168	43.6538	14.4949	344.392	na	na		na	yes	hole	0.955	0.23554	0.2773	0.955	0.23554	0	0	0	0	0	0	0	0
SuBe_831	Suletice-Berand	Lower Oligocene	Lauraceae	Daphnogene	Daphnogene_cinnamomifolia	evergreen_(evergreen)	shrub to small tree	entire	D	C,D	D	CD	0.707006	407.183	2.60979	5.14673	59.6703	11.5938	287.881	0.46433	1.81852	obs	65.844	yes	margin	5.148	1.2643	1.78824	0	0	5.148	1.2643	0	0	0	0	0	0
SuBe_20/719	Suletice-Berand	Lower Oligocene	Ulmaceae	Zelkova	Zelkova_zelkovifolia	deciduous_(deciduous)	tree_(tree)	dentate	F	F	F	EF	0.996648	408.16	2.61083	2.09227	40.9777	19.5853	406.792	na	na		na	yes	skeleton	4.325	1.05963	1.0632	0	0	0	0	4.325	1.05963	0	0	0	0
SuBe_886	Suletice-Berand	Lower Oligocene	Juglandaceae	Engelhardia	Engelhardia_orsbergensis	evergreen_(evergreen)	tree_(tree)	dentate	E or F	E	E	EF	0.930022	408.449	2.61114	4.37436	52.5016	12.0021	379.866	na	na		na	no		0	0	0	0	0	0	0	0	0	0	0	0	0
SuBe_678/718	Suletice-Berand	Lower Oligocene	Platanaceae	Platanus	Platanus_neptuni	deciduous_(deciduous)	tree_(tree)	dentate	E or F	E	E	EF	0.824284	409.259	2.612	2.85648	41.5589	14.549	337.346	na	na		na	no		0	0	0	0	0	0	0	0	0	0	0	0	0
SuBe_388/602	Suletice-Berand	Lower Oligocene	Lauraceae	Daphnogene	Daphnogene_cinnamomifolia	evergreen_(evergreen)	shrub to small tree	entire	B	C,D	B	AB	0.966536	409.601	2.61236	5.51769	65.4145	11.8554	395.894	na	na		na	no		0	0	0	0	0	0	0	0	0	0	0	0	0
SuBe_443	Suletice-Berand	Lower Oligocene	Lauraceae	Laurophyllum	Laurophyllum_cfacutimontanum	evergreen_(evergreen)	shrub to small tree	entire	A	A	A	AB	0.977117	414.097	2.6171	4.54959	52.0794	11.447	404.621	1.12207	2.10848	obs	128.376	no		0	0	0	0	0	0	0	0	0	0	0	0	0
SuBe_469/512	Suletice-Berand	Lower Oligocene	Ulmaceae	Zelkova	Zelkova_zelkovifolia	deciduous_(deciduous)	tree_(tree)	dentate	F	F	F	EF	0.979973	414.329	2.61735	2.33406	42.5351	18.2236	406.031	0.744389	1.97223	obs	93.8057	no		0	0	0	0	0	0	0	0	0	0	0	0	0
SuBe_14	Suletice-Berand	Lower Oligocene	Fabaceae	Leguminosae	Leguminosae_indet	semi-deciduous	shrub to small tree	entire	B	B	B	AB	0.769466	419.71	2.62295	3.40054	45.2188	13.2976	322.953	0.689565	1.9447	obs	88.045	no		0	0	0	0	0	0	0	0	0	0	0	0	0
SuBe_666/847	Suletice-Berand	Lower Oligocene	Juglandaceae	Engelhardia	Engelhardia_orsbergensis	evergreen_(evergreen)	tree_(tree)	dentate	E	E	E	EF	0.982549	423.388	2.62674	4.34627	54.2711	12.4868	415.999	na	na		na	no		0	0	0	0	0	0	0	0	0	0	0	0	0
SuBe_467	Suletice-Berand	Lower Oligocene	Ulmaceae	Zelkova	Zelkova_zelkovifolia	deciduous_(deciduous)	tree_(tree)	dentate	F	F	F	EF	1	423.45	2.6268	1.81081	36.6636	20.2471	423.45	0.555558	1.87153	obs	74.3934	no		0	0	0	0	0	0	0	0	0	0	0	0	0
SuBe_838	Suletice-Berand	Lower Oligocene	Juglandaceae	Engelhardia	Engelhardia_orsbergensis	evergreen_(evergreen)	tree_(tree)	dentate	D	C,D	D	CD	0.814535	425.593	2.62899	5.18812	56.4407	10.8788	346.66	na	na		na	no		0	0	0	0	0	0	0	0	0	0	0	0	0
SuBe_391	Suletice-Berand	Lower Oligocene	Platanaceae	Platanus	Platanus_neptuni	deciduous_(deciduous)	tree_(tree)	dentate	F	E	F	EF	0.832604	426.243	2.62966	3.06191	45.4148	14.8321	354.892	na	na		na	yes	mining	114.699	26.9093	32.3194	0	0	0	0	0	0	0	0	114.699	26.9093
SuBe_587	Suletice-Berand	Lower Oligocene	Fabaceae	Leguminosae	Leguminosae_indet	semi-deciduous	shrub to small tree	entire	B	B	B	AB	0.903984	429.31	2.63277	2.14538	34.2361	15.958	388.09	0.720498	1.95551	obs	90.2637	no		0	0	0	0	0	0	0	0	0	0	0	0	0
SuBe_328	Suletice-Berand	Lower Oligocene	Fabaceae	Leguminosae	Leguminosae_indet	deciduous_(deciduous)	shrub to small tree	entire	A or B	B	B	AB	0.979807	431.807	2.63529	1.85837	32.329	17.3964	423.088	0.607848	1.89814	obs	79.0931	no		0	0	0	0	0	0	0	0	0	0	0	0	0
SuBe_85	Suletice-Berand	Lower Oligocene	Juglandaceae	Engelhardia	Engelhardia_orsbergensis	evergreen_(evergreen)	tree_(tree)	dentate	E or F	E	E	EF	0.802813	435.627	2.63911	5.51295	58.9565	10.6942	349.727	na	na		na	yes	surface	5.055	1.1604	1.44541	0	0	0	0	0	0	5.055	1.1604	0	0
SuBe_903/743	Suletice-Berand	Lower Oligocene	Fabaceae	Leguminosae	Leguminosae_indet	semi-deciduous	shrub to small tree	entire	A	B	A	AB	0.978073	436.675	2.64016	1.31759	28.9326	21.9587	427.1	0.889026	2.02243	obs	105.3	no		0	0	0	0	0	0	0	0	0	0	0	0	0
SuBe_2/616	Suletice-Berand	Lower Oligocene	Juglandaceae	Engelhardia	Engelhardia_orsbergensis	evergreen_(evergreen)	tree_(tree)	dentate	E	E	E	EF	0.970397	437.751	2.64123	5.0061	57.4642	11.4788	424.793	na	na		na	yes	hole	2.989	0.682808	0.703638	2.989	0.682808	0	0	0	0	0	0	0	0
SuBe_267	Suletice-Berand	Lower Oligocene	Fabaceae	Leguminosae	Leguminosae_indet	deciduous_(deciduous)	shrub to small tree	entire	B	B	B	AB	0.803509	439.531	2.64299	2.79517	40.1601	14.3677	353.167	0.552446	1.86349	obs	73.0277	no		0	0	0	0	0	0	0	0	0	0	0	0	0
SuBe_593	Suletice-Berand	Lower Oligocene	Juglandaceae	Engelhardia	Engelhardia_orsbergensis	evergreen_(evergreen)	tree_(tree)	dentate	E or F	E	E	EF	0.875543	440.855	2.6443	4.63985	55.9022	12.0483	385.987	na	na		na	no		0	0	0	0	0	0	0	0	0	0	0	0	0
SuBe_141/872	Suletice-Berand	Lower Oligocene	Fabaceae	Leguminosae	Leguminosae_indet	deciduous_(deciduous)	shrub to small tree	entire	A or B	B	B	AB	0.978279	443.217	2.64662	2.10621	37.0963	17.6128	433.59	0.484548	1.81859	obs	65.8552	no		0	0	0	0	0	0	0	0	0	0	0	0	0
SuBe_470	Suletice-Berand	Lower Oligocene	Juglandaceae	Engelhardia	Engelhardia_orsbergensis	evergreen_(evergreen)	tree_(tree)	dentate	E or F	E	E	EF	0.868086	445.339	2.64869	4.57961	63.9497	13.964	386.592	na	na		na	no		0	0	0	0	0	0	0	0	0	0	0	0	0
SuBe_128	Suletice-Berand	Lower Oligocene	Lauraceae	Laurophyllum	Laurophyllum_cfacutimontanum	evergreen_(evergreen)	shrub to small tree	entire	A	A	A	AB	0.969668	446.232	2.64956	5.13728	66.7499	12.9932	432.697	na	na		na	no		0	0	0	0	0	0	0	0	0	0	0	0	0
SuBe_747	Suletice-Berand	Lower Oligocene	Juglandaceae	Engelhardia	Engelhardia_orsbergensis	evergreen_(evergreen)	tree_(tree)	dentate	E or F	E	E	EF	0.848298	449.166	2.65241	5.50407	62.5033	11.3558	381.026	0.861759	2.00742	obs	101.722	no		0	0	0	0	0	0	0	0	0	0	0	0	0
SuBe_40	Suletice-Berand	Lower Oligocene	Juglandaceae	Engelhardia	Engelhardia_orsbergensis	evergreen_(evergreen)	tree_(tree)	dentate	E or F	E	E	EF	0.898038	455.333	2.65833	5.04607	61.2623	12.1406	408.906	na	na		na	no		0	0	0	0	0	0	0	0	0	0	0	0	0
SuBe_903	Suletice-Berand	Lower Oligocene	Symblocaceae	Symblocos	Symblocos_deichmuelleri	evergreen_(evergreen)	shrub to small tree	dentate	P	P	P	OP	1	456.71	2.65964	1.96393	37.1241	18.903	456.71	1.08563	2.08128	obs	120.58	no		0	0	0	0	0	0	0	0	0	0	0	0	0
SuBe_201	Suletice-Berand	Lower Oligocene	Lauraceae	Laurophyllum	Laurophyllum_cfmedimontanum	evergreen_(evergreen)	shrub to small tree	entire	A	A	A	AB	0.913017	459.011	2.66182	4.9129	62.4725	12.716	419.085	na	na		na	no		0	0	0	0	0	0	0	0	0	0	0	0	0
SuBe_422	Suletice-Berand	Lower Oligocene	Platanaceae	Platanus	Platanus_neptuni	deciduous_(deciduous)	tree_(tree)	dentate	E or F	E	E	EF	0.979476	463.234	2.6658	2.99956	47.6201	15.8757	453.726	0.458032	1.79259	obs	62.0281	no		0	0	0	0	0	0	0	0	0	0	0	0	0
SuBe_723	Suletice-Berand	Lower Oligocene	Juglandaceae	Engelhardia	Engelhardia_orsbergensis	evergreen_(evergreen)	tree_(tree)	dentate	E or F	E	E	EF	0.801196	465.003	2.66746	4.35553	56.3638	12.9407	372.559	na	na		na	no		0	0	0	0	0	0	0	0	0	0	0	0	0
SuBe_216	Suletice-Berand	Lower Oligocene	Lauraceae	Daphnogene	Daphnogene_cinnamomifolia	evergreen_(evergreen)	shrub to small tree	entire	A	C,D	A	AB	0.805249	474.73	2.67645	6.52685	66.8835	10.2474	382.276	na	na		na	no		0	0	0	0	0	0	0	0	0	0	0	0	0
SuBe_807	Suletice-Berand	Lower Oligocene	Juglandaceae	Engelhardia	Engelhardia_orsbergensis	evergreen_(evergreen)	tree_(tree)	dentate	E or F	E	E	EF	0.806462	476.213	2.6778	5.46165	61.8602	11.3263	384.047	na	na		na	no		0	0	0	0	0	0	0	0	0	0	0	0	0
SuBe_658	Suletice-Berand	Lower Oligocene	Lauraceae	Laurophyllum	Laurophyllum_sp	evergreen_(evergreen)	shrub to small tree	entire	A	A,B	A	AB	0.958686	480.158	2.68138	3.87275	52.917	13.6639	460.32	1.00021	2.04578	obs	111.117	no		0	0	0	0	0	0	0	0	0	0	0	0	0
SuBe_528	Suletice-Berand	Lower Oligocene	Lauraceae	Laurophyllum	Laurophyllum_cfpseudoprinceps	evergreen_(evergreen)	shrub to small tree	entire	A	A	A	AB	0.910418	481.446	2.68255	6.67465	75.5555	11.3198	438.317	na	na		na	no		0	0	0	0	0	0	0	0	0	0	0	0	0
SuBe_107	Suletice-Berand	Lower Oligocene	Platanaceae	Platanus	Platanus_neptuni	deciduous_(deciduous)	tree_(tree)	dentate	E or F	E	E	EF	0.799076	486.969	2.6875	2.83942	45.4388	16.0028	389.125	na	na		na	yes	mining	53.206	10.926	13.6732	0	0	0	0	0	0	0	0	53.206	10.926
SuBe_889	Suletice-Berand	Lower Oligocene	Elaeocarpaceae	Sloanea	Sloanea_artocarpites	evergreen_(evergreen)	tree_(tree)	dentate	F	F	F	EF	0.972037	489.564	2.68981	3.06532	51.1825	16.6973	475.874	0.843563	1.98605	obs	96.8381	no		0	0	0	0	0	0	0	0	0	0	0	0	0
SuBe_80	Suletice-Berand	Lower Oligocene	Lauraceae	Daphnogene	Daphnogene_cinnamomifolia	evergreen_(evergreen)	shrub to small tree	entire	B	C,D	B	AB	0.753148	492.186	2.69213	4.80468	62.7039	13.0506	370.688	na	na		na	no		0	0	0	0	0	0	0	0	0	0	0	0	0
SuBe_443/93_2	Suletice-Berand	Lower Oligocene	Cornaceae	Cornus	Cornus_studeri	deciduous_(deciduous)	shrub to small tree	entire	B	B	B	AB	1	492.55	2.69245	2.47129	43.0183	17.4072	492.55	na	na		na	no		0	0	0	0	0	0	0	0	0	0	0	0	0
SuBe_77	Suletice-Berand	Lower Oligocene	Lauraceae	Daphnogene	Daphnogene_cinnamomifolia	evergreen_(evergreen)	shrub to small tree	entire	B	C,D	B	AB	0.805243	492.805	2.69267	4.6408	59.6495	12.8533	396.828	1.0175	2.04715	obs	111.469	no		0	0	0	0	0	0	0	0	0	0	0	0	0
SuBe_373/228	Suletice-Berand	Lower Oligocene	Platanaceae	Platanus	Platanus_neptuni	deciduous_(deciduous)	tree_(tree)	dentate	E	E	E	EF	0.987319	495.205	2.69479	3.69573	55.0272	14.8894	488.925	na	na		na	no		0	0	0	0	0	0	0	0	0	0	0	0	0
SuBe_118	Suletice-Berand	Lower Oligocene	Lauraceae	Laurophyllum	Laurophyllum_cfacutimontanum	evergreen_(evergreen)	shrub to small tree	entire	A	A	A	AB	0.899706	496.53	2.69595	5.91382	67.8389	11.4713	446.731	1.05143	2.05679	obs	113.97	no		0	0	0	0	0	0	0	0	0	0	0	0	0
SuBe_538	Suletice-Berand	Lower Oligocene	Juglandaceae	Engelhardia	Engelhardia_orsbergensis	evergreen_(evergreen)	tree_(tree)	dentate	E	E	E	EF	0.890802	499.307	2.69837	4.64462	61.9391	13.3357	444.784	0.627452	1.88457	obs	76.661	no		0	0	0	0	0	0	0	0	0	0	0	0	0
SuBe_321	Suletice-Berand	Lower Oligocene	Betulaceae	Carpinus	Carpinus_grandis	deciduous_(deciduous)	tree_(tree)	dentate	F	F	F	EF	0.97349	499.607	2.69863	2.56659	43.4055	16.9117	486.362	na	na		na	no		0	0	0	0	0	0	0	0	0	0	0	0	0
SuBe_92	Suletice-Berand	Lower Oligocene	Elaeocarpaceae	Sloanea	Sloanea_artocarpites	evergreen_(evergreen)	tree_(tree)	dentate	E	F	E	EF	0.922414	500.432	2.69934	2.91125	50.3119	17.2819	461.605	na	na		na	no		0	0	0	0	0	0	0	0	0	0	0	0	0
SuBe_275	Suletice-Berand	Lower Oligocene	Symblocaceae	Symblocos	Symblocos_deichmuelleri	evergreen_(evergreen)	shrub to small tree	dentate	E or F	E,F	E,F	EF	0.952233	504.072	2.70249	2.2306	40.2996	18.0667	479.994	1.31212	2.12778	obs	134.209	no		0	0	0	0	0	0	0	0	0	0	0	0	0
SuBe_723/870	Suletice-Berand	Lower Oligocene	Juglandaceae	Engelhardia	Engelhardia_orsbergensis	evergreen_(evergreen)	tree_(tree)	dentate	E or F	E	E	EF	0.779778	504.113	2.70253	5.37153	67.0734	12.4868	393.096	na	na		na	no		0	0	0	0	0	0	0	0	0	0	0	0	0
SuBe_684	Suletice-Berand	Lower Oligocene	Platanaceae	Platanus	Platanus_neptuni	deciduous_(deciduous)	tree_(tree)	dentate	E	E	E	EF	0.989322	506.526	2.7046	2.59122	52.5965	20.298	501.117	1.00932	2.03992	obs	109.627	no		0	0	0	0	0	0	0	0	0	0	0	0	0
SuBe_296	Suletice-Berand	Lower Oligocene	Juglandaceae	Engelhardia	Engelhardia_orsbergensis	evergreen_(evergreen)	tree_(tree)	dentate	E	E	E	EF	0.936745	507.57	2.7055	4.14625	56.4946	13.6255	475.464	na	na		na	no		0	0	0	0	0	0	0	0	0	0	0	0	0
SuBe_655	Suletice-Berand	Lower Oligocene	Juglandaceae	Engelhardia	Engelhardia_orsbergensis	evergreen_(evergreen)	tree_(tree)	dentate	E	E	E	EF	0.932595	510.814	2.70826	4.65945	59.5797	12.7869	476.383	na	na		na	no		0	0	0	0	0	0	0	0	0	0	0	0	0
SuBe_112	Suletice-Berand	Lower Oligocene	Juglandaceae	Carya	Carya_serrifolia	deciduous_(deciduous)	tree_(tree)	dentate	F	F	F	EF	0.994232	511.398	2.70876	2.57572	46.1129	17.9029	508.448	na	na		na	no		0	0	0	0	0	0	0	0	0	0	0	0	0
SuBe_455	Suletice-Berand	Lower Oligocene	Lauraceae	Laurophyllum	Laurophyllum_cfacutimontanum	evergreen_(evergreen)	shrub to small tree	entire	A	A	A	AB	0.861457	512.72	2.70988	5.47462	66.5348	12.1533	441.687	na	na		na	no		0	0	0	0	0	0	0	0	0	0	0	0	0
SuBe_894	Suletice-Berand	Lower Oligocene	Elaeocarpaceae	Sloanea	Sloanea_artocarpites	evergreen_(evergreen)	tree_(tree)	dentate	E	F	E	EF	0.927544	520.516	2.71643	1.87212	41.1552	21.9832	482.801	na	na		na	no		0	0	0	0	0	0	0	0	0	0	0	0	0
SuBe_583	Suletice-Berand	Lower Oligocene	Juglandaceae	Engelhardia	Engelhardia_orsbergensis	evergreen_(evergreen)	tree_(tree)	dentate	E or F	E	E	EF	0.940021	524.624	2.71985	3.34444	50.9474	15.2335	493.157	na	na		na	no		0	0	0	0	0	0	0	0	0	0	0	0	0
SuBe_608	Suletice-Berand	Lower Oligocene	Lauraceae	Laurophyllum	Laurophyllum_cfpseudoprinceps	evergreen_(evergreen)	shrub to small tree	entire	A	A	A	AB	0.875569	526.309	2.72124	4.13877	57.6736	13.935	460.82	na	na		na	no		0	0	0	0	0	0	0	0	0	0	0	0	0
SuBe_400	Suletice-Berand	Lower Oligocene	Betulaceae	Carpinus	Carpinus_grandis	deciduous_(deciduous)	tree_(tree)	dentate	F	F	F	EF	0.9721	526.897	2.72173	2.10382	40.3424	19.1758	512.197	0.852982	1.97754	obs	94.9596	yes	hole	2.235	0.424181	0.436356	2.235	0.424181	0	0	0	0	0	0	0	0
SuBe_393	Suletice-Berand	Lower Oligocene	Symblocaceae	Symblocos	Symblocos_deichmuelleri	evergreen_(evergreen)	shrub to small tree	dentate	E	E,F	E	EF	0.890924	531.986	2.7259	1.68949	36.4526	21.5761	473.959	na	na		na	no		0	0	0	0	0	0	0	0	0	0	0	0	0
SuBe_513	Suletice-Berand	Lower Oligocene	Lauraceae	Daphnogene	Daphnogene_cinnamomifolia	evergreen_(evergreen)	shrub to small tree	entire	A	C,D	A	AB	0.803865	537.602	2.73046	5.58802	67.0998	12.0078	432.159	na	na		na	no		0	0	0	0	0	0	0	0	0	0	0	0	0
SuBe_717/659_1	Suletice-Berand	Lower Oligocene	Juglandaceae	Engelhardia	Engelhardia_orsbergensis	evergreen_(evergreen)	tree_(tree)	dentate	E	E	E	EF	0.841437	539.307	2.73184	4.71981	61.0415	12.933	453.793	na	na		na	yes	margin	34.013	6.3068	7.49527	0	0	34.013	6.3068	0	0	0	0	0	0
SuBe_847/666	Suletice-Berand	Lower Oligocene	Oleaceae	Oleinites	Oleinites_maii	evergreen_(evergreen)	tree_(tree)	entire	A	A	A	AB	0.940213	542.604	2.73448	4.56131	61.2108	13.4196	510.163	na	na		na	no		0	0	0	0	0	0	0	0	0	0	0	0	0
SuBe_424/110	Suletice-Berand	Lower Oligocene	Juglandaceae	Engelhardia	Engelhardia_orsbergensis	evergreen_(evergreen)	tree_(tree)	dentate	E or F	E	E	EF	1	553.54	2.74315	5.1828	63.0419	12.1637	553.54	na	na		na	no		0	0	0	0	0	0	0	0	0	0	0	0	0
SuBe_876/42	Suletice-Berand	Lower Oligocene	Lauraceae	Daphnogene	Daphnogene_cinnamomifolia	evergreen_(evergreen)	shrub to small tree	entire	C	C,D	C	CD	0.804045	556.428	2.74541	4.4491	61.9932	13.9339	447.393	1.11938	2.05867	obs	114.465	no		0	0	0	0	0	0	0	0	0	0	0	0	0
SuBe_638	Suletice-Berand	Lower Oligocene	Juglandaceae	Engelhardia	Engelhardia_orsbergensis	evergreen_(evergreen)	tree_(tree)	dentate	E	E	E	EF	0.891695	570.276	2.75609	6.19696	73.8999	11.9252	508.513	na	na		na	yes	margin	38.196	6.6978	7.51131	0	0	38.196	6.6978	0	0	0	0	0	0
SuBe_63	Suletice-Berand	Lower Oligocene	Lauraceae	Daphnogene	Daphnogene_cinnamomifolia	evergreen_(evergreen)	shrub to small tree	entire	B	C,D	B	AB	0.759735	576.004	2.76043	2.9967	53.2353	17.7647	437.61	na	na		na	yes	hole/margin	30.05	5.21698	6.86684	12.544	2.17776	17.506	3.03922	0	0	0	0	0	0
SuBe_513	Suletice-Berand	Lower Oligocene	Juglandaceae	Engelhardia	Engelhardia_orsbergensis	evergreen_(evergreen)	tree_(tree)	dentate	E or F	E	E	EF	0.938975	577.255	2.76137	3.65558	57.4871	15.7258	542.028	na	na		na	no		0	0	0	0	0	0	0	0	0	0	0	0	0
SuBe_56	Suletice-Berand	Lower Oligocene	Lauraceae	Daphnogene	Daphnogene_cinnamomifolia	evergreen_(evergreen)	shrub to small tree	entire	A	C,D	A	AB	0.84854	591.448	2.77192	3.53138	57.8162	16.3721	501.867	na	na		na	no		0	0	0	0	0	0	0	0	0	0	0	0	0
SuBe_838	Suletice-Berand	Lower Oligocene	Lauraceae	Daphnogene	Daphnogene_cinnamomifolia	evergreen_(evergreen)	shrub to small tree	entire	E or F	E	E	EF	0.705003	600.351	2.7784	3.46391	57.2285	16.5214	423.249	1.00797	2.01128	obs	102.632	no		0	0	0	0	0	0	0	0	0	0	0	0	0
SuBe_154	Suletice-Berand	Lower Oligocene	Lauraceae	Laurophyllum	Laurophyllum_cfacutimontanum	evergreen_(evergreen)	shrub to small tree	entire	A	A	A	AB	0.765579	601.982	2.77958	5.21438	67.8844	13.0187	460.865	0.797371	1.93307	obs	85.7171	no		0	0	0	0	0	0	0	0	0	0	0	0	0
SuBe_754	Suletice-Berand	Lower Oligocene	Juglandaceae	Engelhardia	Engelhardia_orsbergensis	evergreen_(evergreen)	tree_(tree)	dentate	E	E	E	EF	0.973725	605.721	2.78227	4.43711	66.2271	14.9257	589.806	na	na		na	no		0	0	0	0	0	0	0	0	0	0	0	0	0
SuBe_20/719	Suletice-Berand	Lower Oligocene	Juglandaceae	Engelhardia	Engelhardia_orsbergensis	evergreen_(evergreen)	tree_(tree)	dentate	E or F	E	E	EF	0.991591	606.046	2.78251	6.0716	80.3965	13.2414	600.95	na	na		na	yes	margin	3.457	0.570418	0.575256	0	0	3.457	0.570418	0	0	0	0	0	0
SuBe_141	Suletice-Berand	Lower Oligocene	Ulmaceae	Zelkova	Zelkova_zelkovifolia	deciduous_(deciduous)	tree_(tree)	dentate	F	F	F	EF	1	619.034	2.79171	1.88336	45.7181	24.2748	619.034	0.767477	1.91576	obs	82.3673	no		0	0	0	0	0	0	0	0	0	0	0	0	0
SuBe_391	Suletice-Berand	Lower Oligocene	Lauraceae	Laurophyllum	Laurophyllum_cfacutimontanum	evergreen_(evergreen)	shrub to small tree	entire	A	A	A	AB	0.881855	630.082	2.7994	5.23915	68.6736	13.1078	555.641	na	na		na	no		0	0	0	0	0	0	0	0	0	0	0	0	0
SuBe_614	Suletice-Berand	Lower Oligocene	Lauraceae	Daphnogene	Daphnogene_cinnamomifolia	evergreen_(evergreen)	shrub to small tree	entire	F	A,F	F	EF	0.917943	630.722	2.79984	2.06302	44.0885	21.3708	578.967	0.939911	1.9799	obs	95.4773	no		0	0	0	0	0	0	0	0	0	0	0	0	0
SuBe_730/828	Suletice-Berand	Lower Oligocene	Juglandaceae	Engelhardia	Engelhardia_orsbergensis	evergreen_(evergreen)	tree_(tree)	dentate	E or F	E	E	EF	0.887425	635.894	2.80338	5.69731	81.5298	14.3102	564.308	na	na		na	no		0	0	0	0	0	0	0	0	0	0	0	0	0
SuBe_678	Suletice-Berand	Lower Oligocene	Juglandaceae	Engelhardia	Engelhardia_orsbergensis	evergreen_(evergreen)	tree_(tree)	dentate	E or F	E	E	EF	0.88061	636.198	2.80359	5.29308	74.1977	14.0179	560.242	na	na		na	no		0	0	0	0	0	0	0	0	0	0	0	0	0
SuBe_607/592	Suletice-Berand	Lower Oligocene	Juglandaceae	Engelhardia	Engelhardia_orsbergensis	evergreen_(evergreen)	tree_(tree)	dentate	E or F	E	E	EF	0.919689	637.182	2.80426	4.36999	65.4269	14.9719	586.01	na	na		na	yes	hole	24.077	3.77867	4.10863	24.077	3.77867	0	0	0	0	0	0	0	0
SuBe_87	Suletice-Berand	Lower Oligocene	Juglandaceae	Engelhardia	Engelhardia_orsbergensis	evergreen_(evergreen)	tree_(tree)	dentate	E or F	E	E	EF	0.966287	637.937	2.80478	4.11215	67.1933	16.3402	616.431	na	na		na	no		0	0	0	0	0	0	0	0	0	0	0	0	0
SuBe_132	Suletice-Berand	Lower Oligocene	Lauraceae	Laurophyllum	Laurophyllum_cfacutimontanum	evergreen_(evergreen)	shrub to small tree	entire	A	A	A	AB	0.848968	641.766	2.80738	5.25075	70.3201	13.3924	544.839	na	na		na	no		0	0	0	0	0	0	0	0	0	0	0	0	0
SuBe_491/755	Suletice-Berand	Lower Oligocene	Ulmaceae	Zelkova	Zelkova_zelkovifolia	deciduous_(deciduous)	tree_(tree)	dentate	F	F	F	EF	0.991363	642.315	2.80775	2.93302	59.0026	20.1167	636.768	0.674414	1.86674	obs	73.5767	no		0	0	0	0	0	0	0	0	0	0	0	0	0
SuBe_879	Suletice-Berand	Lower Oligocene	Magnoliaceae	Magnolia	Magnolia_sp	deciduous_(deciduous)	tree_(tree)	entire	A	A	A	AB	0.892717	643.987	2.80888	2.03675	45.1926	22.1885	574.898	1.32815	2.09117	obs	123.359	no		0	0	0	0	0	0	0	0	0	0	0	0	0
SuBe_747	Suletice-Berand	Lower Oligocene	Juglandaceae	Engelhardia	Engelhardia_orsbergensis	evergreen_(evergreen)	tree_(tree)	dentate	E or F	E	E	EF	0.861862	660.248	2.81971	5.75717	84.9996	14.7641	569.043	na	na		na	no		0	0	0	0	0	0	0	0	0	0	0	0	0
SuBe_805	Suletice-Berand	Lower Oligocene	Juglandaceae	Engelhardia	Engelhardia_orsbergensis	evergreen_(evergreen)	tree_(tree)	dentate	E or F	E	E	EF	0.99664	665.023	2.82284	4.52943	75.6775	16.708	662.788	0.70424	1.87534	obs	75.0473	no		0	0	0	0	0	0	0	0	0	0	0	0	0
SuBe_392	Suletice-Berand	Lower Oligocene	Platanaceae	Platanus	Platanus_neptuni	deciduous_(deciduous)	tree_(tree)	dentate	E or F	E	E	EF	0.850867	665.497	2.82315	3.97432	64.5364	16.2384	566.25	0.973279	1.98257	obs	96.0664	no		0	0	0	0	0	0	0	0	0	0	0	0	0
SuBe_749	Suletice-Berand	Lower Oligocene	Juglandaceae	Engelhardia	Engelhardia_orsbergensis	evergreen_(evergreen)	tree_(tree)	dentate	E	E	E	EF	0.864717	666.725	2.82395	4.61154	69.5046	15.0719	576.529	na	na		na	no		0	0	0	0	0	0	0	0	0	0	0	0	0
SuBe_829	Suletice-Berand	Lower Oligocene	Lauraceae	Laurophyllum	Laurophyllum_cfacutimontanum	evergreen_(evergreen)	shrub to small tree	entire	A	A	A	AB	0.920596	667.757	2.82462	5.51743	73.6554	13.3496	614.735	na	na		na	no		0	0	0	0	0	0	0	0	0	0	0	0	0
SuBe_873	Suletice-Berand	Lower Oligocene	Juglandaceae	Engelhardia	Engelhardia_orsbergensis	evergreen_(evergreen)	tree_(tree)	dentate	E or F	E	E	EF	0.922739	668.244	2.82494	5.68776	82.9685	14.5872	616.615	na	na		na	no		0	0	0	0	0	0	0	0	0	0	0	0	0
SuBe_596/569	Suletice-Berand	Lower Oligocene	Platanaceae	Platanus	Platanus_neptuni	deciduous_(deciduous)	tree_(tree)	dentate	E	E	E	EF	0.919423	679.554	2.83222	4.45288	66.6408	14.9658	624.797	1.08868	2.01628	obs	103.82	no		0	0	0	0	0	0	0	0	0	0	0	0	0
SuBe_449	Suletice-Berand	Lower Oligocene	Ulmaceae	Zelkova	Zelkova_zelkovifolia	deciduous_(deciduous)	tree_(tree)	dentate	F	F	F	EF	0.880472	682.282	2.83396	2.00095	43.3398	21.6596	600.731	na	na		na	no		0	0	0	0	0	0	0	0	0	0	0	0	0
SuBe_442/588	Suletice-Berand	Lower Oligocene	Lauraceae	Laurophyllum	Laurophyllum_cfpseudoprinceps	evergreen_(evergreen)	shrub to small tree	entire	A	A	A	AB	0.927554	686.872	2.83688	5.26522	74.5362	14.1563	637.112	na	na		na	yes	margin	3.812	0.554979	0.598325	0	0	3.812	0.554979	0	0	0	0	0	0
SuBe_727	Suletice-Berand	Lower Oligocene	Juglandaceae	Engelhardia	Engelhardia_orsbergensis	evergreen_(evergreen)	tree_(tree)	dentate	E	E	E	EF	0.818402	696.363	2.84284	5.17427	76.752	14.8334	569.905	na	na		na	no		0	0	0	0	0	0	0	0	0	0	0	0	0
SuBe_484	Suletice-Berand	Lower Oligocene	Dicotyledonae fam. inc. sedis	Palaeolobium	Palaeolobium_sp	evergreen_(evergreen)	na	entire	A	A	A	AB	0.921244	712.087	2.85253	2.16315	46.908	21.6851	656.006	na	na		na	no		0	0	0	0	0	0	0	0	0	0	0	0	0
SuBe_657	Suletice-Berand	Lower Oligocene	Juglandaceae	Engelhardia	Engelhardia_orsbergensis	evergreen_(evergreen)	tree_(tree)	dentate	E	F	E	EF	0.988246	712.606	2.85285	4.88661	80.568	16.4875	704.23	na	na		na	no		0	0	0	0	0	0	0	0	0	0	0	0	0
SuBe_173	Suletice-Berand	Lower Oligocene	Cornaceae	Cornus	Cornus_studeri	deciduous_(deciduous)	shrub to small tree	entire	B	B	B	AB	0.791622	713.95	2.85367	2.42999	48.8701	20.1112	565.178	na	na		na	no		0	0	0	0	0	0	0	0	0	0	0	0	0
SuBe_438	Suletice-Berand	Lower Oligocene	Lauraceae	Daphnogene	Daphnogene_cinnamomifolia	evergreen_(evergreen)	shrub to small tree	entire	C or D	C,D	C,D	CD	0.837962	714.102	2.85376	4.54238	69.6712	15.338	598.39	na	na		na	no		0	0	0	0	0	0	0	0	0	0	0	0	0
SuBe_830	Suletice-Berand	Lower Oligocene	Lauraceae	Laurophyllum	Laurophyllum_cfacutimontanum	evergreen_(evergreen)	shrub to small tree	entire	A or B	A	A	AB	0.976397	714.162	2.8538	6.26143	83.8264	13.3877	697.306	na	na		na	no		0	0	0	0	0	0	0	0	0	0	0	0	0
SuBe_701	Suletice-Berand	Lower Oligocene	Juglandaceae	Engelhardia	Engelhardia_orsbergensis	evergreen_(evergreen)	tree_(tree)	dentate	E or F	E	E	EF	0.98564	714.454	2.85397	6.26107	84.0456	13.4235	704.195	na	na		na	no		0	0	0	0	0	0	0	0	0	0	0	0	0
SuBe_872	Suletice-Berand	Lower Oligocene	Lauraceae	Laurophyllum	Lauropyhllum_sp	evergreen_(evergreen)	shrub to small tree	entire	O	L	O	OP	0.877348	714.89	2.85424	5.29669	75.0898	14.1768	627.207	1.58519	2.13254	obs	135.689	no		0	0	0	0	0	0	0	0	0	0	0	0	0
SuBe_642/352	Suletice-Berand	Lower Oligocene	Fabaceae	Leguminosae	Leguminosae_indet	na	shrub to small tree	entire	B	B	B	AB	0.995098	716.155	2.85501	2.49455	49.4914	19.8398	712.644	na	na		na	no		0	0	0	0	0	0	0	0	0	0	0	0	0
SuBe_687	Suletice-Berand	Lower Oligocene	Juglandaceae	Engelhardia	Engelhardia_orsbergensis	evergreen_(evergreen)	tree_(tree)	dentate	E or F	E	E	EF	0.850625	719.142	2.85681	6.58065	94.1704	14.3102	611.72	na	na		na	no		0	0	0	0	0	0	0	0	0	0	0	0	0
SuBe_707	Suletice-Berand	Lower Oligocene	Juglandaceae	Engelhardia	Engelhardia_orsbergensis	evergreen_(evergreen)	tree_(tree)	dentate	E or F	E	E	EF	0.997445	732.739	2.86495	5.67313	83.3224	14.6872	730.867	na	na		na	no		0	0	0	0	0	0	0	0	0	0	0	0	0
SuBe_213	Suletice-Berand	Lower Oligocene	Juglandaceae	Engelhardia	Engelhardia_orsbergensis	evergreen_(evergreen)	tree_(tree)	dentate	E or F	E	E	EF	0.993573	734.796	2.86617	3.85442	67.412	17.4895	730.074	na	na		na	no		0	0	0	0	0	0	0	0	0	0	0	0	0
SuBe_3/403	Suletice-Berand	Lower Oligocene	Juglandaceae	Engelhardia	Engelhardia_orsbergensis	evergreen_(evergreen)	tree_(tree)	dentate	E	E	E	EF	0.979995	744.03	2.87159	5.56432	80.371	14.444	729.146	na	na		na	no		0	0	0	0	0	0	0	0	0	0	0	0	0
SuBe_87/778	Suletice-Berand	Lower Oligocene	Lauraceae	Laurophyllum	Laurophyllum_cfpseudoprinceps	evergreen_(evergreen)	shrub to small tree	entire	A	A	A	AB	0.915865	746.754	2.87318	3.63778	64.6732	17.7782	683.926	0.455553	1.71157	obs	51.4719	no		0	0	0	0	0	0	0	0	0	0	0	0	0
SuBe_813	Suletice-Berand	Lower Oligocene	Juglandaceae	Engelhardia	Engelhardia_orsbergensis	evergreen_(evergreen)	tree_(tree)	dentate	E	E	E	EF	0.960108	748.12	2.87397	6.00685	88.2771	14.6961	718.276	na	na		na	no		0	0	0	0	0	0	0	0	0	0	0	0	0
SuBe_141	Suletice-Berand	Lower Oligocene	Lauraceae	Laurophyllum	Laurophyllum_cfacutimontanum	evergreen_(evergreen)	shrub to small tree	entire	A	A	A	AB	0.945644	750.301	2.87524	5.01942	74.6084	14.8639	709.517	1.89489	2.18373	obs	152.663	no		0	0	0	0	0	0	0	0	0	0	0	0	0
SuBe_698	Suletice-Berand	Lower Oligocene	Juglandaceae	Cyclocarya	Cyclocarya_cfcyclocarpa	deciduous_(deciduous)	tree_(tree)	dentate	F	F	F	EF	0.90509	751.155	2.87573	2.58187	57.3024	22.1941	679.863	na	na		na	yes	hole	10.352	1.37814	1.52266	10.352	1.37814	0	0	0	0	0	0	0	0
SuBe_721	Suletice-Berand	Lower Oligocene	Juglandaceae	Engelhardia	Engelhardia_orsbergensis	evergreen_(evergreen)	tree_(tree)	dentate	E or F	E	E	EF	0.79808	752.102	2.87628	5.11435	75.7056	14.8026	600.237	na	na		na	no		0	0	0	0	0	0	0	0	0	0	0	0	0
SuBe_302/248	Suletice-Berand	Lower Oligocene	Symblocaceae	Symblocos	Symblocos_deichmuelleri	evergreen_(evergreen)	shrub to small tree	dentate	E or F	E,F	E,F	EF	0.982585	756.854	2.87901	2.51974	52.7884	20.95	743.673	1.24413	2.04269	obs	110.33	no		0	0	0	0	0	0	0	0	0	0	0	0	0
SuBe_463/523	Suletice-Berand	Lower Oligocene	Ulmaceae	Zelkova	Zelkova_zelkovifolia	deciduous_(deciduous)	tree_(tree)	dentate	F	F	F	EF	0.97202	759.363	2.88045	2.77103	60.0196	21.6596	738.116	na	na		na	no		0	0	0	0	0	0	0	0	0	0	0	0	0
SuBe_910/908	Suletice-Berand	Lower Oligocene	Sapindaceae	Acer	Acer_tricuspidatum	deciduous_(deciduous)	tree_(tree)	dentate	O	P	O	OP	0.758891	763.624	2.88288	1.18394	48.3885	40.8709	579.508	na	na		na	no		0	0	0	0	0	0	0	0	0	0	0	0	0
SuBe_264	Suletice-Berand	Lower Oligocene	Symblocaceae	Symblocos	Symblocos_deichmuelleri	evergreen_(evergreen)	shrub to small tree	dentate	E or F	E,F	E,F	EF	0.968489	765.753	2.88409	2.10466	50.4041	23.9488	741.624	na	na		na	no		0	0	0	0	0	0	0	0	0	0	0	0	0
SuBe_156	Suletice-Berand	Lower Oligocene	Vitaceae	Ampelopsis	Ampelopsis_hibschii	deciduous_(deciduous)	shrub, climber, scrambler	dentate	F	F,J	F	EF	0.869709	786.244	2.89556	1.58958	48.2509	30.3546	683.803	0.753559	1.87001	obs	74.1335	no		0	0	0	0	0	0	0	0	0	0	0	0	0
SuBe_30	Suletice-Berand	Lower Oligocene	Lauraceae	Daphnogene	Daphnogene_cinnamomifolia	evergreen_(evergreen)	shrub to small tree	entire	A	C,D	A	AB	0.871406	786.845	2.89589	4.23972	73.0247	17.224	685.661	na	na		na	no		0	0	0	0	0	0	0	0	0	0	0	0	0
SuBe_575/854	Suletice-Berand	Lower Oligocene	Lauraceae	Laurophyllum	Laurophyllum_cfacutimontanum	evergreen_(evergreen)	shrub to small tree	entire	A	A	A	AB	0.985108	789.835	2.89754	5.51522	82.3991	14.9403	778.073	na	na		na	no		0	0	0	0	0	0	0	0	0	0	0	0	0
SuBe_516	Suletice-Berand	Lower Oligocene	Oleaceae	Oleinites	Oleinites_maii	evergreen_(evergreen)	tree_(tree)	entire	A	A	A	AB	0.869875	794.339	2.90001	2.04224	50.5935	24.7736	690.976	na	na		na	no		0	0	0	0	0	0	0	0	0	0	0	0	0
SuBe_46	Suletice-Berand	Lower Oligocene	Betulaceae	Carpinus	Carpinus_grandis	deciduous_(deciduous)	tree_(tree)	dentate	F	F	F	EF	0.793523	809.873	2.90842	1.99546	50.4564	25.2856	642.653	na	na		na	no		0	0	0	0	0	0	0	0	0	0	0	0	0
SuBe_570	Suletice-Berand	Lower Oligocene	Lauraceae	Laurophyllum	Laurophyllum_cfpseudoprinceps	evergreen_(evergreen)	shrub to small tree	entire	A	A	A	AB	0.906128	810.3	2.90865	4.83266	77.3675	16.0093	734.236	na	na		na	no		0	0	0	0	0	0	0	0	0	0	0	0	0
SuBe_448	Suletice-Berand	Lower Oligocene	Ulmaceae	Zelkova	Zelkova_zelkovifolia	deciduous_(deciduous)	tree_(tree)	dentate	F	F	F	EF	0.933716	813.564	2.91039	3.17172	67.8507	21.3924	759.638	0.77633	1.87423	obs	74.8559	no		0	0	0	0	0	0	0	0	0	0	0	0	0
SuBe_12	Suletice-Berand	Lower Oligocene	Platanaceae	Platanus	Platanus_neptuni	deciduous_(deciduous)	tree_(tree)	dentate	F	E	F	EF	0.835124	814.931	2.91112	3.76963	68.5044	18.1727	680.569	na	na		na	no		0	0	0	0	0	0	0	0	0	0	0	0	0
SuBe_3/403	Suletice-Berand	Lower Oligocene	Platanaceae	Platanus	Platanus_neptuni	deciduous_(deciduous)	tree_(tree)	dentate	F	E	F	EF	0.926319	822.527	2.91515	3.22944	62.9619	19.4962	761.923	na	na		na	yes	skeleton	14.422	1.75338	1.89284	0	0	0	0	14.422	1.75338	0	0	0	0
SuBe_51	Suletice-Berand	Lower Oligocene	Lauraceae	Daphnogene	Daphnogene_cinnamomifolia	evergreen_(evergreen)	shrub to small tree	entire	A or B	C,D	C,D	CD	0.849317	837.159	2.92281	3.8904	69.9198	17.9724	711.013	na	na		na	no		0	0	0	0	0	0	0	0	0	0	0	0	0
SuBe_87/778	Suletice-Berand	Lower Oligocene	Juglandaceae	Carya	Carya_serrifolia	deciduous_(deciduous)	tree_(tree)	dentate	F	F	F	EF	0.8641	840.88	2.92473	2.62683	60.4682	23.0194	726.605	na	na		na	no		0	0	0	0	0	0	0	0	0	0	0	0	0
SuBe_401	Suletice-Berand	Lower Oligocene	Platanaceae	Platanus	Platanus_neptuni	deciduous_(deciduous)	tree_(tree)	dentate	E	E	E	EF	0.825315	843.142	2.9259	4.10178	68.9553	16.811	695.857	0.861725	1.90293	obs	79.9701	no		0	0	0	0	0	0	0	0	0	0	0	0	0
SuBe_351	Suletice-Berand	Lower Oligocene	Juglandaceae	Engelhardia	Engelhardia_orsbergensis	evergreen_(evergreen)	tree_(tree)	dentate	B	C,D	B	AB	0.88626	844.686	2.9267	5.79002	85.7074	14.8026	748.612	na	na		na	no		0	0	0	0	0	0	0	0	0	0	0	0	0
SuBe_147/138	Suletice-Berand	Lower Oligocene	Cornaceae	Cornus	Cornus_studeri	deciduous_(deciduous)	shrub to small tree	entire	B	B	B	AB	1	846.109	2.92743	2.24765	53.5617	23.8301	846.109	0.57037	1.76543	obs	58.2676	no		0	0	0	0	0	0	0	0	0	0	0	0	0
SuBe_910	Suletice-Berand	Lower Oligocene	Symblocaceae	Symblocos	Symblocos_deichmuelleri	evergreen_(evergreen)	shrub to small tree	dentate	E or F	E,F	E,F	EF	0.731835	848.282	2.92854	2.13159	55.3328	25.9584	620.803	na	na		na	no		0	0	0	0	0	0	0	0	0	0	0	0	0
SuBe_499/912	Suletice-Berand	Lower Oligocene	Ulmaceae	Zelkova	Zelkova_zelkovifolia	deciduous_(deciduous)	tree_(tree)	dentate	F	F	F	EF	0.992624	849.408	2.92912	2.25553	57.379	25.4393	843.142	na	na		na	yes	hole	7.971	0.938419	0.945392	7.971	0.938419	0	0	0	0	0	0	0	0
SuBe_719	Suletice-Berand	Lower Oligocene	Juglandaceae	Engelhardia	Engelhardia_orsbergensis	evergreen_(evergreen)	tree_(tree)	dentate	E or F	E	E	EF	0.768303	858.577	2.93378	5.13857	83.0223	16.1567	659.647	na	na		na	no		0	0	0	0	0	0	0	0	0	0	0	0	0
SuBe_846	Suletice-Berand	Lower Oligocene	Platanaceae	Platanus	Platanus_neptuni	deciduous_(deciduous)	tree_(tree)	dentate	E	E	E	EF	0.916951	860.806	2.93491	3.45793	66.7125	19.2926	789.317	1.11959	1.98635	obs	96.9054	yes	margin	49.605	5.76262	6.28455	0	0	49.605	5.76262	0	0	0	0	0	0
SuBe_97	Suletice-Berand	Lower Oligocene	Elaeocarpaceae	Sloanea	Sloanea_artocarpites	evergreen_(evergreen)	tree_(tree)	dentate	E	F	E	EF	0.976497	877.86	2.94343	2.6317	67.011	25.463	857.228	na	na		na	no		0	0	0	0	0	0	0	0	0	0	0	0	0
SuBe_549/222	Suletice-Berand	Lower Oligocene	Lauraceae	Laurophyllum	Laurophyllum_cfacutimontanum	evergreen_(evergreen)	shrub to small tree	entire	A or B	A	A	AB	0.941579	878.312	2.94365	4.87967	81.8461	16.7729	827	na	na		na	no		0	0	0	0	0	0	0	0	0	0	0	0	0
SuBe_266	Suletice-Berand	Lower Oligocene	Symblocaceae	Symblocos	Symblocos_deichmuelleri	evergreen_(evergreen)	shrub to small tree	dentate	F	E,F	F	EF	0.847508	878.898	2.94394	1.76396	48.1456	27.294	744.873	na	na		na	no		0	0	0	0	0	0	0	0	0	0	0	0	0
SuBe_126	Suletice-Berand	Lower Oligocene	Elaeocarpaceae	Sloanea	Sloanea_artocarpites	evergreen_(evergreen)	tree_(tree)	dentate	E or F	F	F	EF	0.912117	887.172	2.94801	2.52838	60.9417	24.103	809.205	na	na		na	no		0	0	0	0	0	0	0	0	0	0	0	0	0
SuBe_713	Suletice-Berand	Lower Oligocene	Juglandaceae	Engelhardia	Engelhardia_orsbergensis	evergreen_(evergreen)	tree_(tree)	dentate	E or F	E	E	EF	0.860883	895.462	2.95205	4.51595	84.9323	18.8072	770.889	1.28607	2.0258	obs	106.119	no		0	0	0	0	0	0	0	0	0	0	0	0	0
SuBe_234/843	Suletice-Berand	Lower Oligocene	Platanaceae	Platanus	Platanus_neptuni	deciduous_(deciduous)	tree_(tree)	dentate	F	E	F	EF	0.848285	905.248	2.95677	4.59427	83.7243	18.2236	767.909	0.849131	1.88625	obs	76.9576	no		0	0	0	0	0	0	0	0	0	0	0	0	0
SuBe_93	Suletice-Berand	Lower Oligocene	Lauraceae	Laurophyllum	Laurophyllum_sp	evergreen_(evergreen)	shrub to small tree	entire	A	A,B	A	AB	0.736771	907.491	2.95784	6.39958	94.6321	14.7872	668.613	na	na		na	no		0	0	0	0	0	0	0	0	0	0	0	0	0
SuBe_686/783	Suletice-Berand	Lower Oligocene	Platanaceae	Platanus	Platanus_neptuni	deciduous_(deciduous)	tree_(tree)	dentate	E	E	E	EF	0.956454	911.341	2.95968	2.87799	64.3872	22.3723	871.655	na	na		na	no		0	0	0	0	0	0	0	0	0	0	0	0	0
SuBe_25	Suletice-Berand	Lower Oligocene	Elaeocarpaceae	Sloanea	Sloanea_artocarpites	evergreen_(evergreen)	tree_(tree)	dentate	F	F	F	EF	0.839486	928.685	2.96787	3.35529	70.9664	21.1506	779.618	na	na		na	yes	skeleton	16.476	1.77412	2.11334	0	0	0	0	16.476	1.77412	0	0	0	0
SuBe_413	Suletice-Berand	Lower Oligocene	Juglandaceae	Engelhardia	Engelhardia_orsbergensis	evergreen_(evergreen)	tree_(tree)	dentate	E or F	E	E	EF	0.923128	941.604	2.97387	4.40204	79.5217	18.0647	869.221	na	na		na	no		0	0	0	0	0	0	0	0	0	0	0	0	0
SuBe_1	Suletice-Berand	Lower Oligocene	Elaeocarpaceae	Sloanea	Sloanea_artocarpites	evergreen_(evergreen)	tree_(tree)	dentate	E or F	E	E	EF	0.997227	1406.18	3.14804	2.19382	69.573	31.7132	1402.28	na	na		na	yes	surface	8.292	0.589684	0.591324	0	0	0	0	0	0	8.292	0.589684	0	0
SuBe_2	Suletice-Berand	Lower Oligocene	Elaeocarpaceae	Sloanea	Sloanea_artocarpites	evergreen_(evergreen)	tree_(tree)	dentate	F	F	F	EF	0.808938	1234.19	3.09138	2.03825	61.4878	30.167	998.384	na	na		na	no		0	0	0	0	0	0	0	0	0	0	0	0	0
SuBe_4	Suletice-Berand	Lower Oligocene	Elaeocarpaceae	Sloanea	Sloanea_artocarpites	evergreen_(evergreen)	tree_(tree)	dentate	F	F	F	EF	0.938429	2810.44	3.44877	2.922	114.233	39.0943	2637.4	na	na		na	yes	skeleton	32.971	1.17316	1.25013	0	0	0	0	32.971	1.17316	0	0	0	0
SuBe_11	Suletice-Berand	Lower Oligocene	Platanaceae	Platanus	Platanus_neptuni	deciduous_(deciduous)	tree_(tree)	dentate	F	E	F	EF	0.828927	1315.23	3.119	3.91562	89.8922	22.9573	1090.23	na	na		na	no		0	0	0	0	0	0	0	0	0	0	0	0	0
SuBe_19	Suletice-Berand	Lower Oligocene	Elaeocarpaceae	Sloanea	Sloanea_artocarpites	evergreen_(evergreen)	tree_(tree)	dentate	F	F	F	EF	0.95155	2173.54	3.33717	2.74114	99.0523	36.1355	2068.23	na	na		na	no		0	0	0	0	0	0	0	0	0	0	0	0	0
SuBe_58	Suletice-Berand	Lower Oligocene	Elaeocarpaceae	Sloanea	Sloanea_artocarpites	evergreen_(evergreen)	tree_(tree)	dentate	E	F	E	EF	0.893416	1047.65	3.02022	2.25641	61.1343	27.0936	935.988	na	na		na	no		0	0	0	0	0	0	0	0	0	0	0	0	0
SuBe_68	Suletice-Berand	Lower Oligocene	Dicotyledonae fam. inc. sedis	Dicotylophyllum	Dicotylophyllum_sp1	deciduous_(deciduous)	na	entire	A	A,B	A	AB	0.71714	1344.02	3.12841	1.76601	61.0877	34.5907	963.851	0.930965	1.85121	obs	70.9928	no		0	0	0	0	0	0	0	0	0	0	0	0	0
SuBe_76	Suletice-Berand	Lower Oligocene	Lauraceae	Daphnogene	Daphnogene_cinnamomifolia	evergreen_(evergreen)	shrub to small tree	entire	A	C,D	A	AB	0.969888	1953.14	3.29073	3.27253	109.403	33.4308	1894.32	na	na		na	no		0	0	0	0	0	0	0	0	0	0	0	0	0
SuBe_119	Suletice-Berand	Lower Oligocene	Magnoliaceae	Magnolia	Magnolia_sp	deciduous_(deciduous)	tree_(tree)	entire	A	A	A	AB	0.768959	2693.2	3.43027	4.21281	124.219	29.4861	2070.96	na	na		na	no		0	0	0	0	0	0	0	0	0	0	0	0	0
SuBe_119	Suletice-Berand	Lower Oligocene	Cornaceae	Cornus	Cornus_studeri	deciduous_(deciduous)	shrub to small tree	entire	B	B	B	AB	0.725324	3235.16	3.5099	1.80781	92.321	51.0678	2346.54	na	na		na	no		0	0	0	0	0	0	0	0	0	0	0	0	0
SuBe_130	Suletice-Berand	Lower Oligocene	Lauraceae	Laurophyllum	Laurophyllum_cfacutimontanum	evergreen_(evergreen)	shrub to small tree	entire	A	A	A	AB	0.880107	1472.32	3.168	4.86398	105.414	21.6724	1295.8	na	na		na	yes	skeleton	18.122	1.23084	1.39852	0	0	0	0	18.122	1.23084	0	0	0	0
SuBe_133	Suletice-Berand	Lower Oligocene	Lauraceae	Laurophyllum	Laurophyllum_cfacutimontanum	evergreen_(evergreen)	shrub to small tree	entire	A or B	B	B	AB	0.839804	1491.16	3.17352	5.32974	108.386	20.3361	1252.28	0.86314	1.80888	obs	64.3991	no		0	0	0	0	0	0	0	0	0	0	0	0	0
SuBe_148	Suletice-Berand	Lower Oligocene	Lauraceae	Laurophyllum	Laurophyllum_cfacutimontanum	evergreen_(evergreen)	shrub to small tree	entire	A	A	A	AB	0.861635	1109.42	3.04509	3.88155	79.7677	20.5505	955.913	na	na		na	no		0	0	0	0	0	0	0	0	0	0	0	0	0
SuBe_150	Suletice-Berand	Lower Oligocene	Oleaceae	Oleinites	Oleinites_maii	evergreen_(evergreen)	tree_(tree)	entire	A	A	A	AB	0.965126	1692.45	3.22851	3.23711	95.3674	29.4607	1633.42	1.21082	1.90018	obs	79.466	no		0	0	0	0	0	0	0	0	0	0	0	0	0
SuBe_157	Suletice-Berand	Lower Oligocene	Fabaceae	Leguminosae	Leguminosae_indet	semi-deciduous	shrub to small tree	entire	B	B	B	AB	0.797693	1454.06	3.16258	1.55941	57.7563	37.0373	1159.9	1.37751	1.96816	obs	92.9312	no		0	0	0	0	0	0	0	0	0	0	0	0	0
SuBe_158	Suletice-Berand	Lower Oligocene	Lauraceae	Laurophyllum	Laurophyllum_cfpseudoprinceps	evergreen_(evergreen)	shrub to small tree	entire	A	A	A	AB	0.817469	1472.06	3.16793	4.5598	103.638	22.7286	1203.36	na	na		na	no		0	0	0	0	0	0	0	0	0	0	0	0	0
SuBe_162	Suletice-Berand	Lower Oligocene	Oleaceae	Oleinites	Oleinites_maii	evergreen_(evergreen)	tree_(tree)	entire	A	A	A	AB	0.937034	1603.08	3.20495	2.80025	84.9562	30.3388	1502.14	na	na		na	no		0	0	0	0	0	0	0	0	0	0	0	0	0
SuBe_164	Suletice-Berand	Lower Oligocene	Oleaceae	Oleinites	Oleinites_maii	evergreen_(evergreen)	tree_(tree)	entire	A or B	A	A	AB	0.990684	1249.97	3.0969	2.89436	74.9195	25.8847	1238.33	na	na		na	no		0	0	0	0	0	0	0	0	0	0	0	0	0
SuBe_174	Suletice-Berand	Lower Oligocene	Oleaceae	Oleinites	Oleinites_maii	evergreen_(evergreen)	tree_(tree)	entire	A	A	A	AB	0.97316	1340.6	3.1273	3.40091	87.6853	25.7829	1304.62	na	na		na	no		0	0	0	0	0	0	0	0	0	0	0	0	0
SuBe_187	Suletice-Berand	Lower Oligocene	Oleaceae	Oleinites	Oleinites_maii	evergreen_(evergreen)	tree_(tree)	entire	A	A	A	AB	0.971817	1381.28	3.14028	3.2235	84.9571	26.3555	1342.35	na	na		na	no		0	0	0	0	0	0	0	0	0	0	0	0	0
SuBe_234	Suletice-Berand	Lower Oligocene	Cornaceae	Cornus	Cornus_studeri	deciduous_(deciduous)	shrub to small tree	entire	B	B	B	AB	0.864584	1372.34	3.13746	2.09142	65.6325	31.3819	1186.51	na	na		na	no		0	0	0	0	0	0	0	0	0	0	0	0	0
SuBe_236	Suletice-Berand	Lower Oligocene	Elaeocarpaceae	Sloanea	Sloanea_artocarpites	evergreen_(evergreen)	tree_(tree)	dentate	F	F	F	EF	0.762345	1496.81	3.17517	2.28796	73.9274	32.3115	1141.08	na	na		na	yes	hole	12.587	0.840923	1.10307	12.587	0.840923	0	0	0	0	0	0	0	0
SuBe _240	Suletice-Berand	Lower Oligocene	Lauraceae	Laurophyllum	Laurophyllum_cfacutimontanum	evergreen_(evergreen)	shrub to small tree	entire	A	A	A	AB	0.877121	998.859	2.9995	5.6018	92.3898	16.4929	876.12	1.01698	1.92977	obs	85.0697	no		0	0	0	0	0	0	0	0	0	0	0	0	0
SuBe_265	Suletice-Berand	Lower Oligocene	Elaeocarpaceae	Sloanea	Sloanea_artocarpites	evergreen_(evergreen)	tree_(tree)	dentate	F	F	F	EF	0.943057	1069.37	3.02913	2.43012	63.0265	25.9356	1008.48	na	na		na	no		0	0	0	0	0	0	0	0	0	0	0	0	0
SuBe_273	Suletice-Berand	Lower Oligocene	Cannabaceae	Celtis	Celtis_sp	deciduous_(deciduous)	tree_(tree)	dentate	F	F	F	EF	0.715096	2207.34	3.34387	2.56068	93.4485	36.4937	1578.46	na	na		na	no		0	0	0	0	0	0	0	0	0	0	0	0	0
SuBe_352	Suletice-Berand	Lower Oligocene	Cornaceae	Cornus	Cornus_studeri	deciduous_(deciduous)	shrub to small tree	entire	B	B	B	AB	0.866095	1063.58	3.02677	1.7421	53.245	30.5637	921.164	1.00228	1.91453	obs	82.1353	no		0	0	0	0	0	0	0	0	0	0	0	0	0
SuBe_398	Suletice-Berand	Lower Oligocene	Oleaceae	Oleinites	Oleinites_maii	evergreen_(evergreen)	tree_(tree)	entire	A	A	A	AB	0.912235	947.628	2.97664	2.42001	63.3802	26.1901	864.459	na	na		na	no		0	0	0	0	0	0	0	0	0	0	0	0	0
SuBe_431	Suletice-Berand	Lower Oligocene	Platanaceae	Platanus	Platanus_neptuni	deciduous_(deciduous)	tree_(tree)	dentate	E	F	E	EF	0.777916	2353.85	3.37178	3.57523	109.469	30.6187	1831.09	1.11471	1.81801	obs	65.7675	no		0	0	0	0	0	0	0	0	0	0	0	0	0
SuBe_431	Suletice-Berand	Lower Oligocene	Elaeocarpaceae	Sloanea	Sloanea_artocarpites	evergreen_(evergreen)	tree_(tree)	dentate	E	E	E	EF	0.833131	3247.34	3.51153	2.43297	109.373	44.9546	2705.46	na	na		na	no		0	0	0	0	0	0	0	0	0	0	0	0	0
SuBe_433	Suletice-Berand	Lower Oligocene	Betulaceae	Ostrya	Ostrya_atlantidis	deciduous_(deciduous)	tree_(tree)	dentate	E	E	E	EF	0.70995	2723.61	3.43515	1.86242	87.0307	46.7299	1933.63	na	na		na	no		0	0	0	0	0	0	0	0	0	0	0	0	0
SuBe_434	Suletice-Berand	Lower Oligocene	Oleaceae	Oleinites	Oleinites_maii	evergreen_(evergreen)	tree_(tree)	entire	A	A	A	AB	0.843299	1148.32	3.06006	3.13778	74.7516	23.8231	968.38	0.852366	1.84805	obs	70.478	no		0	0	0	0	0	0	0	0	0	0	0	0	0
SuBe_462	Suletice-Berand	Lower Oligocene	Symblocaceae	Symblocos	Symblocos_deichmuelleri	evergreen_(evergreen)	shrub to small tree	dentate	E	E,F	E	EF	0.997632	1470.05	3.16733	1.58401	58.6796	37.0449	1466.57	1.0568	1.87841	obs	75.5803	no		0	0	0	0	0	0	0	0	0	0	0	0	0
SuBe_474	Suletice-Berand	Lower Oligocene	Dicotyledonae fam. inc. sedis	Dicotylophyllum	Dicotylophyllum_sp5	deciduous_(deciduous)	na	dentate	E	E	E	EF	0.954454	1092.41	3.03839	1.63291	51.6091	31.6056	1042.65	0.999156	1.90906	obs	81.1067	yes	hole/margin	21.278	1.9478	2.04075	5.969	0.546407	15.309	1.4014	0	0	0	0	0	0
SuBe_485	Suletice-Berand	Lower Oligocene	Ulmaceae	Zelkova	Zelkova_zelkovifolia	deciduous_(deciduous)	tree_(tree)	dentate	F	F	F	EF	0.856685	1976.11	3.29581	1.93911	75.4883	38.9293	1692.91	0.907983	1.77897	obs	60.1134	yes	hole	7.079	0.358228	0.418156	7.079	0.358228	0	0	0	0	0	0	0	0
SuBe_513	Suletice-Berand	Lower Oligocene	Juglandaceae	Cyclocarya	Cyclocarya_cfcyclocarpa	deciduous_(deciduous)	tree_(tree)	dentate	F	F	F	EF	0.916314	1140.72	3.05718	2.75409	69.7592	25.3293	1045.26	na	na		na	no		0	0	0	0	0	0	0	0	0	0	0	0	0
SuBe_513	Suletice-Berand	Lower Oligocene	Juglandaceae	Carya	Carya_serrifolia	deciduous_(deciduous)	tree_(tree)	dentate	E	F	E	EF	0.813503	1280.41	3.10735	3.32538	84.4796	25.4045	1041.62	na	na		na	yes	margin	65.651	5.12733	6.30277	0	0	65.651	5.12733	0	0	0	0	0	0
SuBe_526	Suletice-Berand	Lower Oligocene	Cornaceae	Cornus	Cornus_studeri	deciduous_(deciduous)	shrub to small tree	entire	B	B	B	AB	0.812345	3477.38	3.54125	2.47246	108.41	43.8471	2824.84	na	na		na	no		0	0	0	0	0	0	0	0	0	0	0	0	0
SuBe_545	Suletice-Berand	Lower Oligocene	Elaeocarpaceae	Sloanea	Sloanea_artocarpites	evergreen_(evergreen)	tree_(tree)	dentate	E	F	E	EF	0.797036	5309.71	3.72507	2.35444	136.27	57.8778	4232.03	na	na		na	yes	skeleton	21.654	0.407819	0.51167	0	0	0	0	21.654	0.407819	0	0	0	0
SuBe_580	Suletice-Berand	Lower Oligocene	Juglandaceae	Engelhardia	Engelhardia_orsbergensis	evergreen_(evergreen)	tree_(tree)	dentate	E or F	E	E	EF	0.953411	1393.2	3.14401	3.38944	83.9686	24.7736	1328.29	na	na		na	no		0	0	0	0	0	0	0	0	0	0	0	0	0
SuBe_584	Suletice-Berand	Lower Oligocene	Lauraceae	Laurophyllum	Laurophyllum_cfacutimontanum	evergreen_(evergreen)	shrub to small tree	entire	A	A	A	AB	0.975591	2365.97	3.37401	5.39494	138.136	25.6047	2308.22	0.901506	1.74672	obs	55.8116	yes	hole/margin	48.199	2.03718	2.08815	30.485	1.28848	17.714	0.748699	0	0	0	0	0	0
SuBe_611	Suletice-Berand	Lower Oligocene	Elaeocarpaceae	Sloanea	Sloanea_artocarpites	evergreen_(evergreen)	tree_(tree)	dentate	E	F	E	EF	0.901295	3228.05	3.50894	2.80851	115.774	41.2226	2909.42	na	na		na	no		0	0	0	0	0	0	0	0	0	0	0	0	0
SuBe_614	Suletice-Berand	Lower Oligocene	Dicotyledonae fam. inc. sedis	Dicotylophyllum	Dicotylophyllum_sp4	semi-deciduous	na	dentate	B	C,D	B	AB	0.985004	1079.39	3.03318	2.47569	65.827	26.5893	1063.21	1.50921	2.04789	obs	111.658	no		0	0	0	0	0	0	0	0	0	0	0	0	0
SuBe_624	Suletice-Berand	Lower Oligocene	Oleaceae	Oleinites	Oleinites_maii	evergreen_(evergreen)	tree_(tree)	entire	A	A	A	AB	0.980951	1208.98	3.08242	2.19253	65.4027	29.8297	1185.95	na	na		na	no		0	0	0	0	0	0	0	0	0	0	0	0	0
SuBe_645	Suletice-Berand	Lower Oligocene	Juglandaceae	Engelhardia	Engelhardia_orsbergensis	evergreen_(evergreen)	tree_(tree)	dentate	E or F	E	E	EF	0.840874	983.355	2.99271	4.89174	85.1689	17.4108	826.877	na	na		na	yes	margin	4.408	0.448261	0.53309	0	0	4.408	0.448261	0	0	0	0	0	0
SuBe_654	Suletice-Berand	Lower Oligocene	Platanaceae	Platanus	Platanus_neptuni	deciduous_(deciduous)	tree_(tree)	dentate	E	E	E	EF	0.821609	948.695	2.97713	2.92225	64.5592	22.0923	779.456	na	na		na	no		0	0	0	0	0	0	0	0	0	0	0	0	0
SuBe_657	Suletice-Berand	Lower Oligocene	Elaeocarpaceae	Sloanea	Sloanea_artocarpites	evergreen_(evergreen)	tree_(tree)	dentate	E or F	E	E	EF	0.968252	977.876	2.99028	2.13376	58.7075	27.5136	946.83	na	na		na	no		0	0	0	0	0	0	0	0	0	0	0	0	0
SuBe_658	Suletice-Berand	Lower Oligocene	Malvaceae	Dombeyopsis	Dombeyopsis_sp2	deciduous_(deciduous)	tree_(tree)	entire	A or B	B	B	AB	0.772631	6092.16	3.78477	0.955547	119.077	124.616	4706.99	4.23859	2.10341	obs	126.886	no		0	0	0	0	0	0	0	0	0	0	0	0	0
SuBe_668	Suletice-Berand	Lower Oligocene	Elaeocarpaceae	Sloanea	Sloanea_artocarpites	evergreen_(evergreen)	tree_(tree)	dentate	E	F	E	EF	0.877264	1347.03	3.12938	2.74896	81.3836	29.6052	1181.7	na	na		na	no		0	0	0	0	0	0	0	0	0	0	0	0	0
SuBe_669	Suletice-Berand	Lower Oligocene	Juglandaceae	Engelhardia	Engelhardia_orsbergensis	evergreen_(evergreen)	tree_(tree)	dentate	E or F	E	E	EF	0.904047	992.232	2.99661	5.17474	92.047	17.7877	897.025	na	na		na	no		0	0	0	0	0	0	0	0	0	0	0	0	0
SuBe_677	Suletice-Berand	Lower Oligocene	Platanaceae	Platanus	Platanus_neptuni	deciduous_(deciduous)	tree_(tree)	dentate	E	E	E	EF	0.942181	1708.85	3.23271	3.14758	92.9702	29.537	1610.05	na	na		na	no		0	0	0	0	0	0	0	0	0	0	0	0	0
SuBe_702	Suletice-Berand	Lower Oligocene	Juglandaceae	Engelhardia	Engelhardia_orsbergensis	evergreen_(evergreen)	tree_(tree)	dentate	E or F	E	E	EF	0.972197	1711.22	3.23331	4.95083	114.651	23.1579	1663.64	na	na		na	yes	margin	18.921	1.1057	1.13733	0	0	18.921	1.1057	0	0	0	0	0	0
SuBe_719	Suletice-Berand	Lower Oligocene	Ulmaceae	Zelkova	Zelkova_zelkovifolia	deciduous_(deciduous)	tree_(tree)	dentate	F	F	F	EF	0.843547	1843.01	3.26553	2.56477	92.0931	35.907	1554.66	na	na		na	yes	margin	89.588	4.86097	5.76254	0	0	89.588	4.86097	0	0	0	0	0	0
SuBe_722	Suletice-Berand	Lower Oligocene	Juglandaceae	Engelhardia	Engelhardia_orsbergensis	evergreen_(evergreen)	tree_(tree)	dentate	E or F	E	E	EF	0.924074	983.238	2.99266	4.85372	87.3077	17.9878	908.584	na	na		na	no		0	0	0	0	0	0	0	0	0	0	0	0	0
SuBe_724	Suletice-Berand	Lower Oligocene	Lauraceae	Laurophyllum	Laurophyllum_sp	evergreen_(evergreen)	shrub to small tree	entire	A	A,B	A	AB	0.728438	1134.1	3.05465	5.27823	99.2483	18.8033	826.124	na	na		na	no		0	0	0	0	0	0	0	0	0	0	0	0	0
SuBe_758	Suletice-Berand	Lower Oligocene	Sapindaceae	Acer	Acer_palaeosaccharinum	deciduous_(deciduous)	tree_(tree)	dentate	O	P	O	OP	0.857432	2975.49	3.47356	1.02137	72.9359	71.4101	2551.28	na	na		na	no		0	0	0	0	0	0	0	0	0	0	0	0	0
SuBe_762	Suletice-Berand	Lower Oligocene	Sapindaceae	Acer	Acer_palaeosaccharinum	deciduous_(deciduous)	tree_(tree)	dentate	P	P	P	OP	0.69663	1750.87	3.24325	0.804102	63.0318	78.3878	1219.71	na	na		na	no		0	0	0	0	0	0	0	0	0	0	0	0	0
SuBe_767	Suletice-Berand	Lower Oligocene	Juglandaceae	Cyclocarya	Cyclocarya_cfcyclocarpa	deciduous_(deciduous)	tree_(tree)	dentate	B	B	B	AB	0.828209	1481.24	3.17063	2.5089	78.9811	31.4804	1226.78	na	na		na	no		0	0	0	0	0	0	0	0	0	0	0	0	0
SuBe_783	Suletice-Berand	Lower Oligocene	Sapindaceae	Acer	Acer_tricuspidatum	deciduous_(deciduous)	tree_(tree)	dentate	P	P	P	OP	0.857806	1795.34	3.25415	0.974743	72.5797	74.4603	1540.05	na	na		na	no		0	0	0	0	0	0	0	0	0	0	0	0	0
SuBe_791	Suletice-Berand	Lower Oligocene	Cornaceae	Cornus	Cornus_studeri	deciduous_(deciduous)	shrub to small tree	entire	B	B	B	AB	0.788024	1497.89	3.17548	1.65638	59.4874	35.914	1180.37	na	na		na	no		0	0	0	0	0	0	0	0	0	0	0	0	0
SuBe_805	Suletice-Berand	Lower Oligocene	Lauraceae	Laurophyllum	Laurophyllum_cfpseudoprinceps	evergreen_(evergreen)	shrub to small tree	entire	A	A	A	AB	0.83652	990.509	2.99586	4.82365	83.8529	17.3837	828.581	na	na		na	no		0	0	0	0	0	0	0	0	0	0	0	0	0
SuBe_813	Suletice-Berand	Lower Oligocene	Lauraceae	Laurophyllum	Laurophyllum_cfpseudoprinceps	evergreen_(evergreen)	shrub to small tree	entire	A	A	A	AB	0.779321	1047.97	3.02035	5.39746	92.3855	17.1165	816.705	na	na		na	no		0	0	0	0	0	0	0	0	0	0	0	0	0
SuBe_813	Suletice-Berand	Lower Oligocene	Lauraceae	Laurophyllum	Laurophyllum_cfpseudoprinceps	evergreen_(evergreen)	shrub to small tree	entire	A	A	A	AB	0.830538	1493.2	3.17412	3.67554	91.7725	24.9684	1240.16	na	na		na	no		0	0	0	0	0	0	0	0	0	0	0	0	0
SuBe_819	Suletice-Berand	Lower Oligocene	Sapindaceae	Acer	Acer_palaeosaccharinum	deciduous_(deciduous)	tree_(tree)	dentate	P	P	P	OP	0.887632	1828.81	3.26217	1.23325	77.6472	62.9613	1623.31	na	na		na	no		0	0	0	0	0	0	0	0	0	0	0	0	0
SuBe_831	Suletice-Berand	Lower Oligocene	Platanaceae	Platanus	Platanus_neptuni	deciduous_(deciduous)	tree_(tree)	dentate	E	E	E	EF	1	1135.45	3.05517	3.38592	77.4313	22.8686	1135.45	na	na		na	no		0	0	0	0	0	0	0	0	0	0	0	0	0
SuBe_872	Suletice-Berand	Lower Oligocene	Sapindaceae	Acer	Acer_cfintegrilobum	deciduous_(deciduous)	tree_(tree)	dentate	A	A,B	A	AB	0.891246	2237.01	3.34967	1.22545	83.6213	68.2372	1993.73	na	na		na	no		0	0	0	0	0	0	0	0	0	0	0	0	0
SuBe_873	Suletice-Berand	Lower Oligocene	Dicotyledonae fam. inc. sedis	Dicotylophyllum	Dicotylophyllum_sp3	na	na	entire	B	na	B	AB	0.919279	1099.07	3.04103	2.26744	60.5337	26.697	1010.35	na	na		na	no		0	0	0	0	0	0	0	0	0	0	0	0	0
SuBe_873	Suletice-Berand	Lower Oligocene	Lauraceae	Laurophyllum	Lauropyhllum_sp	evergreen_(evergreen)	shrub to small tree	entire	A	A,B	A	AB	0.952904	1429.81	3.15528	4.49427	102.034	22.7032	1362.47	na	na		na	no		0	0	0	0	0	0	0	0	0	0	0	0	0
SuBe_901	Suletice-Berand	Lower Oligocene	Elaeocarpaceae	Sloanea	Sloanea_artocarpites	evergreen_(evergreen)	tree_(tree)	dentate	F	F	F	EF	0.813848	2027.02	3.30686	3.56887	109.035	30.5515	1649.69	na	na		na	no		0	0	0	0	0	0	0	0	0	0	0	0	0
SuBe_903	Suletice-Berand	Lower Oligocene	Sapindaceae	Acer	Acer_tricuspidatum	deciduous_(deciduous)	tree_(tree)	dentate	E or F	E,F	E,F	EF	0.711262	1593.99	3.20249	0.837055	60.8811	72.7325	1133.75	1.8336	2.04782	obs	111.639	no		0	0	0	0	0	0	0	0	0	0	0	0	0
SuBe_907	Suletice-Berand	Lower Oligocene	Sapindaceae	Acer	Acer_tricuspidatum	deciduous_(deciduous)	tree_(tree)	dentate	P	P	P	OP	0.730146	1689.46	3.22775	0.864284	62.3026	72.0858	1233.55	na	na		na	no		0	0	0	0	0	0	0	0	0	0	0	0	0
SuBe_911	Suletice-Berand	Lower Oligocene	Sapindaceae	Acer	Acer_tricuspidatum	deciduous_(deciduous)	tree_(tree)	dentate	O	P	O	OP	0.763617	2424.82	3.38468	0.945464	78.6084	83.1427	1851.64	1.38657	1.8855	obs	76.8237	yes	hole	29.974	1.23613	1.61878	29.974	1.23613	0	0	0	0	0	0	0	0
SuBe_104/216	Suletice-Berand	Lower Oligocene	Juglandaceae	Carya	Carya_serrifolia	deciduous_(deciduous)	tree_(tree)	dentate	F	F	F	EF	0.982789	4131.69	3.61613	2.89587	147.383	50.8943	4060.58	0.865304	1.64064	obs	43.7156	no		0	0	0	0	0	0	0	0	0	0	0	0	0
SuBe_185/914	Suletice-Berand	Lower Oligocene	Oleaceae	Oleinites	Oleinites_maii	evergreen_(evergreen)	tree_(tree)	entire	A	A	A	AB	0.947033	1311.67	3.11782	3.54785	87.5457	24.6757	1242.19	na	na		na	no		0	0	0	0	0	0	0	0	0	0	0	0	0
SuBe_186/17	Suletice-Berand	Lower Oligocene	Oleaceae	Oleinites	Oleinites_maii	evergreen_(evergreen)	tree_(tree)	entire	A	A	A	AB	0.911016	1630.62	3.21235	2.90209	86.4922	29.8034	1485.52	na	na		na	no		0	0	0	0	0	0	0	0	0	0	0	0	0
SuBe_25/885	Suletice-Berand	Lower Oligocene	Betulaceae	Carpinus	Carpinus_grandis	deciduous_(deciduous)	tree_(tree)	dentate	F	F	F	EF	0.989463	1175.15	3.07009	1.87741	56.7599	30.2332	1162.77	0.716605	1.78666	obs	61.1868	yes	hole	14.336	1.21993	1.23292	14.336	1.21993	0	0	0	0	0	0	0	0
SuBe_262/155	Suletice-Berand	Lower Oligocene	Lauraceae	Laurophyllum	Laurophyllum_cfacutimontanum	evergreen_(evergreen)	shrub to small tree	entire	A	A	A	AB	0.875489	1203.01	3.08027	3.91129	84.3857	21.5749	1053.22	na	na		na	no		0	0	0	0	0	0	0	0	0	0	0	0	0
SuBe_285/7	Suletice-Berand	Lower Oligocene	Platanaceae	Platanus	Platanus_neptuni	deciduous_(deciduous)	tree_(tree)	dentate	E	E	E	EF	0.758131	2183.66	3.33918	3.47879	104.48	30.0334	1655.5	1.33989	1.89151	obs	77.8955	no		0	0	0	0	0	0	0	0	0	0	0	0	0
SuBe_289/300	Suletice-Berand	Lower Oligocene	Symblocaceae	Symblocos	Symblocos_deichmuelleri	evergreen_(evergreen)	shrub to small tree	dentate	F	E,F	F	EF	0.726759	1039.07	3.01664	1.63358	49.6206	30.3754	755.152	0.806426	1.84626	obs	70.1871	no		0	0	0	0	0	0	0	0	0	0	0	0	0
SuBe_390/411	Suletice-Berand	Lower Oligocene	Oleaceae	Oleinites	Oleinites_maii	evergreen_(evergreen)	tree_(tree)	entire	A	A	A	AB	0.848335	1543.43	3.18849	2.81816	84.6568	30.0397	1309.35	na	na		na	no		0	0	0	0	0	0	0	0	0	0	0	0	0
SuBe_59/240	Suletice-Berand	Lower Oligocene	Lauraceae	Daphnogene	Daphnogene_cinnamomifolia	evergreen_(evergreen)	shrub to small tree	entire	A	C,D	A	AB	0.951092	1022.22	3.00954	3.64074	73.973	20.3181	972.222	na	na		na	no		0	0	0	0	0	0	0	0	0	0	0	0	0
SuBe_602/765	Suletice-Berand	Lower Oligocene	Sapindaceae	Acer	Acer_palaeosaccharinum	deciduous_(deciduous)	tree_(tree)	dentate	P	P	P	OP	0.983333	1108.91	3.0449	0.797757	47.074	59.008	1090.43	na	na		na	no		0	0	0	0	0	0	0	0	0	0	0	0	0
SuBe_616/2	Suletice-Berand	Lower Oligocene	Juglandaceae	Engelhardia	Engelhardia_orsbergensis	evergreen_(evergreen)	tree_(tree)	dentate	E or F	E	E	EF	0.902999	1020.62	3.00887	4.01636	81.2066	20.2189	921.622	0.680574	1.79293	obs	62.0769	yes	surface	15.429	1.51172	1.67411	0	0	0	0	0	0	15.429	1.51172	0	0
SuBe_616/6	Suletice-Berand	Lower Oligocene	Lauraceae	Daphnogene	Daphnogene_cinnamomifolia	evergreen_(evergreen)	shrub to small tree	entire	D	C,D	D	CD	0.929649	998.29	2.99926	4.09858	79.8871	19.4914	928.059	na	na		na	no		0	0	0	0	0	0	0	0	0	0	0	0	0
SuBe_63/236	Suletice-Berand	Lower Oligocene	Elaeocarpaceae	Sloanea	Sloanea_artocarpites	evergreen_(evergreen)	tree_(tree)	dentate	E	F	E	EF	0.919909	3098.74	3.49118	2.89738	114.008	39.3488	2850.56	na	na		na	no		0	0	0	0	0	0	0	0	0	0	0	0	0
SuBe_658/867	Suletice-Berand	Lower Oligocene	Dicotyledonae fam. inc. sedis	Dicotylophyllum	Dicotylophyllum_sp4	semi-deciduous	na	entire	A	A,F	A	AB	0.966825	1548.73	3.18998	1.93981	66.9503	34.5138	1497.35	1.53875	1.99443	obs	98.7247	no		0	0	0	0	0	0	0	0	0	0	0	0	0
SuBe_659_2	Suletice-Berand	Lower Oligocene	Lauraceae	Laurophyllum	Laurophyllum_sp	evergreen_(evergreen)	shrub to small tree	entire	A or B	A,B	A,B	AB	0.758425	1626.15	3.21116	3.06794	84.0764	27.4048	1233.31	na	na		na	no		0	0	0	0	0	0	0	0	0	0	0	0	0
SuBe_659_2	Suletice-Berand	Lower Oligocene	Cornaceae	Cornus	Cornus_studeri	deciduous_(deciduous)	shrub to small tree	entire	A or B	B	B	AB	0.817823	1905.44	3.28	2.27822	76.702	33.6675	1558.31	1.17831	1.87148	obs	74.3849	no		0	0	0	0	0	0	0	0	0	0	0	0	0
SuBe_685/268	Suletice-Berand	Lower Oligocene	Lauraceae	Laurophyllum	Laurophyllum_cfacutimontanum	evergreen_(evergreen)	shrub to small tree	entire	A	A	A	AB	0.944125	1610.19	3.20688	4.94787	107.988	21.8251	1520.22	na	na		na	yes	hole	4.051	0.251586	0.266475	4.051	0.251586	0	0	0	0	0	0	0	0
SuBe_688/270	Suletice-Berand	Lower Oligocene	Fabaceae	Leguminosae	Leguminosae_indet	semi-deciduous	shrub to small tree	entire	B	B	B	AB	0.944593	1174.26	3.06976	2.02574	59.5895	29.4161	1109.2	1.10156	1.92945	obs	85.0052	no		0	0	0	0	0	0	0	0	0	0	0	0	0
SuBe_697/712	Suletice-Berand	Lower Oligocene	Lauraceae	Laurophyllum	Lauropyhllum_sp	evergreen_(evergreen)	shrub to small tree	entire	A	A,B	A	AB	0.96222	1150.92	3.06104	4.94653	94.0781	19.019	1107.44	na	na		na	no		0	0	0	0	0	0	0	0	0	0	0	0	0
SuBe_705/459	Suletice-Berand	Lower Oligocene	Juglandaceae	Cyclocarya	Cyclocarya_cfcyclocarpa	deciduous_(deciduous)	tree_(tree)	dentate	F	F	F	EF	0.81285	1738.42	3.24016	3.59149	101.071	28.1418	1413.08	na	na		na	yes	margin/skeleton	104.259	5.99733	7.37815	0	0	101.812	5.85657	2.447	0.14076	0	0	0	0
SuBe_723/671	Suletice-Berand	Lower Oligocene	Magnoliaceae	Magnolia	Magnolia_sp	deciduous_(deciduous)	tree_(tree)	entire	A or B	A	A	AB	0.884647	3995.09	3.60153	3.07039	130.331	42.4476	3534.24	na	na		na	no		0	0	0	0	0	0	0	0	0	0	0	0	0
SuBe_737/168	Suletice-Berand	Lower Oligocene	Cornaceae	Cornus	Cornus_studeri	deciduous_(deciduous)	shrub to small tree	entire	B	B	B	AB	0.987386	1210.78	3.08307	1.63193	55.4708	33.991	1195.51	na	na		na	yes	hole	0.684	0.0564925	0.0572142	0.684	0.0564925	0	0	0	0	0	0	0	0
SuBe_737/187	Suletice-Berand	Lower Oligocene	Oleaceae	Oleinites	Oleinites_maii	evergreen_(evergreen)	tree_(tree)	entire	A	A	A	AB	0.968248	1190.34	3.07567	3.43433	79.9121	23.2686	1152.54	na	na		na	no		0	0	0	0	0	0	0	0	0	0	0	0	0
SuBe_737/468	Suletice-Berand	Lower Oligocene	Lauraceae	Laurophyllum	Laurophyllum_cfacutimontanum	evergreen_(evergreen)	shrub to small tree	entire	A	A	A	AB	0.94219	1213.07	3.08388	3.63371	83.8609	23.0786	1142.94	na	na		na	no		0	0	0	0	0	0	0	0	0	0	0	0	0
SuBe_737/873	Suletice-Berand	Lower Oligocene	Elaeocarpaceae	Sloanea	Sloanea_artocarpites	evergreen_(evergreen)	tree_(tree)	dentate	F	F	F	EF	0.888263	2255.65	3.35327	2.32416	87.0904	37.4717	2003.61	na	na		na	yes	skeleton	13.805	0.612019	0.689006	0	0	0	0	13.805	0.612019	0	0	0	0
SuBe_766/759	Suletice-Berand	Lower Oligocene	Sapindaceae	Acer	Acer_palaeosaccharinum	deciduous_(deciduous)	tree_(tree)	dentate	O or P	P	P	OP	0.872385	2767.68	3.44212	0.854921	79.8639	93.4166	2414.49	na	na		na	no		0	0	0	0	0	0	0	0	0	0	0	0	0
SuBe_788/5	Suletice-Berand	Lower Oligocene	Sapindaceae	Acer	Acer_tricuspidatum	deciduous_(deciduous)	tree_(tree)	dentate	P	P	P	OP	0.707081	3154.07	3.49887	0.809863	82.3523	101.687	2230.18	na	na		na	no		0	0	0	0	0	0	0	0	0	0	0	0	0
SuBe_790/688	Suletice-Berand	Lower Oligocene	Elaeocarpaceae	Sloanea	Sloanea_artocarpites	evergreen_(evergreen)	tree_(tree)	dentate	F	F	F	EF	0.906876	3079.69	3.48851	2.57527	110.05	42.7335	2792.89	na	na		na	yes	hole/margin	75.184	2.44129	2.69197	6.087	0.19765	69.097	2.24364	0	0	0	0	0	0
SuBe_790/909	Suletice-Berand	Lower Oligocene	Sapindaceae	Acer	Acer_tricuspidatum	deciduous_(deciduous)	tree_(tree)	dentate	O or P	P	P	OP	0.780887	1421.75	3.15282	1.21973	59.6903	48.9375	1110.22	0.941178	1.84551	obs	70.0659	no		0	0	0	0	0	0	0	0	0	0	0	0	0
SuBe_794/659_2	Suletice-Berand	Lower Oligocene	Sapindaceae	Acer	Acer_angustilobum	deciduous_(deciduous)	tree_(tree)	dentate	O	P	O	OP	0.922736	1117.77	3.04835	1.36033	57.562	42.3146	1031.41	na	na		na	no		0	0	0	0	0	0	0	0	0	0	0	0	0
SuBe_828/730	Suletice-Berand	Lower Oligocene	Oleaceae	Oleinites	Oleinites_maii	evergreen_(evergreen)	tree_(tree)	entire	A	A	A	AB	0.957305	2389.92	3.37838	2.73681	103.615	37.8598	2287.88	na	na		na	no		0	0	0	0	0	0	0	0	0	0	0	0	0
SuBe_871/72	Suletice-Berand	Lower Oligocene	Platanaceae	Platanus	Platanus_neptuni	deciduous_(deciduous)	tree_(tree)	dentate	E	E	E	EF	0.888015	2620.95	3.41846	3.44937	117.731	34.1311	2327.44	na	na		na	yes	hole/margin	235.252	8.97584	10.1078	51.768	1.97516	183.484	7.00068	0	0	0	0	0	0
SuBe_875/802	Suletice-Berand	Lower Oligocene	Juglandaceae	Engelhardia	Engelhardia_orsbergensis	evergreen_(evergreen)	tree_(tree)	dentate	E	E	E	EF	0.989736	1677.88	3.22476	4.01579	105.665	26.3123	1660.66	na	na		na	no		0	0	0	0	0	0	0	0	0	0	0	0	0
SuBe_885/761	Suletice-Berand	Lower Oligocene	Sapindaceae	Acer	Acer_angustilobum	deciduous_(deciduous)	tree_(tree)	dentate	P	P	P	OP	0.993256	1163.4	3.06573	0.914784	57.0799	62.3972	1155.55	na	na		na	no		0	0	0	0	0	0	0	0	0	0	0	0	0
SuBe_912/881	Suletice-Berand	Lower Oligocene	Lauraceae	Laurophyllum	Laurophyllum_sp	evergreen_(evergreen)	shrub to small tree	entire	A	A,B	A	AB	0.854236	1185.4	3.07386	6.26096	105.094	16.7856	1012.61	na	na		na	no		0	0	0	0	0	0	0	0	0	0	0	0	0
