# Supplementary material for: An integrated leaf trait analysis of two Paleogene leaf floras
Source: PeerJ journal article supplement (doi:10.7717/peerj.15140), 2023-04-10

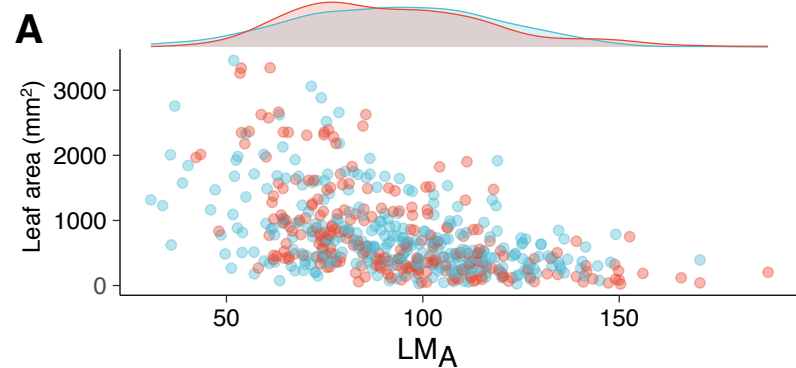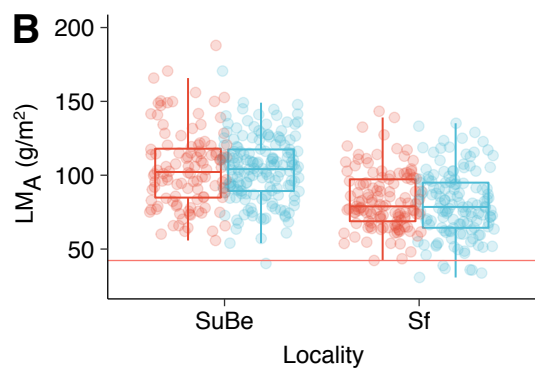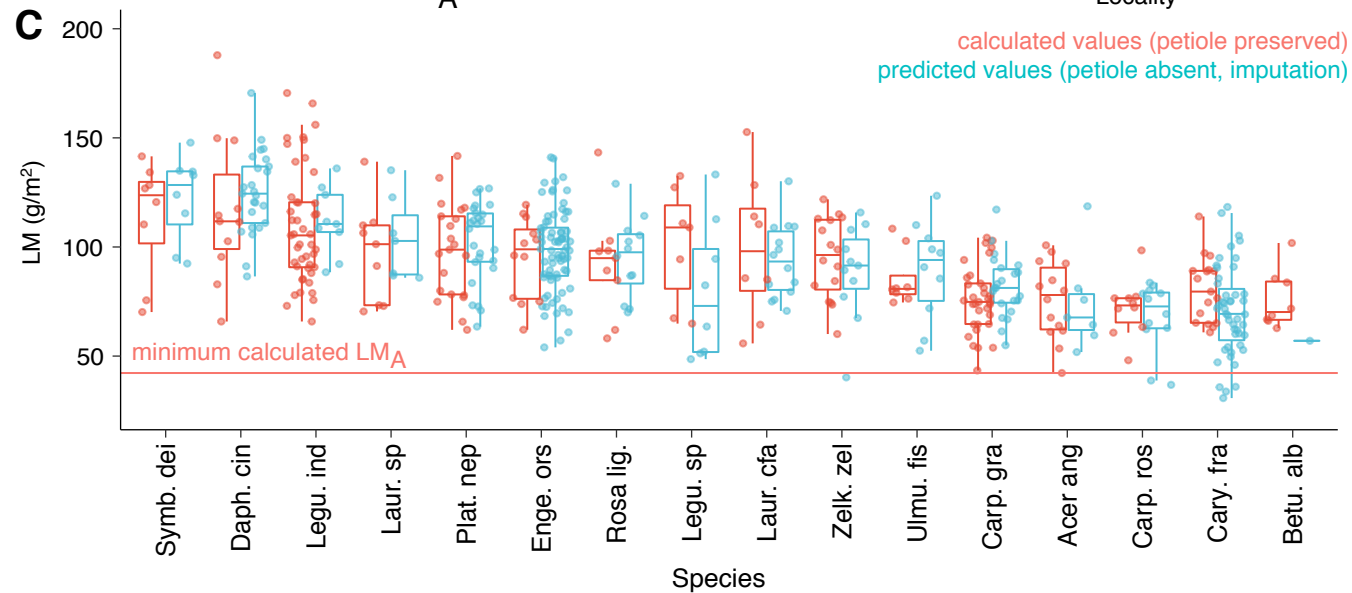

Supplement: Supplemental_Figure_S1.pdf [file Supplemental_Figure_S1.pdf]
