# Supplementary material for: An integrated leaf trait analysis of two Paleogene leaf floras
Source: PeerJ journal article supplement (doi:10.7717/peerj.15140), 2023-04-10
Supplement: Supplemental_Table_S4.pdf [file Supplemental_Table_S4.pdf]

| Taxonomy                        | n    | n (LM <sub>A</sub> ) | Mean LM <sub>A</sub> (g/m <sup>2</sup> ) | Pheno | TCT  | % Dam | DT list                          | DTO | DT richness      |
|---------------------------------|------|----------------------|------------------------------------------|-------|------|-------|----------------------------------|-----|------------------|
| <b>Betulaceae</b>               | 1691 |                      |                                          |       |      | 5.26  | 1;2;3;5;12;14;16;26;57;78;81;214 | 99  | 1.04 (SD = 0.97) |
| <i>Carpinus grandis</i>         | 1068 | 36                   | 75.25 (SD = 14.88)                       | d     | F    | 4.40  | 2;3;5;12;14;16;26;57;78;81;214   | 50  | 0.86 (SD = 0.87) |
| <i>Carpinus roscheri</i>        | 284  | 10                   | 71.91 (SD = 12.44)                       | d     | F    | 8.45  | 1;2;3;5;12;14;57;78;214          | 29  | 1.77 (SD = 1.25) |
| <i>Betula alboides</i>          | 66   | 9                    | 76.09 (SD = 11.78)                       | d     | F    | 9.09  | 2;14;57                          | 7   | 1.47 (SD = 0.79) |
| <b>Juglandaceae</b>             | 1293 |                      |                                          |       |      | 6.65  | 1;2;3;5;12;13;14;15;16;50;57;81  | 99  | 1.30 (SD = 1.08) |
| <i>Carya fragiliformis</i>      | 1262 | 17                   | 80.49 (SD = 14.42)                       | d     | F    | 6.81  | 1;2;3;5;12;13;14;15;16;50;57;81  | 99  | 1.33 (SD = 1.09) |
| <i>Cyclocarya</i> sp.           | 22   |                      |                                          | d     | F    |       |                                  |     |                  |
| <b>Lauraceae</b>                | 470  |                      |                                          |       |      | 3.62  | 2;12;14;30;31;81                 | 17  | 0.68 (SD = 0.75) |
| <i>D. cinnamomifolia</i>        | 103  | 7                    | 125.65 (SD = 21.92)                      | e     | C, D | 1.94  | 31;81                            | 2   | 0.39 (SD = 0.56) |
| <i>L. acutimontanum</i>         | 31   |                      |                                          | e     | A    | 9.68  | 2;12;14                          | 3   | 2.00 (SD = 0.79) |
| <b>Sapindaceae</b>              | 421  |                      |                                          |       |      | 2.38  | 2;5;12;14;32;57                  | 15  | 0.67 (SD = 1.00) |
| <i>A. (cf.) angustilobum</i>    | 140  | 15                   | 75.20 (SD = 16.54)                       | d     | P    | 1.43  | 12;32                            | 2   | 0.29 (SD = 0.49) |
| <i>A. (cf.) tricuspdatum</i>    | 73   |                      |                                          | d     | P    | 2.74  | 2;5;12                           | 4   | 1.04 (SD = 1.28) |
| <i>A. ruemianum</i>             | 32   | 5                    | 84.70 (SD = 29.76)                       | d     | P    | 6.25  | 2                                | 2   | 0.88 (SD = 0.32) |
| <i>A. palaeosaccharinum</i>     | 21   |                      |                                          | d     | P    | 4.76  | 5;57                             | 2   | 2.00 (SD = 0.00) |
| <b>Rosaceae</b>                 | 251  |                      |                                          |       |      | 2.79  | 12;14                            | 7   | 0.50 (SD = 0.59) |
| <i>Rosa lignitum</i>            | 248  | 9                    | 92.39 (SD = 23.43)                       | d     | E    | 2.82  | 12;14                            | 7   | 0.50 (SD = 0.59) |
| <b>Ulmaceae</b>                 | 183  |                      |                                          |       |      | 2.19  | 12;13                            | 4   | 0.41 (SD = 0.55) |
| <i>Ulmus fischeri</i>           | 115  | 8                    | 85.54 (SD = 11.88)                       | d     | F    | 2.61  | 12;13                            | 3   | 0.50 (SD = 0.60) |
| <i>Zelkova zelkovifolia</i>     | 30   |                      |                                          | d     | F    |       |                                  |     |                  |
| <b>Platanaceae</b> ≙            |      |                      |                                          |       |      |       |                                  |     |                  |
| <i>Platanus neptuni</i>         | 82   | 10                   | 108.93 (SD = 24.59)                      | d     | E    | 6.10  | 2;12;14                          | 5   | 1.12 (SD = 0.81) |
| <b>Magnoliaceae</b> ≙           |      |                      |                                          |       |      |       |                                  |     |                  |
| <i>M. seifhenndorsdorfensis</i> | 64   |                      |                                          | e     | A, B | 1.56  | 2                                | 1   | 0.32 (SD = 0.47) |
| <b>Salicaceae</b>               | 39   |                      |                                          |       |      | 5.13  | 5;15                             | 2   | 1.05 (SD = 0.70) |
| <i>Salix varians</i>            | 23   |                      |                                          | d     | F    | 4.35  | 15                               | 1   | 0.91 (SD = 0.29) |
| <b>Fagaceae</b>                 | 33   |                      |                                          |       |      | 6.06  | 2;12                             | 2   | 1.25 (SD = 0.67) |
| <i>C. lonchitiforme</i>         | 24   |                      |                                          | e     | F    | 4.17  | 2                                | 1   | 0.87 (SD = 0.34) |
| <b>Simaroubaceae</b> ≙          |      |                      |                                          |       |      |       |                                  |     |                  |
| <i>Ailanthus prescheri</i>      | 29   |                      |                                          | d     | E, F |       |                                  |     |                  |

#### Notes.

|                       |                                                                         |
|-----------------------|-------------------------------------------------------------------------|
| n:                    | Number of leaves in the assemblage                                      |
| n (LM <sub>A</sub> ): | Number of leaf mass per area (LM <sub>A</sub> ) values                  |
| Pheno:                | Phenology (d: deciduous, e: evergreen, see Material & Methods)          |
| TCT:                  | Taxonomy-based Trait Combination Type (see Material & Methods)          |
| % DAM:                | Percentage of damaged leaves (damage frequency, see Material & Methods) |
| DT list:              | List of insect damage types (DTs) after Labandeira et al. (2007)        |
| DTO:                  | Damage type occurrence (see Material & Methods)                         |
| DT richness:          | Damage type richness standardized on 20 leaves (see Material & Methods) |
| SD:                   | Standard deviation                                                      |
| A.:                   | <i>Acer</i>                                                             |
| C.:                   | <i>Castaneophyllum</i>                                                  |

|     |                     |
|-----|---------------------|
| D.: | <i>Daphnogene</i>   |
| L.: | <i>Laurophyllum</i> |
| M.: | <i>Magnolia</i>     |
