# Supplementary material for: An integrated leaf trait analysis of two Paleogene leaf floras
Source: PeerJ journal article supplement (doi:10.7717/peerj.15140), 2023-04-10
Supplement: Supplemental_Table_S5.pdf [file Supplemental_Table_S5.pdf]

| Taxonomy                                          | n   | n (LM <sub>A</sub> ) | Mean LM <sub>A</sub> (g/m <sup>2</sup> ) | Pheno | TCT  | % Dam | DT list                              | DTO | DT richness      |
|---------------------------------------------------|-----|----------------------|------------------------------------------|-------|------|-------|--------------------------------------|-----|------------------|
| <b>Juglandaceae</b>                               | 404 |                      |                                          |       |      | 12.62 | 1;2;3;5;7;12;13;14;16;17;26;30;50;61 | 56  | 2.25 (SD = 1.25) |
| <i>E.</i> <sup>10</sup> <i>orsbergensis</i>       | 380 | 12                   | 94.91 (SD = 17.94)                       | e     | E    | 11.84 | 1;2;3;5;7;12;13;14;16;30;61          | 49  | 2.03 (SD = 1.14) |
| <b>Lauraceae</b>                                  | 361 |                      |                                          |       |      | 10.80 | 1;2;3;4;5;7;12;13;14;20;61;127       | 46  | 2.22 (SD = 1.41) |
| <i>D.</i> <sup>11</sup> <i>cinnamomifolia</i>     | 92  | 11                   | 117.15 (SD = 32.52)                      | e     | C, D | 8.70  | 1;3;5;12;13;14                       | 10  | 1.94 (SD = 1.23) |
| <i>L.</i> <sup>12</sup> cf. <i>acutimontanum</i>  | 77  | 8                    | 99.55 (SD = 30.67)                       | e     | A    | 10.39 | 2;3;4;12;13;14;20                    | 11  | 2.58 (SD = 1.47) |
| <i>L.</i> <sup>12</sup> cf. <i>pseudoprinceps</i> | 50  |                      |                                          | e     | A    | 4.00  | 12                                   | 2   | 0.65 (SD = 0.48) |
| <b>Elaeocarpaceae</b> $\hat{=}$                   | 112 |                      |                                          |       |      |       |                                      |     |                  |
| <i>Sloanea olmedifolia</i>                        |     |                      |                                          | e     | F    | 20.54 | 2;3;5;12;17;20;30;57;61              | 26  | 3.30 (SD = 1.25) |
| <b>Platanaceae</b> $\hat{=}$                      | 99  | 12                   | 95.10 (SD = 23.49)                       | d     | E    | 8.08  | 2;5;12;16;18;38                      | 11  | 1.98 (SD = 1.31) |
| <i>Platanus neptuni</i>                           |     |                      |                                          |       |      |       |                                      |     |                  |
| <b>Sapindaceae</b>                                | 70  |                      |                                          |       |      | 17.14 | 1;2;3;5;12;50                        | 15  | 3.20 (SD = 1.45) |
| <i>Acer tricuspidatum</i>                         | 21  |                      |                                          | d     | P    | 28.57 | 1;2;3;50                             | 8   | 4.00 (SD = 0.00) |
| <b>Ulmaceae</b> $\hat{=}$                         | 55  | 13                   | 99.24 (SD = 15.64)                       | d     | F    | 12.73 | 2;3;5;12;16;78                       | 9   | 2.85 (SD = 1.23) |
| <i>Zelkova zelkovifolia</i>                       |     |                      |                                          |       |      |       |                                      |     |                  |
| <b>Symplocaceae</b> $\hat{=}$                     | 29  | 8                    | 113.45 (SD = 28.93)                      | e     | E, F | 3.45  | 13                                   | 1   | 0.71 (SD = 0.45) |
| <i>S.</i> <sup>13</sup> <i>deichmuelleri</i>      |     |                      |                                          |       |      |       |                                      |     |                  |
| <b>Magnoliaceae</b> $\hat{=}$                     | 22  |                      |                                          |       |      |       |                                      |     |                  |
| <i>Magnolia</i> sp.                               |     |                      |                                          | e     | A    |       |                                      |     |                  |
| <b>Cornaceae</b> $\hat{=}$                        | 20  |                      |                                          |       |      |       |                                      |     |                  |
| <i>Cornus studeri</i>                             |     |                      |                                          | d     | B    | 5.00  | 1                                    | 1   | 1.00 (SD = 0.00) |

**Notes.**

- n: Number of leaves in the assemblage  
n (LM<sub>A</sub>): Number of leaf mass per area (LM<sub>A</sub>) values  
Pheno: Phenology (d: deciduous, e: evergreen, see Material & Methods)  
TCT: Taxonomy-based Trait Combination Type (see Material & Methods)  
% DAM: Percentage of damaged leaves (damage frequency, see Material & Methods)  
DT list: List of insect damage types (DTs) after Labandeira et al. (2007)  
DTO: Damage type occurrence (see Material & Methods)  
DT richness: Damage type richness standardized on 20 leaves (see Material & Methods)  
SD: Standard deviation  
*D.*: *Daphnogene*  
*E.*: *Engelhardia*  
*L.*: *Laurophyllum*  
*S.*: *Symplocos*
