# Supplementary material for: An integrated leaf trait analysis of two Paleogene leaf floras
Source: PeerJ journal article supplement (doi:10.7717/peerj.15140), 2023-04-10
Supplement: Supplemental_Table_S6.pdf [file Supplemental_Table_S6.pdf]

|                 | Leaf traits          |         |                |         | Plant-insect interaction |         |                   |         |                      |         |
|-----------------|----------------------|---------|----------------|---------|--------------------------|---------|-------------------|---------|----------------------|---------|
|                 | (M1) LM <sub>A</sub> |         | (M2) Leaf size |         | (M3) Presence/absence    |         | (M4) Damaged area |         | (M5) Herbivory index |         |
|                 | Chi2                 | p-value | Chi2           | p-value | Chi2                     | p-value | Chi2              | p-value | Chi2                 | p-value |
| LM <sub>A</sub> | not tested           |         | not tested     |         | 4.97                     | < 0.001 | ns                | ns      | 2.46                 | 0.12    |
| Leaf size       | 71.64                | < 0.001 | not tested     |         | 2.60                     | 0.11    | 9.94              | < 0.01  | not tested           |         |
| Phenology       | 56.17                | < 0.001 | 13.41          | < 0.01  | ns                       | ns      | 10.85             | < 0.01  | 8.64                 | 0.01    |
| Locality        | 2.14                 | 0.14    | 2.89           | 0.09    | 13.39                    | < 0.001 | ns                | ns      | ns                   | ns      |
| Family          | ns                   | ns      | ns             | ns      | ns                       | ns      | ns                | ns      | ns                   | ns      |
| Species         | 146.73               | < 0.001 | 149.38         | < 0.001 | ns                       | ns      | ns                | ns      | ns                   | ns      |
| Categorical TCT | ns                   | ns      | ns             | ns      | 8.41                     | 0.04    | ns                | ns      | ns                   | ns      |
| Combined TCT    | ns                   | ns      | ns             | ns      | ns                       | ns      | ns                | ns      | ns                   | ns      |
| Growth form     | ns                   | ns      | ns             | ns      | ns                       | ns      | ns                | ns      | ns                   | ns      |
| IA              | 6.18                 | 0.01    | 18.09          | < 0.001 | ns                       | ns      | not tested        |         | not tested           |         |
| AIC             | 4431.38              |         | 7525.76        |         | 315.97                   |         | 426.01            |         | 236.26               |         |
| R2              | 0.52                 |         | 0.53           |         | 0.06                     |         | 0.58              |         | 0.24                 |         |
| n               | 506                  |         | 506            |         | 506                      |         | 50                |         | 50                   |         |

**Notes.**

Chi2: Chi-square values

LM<sub>A</sub>: Leaf mass per area

M: Model number (formula given in Results)

Categorical TCT: Classes of TCTs (TCT without considering the secondary venation type, e.g., EF)

Combined TCT: TCTs based on a combined specimen and taxonomy-based approach; see Material & Methods

IA: Preservation (Area) index (i.e., the proportion of a leaf preserved as fossil; see Material & Methods)

AIC: Akaike Information Criterion

R2: Nagelkerke's R2 (reflects the explanatory power of the models; function R2, package *performance*)

n: Number of leaves used to fit the model's

ns: "Nonsignificant" indicates variables whose effect was tested but which are not significant (see model selection procedure with the step function, see Material & Methods)
